# Supplementary material for: Phenocopy – A Strategy to Qualify Chemical Compounds during Hit-to-Lead and/or Lead Optimization
Source: PLOS journal article supplement (doi:10.1371/journal.pone.0014272), 2010-12-10

Figure S5

### A TGF- $\beta$ Effect (On Target Effect)

- > No regulation by compounds only (\*)
- > Dose-dependent down-regulation of Serpine-1
- > High dose titration reaches w/o TGF- $\beta$  levels of Serpine-1 (#)

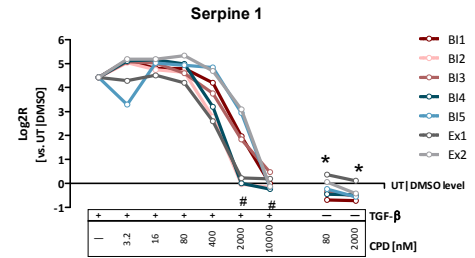

### B Off Target Effect

- > ILMN\_1829845 is dose-dependent regulated by compound BI1 only (\*)
- > Regulation of ILMN\_1829845 is not TGF- $\beta$ -dependent (#)
- > All other compound do not affect the expression of ILMN\_1829845

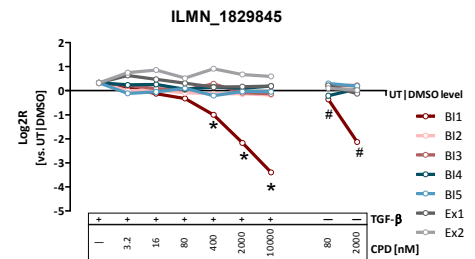

### C On & Off Target Effect (additive)

- > LAMC2 is regulated ~2-fold by TGF- $\beta$  signaling (on-target) (\*)
- > All compounds show a dose-dependent down-regulation of LAMC2
- > Compound BI1 down-regulates LAMC2 also TGF- $\beta$ -independent (off-target)(#)
- > For BI1 an additive effect of on- and off-target effect is observed (\$)

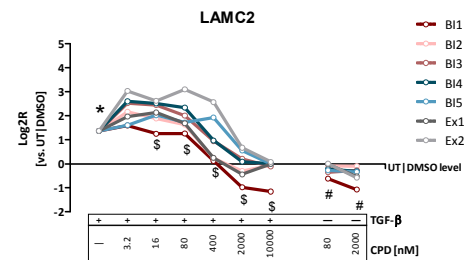

### D On & Off Target Effect (inverse)

- > BI1 shows a dose-dependent down-regulation of ARID5B in a TGF- $\beta$ -independent manner (off-target) (\*)
- > TGF- $\beta$  stimulation revealed a strong down-regulation of ARID5B (on target) (#)
- > the regulation of ARID5B is not affected by BI1 titration - inverse effect (on target vs. off target effect) (&)
- > all other compounds are able to inhibit the TGF- $\beta$  effect (on target) dose-dependently (\$)

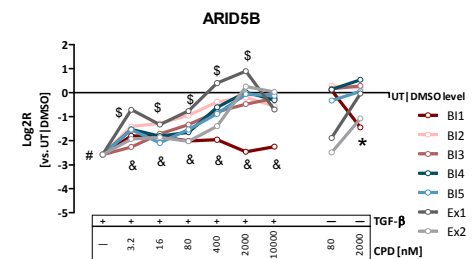

### E On & Off Target Effect (bipolar)

- > All compounds are inducing the expression of C9ORF152 in a TGF- $\beta$ -independent manner (off-target) (\*)
- > Under TGF- $\beta$  stimulation the compounds BI1, BI2 & Ex1 tend to induce the C9ORF152 expression in a dose-dependent manner at lower concentration (on target) (#)
- > BI1, BI2 & Ex1 show a bipolar regulation of C9ORF152: they induce the expression at lower level, whereas they down-regulate C9ORF152 at high doses (\$)

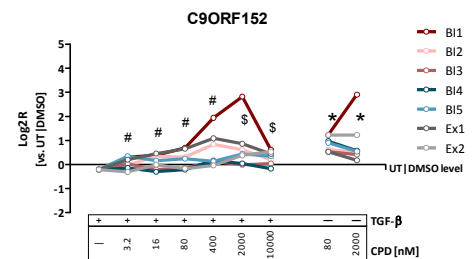

### F Off Target Effect (common)

- > All compounds are reducing SCARNA9 expression in TGF- $\beta$ -independent manner (off-target) (\*)
- > TGF- $\beta$  stimulation only showed no regulation of SCARNA9 expression (#)
- > All compounds are down-regulating SCARNA9 in dose-independent manner (\$): treatment effect?

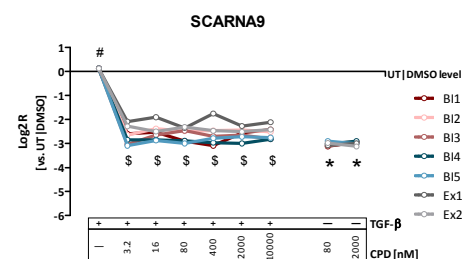

Supplement: S5 (10.1371/journal.pone.0014272.s005) [file journal.pone.0014272.s005]
