# Supplementary material for: Phenocopy – A Strategy to Qualify Chemical Compounds during Hit-to-Lead and/or Lead Optimization
Source: PubMed Central journal article supplement (PMC3000806; doi:10.1371/journal.pone.0014272), 2010-12-10

Figure S3

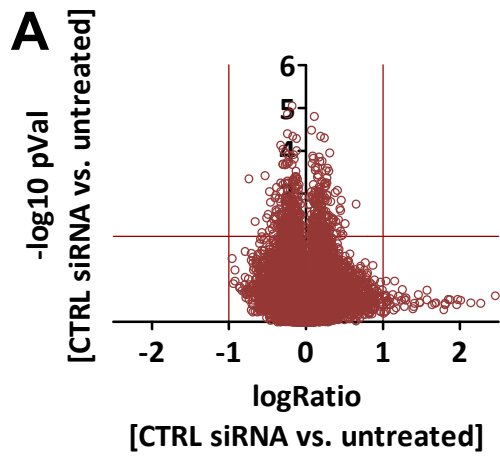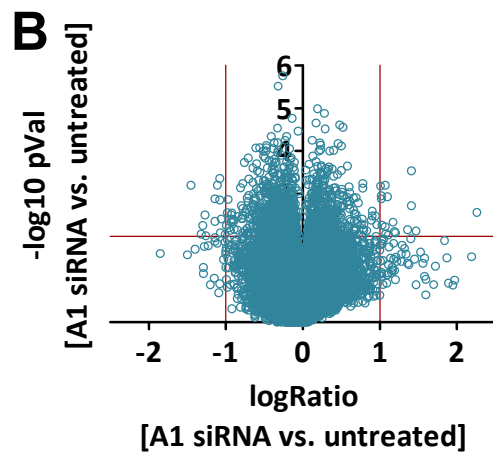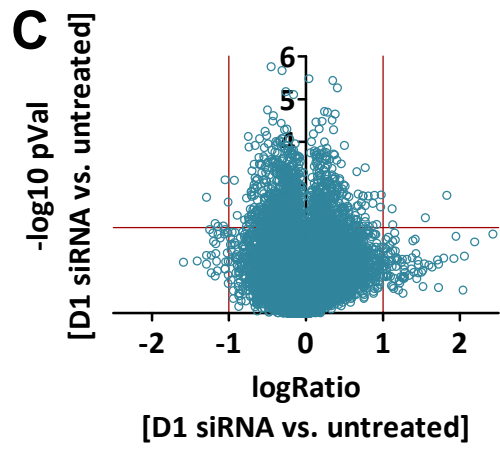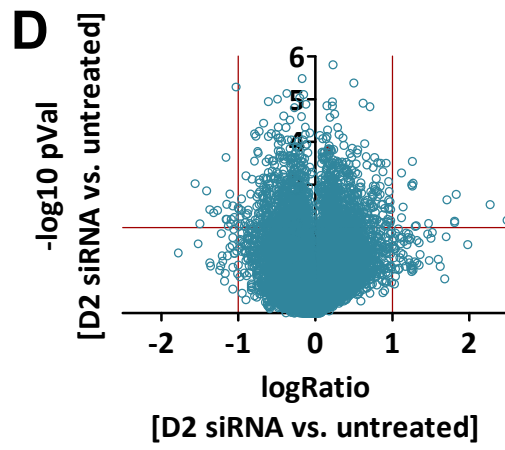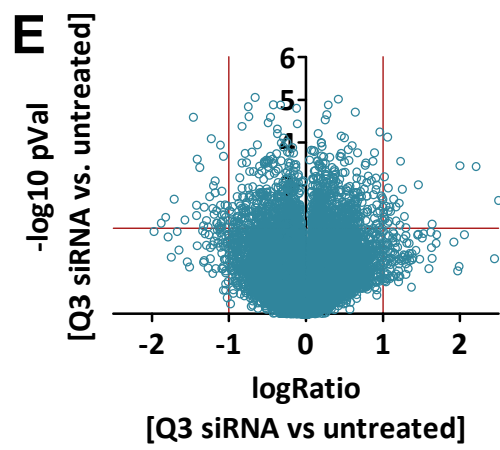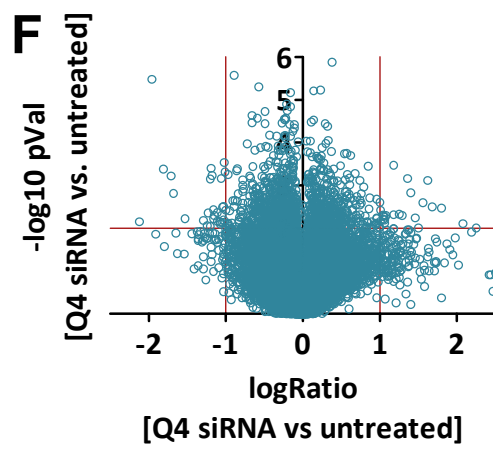

Supplement: pone.0014272.s003.pdf [file pone.0014272.s003.pdf]
