# Supplementary material for: Phenocopy – A Strategy to Qualify Chemical Compounds during Hit-to-Lead and/or Lead Optimization
Source: PLoS One. 2010 Dec 10;5(12):e14272. doi: 10.1371/journal.pone.0014272 (PMC3000806; doi:10.1371/journal.pone.0014272)
Supplement: Table S1 — TGF-β Signature. Listed are genes significantly regulated upon TGF-β stimulation: (a) NCE treatment, (b) siRNA treatment. (1.02 MB XLS) [file pone.0014272.s008.xls]

## Sheet: 2h TGFb
Illumina Identifier	HGNC Gene Symbol	Gene Description	Refseq ID	UT 2h	UT+TGFb 2h	LR +/- TGFb 2h	-log10 pVAL LR +/- TGFb 2h
ILMN_1667295	VASN	vasorin (VASN), mRNA.	NM_138440.2	6.64	12.03	5.4	48.93
ILMN_1744381	SERPINE1	serpin peptidase inhibitor, clade E (nexin, plasminogen activator inhibitor type 1), member 1 (SERPINE1), mRNA.	NM_000602.1	7.06	12.4	5.34	44.42
ILMN_2115125	CTGF	connective tissue growth factor (CTGF), mRNA.	NM_001901.2	7.04	10.98	3.94	35.07
ILMN_1699829	CTGF	connective tissue growth factor (CTGF), mRNA.	NM_001901.1	6.94	11.08	4.15	34.27
ILMN_2203891	SMAD7	SMAD family member 7 (SMAD7), mRNA.	NM_005904.2	7.27	10.14	2.87	34.27
ILMN_1776936	ANKRD38	ankyrin repeat domain 38 (ANKRD38), mRNA.	NM_181712.3	6.23	9.55	3.32	33.07
ILMN_1768534	BHLHB2	basic helix-loop-helix domain containing, class B, 2 (BHLHB2), mRNA.	NM_003670.1	8.99	12.05	3.06	31.12
ILMN_2376723	CDKN2B	cyclin-dependent kinase inhibitor 2B (p15, inhibits CDK4) (CDKN2B), transcript variant 2, mRNA.	NM_078487.2	9.22	12.22	3	30.15
ILMN_2309156	PMEPA1	prostate transmembrane protein, androgen induced 1 (PMEPA1), transcript variant 2, mRNA.	NM_199169.1	9.21	11.7	2.49	29.23
ILMN_1705750	TGM2	transglutaminase 2 (C polypeptide, protein-glutamine-gamma-glutamyltransferase) (TGM2), transcript variant 1, mRNA.	NM_004613.2	6.77	10.16	3.39	28.43
ILMN_1806023	JUN	jun oncogene (JUN), mRNA.	NM_002228.3	8.39	11.87	3.48	28.34
ILMN_1784602	CDKN1A	cyclin-dependent kinase inhibitor 1A (p21, Cip1) (CDKN1A), transcript variant 1, mRNA.	NM_000389.2	10.93	13.1	2.17	27.5
ILMN_1751607	FOSB	FBJ murine osteosarcoma viral oncogene homolog B (FOSB), mRNA.	NM_006732.1	8.28	11.41	3.13	26.96
ILMN_1723198	CDKN2B	cyclin-dependent kinase inhibitor 2B (p15, inhibits CDK4) (CDKN2B), transcript variant 1, mRNA.	NM_004936.3	8.05	11.05	3.01	26.96
ILMN_1749414	MGC4294	PREDICTED: hypothetical protein MGC4294 (MGC4294), misc RNA.	XR_017834.1	5.95	7.91	1.97	26.88
ILMN_2086077	JUNB	jun B proto-oncogene (JUNB), mRNA.	NM_002229.2	7.48	9.82	2.34	26.34
ILMN_1682717	IER3	immediate early response 3 (IER3), mRNA.	NM_003897.3	9.57	12.39	2.82	25.45
ILMN_1734276	PMEPA1	prostate transmembrane protein, androgen induced 1 (PMEPA1), transcript variant 2, mRNA.	NM_199169.1	10.34	12.68	2.34	24.96
ILMN_1812297	CYP26B1	cytochrome P450, family 26, subfamily B, polypeptide 1 (CYP26B1), mRNA.	NM_019885.2	9.1	11.14	2.04	24.96
ILMN_1704247	LAMA3	laminin, alpha 3 (LAMA3), transcript variant 2, mRNA.	NM_000227.2	7.26	9.42	2.16	24.4
ILMN_1716608	NGF	nerve growth factor (beta polypeptide) (NGF), mRNA.	NM_002506.2	6.47	8.53	2.06	24.38
ILMN_1720158	ETS2	v-ets erythroblastosis virus E26 oncogene homolog 2 (avian) (ETS2), mRNA.	NM_005239.4	8.97	10.86	1.89	23.97
ILMN_1691376	JAG1	jagged 1 (Alagille syndrome) (JAG1), mRNA.	NM_000214.1	9.45	11.16	1.71	23.66
ILMN_1708934	ADM	adrenomedullin (ADM), mRNA.	NM_001124.1	12.38	10.66	-1.72	23.51
ILMN_1772824	WNT5B	wingless-type MMTV integration site family, member 5B (WNT5B), transcript variant 1, mRNA.	NM_032642.2	6.58	8.58	2	23.27
ILMN_2203896	SMAD7	SMAD family member 7 (SMAD7), mRNA.	NM_005904.2	7.29	9.99	2.7	22.81
ILMN_2111237	MN1	meningioma (disrupted in balanced translocation) 1 (MN1), mRNA.	NM_002430.2	8.34	10.25	1.91	22.77
ILMN_1797875	ALOX5AP	arachidonate 5-lipoxygenase-activating protein (ALOX5AP), mRNA.	NM_001629.2	5.96	8.08	2.12	22.66
ILMN_2184373	IL8	interleukin 8 (IL8), mRNA.	NM_000584.2	6.91	9.27	2.37	22.46
ILMN_1792978	HAS2	hyaluronan synthase 2 (HAS2), mRNA.	NM_005328.1	6.43	8.67	2.24	22.27
ILMN_1775380	SMOX	spermine oxidase (SMOX), transcript variant 4, mRNA.	NM_175842.1	9.55	11.19	1.64	22.26
ILMN_1736834	SKIL	SKI-like oncogene (SKIL), mRNA.	NM_005414.2	6.75	9.56	2.81	22.13
ILMN_1788107	IL11	interleukin 11 (IL11), mRNA.	NM_000641.2	6.58	8.9	2.32	22.09
ILMN_1694084	PSCD1	pleckstrin homology, Sec7 and coiled-coil domains 1(cytohesin 1) (PSCD1), transcript variant 2, mRNA.	NM_017456.1	9.94	11.53	1.59	21.79
ILMN_2261076	NEDD9	neural precursor cell expressed, developmentally down-regulated 9 (NEDD9), transcript variant 1, mRNA.	NM_006403.2	7.68	10.05	2.38	21.58
ILMN_1689306	TMC7	transmembrane channel-like 7 (TMC7), mRNA.	NM_024847.2	6.96	8.94	1.98	21.4
ILMN_2186061	PFKFB3	6-phosphofructo-2-kinase/fructose-2,6-biphosphatase 3 (PFKFB3), mRNA.	NM_004566.2	10.2	11.9	1.71	21.28
ILMN_1803593	WNT3	wingless-type MMTV integration site family, member 3 (WNT3), mRNA.	NM_030753.3	8.23	10.41	2.18	20.61
ILMN_1655595	SERPINE2	serpin peptidase inhibitor, clade E (nexin, plasminogen activator inhibitor type 1), member 2 (SERPINE2), mRNA.	NM_006216.2	12.53	13.86	1.33	20.53
ILMN_1713952	C1orf106	chromosome 1 open reading frame 106 (C1orf106), mRNA.	NM_018265.1	10.96	12.7	1.74	20.37
ILMN_1777513	KCTD11	potassium channel tetramerisation domain containing 11 (KCTD11), mRNA.	NM_001002914.2	7.82	9.81	2	20.18
ILMN_2359345	NET1	neuroepithelial cell transforming gene 1 (NET1), transcript variant 2, mRNA.	NM_005863.3	9.61	11.45	1.84	20.17
ILMN_1730670	FSTL3	follistatin-like 3 (secreted glycoprotein) (FSTL3), mRNA.	NM_005860.2	8.59	10.51	1.92	20.15
ILMN_1902308		AGENCOURT_13567612 NIH_MGC_184 cDNA clone IMAGE:30326575 5, mRNA sequence		9.53	11.66	2.13	19.95
ILMN_1670130	ARID3A	AT rich interactive domain 3A (BRIGHT-like) (ARID3A), mRNA.	NM_005224.2	7.25	8.85	1.6	19.93
ILMN_1705231	SLCO2A1	solute carrier organic anion transporter family, member 2A1 (SLCO2A1), mRNA.	NM_005630.1	8.36	10.29	1.94	19.68
ILMN_2367258	SMOX	spermine oxidase (SMOX), transcript variant 2, mRNA.	NM_175840.1	8.14	9.83	1.69	19.51
ILMN_1812968	SOX18	SRY (sex determining region Y)-box 18 (SOX18), mRNA.	NM_018419.2	6.53	9.38	2.85	19.47
ILMN_1815023	PIM1	pim-1 oncogene (PIM1), mRNA.	NM_002648.2	8.84	10.32	1.49	19.21
ILMN_1692754	TMEM49	transmembrane protein 49 (TMEM49), mRNA.	NM_030938.2	10.79	12.44	1.66	19.14
ILMN_1781374	TUFT1	tuftelin 1 (TUFT1), mRNA.	NM_020127.1	10.9	12.4	1.5	19.11
ILMN_1895660		K-EST0058554 S13KMS5s1 cDNA clone S13KMS5s1-7-G08 5, mRNA sequence		5.62	7.68	2.06	18.91
ILMN_2054297	PTGS2	prostaglandin-endoperoxide synthase 2 (prostaglandin G/H synthase and cyclooxygenase) (PTGS2), mRNA.	NM_000963.1	8.27	10.31	2.04	18.89
ILMN_1767068	SMAD6	SMAD family member 6 (SMAD6), mRNA.	NM_005585.3	9.06	10.63	1.58	18.82
ILMN_1702487	SGK	serum/glucocorticoid regulated kinase (SGK), mRNA.	NM_005627.2	8.97	10.7	1.72	18.75
ILMN_1679754	ADRA1B	adrenergic, alpha-1B-, receptor (ADRA1B), mRNA.	NM_000679.3	6.43	8.63	2.2	18.63
ILMN_1752810	LARP6	La ribonucleoprotein domain family, member 6 (LARP6), transcript variant 1, mRNA.	NM_018357.2	8.73	10.33	1.6	18.63
ILMN_1743199	EGR2	early growth response 2 (Krox-20 homolog, Drosophila) (EGR2), mRNA.	NM_000399.2	6.43	8.37	1.93	18.59
ILMN_1706519	LAMC2	laminin, gamma 2 (LAMC2), transcript variant 2, mRNA.	NM_018891.1	7.74	10.22	2.48	18.53
ILMN_1735052	ULK1	unc-51-like kinase 1 (C. elegans) (ULK1), mRNA.	NM_003565.1	11.43	12.85	1.42	18.35
ILMN_1713751	ADAM19	ADAM metallopeptidase domain 19 (meltrin beta) (ADAM19), transcript variant 2, mRNA.	NM_033274.2	9.54	11.49	1.96	18.3
ILMN_1805665	FLRT3	fibronectin leucine rich transmembrane protein 3 (FLRT3), transcript variant 2, mRNA.	NM_198391.1	9.18	10.69	1.52	18.27
ILMN_1655740	SNAI2	snail homolog 2 (Drosophila) (SNAI2), mRNA.	NM_003068.3	8.99	10.63	1.64	18.22
ILMN_1704418	FOXD1	forkhead box D1 (FOXD1), mRNA.	NM_004472.2	9.55	11.14	1.59	18.22
ILMN_2388800	PPAP2B	phosphatidic acid phosphatase type 2B (PPAP2B), transcript variant 1, mRNA.	NM_003713.3	8.09	9.57	1.48	18.22
ILMN_1659206	RARA	retinoic acid receptor, alpha (RARA), transcript variant 1, mRNA.	NM_000964.2	10.33	11.6	1.27	18.22
ILMN_1807331	BLID	BH3-like motif containing, cell death inducer (BLID), mRNA.	NM_001001786.1	6.54	8.33	1.79	18.19
ILMN_1672102	PTPRB	protein tyrosine phosphatase, receptor type, B (PTPRB), mRNA.	NM_002837.2	7.35	8.98	1.63	18.19
ILMN_1741847	MMP10	matrix metallopeptidase 10 (stromelysin 2) (MMP10), mRNA.	NM_002425.1	7.94	9.75	1.81	18.18
ILMN_1705144	ULK1	unc-51-like kinase 1 (C. elegans) (ULK1), mRNA.	NM_003565.1	11.34	12.86	1.51	18.1
ILMN_1813704	KIAA1199	KIAA1199 (KIAA1199), mRNA.	NM_018689.1	7.23	9.2	1.97	18.06
ILMN_1730794	SERTAD4	SERTA domain containing 4 (SERTAD4), mRNA.	NM_019605.2	8.54	10.47	1.93	17.97
ILMN_1753439	RPTN	PREDICTED: repetin (RPTN), mRNA.	XM_937200.2	6.45	8.31	1.86	17.86
ILMN_1696956	ARID3B	AT rich interactive domain 3B (BRIGHT-like) (ARID3B), mRNA.	NM_006465.2	9.12	10.55	1.43	17.67
ILMN_2405305	ARNTL	aryl hydrocarbon receptor nuclear translocator-like (ARNTL), transcript variant 2, mRNA.	NM_001030272.1	7.67	9.35	1.69	17.5
ILMN_2044645	CGB1	chorionic gonadotropin, beta polypeptide 1 (CGB1), mRNA.	NM_033377.1	7.13	8.85	1.72	17.47
ILMN_1732197	MN1	meningioma (disrupted in balanced translocation) 1 (MN1), mRNA.	NM_002430.2	7.47	8.94	1.47	17.47
ILMN_1691410	BAMBI	BMP and activin membrane-bound inhibitor homolog (Xenopus laevis) (BAMBI), mRNA.	NM_012342.2	7.61	10.26	2.65	17.37
ILMN_1685663	CYP24A1	cytochrome P450, family 24, subfamily A, polypeptide 1 (CYP24A1), nuclear gene encoding mitochondrial protein, mRNA.	NM_000782.3	5.83	7.18	1.35	17.21
ILMN_2189027	LIPG	lipase, endothelial (LIPG), mRNA.	NM_006033.2	11.51	12.98	1.47	17.12
ILMN_2115005	FGD2	FYVE, RhoGEF and PH domain containing 2 (FGD2), mRNA.	NM_173558.2	6.54	8.42	1.88	17.02
ILMN_1698666	CST6	cystatin E/M (CST6), mRNA.	NM_001323.2	6.38	7.92	1.53	17.02
ILMN_1758719	NEDD9	neural precursor cell expressed, developmentally down-regulated 9 (NEDD9), transcript variant 1, mRNA.	NM_006403.2	6.61	8.48	1.88	17.01
ILMN_2267535	NET1	neuroepithelial cell transforming gene 1 (NET1), transcript variant 2, mRNA.	NM_005863.3	8.95	10.81	1.86	16.78
ILMN_1718387	LOR	loricrin (LOR), mRNA.	NM_000427.1	5.8	7.46	1.66	16.76
ILMN_2328094	DACT1	dapper, antagonist of beta-catenin, homolog 1 (Xenopus laevis) (DACT1), transcript variant 1, mRNA.	NM_016651.5	6.12	7.79	1.67	16.74
ILMN_1712475	HS3ST2	heparan sulfate (glucosamine) 3-O-sulfotransferase 2 (HS3ST2), mRNA.	NM_006043.1	10.11	11.75	1.64	16.72
ILMN_2184612	C3orf52	chromosome 3 open reading frame 52 (C3orf52), mRNA.	NM_024616.1	8.05	9.72	1.67	16.69
ILMN_1751465	BNC1	basonuclin 1 (BNC1), mRNA.	NM_001717.2	8.47	10.29	1.82	16.56
ILMN_1693242	ZNF342	zinc finger protein 342 (ZNF342), mRNA.	NM_145288.1	9.27	7.8	-1.47	16.48
ILMN_1788213	FRAT2	frequently rearranged in advanced T-cell lymphomas 2 (FRAT2), mRNA.	NM_012083.2	10.44	9.36	-1.07	16.44
ILMN_1706015	FAM43A	family with sequence similarity 43, member A (FAM43A), mRNA.	NM_153690.4	8.03	9.65	1.62	16.11
ILMN_1746502	LOC399978	PREDICTED: hypothetical LOC399978 (LOC399978), mRNA.	XM_944623.2	6.39	8.55	2.16	15.73
ILMN_1782050	CEBPD	CCAAT/enhancer binding protein (C/EBP), delta (CEBPD), mRNA.	NM_005195.3	9.23	8.02	-1.21	15.41
ILMN_1666222	PHACTR3	phosphatase and actin regulator 3 (PHACTR3), transcript variant 3, mRNA.	NM_183246.1	5.8	7.35	1.56	15.39
ILMN_1685339	TPM1	tropomyosin 1 (alpha) (TPM1), transcript variant 6, mRNA.	NM_001018008.1	7.04	8.56	1.53	15.37
ILMN_2082585	SNAI2	snail homolog 2 (Drosophila) (SNAI2), mRNA.	NM_003068.3	10.37	12	1.63	15.32
ILMN_1663092	CITED2	Cbp/p300-interacting transactivator, with Glu/Asp-rich carboxy-terminal domain, 2 (CITED2), mRNA.	NM_006079.3	8.91	7.41	-1.5	15.25
ILMN_2298301	BNC1	basonuclin 1 (BNC1), mRNA.	NM_001717.2	8.52	10.21	1.69	15.17
ILMN_1653292	PFKFB4	6-phosphofructo-2-kinase/fructose-2,6-biphosphatase 4 (PFKFB4), mRNA.	NM_004567.2	9.72	10.97	1.24	15.17
ILMN_2163790	CGB5	chorionic gonadotropin, beta polypeptide 5 (CGB5), mRNA.	NM_033043.1	6.41	8.09	1.68	15.09
ILMN_1679391	MAMDC2	MAM domain containing 2 (MAMDC2), mRNA.	NM_153267.3	8.36	9.77	1.41	15.09
ILMN_1657823	PMEPA1	prostate transmembrane protein, androgen induced 1 (PMEPA1), transcript variant 1, mRNA.	NM_020182.3	6.45	8.1	1.65	15.02
ILMN_1692177	TSC22D1	TSC22 domain family, member 1 (TSC22D1), transcript variant 2, mRNA.	NM_006022.2	10.33	11.65	1.32	14.99
ILMN_2374865	ATF3	activating transcription factor 3 (ATF3), transcript variant 4, mRNA.	NM_001040619.1	7.5	9.63	2.13	14.89
ILMN_2406035	LAMA3	laminin, alpha 3 (LAMA3), transcript variant 1, mRNA.	NM_198129.1	11.48	12.91	1.44	14.86
ILMN_2278152	TPM1	tropomyosin 1 (alpha) (TPM1), transcript variant 6, mRNA.	NM_001018008.1	7.12	8.71	1.59	14.83
ILMN_1656057	PLAU	plasminogen activator, urokinase (PLAU), mRNA.	NM_002658.2	10.35	11.72	1.38	14.81
ILMN_1684554	COL16A1	collagen, type XVI, alpha 1 (COL16A1), mRNA.	NM_001856.3	8.48	9.71	1.23	14.81
ILMN_1698020	DLC1	deleted in liver cancer 1 (DLC1), transcript variant 3, mRNA.	NM_024767.2	7.3	9.04	1.74	14.8
ILMN_1697733	CST6	PREDICTED: cystatin E/M (CST6), mRNA.	XM_001129442.1	6.27	7.84	1.57	14.79
ILMN_1721626	ARID5B	AT rich interactive domain 5B (MRF1-like) (ARID5B), mRNA.	NM_032199.1	10.27	8.56	-1.71	14.75
ILMN_1720865	OSBPL7	oxysterol binding protein-like 7 (OSBPL7), transcript variant 1, mRNA.	NM_145798.2	10.21	11.57	1.36	14.68
ILMN_1675448	ZFP36L1	zinc finger protein 36, C3H type-like 1 (ZFP36L1), mRNA.	NM_004926.2	11	12.29	1.29	14.65
ILMN_1718712	C20orf177	chromosome 20 open reading frame 177 (C20orf177), mRNA.	NM_022106.1	11.04	9.86	-1.19	14.47
ILMN_1677466	DUSP6	dual specificity phosphatase 6 (DUSP6), transcript variant 1, mRNA.	NM_001946.2	6.98	8.86	1.88	14.42
ILMN_2121408	HBEGF	heparin-binding EGF-like growth factor (HBEGF), mRNA.	NM_001945.1	8.38	9.84	1.46	14.42
ILMN_1651347	SERTAD2	SERTA domain containing 2 (SERTAD2), mRNA.	NM_014755.1	10.68	9.6	-1.08	14.42
ILMN_1688480	CCND1	cyclin D1 (CCND1), mRNA.	NM_053056.2	13.16	14.28	1.12	14.41
ILMN_1701424	LAMC2	laminin, gamma 2 (LAMC2), transcript variant 1, mRNA.	NM_005562.1	11.44	12.63	1.19	14.4
ILMN_1864372		BX097797 Soares_pregnant_uterus_NbHPU cDNA clone IMAGp998N171164, mRNA sequence		7.9	9.47	1.57	14.24
ILMN_1695290	FERMT2	fermitin family homolog 2 (Drosophila) (FERMT2), mRNA.	NM_006832.1	8.52	9.84	1.33	14.23
ILMN_1874689		primary neuroblastoma cDNA, clone:Nbla10527, full insert sequence		10.09	11.5	1.41	14.19
ILMN_2052208	GADD45A	growth arrest and DNA-damage-inducible, alpha (GADD45A), mRNA.	NM_001924.2	10.44	11.57	1.13	14.19
ILMN_1737611	VAMP1	vesicle-associated membrane protein 1 (synaptobrevin 1) (VAMP1), transcript variant 2, mRNA.	NM_199245.1	9.58	8.44	-1.14	14.16
ILMN_1677511	PTGS2	prostaglandin-endoperoxide synthase 2 (prostaglandin G/H synthase and cyclooxygenase) (PTGS2), mRNA.	NM_000963.1	6.49	7.91	1.43	14.13
ILMN_1688892	LAMA3	laminin, alpha 3 (LAMA3), transcript variant 1, mRNA.	NM_198129.1	10.16	11.61	1.45	14.09
ILMN_1743619	NEDD9	neural precursor cell expressed, developmentally down-regulated 9 (NEDD9), transcript variant 2, mRNA.	NM_182966.2	6.51	7.85	1.34	14.07
ILMN_1724040	ANKRD57	ankyrin repeat domain 57 (ANKRD57), mRNA.	NM_023016.3	11.22	12.32	1.1	14.04
ILMN_1658483	IL1A	interleukin 1, alpha (IL1A), mRNA.	NM_000575.3	7.5	9.04	1.54	14.02
ILMN_1664016	ARHGEF18	rho/rac guanine nucleotide exchange factor (GEF) 18 (ARHGEF18), mRNA.	NM_015318.2	11.52	12.5	0.99	14.01
ILMN_1661197	CLCF1	cardiotrophin-like cytokine factor 1 (CLCF1), mRNA.	NM_013246.2	8.05	9.5	1.45	13.92
ILMN_1788203	HEY1	hairy/enhancer-of-split related with YRPW motif 1 (HEY1), transcript variant 2, mRNA.	NM_001040708.1	7.81	9.14	1.33	13.91
ILMN_1758311	NET1	neuroepithelial cell transforming gene 1 (NET1), transcript variant 1, mRNA.	NM_001047160.1	12.51	13.75	1.23	13.89
ILMN_1715684	LAMB3	laminin, beta 3 (LAMB3), transcript variant 1, mRNA.	NM_000228.2	12.16	13.25	1.09	13.8
ILMN_1671005	IRF2BP2	interferon regulatory factor 2 binding protein 2 (IRF2BP2), transcript variant 1, mRNA.	NM_182972.2	8.16	9.58	1.42	13.73
ILMN_2151281	GABARAPL1	GABA(A) receptor-associated protein like 1 (GABARAPL1), mRNA.	NM_031412.2	8.54	10.17	1.64	13.71
ILMN_2188722	GLS	glutaminase (GLS), mRNA.	NM_014905.2	9.51	10.65	1.14	13.71
ILMN_1686116	THBS1	thrombospondin 1 (THBS1), mRNA.	NM_003246.2	11.77	13.66	1.89	13.57
ILMN_1767322	EDAR	ectodysplasin A receptor (EDAR), mRNA.	NM_022336.2	7.8	9.33	1.53	13.57
ILMN_1722718	BMP2	bone morphogenetic protein 2 (BMP2), mRNA.	NM_001200.2	7.93	9.13	1.2	13.54
ILMN_2315979	LBH	limb bud and heart development homolog (mouse) (LBH), mRNA.	NM_030915.1	7.6	9.08	1.48	13.25
ILMN_1732609	KIAA1539	KIAA1539 (KIAA1539), mRNA.	NM_025182.2	7.02	8.65	1.63	13.21
ILMN_2371458	CXCR7	chemokine (C-X-C motif) receptor 7 (CXCR7), transcript variant 1, mRNA.	NM_001047841.1	9.33	10.71	1.37	13.21
ILMN_1712896	FST	follistatin (FST), transcript variant FST317, mRNA.	NM_006350.2	9.31	10.89	1.57	13.16
ILMN_1805192	KIAA1754	KIAA1754 (KIAA1754), mRNA.	NM_033397.2	10.03	11.13	1.1	13.07
ILMN_1801068	DACT1	dapper, antagonist of beta-catenin, homolog 1 (Xenopus laevis) (DACT1), mRNA.	NM_016651.4	5.93	7.46	1.52	13.06
ILMN_1718607	TSPAN4	tetraspanin 4 (TSPAN4), transcript variant 3, mRNA.	NM_001025235.1	8.79	10.12	1.33	12.73
ILMN_1687978	PHLDA1	pleckstrin homology-like domain, family A, member 1 (PHLDA1), mRNA.	NM_007350.3	11.08	12.83	1.75	12.67
ILMN_1765578	TIPARP	TCDD-inducible poly(ADP-ribose) polymerase (TIPARP), mRNA.	NM_015508.3	10.34	11.56	1.22	12.64
ILMN_1680018	RIPK4	receptor-interacting serine-threonine kinase 4 (RIPK4), mRNA.	NM_020639.2	9.06	7.9	-1.16	12.57
ILMN_1680139	MAFF	v-maf musculoaponeurotic fibrosarcoma oncogene homolog F (avian) (MAFF), transcript variant 1, mRNA.	NM_012323.2	6.57	7.7	1.14	12.52
ILMN_1794501	HAS3	hyaluronan synthase 3 (HAS3), transcript variant 1, mRNA.	NM_005329.2	8.46	9.95	1.49	12.32
ILMN_1677636	COMP	cartilage oligomeric matrix protein (COMP), mRNA.	NM_000095.2	5.75	7.12	1.36	12.32
ILMN_1759598	DLX5	distal-less homeobox 5 (DLX5), mRNA.	NM_005221.5	7.38	8.49	1.11	12.32
ILMN_1733937	MMD	monocyte to macrophage differentiation-associated (MMD), mRNA.	NM_012329.2	7.35	8.79	1.44	12.31
ILMN_1712545	S100A3	S100 calcium binding protein A3 (S100A3), mRNA.	NM_002960.1	10.1	11.18	1.09	12.28
ILMN_1811468	IRX3	iroquois homeobox 3 (IRX3), mRNA.	NM_024336.1	13.02	12.12	-0.9	12.26
ILMN_1743456	ZCCHC14	zinc finger, CCHC domain containing 14 (ZCCHC14), mRNA.	NM_015144.2	9.86	10.94	1.08	12.14
ILMN_1665792	ITGA2	integrin, alpha 2 (CD49B, alpha 2 subunit of VLA-2 receptor) (ITGA2), mRNA.	NM_002203.3	9.92	11.38	1.47	12.11
ILMN_1849033		Homo sapiens, clone IMAGE:5403381, mRNA		6.59	7.78	1.19	12.03
ILMN_1743373	DLL1	delta-like 1 (Drosophila) (DLL1), mRNA.	NM_005618.3	8.88	7.77	-1.11	11.97
ILMN_1794017	SERTAD1	SERTA domain containing 1 (SERTAD1), mRNA.	NM_013376.3	9.59	10.54	0.95	11.91
ILMN_1798360	CXCR7	chemokine (C-X-C motif) receptor 7 (CXCR7), mRNA.	NM_020311.2	11.47	12.65	1.18	11.87
ILMN_1658094	ZNF365	zinc finger protein 365 (ZNF365), transcript variant A, mRNA.	NM_014951.2	9.62	10.81	1.19	11.86
ILMN_1670926	GALNAC4S-6ST	B cell RAG associated protein (GALNAC4S-6ST), mRNA.	NM_015892.2	10.23	11.32	1.09	11.85
ILMN_1718977	GADD45B	growth arrest and DNA-damage-inducible, beta (GADD45B), mRNA.	NM_015675.2	7.01	8.32	1.31	11.84
ILMN_1810000	RDH16	retinol dehydrogenase 16 (all-trans) (RDH16), mRNA.	NM_003708.3	6.26	7.85	1.59	11.78
ILMN_1722834	RGS12	regulator of G-protein signaling 12 (RGS12), transcript variant 2, mRNA.	NM_002926.3	9.73	10.76	1.02	11.78
ILMN_1673113	F2RL1	coagulation factor II (thrombin) receptor-like 1 (F2RL1), mRNA.	NM_005242.3	9.61	10.58	0.98	11.77
ILMN_2318638	TGIF1	TGFB-induced factor homeobox 1 (TGIF1), transcript variant 1, mRNA.	NM_170695.2	9.48	10.54	1.06	11.72
ILMN_2199389	VIPR1	vasoactive intestinal peptide receptor 1 (VIPR1), mRNA.	NM_004624.2	7.86	9.1	1.24	11.69
ILMN_1717877	IVNS1ABP	influenza virus NS1A binding protein (IVNS1ABP), mRNA.	NM_006469.4	9.17	10.95	1.78	11.64
ILMN_1796316	MMP9	matrix metallopeptidase 9 (gelatinase B, 92kDa gelatinase, 92kDa type IV collagenase) (MMP9), mRNA.	NM_004994.2	6.21	7.73	1.52	11.59
ILMN_1682034	HEY2	hairy/enhancer-of-split related with YRPW motif 2 (HEY2), mRNA.	NM_012259.1	6.15	7.21	1.07	11.58
ILMN_1745623	EFCAB4A	EF-hand calcium binding domain 4A (EFCAB4A), mRNA.	NM_173584.3	8.69	9.66	0.97	11.57
ILMN_1805466	SOX9	SRY (sex determining region Y)-box 9 (campomelic dysplasia, autosomal sex-reversal) (SOX9), mRNA.	NM_000346.2	8.67	10.48	1.81	11.52
ILMN_1753143	RHPN2	rhophilin, Rho GTPase binding protein 2 (RHPN2), mRNA.	NM_033103.3	10.07	11.24	1.16	11.52
ILMN_1707727	ANGPTL4	angiopoietin-like 4 (ANGPTL4), transcript variant 1, mRNA.	NM_139314.1	6.89	8.55	1.66	11.46
ILMN_1657679	VAV3	vav 3 guanine nucleotide exchange factor (VAV3), transcript variant 1, mRNA.	NM_006113.4	9.23	7.53	-1.71	11.46
ILMN_1689037	LIPG	lipase, endothelial (LIPG), mRNA.	NM_006033.2	10	11.29	1.28	11.44
ILMN_1753370	ABTB2	ankyrin repeat and BTB (POZ) domain containing 2 (ABTB2), mRNA.	NM_145804.1	6.56	8.02	1.46	11.41
ILMN_2374340	PLAUR	plasminogen activator, urokinase receptor (PLAUR), transcript variant 2, mRNA.	NM_001005376.1	7.83	9.07	1.24	11.4
ILMN_2414325	TNFAIP8	tumor necrosis factor, alpha-induced protein 8 (TNFAIP8), transcript variant 2, mRNA.	NM_001077654.1	8.9	9.97	1.07	11.4
ILMN_1709067	SAMD11	sterile alpha motif domain containing 11 (SAMD11), mRNA.	NM_152486.2	6.04	7.35	1.31	11.36
ILMN_1769201	ELF3	E74-like factor 3 (ets domain transcription factor, epithelial-specific ) (ELF3), mRNA.	NM_004433.3	8.85	7.53	-1.31	11.35
ILMN_1753613	HOXA5	homeobox A5 (HOXA5), mRNA.	NM_019102.2	11.12	10.26	-0.86	11.29
ILMN_1692748	BNC1	basonuclin 1 (BNC1), mRNA.	NM_001717.2	7.79	9.29	1.5	11.17
ILMN_1685574	TSC22D2	TSC22 domain family, member 2 (TSC22D2), mRNA.	NM_014779.2	8.53	9.9	1.37	11.1
ILMN_1787567	TSC22D1	TSC22 domain family, member 1 (TSC22D1), transcript variant 2, mRNA.	NM_006022.2	11.62	12.64	1.01	11.09
ILMN_2041190	F2RL1	coagulation factor II (thrombin) receptor-like 1 (F2RL1), mRNA.	NM_005242.3	10.68	11.63	0.95	11.09
ILMN_1784661	TMEM2	transmembrane protein 2 (TMEM2), mRNA.	NM_013390.1	9.03	10.21	1.17	11.07
ILMN_1794598	SCHIP1	schwannomin interacting protein 1 (SCHIP1), mRNA.	NM_014575.2	9.39	10.4	1.01	11.07
ILMN_1808391	DUSP4	dual specificity phosphatase 4 (DUSP4), transcript variant 1, mRNA.	NM_001394.5	6.49	7.67	1.18	10.96
ILMN_1801504	RUNX1	runt-related transcription factor 1 (acute myeloid leukemia 1; aml1 oncogene) (RUNX1), transcript variant 1, mRNA.	NM_001754.3	9.91	10.91	1	10.9
ILMN_1699265	TNFRSF10B	tumor necrosis factor receptor superfamily, member 10b (TNFRSF10B), transcript variant 1, mRNA.	NM_003842.3	9.69	10.68	0.99	10.84
ILMN_1694767	LOC652688	PREDICTED: similar to Zinc finger protein basonuclin-1 (LOC652688), mRNA.	XM_942297.1	7.72	9.23	1.51	10.82
ILMN_1872032		AGENCOURT_10400346 NIH_MGC_82 cDNA clone IMAGE:6616124 5, mRNA sequence		7.18	8.09	0.9	10.65
ILMN_1763638	BCAR3	breast cancer anti-estrogen resistance 3 (BCAR3), mRNA.	NM_003567.2	10.68	11.78	1.1	10.56
ILMN_2371055	EFNA1	ephrin-A1 (EFNA1), transcript variant 1, mRNA.	NM_004428.2	12.31	11.4	-0.91	10.56
ILMN_1660451	STARD13	START domain containing 13 (STARD13), transcript variant delta, mRNA.	NM_178008.1	8.11	9.12	1.01	10.52
ILMN_2396020	DUSP6	dual specificity phosphatase 6 (DUSP6), transcript variant 2, mRNA.	NM_022652.2	8.36	10.1	1.74	10.48
ILMN_1665510	ERRFI1	ERBB receptor feedback inhibitor 1 (ERRFI1), mRNA.	NM_018948.2	9.69	10.9	1.2	10.47
ILMN_1694075	GADD45A	growth arrest and DNA-damage-inducible, alpha (GADD45A), mRNA.	NM_001924.2	8.93	10.14	1.21	10.46
ILMN_1780861	LOC653506	PREDICTED: similar to meteorin, glial cell differentiation regulator-like (LOC653506), mRNA.	XM_927769.1	9.44	10.44	1	10.46
ILMN_1790338	PRRX2	paired related homeobox 2 (PRRX2), mRNA.	NM_016307.3	5.89	7.13	1.24	10.44
ILMN_2086105	SPRY4	sprouty homolog 4 (Drosophila) (SPRY4), mRNA.	NM_030964.2	6.33	7.33	1	10.41
ILMN_2308849	MYADM	myeloid-associated differentiation marker (MYADM), transcript variant 4, mRNA.	NM_001020820.1	10.58	11.69	1.11	10.31
ILMN_1803811	TRIB1	tribbles homolog 1 (Drosophila) (TRIB1), mRNA.	NM_025195.2	9.89	10.99	1.11	10.31
ILMN_1715133	IVNS1ABP	influenza virus NS1A binding protein (IVNS1ABP), transcript variant 2, mRNA.	NM_016389.2	6.72	8.02	1.3	10.27
ILMN_1653824	LAMC2	laminin, gamma 2 (LAMC2), transcript variant 1, mRNA.	NM_005562.1	9.3	10.93	1.63	10.1
ILMN_1666819	PHLDB1	pleckstrin homology-like domain, family B, member 1 (PHLDB1), mRNA.	NM_015157.1	10.67	11.63	0.96	9.98
ILMN_1695604	DCBLD1	discoidin, CUB and LCCL domain containing 1 (DCBLD1), mRNA.	NM_173674.1	9.24	10.49	1.25	9.97
ILMN_1751785	DMRT2	doublesex and mab-3 related transcription factor 2 (DMRT2), transcript variant 1, mRNA.	NM_006557.4	8.31	7.15	-1.17	9.89
ILMN_1712684	FAM20C	family with sequence similarity 20, member C (FAM20C), mRNA.	NM_020223.2	8.13	9.22	1.09	9.86
ILMN_1662188	WNT11	wingless-type MMTV integration site family, member 11 (WNT11), mRNA.	NM_004626.2	5.87	6.99	1.12	9.78
ILMN_2124187	TSC22D2	TSC22 domain family, member 2 (TSC22D2), mRNA.	NM_014779.2	9.88	10.96	1.09	9.78
ILMN_1894911		cDNA FLJ45933 fis, clone PLACE7003639		5.92	6.83	0.91	9.78
ILMN_2397750	IVNS1ABP	influenza virus NS1A binding protein (IVNS1ABP), mRNA.	NM_006469.4	8.95	10.78	1.84	9.76
ILMN_1855278		EST366269 MAGE resequences, MAGC cDNA, mRNA sequence		8.12	9.31	1.18	9.75
ILMN_1671557	PHLDA2	pleckstrin homology-like domain, family A, member 2 (PHLDA2), mRNA.	NM_003311.3	7.87	8.86	0.99	9.75
ILMN_1800540	CD55	CD55 molecule, decay accelerating factor for complement (Cromer blood group) (CD55), mRNA.	NM_000574.2	9.09	10.24	1.15	9.52
ILMN_1694268	HES6	hairy and enhancer of split 6 (Drosophila) (HES6), mRNA.	NM_018645.3	8.1	9.23	1.13	9.5
ILMN_2342695	PDGFA	platelet-derived growth factor alpha polypeptide (PDGFA), transcript variant 2, mRNA.	NM_033023.3	8.4	9.88	1.48	9.49
ILMN_2372915	P2RY2	purinergic receptor P2Y, G-protein coupled, 2 (P2RY2), transcript variant 2, mRNA.	NM_002564.2	8.32	9.57	1.26	9.49
ILMN_1748970	ATAD4	ATPase family, AAA domain containing 4 (ATAD4), mRNA.	NM_024320.2	8.79	7.6	-1.2	9.49
ILMN_2399300	NAV2	neuron navigator 2 (NAV2), transcript variant 2, mRNA.	NM_145117.3	8.33	9.4	1.07	9.46
ILMN_1724832	OVOL2	ovo-like 2 (Drosophila) (OVOL2), mRNA.	NM_021220.2	10.5	11.21	0.72	9.44
ILMN_2137789	KLF4	Kruppel-like factor 4 (gut) (KLF4), mRNA.	NM_004235.3	8.99	9.94	0.95	9.39
ILMN_1679782	BLOC1S2	biogenesis of lysosome-related organelles complex-1, subunit 2 (BLOC1S2), transcript variant 2, mRNA.	NM_001001342.1	7.05	8.09	1.04	9.37
ILMN_2374115	TFAP2A	transcription factor AP-2 alpha (activating enhancer binding protein 2 alpha) (TFAP2A), transcript variant 2, mRNA.	NM_001032280.2	9.6	8.67	-0.93	9.37
ILMN_1771841	FOSL1	FOS-like antigen 1 (FOSL1), mRNA.	NM_005438.2	7.98	9.29	1.31	9.36
ILMN_1764709	MAFB	v-maf musculoaponeurotic fibrosarcoma oncogene homolog B (avian) (MAFB), mRNA.	NM_005461.3	7.21	8.66	1.45	9.17
ILMN_1736760	KRT16	keratin 16 (focal non-epidermolytic palmoplantar keratoderma) (KRT16), mRNA.	NM_005557.2	7.95	9.07	1.12	9.09
ILMN_1750748	MGC102966	PREDICTED: similar to Keratin, type I cytoskeletal 16 (Cytokeratin-16) (CK-16) (Keratin-16) (K16) (MGC102966), misc RNA.	XR_015970.1	8.82	10.03	1.22	9.07
ILMN_1670111	CDKN2B	cyclin-dependent kinase inhibitor 2B (p15, inhibits CDK4) (CDKN2B), transcript variant 2, mRNA.	NM_078487.2	5.96	7.24	1.28	9.03
ILMN_2397521	JMJD3	jumonji domain containing 3, histone lysine demethylase (JMJD3), mRNA.	NM_001080424.1	6.13	7.29	1.16	9
ILMN_2380566	SIAH1	seven in absentia homolog 1 (Drosophila) (SIAH1), transcript variant 2, mRNA.	NM_001006610.1	9.36	10.18	0.82	9
ILMN_1747078	HYLS1	hydrolethalus syndrome 1 (HYLS1), mRNA.	NM_145014.1	9.45	8.61	-0.83	8.99
ILMN_1793729	C15orf39	chromosome 15 open reading frame 39 (C15orf39), mRNA.	NM_015492.4	7.02	8.22	1.2	8.93
ILMN_1656826	SH3RF1	SH3 domain containing ring finger 1 (SH3RF1), mRNA.	NM_020870.3	8.2	9.6	1.4	8.89
ILMN_1700081	FST	follistatin (FST), transcript variant FST344, mRNA.	NM_013409.1	12.35	13.33	0.98	8.83
ILMN_1703123	AXUD1	AXIN1 up-regulated 1 (AXUD1), mRNA.	NM_033027.2	8.37	9.17	0.8	8.78
ILMN_1679464	BNC1	basonuclin 1 (BNC1), mRNA.	NM_001717.2	7.52	8.64	1.13	8.76
ILMN_1710284	HES1	hairy and enhancer of split 1, (Drosophila) (HES1), mRNA.	NM_005524.2	7.38	6.45	-0.94	8.75
ILMN_2226917	KIAA0247	KIAA0247 (KIAA0247), mRNA.	NM_014734.2	8.46	9.61	1.14	8.68
ILMN_2318643	TGIF1	TGFB-induced factor homeobox 1 (TGIF1), transcript variant 1, mRNA.	NM_170695.2	8.63	9.75	1.12	8.61
ILMN_1657870	ABL2	v-abl Abelson murine leukemia viral oncogene homolog 2 (arg, Abelson-related gene) (ABL2), transcript variant a, mRNA.	NM_005158.3	6.61	7.91	1.3	8.6
ILMN_2365465	XBP1	X-box binding protein 1 (XBP1), transcript variant 2, mRNA.	NM_001079539.1	11.96	12.65	0.69	8.55
ILMN_1651365	ZBED2	zinc finger, BED-type containing 2 (ZBED2), mRNA.	NM_024508.3	10.6	11.44	0.85	8.48
ILMN_1722781	EGR3	early growth response 3 (EGR3), mRNA.	NM_004430.2	6.1	7.23	1.14	8.44
ILMN_1654518	LRCH4	leucine-rich repeats and calponin homology (CH) domain containing 4 (LRCH4), mRNA.	NM_002319.2	8.93	7.95	-0.98	8.37
ILMN_1652762	HIC2	hypermethylated in cancer 2 (HIC2), mRNA.	NM_015094.2	9.42	8.57	-0.85	8.36
ILMN_1743933	TSHZ3	teashirt zinc finger homeobox 3 (TSHZ3), mRNA.	NM_020856.2	6.4	7.56	1.16	8.31
ILMN_1696585	FERMT1	fermitin family homolog 1 (Drosophila) (FERMT1), mRNA.	NM_017671.4	11.25	12.21	0.96	8.3
ILMN_2183938	LEMD3	LEM domain containing 3 (LEMD3), mRNA.	NM_014319.3	10.85	11.7	0.85	8.25
ILMN_2150654	ZSWIM4	zinc finger, SWIM-type containing 4 (ZSWIM4), mRNA.	NM_023072.1	8.19	8.91	0.71	8.15
ILMN_1839481		cDNA FLJ37828 fis, clone BRSSN2006575		7.45	6.51	-0.93	8.15
ILMN_1838942		we85a04.x1 Soares_NFL_T_GBC_S1 cDNA clone IMAGE:2347854 3, mRNA sequence		7.62	6.57	-1.05	8.15
ILMN_1806328	PDIK1L	PDLIM1 interacting kinase 1 like (PDIK1L), mRNA.	NM_152835.2	8.65	7.48	-1.17	8.13
ILMN_1708041	PLEKHF1	pleckstrin homology domain containing, family F (with FYVE domain) member 1 (PLEKHF1), mRNA.	NM_024310.4	9.25	8.37	-0.88	8.04
ILMN_1703955	FBXO32	F-box protein 32 (FBXO32), transcript variant 2, mRNA.	NM_148177.1	8.93	7.97	-0.95	8.04
ILMN_2214678	MXD1	MAX dimerization protein 1 (MXD1), mRNA.	NM_002357.2	8.59	9.51	0.92	8.02
ILMN_2403852	PSCD1	pleckstrin homology, Sec7 and coiled-coil domains 1(cytohesin 1) (PSCD1), transcript variant 2, mRNA.	NM_017456.2	7.03	8.11	1.08	8.01
ILMN_2374249	DYRK2	dual-specificity tyrosine-(Y)-phosphorylation regulated kinase 2 (DYRK2), transcript variant 1, mRNA.	NM_003583.2	9.41	10.17	0.76	7.96
ILMN_1759513	RND3	Rho family GTPase 3 (RND3), mRNA.	NM_005168.3	10.04	11.11	1.07	7.93
ILMN_2391976	SLC45A4	solute carrier family 45, member 4 (SLC45A4), mRNA.	NM_001080431.1	6.53	7.42	0.89	7.87
ILMN_1790014	METRNL	PREDICTED: meteorin, glial cell differentiation regulator-like (METRNL), mRNA.	XM_941466.2	7.21	8.23	1.02	7.83
ILMN_1801610	METRNL	PREDICTED: meteorin, glial cell differentiation regulator-like (METRNL), mRNA.	XM_941466.2	6.95	7.86	0.9	7.83
ILMN_1718968	MT1E	metallothionein 1E (functional) (MT1E), mRNA.	NM_175617.2	7.34	6.52	-0.82	7.8
ILMN_1688775	METRNL	PREDICTED: meteorin, glial cell differentiation regulator-like (METRNL), mRNA.	XM_941466.2	8.4	9.31	0.91	7.79
ILMN_1738989	GOLSYN	Golgi-localized protein (GOLSYN), transcript variant 7, mRNA.	NM_001099743.1	9.71	8.86	-0.85	7.77
ILMN_1797009	F3	coagulation factor III (thromboplastin, tissue factor) (F3), mRNA.	NM_001993.2	8.74	9.8	1.05	7.7
ILMN_1755954	CPEB3	cytoplasmic polyadenylation element binding protein 3 (CPEB3), mRNA.	NM_014912.3	8.93	7.71	-1.22	7.67
ILMN_1713813	LOC400578	PREDICTED: similar to Keratin, type I cytoskeletal 14 (Cytokeratin-14) (CK-14) (Keratin-14) (K14) (LOC400578), mRNA.	XR_017543.1	8.55	9.61	1.06	7.63
ILMN_1780255	KLK6	kallikrein-related peptidase 6 (KLK6), transcript variant B, mRNA.	NM_001012964.1	8.86	9.68	0.81	7.62
ILMN_1729417	GNE	glucosamine (UDP-N-acetyl)-2-epimerase/N-acetylmannosamine kinase (GNE), mRNA.	NM_005476.3	8.53	7.45	-1.08	7.61
ILMN_1778575	WNT7A	wingless-type MMTV integration site family, member 7A (WNT7A), mRNA.	NM_004625.3	8.09	8.98	0.89	7.6
ILMN_1652082	ELF4	E74-like factor 4 (ets domain transcription factor) (ELF4), mRNA.	NM_001421.2	10.61	11.44	0.83	7.58
ILMN_2394561	IRF2BP2	interferon regulatory factor 2 binding protein 2 (IRF2BP2), transcript variant 1, mRNA.	NM_182972.2	8.4	9.29	0.88	7.55
ILMN_1689004	TNFRSF12A	tumor necrosis factor receptor superfamily, member 12A (TNFRSF12A), mRNA.	NM_016639.1	11	12.14	1.14	7.53
ILMN_1757736	IRX5	iroquois homeobox 5 (IRX5), mRNA.	NM_005853.5	9.69	8.81	-0.88	7.53
ILMN_1726153	MGC4677	PREDICTED: hypothetical protein MGC4677 (MGC4677), mRNA.	XM_939115.1	6.72	7.66	0.93	7.51
ILMN_1695590	ADRB2	adrenergic, beta-2-, receptor, surface (ADRB2), mRNA.	NM_000024.4	8.92	7.99	-0.92	7.46
ILMN_1757237	DDEF2	development and differentiation enhancing factor 2 (DDEF2), mRNA.	NM_003887.1	9.26	10.33	1.07	7.41
ILMN_2129572	F3	coagulation factor III (thromboplastin, tissue factor) (F3), mRNA.	NM_001993.2	11.1	11.96	0.86	7.38
ILMN_1711627	SIAH1	seven in absentia homolog 1 (Drosophila) (SIAH1), transcript variant 2, mRNA.	NM_001006610.1	11.34	12.13	0.79	7.38
ILMN_1775016	MPZL2	myelin protein zero-like 2 (MPZL2), transcript variant 2, mRNA.	NM_144765.1	9.17	8.4	-0.77	7.38
ILMN_2402416	DNAJB6	DnaJ (Hsp40) homolog, subfamily B, member 6 (DNAJB6), transcript variant 2, mRNA.	NM_005494.2	10.57	11.33	0.76	7.26
ILMN_1773417	AKR1C2	PREDICTED: aldo-keto reductase family 1, member C2 (dihydrodiol dehydrogenase 2; bile acid binding protein; 3-alpha hydroxysteroid dehydrogenase, type III), transcript variant 4 (AKR1C2), mRNA.	XM_943415.1	7.65	6.61	-1.04	7.24
ILMN_1718766	MT1F	metallothionein 1F (MT1F), mRNA.	NM_005949.2	11.45	10.78	-0.67	7.13
ILMN_2128639	C10orf47	chromosome 10 open reading frame 47 (C10orf47), mRNA.	NM_153256.2	8.39	9.35	0.96	7.11
ILMN_1775822	PDGFB	platelet-derived growth factor beta polypeptide (simian sarcoma viral (v-sis) oncogene homolog) (PDGFB), transcript variant 1, mRNA.	NM_002608.1	6.54	7.49	0.95	7.09
ILMN_2044453	LPAR5	lysophosphatidic acid receptor 5 (LPAR5), mRNA.	NM_020400.4	9.59	10.3	0.71	7.04
ILMN_1717639	SNF1LK	SNF1-like kinase (SNF1LK), mRNA.	NM_173354.3	7.32	8.18	0.86	6.88
ILMN_1692936	OVOL1	ovo-like 1(Drosophila) (OVOL1), mRNA.	NM_004561.2	6.43	7.28	0.86	6.86
ILMN_1687721	PROC	protein C (inactivator of coagulation factors Va and VIIIa) (PROC), mRNA.	NM_000312.1	7.12	7.94	0.83	6.85
ILMN_1770850	PNMA1	paraneoplastic antigen MA1 (PNMA1), mRNA.	NM_006029.4	8	8.97	0.98	6.84
ILMN_1711087	LOC648526	PREDICTED: similar to epiplakin 1 (LOC648526), mRNA.	XM_937579.1	7.86	8.79	0.93	6.8
ILMN_2196347	CDKN1B	cyclin-dependent kinase inhibitor 1B (p27, Kip1) (CDKN1B), mRNA.	NM_004064.2	9.71	8.89	-0.82	6.8
ILMN_1899317		BX118287 Soares placenta Nb2HP cDNA clone IMAGp998N04207, mRNA sequence		7.23	6.28	-0.95	6.76
ILMN_1748206	C20orf160	chromosome 20 open reading frame 160 (C20orf160), mRNA.	NM_080625.2	5.77	6.42	0.65	6.73
ILMN_1705442	CMTM3	CKLF-like MARVEL transmembrane domain containing 3 (CMTM3), transcript variant 1, mRNA.	NM_144601.2	8.54	9.28	0.74	6.71
ILMN_2133100	LPIN2	lipin 2 (LPIN2), mRNA.	NM_014646.2	7.48	8.41	0.93	6.65
ILMN_1900110		BX099724 Soares_fetal_liver_spleen_1NFLS_S1 cDNA clone IMAGp998F201004, mRNA sequence		6.6	7.5	0.89	6.6
ILMN_2228938	ECM2	extracellular matrix protein 2, female organ and adipocyte specific (ECM2), mRNA.	NM_001393.2	9.04	8.31	-0.73	6.51
ILMN_1751243	OSBPL7	oxysterol binding protein-like 7 (OSBPL7), transcript variant 1, mRNA.	NM_145798.2	6.58	7.72	1.15	6.5
ILMN_1720771	STX11	syntaxin 11 (STX11), mRNA.	NM_003764.2	6.63	7.43	0.8	6.5
ILMN_1723124	GALK2	galactokinase 2 (GALK2), transcript variant 2, mRNA.	NM_001001556.1	9.1	8.34	-0.76	6.5
ILMN_1678087	MAP3K4	mitogen-activated protein kinase kinase kinase 4 (MAP3K4), transcript variant 1, mRNA.	NM_005922.2	10.09	10.78	0.7	6.35
ILMN_1745256	CXXC5	CXXC finger 5 (CXXC5), mRNA.	NM_016463.5	10.4	11.06	0.66	6.32
ILMN_1804007	NANOS3	nanos homolog 3 (Drosophila) (NANOS3), mRNA.	NM_001098622.1	6.64	7.46	0.82	6.29
ILMN_1770537	NGFRAP1	nerve growth factor receptor (TNFRSF16) associated protein 1 (NGFRAP1), transcript variant 3, mRNA.	NM_014380.1	8.04	7.14	-0.89	6.28
ILMN_2197365	RGS2	regulator of G-protein signalling 2, 24kDa (RGS2), mRNA.	NM_002923.1	9.51	8.59	-0.92	6.24
ILMN_2399463	VAV3	vav 3 guanine nucleotide exchange factor (VAV3), transcript variant 1, mRNA.	NM_006113.4	7.2	6.07	-1.13	6.24
ILMN_1779147	ENC1	ectodermal-neural cortex (with BTB-like domain) (ENC1), mRNA.	NM_003633.1	7.86	9.16	1.31	6.23
ILMN_2046470	DAAM1	dishevelled associated activator of morphogenesis 1 (DAAM1), mRNA.	NM_014992.1	11.24	12.31	1.07	6.22
ILMN_1746763	ECM2	extracellular matrix protein 2, female organ and adipocyte specific (ECM2), mRNA.	NM_001393.2	7.58	6.82	-0.76	6.22
ILMN_1756806	MCL1	myeloid cell leukemia sequence 1 (BCL2-related) (MCL1), transcript variant 1, mRNA.	NM_021960.3	9.11	9.97	0.86	6.21
ILMN_2314169	PTHLH	parathyroid hormone-like hormone (PTHLH), transcript variant 1, mRNA.	NM_198965.1	12.7	13.4	0.7	6.21
ILMN_1750338	C10orf47	chromosome 10 open reading frame 47 (C10orf47), mRNA.	NM_153256.2	7.44	8.33	0.89	6.1
ILMN_1772686	FGD3	FYVE, RhoGEF and PH domain containing 3 (FGD3), transcript variant 2, mRNA.	NM_033086.2	8.28	7.46	-0.82	6.08
ILMN_2195821	C5orf41	chromosome 5 open reading frame 41 (C5orf41), mRNA.	NM_153607.1	8.41	7.42	-0.99	6.08
ILMN_1739428	IFIT2	interferon-induced protein with tetratricopeptide repeats 2 (IFIT2), mRNA.	NM_001547.4	9.77	8.8	-0.97	6.05
ILMN_2408683	PPAP2B	phosphatidic acid phosphatase type 2B (PPAP2B), transcript variant 2, mRNA.	NM_177414.1	6.46	7.3	0.84	6.03
ILMN_1666392	WNT4	wingless-type MMTV integration site family, member 4 (WNT4), mRNA.	NM_030761.3	6.35	7.25	0.9	6.02
ILMN_1663976	PDLIM4	PDZ and LIM domain 4 (PDLIM4), mRNA.	NM_003687.2	6.5	7.29	0.8	6.02
ILMN_1782412	IRX2	iroquois homeobox 2 (IRX2), mRNA.	NM_033267.3	9.98	9.38	-0.61	6.02
ILMN_1697448	TXNIP	thioredoxin interacting protein (TXNIP), mRNA.	NM_006472.2	11.2	10.31	-0.89	5.96
ILMN_1680987	HAND1	heart and neural crest derivatives expressed 1 (HAND1), mRNA.	NM_004821.1	6.1	6.9	0.8	5.94
ILMN_1790228	FURIN	furin (paired basic amino acid cleaving enzyme) (FURIN), mRNA.	NM_002569.2	7.08	7.8	0.72	5.94
ILMN_2094396	LRRC8C	leucine rich repeat containing 8 family, member C (LRRC8C), mRNA.	NM_032270.2	7.81	8.93	1.12	5.92
ILMN_1785699	PTHLH	parathyroid hormone-like hormone (PTHLH), transcript variant 3, mRNA.	NM_198964.1	11.72	12.32	0.6	5.89
ILMN_1811470	PLEK2	pleckstrin 2 (PLEK2), mRNA.	NM_016445.1	10.18	10.97	0.79	5.77
ILMN_1718671	GJB6	gap junction protein, beta 6 (GJB6), mRNA.	NM_006783.2	6.01	6.72	0.71	5.76
ILMN_1914612		DA199814 BRAWH2 cDNA clone BRAWH2003556 5, mRNA sequence		6.73	7.93	1.2	5.65
ILMN_1669390	PPP1R13L	protein phosphatase 1, regulatory (inhibitor) subunit 13 like (PPP1R13L), mRNA.	NM_006663.2	8.84	9.73	0.89	5.65
ILMN_1728230	ZNF30	zinc finger protein 30 (ZNF30), transcript variant 2, mRNA.	NM_001099437.1	8.18	7.37	-0.81	5.61
ILMN_1799579	CCDC51	coiled-coil domain containing 51 (CCDC51), mRNA.	NM_024661.3	9.06	8.22	-0.84	5.49
ILMN_1712708	TRIM47	tripartite motif-containing 47 (TRIM47), mRNA.	NM_033452.2	7.64	8.74	1.1	5.44
ILMN_1746676	CLDN8	claudin 8 (CLDN8), mRNA.	NM_199328.1	8.72	7.81	-0.9	5.44
ILMN_1714710	CCDC120	coiled-coil domain containing 120 (CCDC120), mRNA.	NM_033626.2	10.02	10.56	0.54	5.42
ILMN_2371053	EFNA1	ephrin-A1 (EFNA1), transcript variant 1, mRNA.	NM_004428.2	9.01	8.19	-0.82	5.39
ILMN_2394305	PDGFB	platelet-derived growth factor beta polypeptide (simian sarcoma viral (v-sis) oncogene homolog) (PDGFB), transcript variant 2, mRNA.	NM_033016.1	6.45	7.12	0.67	5.35
ILMN_1683916	PEX13	peroxisome biogenesis factor 13 (PEX13), mRNA.	NM_002618.2	9.55	10.19	0.64	5.35
ILMN_1738546	LOC400578	PREDICTED: similar to Keratin, type I cytoskeletal 14 (Cytokeratin-14) (CK-14) (Keratin-14) (K14) (LOC400578), mRNA.	XR_017543.1	6.7	7.62	0.93	5.34
ILMN_1803510	LOC650803	PREDICTED: hypothetical protein LOC650803 (LOC650803), mRNA.	XM_939893.1	7.46	8.34	0.87	5.34
ILMN_1827562		cDNA FLJ42786 fis, clone BRAWH3006761		6.8	7.58	0.78	5.34
ILMN_2364022	SLC16A3	solute carrier family 16, member 3 (monocarboxylic acid transporter 4) (SLC16A3), transcript variant 2, mRNA.	NM_004207.2	8.54	9.28	0.74	5.32
ILMN_1802082	PRDM8	PR domain containing 8 (PRDM8), transcript variant 1, mRNA.	NM_020226.3	6.85	7.79	0.95	5.3
ILMN_2098616	C5orf39	chromosome 5 open reading frame 39 (C5orf39), mRNA.	NM_001014279.1	7.34	6.7	-0.64	5.3
ILMN_1670158	FAM83A	family with sequence similarity 83, member A (FAM83A), transcript variant 2, mRNA.	NM_207006.1	8.25	9.01	0.76	5.27
ILMN_1757129	TMEM88	transmembrane protein 88 (TMEM88), mRNA.	NM_203411.1	5.91	6.92	1	5.26
ILMN_1739840	LRRC8A	leucine rich repeat containing 8 family, member A (LRRC8A), mRNA.	NM_019594.2	11.14	11.66	0.52	5.25
ILMN_1814282	ISG20L1	interferon stimulated exonuclease gene 20kDa-like 1 (ISG20L1), mRNA.	NM_022767.2	8.98	9.78	0.8	5.24
ILMN_1740466	FAM46A	family with sequence similarity 46, member A (FAM46A), mRNA.	NM_017633.2	8.82	8.21	-0.61	5.23
ILMN_1726512	ZSCAN2	zinc finger and SCAN domain containing 2 (ZSCAN2), transcript variant 1, mRNA.	NM_181877.3	7.86	7.15	-0.7	5.2
ILMN_1660204	IGSF9B	immunoglobulin superfamily, member 9B (IGSF9B), mRNA.	NM_014987.1	7.16	7.98	0.82	5.19
ILMN_1765574	TFAP2A	transcription factor AP-2 alpha (activating enhancer binding protein 2 alpha) (TFAP2A), transcript variant 3, mRNA.	NM_001042425.1	11.98	11.24	-0.74	5.19
ILMN_2412380	TSC22D1	TSC22 domain family, member 1 (TSC22D1), transcript variant 1, mRNA.	NM_183422.1	9.79	10.72	0.92	5.17
ILMN_1913858		DB233579 TRACH3 cDNA clone TRACH3027878 5, mRNA sequence		5.69	6.41	0.72	5.15
ILMN_1663080	LFNG	LFNG O-fucosylpeptide 3-beta-N-acetylglucosaminyltransferase (LFNG), transcript variant 1, mRNA.	NM_001040167.1	10.73	11.39	0.66	5.15
ILMN_1721842	RYBP	RING1 and YY1 binding protein (RYBP), mRNA.	NM_012234.4	9.6	10.44	0.84	5.04
ILMN_1792072	FUT4	fucosyltransferase 4 (alpha (1,3) fucosyltransferase, myeloid-specific) (FUT4), mRNA.	NM_002033.2	7.08	7.86	0.78	5.04
ILMN_1710514	BCL3	B-cell CLL/lymphoma 3 (BCL3), mRNA.	NM_005178.2	7.59	8.22	0.63	5.02
ILMN_1747673	RASL10A	RAS-like, family 10, member A (RASL10A), transcript variant 2, mRNA.	NM_001007279.1	6.12	6.82	0.7	4.94
ILMN_1784364	STARD5	StAR-related lipid transfer (START) domain containing 5 (STARD5), mRNA.	NM_181900.2	8.43	7.8	-0.63	4.93
ILMN_1716370	TNS4	tensin 4 (TNS4), mRNA.	NM_032865.4	6.1	6.98	0.89	4.92
ILMN_1671731	AVPI1	arginine vasopressin-induced 1 (AVPI1), mRNA.	NM_021732.1	12.05	11.5	-0.54	4.87
ILMN_1809433	XBP1	X-box binding protein 1 (XBP1), transcript variant 1, mRNA.	NM_005080.2	12.38	13.07	0.69	4.83
ILMN_1727361	LEMD3	LEM domain containing 3 (LEMD3), mRNA.	NM_014319.3	9.88	10.78	0.89	4.82
ILMN_1660847	PFKFB3	6-phosphofructo-2-kinase/fructose-2,6-biphosphatase 3 (PFKFB3), mRNA.	NM_004566.2	7.3	8.04	0.75	4.8
ILMN_1728710	ZNF816A	zinc finger protein 816A (ZNF816A), mRNA.	NM_001031665.1	8.36	7.77	-0.58	4.69
ILMN_1798256	UPP1	uridine phosphorylase 1 (UPP1), transcript variant 1, mRNA.	NM_003364.2	11.95	12.51	0.56	4.63
ILMN_1652223	WDR91	WD repeat domain 91 (WDR91), mRNA.	NM_014149.2	7.25	7.96	0.71	4.62
ILMN_1655557	INTS6	integrator complex subunit 6 (INTS6), transcript variant 2, mRNA.	NM_001039937.1	10.61	11.19	0.58	4.62
ILMN_1800311	HSF2	heat shock transcription factor 2 (HSF2), mRNA.	NM_004506.2	8.54	7.88	-0.66	4.56
ILMN_2408543	PLAUR	plasminogen activator, urokinase receptor (PLAUR), transcript variant 1, mRNA.	NM_002659.2	6.91	7.74	0.83	4.53
ILMN_1668863	LYPD1	LY6/PLAUR domain containing 1 (LYPD1), transcript variant 1, mRNA.	NM_144586.5	8.48	9.3	0.81	4.53
ILMN_1690921	STAT2	signal transducer and activator of transcription 2, 113kDa (STAT2), mRNA.	NM_005419.2	10.59	10.04	-0.56	4.53
ILMN_2239774	FAM83A	family with sequence similarity 83, member A (FAM83A), transcript variant 1, mRNA.	NM_032899.4	8.49	9.37	0.87	4.5
ILMN_1737993	ERBB3	v-erb-b2 erythroblastic leukemia viral oncogene homolog 3 (avian) (ERBB3), transcript variant s, mRNA.	NM_001005915.1	7.87	6.98	-0.89	4.5
ILMN_1713983	FLJ41766	PREDICTED: similar to hypothetical protein, transcript variant 1 (FLJ41766), mRNA.	XM_375307.4	7.51	6.74	-0.77	4.43
ILMN_1751598	SESN2	sestrin 2 (SESN2), mRNA.	NM_031459.3	6.56	7.36	0.8	4.39
ILMN_1714170	SPSB1	splA/ryanodine receptor domain and SOCS box containing 1 (SPSB1), mRNA.	NM_025106.2	7.58	8.3	0.72	4.37
ILMN_1723481	CHST3	carbohydrate (chondroitin 6) sulfotransferase 3 (CHST3), mRNA.	NM_004273.2	7.87	8.5	0.63	4.37
ILMN_1701308	COL1A1	collagen, type I, alpha 1 (COL1A1), mRNA.	NM_000088.3	6.15	6.85	0.7	4.36
ILMN_1698484	RHOV	ras homolog gene family, member V (RHOV), mRNA.	NM_133639.2	6.57	5.83	-0.74	4.36
ILMN_1717636	RGMA	RGM domain family, member A (RGMA), mRNA.	NM_020211.1	7.86	7.1	-0.76	4.36
ILMN_1705814	KRT80	keratin 80 (KRT80), transcript variant 1, mRNA.	NM_182507.2	11.9	12.46	0.56	4.34
ILMN_1793474	INSIG1	insulin induced gene 1 (INSIG1), transcript variant 2, mRNA.	NM_198336.1	10.44	9.9	-0.55	4.32
ILMN_1691180	OTX1	orthodenticle homeobox 1 (OTX1), mRNA.	NM_014562.2	7.88	6.84	-1.04	4.32
ILMN_1775501	IL1B	interleukin 1, beta (IL1B), mRNA.	NM_000576.2	7.49	6.82	-0.67	4.31
ILMN_1669052	LRRC8E	leucine rich repeat containing 8 family, member E (LRRC8E), mRNA.	NM_025061.3	8.01	8.6	0.59	4.29
ILMN_2081087	HSPA12A	heat shock 70kDa protein 12A (HSPA12A), mRNA.	NM_025015.2	10.58	11.09	0.52	4.28
ILMN_1792389	RNF165	ring finger protein 165 (RNF165), mRNA.	NM_152470.2	8.42	9.22	0.8	4.23
ILMN_1904596		xd95a11.x1 Soares_NFL_T_GBC_S1 cDNA clone IMAGE:2605340 3, mRNA sequence		5.76	6.29	0.54	4.23
ILMN_1903914		cDNA FLJ26188 fis, clone ADG04821		8.24	9.04	0.79	4.22
ILMN_1666122	HEG1	HEG homolog 1 (zebrafish) (HEG1), mRNA.	NM_020733.1	7.66	8.32	0.66	4.22
ILMN_2390310	C17orf91	chromosome 17 open reading frame 91 (C17orf91), transcript variant 2, mRNA.	NM_001001870.1	9.67	10.27	0.6	4.17
ILMN_1730928	CDK5R1	cyclin-dependent kinase 5, regulatory subunit 1 (p35) (CDK5R1), mRNA.	NM_003885.2	7.1	7.81	0.71	4.11
ILMN_1776788	C5orf41	chromosome 5 open reading frame 41 (C5orf41), mRNA.	NM_153607.1	7.98	7.09	-0.9	4.11
ILMN_2198413	MYEOV	myeloma overexpressed gene (in a subset of t(11;14) positive multiple myelomas) (MYEOV), mRNA.	NM_138768.2	5.92	7.08	1.17	4.07
ILMN_1909770		cDNA: FLJ21199 fis, clone COL00235		6.4	7.2	0.79	4.04
ILMN_1674160	BIN1	bridging integrator 1 (BIN1), transcript variant 4, mRNA.	NM_139346.1	8.8	9.32	0.52	4.02
ILMN_1716265	PGM2L1	phosphoglucomutase 2-like 1 (PGM2L1), mRNA.	NM_173582.3	6.57	7.2	0.63	3.99
ILMN_1910330		BX116720 Soares_testis_NHT cDNA clone IMAGp998F241782, mRNA sequence		8.05	8.58	0.52	3.91
ILMN_1666376	TRIM56	tripartite motif-containing 56 (TRIM56), mRNA.	NM_030961.1	8.99	9.79	0.8	3.86
ILMN_1686513	CNTNAP3B	PREDICTED: contactin associated protein-like 3B, transcript variant 1 (CNTNAP3B), mRNA.	XM_497089.2	7.26	6.52	-0.74	3.82
ILMN_2188264	CYR61	cysteine-rich, angiogenic inducer, 61 (CYR61), mRNA.	NM_001554.3	7.97	9.31	1.34	3.81
ILMN_1655612	ARRDC2	arrestin domain containing 2 (ARRDC2), transcript variant 1, mRNA.	NM_015683.1	6.8	7.48	0.69	3.8
ILMN_1756953	GBP6	guanylate binding protein family, member 6 (GBP6), mRNA.	NM_198460.1	9.11	8.45	-0.66	3.78
ILMN_1762606	AQP11	aquaporin 11 (AQP11), mRNA.	NM_173039.1	7.26	6.66	-0.6	3.77
ILMN_1699989	BNIPL	BCL2/adenovirus E1B 19kD interacting protein like (BNIPL), mRNA.	NM_138278.2	7.96	7.24	-0.72	3.74
ILMN_2342066	METRNL	meteorin, glial cell differentiation regulator-like (METRNL), mRNA.	NM_001004431.1	6.63	7.31	0.68	3.72
ILMN_1770498	LOC728411	PREDICTED: similar to Beta-glucuronidase precursor (LOC728411), mRNA.	XM_001128030.1	7.84	7.23	-0.61	3.72
ILMN_2375879	VEGFA	vascular endothelial growth factor A (VEGFA), transcript variant 2, mRNA.	NM_003376.4	7.92	8.58	0.66	3.71
ILMN_1775587	STX19	syntaxin 19 (STX19), mRNA.	NM_001001850.1	7.86	7.21	-0.64	3.68
ILMN_1808047	PHC2	polyhomeotic homolog 2 (Drosophila) (PHC2), transcript variant 2, mRNA.	NM_004427.3	6.99	7.87	0.88	3.65
ILMN_1720595	MDGA1	MAM domain containing glycosylphosphatidylinositol anchor 1 (MDGA1), mRNA.	NM_153487.3	7.55	8.22	0.67	3.65
ILMN_1863962		BX116033 NCI_CGAP_Lu24 cDNA clone IMAGp998A155622, mRNA sequence		7.24	6.63	-0.61	3.61
ILMN_1824362		BX105338 Soares_pregnant_uterus_NbHPU cDNA clone IMAGp998C114347, mRNA sequence		8.8	9.53	0.73	3.59
ILMN_1653856	STS-1	Cbl-interacting protein Sts-1 (STS-1), mRNA.	NM_032873.3	9.86	10.6	0.74	3.56
ILMN_1781565	MESDC1	mesoderm development candidate 1 (MESDC1), mRNA.	NM_022566.1	7.14	7.75	0.61	3.53
ILMN_2157099	CCNA1	cyclin A1 (CCNA1), mRNA.	NM_003914.2	7.51	8.02	0.51	3.53
ILMN_2324561	SLC7A6	solute carrier family 7 (cationic amino acid transporter, y+ system), member 6 (SLC7A6), transcript variant 2, mRNA.	NM_001076785.1	8.3	8.95	0.66	3.52
ILMN_1823850		RST21348 Athersys RAGE Library cDNA, mRNA sequence		6.56	7.51	0.95	3.51
ILMN_2230566	RAB40B	RAB40B, member RAS oncogene family (RAB40B), mRNA.	NM_006822.1	10.52	10	-0.52	3.51
ILMN_1770293	KLF5	Kruppel-like factor 5 (intestinal) (KLF5), mRNA.	NM_001730.3	9.15	8.27	-0.88	3.48
ILMN_1907544		UI-E-EJ1-ajw-b-16-0-UI.r1 UI-E-EJ1 cDNA clone UI-E-EJ1-ajw-b-16-0-UI 5, mRNA sequence		7.36	7.98	0.62	3.36
ILMN_1656761	TGIF1	TGFB-induced factor homeobox 1 (TGIF1), transcript variant 5, mRNA.	NM_173209.1	6.06	6.74	0.68	3.33
ILMN_2133534	SMA4	SMA4 (SMA4), mRNA.	NM_021652.2	8.39	7.8	-0.6	3.32
ILMN_1815102	LCAT	lecithin-cholesterol acyltransferase (LCAT), mRNA.	NM_000229.1	7.17	7.79	0.62	3.25
ILMN_1773154	NFKBIA	nuclear factor of kappa light polypeptide gene enhancer in B-cells inhibitor, alpha (NFKBIA), mRNA.	NM_020529.1	11.27	10.71	-0.56	3.21
ILMN_1787251	DAAM1	dishevelled associated activator of morphogenesis 1 (DAAM1), mRNA.	NM_014992.1	12.14	13.05	0.9	3.2
ILMN_1661303	FLJ46309	hypothetical protein LOC649598 (FLJ46309), mRNA.	NM_001039797.1	6.52	5.99	-0.53	3.17
ILMN_1686261	TOM1L2	target of myb1-like 2 (chicken) (TOM1L2), transcript variant 3, mRNA.	NM_001082968.1	7.23	7.83	0.6	3.16
ILMN_1741159	MAP3K8	mitogen-activated protein kinase kinase kinase 8 (MAP3K8), mRNA.	NM_005204.2	7.79	7.14	-0.65	3.16
ILMN_1657996	LOC642035	PREDICTED: hypothetical protein LOC642035 (LOC642035), mRNA.	XM_936105.1	7.09	7.75	0.66	3.13
ILMN_1797704	LOC729252	PREDICTED: similar to Keratin, type I cytoskeletal 14 (Cytokeratin-14) (CK-14) (Keratin-14) (K14) (LOC729252), mRNA.	XR_015937.1	8.39	9.04	0.65	3.12
ILMN_2150258	ZFP36L2	zinc finger protein 36, C3H type-like 2 (ZFP36L2), mRNA.	NM_006887.3	8.21	9.04	0.82	3.1
ILMN_1738047	C10orf73	PREDICTED: chromosome 10 open reading frame 73 (C10orf73), mRNA.	XM_096317.11	6.66	6.12	-0.54	3.1
ILMN_1797372	C3orf58	chromosome 3 open reading frame 58 (C3orf58), mRNA.	NM_173552.2	8.61	7.84	-0.77	3.09
ILMN_1767377	LOC153561	hypothetical protein LOC153561 (LOC153561), mRNA.	NM_207331.2	7.42	6.83	-0.58	3.03
ILMN_1801307	TNFSF10	tumor necrosis factor (ligand) superfamily, member 10 (TNFSF10), mRNA.	NM_003810.2	9.63	8.89	-0.74	2.99
ILMN_1685122	COL9A2	collagen, type IX, alpha 2 (COL9A2), mRNA.	NM_001852.3	6.13	6.65	0.52	2.95
ILMN_1879480		cDNA FLJ35319 fis, clone PROST2011577		7.37	6.72	-0.64	2.94
ILMN_1814494	SEMA6D	sema domain, transmembrane domain (TM), and cytoplasmic domain, (semaphorin) 6D (SEMA6D), transcript variant 5, mRNA.	NM_153619.1	6.73	5.94	-0.79	2.88
ILMN_1722811	CDKN1B	cyclin-dependent kinase inhibitor 1B (p27, Kip1) (CDKN1B), mRNA.	NM_004064.2	9.44	8.59	-0.85	2.86
ILMN_1751034	LOC162073	hypothetical protein LOC162073 (LOC162073), mRNA.	NM_001034841.2	11.77	12.32	0.54	2.85
ILMN_1769388	GJB2	gap junction protein, beta 2, 26kDa (GJB2), mRNA.	NM_004004.4	9.9	10.73	0.83	2.82
ILMN_1726678	HSPC047	HSPC047 protein (HSPC047), mRNA.	NM_014147.1	6.6	7.3	0.69	2.77
ILMN_1910908		RST24587 Athersys RAGE Library cDNA, mRNA sequence		6.23	6.74	0.52	2.76
ILMN_1735553	MAP3K9	mitogen-activated protein kinase kinase kinase 9 (MAP3K9), mRNA.	NM_033141.2	6.54	7.32	0.78	2.72
ILMN_1703913	DST	dystonin (DST), transcript variant 1e, mRNA.	NM_001723.4	9.42	8.8	-0.62	2.71
ILMN_1751346	ERBB3	v-erb-b2 erythroblastic leukemia viral oncogene homolog 3 (avian) (ERBB3), transcript variant 1, mRNA.	NM_001982.2	9.08	8.25	-0.84	2.7
ILMN_1662483	SMA5	SMA5 (SMA5), mRNA.	NM_021036.1	7.59	6.9	-0.69	2.64
ILMN_1768754	PILRB	paired immunoglobin-like type 2 receptor beta (PILRB), transcript variant 1, mRNA.	NM_013440.3	9.84	9.23	-0.61	2.62
ILMN_1686988	ST5	suppression of tumorigenicity 5 (ST5), transcript variant 3, mRNA.	NM_213618.1	7.31	7.87	0.56	2.59
ILMN_2308338	BMF	Bcl2 modifying factor (BMF), transcript variant 4, mRNA.	NM_001003943.1	6.64	7.28	0.64	2.58
ILMN_1658798	MEGF9	multiple EGF-like-domains 9 (MEGF9), mRNA.	NM_001080497.1	6.83	7.4	0.57	2.58
ILMN_1671854	2009-09-01	PREDICTED: septin 1, transcript variant 3 (SEPT1), mRNA.	XM_944593.1	7.19	6.63	-0.56	2.58
ILMN_2228732	CCNG2	cyclin G2 (CCNG2), mRNA.	NM_004354.1	9.19	8.58	-0.61	2.57
ILMN_2075927	STK40	serine/threonine kinase 40 (STK40), mRNA.	NM_032017.1	10.15	10.7	0.56	2.53
ILMN_1681118	CAPRIN2	caprin family member 2 (CAPRIN2), transcript variant 1, mRNA.	NM_001002259.1	8.06	8.62	0.56	2.53
ILMN_1814106	MGC59937	Similar to RIKEN cDNA 2310002J15 gene (MGC59937), mRNA.	NM_199001.1	10.85	11.37	0.52	2.53
ILMN_1737715	OSR2	PREDICTED: odd-skipped related 2 (Drosophila) (OSR2), mRNA.	XM_001126824.1	7.46	6.64	-0.82	2.51
ILMN_2396875	IGFBP3	insulin-like growth factor binding protein 3 (IGFBP3), transcript variant 1, mRNA.	NM_001013398.1	9.67	9.15	-0.52	2.49
ILMN_1659990	HIG2	hypoxia-inducible protein 2 (HIG2), transcript variant 1, mRNA.	NM_013332.3	7.61	6.82	-0.79	2.46
ILMN_2350574	MYADM	myeloid-associated differentiation marker (MYADM), transcript variant 2, mRNA.	NM_138373.3	7.18	7.85	0.67	2.45
ILMN_1836776		cDNA FLJ34018 fis, clone FCBBF2002801		7.9	8.45	0.56	2.41
ILMN_1765641	SEMA3A	sema domain, immunoglobulin domain (Ig), short basic domain, secreted, (semaphorin) 3A (SEMA3A), mRNA.	NM_006080.2	9.3	8.77	-0.53	2.4
ILMN_1778668	TAGLN	transgelin (TAGLN), transcript variant 2, mRNA.	NM_003186.3	8.79	9.37	0.58	2.39
ILMN_1718934	LOC728499	PREDICTED: similar to Nuclear envelope pore membrane protein POM 121 (Pore membrane protein of 121 kDa) (P145) (LOC728499), mRNA.	XM_001127568.1	9.24	8.59	-0.65	2.38
ILMN_1657749	CYP27C1	cytochrome P450, family 27, subfamily C, polypeptide 1 (CYP27C1), mRNA.	NM_001001665.2	7.49	8.14	0.65	2.34
ILMN_1780172	C20orf195	chromosome 20 open reading frame 195 (C20orf195), mRNA.	NM_024059.2	6.6	7.19	0.6	2.34
ILMN_1746436	HCG27	HLA complex group 27 (HCG27), mRNA.	NM_181717.2	6.92	6.4	-0.52	2.25
ILMN_2193706	HRK	harakiri, BCL2 interacting protein (contains only BH3 domain) (HRK), mRNA.	NM_003806.1	7.58	8.16	0.58	2.18
ILMN_1680618	MYC	v-myc myelocytomatosis viral oncogene homolog (avian) (MYC), mRNA.	NM_002467.3	10.88	11.45	0.57	2.18
ILMN_1765122	MAP3K2	PREDICTED: mitogen-activated protein kinase kinase kinase 2 (MAP3K2), mRNA.	XM_001128799.1	9.35	9.89	0.54	2.18
ILMN_1716089	KANK2	KN motif and ankyrin repeat domains 2 (KANK2), mRNA.	NM_015493.4	7.32	7.91	0.59	2.16
ILMN_2410421	NBPF1	neuroblastoma breakpoint family, member 1 (NBPF1), mRNA. XM_934962 XM_934964 XM_934966 XM_934967 XM_934969 XM_934972 XM_934973 XM_934974 XM_934975 XM_934976 XM_934978	NM_017940.2	7.9	7.25	-0.65	2.14
ILMN_1807093	FLJ45248	FLJ45248 protein (FLJ45248), mRNA.	NM_207505.1	6.21	6.8	0.59	2.13
ILMN_2345739	CAPRIN2	caprin family member 2 (CAPRIN2), transcript variant 2, mRNA.	NM_023925.3	7.89	8.51	0.61	2.12
ILMN_2290118	MEGF9	multiple EGF-like-domains 9 (MEGF9), mRNA.	NM_001080497.1	7.82	8.62	0.79	2.09
ILMN_1810942	CYP3A5	cytochrome P450, family 3, subfamily A, polypeptide 5 (CYP3A5), mRNA.	NM_000777.2	6.6	6.03	-0.57	2.08
ILMN_1739241	CHAC1	ChaC, cation transport regulator homolog 1 (E. coli) (CHAC1), mRNA.	NM_024111.2	7.24	7.92	0.67	2.02

## Sheet: 4h TGFb
Illumina Identifier	HGNC gene symbol	Gene Description	Refseq ID	UT 4h	UT+TGFb 4h	LR +/- TGFb 4h	-log10 pVAL LR +/- TGFb 4h
ILMN_1744381	SERPINE1	serpin peptidase inhibitor, clade E (nexin, plasminogen activator inhibitor type 1), member 1 (SERPINE1), mRNA.	NM_000602.1	7.11	12.23	5.13	43.08
ILMN_1667295	VASN	vasorin (VASN), mRNA.	NM_138440.2	6.67	10.08	3.41	37.51
ILMN_2309156	PMEPA1	prostate transmembrane protein, androgen induced 1 (PMEPA1), transcript variant 2, mRNA.	NM_199169.1	8.78	12.16	3.38	36.26
ILMN_1776936	ANKRD38	ankyrin repeat domain 38 (ANKRD38), mRNA.	NM_181712.3	6.42	9.91	3.49	34.13
ILMN_1734276	PMEPA1	prostate transmembrane protein, androgen induced 1 (PMEPA1), transcript variant 2, mRNA.	NM_199169.1	9.72	13.18	3.46	33.82
ILMN_1721770	PAPPA	pregnancy-associated plasma protein A, pappalysin 1 (PAPPA), mRNA.	NM_002581.3	7.1	10.79	3.7	32.96
ILMN_1705750	TGM2	transglutaminase 2 (C polypeptide, protein-glutamine-gamma-glutamyltransferase) (TGM2), transcript variant 1, mRNA.	NM_004613.2	6.53	10.48	3.95	31.97
ILMN_1749414	MGC4294	PREDICTED: hypothetical protein MGC4294 (MGC4294), misc RNA.	XR_017834.1	5.87	8.28	2.42	31.5
ILMN_1699829	CTGF	connective tissue growth factor (CTGF), mRNA.	NM_001901.1	6.89	10.36	3.46	30.21
ILMN_1713751	ADAM19	ADAM metallopeptidase domain 19 (meltrin beta) (ADAM19), transcript variant 2, mRNA.	NM_033274.2	8.43	11.84	3.41	30.1
ILMN_2115125	CTGF	connective tissue growth factor (CTGF), mRNA.	NM_001901.2	7.03	10.12	3.09	29.68
ILMN_1741847	MMP10	matrix metallopeptidase 10 (stromelysin 2) (MMP10), mRNA.	NM_002425.1	8.2	11.15	2.95	28.44
ILMN_1655595	SERPINE2	serpin peptidase inhibitor, clade E (nexin, plasminogen activator inhibitor type 1), member 2 (SERPINE2), mRNA.	NM_006216.2	12.65	14.53	1.88	27.98
ILMN_1769201	ELF3	E74-like factor 3 (ets domain transcription factor, epithelial-specific ) (ELF3), mRNA.	NM_004433.3	9.63	6.66	-2.97	26.98
ILMN_1651950	TPST1	tyrosylprotein sulfotransferase 1 (TPST1), mRNA.	NM_003596.2	7.91	9.87	1.96	26.95
ILMN_1705231	SLCO2A1	solute carrier organic anion transporter family, member 2A1 (SLCO2A1), mRNA.	NM_005630.1	7.58	10.29	2.71	26.81
ILMN_2399300	NAV2	neuron navigator 2 (NAV2), transcript variant 2, mRNA.	NM_145117.3	8.63	11.34	2.71	26.64
ILMN_1772824	WNT5B	wingless-type MMTV integration site family, member 5B (WNT5B), transcript variant 1, mRNA.	NM_032642.2	6.76	9.04	2.28	26.16
ILMN_1864372		BX097797 Soares_pregnant_uterus_NbHPU cDNA clone IMAGp998N171164, mRNA sequence		7.34	10.15	2.8	25.66
ILMN_2203891	SMAD7	SMAD family member 7 (SMAD7), mRNA.	NM_005904.2	7.69	9.64	1.95	25.49
ILMN_1736190	CYP4F3	cytochrome P450, family 4, subfamily F, polypeptide 3 (CYP4F3), mRNA.	NM_000896.1	9.96	7.68	-2.28	24.41
ILMN_2376723	CDKN2B	cyclin-dependent kinase inhibitor 2B (p15, inhibits CDK4) (CDKN2B), transcript variant 2, mRNA.	NM_078487.2	9.58	11.88	2.3	24.25
ILMN_1797875	ALOX5AP	arachidonate 5-lipoxygenase-activating protein (ALOX5AP), mRNA.	NM_001629.2	5.89	8.11	2.22	23.7
ILMN_1712475	HS3ST2	heparan sulfate (glucosamine) 3-O-sulfotransferase 2 (HS3ST2), mRNA.	NM_006043.1	9.33	11.61	2.28	23.3
ILMN_2174711	C21orf129	chromosome 21 open reading frame 129 (C21orf129), mRNA.	NM_152506.1	8.77	6.81	-1.96	22.9
ILMN_1679391	MAMDC2	MAM domain containing 2 (MAMDC2), mRNA.	NM_153267.3	8.55	10.6	2.06	22.43
ILMN_1655740	SNAI2	snail homolog 2 (Drosophila) (SNAI2), mRNA.	NM_003068.3	9.13	11.17	2.03	22.43
ILMN_2188722	GLS	glutaminase (GLS), mRNA.	NM_014905.2	9.82	11.62	1.79	22.27
ILMN_1775380	SMOX	spermine oxidase (SMOX), transcript variant 4, mRNA.	NM_175842.1	9.37	11.01	1.64	22.27
ILMN_1766650	FOXA1	forkhead box A1 (FOXA1), mRNA.	NM_004496.2	11.81	9.51	-2.29	22.08
ILMN_1720158	ETS2	v-ets erythroblastosis virus E26 oncogene homolog 2 (avian) (ETS2), mRNA.	NM_005239.4	9.08	10.81	1.73	22.08
ILMN_2399304	NAV2	neuron navigator 2 (NAV2), transcript variant 2, mRNA.	NM_145117.3	6.62	8.8	2.18	21.87
ILMN_1695604	DCBLD1	discoidin, CUB and LCCL domain containing 1 (DCBLD1), mRNA.	NM_173674.1	8.61	11.02	2.41	21.63
ILMN_1812926	ANTXR2	anthrax toxin receptor 2 (ANTXR2), mRNA.	NM_058172.3	7.54	9.82	2.29	21.49
ILMN_1768534	BHLHB2	basic helix-loop-helix domain containing, class B, 2 (BHLHB2), mRNA.	NM_003670.1	9.01	10.97	1.95	21.36
ILMN_2315979	LBH	limb bud and heart development homolog (mouse) (LBH), mRNA.	NM_030915.1	7.36	9.64	2.28	21.32
ILMN_1701424	LAMC2	laminin, gamma 2 (LAMC2), transcript variant 1, mRNA.	NM_005562.1	11.18	12.87	1.69	21.01
ILMN_1723198	CDKN2B	cyclin-dependent kinase inhibitor 2B (p15, inhibits CDK4) (CDKN2B), transcript variant 1, mRNA.	NM_004936.3	8.49	10.73	2.23	20.64
ILMN_1698666	CST6	cystatin E/M (CST6), mRNA.	NM_001323.2	6.35	8.19	1.85	20.59
ILMN_1752810	LARP6	La ribonucleoprotein domain family, member 6 (LARP6), transcript variant 1, mRNA.	NM_018357.2	9.13	10.9	1.76	20.57
ILMN_1746502	LOC399978	PREDICTED: hypothetical LOC399978 (LOC399978), mRNA.	XM_944623.2	6.21	8.98	2.78	20.5
ILMN_1714433	MARCKSL1	MARCKS-like 1 (MARCKSL1), mRNA.	NM_023009.4	8.71	10.1	1.39	20.48
ILMN_2044645	CGB1	chorionic gonadotropin, beta polypeptide 1 (CGB1), mRNA.	NM_033377.1	7.4	9.42	2.01	20.47
ILMN_1812526	TGFB2	transforming growth factor, beta 2 (TGFB2), mRNA.	NM_003238.1	5.83	7.9	2.07	20.42
ILMN_1729161	NOTCH1	Notch homolog 1, translocation-associated (Drosophila) (NOTCH1), mRNA.	NM_017617.3	11.98	10.14	-1.84	20.41
ILMN_2367258	SMOX	spermine oxidase (SMOX), transcript variant 2, mRNA.	NM_175840.1	7.83	9.59	1.76	20.34
ILMN_2400644	SRGAP3	SLIT-ROBO Rho GTPase activating protein 3 (SRGAP3), transcript variant 2, mRNA.	NM_001033117.1	9.21	7.19	-2.02	20.16
ILMN_2163790	CGB5	chorionic gonadotropin, beta polypeptide 5 (CGB5), mRNA.	NM_033043.1	6.62	8.81	2.19	20.16
ILMN_1659610	TJP3	tight junction protein 3 (zona occludens 3) (TJP3), mRNA.	NM_014428.1	9.5	7.44	-2.06	19.93
ILMN_1777233	E2F2	E2F transcription factor 2 (E2F2), mRNA.	NM_004091.2	11.11	9.37	-1.74	19.52
ILMN_1679754	ADRA1B	adrenergic, alpha-1B-, receptor (ADRA1B), mRNA.	NM_000679.3	6.65	8.95	2.3	19.52
ILMN_2405305	ARNTL	aryl hydrocarbon receptor nuclear translocator-like (ARNTL), transcript variant 2, mRNA.	NM_001030272.1	7.55	9.43	1.87	19.52
ILMN_1657823	PMEPA1	prostate transmembrane protein, androgen induced 1 (PMEPA1), transcript variant 1, mRNA.	NM_020182.3	6.21	8.29	2.08	19.38
ILMN_1769615	FLRT2	fibronectin leucine rich transmembrane protein 2 (FLRT2), mRNA.	NM_013231.4	6.22	8.35	2.13	19.02
ILMN_1830462	XYLT1	xylosyltransferase I (XYLT1), mRNA.	NM_022166.3	5.89	7.63	1.73	18.87
ILMN_1892643		RST11549 Athersys RAGE Library cDNA, mRNA sequence		7.96	9.84	1.87	18.77
ILMN_1713744	C14orf132	chromosome 14 open reading frame 132 (C14orf132), mRNA.	NM_020215.2	7.75	6.29	-1.46	18.6
ILMN_1806907	PAWR	PRKC, apoptosis, WT1, regulator (PAWR), mRNA.	NM_002583.2	10.68	11.97	1.28	18.6
ILMN_1664861	ID1	inhibitor of DNA binding 1, dominant negative helix-loop-helix protein (ID1), transcript variant 2, mRNA.	NM_181353.1	11.36	9.61	-1.75	18.53
ILMN_1760247	CD70	CD70 molecule (CD70), mRNA.	NM_001252.3	8.45	6.98	-1.47	18.36
ILMN_1691376	JAG1	jagged 1 (Alagille syndrome) (JAG1), mRNA.	NM_000214.1	9.72	11.03	1.31	18.36
ILMN_1810000	RDH16	retinol dehydrogenase 16 (all-trans) (RDH16), mRNA.	NM_003708.3	6.45	8.75	2.31	18.36
ILMN_1704418	FOXD1	forkhead box D1 (FOXD1), mRNA.	NM_004472.2	9.19	10.79	1.6	18.35
ILMN_1672102	PTPRB	protein tyrosine phosphatase, receptor type, B (PTPRB), mRNA.	NM_002837.2	7.38	9.03	1.65	18.35
ILMN_1719695	NFKBIZ	nuclear factor of kappa light polypeptide gene enhancer in B-cells inhibitor, zeta (NFKBIZ), transcript variant 2, mRNA.	NM_001005474.1	10.6	9.06	-1.55	18.28
ILMN_1682775	EDN1	endothelin 1 (EDN1), mRNA.	NM_001955.2	6.94	8.77	1.83	18.27
ILMN_2406035	LAMA3	laminin, alpha 3 (LAMA3), transcript variant 1, mRNA.	NM_198129.1	11.25	12.96	1.72	18.23
ILMN_1720513	SETBP1	SET binding protein 1 (SETBP1), mRNA.	NM_015559.1	8.41	9.8	1.39	18.01
ILMN_1704247	LAMA3	laminin, alpha 3 (LAMA3), transcript variant 2, mRNA.	NM_000227.2	6.99	8.54	1.55	17.74
ILMN_1805665	FLRT3	fibronectin leucine rich transmembrane protein 3 (FLRT3), transcript variant 2, mRNA.	NM_198391.1	9.44	10.89	1.45	17.46
ILMN_2203896	SMAD7	SMAD family member 7 (SMAD7), mRNA.	NM_005904.2	7.17	9.23	2.06	17.46
ILMN_2082585	SNAI2	snail homolog 2 (Drosophila) (SNAI2), mRNA.	NM_003068.3	10.53	12.36	1.83	17.46
ILMN_1781745	C9orf152	chromosome 9 open reading frame 152 (C9orf152), mRNA.	NM_001012993.1	7.69	6.02	-1.66	17.45
ILMN_1706519	LAMC2	laminin, gamma 2 (LAMC2), transcript variant 2, mRNA.	NM_018891.1	7.37	9.71	2.34	17.43
ILMN_1723123	FGFR3	fibroblast growth factor receptor 3 (achondroplasia, thanatophoric dwarfism) (FGFR3), transcript variant 2, mRNA.	NM_022965.1	12.28	10.81	-1.47	17.28
ILMN_1702487	SGK	serum/glucocorticoid regulated kinase (SGK), mRNA.	NM_005627.2	9.48	11.06	1.58	17.15
ILMN_1685339	TPM1	tropomyosin 1 (alpha) (TPM1), transcript variant 6, mRNA.	NM_001018008.1	7.34	9	1.67	16.98
ILMN_2278152	TPM1	tropomyosin 1 (alpha) (TPM1), transcript variant 6, mRNA.	NM_001018008.1	7.33	9.12	1.79	16.98
ILMN_1697733	CST6	PREDICTED: cystatin E/M (CST6), mRNA.	XM_001129442.1	6.19	7.95	1.76	16.91
ILMN_1759232	IRS1	insulin receptor substrate 1 (IRS1), mRNA.	NM_005544.1	7.42	9.02	1.61	16.77
ILMN_1796316	MMP9	matrix metallopeptidase 9 (gelatinase B, 92kDa gelatinase, 92kDa type IV collagenase) (MMP9), mRNA.	NM_004994.2	6.29	8.32	2.04	16.64
ILMN_1669819	LOC402569	PREDICTED: similar to importin alpha 1b (LOC402569), misc RNA.	XR_015714.1	6.01	7.68	1.67	16.58
ILMN_1716608	NGF	nerve growth factor (beta polypeptide) (NGF), mRNA.	NM_002506.2	6.44	7.84	1.39	16.56
ILMN_1730575	GCLC	glutamate-cysteine ligase, catalytic subunit (GCLC), mRNA.	NM_001498.2	10.52	8.9	-1.61	16.41
ILMN_1784287	TGFBR3	transforming growth factor, beta receptor III (TGFBR3), mRNA.	NM_003243.2	8.43	6.78	-1.66	16.21
ILMN_1803593	WNT3	wingless-type MMTV integration site family, member 3 (WNT3), mRNA.	NM_030753.3	8.28	9.99	1.72	16.06
ILMN_1653028	COL4A1	collagen, type IV, alpha 1 (COL4A1), mRNA.	NM_001845.4	9.88	11.2	1.32	16.05
ILMN_1730670	FSTL3	follistatin-like 3 (secreted glycoprotein) (FSTL3), mRNA.	NM_005860.2	8.54	10.08	1.54	15.91
ILMN_1663401	LARP6	La ribonucleoprotein domain family, member 6 (LARP6), transcript variant 2, mRNA.	NM_197958.1	9.91	11.16	1.25	15.9
ILMN_1668411	FHL2	four and a half LIM domains 2 (FHL2), transcript variant 4, mRNA.	NM_201557.2	10.8	11.96	1.16	15.88
ILMN_1718387	LOR	loricrin (LOR), mRNA.	NM_000427.1	5.94	7.53	1.58	15.84
ILMN_1665792	ITGA2	integrin, alpha 2 (CD49B, alpha 2 subunit of VLA-2 receptor) (ITGA2), mRNA.	NM_002203.3	9.56	11.38	1.82	15.77
ILMN_1688892	LAMA3	laminin, alpha 3 (LAMA3), transcript variant 1, mRNA.	NM_198129.1	9.86	11.45	1.59	15.73
ILMN_1713995	SCNN1A	sodium channel, nonvoltage-gated 1 alpha (SCNN1A), mRNA.	NM_001038.4	10.84	9.32	-1.51	15.62
ILMN_2365465	XBP1	X-box binding protein 1 (XBP1), transcript variant 2, mRNA.	NM_001079539.1	11.41	12.48	1.07	15.55
ILMN_1718977	GADD45B	growth arrest and DNA-damage-inducible, beta (GADD45B), mRNA.	NM_015675.2	6.87	8.5	1.62	15.49
ILMN_1701204	VEGFC	vascular endothelial growth factor C (VEGFC), mRNA.	NM_005429.2	7.03	8.48	1.45	15.48
ILMN_1812297	CYP26B1	cytochrome P450, family 26, subfamily B, polypeptide 1 (CYP26B1), mRNA.	NM_019885.2	9.25	10.51	1.26	15.38
ILMN_1692754	TMEM49	transmembrane protein 49 (TMEM49), mRNA.	NM_030938.2	10.86	12.21	1.35	15.32
ILMN_1790577	SLC35F2	solute carrier family 35, member F2 (SLC35F2), mRNA.	NM_017515.3	9.29	10.47	1.18	15.32
ILMN_1733831	PGBD5	piggyBac transposable element derived 5 (PGBD5), mRNA.	NM_024554.2	6.07	7.89	1.82	15.31
ILMN_1676728	DLK2	delta-like 2 homolog (Drosophila) (DLK2), transcript variant 2, mRNA.	NM_206539.1	10.81	9.68	-1.13	15.3
ILMN_1801504	RUNX1	runt-related transcription factor 1 (acute myeloid leukemia 1; aml1 oncogene) (RUNX1), transcript variant 1, mRNA.	NM_001754.3	9.6	10.89	1.29	15.1
ILMN_1849033		Homo sapiens, clone IMAGE:5403381, mRNA		6.36	7.79	1.43	15.06
ILMN_1663866	TGFBI	transforming growth factor, beta-induced, 68kDa (TGFBI), mRNA.	NM_000358.1	13.93	15.1	1.18	15.03
ILMN_1785404	FGFBP1	fibroblast growth factor binding protein 1 (FGFBP1), mRNA.	NM_005130.3	12.59	11.47	-1.12	15
ILMN_1788131	CYP26A1	cytochrome P450, family 26, subfamily A, polypeptide 1 (CYP26A1), transcript variant 2, mRNA.	NM_057157.1	7.44	6.04	-1.4	14.81
ILMN_1658094	ZNF365	zinc finger protein 365 (ZNF365), transcript variant A, mRNA.	NM_014951.2	9.39	10.8	1.41	14.72
ILMN_1693912	SLC47A2	solute carrier family 47, member 2 (SLC47A2), transcript variant 1, mRNA.	NM_152908.3	10.13	8.49	-1.64	14.7
ILMN_1752932	MPZL2	myelin protein zero-like 2 (MPZL2), transcript variant 1, mRNA.	NM_005797.2	12.72	11.48	-1.24	14.69
ILMN_1689431	APCDD1L	adenomatosis polyposis coli down-regulated 1-like (APCDD1L), mRNA.	NM_153360.1	8.11	9.72	1.61	14.61
ILMN_1804662	NRG4	neuregulin 4 (NRG4), mRNA.	NM_138573.2	9.59	8.32	-1.27	14.58
ILMN_1700042	TLN2	talin 2 (TLN2), mRNA.	NM_015059.1	6.81	8.68	1.87	14.56
ILMN_1816174		cDNA clone IMAGE:5261489		8.99	7.2	-1.79	14.55
ILMN_2198878	INPP4B	inositol polyphosphate-4-phosphatase, type II, 105kDa (INPP4B), mRNA.	NM_003866.1	9.42	10.81	1.39	14.47
ILMN_1676663	TNFRSF11B	tumor necrosis factor receptor superfamily, member 11b (osteoprotegerin) (TNFRSF11B), mRNA.	NM_002546.3	7.26	9.04	1.77	14.47
ILMN_1651826	BASP1	brain abundant, membrane attached signal protein 1 (BASP1), mRNA.	NM_006317.3	7.94	9.58	1.64	14.44
ILMN_1680018	RIPK4	receptor-interacting serine-threonine kinase 4 (RIPK4), mRNA.	NM_020639.2	9.62	8.34	-1.28	14.29
ILMN_1811468	IRX3	iroquois homeobox 3 (IRX3), mRNA.	NM_024336.1	13.15	12.13	-1.02	14.29
ILMN_1874689		primary neuroblastoma cDNA, clone:Nbla10527, full insert sequence		10.24	11.65	1.42	14.29
ILMN_1811470	PLEK2	pleckstrin 2 (PLEK2), mRNA.	NM_016445.1	9.58	11.03	1.45	14.23
ILMN_1706531	ABCC5	ATP-binding cassette, sub-family C (CFTR/MRP), member 5 (ABCC5), transcript variant 1, mRNA.	NM_005688.2	11.44	10.15	-1.29	14.19
ILMN_2357134	SPHK1	sphingosine kinase 1 (SPHK1), transcript variant 1, mRNA.	NM_021972.2	7.02	8.43	1.41	14.15
ILMN_1902308		AGENCOURT_13567612 NIH_MGC_184 cDNA clone IMAGE:30326575 5, mRNA sequence		9.8	11.36	1.56	14.13
ILMN_1699856	RALGDS	ral guanine nucleotide dissociation stimulator (RALGDS), transcript variant 1, mRNA.	NM_006266.2	12.46	11.2	-1.26	13.83
ILMN_1790317	RAB26	RAB26, member RAS oncogene family (RAB26), mRNA.	NM_014353.4	9.22	7.7	-1.52	13.8
ILMN_1709750	SUSD1	sushi domain containing 1 (SUSD1), mRNA.	NM_022486.3	8.06	9.15	1.1	13.8
ILMN_1810604	ELMOD1	ELMO/CED-12 domain containing 1 (ELMOD1), mRNA.	NM_018712.2	6.27	7.52	1.25	13.76
ILMN_1736834	SKIL	SKI-like oncogene (SKIL), mRNA.	NM_005414.2	6.63	8.44	1.81	13.73
ILMN_2328094	DACT1	dapper, antagonist of beta-catenin, homolog 1 (Xenopus laevis) (DACT1), transcript variant 1, mRNA.	NM_016651.5	5.99	7.39	1.4	13.6
ILMN_1696585	FERMT1	fermitin family homolog 1 (Drosophila) (FERMT1), mRNA.	NM_017671.4	10.99	12.35	1.36	13.6
ILMN_1795298	GPER	G protein-coupled estrogen receptor 1 (GPER), transcript variant 3, mRNA.	NM_001039966.1	8.39	6.97	-1.42	13.47
ILMN_1672022	EPHA4	EPH receptor A4 (EPHA4), mRNA.	NM_004438.3	7.42	9	1.58	13.47
ILMN_1786470	C1orf74	chromosome 1 open reading frame 74 (C1orf74), mRNA.	NM_152485.2	8.66	9.71	1.06	13.45
ILMN_1718607	TSPAN4	tetraspanin 4 (TSPAN4), transcript variant 3, mRNA.	NM_001025235.1	8.97	10.35	1.39	13.44
ILMN_1881514		cDNA FLJ36847 fis, clone ASTRO2013671		7.43	8.61	1.17	13.4
ILMN_1724686	CLDN1	claudin 1 (CLDN1), mRNA.	NM_021101.3	13.73	12.18	-1.55	13.39
ILMN_1743619	NEDD9	neural precursor cell expressed, developmentally down-regulated 9 (NEDD9), transcript variant 2, mRNA.	NM_182966.2	6.52	7.8	1.28	13.33
ILMN_2199389	VIPR1	vasoactive intestinal peptide receptor 1 (VIPR1), mRNA.	NM_004624.2	8.24	9.61	1.37	13.29
ILMN_1660794	LBH	PREDICTED: hypothetical protein DKFZp566J091 (LBH), mRNA.	XM_001132517.1	6.14	7.55	1.41	13.28
ILMN_2115005	FGD2	FYVE, RhoGEF and PH domain containing 2 (FGD2), mRNA.	NM_173558.2	6.59	8.12	1.52	13.27
ILMN_1764201	MAP2	microtubule-associated protein 2 (MAP2), transcript variant 2, mRNA.	NM_031845.2	6.8	8.21	1.41	13.27
ILMN_1677636	COMP	cartilage oligomeric matrix protein (COMP), mRNA.	NM_000095.2	5.67	7.11	1.44	13.22
ILMN_1759598	DLX5	distal-less homeobox 5 (DLX5), mRNA.	NM_005221.5	7.66	8.83	1.17	13.21
ILMN_1790338	PRRX2	paired related homeobox 2 (PRRX2), mRNA.	NM_016307.3	5.91	7.39	1.48	13.21
ILMN_1664016	ARHGEF18	rho/rac guanine nucleotide exchange factor (GEF) 18 (ARHGEF18), mRNA.	NM_015318.2	11.76	12.7	0.94	13.21
ILMN_1726893	EPN3	epsin 3 (EPN3), mRNA.	NM_017957.1	8.84	7.22	-1.63	13.08
ILMN_1699695	TNFRSF21	tumor necrosis factor receptor superfamily, member 21 (TNFRSF21), mRNA.	NM_014452.3	11.28	12.71	1.42	13.08
ILMN_1689306	TMC7	transmembrane channel-like 7 (TMC7), mRNA.	NM_024847.2	7.28	8.53	1.26	12.96
ILMN_2330787	FRMD6	FERM domain containing 6 (FRMD6), transcript variant 2, mRNA.	NM_152330.3	9.78	10.94	1.17	12.9
ILMN_1713952	C1orf106	chromosome 1 open reading frame 106 (C1orf106), mRNA.	NM_018265.1	11.08	12.23	1.15	12.89
ILMN_1705442	CMTM3	CKLF-like MARVEL transmembrane domain containing 3 (CMTM3), transcript variant 1, mRNA.	NM_144601.2	8.39	9.54	1.15	12.83
ILMN_2414325	TNFAIP8	tumor necrosis factor, alpha-induced protein 8 (TNFAIP8), transcript variant 2, mRNA.	NM_001077654.1	8.63	9.79	1.16	12.77
ILMN_1651365	ZBED2	zinc finger, BED-type containing 2 (ZBED2), mRNA.	NM_024508.3	10.42	11.55	1.12	12.74
ILMN_1676413	VSNL1	visinin-like 1 (VSNL1), mRNA.	NM_003385.4	10.09	8.99	-1.1	12.71
ILMN_1789846	ITGB6	integrin, beta 6 (ITGB6), mRNA.	NM_000888.3	6.03	7.64	1.61	12.68
ILMN_1745623	EFCAB4A	EF-hand calcium binding domain 4A (EFCAB4A), mRNA.	NM_173584.3	8.84	9.87	1.04	12.62
ILMN_1797776	PRSS23	protease, serine, 23 (PRSS23), mRNA.	NM_007173.4	9.51	10.73	1.21	12.57
ILMN_1812073	ATP6V1B1	ATPase, H+ transporting, lysosomal 56/58kDa, V1 subunit B1 (Renal tubular acidosis with deafness) (ATP6V1B1), mRNA.	NM_001692.3	10.85	8.86	-2	12.56
ILMN_1735052	ULK1	unc-51-like kinase 1 (C. elegans) (ULK1), mRNA.	NM_003565.1	11.82	12.84	1.02	12.48
ILMN_1685663	CYP24A1	cytochrome P450, family 24, subfamily A, polypeptide 1 (CYP24A1), nuclear gene encoding mitochondrial protein, mRNA.	NM_000782.3	5.6	6.63	1.03	12.38
ILMN_1677432	SRGAP1	SLIT-ROBO Rho GTPase activating protein 1 (SRGAP1), mRNA.	NM_020762.1	8.55	9.78	1.22	12.38
ILMN_1801216	S100P	S100 calcium binding protein P (S100P), mRNA.	NM_005980.2	8.27	9.71	1.44	12.36
ILMN_1706505	COL5A1	collagen, type V, alpha 1 (COL5A1), mRNA.	NM_000093.3	6.73	8.1	1.37	12.32
ILMN_2388397	LYPD1	LY6/PLAUR domain containing 1 (LYPD1), transcript variant 2, mRNA.	NM_001077427.2	7.54	8.67	1.13	12.22
ILMN_1663092	CITED2	Cbp/p300-interacting transactivator, with Glu/Asp-rich carboxy-terminal domain, 2 (CITED2), mRNA.	NM_006079.3	9.12	7.87	-1.25	12.21
ILMN_1684554	COL16A1	collagen, type XVI, alpha 1 (COL16A1), mRNA.	NM_001856.3	8.49	9.54	1.05	12.14
ILMN_1799848	ANKRD22	ankyrin repeat domain 22 (ANKRD22), mRNA.	NM_144590.2	8.33	6.72	-1.61	12.13
ILMN_2205963	C10orf54	chromosome 10 open reading frame 54 (C10orf54), mRNA.	NM_022153.1	10	8.99	-1.01	12.13
ILMN_2355831	FHL2	four and a half LIM domains 2 (FHL2), transcript variant 2, mRNA.	NM_201555.1	11.88	12.88	1.01	12.02
ILMN_2362902	RASSF5	Ras association (RalGDS/AF-6) domain family member 5 (RASSF5), transcript variant 2, mRNA.	NM_182664.2	9.34	8.05	-1.28	12
ILMN_1796925	CXADR	coxsackie virus and adenovirus receptor (CXADR), mRNA.	NM_001338.3	10.46	9.22	-1.23	11.88
ILMN_1795285	PHF15	PHD finger protein 15 (PHF15), mRNA.	NM_015288.4	8.93	7.71	-1.22	11.88
ILMN_2132599	ANKRD22	ankyrin repeat domain 22 (ANKRD22), mRNA.	NM_144590.1	8.8	7.19	-1.61	11.86
ILMN_1746085	IGFBP3	insulin-like growth factor binding protein 3 (IGFBP3), transcript variant 2, mRNA.	NM_000598.4	10.44	9.52	-0.92	11.85
ILMN_1719543	MAF	v-maf musculoaponeurotic fibrosarcoma oncogene homolog (avian) (MAF), transcript variant 1, mRNA.	NM_005360.3	7.91	9.09	1.18	11.84
ILMN_1686116	THBS1	thrombospondin 1 (THBS1), mRNA.	NM_003246.2	11.1	12.8	1.7	11.8
ILMN_1653836	C11orf41	chromosome 11 open reading frame 41 (C11orf41), mRNA.	NM_012194.1	6.41	7.47	1.06	11.76
ILMN_1700024	UST	uronyl-2-sulfotransferase (UST), mRNA.	NM_005715.1	7.96	6.78	-1.18	11.72
ILMN_1753439	RPTN	PREDICTED: repetin (RPTN), mRNA.	XM_937200.2	6.73	8.04	1.31	11.72
ILMN_2384056	GPER	G protein-coupled estrogen receptor 1 (GPER), transcript variant 3, mRNA.	NM_001039966.1	8.35	6.94	-1.41	11.67
ILMN_1711894	MYB	v-myb myeloblastosis viral oncogene homolog (avian) (MYB), mRNA.	NM_005375.2	7.42	6.24	-1.18	11.67
ILMN_1664912	IL11RA	interleukin 11 receptor, alpha (IL11RA), transcript variant 1, mRNA.	NM_004512.3	9.69	8.58	-1.12	11.52
ILMN_1668863	LYPD1	LY6/PLAUR domain containing 1 (LYPD1), transcript variant 1, mRNA.	NM_144586.5	8.15	9.58	1.44	11.52
ILMN_2327860	MAL	mal, T-cell differentiation protein (MAL), transcript variant d, mRNA.	NM_022440.1	10.46	8.59	-1.88	11.51
ILMN_1705144	ULK1	unc-51-like kinase 1 (C. elegans) (ULK1), mRNA.	NM_003565.1	11.79	12.83	1.04	11.51
ILMN_2091347	IDH1	isocitrate dehydrogenase 1 (NADP+), soluble (IDH1), mRNA.	NM_005896.2	11.53	10.57	-0.97	11.38
ILMN_1784300	TUBA4A	tubulin, alpha 4a (TUBA4A), mRNA.	NM_006000.1	11.34	12.34	1	11.35
ILMN_1699631	GATS	opposite strand transcription unit to STAG3 (GATS), mRNA.	NM_178831.4	9.01	7.79	-1.22	11.34
ILMN_1759676	HOXC13	homeobox C13 (HOXC13), mRNA.	NM_017410.2	10.74	9.61	-1.13	11.34
ILMN_1688480	CCND1	cyclin D1 (CCND1), mRNA.	NM_053056.2	13.05	13.98	0.93	11.34
ILMN_1808220	LCE3E	late cornified envelope 3E (LCE3E), mRNA.	NM_178435.2	5.71	6.92	1.21	11.32
ILMN_1743130	PTGFRN	prostaglandin F2 receptor negative regulator (PTGFRN), mRNA.	NM_020440.2	9.8	10.86	1.06	11.32
ILMN_2405254	GRB7	growth factor receptor-bound protein 7 (GRB7), transcript variant 2, mRNA.	NM_001030002.1	9.18	8.08	-1.1	11.25
ILMN_2142353	GRTP1	growth hormone regulated TBC protein 1 (GRTP1), mRNA.	NM_024719.2	9.18	8.01	-1.17	11.25
ILMN_2082209	C20orf100	chromosome 20 open reading frame 100 (C20orf100), mRNA.	NM_032883.1	9.88	10.76	0.88	11.24
ILMN_1722089	RNF217	ring finger protein 217 (RNF217), mRNA.	NM_152553.2	7.87	9.22	1.35	11.22
ILMN_1736760	KRT16	keratin 16 (focal non-epidermolytic palmoplantar keratoderma) (KRT16), mRNA.	NM_005557.2	8.44	9.73	1.29	11.21
ILMN_1707695	IFIT1	interferon-induced protein with tetratricopeptide repeats 1 (IFIT1), transcript variant 2, mRNA.	NM_001548.3	9.15	7.67	-1.48	11.19
ILMN_1838691		BX116929 Soares_multiple_sclerosis_2NbHMSP cDNA clone IMAGp998E17622, mRNA sequence		7.75	9.04	1.29	11.1
ILMN_1737314	BCL6	B-cell CLL/lymphoma 6 (zinc finger protein 51) (BCL6), transcript variant 1, mRNA.	NM_001706.2	10.05	9.01	-1.04	11.07
ILMN_2153332	ATXN1	ataxin 1 (ATXN1), mRNA.	NM_000332.2	8.31	9.75	1.44	11.05
ILMN_1791328	STK39	serine threonine kinase 39 (STE20/SPS1 homolog, yeast) (STK39), mRNA.	NM_013233.2	10.67	9.79	-0.88	10.95
ILMN_1671365	PRODH	proline dehydrogenase (oxidase) 1 (PRODH), nuclear gene encoding mitochondrial protein, mRNA.	NM_016335.2	8.39	7.08	-1.31	10.93
ILMN_1703593	BAIAP2L1	BAI1-associated protein 2-like 1 (BAIAP2L1), mRNA.	NM_018842.3	10.4	11.3	0.89	10.92
ILMN_1712431	FAM113B	family with sequence similarity 113, member B (FAM113B), mRNA.	NM_138371.1	9.2	10.19	0.99	10.85
ILMN_1769282	FRMD6	FERM domain containing 6 (FRMD6), mRNA.	NM_152330.2	11.3	12.41	1.11	10.81
ILMN_1748970	ATAD4	ATPase family, AAA domain containing 4 (ATAD4), mRNA.	NM_024320.2	9.08	7.77	-1.3	10.78
ILMN_1807767	KIAA0182	KIAA0182 (KIAA0182), mRNA.	NM_014615.1	9.92	9.07	-0.86	10.76
ILMN_1796335	LPCAT2	lysophosphatidylcholine acyltransferase 2 (LPCAT2), mRNA.	NM_017839.3	9.06	10.19	1.12	10.69
ILMN_1742461	UAP1	UDP-N-acteylglucosamine pyrophosphorylase 1 (UAP1), mRNA.	NM_003115.3	8.12	9.34	1.23	10.64
ILMN_2352090	GPRC5C	G protein-coupled receptor, family C, group 5, member C (GPRC5C), transcript variant 2, mRNA.	NM_018653.3	10.55	9.62	-0.93	10.62
ILMN_2261076	NEDD9	neural precursor cell expressed, developmentally down-regulated 9 (NEDD9), transcript variant 1, mRNA.	NM_006403.2	7.9	9.19	1.29	10.57
ILMN_2308849	MYADM	myeloid-associated differentiation marker (MYADM), transcript variant 4, mRNA.	NM_001020820.1	10.58	11.71	1.13	10.53
ILMN_1682139	RAI14	retinoic acid induced 14 (RAI14), mRNA.	NM_015577.1	8.31	9.28	0.98	10.5
ILMN_1674135	RALGPS1	Ral GEF with PH domain and SH3 binding motif 1 (RALGPS1), mRNA.	NM_014636.1	10.21	9.04	-1.18	10.49
ILMN_1746243	TES	testis derived transcript (3 LIM domains) (TES), transcript variant 1, mRNA.	NM_015641.2	8.56	9.8	1.25	10.48
ILMN_2146761	FABP5	fatty acid binding protein 5 (psoriasis-associated) (FABP5), mRNA.	NM_001444.1	8.55	9.78	1.22	10.44
ILMN_1784608	CLEC2B	C-type lectin domain family 2, member B (CLEC2B), mRNA.	NM_005127.2	7.74	6.51	-1.23	10.33
ILMN_1715684	LAMB3	laminin, beta 3 (LAMB3), transcript variant 1, mRNA.	NM_000228.2	12.51	13.39	0.88	10.31
ILMN_2222880	SLC25A42	solute carrier family 25, member 42 (SLC25A42), mRNA.	NM_178526.1	9.07	8.26	-0.81	10.3
ILMN_1751464	TNFSF9	tumor necrosis factor (ligand) superfamily, member 9 (TNFSF9), mRNA.	NM_003811.2	8.11	6.92	-1.19	10.28
ILMN_2399919	MLXIPL	MLX interacting protein-like (MLXIPL), transcript variant 3, mRNA.	NM_032953.2	7.22	6.17	-1.05	10.23
ILMN_1679051	PTPRR	protein tyrosine phosphatase, receptor type, R (PTPRR), transcript variant 1, mRNA.	NM_002849.2	6.81	8.43	1.62	10.22
ILMN_1652762	HIC2	hypermethylated in cancer 2 (HIC2), mRNA.	NM_015094.2	9.74	8.78	-0.96	10.14
ILMN_1717326	SLC29A3	solute carrier family 29 (nucleoside transporters), member 3 (SLC29A3), mRNA.	NM_018344.3	8.62	7.59	-1.04	10.1
ILMN_1725946	IRF6	interferon regulatory factor 6 (IRF6), mRNA.	NM_006147.2	10.87	11.7	0.83	10.1
ILMN_1748685	TRIM31	tripartite motif-containing 31 (TRIM31), mRNA.	NM_007028.3	7.46	6.39	-1.06	10.02
ILMN_2169261	TNNI2	troponin I type 2 (skeletal, fast) (TNNI2), mRNA.	NM_003282.2	8.25	7.16	-1.09	10
ILMN_1676192	SLC13A5	solute carrier family 13 (sodium-dependent citrate transporter), member 5 (SLC13A5), mRNA.	NM_177550.2	5.85	7.07	1.22	9.98
ILMN_1872032		AGENCOURT_10400346 NIH_MGC_82 cDNA clone IMAGE:6616124 5, mRNA sequence		7.33	8.19	0.86	9.91
ILMN_1863962		BX116033 NCI_CGAP_Lu24 cDNA clone IMAGp998A155622, mRNA sequence		7.93	6.84	-1.09	9.88
ILMN_2094396	LRRC8C	leucine rich repeat containing 8 family, member C (LRRC8C), mRNA.	NM_032270.2	7.54	9.07	1.53	9.84
ILMN_1679782	BLOC1S2	biogenesis of lysosome-related organelles complex-1, subunit 2 (BLOC1S2), transcript variant 2, mRNA.	NM_001001342.1	7.03	8.09	1.07	9.78
ILMN_2397028	SERPINB8	serpin peptidase inhibitor, clade B (ovalbumin), member 8 (SERPINB8), transcript variant 1, mRNA.	NM_002640.3	8.89	9.91	1.02	9.76
ILMN_1691410	BAMBI	BMP and activin membrane-bound inhibitor homolog (Xenopus laevis) (BAMBI), mRNA.	NM_012342.2	7.58	9.26	1.68	9.74
ILMN_1690064	RUNDC2C	RUN domain containing 2C (RUNDC2C) on chromosome 16.	NR_002939.2	7.54	8.67	1.13	9.74
ILMN_1673548	HSPC159	galectin-related protein (HSPC159), mRNA.	NM_014181.1	8.14	9.1	0.97	9.7
ILMN_1772686	FGD3	FYVE, RhoGEF and PH domain containing 3 (FGD3), transcript variant 2, mRNA.	NM_033086.2	8.03	6.94	-1.09	9.68
ILMN_1810942	CYP3A5	cytochrome P450, family 3, subfamily A, polypeptide 5 (CYP3A5), mRNA.	NM_000777.2	7.14	5.85	-1.29	9.68
ILMN_1693004	C20orf117	chromosome 20 open reading frame 117 (C20orf117), transcript variant 2, mRNA.	NM_199181.2	9.17	8.2	-0.97	9.67
ILMN_1690170	CRABP2	cellular retinoic acid binding protein 2 (CRABP2), mRNA.	NM_001878.2	9.84	8.83	-1.01	9.67
ILMN_1910908		RST24587 Athersys RAGE Library cDNA, mRNA sequence		6.09	7.11	1.03	9.66
ILMN_1815032	SOX7	SRY (sex determining region Y)-box 7 (SOX7), mRNA.	NM_031439.2	9.11	7.91	-1.2	9.63
ILMN_1738578	FILIP1L	filamin A interacting protein 1-like (FILIP1L), transcript variant 2, mRNA.	NM_014890.2	8.1	9.32	1.22	9.63
ILMN_1813704	KIAA1199	KIAA1199 (KIAA1199), mRNA.	NM_018689.1	7.48	8.68	1.19	9.63
ILMN_1788931	DOCK8	dedicator of cytokinesis 8 (DOCK8), mRNA.	NM_203447.1	7.04	5.92	-1.12	9.6
ILMN_1694106	GPD1L	glycerol-3-phosphate dehydrogenase 1-like (GPD1L), mRNA.	NM_015141.2	10.12	9.17	-0.95	9.56
ILMN_1754114	FLJ20021	PREDICTED: hypothetical LOC90024 (FLJ20021), mRNA.	XM_028217.4	8.24	9.12	0.88	9.56
ILMN_2364131	C20orf121	chromosome 20 open reading frame 121 (C20orf121), transcript variant 1, mRNA.	NM_024331.3	10.15	11.1	0.95	9.5
ILMN_1714600	NAV3	neuron navigator 3 (NAV3), mRNA.	NM_014903.4	6.39	7.74	1.35	9.49
ILMN_1732296	ID3	inhibitor of DNA binding 3, dominant negative helix-loop-helix protein (ID3), mRNA.	NM_002167.2	11.63	10.65	-0.98	9.47
ILMN_1658847	MGC61598	PREDICTED: similar to ankyrin-repeat protein Nrarp (MGC61598), mRNA.	XM_939432.1	10.58	9.52	-1.06	9.46
ILMN_1666222	PHACTR3	phosphatase and actin regulator 3 (PHACTR3), transcript variant 3, mRNA.	NM_183246.1	5.87	6.95	1.07	9.44
ILMN_2387952	FAM134B	family with sequence similarity 134, member B (FAM134B), transcript variant 1, mRNA.	NM_001034850.1	9.21	8.25	-0.97	9.36
ILMN_1806023	JUN	jun oncogene (JUN), mRNA.	NM_002228.3	9.03	10.29	1.26	9.36
ILMN_1735658	RTTN	rotatin (RTTN), mRNA.	NM_173630.2	9.75	10.65	0.91	9.33
ILMN_2358540	RBMS1	RNA binding motif, single stranded interacting protein 1 (RBMS1), transcript variant 3, mRNA.	NM_002897.3	10.19	11.07	0.88	9.28
ILMN_2157075	LRCH4	leucine-rich repeats and calponin homology (CH) domain containing 4 (LRCH4), mRNA.	NM_002319.3	8.25	7.33	-0.92	9.19
ILMN_1809433	XBP1	X-box binding protein 1 (XBP1), transcript variant 1, mRNA.	NM_005080.2	11.88	12.89	1.01	9.17
ILMN_1663787	KLK3	kallikrein-related peptidase 3 (KLK3), transcript variant 6, mRNA.	NM_001030050.1	6.36	7.68	1.32	9.13
ILMN_1701308	COL1A1	collagen, type I, alpha 1 (COL1A1), mRNA.	NM_000088.3	6.42	7.49	1.07	9.1
ILMN_1796737	APM-1	PREDICTED: BTB/POZ-zinc finger protein-like (APM-1), mRNA.	XM_113971.4	7.31	6.1	-1.21	9.07
ILMN_1798256	UPP1	uridine phosphorylase 1 (UPP1), transcript variant 1, mRNA.	NM_003364.2	11.69	12.52	0.83	9.05
ILMN_1693338	CYP1B1	cytochrome P450, family 1, subfamily B, polypeptide 1 (CYP1B1), mRNA.	NM_000104.2	10.85	9.25	-1.6	9.04
ILMN_1653856	STS-1	Cbl-interacting protein Sts-1 (STS-1), mRNA.	NM_032873.3	9.23	10.48	1.25	9.04
ILMN_2320330	MAL	mal, T-cell differentiation protein (MAL), transcript variant a, mRNA.	NM_002371.2	8.48	7.08	-1.4	9.01
ILMN_1689378	CCRN4L	CCR4 carbon catabolite repression 4-like (S. cerevisiae) (CCRN4L), mRNA.	NM_012118.2	6.76	8.08	1.32	8.98
ILMN_1653824	LAMC2	laminin, gamma 2 (LAMC2), transcript variant 1, mRNA.	NM_005562.1	9.23	10.73	1.49	8.94
ILMN_1772876	ZNF395	zinc finger protein 395 (ZNF395), mRNA.	NM_018660.2	10.14	9.16	-0.98	8.93
ILMN_1656910	TRIM6	tripartite motif-containing 6 (TRIM6), transcript variant 2, mRNA.	NM_058166.3	8.58	7.53	-1.06	8.93
ILMN_1744442	C20orf121	chromosome 20 open reading frame 121 (C20orf121), transcript variant 2, mRNA.	NM_001039199.1	9.07	10.05	0.98	8.93
ILMN_2148193	MPPED2	metallophosphoesterase domain containing 2 (MPPED2), mRNA.	NM_001584.1	8.24	6.68	-1.56	8.92
ILMN_1715133	IVNS1ABP	influenza virus NS1A binding protein (IVNS1ABP), transcript variant 2, mRNA.	NM_016389.2	6.57	7.75	1.18	8.9
ILMN_1718960	SERPINB8	serpin peptidase inhibitor, clade B (ovalbumin), member 8 (SERPINB8), transcript variant 2, mRNA.	NM_198833.1	8.74	9.78	1.04	8.85
ILMN_1655930	ELL2	elongation factor, RNA polymerase II, 2 (ELL2), mRNA.	NM_012081.4	9.22	10.2	0.98	8.82
ILMN_1655126	PI4KAP2	phosphatidylinositol 4-kinase, catalytic, alpha polypeptide pseudogene 2 (PI4KAP2), mRNA.	NM_199345.3	10.03	9.2	-0.83	8.81
ILMN_1730794	SERTAD4	SERTA domain containing 4 (SERTAD4), mRNA.	NM_019605.2	8.21	9.32	1.11	8.79
ILMN_1666392	WNT4	wingless-type MMTV integration site family, member 4 (WNT4), mRNA.	NM_030761.3	6.68	7.8	1.13	8.78
ILMN_1856480		cDNA clone IMAGE:5263177		9.52	8.53	-0.98	8.72
ILMN_1678087	MAP3K4	mitogen-activated protein kinase kinase kinase 4 (MAP3K4), transcript variant 1, mRNA.	NM_005922.2	10.37	11.21	0.84	8.72
ILMN_1785900	LOC653108	PREDICTED: similar to coxsackie virus and adenovirus receptor precursor (LOC653108), mRNA.	XR_016129.1	8.39	7.5	-0.89	8.68
ILMN_1809364	NTF3	neurotrophin 3 (NTF3), mRNA.	NM_002527.3	7.29	6.21	-1.08	8.66
ILMN_1709067	SAMD11	sterile alpha motif domain containing 11 (SAMD11), mRNA.	NM_152486.2	6.25	7.33	1.09	8.66
ILMN_2197365	RGS2	regulator of G-protein signalling 2, 24kDa (RGS2), mRNA.	NM_002923.1	10.08	8.97	-1.11	8.62
ILMN_1713813	LOC400578	PREDICTED: similar to Keratin, type I cytoskeletal 14 (Cytokeratin-14) (CK-14) (Keratin-14) (K14) (LOC400578), mRNA.	XR_017543.1	8.89	10.02	1.14	8.62
ILMN_1809522	BTBD14A	BTB (POZ) domain containing 14A (BTBD14A), mRNA.	NM_144653.3	9.38	10.2	0.82	8.61
ILMN_1769694	ACCN2	amiloride-sensitive cation channel 2, neuronal (ACCN2), transcript variant 2, mRNA.	NM_001095.2	8.07	7.02	-1.05	8.6
ILMN_2195703	PPARGC1B	peroxisome proliferator-activated receptor gamma, coactivator 1 beta (PPARGC1B), mRNA.	NM_133263.2	7.18	6.2	-0.98	8.59
ILMN_2041190	F2RL1	coagulation factor II (thrombin) receptor-like 1 (F2RL1), mRNA.	NM_005242.3	10.22	11.02	0.8	8.59
ILMN_1735788	TRIOBP	TRIO and F-actin binding protein (TRIOBP), transcript variant 6, mRNA.	NM_001039141.1	10.02	10.8	0.78	8.56
ILMN_1777513	KCTD11	potassium channel tetramerisation domain containing 11 (KCTD11), mRNA.	NM_001002914.2	7.91	8.91	1	8.55
ILMN_1736441	PDXP	pyridoxal (pyridoxine, vitamin B6) phosphatase (PDXP), mRNA.	NM_020315.4	9.8	8.96	-0.84	8.54
ILMN_1788107	IL11	interleukin 11 (IL11), mRNA.	NM_000641.2	6.78	7.84	1.06	8.54
ILMN_1726245	TGFBR2	transforming growth factor, beta receptor II (70/80kDa) (TGFBR2), transcript variant 1, mRNA.	NM_001024847.2	9.01	9.92	0.91	8.54
ILMN_1821176		601441142F1 NIH_MGC_72 cDNA clone IMAGE:3915971 5, mRNA sequence		7.59	6.67	-0.92	8.51
ILMN_1673566	ADAMTS1	ADAM metallopeptidase with thrombospondin type 1 motif, 1 (ADAMTS1), mRNA.	NM_006988.3	7.72	8.83	1.11	8.48
ILMN_1739428	IFIT2	interferon-induced protein with tetratricopeptide repeats 2 (IFIT2), mRNA.	NM_001547.4	9.96	8.78	-1.18	8.44
ILMN_1720710	HSPB3	heat shock 27kDa protein 3 (HSPB3), mRNA.	NM_006308.1	7.42	8.36	0.94	8.44
ILMN_1695475	SEMA3C	sema domain, immunoglobulin domain (Ig), short basic domain, secreted, (semaphorin) 3C (SEMA3C), mRNA.	NM_006379.2	7.79	9.1	1.3	8.39
ILMN_1708341	PDZK1	PDZ domain containing 1 (PDZK1), mRNA.	NM_002614.3	6.52	7.49	0.97	8.33
ILMN_2052208	GADD45A	growth arrest and DNA-damage-inducible, alpha (GADD45A), mRNA.	NM_001924.2	10.16	10.93	0.76	8.3
ILMN_1715647	VANGL2	vang-like 2 (van gogh, Drosophila) (VANGL2), mRNA.	NM_020335.1	8.79	7.92	-0.86	8.25
ILMN_1708223	PAK6	p21(CDKN1A)-activated kinase 6 (PAK6), mRNA.	NM_020168.3	9.42	8.33	-1.1	8.18
ILMN_2360202	PPP2R2B	protein phosphatase 2 (formerly 2A), regulatory subunit B, beta isoform (PPP2R2B), transcript variant 4, mRNA.	NM_181676.1	8.69	7.68	-1.01	8.16
ILMN_1800540	CD55	CD55 molecule, decay accelerating factor for complement (Cromer blood group) (CD55), mRNA.	NM_000574.2	8.22	9.25	1.04	8.16
ILMN_2384241	TGFBR2	transforming growth factor, beta receptor II (70/80kDa) (TGFBR2), transcript variant 1, mRNA.	NM_001024847.1	9.83	10.75	0.92	8.16
ILMN_1770338	TM4SF1	transmembrane 4 L six family member 1 (TM4SF1), mRNA.	NM_014220.2	13.62	12.89	-0.73	8.14
ILMN_1808999	ARHGEF19	Rho guanine nucleotide exchange factor (GEF) 19 (ARHGEF19), mRNA.	NM_153213.3	9.81	8.89	-0.92	8.13
ILMN_2134056	SOX7	SRY (sex determining region Y)-box 7 (SOX7), mRNA.	NM_031439.2	8.63	7.56	-1.07	8.1
ILMN_1742151	NRG2	neuregulin 2 (NRG2), transcript variant 6, mRNA.	NM_013985.1	6.62	5.76	-0.85	8.07
ILMN_2184612	C3orf52	chromosome 3 open reading frame 52 (C3orf52), mRNA.	NM_024616.1	8.13	9.09	0.97	8.07
ILMN_1810962	PTPRK	protein tyrosine phosphatase, receptor type, K (PTPRK), mRNA.	NM_002844.2	10.37	11.44	1.07	8.05
ILMN_1662188	WNT11	wingless-type MMTV integration site family, member 11 (WNT11), mRNA.	NM_004626.2	5.95	6.94	0.98	8.04
ILMN_1653934	LOC650517	PREDICTED: hypothetical LOC650517 (LOC650517), mRNA.	XR_019109.1	9.66	10.76	1.1	8.04
ILMN_1730351	FLJ35767	FLJ35767 protein (FLJ35767), mRNA.	NM_207459.1	7.98	6.89	-1.08	8.02
ILMN_1739222	ETV5	ets variant gene 5 (ets-related molecule) (ETV5), mRNA.	NM_004454.1	7.97	8.99	1.03	8.02
ILMN_1752520	SLFN11	schlafen family member 11 (SLFN11), mRNA.	NM_152270.2	9.01	8.13	-0.88	7.87
ILMN_2086077	JUNB	jun B proto-oncogene (JUNB), mRNA.	NM_002229.2	7.9	8.73	0.83	7.86
ILMN_2374865	ATF3	activating transcription factor 3 (ATF3), transcript variant 4, mRNA.	NM_001040619.1	7.23	8.56	1.34	7.85
ILMN_1730906	FILIP1L	filamin A interacting protein 1-like (FILIP1L), transcript variant 1, mRNA.	NM_182909.2	8.01	9	0.99	7.85
ILMN_1669605	LOC646609	PREDICTED: similar to Chloride intracellular channel protein 4 (Intracellular chloride ion channel protein p64H1) (LOC646609), mRNA.	XM_929546.1	6.05	7.05	1	7.84
ILMN_2359345	NET1	neuroepithelial cell transforming gene 1 (NET1), transcript variant 2, mRNA.	NM_005863.3	9.61	10.48	0.87	7.84
ILMN_1670158	FAM83A	family with sequence similarity 83, member A (FAM83A), transcript variant 2, mRNA.	NM_207006.1	8.19	9.15	0.95	7.83
ILMN_1748206	C20orf160	chromosome 20 open reading frame 160 (C20orf160), mRNA.	NM_080625.2	5.75	6.45	0.7	7.81
ILMN_1682717	IER3	immediate early response 3 (IER3), mRNA.	NM_003897.3	10.2	11.24	1.04	7.81
ILMN_1722834	RGS12	regulator of G-protein signaling 12 (RGS12), transcript variant 2, mRNA.	NM_002926.3	9.85	10.62	0.77	7.8
ILMN_1770850	PNMA1	paraneoplastic antigen MA1 (PNMA1), mRNA.	NM_006029.4	8.2	9.25	1.05	7.78
ILMN_1822484		603038678F1 NIH_MGC_115 cDNA clone IMAGE:5179554 5, mRNA sequence		5.87	6.77	0.9	7.78
ILMN_1673491	LRAT	lecithin retinol acyltransferase (phosphatidylcholine--retinol O-acyltransferase) (LRAT), mRNA.	NM_004744.3	6.53	7.46	0.93	7.75
ILMN_1778575	WNT7A	wingless-type MMTV integration site family, member 7A (WNT7A), mRNA.	NM_004625.3	8.09	8.99	0.89	7.73
ILMN_1798360	CXCR7	chemokine (C-X-C motif) receptor 7 (CXCR7), mRNA.	NM_020311.2	11.73	12.61	0.87	7.71
ILMN_1801068	DACT1	dapper, antagonist of beta-catenin, homolog 1 (Xenopus laevis) (DACT1), mRNA.	NM_016651.4	6.01	7.05	1.05	7.63
ILMN_1712896	FST	follistatin (FST), transcript variant FST317, mRNA.	NM_006350.2	8.79	9.86	1.07	7.63
ILMN_2088124	TMEM154	transmembrane protein 154 (TMEM154), mRNA.	NM_152680.1	9.95	10.77	0.82	7.63
ILMN_2388484	MAP2	microtubule-associated protein 2 (MAP2), transcript variant 1, mRNA.	NM_002374.3	6.95	8.01	1.07	7.61
ILMN_2179778	PHLDB2	pleckstrin homology-like domain, family B, member 2 (PHLDB2), mRNA.	NM_145753.1	8.79	9.98	1.18	7.59
ILMN_1695590	ADRB2	adrenergic, beta-2-, receptor, surface (ADRB2), mRNA.	NM_000024.4	9.13	8.21	-0.92	7.55
ILMN_2325347	B3GALNT1	beta-1,3-N-acetylgalactosaminyltransferase 1 (globoside blood group) (B3GALNT1), transcript variant 3, mRNA.	NM_033168.2	7.51	6.71	-0.79	7.54
ILMN_1728298	SBK1	SH3-binding domain kinase 1 (SBK1), mRNA.	NM_001024401.2	7.92	7.19	-0.72	7.52
ILMN_1750748	MGC102966	PREDICTED: similar to Keratin, type I cytoskeletal 16 (Cytokeratin-16) (CK-16) (Keratin-16) (K16) (MGC102966), misc RNA.	XR_015970.1	9.36	10.43	1.07	7.52
ILMN_1673752	C1orf91	chromosome 1 open reading frame 91 (C1orf91), mRNA.	NM_019118.2	7.15	8.03	0.88	7.48
ILMN_1698020	DLC1	deleted in liver cancer 1 (DLC1), transcript variant 3, mRNA.	NM_024767.2	7.43	8.5	1.07	7.47
ILMN_1662795	CA2	carbonic anhydrase II (CA2), mRNA.	NM_000067.1	14.23	13.56	-0.68	7.45
ILMN_1717877	IVNS1ABP	influenza virus NS1A binding protein (IVNS1ABP), mRNA.	NM_006469.4	9.17	10.48	1.31	7.41
ILMN_2111237	MN1	meningioma (disrupted in balanced translocation) 1 (MN1), mRNA.	NM_002430.2	8.75	9.52	0.77	7.4
ILMN_1806651	PARP8	poly (ADP-ribose) polymerase family, member 8 (PARP8), mRNA.	NM_024615.2	8.34	9.47	1.13	7.38
ILMN_1854349		cDNA FLJ13522 fis, clone PLACE1005884		7.47	8.33	0.86	7.37
ILMN_1701881	ZNF365	zinc finger protein 365 (ZNF365), transcript variant B, mRNA.	NM_199450.2	6.42	7.36	0.94	7.37
ILMN_1729417	GNE	glucosamine (UDP-N-acetyl)-2-epimerase/N-acetylmannosamine kinase (GNE), mRNA.	NM_005476.3	8.89	7.84	-1.05	7.31
ILMN_2161577	CXCL6	chemokine (C-X-C motif) ligand 6 (granulocyte chemotactic protein 2) (CXCL6), mRNA.	NM_002993.2	7.56	8.46	0.9	7.31
ILMN_1660204	IGSF9B	immunoglobulin superfamily, member 9B (IGSF9B), mRNA.	NM_014987.1	7.16	8.15	0.99	7.3
ILMN_1652237	CBR3	carbonyl reductase 3 (CBR3), mRNA.	NM_001236.3	10.1	8.85	-1.26	7.29
ILMN_1703123	AXUD1	AXIN1 up-regulated 1 (AXUD1), mRNA.	NM_033027.2	8.77	9.47	0.71	7.29
ILMN_1712673	SASH1	SAM and SH3 domain containing 1 (SASH1), mRNA.	NM_015278.3	8.7	7.85	-0.85	7.28
ILMN_1840316		cDNA clone IMAGE:6186815, partial cds		8.83	8.1	-0.72	7.27
ILMN_1685709	TMEM125	transmembrane protein 125 (TMEM125), mRNA.	NM_144626.1	8.84	7.96	-0.88	7.26
ILMN_1725852	S100A2	S100 calcium binding protein A2 (S100A2), mRNA.	NM_005978.3	10.89	11.81	0.92	7.26
ILMN_1692056	HS3ST3A1	heparan sulfate (glucosamine) 3-O-sulfotransferase 3A1 (HS3ST3A1), mRNA.	NM_006042.1	5.86	6.88	1.02	7.26
ILMN_1771800	PRKCA	protein kinase C, alpha (PRKCA), mRNA.	NM_002737.2	6.84	7.66	0.82	7.24
ILMN_1788547	GCLM	glutamate-cysteine ligase, modifier subunit (GCLM), mRNA.	NM_002061.2	11.19	11.99	0.8	7.2
ILMN_2388800	PPAP2B	phosphatidic acid phosphatase type 2B (PPAP2B), transcript variant 1, mRNA.	NM_003713.3	8.18	8.91	0.73	7.19
ILMN_2396875	IGFBP3	insulin-like growth factor binding protein 3 (IGFBP3), transcript variant 1, mRNA.	NM_001013398.1	9.36	8.48	-0.89	7.17
ILMN_1797704	LOC729252	PREDICTED: similar to Keratin, type I cytoskeletal 14 (Cytokeratin-14) (CK-14) (Keratin-14) (K14) (LOC729252), mRNA.	XR_015937.1	8.42	9.43	1.01	7.14
ILMN_1672589	SEMA4B	sema domain, immunoglobulin domain (Ig), transmembrane domain (TM) and short cytoplasmic domain, (semaphorin) 4B (SEMA4B), transcript variant 2, mRNA.	NM_198925.1	10.54	9.86	-0.68	7.1
ILMN_1666819	PHLDB1	pleckstrin homology-like domain, family B, member 1 (PHLDB1), mRNA.	NM_015157.1	11	11.77	0.77	7.1
ILMN_1752269	ACSS1	acyl-CoA synthetase short-chain family member 1 (ACSS1), nuclear gene encoding mitochondrial protein, mRNA.	NM_032501.2	6.84	6	-0.84	7.09
ILMN_2358541	RBMS1	RNA binding motif, single stranded interacting protein 1 (RBMS1), transcript variant 3, mRNA.	NM_002897.3	8.54	9.35	0.81	7.04
ILMN_1753490	C10orf39	chromosome 10 open reading frame 39 (C10orf39), mRNA.	NM_194303.1	6.92	6.14	-0.78	7.03
ILMN_1767662	LASS6	LAG1 homolog, ceramide synthase 6 (LASS6), mRNA.	NM_203463.1	12.1	11.15	-0.95	7.01
ILMN_1792409	AMOT	angiomotin (AMOT), transcript variant 2, mRNA.	NM_133265.2	9.06	7.57	-1.49	6.99
ILMN_2267535	NET1	neuroepithelial cell transforming gene 1 (NET1), transcript variant 2, mRNA.	NM_005863.3	8.86	9.84	0.98	6.99
ILMN_1657679	VAV3	vav 3 guanine nucleotide exchange factor (VAV3), transcript variant 1, mRNA.	NM_006113.4	10.01	8.8	-1.22	6.95
ILMN_1777519	ITGB7	integrin, beta 7 (ITGB7), mRNA.	NM_000889.1	8.63	7.78	-0.85	6.91
ILMN_1751034	LOC162073	hypothetical protein LOC162073 (LOC162073), mRNA.	NM_001034841.2	11.66	12.51	0.86	6.89
ILMN_2233334	MYH16	myosin, heavy chain 16 pseudogene (MYH16) on chromosome 7.	NR_002147.2	6.47	7.26	0.79	6.88
ILMN_1681890	DYNLT3	dynein, light chain, Tctex-type 3 (DYNLT3), mRNA.	NM_006520.1	9.4	10.42	1.02	6.85
ILMN_1779190	ALKBH8	alkB, alkylation repair homolog 8 (E. coli) (ALKBH8), mRNA.	NM_138775.1	8.86	9.94	1.08	6.83
ILMN_1680591	RTKN	rhotekin (RTKN), transcript variant 2, mRNA.	NM_033046.2	11.03	11.76	0.73	6.82
ILMN_1682599	GPRC5A	G protein-coupled receptor, family C, group 5, member A (GPRC5A), mRNA.	NM_003979.3	7.9	8.86	0.96	6.8
ILMN_2129572	F3	coagulation factor III (thromboplastin, tissue factor) (F3), mRNA.	NM_001993.2	10.53	11.35	0.81	6.79
ILMN_1790228	FURIN	furin (paired basic amino acid cleaving enzyme) (FURIN), mRNA.	NM_002569.2	7.4	8.17	0.77	6.75
ILMN_1672660	MBP	myelin basic protein (MBP), transcript variant 8, mRNA.	NM_001025100.1	11.76	11.09	-0.67	6.73
ILMN_2162253	NMU	neuromedin U (NMU), mRNA.	NM_006681.1	11.82	11.07	-0.75	6.73
ILMN_1739594	ACOT11	acyl-CoA thioesterase 11 (ACOT11), transcript variant 2, mRNA.	NM_147161.2	9.24	9.94	0.69	6.72
ILMN_1849494		clone 24841 mRNA sequence		6.2	7.09	0.89	6.69
ILMN_1741404	MSC	musculin (activated B-cell factor-1) (MSC), mRNA.	NM_005098.3	6.04	6.8	0.76	6.67
ILMN_1727805	SYNGR1	synaptogyrin 1 (SYNGR1), transcript variant 1a, mRNA.	NM_004711.3	6.73	6	-0.74	6.66
ILMN_2399523	JAG2	jagged 2 (JAG2), transcript variant 2, mRNA.	NM_145159.1	9.45	8.54	-0.91	6.64
ILMN_1779547	HPSE	heparanase (HPSE), mRNA.	NM_006665.2	7.66	6.76	-0.9	6.58
ILMN_1694268	HES6	hairy and enhancer of split 6 (Drosophila) (HES6), mRNA.	NM_018645.3	8.2	9.08	0.88	6.54
ILMN_2338323	CDC25B	cell division cycle 25 homolog B (S. pombe) (CDC25B), transcript variant 2, mRNA.	NM_004358.3	12.04	11.19	-0.85	6.51
ILMN_1785618	SMTN	smoothelin (SMTN), transcript variant 3, mRNA.	NM_006932.3	7.52	8.45	0.93	6.51
ILMN_1779252	TRIM22	tripartite motif-containing 22 (TRIM22), mRNA.	NM_006074.3	7.44	6.46	-0.98	6.49
ILMN_1809613	NGEF	neuronal guanine nucleotide exchange factor (NGEF), mRNA.	NM_019850.1	7.39	8.27	0.88	6.49
ILMN_1724040	ANKRD57	ankyrin repeat domain 57 (ANKRD57), mRNA.	NM_023016.3	11.04	11.68	0.64	6.47
ILMN_1659599	ADC	arginine decarboxylase (ADC), mRNA.	NM_052998.2	7.35	8.09	0.74	6.44
ILMN_1699989	BNIPL	BCL2/adenovirus E1B 19kD interacting protein like (BNIPL), mRNA.	NM_138278.2	8.6	7.64	-0.96	6.42
ILMN_2199439	CA2	carbonic anhydrase II (CA2), mRNA.	NM_000067.1	13.25	12.61	-0.64	6.42
ILMN_2117323	PIK3C2B	phosphoinositide-3-kinase, class 2, beta polypeptide (PIK3C2B), mRNA.	NM_002646.2	9.2	8.29	-0.91	6.4
ILMN_1659761	SNX29	sorting nexin 29 (SNX29), mRNA.	NM_001080530.2	9	9.66	0.66	6.4
ILMN_2391150	FILIP1L	filamin A interacting protein 1-like (FILIP1L), transcript variant 3, mRNA.	NM_001042459.1	7.39	8.2	0.81	6.36
ILMN_1732410	SLC16A9	solute carrier family 16, member 9 (monocarboxylic acid transporter 9) (SLC16A9), mRNA.	NM_194298.1	7.57	6.74	-0.83	6.35
ILMN_1788203	HEY1	hairy/enhancer-of-split related with YRPW motif 1 (HEY1), transcript variant 2, mRNA.	NM_001040708.1	7.79	8.57	0.78	6.35
ILMN_1748591	ODC1	ornithine decarboxylase 1 (ODC1), mRNA.	NM_002539.1	10.86	11.53	0.68	6.34
ILMN_2137789	KLF4	Kruppel-like factor 4 (gut) (KLF4), mRNA.	NM_004235.3	8.5	9.24	0.74	6.33
ILMN_1777591	C10orf65	chromosome 10 open reading frame 65 (C10orf65), mRNA.	NM_138413.2	7.75	6.66	-1.09	6.32
ILMN_1787718	SLC27A1	solute carrier family 27 (fatty acid transporter), member 1 (SLC27A1), mRNA.	NM_198580.1	8.66	7.83	-0.83	6.3
ILMN_2325185	TYSND1	trypsin domain containing 1 (TYSND1), transcript variant 1, mRNA.	NM_173555.2	8.03	7.17	-0.87	6.3
ILMN_1859908		cDNA clone MGC:13035 IMAGE:3613409, complete cds		9.3	8.67	-0.63	6.3
ILMN_2357730	CCRK	cell cycle related kinase (CCRK), transcript variant 2, mRNA.	NM_012119.3	8.99	8.4	-0.59	6.3
ILMN_1753613	HOXA5	homeobox A5 (HOXA5), mRNA.	NM_019102.2	11.42	10.84	-0.59	6.3
ILMN_2172174	NP	nucleoside phosphorylase (NP), mRNA.	NM_000270.1	9.95	10.72	0.77	6.3
ILMN_2162799	AHR	aryl hydrocarbon receptor (AHR), mRNA.	NM_001621.3	7.65	8.42	0.78	6.3
ILMN_1704571	FAM53B	family with sequence similarity 53, member B (FAM53B), mRNA.	NM_014661.3	9.12	8.31	-0.81	6.26
ILMN_1782050	CEBPD	CCAAT/enhancer binding protein (C/EBP), delta (CEBPD), mRNA.	NM_005195.3	9.52	8.88	-0.64	6.26
ILMN_1811579	HOMER3	homer homolog 3 (Drosophila) (HOMER3), mRNA.	NM_004838.2	8.93	9.58	0.65	6.26
ILMN_1680774	LOC730994	PREDICTED: similar to NACHT, leucine rich repeat and PYD (pyrin domain) containing 1, transcript variant 1 (LOC730994), mRNA.	XM_001132373.1	6.21	7.11	0.9	6.26
ILMN_1895660		K-EST0058554 S13KMS5s1 cDNA clone S13KMS5s1-7-G08 5, mRNA sequence		5.73	6.63	0.9	6.25
ILMN_1723035	OLR1	oxidized low density lipoprotein (lectin-like) receptor 1 (OLR1), mRNA.	NM_002543.3	10.48	11.36	0.88	6.22
ILMN_1849117		mRNA full length insert cDNA clone EUROIMAGE 151432		7.32	6.53	-0.79	6.21
ILMN_1747650	BMP6	bone morphogenetic protein 6 (BMP6), mRNA.	NM_001718.4	6.04	7.05	1.01	6.2
ILMN_2289093	KIAA1618	KIAA1618 (KIAA1618), mRNA.	NM_020954.2	7.26	7.89	0.63	6.19
ILMN_2374249	DYRK2	dual-specificity tyrosine-(Y)-phosphorylation regulated kinase 2 (DYRK2), transcript variant 1, mRNA.	NM_003583.2	9.66	10.31	0.65	6.17
ILMN_1700081	FST	follistatin (FST), transcript variant FST344, mRNA.	NM_013409.1	12.09	12.87	0.78	6.17
ILMN_1758250	TRAFD1	TRAF-type zinc finger domain containing 1 (TRAFD1), mRNA.	NM_006700.1	9.58	8.66	-0.91	6.14
ILMN_2072357	IRF6	interferon regulatory factor 6 (IRF6), mRNA.	NM_006147.2	9.63	10.38	0.75	6.14
ILMN_1669617	GRB10	growth factor receptor-bound protein 10 (GRB10), transcript variant 4, mRNA.	NM_001001555.1	6.48	7.33	0.85	6.13
ILMN_2308903	WFDC3	WAP four-disulfide core domain 3 (WFDC3), transcript variant 2, mRNA.	NM_181522.1	8.38	7.3	-1.08	6.12
ILMN_1655229	SLC7A11	solute carrier family 7, (cationic amino acid transporter, y+ system) member 11 (SLC7A11), mRNA.	NM_014331.3	7.07	7.85	0.78	6.08
ILMN_1727689	TNFAIP2	tumor necrosis factor, alpha-induced protein 2 (TNFAIP2), mRNA.	NM_006291.2	7.2	6.31	-0.89	6.06
ILMN_1724211	GPRC5C	G protein-coupled receptor, family C, group 5, member C (GPRC5C), transcript variant 1, mRNA.	NM_022036.2	8.39	7.55	-0.84	6.06
ILMN_1757298	BTBD7	BTB (POZ) domain containing 7 (BTBD7), transcript variant 2, mRNA.	NM_018167.3	7.85	8.6	0.75	6.06
ILMN_2230566	RAB40B	RAB40B, member RAS oncogene family (RAB40B), mRNA.	NM_006822.1	10.92	10.23	-0.69	6.05
ILMN_1660691	RAB31	RAB31, member RAS oncogene family (RAB31), mRNA.	NM_006868.2	10.11	10.8	0.68	6.01
ILMN_1774874	IL1RN	interleukin 1 receptor antagonist (IL1RN), transcript variant 4, mRNA.	NM_173843.1	10.38	9.61	-0.77	6
ILMN_1672662	SLC20A1	solute carrier family 20 (phosphate transporter), member 1 (SLC20A1), mRNA.	NM_005415.3	11.08	10.09	-0.99	6
ILMN_1754943	MYO1E	myosin IE (MYO1E), mRNA.	NM_004998.2	6.49	7.26	0.78	5.98
ILMN_1784602	CDKN1A	cyclin-dependent kinase inhibitor 1A (p21, Cip1) (CDKN1A), transcript variant 1, mRNA.	NM_000389.2	11.22	11.83	0.61	5.96
ILMN_1770505	BIK	BCL2-interacting killer (apoptosis-inducing) (BIK), mRNA.	NM_001197.3	8.62	7.76	-0.86	5.95
ILMN_1910330		BX116720 Soares_testis_NHT cDNA clone IMAGp998F241782, mRNA sequence		8.01	8.66	0.65	5.95
ILMN_1774077	GBP2	guanylate binding protein 2, interferon-inducible (GBP2), mRNA.	NM_004120.3	7.71	6.75	-0.97	5.92
ILMN_1651498	GADD45G	growth arrest and DNA-damage-inducible, gamma (GADD45G), mRNA.	NM_006705.2	7.8	8.64	0.84	5.88
ILMN_1729987	SRC	v-src sarcoma (Schmidt-Ruppin A-2) viral oncogene homolog (avian) (SRC), transcript variant 2, mRNA.	NM_198291.1	8.85	9.64	0.8	5.88
ILMN_2185984	SASH1	SAM and SH3 domain containing 1 (SASH1), mRNA.	NM_015278.3	8.76	7.92	-0.84	5.87
ILMN_2381257	DSC2	desmocollin 2 (DSC2), transcript variant Dsc2a, mRNA.	NM_024422.2	9.22	9.99	0.77	5.87
ILMN_1675048	IGF1R	insulin-like growth factor 1 receptor (IGF1R), mRNA.	NM_000875.2	6.64	7.46	0.82	5.87
ILMN_1824362		BX105338 Soares_pregnant_uterus_NbHPU cDNA clone IMAGp998C114347, mRNA sequence		7.81	8.74	0.93	5.86
ILMN_1671731	AVPI1	arginine vasopressin-induced 1 (AVPI1), mRNA.	NM_021732.1	11.83	11.23	-0.59	5.82
ILMN_1692539	SH3BP1	SH3-domain binding protein 1 (SH3BP1), mRNA.	NM_018957.3	8.54	7.76	-0.78	5.82
ILMN_1796461	PRSS8	protease, serine, 8 (PRSS8), mRNA.	NM_002773.3	10.96	10.1	-0.85	5.79
ILMN_1765187	LHB	luteinizing hormone beta polypeptide (LHB), mRNA.	NM_000894.2	5.91	6.75	0.85	5.79
ILMN_1739161	PPAP2A	phosphatidic acid phosphatase type 2A (PPAP2A), transcript variant 1, mRNA.	NM_003711.2	6.95	7.66	0.72	5.77
ILMN_1777853	MBOAT2	PREDICTED: membrane bound O-acyltransferase domain containing 2 (MBOAT2), mRNA.	XM_001129292.1	7.01	7.87	0.86	5.76
ILMN_1702933	ADM2	adrenomedullin 2 (ADM2), mRNA.	NM_024866.4	8.33	9.1	0.76	5.75
ILMN_1754753	IL6R	interleukin 6 receptor (IL6R), transcript variant 1, mRNA.	NM_000565.2	6.7	5.93	-0.77	5.74
ILMN_1669982	CCDC85A	coiled-coil domain containing 85A (CCDC85A), mRNA.	NM_001080433.1	7.31	8.23	0.92	5.73
ILMN_1730928	CDK5R1	cyclin-dependent kinase 5, regulatory subunit 1 (p35) (CDK5R1), mRNA.	NM_003885.2	6.74	7.58	0.84	5.73
ILMN_1903914		cDNA FLJ26188 fis, clone ADG04821		7.55	8.47	0.92	5.71
ILMN_1715650	LOC648149	PREDICTED: hypothetical protein LOC648149 (LOC648149), mRNA.	XM_939208.2	6.1	6.97	0.88	5.65
ILMN_1669390	PPP1R13L	protein phosphatase 1, regulatory (inhibitor) subunit 13 like (PPP1R13L), mRNA.	NM_006663.2	8.86	9.74	0.88	5.65
ILMN_2371458	CXCR7	chemokine (C-X-C motif) receptor 7 (CXCR7), transcript variant 1, mRNA.	NM_001047841.1	9.81	10.59	0.78	5.64
ILMN_1659544	STX3	syntaxin 3 (STX3), mRNA.	NM_004177.3	10	9.35	-0.65	5.63
ILMN_1784661	TMEM2	transmembrane protein 2 (TMEM2), mRNA.	NM_013390.1	9.06	9.82	0.76	5.63
ILMN_2157099	CCNA1	cyclin A1 (CCNA1), mRNA.	NM_003914.2	7.35	7.99	0.64	5.6
ILMN_1826572		cDNA FLJ37243 fis, clone BRAMY2004387		6.09	6.74	0.66	5.6
ILMN_1870668		NISC_gj03f04.y1 NCI_CGAP_Pr28 cDNA clone IMAGE:3270678 5, mRNA sequence		7.18	6.54	-0.65	5.59
ILMN_1702255	KCNT1	potassium channel, subfamily T, member 1 (KCNT1), mRNA.	NM_020822.1	5.48	6.22	0.74	5.59
ILMN_1798543	STK17B	serine/threonine kinase 17b (STK17B), mRNA.	NM_004226.2	6.9	7.7	0.8	5.58
ILMN_1780132	PELI2	pellino homolog 2 (Drosophila) (PELI2), mRNA.	NM_021255.2	7.65	6.6	-1.05	5.56
ILMN_2370208	CMTM3	CKLF-like MARVEL transmembrane domain containing 3 (CMTM3), transcript variant 5, mRNA.	NM_001048251.1	6.62	7.42	0.8	5.56
ILMN_1668345	OAF	OAF homolog (Drosophila) (OAF), mRNA.	NM_178507.2	9.4	8.68	-0.72	5.55
ILMN_1814686	BCMO1	beta-carotene 15,15'-monooxygenase 1 (BCMO1), mRNA.	NM_017429.2	6.43	5.82	-0.61	5.55
ILMN_1735038	39875	membrane-associated ring finger (C3HC4) 3 (MARCH3), mRNA.	NM_178450.2	6.14	6.92	0.78	5.54
ILMN_1713803	LOC400566	hypothetical gene supported by AK128660 (LOC400566), mRNA.	NM_001013672.3	8.93	9.59	0.66	5.53
ILMN_1675448	ZFP36L1	zinc finger protein 36, C3H type-like 1 (ZFP36L1), mRNA.	NM_004926.2	10.96	11.62	0.66	5.52
ILMN_1685699	PRSS3	protease, serine, 3 (mesotrypsin) (PRSS3), mRNA.	NM_002771.2	9.2	9.78	0.58	5.51
ILMN_1740571	LOC647859	PREDICTED: similar to Occludin (LOC647859), mRNA.	XM_001130815.1	9.06	8.3	-0.76	5.48
ILMN_2400648	SRGAP3	SLIT-ROBO Rho GTPase activating protein 3 (SRGAP3), transcript variant 2, mRNA.	NM_001033117.1	6.74	6	-0.74	5.46
ILMN_1695687	SALL4	sal-like 4 (Drosophila) (SALL4), mRNA.	NM_020436.2	7.53	8.28	0.75	5.46
ILMN_1702899	PLEKHA7	pleckstrin homology domain containing, family A member 7 (PLEKHA7), mRNA.	NM_175058.3	8	7.39	-0.61	5.43
ILMN_1651347	SERTAD2	SERTA domain containing 2 (SERTAD2), mRNA.	NM_014755.1	10.95	10.4	-0.55	5.39
ILMN_1775501	IL1B	interleukin 1, beta (IL1B), mRNA.	NM_000576.2	7.31	6.57	-0.74	5.39
ILMN_2136089	MTE	metallothionein E (MTE), mRNA.	NM_175621.2	11.22	10.64	-0.59	5.38
ILMN_2298301	BNC1	basonuclin 1 (BNC1), mRNA.	NM_001717.2	8.65	9.48	0.83	5.36
ILMN_1811264	CCDC32	coiled-coil domain containing 32 (CCDC32), transcript variant 2, mRNA.	NM_052849.2	10.82	11.41	0.59	5.36
ILMN_1788377	COL27A1	collagen, type XXVII, alpha 1 (COL27A1), mRNA.	NM_032888.2	6.19	7.05	0.86	5.36
ILMN_1679837	SGPP1	sphingosine-1-phosphate phosphatase 1 (SGPP1), mRNA.	NM_030791.2	7.86	6.98	-0.87	5.35
ILMN_2071826	RNF152	ring finger protein 152 (RNF152), mRNA.	NM_173557.2	7.32	8.04	0.72	5.35
ILMN_1702501	RPS6KA2	ribosomal protein S6 kinase, 90kDa, polypeptide 2 (RPS6KA2), transcript variant 2, mRNA.	NM_001006932.1	8.58	9.16	0.58	5.34
ILMN_1910948		mRNA; cDNA DKFZp686J1595 (from clone DKFZp686J1595)		7.04	7.97	0.92	5.33
ILMN_1722156	RWDD2A	RWD domain containing 2A (RWDD2A), mRNA.	NM_033411.2	8.17	8.83	0.66	5.33
ILMN_2364022	SLC16A3	solute carrier family 16, member 3 (monocarboxylic acid transporter 4) (SLC16A3), transcript variant 2, mRNA.	NM_004207.2	8.52	9.26	0.73	5.32
ILMN_1813386	CORO6	coronin 6 (CORO6), mRNA.	NM_032854.2	7.53	8.37	0.84	5.29
ILMN_1792076	TRERF1	transcriptional regulating factor 1 (TRERF1), mRNA.	NM_033502.1	9.07	8.25	-0.82	5.26
ILMN_1665832	ID1	inhibitor of DNA binding 1, dominant negative helix-loop-helix protein (ID1), transcript variant 2, mRNA.	NM_181353.1	7.67	6.69	-0.98	5.25
ILMN_1656826	SH3RF1	SH3 domain containing ring finger 1 (SH3RF1), mRNA.	NM_020870.3	8.03	9.05	1.01	5.25
ILMN_1776602	RNASE4	ribonuclease, RNase A family, 4 (RNASE4), transcript variant 3, mRNA.	NM_194431.1	7.85	7.16	-0.69	5.23
ILMN_1658798	MEGF9	multiple EGF-like-domains 9 (MEGF9), mRNA.	NM_001080497.1	6.67	7.48	0.8	5.23
ILMN_1799320	C9orf37	chromosome 9 open reading frame 37 (C9orf37), mRNA.	NM_032937.3	7.52	8.23	0.71	5.22
ILMN_2043452	FANCE	Fanconi anemia, complementation group E (FANCE), mRNA.	NM_021922.2	9.16	8.55	-0.61	5.2
ILMN_1684653	GPR115	G protein-coupled receptor 115 (GPR115), mRNA.	NM_153838.3	5.93	6.94	1.01	5.2
ILMN_1686562	KIF13B	kinesin family member 13B (KIF13B), mRNA.	NM_015254.2	7.45	8.02	0.56	5.2
ILMN_1792978	HAS2	hyaluronan synthase 2 (HAS2), mRNA.	NM_005328.1	6.65	7.4	0.75	5.18
ILMN_2044453	LPAR5	lysophosphatidic acid receptor 5 (LPAR5), mRNA.	NM_020400.4	10.05	10.63	0.59	5.18
ILMN_2396444	CD14	CD14 molecule (CD14), transcript variant 2, mRNA.	NM_001040021.1	8.08	7.34	-0.74	5.17
ILMN_2239774	FAM83A	family with sequence similarity 83, member A (FAM83A), transcript variant 1, mRNA.	NM_032899.4	8.06	8.99	0.93	5.17
ILMN_1718766	MT1F	metallothionein 1F (MT1F), mRNA.	NM_005949.2	11.74	11.19	-0.55	5.16
ILMN_1730294	C18orf37	chromosome 18 open reading frame 37 (C18orf37), transcript variant 2, mRNA.	NM_194281.3	9.32	9.96	0.64	5.16
ILMN_1706344	ABHD6	abhydrolase domain containing 6 (ABHD6), mRNA.	NM_020676.4	7.98	7.27	-0.71	5.15
ILMN_2094952	NUAK2	NUAK family, SNF1-like kinase, 2 (NUAK2), mRNA.	NM_030952.1	7.25	7.91	0.66	5.14
ILMN_1870041		partial mRNA; ID YG39-1C		6.73	7.56	0.82	5.13
ILMN_1719792	PHLDB2	pleckstrin homology-like domain, family B, member 2 (PHLDB2), mRNA.	NM_145753.1	7.97	8.94	0.97	5.13
ILMN_1753413	TRIOBP	TRIO and F-actin binding protein (TRIOBP), transcript variant 2, mRNA.	NM_138632.2	7.89	8.67	0.77	5.13
ILMN_1679267	TGM2	transglutaminase 2 (C polypeptide, protein-glutamine-gamma-glutamyltransferase) (TGM2), transcript variant 2, mRNA.	NM_198951.1	5.77	6.51	0.74	5.13
ILMN_1823809		cDNA: FLJ21429 fis, clone COL04205		8.67	9.48	0.8	5.13
ILMN_1760727	ANG	angiogenin, ribonuclease, RNase A family, 5 (ANG), transcript variant 2, mRNA.	NM_001097577.1	9.05	8.41	-0.65	5.12
ILMN_1741032	HERC3	hect domain and RLD 3 (HERC3), mRNA.	NM_014606.1	6.39	7.3	0.91	5.08
ILMN_2387090	CGGBP1	CGG triplet repeat binding protein 1 (CGGBP1), transcript variant 2, mRNA.	NM_003663.3	9.96	10.51	0.55	5.07
ILMN_1697561	FBXL16	F-box and leucine-rich repeat protein 16 (FBXL16), mRNA.	NM_153350.2	7.93	7.15	-0.78	5.05
ILMN_1900110		BX099724 Soares_fetal_liver_spleen_1NFLS_S1 cDNA clone IMAGp998F201004, mRNA sequence		6.43	7.18	0.76	5.05
ILMN_2367469	CARS	cysteinyl-tRNA synthetase (CARS), transcript variant 4, mRNA.	NM_001014438.1	10.94	11.66	0.72	5.05
ILMN_2382290	KREMEN2	kringle containing transmembrane protein 2 (KREMEN2), transcript variant 2, mRNA.	NM_024507.2	8.06	7.39	-0.68	5.04
ILMN_1773959	ST6GALNAC5	ST6 (alpha-N-acetyl-neuraminyl-2,3-beta-galactosyl-1, 3)-N-acetylgalactosaminide alpha-2,6-sialyltransferase 5 (ST6GALNAC5), mRNA.	NM_030965.1	7.4	8.2	0.8	5.03
ILMN_1749875	LOC728715	PREDICTED: similar to hCG38149 (LOC728715), mRNA.	XM_001128260.1	9.53	8.76	-0.77	5.02
ILMN_2087692	CYBRD1	cytochrome b reductase 1 (CYBRD1), mRNA.	NM_024843.2	8.76	7.93	-0.83	5.01
ILMN_2283597	FAM134B	family with sequence similarity 134, member B (FAM134B), transcript variant 1, mRNA.	NM_001034850.1	7.02	6.17	-0.84	5
ILMN_2383611	PTPRE	protein tyrosine phosphatase, receptor type, E (PTPRE), transcript variant 2, mRNA.	NM_130435.2	8.86	8.24	-0.63	5
ILMN_2109708	ECGF1	endothelial cell growth factor 1 (platelet-derived) (ECGF1), mRNA.	NM_001953.2	10.26	10.83	0.57	5
ILMN_1738546	LOC400578	PREDICTED: similar to Keratin, type I cytoskeletal 14 (Cytokeratin-14) (CK-14) (Keratin-14) (K14) (LOC400578), mRNA.	XR_017543.1	7.14	8.03	0.88	5
ILMN_1737184	CDCA7	cell division cycle associated 7 (CDCA7), transcript variant 1, mRNA.	NM_031942.4	11.47	10.76	-0.71	4.99
ILMN_1723678	PRPH	peripherin (PRPH), mRNA.	NM_006262.3	7.2	6.55	-0.65	4.97
ILMN_2053415	LDLR	low density lipoprotein receptor (familial hypercholesterolemia) (LDLR), mRNA.	NM_000527.2	11.72	11.06	-0.66	4.94
ILMN_1723522	APOLD1	apolipoprotein L domain containing 1 (APOLD1), mRNA.	NM_030817.1	7.52	6.72	-0.8	4.93
ILMN_1656285	METTL7A	methyltransferase like 7A (METTL7A), mRNA.	NM_014033.3	7.56	6.66	-0.9	4.92
ILMN_1776181	BIRC3	baculoviral IAP repeat-containing 3 (BIRC3), transcript variant 1, mRNA.	NM_001165.3	7.17	6.41	-0.76	4.92
ILMN_1763265	CHMP1B	chromatin modifying protein 1B (CHMP1B), mRNA.	NM_020412.3	10.04	10.57	0.53	4.91
ILMN_1773963	GNA15	guanine nucleotide binding protein (G protein), alpha 15 (Gq class) (GNA15), mRNA.	NM_002068.1	10.63	11.21	0.58	4.91
ILMN_1776724	LYPD6	LY6/PLAUR domain containing 6 (LYPD6), mRNA.	NM_194317.2	7.51	6.85	-0.66	4.9
ILMN_1743232	MICALCL	MICAL C-terminal like (MICALCL), mRNA.	NM_032867.2	7.38	8.17	0.79	4.87
ILMN_1739582	HOXA9	homeobox A9 (HOXA9), mRNA.	NM_152739.3	11.77	11.24	-0.53	4.81
ILMN_1702858	ADHFE1	alcohol dehydrogenase, iron containing, 1 (ADHFE1), mRNA.	NM_144650.2	7.56	6.97	-0.59	4.81
ILMN_1692295	MYO1G	myosin IG (MYO1G), mRNA.	NM_033054.1	5.93	6.58	0.65	4.8
ILMN_2324421	TXNRD1	thioredoxin reductase 1 (TXNRD1), transcript variant 4, mRNA.	NM_182743.1	10.09	9.2	-0.89	4.79
ILMN_1715991	SDPR	serum deprivation response (phosphatidylserine binding protein) (SDPR), mRNA.	NM_004657.4	7.17	6.54	-0.63	4.79
ILMN_1710937	IFI16	interferon, gamma-inducible protein 16 (IFI16), mRNA.	NM_005531.1	11.21	10.59	-0.62	4.78
ILMN_1753370	ABTB2	ankyrin repeat and BTB (POZ) domain containing 2 (ABTB2), mRNA.	NM_145804.1	6.56	7.4	0.84	4.78
ILMN_1758719	NEDD9	neural precursor cell expressed, developmentally down-regulated 9 (NEDD9), transcript variant 1, mRNA.	NM_006403.2	6.96	7.74	0.78	4.77
ILMN_1756953	GBP6	guanylate binding protein family, member 6 (GBP6), mRNA.	NM_198460.1	9.02	8.29	-0.73	4.76
ILMN_1794017	SERTAD1	SERTA domain containing 1 (SERTAD1), mRNA.	NM_013376.3	9.34	9.87	0.53	4.75
ILMN_1752755	VWF	von Willebrand factor (VWF), mRNA.	NM_000552.3	6.83	6.11	-0.72	4.74
ILMN_1782141	GRHL3	grainyhead-like 3 (Drosophila) (GRHL3), transcript variant 1, mRNA.	NM_021180.2	7.6	6.8	-0.8	4.74
ILMN_1685122	COL9A2	collagen, type IX, alpha 2 (COL9A2), mRNA.	NM_001852.3	6.1	6.74	0.65	4.73
ILMN_2397750	IVNS1ABP	influenza virus NS1A binding protein (IVNS1ABP), mRNA.	NM_006469.4	9.19	10.36	1.18	4.73
ILMN_1743933	TSHZ3	teashirt zinc finger homeobox 3 (TSHZ3), mRNA.	NM_020856.2	6.26	7.08	0.82	4.69
ILMN_1823850		RST21348 Athersys RAGE Library cDNA, mRNA sequence		6.59	7.67	1.08	4.68
ILMN_1759175	DUSP10	dual specificity phosphatase 10 (DUSP10), transcript variant 1, mRNA.	NM_007207.3	7.81	7.23	-0.58	4.66
ILMN_1656422	GPR87	G protein-coupled receptor 87 (GPR87), mRNA.	NM_023915.2	8.49	9.33	0.83	4.64
ILMN_1806607	SFN	stratifin (SFN), mRNA.	NM_006142.3	12	12.56	0.56	4.61
ILMN_1700935	HAS2	hyaluronan synthase 2 (HAS2), mRNA.	NM_005328.1	6.09	6.67	0.58	4.61
ILMN_1729095	PDZD2	PDZ domain containing 2 (PDZD2), mRNA.	NM_178140.2	7.95	7.2	-0.75	4.6
ILMN_1813374	C19orf28	chromosome 19 open reading frame 28 (C19orf28), transcript variant 3, mRNA.	NM_174983.3	6.68	7.44	0.76	4.6
ILMN_1684183	RAD9A	RAD9 homolog A (S. pombe) (RAD9A), mRNA.	NM_004584.2	8.83	8.15	-0.68	4.59
ILMN_1854132		BX098874 Soares_NhHMPu_S1 cDNA clone IMAGp998D154543, mRNA sequence		8.56	7.81	-0.75	4.59
ILMN_2228938	ECM2	extracellular matrix protein 2, female organ and adipocyte specific (ECM2), mRNA.	NM_001393.2	8.86	8.27	-0.59	4.58
ILMN_1657870	ABL2	v-abl Abelson murine leukemia viral oncogene homolog 2 (arg, Abelson-related gene) (ABL2), transcript variant a, mRNA.	NM_005158.3	6.36	7.25	0.89	4.58
ILMN_2257607	STARD13	START domain containing 13 (STARD13), transcript variant alpha, mRNA.	NM_178006.1	8.2	9.05	0.84	4.58
ILMN_2097997	IFNE1	interferon epsilon 1 (IFNE1), mRNA.	NM_176891.3	6.44	7.25	0.81	4.57
ILMN_1661628	LOC653110	PREDICTED: similar to annexin A8, transcript variant 1 (LOC653110), mRNA.	XM_926584.1	12.32	13.1	0.78	4.57
ILMN_1683470	TMEM139	transmembrane protein 139 (TMEM139), mRNA.	NM_153345.1	7.64	7.03	-0.61	4.56
ILMN_1900520		602659965F1 NCI_CGAP_Skn3 cDNA clone IMAGE:4802969 5, mRNA sequence		9.96	10.56	0.6	4.55
ILMN_1707312	NFIL3	nuclear factor, interleukin 3 regulated (NFIL3), mRNA.	NM_005384.2	7.2	8.12	0.91	4.52
ILMN_2340919	GRB10	growth factor receptor-bound protein 10 (GRB10), transcript variant 1, mRNA.	NM_005311.3	5.87	6.51	0.64	4.47
ILMN_1705384	PPFIBP1	PTPRF interacting protein, binding protein 1 (liprin beta 1) (PPFIBP1), transcript variant 2, mRNA.	NM_177444.1	8.03	8.69	0.66	4.47
ILMN_1701789	IFIT3	interferon-induced protein with tetratricopeptide repeats 3 (IFIT3), mRNA.	NM_001031683.1	8.69	7.67	-1.03	4.46
ILMN_1658494	C13orf15	chromosome 13 open reading frame 15 (C13orf15), mRNA.	NM_014059.2	8.8	8.24	-0.56	4.45
ILMN_2339835	PTGS1	prostaglandin-endoperoxide synthase 1 (prostaglandin G/H synthase and cyclooxygenase) (PTGS1), transcript variant 2, mRNA.	NM_080591.1	8.57	7.92	-0.65	4.44
ILMN_1741200	RFX5	regulatory factor X, 5 (influences HLA class II expression) (RFX5), transcript variant 2, mRNA.	NM_001025603.1	10.74	10.06	-0.67	4.44
ILMN_1779234	CXCL6	chemokine (C-X-C motif) ligand 6 (granulocyte chemotactic protein 2) (CXCL6), mRNA.	NM_002993.2	7.81	8.44	0.63	4.44
ILMN_1713934	LITAF	lipopolysaccharide-induced TNF factor (LITAF), mRNA.	NM_004862.2	12.01	12.59	0.58	4.44
ILMN_2390310	C17orf91	chromosome 17 open reading frame 91 (C17orf91), transcript variant 2, mRNA.	NM_001001870.1	9.82	10.42	0.61	4.43
ILMN_1731224	PARP9	poly (ADP-ribose) polymerase family, member 9 (PARP9), mRNA.	NM_031458.1	9.12	8.25	-0.87	4.41
ILMN_2093343	PLAC8	placenta-specific 8 (PLAC8), mRNA.	NM_016619.1	8.01	7.41	-0.6	4.4
ILMN_2068104	TFPI2	tissue factor pathway inhibitor 2 (TFPI2), mRNA.	NM_006528.2	6.75	7.4	0.66	4.4
ILMN_1751465	BNC1	basonuclin 1 (BNC1), mRNA.	NM_001717.2	8.76	9.5	0.74	4.37
ILMN_1761762	C6orf141	chromosome 6 open reading frame 141 (C6orf141), mRNA.	NM_153344.1	8.88	9.74	0.86	4.37
ILMN_1670111	CDKN2B	cyclin-dependent kinase inhibitor 2B (p15, inhibits CDK4) (CDKN2B), transcript variant 2, mRNA.	NM_078487.2	5.89	6.71	0.82	4.37
ILMN_1756992	MUC1	mucin 1, cell surface associated (MUC1), transcript variant 6, mRNA.	NM_001044391.1	9.41	8.86	-0.56	4.34
ILMN_1773742	DNAJB9	DnaJ (Hsp40) homolog, subfamily B, member 9 (DNAJB9), mRNA.	NM_012328.1	8.22	8.79	0.57	4.32
ILMN_1859787		BX105743 NCI_CGAP_GC6 cDNA clone IMAGp998H135716, mRNA sequence		7.82	8.35	0.53	4.32
ILMN_1815745	SOX4	SRY (sex determining region Y)-box 4 (SOX4), mRNA.	NM_003107.2	7.36	8.21	0.84	4.31
ILMN_1698404	ERN1	endoplasmic reticulum to nucleus signalling 1 (ERN1), transcript variant 2, mRNA.	NM_152461.2	7.11	7.72	0.62	4.3
ILMN_2186983	ANXA8L2	annexin A8-like 2 (ANXA8L2), mRNA.	NM_001630.2	12.68	13.33	0.65	4.29
ILMN_1806502	ZNF165	zinc finger protein 165 (ZNF165), mRNA.	NM_003447.2	9.3	8.73	-0.57	4.28
ILMN_1668194	LMTK3	PREDICTED: lemur tyrosine kinase 3 (LMTK3), mRNA.	XM_936372.2	8.6	7.92	-0.67	4.28
ILMN_1703284	SPIRE2	spire homolog 2 (Drosophila) (SPIRE2), mRNA.	NM_032451.1	8.52	7.95	-0.56	4.26
ILMN_1904628		PM0-ST0264-161199-001-b06 ST0264 cDNA, mRNA sequence		7.5	6.8	-0.7	4.26
ILMN_1687768	NCOA7	nuclear receptor coactivator 7 (NCOA7), mRNA.	NM_181782.2	11.7	11.11	-0.59	4.26
ILMN_1792538	CD7	CD7 molecule (CD7), mRNA.	NM_006137.6	6.52	5.98	-0.54	4.26
ILMN_1654370	TESK2	testis-specific kinase 2 (TESK2), mRNA.	NM_007170.2	7.94	7.31	-0.63	4.25
ILMN_2360415	PRNP	prion protein (p27-30) (Creutzfeldt-Jakob disease, Gerstmann-Strausler-Scheinker syndrome, fatal familial insomnia) (PRNP), transcript variant 2, mRNA.	NM_183079.2	12.82	13.38	0.57	4.24
ILMN_1732404	C2orf15	chromosome 2 open reading frame 15 (C2orf15), mRNA.	NM_144706.2	8.93	8.3	-0.63	4.23
ILMN_1887357		cDNA FLJ38396 fis, clone FEBRA2007957		8.94	8.32	-0.62	4.22
ILMN_1693242	ZNF342	zinc finger protein 342 (ZNF342), mRNA.	NM_145288.1	9.19	8.6	-0.59	4.22
ILMN_1740903	C7orf49	chromosome 7 open reading frame 49 (C7orf49), mRNA.	NM_024033.1	8.55	9.22	0.67	4.22
ILMN_2329927	ABCG1	ATP-binding cassette, sub-family G (WHITE), member 1 (ABCG1), transcript variant 2, mRNA.	NM_016818.2	6.45	7.06	0.61	4.19
ILMN_1791580	FXYD3	FXYD domain containing ion transport regulator 3 (FXYD3), transcript variant 1, mRNA.	NM_005971.2	9.48	8.91	-0.57	4.17
ILMN_1731064	CABC1	chaperone, ABC1 activity of bc1 complex homolog (S. pombe) (CABC1), nuclear gene encoding mitochondrial protein, mRNA.	NM_020247.4	9.1	8.53	-0.57	4.17
ILMN_1692177	TSC22D1	TSC22 domain family, member 1 (TSC22D1), transcript variant 2, mRNA.	NM_006022.2	10.35	10.92	0.57	4.17
ILMN_1728662	ALDH3B1	aldehyde dehydrogenase 3 family, member B1 (ALDH3B1), transcript variant 1, mRNA.	NM_000694.2	7.68	7.06	-0.63	4.16
ILMN_1826921		mRNA; cDNA DKFZp686B15184 (from clone DKFZp686B15184)		8.47	8.98	0.52	4.15
ILMN_1696974	ANG	angiogenin, ribonuclease, RNase A family, 5 (ANG), transcript variant 2, mRNA.	NM_001097577.1	7.71	6.96	-0.75	4.12
ILMN_1689200	DHDH	dihydrodiol dehydrogenase (dimeric) (DHDH), mRNA.	NM_014475.3	7.44	6.77	-0.67	4.1
ILMN_1686988	ST5	suppression of tumorigenicity 5 (ST5), transcript variant 3, mRNA.	NM_213618.1	7.27	7.95	0.68	4.08
ILMN_2384122	GPR56	G protein-coupled receptor 56 (GPR56), transcript variant 3, mRNA.	NM_201525.1	12.53	13.14	0.6	4.07
ILMN_2173919	MYO9A	myosin IXA (MYO9A), mRNA.	NM_006901.1	9.31	8.74	-0.58	4.05
ILMN_1660199	ACAA2	acetyl-Coenzyme A acyltransferase 2 (mitochondrial 3-oxoacyl-Coenzyme A thiolase) (ACAA2), nuclear gene encoding mitochondrial protein, mRNA.	NM_006111.1	6.37	7.1	0.73	4.04
ILMN_1746763	ECM2	extracellular matrix protein 2, female organ and adipocyte specific (ECM2), mRNA.	NM_001393.2	7.43	6.84	-0.59	4.02
ILMN_1801307	TNFSF10	tumor necrosis factor (ligand) superfamily, member 10 (TNFSF10), mRNA.	NM_003810.2	10.63	9.79	-0.84	4.02
ILMN_2043918	DLEU1	deleted in lymphocytic leukemia, 1 (DLEU1) on chromosome 13.	NR_002605.1	9.92	9.26	-0.66	4.01
ILMN_1658575	GALNT5	UDP-N-acetyl-alpha-D-galactosamine:polypeptide N-acetylgalactosaminyltransferase 5 (GalNAc-T5) (GALNT5), mRNA.	NM_014568.1	8.55	7.92	-0.63	4.01
ILMN_2287157	DST	dystonin (DST), transcript variant 1, mRNA.	NM_183380.1	7.24	8.01	0.77	4.01
ILMN_1745570	KLK7	kallikrein-related peptidase 7 (KLK7), transcript variant 1, mRNA.	NM_005046.2	10.59	10.02	-0.57	3.99
ILMN_1666376	TRIM56	tripartite motif-containing 56 (TRIM56), mRNA.	NM_030961.1	8.87	9.68	0.8	3.98
ILMN_1732468	HSPA4L	heat shock 70kDa protein 4-like (HSPA4L), mRNA.	NM_014278.2	7.8	7.12	-0.68	3.97
ILMN_1803811	TRIB1	tribbles homolog 1 (Drosophila) (TRIB1), mRNA.	NM_025195.2	10.05	10.67	0.62	3.97
ILMN_2342579	IL7R	interleukin 7 receptor (IL7R), mRNA.	NM_002185.2	6.87	7.52	0.66	3.97
ILMN_1684497	C10orf33	chromosome 10 open reading frame 33 (C10orf33), mRNA.	NM_032709.1	7.39	6.69	-0.7	3.95
ILMN_1752455	DOCK5	dedicator of cytokinesis 5 (DOCK5), mRNA.	NM_024940.6	8.68	9.44	0.76	3.95
ILMN_1718990	NFRKB	nuclear factor related to kappaB binding protein (NFRKB), mRNA.	NM_006165.2	7.65	7.07	-0.58	3.94
ILMN_1659122	KLF10	Kruppel-like factor 10 (KLF10), transcript variant 1, mRNA.	NM_005655.1	6.68	7.4	0.72	3.92
ILMN_1662640	C20orf127	chromosome 20 open reading frame 127 (C20orf127), mRNA.	NM_080757.1	11.1	10.51	-0.59	3.91
ILMN_1811593	NPAL1	NIPA-like domain containing 1 (NPAL1), mRNA.	NM_207330.1	8.22	9	0.78	3.9
ILMN_2374115	TFAP2A	transcription factor AP-2 alpha (activating enhancer binding protein 2 alpha) (TFAP2A), transcript variant 2, mRNA.	NM_001032280.2	9.53	8.97	-0.55	3.89
ILMN_1751346	ERBB3	v-erb-b2 erythroblastic leukemia viral oncogene homolog 3 (avian) (ERBB3), transcript variant 1, mRNA.	NM_001982.2	9.38	8.41	-0.98	3.88
ILMN_1718968	MT1E	metallothionein 1E (functional) (MT1E), mRNA.	NM_175617.2	7.27	6.73	-0.55	3.88
ILMN_1703926	PTGER2	prostaglandin E receptor 2 (subtype EP2), 53kDa (PTGER2), mRNA.	NM_000956.2	8.22	8.79	0.58	3.88
ILMN_1674650	C9orf95	chromosome 9 open reading frame 95 (C9orf95), mRNA.	NM_017881.1	9.39	8.55	-0.84	3.87
ILMN_1685441	DDEFL1	development and differentiation enhancing factor-like 1 (DDEFL1), mRNA.	NM_017707.2	9.02	8.31	-0.72	3.87
ILMN_2262444	PDE7A	phosphodiesterase 7A (PDE7A), transcript variant 2, mRNA.	NM_002604.1	9.23	9.86	0.63	3.86
ILMN_1686573	DEFB1	defensin, beta 1 (DEFB1), mRNA.	NM_005218.3	7.63	6.72	-0.92	3.83
ILMN_1797009	F3	coagulation factor III (thromboplastin, tissue factor) (F3), mRNA.	NM_001993.2	8.33	9.03	0.7	3.8
ILMN_2401873	DUSP10	dual specificity phosphatase 10 (DUSP10), transcript variant 3, mRNA.	NM_144729.1	9.56	8.83	-0.73	3.79
ILMN_2352921	BPGM	2,3-bisphosphoglycerate mutase (BPGM), transcript variant 1, mRNA.	NM_001724.3	7.21	7.86	0.65	3.79
ILMN_1812968	SOX18	SRY (sex determining region Y)-box 18 (SOX18), mRNA.	NM_018419.2	6.78	7.7	0.92	3.78
ILMN_1726448	MMP1	matrix metallopeptidase 1 (interstitial collagenase) (MMP1), mRNA.	NM_002421.2	7.12	7.94	0.82	3.78
ILMN_2175112	KCNS3	potassium voltage-gated channel, delayed-rectifier, subfamily S, member 3 (KCNS3), mRNA.	NM_002252.3	7.65	7.11	-0.54	3.76
ILMN_2402416	DNAJB6	DnaJ (Hsp40) homolog, subfamily B, member 6 (DNAJB6), transcript variant 2, mRNA.	NM_005494.2	10.64	11.16	0.52	3.76
ILMN_2411897	KLF10	Kruppel-like factor 10 (KLF10), transcript variant 1, mRNA.	NM_005655.1	6.39	7.02	0.62	3.76
ILMN_1671005	IRF2BP2	interferon regulatory factor 2 binding protein 2 (IRF2BP2), transcript variant 1, mRNA.	NM_182972.2	8.15	8.77	0.62	3.75
ILMN_1867664	SPTLC3	serine palmitoyltransferase, long chain base subunit 3 (SPTLC3), mRNA.	NM_018327.2	8.27	7.53	-0.75	3.74
ILMN_1893697		nj54b12.s1 NCI_CGAP_Pr9 cDNA clone IMAGE:996287, mRNA sequence		7.19	6.53	-0.66	3.74
ILMN_2188264	CYR61	cysteine-rich, angiogenic inducer, 61 (CYR61), mRNA.	NM_001554.3	8.32	9.62	1.3	3.73
ILMN_2077905	PTGFRN	prostaglandin F2 receptor negative regulator (PTGFRN), mRNA.	NM_020440.2	7.64	8.51	0.87	3.72
ILMN_1715189	LHX6	LIM homeobox 6 (LHX6), transcript variant 2, mRNA.	NM_199160.2	6.37	5.75	-0.61	3.71
ILMN_1751561	CAMK1D	calcium/calmodulin-dependent protein kinase ID (CAMK1D), transcript variant 2, mRNA.	NM_153498.2	6.18	6.77	0.6	3.71
ILMN_1695719	EIF2C2	eukaryotic translation initiation factor 2C, 2 (EIF2C2), mRNA.	NM_012154.2	9.7	10.41	0.72	3.71
ILMN_1718671	GJB6	gap junction protein, beta 6 (GJB6), mRNA.	NM_006783.2	6.07	6.62	0.55	3.71
ILMN_1747556	CDK9	cyclin-dependent kinase 9 (CDC2-related kinase) (CDK9), mRNA.	NM_001261.2	9.17	9.77	0.6	3.7
ILMN_1794643	ZGPAT	zinc finger, CCCH-type with G patch domain (ZGPAT), transcript variant 1, mRNA.	NM_032527.3	10.02	10.55	0.53	3.69
ILMN_1708006	MICB	MHC class I polypeptide-related sequence B (MICB), mRNA.	NM_005931.2	8.91	8.37	-0.54	3.68
ILMN_1789793	NUAK2	NUAK family, SNF1-like kinase, 2 (NUAK2), mRNA.	NM_030952.1	6.87	7.54	0.68	3.68
ILMN_1658483	IL1A	interleukin 1, alpha (IL1A), mRNA.	NM_000575.3	7.18	7.84	0.66	3.68
ILMN_1695290	FERMT2	fermitin family homolog 2 (Drosophila) (FERMT2), mRNA.	NM_006832.1	8.83	9.38	0.56	3.65
ILMN_1685496	RGS7	regulator of G-protein signalling 7 (RGS7), mRNA.	NM_002924.3	8.05	8.9	0.85	3.65
ILMN_1651767	MKL1	megakaryoblastic leukemia (translocation) 1 (MKL1), mRNA.	NM_020831.3	7.39	8.13	0.74	3.65
ILMN_2151281	GABARAPL1	GABA(A) receptor-associated protein like 1 (GABARAPL1), mRNA.	NM_031412.2	9.49	10.2	0.71	3.63
ILMN_1684211	SEC14L2	SEC14-like 2 (S. cerevisiae) (SEC14L2), mRNA.	NM_012429.1	7.14	7.9	0.77	3.62
ILMN_1748844	CNKSR3	CNKSR family member 3 (CNKSR3), mRNA.	NM_173515.2	8.29	7.66	-0.63	3.58
ILMN_1660451	STARD13	START domain containing 13 (STARD13), transcript variant delta, mRNA.	NM_178008.1	8.94	9.47	0.53	3.58
ILMN_1846771		AGENCOURT_10167693 NIH_MGC_71 cDNA clone IMAGE:6527009 5, mRNA sequence		8.05	7.38	-0.67	3.57
ILMN_1727200	SLCO4A1	solute carrier organic anion transporter family, member 4A1 (SLCO4A1), mRNA.	NM_016354.3	7.38	6.72	-0.66	3.57
ILMN_1721922	NAB2	NGFI-A binding protein 2 (EGR1 binding protein 2) (NAB2), mRNA.	NM_005967.2	7.76	7.06	-0.7	3.57
ILMN_1680987	HAND1	heart and neural crest derivatives expressed 1 (HAND1), mRNA.	NM_004821.1	6.18	6.77	0.6	3.57
ILMN_1703891	TBC1D9	TBC1 domain family, member 9 (with GRAM domain) (TBC1D9), mRNA.	NM_015130.2	7.98	7.4	-0.58	3.55
ILMN_1760490	ACVR1	activin A receptor, type I (ACVR1), mRNA.	NM_001105.2	10.02	10.55	0.54	3.55
ILMN_1687721	PROC	protein C (inactivator of coagulation factors Va and VIIIa) (PROC), mRNA.	NM_000312.1	7.76	8.33	0.57	3.55
ILMN_1687538	ETS1	v-ets erythroblastosis virus E26 oncogene homolog 1 (avian) (ETS1), mRNA.	NM_005238.2	10.45	11.31	0.87	3.55
ILMN_1670539	LOC92017	similar to RIKEN cDNA 4933437K13 (LOC92017), mRNA.	NM_001009607.1	7.31	7.85	0.55	3.55
ILMN_2211728	GUCA1B	guanylate cyclase activator 1B (retina) (GUCA1B), mRNA.	NM_002098.3	7.12	6.42	-0.7	3.54
ILMN_1780255	KLK6	kallikrein-related peptidase 6 (KLK6), transcript variant B, mRNA.	NM_001012964.1	9.27	9.8	0.52	3.53
ILMN_2407389	GPNMB	glycoprotein (transmembrane) nmb (GPNMB), transcript variant 2, mRNA.	NM_002510.2	9.49	8.93	-0.57	3.51
ILMN_1910180		cDNA: FLJ21027 fis, clone CAE07110		6.65	7.33	0.68	3.51
ILMN_1741346	EPHB3	EPH receptor B3 (EPHB3), mRNA.	NM_004443.3	8.07	7.47	-0.59	3.5
ILMN_1683998	CREG2	cellular repressor of E1A-stimulated genes 2 (CREG2), mRNA.	NM_153836.2	7.09	8	0.91	3.49
ILMN_2336094	ODZ3	odz, odd Oz/ten-m homolog 3 (Drosophila) (ODZ3), mRNA.	NM_001080477.1	9.68	10.33	0.65	3.49
ILMN_1791593	MGC24039	hypothetical protein MGC24039 (MGC24039), mRNA.	NM_144973.3	6.73	6.17	-0.56	3.46
ILMN_2046470	DAAM1	dishevelled associated activator of morphogenesis 1 (DAAM1), mRNA.	NM_014992.1	10.67	11.43	0.76	3.46
ILMN_1835631		AV645572 GLC cDNA clone GLCABG03 3, mRNA sequence		7.34	8.15	0.81	3.46
ILMN_2398408	TCEAL1	transcription elongation factor A (SII)-like 1 (TCEAL1), transcript variant 2, mRNA.	NM_001006639.1	8.95	9.53	0.58	3.46
ILMN_1740415	WFDC3	WAP four-disulfide core domain 3 (WFDC3), mRNA.	NM_080614.1	7.18	6.36	-0.82	3.45
ILMN_1689876	LOC648189	PREDICTED: similar to TBC1 domain family, member 2B (LOC648189), mRNA.	XM_937239.2	6.99	7.63	0.64	3.45
ILMN_1900998		cDNA clone IMAGE:5299888		8.88	7.98	-0.9	3.43
ILMN_1754130	TRIM52	tripartite motif-containing 52 (TRIM52), mRNA.	NM_032765.2	8.12	8.78	0.66	3.43
ILMN_1813763	SLC20A2	solute carrier family 20 (phosphate transporter), member 2 (SLC20A2), mRNA.	NM_006749.3	9.24	8.57	-0.67	3.41
ILMN_1814333	SERPINI1	serpin peptidase inhibitor, clade I (neuroserpin), member 1 (SERPINI1), mRNA.	NM_005025.3	6.81	6.24	-0.57	3.41
ILMN_1717636	RGMA	RGM domain family, member A (RGMA), mRNA.	NM_020211.1	8.09	7.43	-0.65	3.41
ILMN_1708798	EAF2	ELL associated factor 2 (EAF2), mRNA.	NM_018456.4	7.73	8.41	0.68	3.41
ILMN_2124802	MT1H	metallothionein 1H (MT1H), mRNA.	NM_005951.2	7.77	6.99	-0.78	3.4
ILMN_1757237	DDEF2	development and differentiation enhancing factor 2 (DDEF2), mRNA.	NM_003887.1	9.14	9.83	0.69	3.4
ILMN_1696432	IDH1	isocitrate dehydrogenase 1 (NADP+), soluble (IDH1), mRNA.	NM_005896.2	9.9	9.16	-0.74	3.38
ILMN_1734781	IFNE1	interferon epsilon 1 (IFNE1), mRNA.	NM_176891.3	6.48	7.08	0.6	3.35
ILMN_2340027	TSPAN4	tetraspanin 4 (TSPAN4), transcript variant 6, mRNA.	NM_001025238.1	7.38	8.06	0.67	3.35
ILMN_2413318	CCDC32	coiled-coil domain containing 32 (CCDC32), transcript variant 3, mRNA.	NM_001080791.1	7.84	8.44	0.6	3.33
ILMN_1690523	LRRC20	leucine rich repeat containing 20 (LRRC20), transcript variant 2, mRNA.	NM_018239.2	9.47	8.89	-0.58	3.3
ILMN_1800311	HSF2	heat shock transcription factor 2 (HSF2), mRNA.	NM_004506.2	8.69	8.14	-0.55	3.3
ILMN_1673917	GTF2I	general transcription factor II, i (GTF2I), transcript variant 3, mRNA.	NM_033001.1	8.47	9.08	0.62	3.3
ILMN_1779144	CLEC2A	C-type lectin domain family 2, member A (CLEC2A), mRNA.	NM_207375.1	5.85	6.53	0.68	3.3
ILMN_1758672	FAM107B	family with sequence similarity 107, member B (FAM107B), mRNA.	NM_031453.2	9.43	10.15	0.72	3.3
ILMN_1655165	RNF138	ring finger protein 138 (RNF138), transcript variant 1, mRNA.	NM_016271.3	7.9	7.24	-0.66	3.29
ILMN_2138801	TP73L	tumor protein p73-like (TP73L), mRNA.	NM_003722.3	11.71	12.64	0.93	3.29
ILMN_2162860	SLFN11	schlafen family member 11 (SLFN11), mRNA.	NM_152270.2	7.42	6.84	-0.58	3.27
ILMN_1770641	KLHL3	kelch-like 3 (Drosophila) (KLHL3), mRNA.	NM_017415.1	6.98	6.38	-0.6	3.26
ILMN_1711048	ZBTB17	zinc finger and BTB domain containing 17 (ZBTB17), mRNA.	NM_003443.1	8.22	8.82	0.6	3.25
ILMN_1697729	MAP2K6	mitogen-activated protein kinase kinase 6 (MAP2K6), mRNA.	NM_002758.3	6.39	5.85	-0.54	3.23
ILMN_1663873	MMP13	matrix metallopeptidase 13 (collagenase 3) (MMP13), mRNA.	NM_002427.2	7.21	8.09	0.88	3.23
ILMN_1776077	SF1	splicing factor 1 (SF1), transcript variant 4, mRNA.	NM_201997.1	7.74	8.56	0.82	3.23
ILMN_2347193	GSDML	gasdermin-like (GSDML), transcript variant 2, mRNA.	NM_018530.2	8.08	7.4	-0.68	3.22
ILMN_2238928	RAD51C	RAD51 homolog C (S. cerevisiae) (RAD51C), transcript variant 1, mRNA.	NM_058216.1	10.24	9.69	-0.54	3.21
ILMN_1677693	GPR109B	G protein-coupled receptor 109B (GPR109B), mRNA.	NM_006018.1	7.18	6.58	-0.61	3.2
ILMN_1722981	TLR5	toll-like receptor 5 (TLR5), mRNA.	NM_003268.4	8.27	7.69	-0.58	3.19
ILMN_1746158	HOXD11	homeobox D11 (HOXD11), mRNA.	NM_021192.2	7.91	8.54	0.63	3.19
ILMN_1668465	KIAA1609	KIAA1609 (KIAA1609), mRNA.	NM_020947.2	7.6	8.18	0.58	3.19
ILMN_1893679		BX098660 Soares placenta Nb2HP cDNA clone IMAGp998L03214, mRNA sequence		7.49	6.78	-0.72	3.14
ILMN_1879480		cDNA FLJ35319 fis, clone PROST2011577		7.77	7.12	-0.65	3.14
ILMN_2404917	AFAP1L2	actin filament associated protein 1-like 2 (AFAP1L2), transcript variant 2, mRNA.	NM_032550.2	10.27	10.81	0.54	3.14
ILMN_1662038	LARGE	like-glycosyltransferase (LARGE), transcript variant 1, mRNA.	NM_004737.3	7.79	8.3	0.51	3.14
ILMN_1712684	FAM20C	family with sequence similarity 20, member C (FAM20C), mRNA.	NM_020223.2	7.98	8.54	0.56	3.14
ILMN_1712628	GTF2IRD1	GTF2I repeat domain containing 1 (GTF2IRD1), transcript variant 1, mRNA.	NM_016328.1	7.84	8.43	0.58	3.14
ILMN_1733937	MMD	monocyte to macrophage differentiation-associated (MMD), mRNA.	NM_012329.2	7.16	7.78	0.63	3.14
ILMN_2381476	SPG3A	spastic paraplegia 3A (autosomal dominant) (SPG3A), transcript variant 2, mRNA.	NM_181598.2	7.94	7.42	-0.52	3.12
ILMN_2214355	RAB30	RAB30, member RAS oncogene family (RAB30), mRNA.	NM_014488.3	6.98	7.65	0.67	3.12
ILMN_2051731	DUSP5P	dual specificity phosphatase 5 pseudogene (DUSP5P) on chromosome 1.	NR_002834.1	6.92	6.3	-0.62	3.1
ILMN_1746618	PAQR7	progestin and adipoQ receptor family member VII (PAQR7), mRNA.	NM_178422.4	9.06	8.39	-0.67	3.1
ILMN_1800332	NGB	neuroglobin (NGB), mRNA.	NM_021257.3	7.04	7.65	0.61	3.1
ILMN_1655922	SAPS2	PREDICTED: SAPS domain family, member 2, transcript variant 2 (SAPS2), mRNA.	XM_942540.1	10.33	10.83	0.5	3.1
ILMN_1786197	NR2F1	nuclear receptor subfamily 2, group F, member 1 (NR2F1), mRNA.	NM_005654.4	8.99	8.41	-0.58	3.09
ILMN_1802082	PRDM8	PR domain containing 8 (PRDM8), transcript variant 1, mRNA.	NM_020226.3	6.87	7.57	0.7	3.08
ILMN_1664283	C9orf75	chromosome 9 open reading frame 75 (C9orf75), mRNA.	NM_173691.2	8.26	7.67	-0.59	3.07
ILMN_1798210	E2F7	E2F transcription factor 7 (E2F7), mRNA.	NM_203394.2	9.57	10.19	0.62	3.07
ILMN_1657996	LOC642035	PREDICTED: hypothetical protein LOC642035 (LOC642035), mRNA.	XM_936105.1	7	7.63	0.63	3.05
ILMN_1789058	C1orf188	chromosome 1 open reading frame 188 (C1orf188), mRNA.	NM_173795.2	8.32	7.77	-0.55	3.03
ILMN_1810591	PUS10	pseudouridylate synthase 10 (PUS10), mRNA.	NM_144709.1	7.29	7.91	0.62	3
ILMN_1678799	RAPGEF1	Rap guanine nucleotide exchange factor (GEF) 1 (RAPGEF1), transcript variant 2, mRNA.	NM_198679.1	6.78	7.44	0.65	3
ILMN_2057479	EGFL6	EGF-like-domain, multiple 6 (EGFL6), mRNA.	NM_015507.2	6.81	6.21	-0.61	2.99
ILMN_1655796	39875	PREDICTED: membrane-associated ring finger (C3HC4) 3 (MARCH3), mRNA.	XM_001127871.1	8.1	8.69	0.6	2.98
ILMN_1787186	NOV	nephroblastoma overexpressed gene (NOV), mRNA.	NM_002514.2	7.18	6.58	-0.6	2.96
ILMN_1651964	ABCC5	ATP-binding cassette, sub-family C (CFTR/MRP), member 5 (ABCC5), transcript variant 2, mRNA.	NM_001023587.1	10.29	9.77	-0.52	2.96
ILMN_1689251	SPG3A	spastic paraplegia 3A (autosomal dominant) (SPG3A), transcript variant 1, mRNA.	NM_015915.3	7.62	7	-0.63	2.95
ILMN_1723418	CEL	carboxyl ester lipase (bile salt-stimulated lipase) (CEL), mRNA.	NM_001807.3	8.68	8.1	-0.58	2.95
ILMN_2294976	RNASE4	ribonuclease, RNase A family, 4 (RNASE4), transcript variant 1, mRNA.	NM_194430.1	7.49	6.86	-0.63	2.93
ILMN_1735014	KLF6	Kruppel-like factor 6 (KLF6), transcript variant 2, mRNA.	NM_001300.4	10.46	10.97	0.51	2.92
ILMN_1798602	PCF11	PCF11, cleavage and polyadenylation factor subunit, homolog (S. cerevisiae) (PCF11), mRNA.	NM_015885.2	9	8.17	-0.84	2.91
ILMN_1798855	RASSF9	Ras association (RalGDS/AF-6) domain family (N-terminal) member 9 (RASSF9), mRNA.	NM_005447.3	6.01	6.55	0.54	2.91
ILMN_1699644	39875	PREDICTED: membrane-associated ring finger (C3HC4) 3 (MARCH3), mRNA.	XM_001127871.1	8.16	8.7	0.54	2.89
ILMN_1689004	TNFRSF12A	tumor necrosis factor receptor superfamily, member 12A (TNFRSF12A), mRNA.	NM_016639.1	10.5	11.17	0.66	2.89
ILMN_2249018	LOC389816	cytokeratin associated protein (LOC389816), mRNA.	NM_001013653.1	7.98	7.42	-0.56	2.88
ILMN_1653712	UAP1L1	UDP-N-acteylglucosamine pyrophosphorylase 1-like 1 (UAP1L1), mRNA.	NM_207309.1	7.67	7.16	-0.51	2.87
ILMN_1686261	TOM1L2	target of myb1-like 2 (chicken) (TOM1L2), transcript variant 3, mRNA.	NM_001082968.1	7.38	6.83	-0.55	2.87
ILMN_2070896	BMPR2	bone morphogenetic protein receptor, type II (serine/threonine kinase) (BMPR2), mRNA.	NM_001204.5	8.98	9.66	0.68	2.86
ILMN_1792679	ITGA5	integrin, alpha 5 (fibronectin receptor, alpha polypeptide) (ITGA5), mRNA.	NM_002205.2	7.32	7.96	0.63	2.86
ILMN_1676336	AADACL1	arylacetamide deacetylase-like 1 (AADACL1), mRNA.	NM_020792.3	9.11	8.56	-0.55	2.85
ILMN_1750497	GPR109A	G protein-coupled receptor 109A (GPR109A), mRNA.	NM_177551.3	7.48	6.81	-0.67	2.85
ILMN_1674629	C9orf3	chromosome 9 open reading frame 3 (C9orf3), mRNA.	NM_032823.3	8.43	8.95	0.52	2.84
ILMN_1764619	FLJ45244	FLJ45244 protein (FLJ45244), mRNA.	NM_207443.1	7.41	6.74	-0.67	2.82
ILMN_1749044	PVRL4	poliovirus receptor-related 4 (PVRL4), mRNA.	NM_030916.1	6.92	6.27	-0.65	2.81
ILMN_1715555	DBP	D site of albumin promoter (albumin D-box) binding protein (DBP), mRNA.	NM_001352.2	7.1	6.46	-0.64	2.79
ILMN_1715401	MT1G	metallothionein 1G (MT1G), mRNA.	NM_005950.1	8.56	7.96	-0.6	2.78
ILMN_1731609	CHMP6	PREDICTED: chromatin modifying protein 6 (CHMP6), mRNA.	XM_001132548.1	7.53	8.06	0.52	2.77
ILMN_1681252	C17orf44	chromosome 17 open reading frame 44 (C17orf44), mRNA.	NM_173621.1	7.13	6.54	-0.59	2.75
ILMN_2239754	IFIT3	interferon-induced protein with tetratricopeptide repeats 3 (IFIT3), mRNA.	NM_001549.2	8	7.22	-0.78	2.74
ILMN_1697971	TRIM38	tripartite motif-containing 38 (TRIM38), mRNA.	NM_006355.2	8.55	7.92	-0.64	2.74
ILMN_1799579	CCDC51	coiled-coil domain containing 51 (CCDC51), mRNA.	NM_024661.3	8.91	8.34	-0.57	2.73
ILMN_1755954	CPEB3	cytoplasmic polyadenylation element binding protein 3 (CPEB3), mRNA.	NM_014912.3	9.04	8.36	-0.68	2.7
ILMN_2043079	ILDR1	immunoglobulin-like domain containing receptor 1 (ILDR1), mRNA.	NM_175924.2	7.26	6.7	-0.56	2.69
ILMN_2410826	OAS1	2',5'-oligoadenylate synthetase 1, 40/46kDa (OAS1), transcript variant 3, mRNA.	NM_001032409.1	6.97	6.23	-0.73	2.68
ILMN_1745262	REM2	RAS (RAD and GEM)-like GTP binding 2 (REM2), mRNA.	NM_173527.2	7.52	6.97	-0.55	2.68
ILMN_1700144	ITGA10	integrin, alpha 10 (ITGA10), mRNA.	NM_003637.3	6.88	6.34	-0.55	2.68
ILMN_1722811	CDKN1B	cyclin-dependent kinase inhibitor 1B (p27, Kip1) (CDKN1B), mRNA.	NM_004064.2	9.56	8.77	-0.79	2.63
ILMN_1917095		DA697821 NT2NE2 cDNA clone NT2NE2019092 5, mRNA sequence		5.96	6.47	0.51	2.59
ILMN_1824391		EST384910 MAGE resequences, MAGL cDNA, mRNA sequence		8.22	8.75	0.53	2.56
ILMN_1681467	RAB11FIP4	RAB11 family interacting protein 4 (class II) (RAB11FIP4), mRNA.	NM_032932.3	7.2	6.62	-0.58	2.53
ILMN_1718629	NRIP1	nuclear receptor interacting protein 1 (NRIP1), mRNA.	NM_003489.2	9.24	9.98	0.74	2.5
ILMN_1762308	LOC654191	PREDICTED: similar to similar to RIKEN cDNA 4933437K13 (LOC654191), mRNA.	XM_940642.1	8.63	9.14	0.51	2.47
ILMN_1700202	TMEM135	transmembrane protein 135 (TMEM135), mRNA.	NM_022918.2	8.18	7.59	-0.59	2.45
ILMN_2055156	PAG1	phosphoprotein associated with glycosphingolipid microdomains 1 (PAG1), mRNA.	NM_018440.3	6.55	7.08	0.53	2.45
ILMN_1714170	SPSB1	splA/ryanodine receptor domain and SOCS box containing 1 (SPSB1), mRNA.	NM_025106.2	7.97	7.45	-0.52	2.41
ILMN_1653026	PLAC8	placenta-specific 8 (PLAC8), mRNA.	NM_016619.1	7.85	7.31	-0.54	2.41
ILMN_2372413	BID	BH3 interacting domain death agonist (BID), transcript variant 3, mRNA.	NM_197967.1	8.23	7.69	-0.54	2.4
ILMN_1752008	OTUD1	PREDICTED: OTU domain containing 1 (OTUD1), mRNA.	XM_939698.1	7.97	8.54	0.56	2.4
ILMN_1693233	KIAA0513	KIAA0513 (KIAA0513), mRNA.	NM_014732.2	7.46	6.91	-0.55	2.39
ILMN_1719696	PLD1	phospholipase D1, phosphatidylcholine-specific (PLD1), mRNA.	NM_002662.2	7.58	7.03	-0.54	2.39
ILMN_1805466	SOX9	SRY (sex determining region Y)-box 9 (campomelic dysplasia, autosomal sex-reversal) (SOX9), mRNA.	NM_000346.2	8.91	9.64	0.72	2.37
ILMN_1761422	LOC440349	PREDICTED: similar to nuclear pore complex interacting protein, transcript variant 1 (LOC440349), mRNA.	XM_496129.2	6.97	7.7	0.73	2.37
ILMN_1838655		full-length cDNA clone CS0DI053YO09 of Placenta Cot 25-normalized of (human)		6.79	7.32	0.54	2.36
ILMN_1687556	DAPL1	death associated protein-like 1 (DAPL1), mRNA.	NM_001017920.1	6.82	6.25	-0.56	2.33
ILMN_1741159	MAP3K8	mitogen-activated protein kinase kinase kinase 8 (MAP3K8), mRNA.	NM_005204.2	8.22	7.68	-0.54	2.31
ILMN_2412380	TSC22D1	TSC22 domain family, member 1 (TSC22D1), transcript variant 1, mRNA.	NM_183422.1	9.67	10.28	0.6	2.31
ILMN_2075927	STK40	serine/threonine kinase 40 (STK40), mRNA.	NM_032017.1	9.77	10.28	0.51	2.29
ILMN_1793990	ID2	inhibitor of DNA binding 2, dominant negative helix-loop-helix protein (ID2), mRNA.	NM_002166.4	8.77	8.2	-0.57	2.28
ILMN_2133100	LPIN2	lipin 2 (LPIN2), mRNA.	NM_014646.2	7.65	8.16	0.52	2.25
ILMN_1752247	AKAP13	A kinase (PRKA) anchor protein 13 (AKAP13), transcript variant 1, mRNA.	NM_006738.4	7.71	8.24	0.53	2.22
ILMN_2075757	LRIG3	leucine-rich repeats and immunoglobulin-like domains 3 (LRIG3), mRNA.	NM_153377.3	7.66	8.27	0.61	2.22
ILMN_2388585	GOPC	golgi associated PDZ and coiled-coil motif containing (GOPC), transcript variant 1, mRNA.	NM_020399.2	8.06	8.63	0.57	2.17
ILMN_2294978	RNASE4	ribonuclease, RNase A family, 4 (RNASE4), transcript variant 1, mRNA.	NM_194430.1	7.6	7.03	-0.58	2.12
ILMN_1679838	WBP5	WW domain binding protein 5 (WBP5), transcript variant 2, mRNA.	NM_001006612.1	11.1	10.58	-0.51	2.12
ILMN_1741869	WDR47	WD repeat domain 47 (WDR47), mRNA.	NM_014969.4	9.09	8.54	-0.55	2.12
ILMN_1855278		EST366269 MAGE resequences, MAGC cDNA, mRNA sequence		8.09	8.6	0.5	2.11
ILMN_1670932	LOC645737	PREDICTED: similar to 60S ribosomal protein L7, transcript variant 1 (LOC645737), mRNA.	XM_930508.1	8.55	7.73	-0.82	2.08
ILMN_1749636	FLJ13236	hypothetical protein FLJ13236 (FLJ13236), mRNA.	NM_024902.2	5.86	6.37	0.51	2.07
ILMN_1763666	ALDH3B2	aldehyde dehydrogenase 3 family, member B2 (ALDH3B2), transcript variant 2, mRNA.	NM_001031615.1	7.52	6.96	-0.56	2.03
ILMN_1783998	STARD5	StAR-related lipid transfer (START) domain containing 5 (STARD5), mRNA.	NM_181900.2	7.12	6.49	-0.63	2.03
ILMN_1739645	ANLN	anillin, actin binding protein (ANLN), mRNA.	NM_018685.2	11.04	10.36	-0.68	2.01
ILMN_2318643	TGIF1	TGFB-induced factor homeobox 1 (TGIF1), transcript variant 1, mRNA.	NM_170695.2	8.57	9.07	0.51	2

## Sheet: 12h TGFb
Illumina Identifier	HGNC gene symbol	Gene Description	Refseq ID	UT 12h	UT+TGFb 12h	LR +/- TGFb 12h	-log10 pVAL LR +/- TGFb 12h
ILMN_1655595	SERPINE2	serpin peptidase inhibitor, clade E (nexin, plasminogen activator inhibitor type 1), member 2 (SERPINE2), mRNA.	NM_006216.2	9.78	14.98	5.2	52.48
ILMN_1744381	SERPINE1	serpin peptidase inhibitor, clade E (nexin, plasminogen activator inhibitor type 1), member 1 (SERPINE1), mRNA.	NM_000602.1	7	12.62	5.62	45.75
ILMN_1776936	ANKRD38	ankyrin repeat domain 38 (ANKRD38), mRNA.	NM_181712.3	6.76	11.93	5.17	43.93
ILMN_1705750	TGM2	transglutaminase 2 (C polypeptide, protein-glutamine-gamma-glutamyltransferase) (TGM2), transcript variant 1, mRNA.	NM_004613.2	5.99	12.15	6.16	42.86
ILMN_1667295	VASN	vasorin (VASN), mRNA.	NM_138440.2	6.46	10.08	3.62	39.39
ILMN_2174711	C21orf129	chromosome 21 open reading frame 129 (C21orf129), mRNA.	NM_152506.1	10.49	6.59	-3.9	38.91
ILMN_2115125	CTGF	connective tissue growth factor (CTGF), mRNA.	NM_001901.2	7.09	11.22	4.13	36.59
ILMN_1777233	E2F2	E2F transcription factor 2 (E2F2), mRNA.	NM_004091.2	10.11	6.48	-3.63	35.99
ILMN_1713995	SCNN1A	sodium channel, nonvoltage-gated 1 alpha (SCNN1A), mRNA.	NM_001038.4	12.46	8.75	-3.71	34.98
ILMN_1699829	CTGF	connective tissue growth factor (CTGF), mRNA.	NM_001901.1	7.18	11.38	4.2	34.98
ILMN_1769201	ELF3	E74-like factor 3 (ets domain transcription factor, epithelial-specific ) (ELF3), mRNA.	NM_004433.3	10.44	6.3	-4.14	34.92
ILMN_1892643		RST11549 Athersys RAGE Library cDNA, mRNA sequence		6.82	10.64	3.82	34.68
ILMN_1698666	CST6	cystatin E/M (CST6), mRNA.	NM_001323.2	6.53	9.92	3.39	34.33
ILMN_1659610	TJP3	tight junction protein 3 (zona occludens 3) (TJP3), mRNA.	NM_014428.1	10.99	7.12	-3.87	34.11
ILMN_1728799	FBP1	fructose-1,6-bisphosphatase 1 (FBP1), mRNA.	NM_000507.2	10.98	7.79	-3.18	33.89
ILMN_1748591	ODC1	ornithine decarboxylase 1 (ODC1), mRNA.	NM_002539.1	8.53	11.51	2.98	33.87
ILMN_2072568	CLDN8	claudin 8 (CLDN8), mRNA.	NM_199328.1	11.48	7.75	-3.74	33.03
ILMN_1701424	LAMC2	laminin, gamma 2 (LAMC2), transcript variant 1, mRNA.	NM_005562.1	10.83	13.69	2.86	33.03
ILMN_1779228	CDH2	cadherin 2, type 1, N-cadherin (neuronal) (CDH2), mRNA.	NM_001792.2	9.68	12.25	2.57	32.7
ILMN_1653028	COL4A1	collagen, type IV, alpha 1 (COL4A1), mRNA.	NM_001845.4	9.29	12.03	2.75	31.81
ILMN_2399300	NAV2	neuron navigator 2 (NAV2), transcript variant 2, mRNA.	NM_145117.3	7.86	11.07	3.2	30.79
ILMN_2309156	PMEPA1	prostate transmembrane protein, androgen induced 1 (PMEPA1), transcript variant 2, mRNA.	NM_199169.1	10.23	12.85	2.62	30.79
ILMN_1716687	TPM1	tropomyosin 1 (alpha) (TPM1), transcript variant 7, mRNA.	NM_001018020.1	11.11	13.55	2.44	30.63
ILMN_1713829	PTGES	prostaglandin E synthase (PTGES), mRNA.	NM_004878.3	12.11	8.82	-3.29	30.57
ILMN_1810942	CYP3A5	cytochrome P450, family 3, subfamily A, polypeptide 5 (CYP3A5), mRNA.	NM_000777.2	9.51	5.8	-3.71	30.37
ILMN_1766650	FOXA1	forkhead box A1 (FOXA1), mRNA.	NM_004496.2	11.83	8.65	-3.18	29.63
ILMN_1730670	FSTL3	follistatin-like 3 (secreted glycoprotein) (FSTL3), mRNA.	NM_005860.2	7.86	10.79	2.93	29.63
ILMN_1697733	CST6	PREDICTED: cystatin E/M (CST6), mRNA.	XM_001129442.1	6.31	9.44	3.13	29.26
ILMN_2111237	MN1	meningioma (disrupted in balanced translocation) 1 (MN1), mRNA.	NM_002430.2	8.12	10.61	2.49	28.97
ILMN_1700081	FST	follistatin (FST), transcript variant FST344, mRNA.	NM_013409.1	11.11	13.92	2.81	28.89
ILMN_1812073	ATP6V1B1	ATPase, H+ transporting, lysosomal 56/58kDa, V1 subunit B1 (Renal tubular acidosis with deafness) (ATP6V1B1), mRNA.	NM_001692.3	12.37	7.91	-4.46	28.81
ILMN_1735157	GALNT12	UDP-N-acetyl-alpha-D-galactosamine:polypeptide N-acetylgalactosaminyltransferase 12 (GalNAc-T12) (GALNT12), mRNA.	NM_024642.3	10.63	8.33	-2.3	28.44
ILMN_1685339	TPM1	tropomyosin 1 (alpha) (TPM1), transcript variant 6, mRNA.	NM_001018008.1	8.19	11.02	2.84	28.43
ILMN_1673566	ADAMTS1	ADAM metallopeptidase with thrombospondin type 1 motif, 1 (ADAMTS1), mRNA.	NM_006988.3	7.71	10.91	3.2	28.24
ILMN_1712896	FST	follistatin (FST), transcript variant FST317, mRNA.	NM_006350.2	8.36	11.59	3.22	27.73
ILMN_1741847	MMP10	matrix metallopeptidase 10 (stromelysin 2) (MMP10), mRNA.	NM_002425.1	9.98	12.78	2.8	27.61
ILMN_1669046	FOXQ1	forkhead box Q1 (FOXQ1), mRNA.	NM_033260.3	13.32	10.8	-2.52	27.59
ILMN_1682775	EDN1	endothelin 1 (EDN1), mRNA.	NM_001955.2	7.7	10.49	2.8	27.44
ILMN_1717990	CALD1	caldesmon 1 (CALD1), transcript variant 1, mRNA.	NM_033138.2	6.55	9.18	2.63	27.38
ILMN_1714433	MARCKSL1	MARCKS-like 1 (MARCKSL1), mRNA.	NM_023009.4	8.88	10.76	1.87	27.26
ILMN_2146761	FABP5	fatty acid binding protein 5 (psoriasis-associated) (FABP5), mRNA.	NM_001444.1	8.04	10.95	2.91	27.24
ILMN_1712475	HS3ST2	heparan sulfate (glucosamine) 3-O-sulfotransferase 2 (HS3ST2), mRNA.	NM_006043.1	8.83	11.5	2.67	27.19
ILMN_2188722	GLS	glutaminase (GLS), mRNA.	NM_014905.2	10.09	12.29	2.2	27.11
ILMN_1737184	CDCA7	cell division cycle associated 7 (CDCA7), transcript variant 1, mRNA.	NM_031942.4	11.03	8.38	-2.65	27.02
ILMN_1719695	NFKBIZ	nuclear factor of kappa light polypeptide gene enhancer in B-cells inhibitor, zeta (NFKBIZ), transcript variant 2, mRNA.	NM_001005474.1	11.59	9.28	-2.31	27.02
ILMN_1702501	RPS6KA2	ribosomal protein S6 kinase, 90kDa, polypeptide 2 (RPS6KA2), transcript variant 2, mRNA.	NM_001006932.1	8.46	10.53	2.07	26.77
ILMN_2278152	TPM1	tropomyosin 1 (alpha) (TPM1), transcript variant 6, mRNA.	NM_001018008.1	8.22	11.04	2.83	26.76
ILMN_1753439	RPTN	PREDICTED: repetin (RPTN), mRNA.	XM_937200.2	8.84	6.06	-2.78	26.62
ILMN_1811470	PLEK2	pleckstrin 2 (PLEK2), mRNA.	NM_016445.1	8.46	11.11	2.65	26.62
ILMN_1778668	TAGLN	transgelin (TAGLN), transcript variant 2, mRNA.	NM_003186.3	8.75	11.73	2.98	26.6
ILMN_1864372		BX097797 Soares_pregnant_uterus_NbHPU cDNA clone IMAGp998N171164, mRNA sequence		7.15	10.01	2.86	26.57
ILMN_1653934	LOC650517	PREDICTED: hypothetical LOC650517 (LOC650517), mRNA.	XR_019109.1	10.13	13.16	3.03	26.5
ILMN_1672148	AKR1B10	aldo-keto reductase family 1, member B10 (aldose reductase) (AKR1B10), mRNA.	NM_020299.3	10.06	7.26	-2.8	26.48
ILMN_1651950	TPST1	tyrosylprotein sulfotransferase 1 (TPST1), mRNA.	NM_003596.2	8.29	10.17	1.88	26.48
ILMN_2365465	XBP1	X-box binding protein 1 (XBP1), transcript variant 2, mRNA.	NM_001079539.1	9.98	11.77	1.79	26.48
ILMN_1746676	CLDN8	claudin 8 (CLDN8), mRNA.	NM_199328.1	10.09	7.02	-3.06	26.27
ILMN_1706505	COL5A1	collagen, type V, alpha 1 (COL5A1), mRNA.	NM_000093.3	7.39	10.12	2.73	26.08
ILMN_2203891	SMAD7	SMAD family member 7 (SMAD7), mRNA.	NM_005904.2	7.8	9.75	1.95	26.05
ILMN_1732197	MN1	meningioma (disrupted in balanced translocation) 1 (MN1), mRNA.	NM_002430.2	7.8	9.99	2.19	26.01
ILMN_1794239	C4orf26	chromosome 4 open reading frame 26 (C4orf26), mRNA.	NM_178497.2	5.53	7.79	2.26	25.9
ILMN_1651826	BASP1	brain abundant, membrane attached signal protein 1 (BASP1), mRNA.	NM_006317.3	7.36	10.19	2.84	25.8
ILMN_2360710	TPM1	tropomyosin 1 (alpha) (TPM1), transcript variant 3, mRNA.	NM_001018004.1	12	14.36	2.36	25.66
ILMN_1704247	LAMA3	laminin, alpha 3 (LAMA3), transcript variant 2, mRNA.	NM_000227.2	7.26	9.47	2.22	25.48
ILMN_1655740	SNAI2	snail homolog 2 (Drosophila) (SNAI2), mRNA.	NM_003068.3	9.38	11.65	2.26	25.27
ILMN_1731433	ABP1	amiloride binding protein 1 (amine oxidase (copper-containing)) (ABP1), mRNA.	NM_001091.2	9.05	6.46	-2.6	25.2
ILMN_1736190	CYP4F3	cytochrome P450, family 4, subfamily F, polypeptide 3 (CYP4F3), mRNA.	NM_000896.1	10.95	8.67	-2.28	24.87
ILMN_1749414	MGC4294	PREDICTED: hypothetical protein MGC4294 (MGC4294), misc RNA.	XR_017834.1	5.88	7.63	1.75	24.81
ILMN_1738552	SLC1A3	solute carrier family 1 (glial high affinity glutamate transporter), member 3 (SLC1A3), mRNA.	NM_004172.3	10.42	8.26	-2.16	24.73
ILMN_1797776	PRSS23	protease, serine, 23 (PRSS23), mRNA.	NM_007173.4	9.63	11.87	2.24	24.73
ILMN_2399304	NAV2	neuron navigator 2 (NAV2), transcript variant 2, mRNA.	NM_145117.3	6.37	8.8	2.44	24.66
ILMN_1747217	C15orf41	chromosome 15 open reading frame 41 (C15orf41), mRNA.	NM_032499.3	10.31	8.31	-2	24.62
ILMN_1688892	LAMA3	laminin, alpha 3 (LAMA3), transcript variant 1, mRNA.	NM_198129.1	9.78	12.2	2.42	24.53
ILMN_2162253	NMU	neuromedin U (NMU), mRNA.	NM_006681.1	12.44	10.35	-2.09	24.49
ILMN_1806023	JUN	jun oncogene (JUN), mRNA.	NM_002228.3	8.36	11.21	2.84	24.46
ILMN_1860963		UI-E-EJ0-ahj-d-03-0-UI.r2 UI-E-EJ0 cDNA clone UI-E-EJ0-ahj-d-03-0-UI 5, mRNA sequence		8.18	6.27	-1.91	24.44
ILMN_1768534	BHLHB2	basic helix-loop-helix domain containing, class B, 2 (BHLHB2), mRNA.	NM_003670.1	9.66	11.87	2.2	24.41
ILMN_2233334	MYH16	myosin, heavy chain 16 pseudogene (MYH16) on chromosome 7.	NR_002147.2	6.09	8.25	2.17	24.4
ILMN_1695290	FERMT2	fermitin family homolog 2 (Drosophila) (FERMT2), mRNA.	NM_006832.1	8.34	10.51	2.17	24.35
ILMN_1728662	ALDH3B1	aldehyde dehydrogenase 3 family, member B1 (ALDH3B1), transcript variant 1, mRNA.	NM_000694.2	8.82	6.54	-2.28	24.31
ILMN_1809590	GINS2	GINS complex subunit 2 (Psf2 homolog) (GINS2), mRNA.	NM_016095.1	10.82	8.99	-1.83	24.23
ILMN_1673721	EXO1	exonuclease 1 (EXO1), transcript variant 1, mRNA.	NM_006027.3	9.16	7.06	-2.09	24.19
ILMN_1811468	IRX3	iroquois homeobox 3 (IRX3), mRNA.	NM_024336.1	13.39	11.74	-1.65	24.19
ILMN_1706519	LAMC2	laminin, gamma 2 (LAMC2), transcript variant 2, mRNA.	NM_018891.1	7.18	10.35	3.17	24.1
ILMN_1788931	DOCK8	dedicator of cytokinesis 8 (DOCK8), mRNA.	NM_203447.1	8.23	5.79	-2.44	24.08
ILMN_1695604	DCBLD1	discoidin, CUB and LCCL domain containing 1 (DCBLD1), mRNA.	NM_173674.1	9.4	12.03	2.63	23.97
ILMN_1734276	PMEPA1	prostate transmembrane protein, androgen induced 1 (PMEPA1), transcript variant 2, mRNA.	NM_199169.1	11.23	13.4	2.17	23.96
ILMN_2400644	SRGAP3	SLIT-ROBO Rho GTPase activating protein 3 (SRGAP3), transcript variant 2, mRNA.	NM_001033117.1	9.83	7.47	-2.36	23.94
ILMN_1670238	CDC45L	CDC45 cell division cycle 45-like (S. cerevisiae) (CDC45L), mRNA.	NM_003504.3	10.47	8.3	-2.17	23.89
ILMN_1752755	VWF	von Willebrand factor (VWF), mRNA.	NM_000552.3	8.99	6.61	-2.38	23.89
ILMN_1701308	COL1A1	collagen, type I, alpha 1 (COL1A1), mRNA.	NM_000088.3	6.51	8.9	2.38	23.89
ILMN_1814686	BCMO1	beta-carotene 15,15'-monooxygenase 1 (BCMO1), mRNA.	NM_017429.2	7.59	5.74	-1.85	23.82
ILMN_1744765	KRT4	keratin 4 (KRT4), mRNA.	NM_002272.2	10.96	7.42	-3.55	23.78
ILMN_1746502	LOC399978	PREDICTED: hypothetical LOC399978 (LOC399978), mRNA.	XM_944623.2	6.39	9.56	3.17	23.77
ILMN_1800332	NGB	neuroglobin (NGB), mRNA.	NM_021257.3	7.7	10.23	2.52	23.74
ILMN_2163790	CGB5	chorionic gonadotropin, beta polypeptide 5 (CGB5), mRNA.	NM_033043.1	7.31	9.84	2.53	23.66
ILMN_1743130	PTGFRN	prostaglandin F2 receptor negative regulator (PTGFRN), mRNA.	NM_020440.2	10.1	12.11	2.02	23.66
ILMN_1720158	ETS2	v-ets erythroblastosis virus E26 oncogene homolog 2 (avian) (ETS2), mRNA.	NM_005239.4	9.73	11.55	1.81	23.65
ILMN_1666845	KRT17	keratin 17 (KRT17), mRNA.	NM_000422.1	13.65	15.23	1.58	23.65
ILMN_1742151	NRG2	neuregulin 2 (NRG2), transcript variant 6, mRNA.	NM_013985.1	7.72	5.71	-2.02	23.43
ILMN_1881514		cDNA FLJ36847 fis, clone ASTRO2013671		7.14	9.07	1.93	23.43
ILMN_1779648	HIST3H2A	histone cluster 3, H2a (HIST3H2A), mRNA.	NM_033445.2	11.4	9.77	-1.64	23.37
ILMN_1786041	ASB9	ankyrin repeat and SOCS box-containing 9 (ASB9), transcript variant 2, mRNA.	NM_024087.1	10.02	8.07	-1.96	23.35
ILMN_1730487	CALD1	caldesmon 1 (CALD1), transcript variant 5, mRNA.	NM_033140.2	7.8	10.14	2.34	23.35
ILMN_2044645	CGB1	chorionic gonadotropin, beta polypeptide 1 (CGB1), mRNA.	NM_033377.1	8.19	10.44	2.26	23.35
ILMN_2362902	RASSF5	Ras association (RalGDS/AF-6) domain family member 5 (RASSF5), transcript variant 2, mRNA.	NM_182664.2	9.97	7.68	-2.29	23.34
ILMN_1718990	NFRKB	nuclear factor related to kappaB binding protein (NFRKB), mRNA.	NM_006165.2	9.08	7.01	-2.07	23.34
ILMN_1680018	RIPK4	receptor-interacting serine-threonine kinase 4 (RIPK4), mRNA.	NM_020639.2	10.82	8.83	-1.99	23.34
ILMN_1660732	PPP2R2B	protein phosphatase 2 (formerly 2A), regulatory subunit B, beta isoform (PPP2R2B), transcript variant 4, mRNA.	NM_181676.1	12.92	10.91	-2.01	23.32
ILMN_1651237	CDT1	chromatin licensing and DNA replication factor 1 (CDT1), mRNA.	NM_030928.2	10.38	7.74	-2.64	23.26
ILMN_2410929	PAPSS2	3'-phosphoadenosine 5'-phosphosulfate synthase 2 (PAPSS2), transcript variant 1, mRNA.	NM_004670.3	9.47	7.41	-2.06	23.21
ILMN_2406035	LAMA3	laminin, alpha 3 (LAMA3), transcript variant 1, mRNA.	NM_198129.1	11.09	13.23	2.14	23.19
ILMN_2405254	GRB7	growth factor receptor-bound protein 7 (GRB7), transcript variant 2, mRNA.	NM_001030002.1	9.78	7.74	-2.04	23.17
ILMN_1673548	HSPC159	galectin-related protein (HSPC159), mRNA.	NM_014181.1	8.57	10.56	1.99	23.16
ILMN_2166457	HPGD	hydroxyprostaglandin dehydrogenase 15-(NAD) (HPGD), mRNA.	NM_000860.3	9.4	6.87	-2.53	23.14
ILMN_1727689	TNFAIP2	tumor necrosis factor, alpha-induced protein 2 (TNFAIP2), mRNA.	NM_006291.2	8.55	6.1	-2.46	23.13
ILMN_1760247	CD70	CD70 molecule (CD70), mRNA.	NM_001252.3	9.28	7.48	-1.8	22.96
ILMN_2413898	MCM10	minichromosome maintenance complex component 10 (MCM10), transcript variant 2, mRNA.	NM_018518.3	9.42	7.12	-2.29	22.92
ILMN_1653824	LAMC2	laminin, gamma 2 (LAMC2), transcript variant 1, mRNA.	NM_005562.1	8.81	12.02	3.21	22.92
ILMN_1784287	TGFBR3	transforming growth factor, beta receptor III (TGFBR3), mRNA.	NM_003243.2	9.01	6.76	-2.26	22.88
ILMN_2038775	TUBB2A	tubulin, beta 2A (TUBB2A), mRNA.	NM_001069.2	7.27	8.85	1.58	22.86
ILMN_1719759	TNC	tenascin C (hexabrachion) (TNC), mRNA.	NM_002160.2	7.92	10.55	2.63	22.82
ILMN_1790317	RAB26	RAB26, member RAS oncogene family (RAB26), mRNA.	NM_014353.4	10.54	8.18	-2.35	22.77
ILMN_1676192	SLC13A5	solute carrier family 13 (sodium-dependent citrate transporter), member 5 (SLC13A5), mRNA.	NM_177550.2	5.81	8.22	2.41	22.75
ILMN_1663866	TGFBI	transforming growth factor, beta-induced, 68kDa (TGFBI), mRNA.	NM_000358.1	13.41	15.1	1.69	22.66
ILMN_1692754	TMEM49	transmembrane protein 49 (TMEM49), mRNA.	NM_030938.2	11.1	13	1.91	22.64
ILMN_2315979	LBH	limb bud and heart development homolog (mouse) (LBH), mRNA.	NM_030915.1	8.13	10.49	2.36	22.62
ILMN_1812297	CYP26B1	cytochrome P450, family 26, subfamily B, polypeptide 1 (CYP26B1), mRNA.	NM_019885.2	9.27	11.04	1.77	22.58
ILMN_2308903	WFDC3	WAP four-disulfide core domain 3 (WFDC3), transcript variant 2, mRNA.	NM_181522.1	10.17	7.28	-2.89	22.52
ILMN_1685699	PRSS3	protease, serine, 3 (mesotrypsin) (PRSS3), mRNA.	NM_002771.2	8.46	10.1	1.64	22.41
ILMN_1796316	MMP9	matrix metallopeptidase 9 (gelatinase B, 92kDa gelatinase, 92kDa type IV collagenase) (MMP9), mRNA.	NM_004994.2	6.37	9.02	2.65	22.38
ILMN_1716507	EPB41L1	erythrocyte membrane protein band 4.1-like 1 (EPB41L1), transcript variant 1, mRNA.	NM_012156.2	9.49	7.8	-1.69	22.37
ILMN_2360202	PPP2R2B	protein phosphatase 2 (formerly 2A), regulatory subunit B, beta isoform (PPP2R2B), transcript variant 4, mRNA.	NM_181676.1	9.93	7.69	-2.25	22.35
ILMN_2396444	CD14	CD14 molecule (CD14), transcript variant 2, mRNA.	NM_001040021.1	8.75	6.58	-2.17	22.3
ILMN_1714602	CD86	CD86 molecule (CD86), transcript variant 2, mRNA.	NM_006889.3	7.24	9.52	2.28	22.3
ILMN_1713496	ST3GAL5	ST3 beta-galactoside alpha-2,3-sialyltransferase 5 (ST3GAL5), transcript variant 2, mRNA.	NM_001042437.1	6.53	8.71	2.17	22.28
ILMN_1758146	SIRPA	signal-regulatory protein alpha (SIRPA), transcript variant 2, mRNA.	NM_001040023.1	7.45	9.69	2.24	22.22
ILMN_2320330	MAL	mal, T-cell differentiation protein (MAL), transcript variant a, mRNA.	NM_002371.2	10.84	7.95	-2.9	22.2
ILMN_1907544		UI-E-EJ1-ajw-b-16-0-UI.r1 UI-E-EJ1 cDNA clone UI-E-EJ1-ajw-b-16-0-UI 5, mRNA sequence		8.52	6.3	-2.22	22.19
ILMN_1721770	PAPPA	pregnancy-associated plasma protein A, pappalysin 1 (PAPPA), mRNA.	NM_002581.3	6.58	8.79	2.21	22.18
ILMN_1686573	DEFB1	defensin, beta 1 (DEFB1), mRNA.	NM_005218.3	9.62	6.5	-3.13	22.1
ILMN_1721218	KRT13	keratin 13 (KRT13), transcript variant 2, mRNA.	NM_002274.3	14.88	12	-2.88	22.09
ILMN_1772686	FGD3	FYVE, RhoGEF and PH domain containing 3 (FGD3), transcript variant 2, mRNA.	NM_033086.2	10.24	8.11	-2.13	22.09
ILMN_1681890	DYNLT3	dynein, light chain, Tctex-type 3 (DYNLT3), mRNA.	NM_006520.1	8.79	11.29	2.5	22.09
ILMN_1788131	CYP26A1	cytochrome P450, family 26, subfamily A, polypeptide 1 (CYP26A1), transcript variant 2, mRNA.	NM_057157.1	8.02	6.04	-1.98	22.06
ILMN_1800540	CD55	CD55 molecule, decay accelerating factor for complement (Cromer blood group) (CD55), mRNA.	NM_000574.2	6.9	9.17	2.26	22.01
ILMN_1748685	TRIM31	tripartite motif-containing 31 (TRIM31), mRNA.	NM_007028.3	8.28	6.25	-2.02	21.99
ILMN_1682717	IER3	immediate early response 3 (IER3), mRNA.	NM_003897.3	9.87	12.19	2.33	21.98
ILMN_1702487	SGK	serum/glucocorticoid regulated kinase (SGK), mRNA.	NM_005627.2	9.61	11.57	1.96	21.96
ILMN_2205963	C10orf54	chromosome 10 open reading frame 54 (C10orf54), mRNA.	NM_022153.1	11.41	9.74	-1.67	21.94
ILMN_1681503	MCM2	minichromosome maintenance complex component 2 (MCM2), mRNA.	NM_004526.2	9.79	7.72	-2.07	21.84
ILMN_1799819	MARS	methionyl-tRNA synthetase (MARS), mRNA.	NM_004990.2	8.03	9.69	1.66	21.83
ILMN_1796417	ASNS	asparagine synthetase (ASNS), transcript variant 1, mRNA.	NM_133436.1	10.32	12.1	1.78	21.81
ILMN_1677347	KIAA0774	KIAA0774 (KIAA0774), transcript variant 2, mRNA.	NM_015233.5	8.88	6.57	-2.31	21.78
ILMN_2197365	RGS2	regulator of G-protein signalling 2, 24kDa (RGS2), mRNA.	NM_002923.1	11.01	8.69	-2.32	21.74
ILMN_1716608	NGF	nerve growth factor (beta polypeptide) (NGF), mRNA.	NM_002506.2	6.42	8.17	1.76	21.72
ILMN_1775542	FAIM3	Fas apoptotic inhibitory molecule 3 (FAIM3), mRNA.	NM_005449.3	7.31	9.08	1.76	21.72
ILMN_1703955	FBXO32	F-box protein 32 (FBXO32), transcript variant 2, mRNA.	NM_148177.1	11.4	9.34	-2.06	21.71
ILMN_1733998	DHRS9	dehydrogenase/reductase (SDR family) member 9 (DHRS9), transcript variant 1, mRNA.	NM_005771.3	7.71	5.82	-1.9	21.68
ILMN_1788377	COL27A1	collagen, type XXVII, alpha 1 (COL27A1), mRNA.	NM_032888.2	6.49	8.88	2.39	21.65
ILMN_1663401	LARP6	La ribonucleoprotein domain family, member 6 (LARP6), transcript variant 2, mRNA.	NM_197958.1	10.34	11.98	1.63	21.61
ILMN_2336609	SYTL2	synaptotagmin-like 2 (SYTL2), transcript variant e, mRNA.	NM_206929.1	9.36	7.08	-2.28	21.59
ILMN_1838767		clone FP7915 unknown mRNA		11.47	9.52	-1.94	21.5
ILMN_1779711	DTL	denticleless homolog (Drosophila) (DTL), mRNA.	NM_016448.1	7.85	5.95	-1.91	21.38
ILMN_1771120	TMEM45B	transmembrane protein 45B (TMEM45B), mRNA.	NM_138788.3	10.26	7.49	-2.77	21.29
ILMN_1859127		PREDICTED: hypothetical LOC388214 (LOC388214), mRNA		6.9	8.84	1.93	21.28
ILMN_1759232	IRS1	insulin receptor substrate 1 (IRS1), mRNA.	NM_005544.1	7.01	8.98	1.96	21.24
ILMN_1686116	THBS1	thrombospondin 1 (THBS1), mRNA.	NM_003246.2	10.29	13.04	2.75	21.15
ILMN_2142353	GRTP1	growth hormone regulated TBC protein 1 (GRTP1), mRNA.	NM_024719.2	9.31	7.35	-1.96	21.12
ILMN_2210129	PRIM1	primase, DNA, polypeptide 1 (49kDa) (PRIM1), mRNA.	NM_000946.2	9.98	8.27	-1.72	21.12
ILMN_1788107	IL11	interleukin 11 (IL11), mRNA.	NM_000641.2	6.32	8.47	2.15	21.12
ILMN_1667239	INPP1	inositol polyphosphate-1-phosphatase (INPP1), mRNA.	NM_002194.2	11.75	10.12	-1.63	21.1
ILMN_1791328	STK39	serine threonine kinase 39 (STE20/SPS1 homolog, yeast) (STK39), mRNA.	NM_013233.2	11.12	9.62	-1.5	21.04
ILMN_1762561	PLA2G10	phospholipase A2, group X (PLA2G10), mRNA.	NM_003561.1	12.44	10.02	-2.42	20.98
ILMN_2082585	SNAI2	snail homolog 2 (Drosophila) (SNAI2), mRNA.	NM_003068.3	10.05	12.18	2.13	20.93
ILMN_1679262	DPYSL3	dihydropyrimidinase-like 3 (DPYSL3), mRNA.	NM_001387.2	8.42	10.28	1.86	20.88
ILMN_1663787	KLK3	kallikrein-related peptidase 3 (KLK3), transcript variant 6, mRNA.	NM_001030050.1	6.8	9.32	2.52	20.88
ILMN_1710325	SCEL	sciellin (SCEL), transcript variant 2, mRNA.	NM_144777.1	9.22	6.92	-2.3	20.87
ILMN_1779852	LOC387934	PREDICTED: similar to Fatty acid-binding protein, epidermal (E-FABP) (Psoriasis-associated fatty acid-binding protein homolog) (PA-FABP) (LOC387934), mRNA.	XM_937508.2	6.89	9.16	2.28	20.87
ILMN_2170209	RASD2	RASD family, member 2 (RASD2), mRNA.	NM_014310.3	6.01	7.73	1.72	20.87
ILMN_1676728	DLK2	delta-like 2 homolog (Drosophila) (DLK2), transcript variant 2, mRNA.	NM_206539.1	11.67	10.21	-1.46	20.85
ILMN_1674533	TRPV6	transient receptor potential cation channel, subfamily V, member 6 (TRPV6), mRNA.	NM_018646.2	9.09	7.1	-1.99	20.82
ILMN_1653292	PFKFB4	6-phosphofructo-2-kinase/fructose-2,6-biphosphatase 4 (PFKFB4), mRNA.	NM_004567.2	10.04	11.66	1.62	20.8
ILMN_1657823	PMEPA1	prostate transmembrane protein, androgen induced 1 (PMEPA1), transcript variant 1, mRNA.	NM_020182.3	6.32	8.49	2.17	20.77
ILMN_1772824	WNT5B	wingless-type MMTV integration site family, member 5B (WNT5B), transcript variant 1, mRNA.	NM_032642.2	7.93	9.64	1.71	20.71
ILMN_1718607	TSPAN4	tetraspanin 4 (TSPAN4), transcript variant 3, mRNA.	NM_001025235.1	7.91	9.89	1.98	20.68
ILMN_2352921	BPGM	2,3-bisphosphoglycerate mutase (BPGM), transcript variant 1, mRNA.	NM_001724.3	6.92	8.98	2.05	20.64
ILMN_1713751	ADAM19	ADAM metallopeptidase domain 19 (meltrin beta) (ADAM19), transcript variant 2, mRNA.	NM_033274.2	8.33	10.46	2.13	20.62
ILMN_2086077	JUNB	jun B proto-oncogene (JUNB), mRNA.	NM_002229.2	7.58	9.3	1.73	20.6
ILMN_1713927	AMTN	amelotin (AMTN), mRNA.	NM_212557.2	5.72	7.5	1.78	20.58
ILMN_1653856	STS-1	Cbl-interacting protein Sts-1 (STS-1), mRNA.	NM_032873.3	7.92	10.3	2.37	20.56
ILMN_1782944	GPR37L1	G protein-coupled receptor 37 like 1 (GPR37L1), mRNA.	NM_004767.3	7.69	5.82	-1.86	20.54
ILMN_1721626	ARID5B	AT rich interactive domain 5B (MRF1-like) (ARID5B), mRNA.	NM_032199.1	11.56	9.32	-2.25	20.52
ILMN_1685709	TMEM125	transmembrane protein 125 (TMEM125), mRNA.	NM_144626.1	9.01	7.09	-1.93	20.5
ILMN_1765187	LHB	luteinizing hormone beta polypeptide (LHB), mRNA.	NM_000894.2	6.27	8.39	2.11	20.49
ILMN_1726222	FLOT2	flotillin 2 (FLOT2), mRNA.	NM_004475.2	12.49	11.18	-1.32	20.3
ILMN_1771264	ELL3	elongation factor RNA polymerase II-like 3 (ELL3), mRNA.	NM_025165.2	9.69	8.18	-1.51	20.28
ILMN_2093343	PLAC8	placenta-specific 8 (PLAC8), mRNA.	NM_016619.1	9.06	7.33	-1.73	20.26
ILMN_1806607	SFN	stratifin (SFN), mRNA.	NM_006142.3	11.39	12.97	1.58	20.2
ILMN_2116877	OLFM4	olfactomedin 4 (OLFM4), mRNA.	NM_006418.3	12.29	8.49	-3.8	20.13
ILMN_1709348	ALDH1A1	aldehyde dehydrogenase 1 family, member A1 (ALDH1A1), mRNA.	NM_000689.3	11.64	8.36	-3.28	20.08
ILMN_1863962		BX116033 NCI_CGAP_Lu24 cDNA clone IMAGp998A155622, mRNA sequence		9.08	7.18	-1.9	20.03
ILMN_1731064	CABC1	chaperone, ABC1 activity of bc1 complex homolog (S. pombe) (CABC1), nuclear gene encoding mitochondrial protein, mRNA.	NM_020247.4	9.69	8.02	-1.66	19.98
ILMN_1729161	NOTCH1	Notch homolog 1, translocation-associated (Drosophila) (NOTCH1), mRNA.	NM_017617.3	12.55	10.8	-1.75	19.96
ILMN_1805519	CD24	CD24 molecule (CD24), mRNA.	NM_013230.2	10.62	12.15	1.54	19.92
ILMN_1671891	PID1	phosphotyrosine interaction domain containing 1 (PID1), mRNA.	NM_017933.3	6.32	7.83	1.51	19.92
ILMN_1713744	C14orf132	chromosome 14 open reading frame 132 (C14orf132), mRNA.	NM_020215.2	8.12	6.61	-1.51	19.82
ILMN_1671482	GALM	galactose mutarotase (aldose 1-epimerase) (GALM), mRNA.	NM_138801.1	8.59	6.82	-1.77	19.69
ILMN_1670353	RAD51AP1	RAD51 associated protein 1 (RAD51AP1), mRNA.	NM_006479.3	9.82	8.11	-1.71	19.54
ILMN_1808789	MYO5C	myosin VC (MYO5C), mRNA.	NM_018728.2	9.33	7.8	-1.53	19.53
ILMN_1795285	PHF15	PHD finger protein 15 (PHF15), mRNA.	NM_015288.4	9.22	7.4	-1.81	19.49
ILMN_1732404	C2orf15	chromosome 2 open reading frame 15 (C2orf15), mRNA.	NM_144706.2	9.44	7.65	-1.79	19.47
ILMN_1652280	FBXO32	F-box protein 32 (FBXO32), transcript variant 1, mRNA.	NM_058229.2	9.98	8.03	-1.95	19.47
ILMN_1683450	CDCA5	cell division cycle associated 5 (CDCA5), mRNA.	NM_080668.2	11.18	9.6	-1.58	19.31
ILMN_2405305	ARNTL	aryl hydrocarbon receptor nuclear translocator-like (ARNTL), transcript variant 2, mRNA.	NM_001030272.1	7.69	9.49	1.8	19.31
ILMN_1804007	NANOS3	nanos homolog 3 (Drosophila) (NANOS3), mRNA.	NM_001098622.1	7.09	8.92	1.83	19.31
ILMN_1671365	PRODH	proline dehydrogenase (oxidase) 1 (PRODH), nuclear gene encoding mitochondrial protein, mRNA.	NM_016335.2	9.1	7.05	-2.05	19.28
ILMN_1798654	MCM6	minichromosome maintenance complex component 6 (MCM6), mRNA.	NM_005915.4	11.58	10.03	-1.55	19.27
ILMN_1712673	SASH1	SAM and SH3 domain containing 1 (SASH1), mRNA.	NM_015278.3	9.12	7.38	-1.74	19.25
ILMN_1700817	KIAA0774	KIAA0774 (KIAA0774), transcript variant 1, mRNA.	NM_001033602.2	8.45	6.6	-1.85	19.25
ILMN_1726928	TCEA3	transcription elongation factor A (SII), 3 (TCEA3), mRNA.	NM_003196.1	11.56	9.84	-1.72	19.19
ILMN_1811909	LOC402221	PREDICTED: similar to actin alpha 1 skeletal muscle protein (LOC402221), mRNA.	XM_938988.1	8.96	10.96	2	19.19
ILMN_1676689	PPT2	palmitoyl-protein thioesterase 2 (PPT2), transcript variant 2, mRNA.	NM_138717.1	8.52	6.63	-1.89	19.16
ILMN_2388190	SCEL	sciellin (SCEL), transcript variant 1, mRNA.	NM_003843.2	9.16	7.09	-2.07	19.13
ILMN_2096372	ALDH1A1	aldehyde dehydrogenase 1 family, member A1 (ALDH1A1), mRNA.	NM_000689.3	10.83	8.1	-2.73	19.11
ILMN_1794612	UBA7	ubiquitin-like modifier activating enzyme 7 (UBA7), mRNA.	NM_003335.2	8.61	6.96	-1.66	19.11
ILMN_1675656	PPFIBP2	PTPRF interacting protein, binding protein 2 (liprin beta 2) (PPFIBP2), mRNA.	NM_003621.1	11.15	9.24	-1.91	19.1
ILMN_1679391	MAMDC2	MAM domain containing 2 (MAMDC2), mRNA.	NM_153267.3	9.03	10.72	1.69	19.1
ILMN_1726809	BHLHB3	basic helix-loop-helix domain containing, class B, 3 (BHLHB3), mRNA.	NM_030762.1	8.45	6.44	-2.01	19.06
ILMN_1663092	CITED2	Cbp/p300-interacting transactivator, with Glu/Asp-rich carboxy-terminal domain, 2 (CITED2), mRNA.	NM_006079.3	9.8	8.02	-1.78	19.03
ILMN_1805665	FLRT3	fibronectin leucine rich transmembrane protein 3 (FLRT3), transcript variant 2, mRNA.	NM_198391.1	9.39	10.93	1.53	19.03
ILMN_1730794	SERTAD4	SERTA domain containing 4 (SERTAD4), mRNA.	NM_019605.2	8.34	10.31	1.97	18.9
ILMN_1700042	TLN2	talin 2 (TLN2), mRNA.	NM_015059.1	6.73	9.01	2.28	18.85
ILMN_1718977	GADD45B	growth arrest and DNA-damage-inducible, beta (GADD45B), mRNA.	NM_015675.2	7.12	9	1.88	18.84
ILMN_1746309	LOC389791	hypothetical gene supported by AK094537 (LOC389791), mRNA.	NM_001013652.1	9.48	7.73	-1.75	18.82
ILMN_2145670	TNC	tenascin C (hexabrachion) (TNC), mRNA.	NM_002160.1	7.76	9.74	1.97	18.82
ILMN_1715991	SDPR	serum deprivation response (phosphatidylserine binding protein) (SDPR), mRNA.	NM_004657.4	7.73	6.13	-1.6	18.79
ILMN_1797009	F3	coagulation factor III (thromboplastin, tissue factor) (F3), mRNA.	NM_001993.2	8.36	10.38	2.02	18.77
ILMN_1849033		Homo sapiens, clone IMAGE:5403381, mRNA		6.24	7.92	1.69	18.74
ILMN_1720889	SC4MOL	sterol-C4-methyl oxidase-like (SC4MOL), transcript variant 2, mRNA.	NM_001017369.1	10.39	12.08	1.68	18.71
ILMN_1733847	GALR2	galanin receptor 2 (GALR2), mRNA.	NM_003857.2	8.44	6.73	-1.71	18.68
ILMN_1824391		EST384910 MAGE resequences, MAGL cDNA, mRNA sequence		8.5	10.37	1.87	18.68
ILMN_1810025	SLC39A2	solute carrier family 39 (zinc transporter), member 2 (SLC39A2), mRNA.	NM_014579.1	8.5	6.16	-2.34	18.65
ILMN_1795298	GPER	G protein-coupled estrogen receptor 1 (GPER), transcript variant 3, mRNA.	NM_001039966.1	8.52	6.69	-1.83	18.64
ILMN_1769615	FLRT2	fibronectin leucine rich transmembrane protein 2 (FLRT2), mRNA.	NM_013231.4	6.34	8.37	2.03	18.63
ILMN_1696302	FABP5	fatty acid binding protein 5 (psoriasis-associated) (FABP5), mRNA.	NM_001444.1	6.4	8.98	2.58	18.61
ILMN_1751785	DMRT2	doublesex and mab-3 related transcription factor 2 (DMRT2), transcript variant 1, mRNA.	NM_006557.4	8.05	6.17	-1.88	18.59
ILMN_1690223	CNTNAP2	contactin associated protein-like 2 (CNTNAP2), mRNA.	NM_014141.4	8.72	10.25	1.53	18.56
ILMN_1674135	RALGPS1	Ral GEF with PH domain and SH3 binding motif 1 (RALGPS1), mRNA.	NM_014636.1	10.75	8.93	-1.82	18.53
ILMN_1724994	COL4A2	collagen, type IV, alpha 2 (COL4A2), mRNA.	NM_001846.2	7.22	9.17	1.95	18.5
ILMN_1806907	PAWR	PRKC, apoptosis, WT1, regulator (PAWR), mRNA.	NM_002583.2	10.65	11.89	1.24	18.49
ILMN_1693664	POMGNT1	protein O-linked mannose beta1,2-N-acetylglucosaminyltransferase (POMGNT1), mRNA.	NM_017739.2	8.65	10.13	1.48	18.48
ILMN_1809433	XBP1	X-box binding protein 1 (XBP1), transcript variant 1, mRNA.	NM_005080.2	10.15	11.85	1.7	18.46
ILMN_1773865	HSPA5	heat shock 70kDa protein 5 (glucose-regulated protein, 78kDa) (HSPA5), mRNA.	NM_005347.2	8.81	10.46	1.66	18.46
ILMN_2374865	ATF3	activating transcription factor 3 (ATF3), transcript variant 4, mRNA.	NM_001040619.1	7.37	9.88	2.5	18.45
ILMN_1797728	HMGCS1	3-hydroxy-3-methylglutaryl-Coenzyme A synthase 1 (soluble) (HMGCS1), transcript variant 2, mRNA.	NM_002130.6	9.92	12.01	2.1	18.37
ILMN_1764201	MAP2	microtubule-associated protein 2 (MAP2), transcript variant 2, mRNA.	NM_031845.2	7.35	9.16	1.81	18.3
ILMN_1756784	FREQ	frequenin homolog (Drosophila) (FREQ), mRNA.	NM_014286.2	8.43	10.04	1.61	18.25
ILMN_2203896	SMAD7	SMAD family member 7 (SMAD7), mRNA.	NM_005904.2	7.74	9.83	2.08	18.22
ILMN_1755281	FBXO15	F-box protein 15 (FBXO15), mRNA.	NM_152676.1	8.23	6.55	-1.68	18.21
ILMN_1689378	CCRN4L	CCR4 carbon catabolite repression 4-like (S. cerevisiae) (CCRN4L), mRNA.	NM_012118.2	6.4	8.64	2.24	18.18
ILMN_1737314	BCL6	B-cell CLL/lymphoma 6 (zinc finger protein 51) (BCL6), transcript variant 1, mRNA.	NM_001706.2	10.67	9.15	-1.52	18.17
ILMN_1704418	FOXD1	forkhead box D1 (FOXD1), mRNA.	NM_004472.2	9.41	10.95	1.54	18.14
ILMN_1786065	UHRF1	ubiquitin-like, containing PHD and RING finger domains, 1 (UHRF1), transcript variant 1, mRNA.	NM_001048201.1	10.04	8.54	-1.49	18.1
ILMN_2198878	INPP4B	inositol polyphosphate-4-phosphatase, type II, 105kDa (INPP4B), mRNA.	NM_003866.1	9.21	10.85	1.64	18.1
ILMN_1774336	POLE2	polymerase (DNA directed), epsilon 2 (p59 subunit) (POLE2), mRNA.	NM_002692.2	9.21	7.64	-1.57	18.04
ILMN_1798841	PLCXD3	phosphatidylinositol-specific phospholipase C, X domain containing 3 (PLCXD3), mRNA.	NM_001005473.1	8.09	5.97	-2.12	17.99
ILMN_1671295	CCDC3	coiled-coil domain containing 3 (CCDC3), mRNA.	NM_031455.2	6.07	7.57	1.5	17.89
ILMN_2148193	MPPED2	metallophosphoesterase domain containing 2 (MPPED2), mRNA.	NM_001584.1	9.61	7	-2.61	17.87
ILMN_1801105	PRKCD	protein kinase C, delta (PRKCD), transcript variant 1, mRNA.	NM_006254.3	10.76	9.23	-1.52	17.81
ILMN_1778321	SLC2A6	solute carrier family 2 (facilitated glucose transporter), member 6 (SLC2A6), mRNA.	NM_017585.2	8.63	10.27	1.64	17.72
ILMN_1719543	MAF	v-maf musculoaponeurotic fibrosarcoma oncogene homolog (avian) (MAF), transcript variant 1, mRNA.	NM_005360.3	9.67	11.27	1.6	17.71
ILMN_1683598	ACSL4	acyl-CoA synthetase long-chain family member 4 (ACSL4), transcript variant 1, mRNA.	NM_004458.1	8.42	10.33	1.91	17.71
ILMN_1789627	40061	septin 5 (SEPT5), mRNA.	NM_002688.4	9.21	10.7	1.49	17.7
ILMN_2373728	ASB9	ankyrin repeat and SOCS box-containing 9 (ASB9), transcript variant 2, mRNA.	NM_024087.1	8.82	7.06	-1.75	17.65
ILMN_1770612	KRT15	keratin 15 (KRT15), mRNA.	NM_002275.2	14.6	12.47	-2.13	17.63
ILMN_1803367	EVI1	ecotropic viral integration site 1 (EVI1), mRNA.	NM_005241.1	11.24	9.96	-1.28	17.62
ILMN_1699489	TUBB6	PREDICTED: tubulin, beta 6 (TUBB6), mRNA.	XM_940079.1	8.84	10.15	1.3	17.55
ILMN_1804662	NRG4	neuregulin 4 (NRG4), mRNA.	NM_138573.2	10.26	8.81	-1.45	17.54
ILMN_2376723	CDKN2B	cyclin-dependent kinase inhibitor 2B (p15, inhibits CDK4) (CDKN2B), transcript variant 2, mRNA.	NM_078487.2	10.8	12.4	1.6	17.5
ILMN_1717639	SNF1LK	SNF1-like kinase (SNF1LK), mRNA.	NM_173354.3	7.9	9.56	1.66	17.5
ILMN_2219466	APOBEC3B	apolipoprotein B mRNA editing enzyme, catalytic polypeptide-like 3B (APOBEC3B), mRNA.	NM_004900.3	10.54	8.76	-1.79	17.48
ILMN_1806040	TYMS	thymidylate synthetase (TYMS), mRNA.	NM_001071.1	9.95	8.18	-1.77	17.47
ILMN_2357134	SPHK1	sphingosine kinase 1 (SPHK1), transcript variant 1, mRNA.	NM_021972.2	6.65	8.29	1.64	17.41
ILMN_2327860	MAL	mal, T-cell differentiation protein (MAL), transcript variant d, mRNA.	NM_022440.1	12.77	10.21	-2.56	17.4
ILMN_1703855	SERPINB3	serpin peptidase inhibitor, clade B (ovalbumin), member 3 (SERPINB3), mRNA.	NM_006919.1	8.15	6.15	-1.99	17.34
ILMN_1785095	ATP6V0E2	ATPase, H+ transporting V0 subunit e2 (ATP6V0E2), transcript variant 1, mRNA.	NM_145230.2	11.27	9.85	-1.42	17.33
ILMN_2199389	VIPR1	vasoactive intestinal peptide receptor 1 (VIPR1), mRNA.	NM_004624.2	9.84	11.5	1.66	17.32
ILMN_1735347	MCEE	methylmalonyl CoA epimerase (MCEE), mRNA.	NM_032601.2	10.4	9.32	-1.07	17.29
ILMN_1778240	GFOD1	glucose-fructose oxidoreductase domain containing 1 (GFOD1), mRNA.	NM_018988.2	9.09	10.67	1.58	17.26
ILMN_1738578	FILIP1L	filamin A interacting protein 1-like (FILIP1L), transcript variant 2, mRNA.	NM_014890.2	8.01	9.89	1.88	17.24
ILMN_2336094	ODZ3	odz, odd Oz/ten-m homolog 3 (Drosophila) (ODZ3), mRNA.	NM_001080477.1	9.04	10.86	1.81	17.24
ILMN_1730294	C18orf37	chromosome 18 open reading frame 37 (C18orf37), transcript variant 2, mRNA.	NM_194281.3	9.8	11.23	1.44	17.22
ILMN_1741566	BMP7	bone morphogenetic protein 7 (osteogenic protein 1) (BMP7), mRNA.	NM_001719.1	11.35	9.52	-1.84	17.21
ILMN_1856480		cDNA clone IMAGE:5263177		10.68	9.07	-1.61	17.21
ILMN_1840316		cDNA clone IMAGE:6186815, partial cds		9.75	8.42	-1.33	17.11
ILMN_1666392	WNT4	wingless-type MMTV integration site family, member 4 (WNT4), mRNA.	NM_030761.3	7.8	9.63	1.83	17.08
ILMN_2398159	DKK3	dickkopf homolog 3 (Xenopus laevis) (DKK3), transcript variant 2, mRNA.	NM_013253.4	11.88	13.21	1.33	17.06
ILMN_2345142	SULF2	sulfatase 2 (SULF2), transcript variant 1, mRNA.	NM_018837.2	10.26	11.42	1.17	17.06
ILMN_2412384	CCNE2	cyclin E2 (CCNE2), transcript variant 2, mRNA.	NM_057735.1	8.2	6.14	-2.07	17.01
ILMN_2384056	GPER	G protein-coupled estrogen receptor 1 (GPER), transcript variant 3, mRNA.	NM_001039966.1	8.65	6.78	-1.87	17.01
ILMN_1669819	LOC402569	PREDICTED: similar to importin alpha 1b (LOC402569), misc RNA.	XR_015714.1	6.38	8.04	1.66	17.01
ILMN_1699989	BNIPL	BCL2/adenovirus E1B 19kD interacting protein like (BNIPL), mRNA.	NM_138278.2	10.04	8.15	-1.88	16.99
ILMN_1778575	WNT7A	wingless-type MMTV integration site family, member 7A (WNT7A), mRNA.	NM_004625.3	8.33	9.9	1.57	16.99
ILMN_1660794	LBH	PREDICTED: hypothetical protein DKFZp566J091 (LBH), mRNA.	XM_001132517.1	6.37	8.06	1.69	16.97
ILMN_1707695	IFIT1	interferon-induced protein with tetratricopeptide repeats 1 (IFIT1), transcript variant 2, mRNA.	NM_001548.3	9.52	7.5	-2.02	16.94
ILMN_1812926	ANTXR2	anthrax toxin receptor 2 (ANTXR2), mRNA.	NM_058172.3	7.38	9.13	1.76	16.93
ILMN_2393243	GTPBP8	GTP-binding protein 8 (putative) (GTPBP8), transcript variant 1, mRNA.	NM_014170.2	9.95	8.55	-1.39	16.88
ILMN_2098616	C5orf39	chromosome 5 open reading frame 39 (C5orf39), mRNA.	NM_001014279.1	8.64	7.25	-1.39	16.85
ILMN_1782050	CEBPD	CCAAT/enhancer binding protein (C/EBP), delta (CEBPD), mRNA.	NM_005195.3	10.23	8.96	-1.27	16.81
ILMN_1786470	C1orf74	chromosome 1 open reading frame 74 (C1orf74), mRNA.	NM_152485.2	8.38	9.62	1.24	16.8
ILMN_1799589	NOXA1	NADPH oxidase activator 1 (NOXA1), mRNA.	NM_006647.1	8.92	7.2	-1.72	16.79
ILMN_1675616	C12orf54	chromosome 12 open reading frame 54 (C12orf54), mRNA.	NM_152319.2	6.53	8.23	1.7	16.79
ILMN_1732150	KIAA0101	KIAA0101 (KIAA0101), transcript variant 2, mRNA.	NM_001029989.1	8.41	6.51	-1.9	16.77
ILMN_1808220	LCE3E	late cornified envelope 3E (LCE3E), mRNA.	NM_178435.2	5.84	7.45	1.61	16.76
ILMN_1793950	P704P	PREDICTED: prostate-specific P704P (P704P), mRNA.	XM_926231.1	7.7	9.34	1.64	16.76
ILMN_2134130	FLG	filaggrin (FLG), mRNA.	NM_002016.1	10.13	8.23	-1.9	16.67
ILMN_2054297	PTGS2	prostaglandin-endoperoxide synthase 2 (prostaglandin G/H synthase and cyclooxygenase) (PTGS2), mRNA.	NM_000963.1	7.99	9.75	1.75	16.65
ILMN_1741159	MAP3K8	mitogen-activated protein kinase kinase kinase 8 (MAP3K8), mRNA.	NM_005204.2	9.38	7.59	-1.79	16.59
ILMN_1673899	FAM57A	family with sequence similarity 57, member A (FAM57A), mRNA.	NM_024792.1	10.2	11.34	1.14	16.59
ILMN_2157240	MNS1	meiosis-specific nuclear structural 1 (MNS1), mRNA.	NM_018365.1	8.94	7.5	-1.45	16.47
ILMN_1702858	ADHFE1	alcohol dehydrogenase, iron containing, 1 (ADHFE1), mRNA.	NM_144650.2	9.15	7.81	-1.34	16.47
ILMN_1784602	CDKN1A	cyclin-dependent kinase inhibitor 1A (p21, Cip1) (CDKN1A), transcript variant 1, mRNA.	NM_000389.2	11.77	12.99	1.22	16.45
ILMN_2230683	CDCA7L	cell division cycle associated 7-like (CDCA7L), mRNA.	NM_018719.2	8.73	6.92	-1.81	16.43
ILMN_1815673	DKK3	dickkopf homolog 3 (Xenopus laevis) (DKK3), transcript variant 1, mRNA.	NM_015881.5	11.21	12.62	1.41	16.43
ILMN_1796335	LPCAT2	lysophosphatidylcholine acyltransferase 2 (LPCAT2), mRNA.	NM_017839.3	9.65	11.18	1.54	16.43
ILMN_1771800	PRKCA	protein kinase C, alpha (PRKCA), mRNA.	NM_002737.2	6.83	8.28	1.45	16.43
ILMN_1671557	PHLDA2	pleckstrin homology-like domain, family A, member 2 (PHLDA2), mRNA.	NM_003311.3	7.66	9.09	1.43	16.39
ILMN_2388484	MAP2	microtubule-associated protein 2 (MAP2), transcript variant 1, mRNA.	NM_002374.3	7.3	9.13	1.83	16.38
ILMN_1680996	ALOX5	PREDICTED: arachidonate 5-lipoxygenase (ALOX5), mRNA.	XM_001127464.1	6.74	8.31	1.57	16.36
ILMN_1739428	IFIT2	interferon-induced protein with tetratricopeptide repeats 2 (IFIT2), mRNA.	NM_001547.4	9.73	7.84	-1.89	16.35
ILMN_1777513	KCTD11	potassium channel tetramerisation domain containing 11 (KCTD11), mRNA.	NM_001002914.2	8.33	9.91	1.58	16.29
ILMN_1803593	WNT3	wingless-type MMTV integration site family, member 3 (WNT3), mRNA.	NM_030753.3	8.99	10.67	1.69	16.29
ILMN_1804735	CBS	cystathionine-beta-synthase (CBS), mRNA.	NM_000071.1	8.42	9.79	1.37	16.28
ILMN_1777740	C8orf55	chromosome 8 open reading frame 55 (C8orf55), mRNA.	NM_016647.2	12.1	10.59	-1.52	16.27
ILMN_1702503	ALDH3A1	aldehyde dehydrogenase 3 family, memberA1 (ALDH3A1), mRNA.	NM_000691.3	13.3	11.78	-1.52	16.26
ILMN_1730906	FILIP1L	filamin A interacting protein 1-like (FILIP1L), transcript variant 1, mRNA.	NM_182909.2	8.1	9.75	1.65	16.26
ILMN_1784300	TUBA4A	tubulin, alpha 4a (TUBA4A), mRNA.	NM_006000.1	11.72	13.01	1.3	16.26
ILMN_2324002	CALD1	caldesmon 1 (CALD1), transcript variant 3, mRNA.	NM_033157.2	7.23	9.33	2.1	16.24
ILMN_1737406	KLF6	Kruppel-like factor 6 (KLF6), transcript variant 1, mRNA.	NM_001008490.1	9.51	10.88	1.37	16.23
ILMN_1701918	KLHDC9	kelch domain containing 9 (KLHDC9), transcript variant 3, mRNA.	NM_001007256.1	9.5	8.05	-1.45	16.2
ILMN_1803236	CLCA2	chloride channel, calcium activated, family member 2 (CLCA2), mRNA.	NM_006536.4	10.33	8.34	-1.99	16.17
ILMN_2326509	CASP1	caspase 1, apoptosis-related cysteine peptidase (interleukin 1, beta, convertase) (CASP1), transcript variant delta, mRNA.	NM_033294.2	9.25	7.55	-1.71	16.11
ILMN_1668411	FHL2	four and a half LIM domains 2 (FHL2), transcript variant 4, mRNA.	NM_201557.2	10.98	12.12	1.14	16.1
ILMN_1770850	PNMA1	paraneoplastic antigen MA1 (PNMA1), mRNA.	NM_006029.4	7.97	9.72	1.74	16.08
ILMN_1709237	EPHX2	epoxide hydrolase 2, cytoplasmic (EPHX2), mRNA.	NM_001979.4	8.92	7.16	-1.76	16.05
ILMN_1778136	ZMYND15	zinc finger, MYND-type containing 15 (ZMYND15), mRNA.	NM_032265.1	8.13	6.83	-1.3	16.03
ILMN_1796074	C18orf56	chromosome 18 open reading frame 56 (C18orf56), mRNA.	NM_001012716.1	8.68	7.32	-1.36	16
ILMN_1723198	CDKN2B	cyclin-dependent kinase inhibitor 2B (p15, inhibits CDK4) (CDKN2B), transcript variant 1, mRNA.	NM_004936.3	9.48	11.18	1.7	15.99
ILMN_1801068	DACT1	dapper, antagonist of beta-catenin, homolog 1 (Xenopus laevis) (DACT1), mRNA.	NM_016651.4	5.95	7.7	1.75	15.99
ILMN_2224143	MCM3	minichromosome maintenance complex component 3 (MCM3), mRNA.	NM_002388.3	12.53	11.32	-1.21	15.97
ILMN_2044453	LPAR5	lysophosphatidic acid receptor 5 (LPAR5), mRNA.	NM_020400.4	9.57	10.81	1.24	15.97
ILMN_1656904	SLC1A4	solute carrier family 1 (glutamate/neutral amino acid transporter), member 4 (SLC1A4), mRNA.	NM_003038.2	7.67	9.05	1.38	15.97
ILMN_1661589	CD151	CD151 molecule (Raph blood group) (CD151), transcript variant 4, mRNA.	NM_139029.1	9.83	11.25	1.42	15.96
ILMN_2366463	FN1	fibronectin 1 (FN1), transcript variant 6, mRNA.	NM_212474.1	6.06	7.6	1.54	15.96
ILMN_2160929	FEN1	flap structure-specific endonuclease 1 (FEN1), mRNA.	NM_004111.4	11.69	10.51	-1.18	15.95
ILMN_1753101	VTCN1	V-set domain containing T cell activation inhibitor 1 (VTCN1), mRNA.	NM_024626.2	7.32	5.97	-1.35	15.94
ILMN_1653026	PLAC8	placenta-specific 8 (PLAC8), mRNA.	NM_016619.1	8.89	7.21	-1.68	15.88
ILMN_1803338	CCDC80	coiled-coil domain containing 80 (CCDC80), transcript variant 1, mRNA.	NM_199511.1	7.74	6.23	-1.52	15.88
ILMN_2043079	ILDR1	immunoglobulin-like domain containing receptor 1 (ILDR1), mRNA.	NM_175924.2	8	6.34	-1.67	15.88
ILMN_1658318	LOC120376	PREDICTED: hypothetical protein LOC120376 (LOC120376), mRNA.	XM_943506.2	7.35	5.87	-1.48	15.88
ILMN_2115434	RAB32	RAB32, member RAS oncogene family (RAB32), mRNA.	NM_006834.2	9.83	11.27	1.44	15.86
ILMN_1796455	RYR3	ryanodine receptor 3 (RYR3), mRNA.	NM_001036.2	5.85	7.14	1.29	15.85
ILMN_1698732	PALLD	palladin, cytoskeletal associated protein (PALLD), mRNA.	NM_016081.3	10.3	11.61	1.3	15.84
ILMN_1778237	FN1	fibronectin 1 (FN1), transcript variant 3, mRNA.	NM_002026.2	5.91	7.48	1.57	15.78
ILMN_2077905	PTGFRN	prostaglandin F2 receptor negative regulator (PTGFRN), mRNA.	NM_020440.2	7.58	9.75	2.16	15.78
ILMN_2132599	ANKRD22	ankyrin repeat domain 22 (ANKRD22), mRNA.	NM_144590.1	7.86	5.89	-1.96	15.74
ILMN_1684554	COL16A1	collagen, type XVI, alpha 1 (COL16A1), mRNA.	NM_001856.3	9.47	10.72	1.26	15.73
ILMN_1724832	OVOL2	ovo-like 2 (Drosophila) (OVOL2), mRNA.	NM_021220.2	11.51	10.49	-1.02	15.66
ILMN_1788462	AMD1	adenosylmethionine decarboxylase 1 (AMD1), transcript variant 2, mRNA.	NM_001033059.1	9.09	10.42	1.33	15.65
ILMN_1732609	KIAA1539	KIAA1539 (KIAA1539), mRNA.	NM_025182.2	7.11	8.93	1.82	15.62
ILMN_1736760	KRT16	keratin 16 (focal non-epidermolytic palmoplantar keratoderma) (KRT16), mRNA.	NM_005557.2	9.72	11.35	1.63	15.62
ILMN_1694502	PRIM1	primase, DNA, polypeptide 1 (49kDa) (PRIM1), mRNA.	NM_000946.2	9.06	7.66	-1.4	15.61
ILMN_1772521	MTHFD1L	methylenetetrahydrofolate dehydrogenase (NADP+ dependent) 1-like (MTHFD1L), mRNA.	NM_015440.3	9.15	10.58	1.43	15.59
ILMN_2052208	GADD45A	growth arrest and DNA-damage-inducible, alpha (GADD45A), mRNA.	NM_001924.2	10.46	11.64	1.18	15.5
ILMN_2153837	SCNN1G	sodium channel, nonvoltage-gated 1, gamma (SCNN1G), mRNA.	NM_001039.2	7.38	5.96	-1.42	15.48
ILMN_2391150	FILIP1L	filamin A interacting protein 1-like (FILIP1L), transcript variant 3, mRNA.	NM_001042459.1	7.21	8.69	1.48	15.47
ILMN_2129572	F3	coagulation factor III (thromboplastin, tissue factor) (F3), mRNA.	NM_001993.2	10.78	12.2	1.42	15.42
ILMN_1724040	ANKRD57	ankyrin repeat domain 57 (ANKRD57), mRNA.	NM_023016.3	10.93	12.08	1.15	15.37
ILMN_1756953	GBP6	guanylate binding protein family, member 6 (GBP6), mRNA.	NM_198460.1	9.66	8.11	-1.56	15.33
ILMN_1785699	PTHLH	parathyroid hormone-like hormone (PTHLH), transcript variant 3, mRNA.	NM_198964.1	11.91	13.03	1.12	15.32
ILMN_1774077	GBP2	guanylate binding protein 2, interferon-inducible (GBP2), mRNA.	NM_004120.3	9.81	7.99	-1.82	15.3
ILMN_1786823	ICAM2	intercellular adhesion molecule 2 (ICAM2), transcript variant 1, mRNA.	NM_001099786.1	7.58	9.11	1.53	15.3
ILMN_1798543	STK17B	serine/threonine kinase 17b (STK17B), mRNA.	NM_004226.2	6.27	7.83	1.56	15.27
ILMN_1670672	TMEM37	transmembrane protein 37 (TMEM37), mRNA.	NM_183240.2	7.63	6.08	-1.55	15.24
ILMN_1806818	MCM3	minichromosome maintenance complex component 3 (MCM3), mRNA.	NM_002388.3	9.84	8.4	-1.44	15.22
ILMN_1740415	WFDC3	WAP four-disulfide core domain 3 (WFDC3), mRNA.	NM_080614.1	8.43	6.37	-2.06	15.16
ILMN_2232177	ACTN1	actinin, alpha 1 (ACTN1), mRNA.	NM_001102.2	11.41	12.98	1.57	15.14
ILMN_1801504	RUNX1	runt-related transcription factor 1 (acute myeloid leukemia 1; aml1 oncogene) (RUNX1), transcript variant 1, mRNA.	NM_001754.3	10.15	11.4	1.25	15.12
ILMN_2328029	EXT2	exostoses (multiple) 2 (EXT2), transcript variant 2, mRNA.	NM_207122.1	9.09	10.33	1.24	15.12
ILMN_2286514	GTPBP8	GTP-binding protein 8 (putative) (GTPBP8), transcript variant 1, mRNA.	NM_014170.2	10.92	9.55	-1.37	15.08
ILMN_2184612	C3orf52	chromosome 3 open reading frame 52 (C3orf52), mRNA.	NM_024616.1	8.13	9.62	1.48	15.08
ILMN_1753111	NAMPT	nicotinamide phosphoribosyltransferase (NAMPT), mRNA.	NM_005746.2	8.18	9.39	1.21	15.05
ILMN_1772241	SQLE	squalene epoxidase (SQLE), mRNA.	NM_003129.3	7.91	9.46	1.55	15.03
ILMN_1699631	GATS	opposite strand transcription unit to STAG3 (GATS), mRNA.	NM_178831.4	10.77	9.3	-1.47	14.98
ILMN_1737146	TRAM1	translocation associated membrane protein 1 (TRAM1), mRNA.	NM_014294.4	12.48	13.5	1.02	14.97
ILMN_2228162	KRT16	keratin 16 (focal non-epidermolytic palmoplantar keratoderma) (KRT16), mRNA.	NM_005557.2	10.73	12.69	1.96	14.93
ILMN_2077680	CLDND2	claudin domain containing 2 (CLDND2), mRNA.	NM_152353.1	8.41	7.04	-1.37	14.91
ILMN_1801442	KRT81	keratin 81 (KRT81), mRNA.	NM_002281.2	7.15	8.94	1.78	14.91
ILMN_1726547	MAP3K5	mitogen-activated protein kinase kinase kinase 5 (MAP3K5), mRNA.	NM_005923.3	8.35	6.91	-1.45	14.84
ILMN_1691071	FCRLA	Fc receptor-like A (FCRLA), mRNA.	NM_032738.3	5.77	7.15	1.38	14.84
ILMN_1663035	SREBF1	sterol regulatory element binding transcription factor 1 (SREBF1), transcript variant 1, mRNA.	NM_001005291.1	11.45	10.36	-1.09	14.79
ILMN_1798372	ANXA2P3	annexin A2 pseudogene 3 (ANXA2P3) on chromosome 10.	NR_001446.2	8.13	9.61	1.48	14.79
ILMN_1754272	GINS3	GINS complex subunit 3 (Psf3 homolog) (GINS3), mRNA.	NM_022770.2	9.57	8.45	-1.12	14.76
ILMN_1651964	ABCC5	ATP-binding cassette, sub-family C (CFTR/MRP), member 5 (ABCC5), transcript variant 2, mRNA.	NM_001023587.1	11.39	10.02	-1.37	14.75
ILMN_1767934	PCSK5	proprotein convertase subtilisin/kexin type 5 (PCSK5), mRNA.	NM_006200.2	11.66	10.39	-1.26	14.72
ILMN_1807894	SLC7A8	solute carrier family 7 (cationic amino acid transporter, y+ system), member 8 (SLC7A8), transcript variant 2, mRNA.	NM_182728.1	7.99	9.57	1.58	14.72
ILMN_1689004	TNFRSF12A	tumor necrosis factor receptor superfamily, member 12A (TNFRSF12A), mRNA.	NM_016639.1	10.24	12.02	1.78	14.72
ILMN_1687556	DAPL1	death associated protein-like 1 (DAPL1), mRNA.	NM_001017920.1	7.49	5.82	-1.67	14.71
ILMN_1787718	SLC27A1	solute carrier family 27 (fatty acid transporter), member 1 (SLC27A1), mRNA.	NM_198580.1	9.06	7.61	-1.45	14.71
ILMN_1686981	SULF2	sulfatase 2 (SULF2), transcript variant 1, mRNA.	NM_018837.2	8.56	10.23	1.67	14.71
ILMN_1741003	ANXA5	annexin A5 (ANXA5), mRNA.	NM_001154.2	11.04	12.15	1.11	14.71
ILMN_1786197	NR2F1	nuclear receptor subfamily 2, group F, member 1 (NR2F1), mRNA.	NM_005654.4	9.26	7.77	-1.5	14.7
ILMN_2148796	MND1	meiotic nuclear divisions 1 homolog (S. cerevisiae) (MND1), mRNA.	NM_032117.2	7.84	6.6	-1.23	14.67
ILMN_1809695	CAMK2G	calcium/calmodulin-dependent protein kinase (CaM kinase) II gamma (CAMK2G), transcript variant 4, mRNA.	NM_001222.2	10.45	9.41	-1.04	14.66
ILMN_1695397	LOC644151	PREDICTED: similar to calpain 8 (LOC644151), mRNA.	XM_927359.1	8.85	7.52	-1.34	14.65
ILMN_1727135	FIBCD1	fibrinogen C domain containing 1 (FIBCD1), mRNA.	NM_032843.3	7.72	9.03	1.31	14.64
ILMN_1791792	C12orf5	chromosome 12 open reading frame 5 (C12orf5), mRNA.	NM_020375.2	8.27	9.73	1.46	14.63
ILMN_1801307	TNFSF10	tumor necrosis factor (ligand) superfamily, member 10 (TNFSF10), mRNA.	NM_003810.2	12.58	10.69	-1.89	14.62
ILMN_1747934	ISYNA1	myo-inositol 1-phosphate synthase A1 (ISYNA1), mRNA.	NM_016368.3	9.1	7.62	-1.48	14.59
ILMN_1810000	RDH16	retinol dehydrogenase 16 (all-trans) (RDH16), mRNA.	NM_003708.3	7.43	9.26	1.83	14.59
ILMN_1725852	S100A2	S100 calcium binding protein A2 (S100A2), mRNA.	NM_005978.3	11.26	12.73	1.47	14.59
ILMN_1730777	KRT19	keratin 19 (KRT19), mRNA.	NM_002276.3	14.14	12.83	-1.31	14.58
ILMN_1656910	TRIM6	tripartite motif-containing 6 (TRIM6), transcript variant 2, mRNA.	NM_058166.3	9.02	7.54	-1.47	14.57
ILMN_1787378	ADD3	adducin 3 (gamma) (ADD3), transcript variant 1, mRNA.	NM_016824.3	7.89	6.57	-1.32	14.57
ILMN_1735093	TIMELESS	timeless homolog (Drosophila) (TIMELESS), mRNA.	NM_003920.2	9.73	8.66	-1.06	14.56
ILMN_1809566	ZSCAN16	zinc finger and SCAN domain containing 16 (ZSCAN16), mRNA.	NM_025231.1	8.54	7.28	-1.26	14.56
ILMN_1673363	CD97	CD97 molecule (CD97), transcript variant 1, mRNA.	NM_078481.2	9.82	8.62	-1.2	14.54
ILMN_1749398	WFDC11	WAP four-disulfide core domain 11 (WFDC11), mRNA.	NM_147197.2	7.15	5.74	-1.41	14.53
ILMN_1726327	AMY1B	amylase, alpha 1B (salivary) (AMY1B), mRNA.	NM_001008218.1	7.51	9.25	1.73	14.51
ILMN_1663195	MCM7	minichromosome maintenance complex component 7 (MCM7), transcript variant 2, mRNA.	NM_182776.1	12.55	11.51	-1.04	14.49
ILMN_1689431	APCDD1L	adenomatosis polyposis coli down-regulated 1-like (APCDD1L), mRNA.	NM_153360.1	8.37	9.93	1.55	14.49
ILMN_2216157	GNA12	guanine nucleotide binding protein (G protein) alpha 12 (GNA12), mRNA.	NM_007353.2	7.94	8.87	0.92	14.47
ILMN_1814282	ISG20L1	interferon stimulated exonuclease gene 20kDa-like 1 (ISG20L1), mRNA.	NM_022767.2	7.68	9.2	1.52	14.45
ILMN_2400935	TAGLN	transgelin (TAGLN), transcript variant 2, mRNA.	NM_003186.3	6.64	8.56	1.92	14.44
ILMN_1682139	RAI14	retinoic acid induced 14 (RAI14), mRNA.	NM_015577.1	8.54	9.74	1.21	14.44
ILMN_1723418	CEL	carboxyl ester lipase (bile salt-stimulated lipase) (CEL), mRNA.	NM_001807.3	9.22	7.73	-1.5	14.42
ILMN_1710676	FBXO5	F-box protein 5 (FBXO5), mRNA.	NM_012177.2	9.03	7.87	-1.15	14.42
ILMN_1655930	ELL2	elongation factor, RNA polymerase II, 2 (ELL2), mRNA.	NM_012081.4	8.91	10.27	1.36	14.42
ILMN_1789846	ITGB6	integrin, beta 6 (ITGB6), mRNA.	NM_000888.3	5.91	7.64	1.73	14.41
ILMN_1775380	SMOX	spermine oxidase (SMOX), transcript variant 4, mRNA.	NM_175842.1	8.7	9.75	1.06	14.41
ILMN_1668345	OAF	OAF homolog (Drosophila) (OAF), mRNA.	NM_178507.2	9.21	7.87	-1.34	14.4
ILMN_2396020	DUSP6	dual specificity phosphatase 6 (DUSP6), transcript variant 2, mRNA.	NM_022652.2	7.32	9.46	2.14	14.35
ILMN_1723706	GRAMD4	GRAM domain containing 4 (GRAMD4), mRNA.	NM_015124.2	9.06	7.9	-1.16	14.31
ILMN_1667711	HRASLS3	HRAS-like suppressor 3 (HRASLS3), mRNA.	NM_007069.2	7.51	6.19	-1.33	14.3
ILMN_1746819	C5	complement component 5 (C5), mRNA.	NM_001735.2	10.38	9.14	-1.23	14.3
ILMN_2202423	HELLS	helicase, lymphoid-specific (HELLS), mRNA.	NM_018063.3	8.71	6.9	-1.81	14.29
ILMN_1715715	CEBPA	CCAAT/enhancer binding protein (C/EBP), alpha (CEBPA), mRNA.	NM_004364.2	9.12	7.66	-1.46	14.27
ILMN_1731783	ATP1A1	ATPase, Na+/K+ transporting, alpha 1 polypeptide (ATP1A1), transcript variant 1, mRNA.	NM_000701.6	11.75	10.43	-1.32	14.25
ILMN_1763461	ALDH7A1	aldehyde dehydrogenase 7 family, member A1 (ALDH7A1), mRNA.	NM_001182.2	12.03	10.86	-1.17	14.22
ILMN_1669273	PPT1	palmitoyl-protein thioesterase 1 (ceroid-lipofuscinosis, neuronal 1, infantile) (PPT1), mRNA.	NM_000310.2	12.67	11.45	-1.22	14.18
ILMN_2348975	NASP	nuclear autoantigenic sperm protein (histone-binding) (NASP), transcript variant 2, mRNA.	NM_002482.2	8.95	7.75	-1.2	14.15
ILMN_1852343		cDNA FLJ33551 fis, clone BRAMY2009105		7.49	6.18	-1.31	14.15
ILMN_1749875	LOC728715	PREDICTED: similar to hCG38149 (LOC728715), mRNA.	XM_001128260.1	8.47	6.97	-1.49	14.11
ILMN_1684306	S100A4	S100 calcium binding protein A4 (S100A4), transcript variant 2, mRNA.	NM_019554.2	12.2	10.57	-1.62	14.07
ILMN_1797704	LOC729252	PREDICTED: similar to Keratin, type I cytoskeletal 14 (Cytokeratin-14) (CK-14) (Keratin-14) (K14) (LOC729252), mRNA.	XR_015937.1	9.53	11.1	1.57	14.07
ILMN_1690170	CRABP2	cellular retinoic acid binding protein 2 (CRABP2), mRNA.	NM_001878.2	10.6	9.3	-1.29	14.04
ILMN_1734190	TCEAL3	transcription elongation factor A (SII)-like 3 (TCEAL3), transcript variant 1, mRNA.	NM_001006933.1	11.47	12.66	1.2	14.03
ILMN_1683120	UNG	uracil-DNA glycosylase (UNG), transcript variant 1, mRNA.	NM_003362.2	11.01	9.87	-1.14	14.02
ILMN_1715133	IVNS1ABP	influenza virus NS1A binding protein (IVNS1ABP), transcript variant 2, mRNA.	NM_016389.2	6.56	8.16	1.6	14.02
ILMN_1695621	KRT3	keratin 3 (KRT3), mRNA.	NM_057088.2	8	6.89	-1.11	14.01
ILMN_1671486	HOMER2	homer homolog 2 (Drosophila) (HOMER2), transcript variant 3, mRNA.	NM_199331.2	7.56	8.87	1.31	13.98
ILMN_1746801	CGN	cingulin (CGN), mRNA.	NM_020770.1	10.6	9.48	-1.12	13.97
ILMN_1772821	KIAA1671	PREDICTED: KIAA1671 protein (KIAA1671), mRNA.	XM_371461.4	11.37	10.35	-1.02	13.97
ILMN_1727156	ARSI	arylsulfatase family, member I (ARSI), mRNA.	NM_001012301.1	8.2	6.63	-1.56	13.94
ILMN_2410038	FAM111A	family with sequence similarity 111, member A (FAM111A), transcript variant 1, mRNA.	NM_022074.2	10.96	9.9	-1.06	13.93
ILMN_1793474	INSIG1	insulin induced gene 1 (INSIG1), transcript variant 2, mRNA.	NM_198336.1	10.88	12	1.12	13.93
ILMN_1672102	PTPRB	protein tyrosine phosphatase, receptor type, B (PTPRB), mRNA.	NM_002837.2	7.84	9.09	1.26	13.92
ILMN_1777564	MAD2L1	MAD2 mitotic arrest deficient-like 1 (yeast) (MAD2L1), mRNA.	NM_002358.2	8.88	7.68	-1.2	13.91
ILMN_1788213	FRAT2	frequently rearranged in advanced T-cell lymphomas 2 (FRAT2), mRNA.	NM_012083.2	10.79	9.88	-0.91	13.91
ILMN_1694084	PSCD1	pleckstrin homology, Sec7 and coiled-coil domains 1(cytohesin 1) (PSCD1), transcript variant 2, mRNA.	NM_017456.1	10.71	11.72	1.02	13.91
ILMN_2390310	C17orf91	chromosome 17 open reading frame 91 (C17orf91), transcript variant 2, mRNA.	NM_001001870.1	10.9	12.14	1.24	13.88
ILMN_1706531	ABCC5	ATP-binding cassette, sub-family C (CFTR/MRP), member 5 (ABCC5), transcript variant 1, mRNA.	NM_005688.2	12.17	10.94	-1.23	13.86
ILMN_1769388	GJB2	gap junction protein, beta 2, 26kDa (GJB2), mRNA.	NM_004004.4	7.18	9.25	2.08	13.85
ILMN_1794598	SCHIP1	schwannomin interacting protein 1 (SCHIP1), mRNA.	NM_014575.2	9.07	10.23	1.16	13.84
ILMN_2376771	ATR	ataxia telangiectasia and Rad3 related (ATR), mRNA.	NM_001184.2	8.25	6.51	-1.74	13.8
ILMN_2404385	REPIN1	replication initiator 1 (REPIN1), transcript variant 2, mRNA.	NM_014374.1	12.17	10.98	-1.19	13.8
ILMN_2038777	ACTB	actin, beta (ACTB), mRNA.	NM_001101.2	12.42	13.57	1.16	13.79
ILMN_2396948	PSMC3IP	PSMC3 interacting protein (PSMC3IP), transcript variant 2, mRNA.	NM_016556.1	7.97	6.63	-1.33	13.78
ILMN_1672660	MBP	myelin basic protein (MBP), transcript variant 8, mRNA.	NM_001025100.1	12.27	11.21	-1.07	13.78
ILMN_1772286	OCIAD2	OCIA domain containing 2 (OCIAD2), transcript variant 2, mRNA.	NM_152398.2	10.14	11.19	1.06	13.78
ILMN_1678655	PNLIPRP3	pancreatic lipase-related protein 3 (PNLIPRP3), mRNA.	NM_001011709.1	8.37	6.84	-1.52	13.77
ILMN_1796737	APM-1	PREDICTED: BTB/POZ-zinc finger protein-like (APM-1), mRNA.	XM_113971.4	7.79	6.2	-1.59	13.75
ILMN_1691156	MT1A	metallothionein 1A (MT1A), mRNA.	NM_005946.2	13.8	12.78	-1.02	13.74
ILMN_1790537	C16orf75	chromosome 16 open reading frame 75 (C16orf75), mRNA.	NM_152308.1	9.79	8.61	-1.18	13.72
ILMN_1714167	CYB5A	cytochrome b5 type A (microsomal) (CYB5A), transcript variant 2, mRNA.	NM_001914.2	12	10.98	-1.02	13.72
ILMN_1727592	FRMD5	FERM domain containing 5 (FRMD5), transcript variant 2, mRNA.	NM_032892.2	7.18	8.65	1.47	13.7
ILMN_1900110		BX099724 Soares_fetal_liver_spleen_1NFLS_S1 cDNA clone IMAGp998F201004, mRNA sequence		6.42	7.84	1.42	13.7
ILMN_1718766	MT1F	metallothionein 1F (MT1F), mRNA.	NM_005949.2	11.98	10.96	-1.02	13.68
ILMN_1783285	CTPS	CTP synthase (CTPS), mRNA.	NM_001905.1	8.37	9.61	1.24	13.68
ILMN_1740291	POLQ	polymerase (DNA directed), theta (POLQ), mRNA.	NM_199420.3	9.01	7.57	-1.45	13.62
ILMN_1736834	SKIL	SKI-like oncogene (SKIL), mRNA.	NM_005414.2	6.4	8.14	1.74	13.62
ILMN_1794740	CD151	CD151 molecule (Raph blood group) (CD151), transcript variant 5, mRNA.	NM_001039490.1	8.18	9.71	1.53	13.62
ILMN_2294762	AMY1A	amylase, alpha 1A (salivary) (AMY1A), transcript variant 1, mRNA.	NM_004038.3	9.29	10.75	1.46	13.6
ILMN_1681249	KIF21A	kinesin family member 21A (KIF21A), mRNA.	NM_017641.2	7.83	9.58	1.75	13.59
ILMN_1703123	AXUD1	AXIN1 up-regulated 1 (AXUD1), mRNA.	NM_033027.2	8.78	9.84	1.06	13.56
ILMN_1779252	TRIM22	tripartite motif-containing 22 (TRIM22), mRNA.	NM_006074.3	8.2	6.63	-1.57	13.52
ILMN_1681248	TCHH	trichohyalin (TCHH), mRNA.	NM_007113.2	9.7	8.42	-1.28	13.48
ILMN_2313901	PAM	peptidylglycine alpha-amidating monooxygenase (PAM), transcript variant 3, mRNA.	NM_138821.1	10.51	11.55	1.05	13.48
ILMN_1689306	TMC7	transmembrane channel-like 7 (TMC7), mRNA.	NM_024847.2	8.15	9.4	1.25	13.46
ILMN_2089167	RHOD	ras homolog gene family, member D (RHOD), mRNA.	NM_014578.2	11.68	12.79	1.11	13.46
ILMN_1708340	DAPK1	death-associated protein kinase 1 (DAPK1), mRNA.	NM_004938.2	9.68	8.53	-1.15	13.43
ILMN_1735930	KLF2	Kruppel-like factor 2 (lung) (KLF2), mRNA.	NM_016270.2	7.8	9.27	1.47	13.43
ILMN_1728298	SBK1	SH3-binding domain kinase 1 (SBK1), mRNA.	NM_001024401.2	8.03	6.98	-1.05	13.41
ILMN_1823231		full-length cDNA clone CS0DM012YE14 of Fetal liver of (human)		6.4	7.77	1.37	13.39
ILMN_1714438	MUTYH	mutY homolog (E. coli) (MUTYH), transcript variant gamma2, mRNA.	NM_001048172.1	10.05	8.98	-1.06	13.38
ILMN_1714418	FAM101B	family with sequence similarity 101, member B (FAM101B), mRNA.	NM_182705.2	6.08	7.31	1.23	13.38
ILMN_1694106	GPD1L	glycerol-3-phosphate dehydrogenase 1-like (GPD1L), mRNA.	NM_015141.2	10.65	9.47	-1.18	13.37
ILMN_2101526	C7orf24	chromosome 7 open reading frame 24 (C7orf24), mRNA.	NM_024051.2	11.84	10.86	-0.98	13.34
ILMN_1691410	BAMBI	BMP and activin membrane-bound inhibitor homolog (Xenopus laevis) (BAMBI), mRNA.	NM_012342.2	7.54	9.59	2.05	13.34
ILMN_1737462	OXR1	oxidation resistance 1 (OXR1), mRNA.	NM_181354.3	11.31	10.27	-1.04	13.33
ILMN_1672536	FBLN1	fibulin 1 (FBLN1), transcript variant D, mRNA.	NM_006486.2	10.27	9.22	-1.04	13.33
ILMN_1715684	LAMB3	laminin, beta 3 (LAMB3), transcript variant 1, mRNA.	NM_000228.2	12.84	13.86	1.03	13.29
ILMN_2326512	CASP1	caspase 1, apoptosis-related cysteine peptidase (interleukin 1, beta, convertase) (CASP1), transcript variant delta, mRNA.	NM_033294.2	8.83	7.22	-1.62	13.28
ILMN_1755721	FAM63A	family with sequence similarity 63, member A (FAM63A), transcript variant 1, mRNA.	NM_018379.3	7.27	5.94	-1.32	13.28
ILMN_1795930	PTGER4	prostaglandin E receptor 4 (subtype EP4) (PTGER4), mRNA.	NM_000958.2	6.91	8.16	1.25	13.23
ILMN_1815032	SOX7	SRY (sex determining region Y)-box 7 (SOX7), mRNA.	NM_031439.2	9.9	8.43	-1.46	13.22
ILMN_1814998	FKSG30	actin-like protein (FKSG30), mRNA.	NM_001017421.1	11.49	13.07	1.59	13.21
ILMN_1787815	TRIB3	tribbles homolog 3 (Drosophila) (TRIB3), mRNA.	NM_021158.3	10.44	11.54	1.1	13.19
ILMN_2188264	CYR61	cysteine-rich, angiogenic inducer, 61 (CYR61), mRNA.	NM_001554.3	7.59	10.38	2.79	13.17
ILMN_1796537	FYB	FYN binding protein (FYB-120/130) (FYB), transcript variant 1, mRNA.	NM_001465.3	11.64	9.62	-2.02	13.16
ILMN_2057479	EGFL6	EGF-like-domain, multiple 6 (EGFL6), mRNA.	NM_015507.2	7.48	6.02	-1.46	13.15
ILMN_1678669	RRM2	ribonucleotide reductase M2 polypeptide (RRM2), mRNA.	NM_001034.1	7.71	6.13	-1.58	13.13
ILMN_1777296	ACTB	actin, beta (ACTB), mRNA.	NM_001101.2	13.68	14.66	0.98	13.13
ILMN_1776490	C17orf53	chromosome 17 open reading frame 53 (C17orf53), mRNA.	NM_024032.2	9.66	8.45	-1.21	13.12
ILMN_1663640	MAOA	monoamine oxidase A (MAOA), nuclear gene encoding mitochondrial protein, mRNA.	NM_000240.2	11.63	10.32	-1.31	13.12
ILMN_1699022	ENDOD1	endonuclease domain containing 1 (ENDOD1), mRNA.	NM_015036.1	9.02	10.35	1.33	13.09
ILMN_1731070	ORC6L	origin recognition complex, subunit 6 like (yeast) (ORC6L), mRNA.	NM_014321.2	9.34	8.1	-1.24	13.08
ILMN_2308849	MYADM	myeloid-associated differentiation marker (MYADM), transcript variant 4, mRNA.	NM_001020820.1	10.75	12.03	1.28	13.07
ILMN_2193706	HRK	harakiri, BCL2 interacting protein (contains only BH3 domain) (HRK), mRNA.	NM_003806.1	8.76	7.22	-1.55	13.06
ILMN_1746013	SPOCK1	sparc/osteonectin, cwcv and kazal-like domains proteoglycan (testican) 1 (SPOCK1), mRNA.	NM_004598.3	7.73	9.16	1.43	13.06
ILMN_2137789	KLF4	Kruppel-like factor 4 (gut) (KLF4), mRNA.	NM_004235.3	7.68	8.85	1.17	13.05
ILMN_2388397	LYPD1	LY6/PLAUR domain containing 1 (LYPD1), transcript variant 2, mRNA.	NM_001077427.2	7.89	9.04	1.15	13.03
ILMN_2125346	MUC16	mucin 16, cell surface associated (MUC16), mRNA.	NM_024690.2	12.21	10.56	-1.65	13
ILMN_1711174	SPRR1B	small proline-rich protein 1B (cornifin) (SPRR1B), mRNA.	NM_003125.2	8.38	10.18	1.79	13
ILMN_2393046	NHLRC3	NHL repeat containing 3 (NHLRC3), transcript variant 2, mRNA.	NM_001017370.1	8.82	7.57	-1.25	12.99
ILMN_1814106	MGC59937	Similar to RIKEN cDNA 2310002J15 gene (MGC59937), mRNA.	NM_199001.1	11.42	10.12	-1.3	12.99
ILMN_1811579	HOMER3	homer homolog 3 (Drosophila) (HOMER3), mRNA.	NM_004838.2	9.24	10.27	1.03	12.99
ILMN_1747067	NPAS1	neuronal PAS domain protein 1 (NPAS1), mRNA.	NM_002517.2	7.76	6.47	-1.29	12.98
ILMN_2120072	FLJ13305	hypothetical protein FLJ13305 (FLJ13305), mRNA. XM_934538 XM_934541 XM_934544 XM_942148 XM_945748 XM_945749 XM_945750 XM_945751 XM_945752 XM_945754 XM_945756	NM_032180.1	8.92	7.41	-1.51	12.94
ILMN_1720513	SETBP1	SET binding protein 1 (SETBP1), mRNA.	NM_015559.1	8.71	9.72	1.01	12.91
ILMN_1781374	TUFT1	tuftelin 1 (TUFT1), mRNA.	NM_020127.1	11.05	12.09	1.03	12.91
ILMN_1697729	MAP2K6	mitogen-activated protein kinase kinase 6 (MAP2K6), mRNA.	NM_002758.3	6.96	5.75	-1.22	12.9
ILMN_1706015	FAM43A	family with sequence similarity 43, member A (FAM43A), mRNA.	NM_153690.4	9.41	8.1	-1.31	12.9
ILMN_1808999	ARHGEF19	Rho guanine nucleotide exchange factor (GEF) 19 (ARHGEF19), mRNA.	NM_153213.3	9.79	8.55	-1.24	12.87
ILMN_2063168	MALL	mal, T-cell differentiation protein-like (MALL), mRNA.	NM_005434.3	9.96	11.22	1.26	12.87
ILMN_1742461	UAP1	UDP-N-acteylglucosamine pyrophosphorylase 1 (UAP1), mRNA.	NM_003115.3	7.94	9.31	1.37	12.87
ILMN_2217601	ANXA9	annexin A9 (ANXA9), mRNA.	NM_003568.1	7.48	5.87	-1.61	12.86
ILMN_1667460	SULF2	sulfatase 2 (SULF2), transcript variant 1, mRNA.	NM_018837.2	9.84	10.94	1.11	12.85
ILMN_2135756	HSF2BP	heat shock transcription factor 2 binding protein (HSF2BP), mRNA.	NM_007031.1	7.34	8.54	1.19	12.83
ILMN_1739222	ETV5	ets variant gene 5 (ets-related molecule) (ETV5), mRNA.	NM_004454.1	6.27	7.65	1.38	12.83
ILMN_1706779	LIG1	ligase I, DNA, ATP-dependent (LIG1), mRNA.	NM_000234.1	8.83	7.62	-1.21	12.82
ILMN_1697703	HPDL	4-hydroxyphenylpyruvate dioxygenase-like (HPDL), mRNA.	NM_032756.2	7.09	5.94	-1.14	12.82
ILMN_1805466	SOX9	SRY (sex determining region Y)-box 9 (campomelic dysplasia, autosomal sex-reversal) (SOX9), mRNA.	NM_000346.2	8.41	10.31	1.9	12.82
ILMN_2343048	ABCB9	ATP-binding cassette, sub-family B (MDR/TAP), member 9 (ABCB9), transcript variant 2, mRNA.	NM_019624.2	9.9	8.85	-1.05	12.8
ILMN_1654112	PARD6A	par-6 partitioning defective 6 homolog alpha (C. elegans) (PARD6A), transcript variant 2, mRNA.	NM_001037281.1	8.37	6.92	-1.45	12.8
ILMN_1810604	ELMOD1	ELMO/CED-12 domain containing 1 (ELMOD1), mRNA.	NM_018712.2	6.25	7.39	1.15	12.8
ILMN_1717877	IVNS1ABP	influenza virus NS1A binding protein (IVNS1ABP), mRNA.	NM_006469.4	9.21	11.06	1.85	12.8
ILMN_1660698	GTPBP8	GTP-binding protein 8 (putative) (GTPBP8), transcript variant 1, mRNA.	NM_014170.2	9.45	8.15	-1.3	12.78
ILMN_1777853	MBOAT2	PREDICTED: membrane bound O-acyltransferase domain containing 2 (MBOAT2), mRNA.	XM_001129292.1	6.92	8.34	1.42	12.76
ILMN_1693338	CYP1B1	cytochrome P450, family 1, subfamily B, polypeptide 1 (CYP1B1), mRNA.	NM_000104.2	10.18	8.19	-1.98	12.73
ILMN_1701789	IFIT3	interferon-induced protein with tetratricopeptide repeats 3 (IFIT3), mRNA.	NM_001031683.1	9.69	7.75	-1.94	12.72
ILMN_2152131	ACTB	actin, beta (ACTB), mRNA.	NM_001101.2	13.55	14.43	0.87	12.72
ILMN_2401779	FAM102A	family with sequence similarity 102, member A (FAM102A), transcript variant 1, mRNA.	NM_001035254.1	10.67	9.64	-1.04	12.7
ILMN_1683682	DAGLA	diacylglycerol lipase, alpha (DAGLA), mRNA.	NM_006133.1	6.87	5.7	-1.17	12.69
ILMN_1814494	SEMA6D	sema domain, transmembrane domain (TM), and cytoplasmic domain, (semaphorin) 6D (SEMA6D), transcript variant 5, mRNA.	NM_153619.1	9.52	7.7	-1.82	12.67
ILMN_1677466	DUSP6	dual specificity phosphatase 6 (DUSP6), transcript variant 1, mRNA.	NM_001946.2	6.38	8.02	1.64	12.67
ILMN_1749014	ACLY	ATP citrate lyase (ACLY), transcript variant 1, mRNA.	NM_001096.2	10.99	12.2	1.22	12.66
ILMN_1769520	UBE2L6	ubiquitin-conjugating enzyme E2L 6 (UBE2L6), transcript variant 1, mRNA.	NM_004223.3	11.35	10.31	-1.04	12.63
ILMN_1747546	TSPAN1	tetraspanin 1 (TSPAN1), mRNA.	NM_005727.2	10.82	9.77	-1.05	12.62
ILMN_1651699	EPS8	epidermal growth factor receptor pathway substrate 8 (EPS8), mRNA.	NM_004447.4	10.16	8.64	-1.52	12.62
ILMN_1662578	C1GALT1	core 1 synthase, glycoprotein-N-acetylgalactosamine 3-beta-galactosyltransferase, 1 (C1GALT1), mRNA.	NM_020156.1	7.4	8.77	1.38	12.6
ILMN_1676663	TNFRSF11B	tumor necrosis factor receptor superfamily, member 11b (osteoprotegerin) (TNFRSF11B), mRNA.	NM_002546.3	7.51	9.04	1.54	12.58
ILMN_1662038	LARGE	like-glycosyltransferase (LARGE), transcript variant 1, mRNA.	NM_004737.3	7.55	8.69	1.14	12.52
ILMN_1735658	RTTN	rotatin (RTTN), mRNA.	NM_173630.2	9.64	10.73	1.09	12.52
ILMN_1726893	EPN3	epsin 3 (EPN3), mRNA.	NM_017957.1	8.67	7.15	-1.52	12.49
ILMN_2386179	ZMYND8	zinc finger, MYND-type containing 8 (ZMYND8), transcript variant 3, mRNA.	NM_183048.1	8.43	7.29	-1.14	12.49
ILMN_1775587	STX19	syntaxin 19 (STX19), mRNA.	NM_001001850.1	8.39	7.09	-1.3	12.48
ILMN_1697491	FLJ14213	protor-2 (FLJ14213), mRNA.	NM_024841.3	5.91	7.12	1.22	12.48
ILMN_2109708	ECGF1	endothelial cell growth factor 1 (platelet-derived) (ECGF1), mRNA.	NM_001953.2	10.36	11.35	0.99	12.47
ILMN_2189027	LIPG	lipase, endothelial (LIPG), mRNA.	NM_006033.2	11.17	12.26	1.09	12.45
ILMN_1666122	HEG1	HEG homolog 1 (zebrafish) (HEG1), mRNA.	NM_020733.1	7.63	8.88	1.25	12.44
ILMN_1799848	ANKRD22	ankyrin repeat domain 22 (ANKRD22), mRNA.	NM_144590.2	7.41	5.82	-1.59	12.43
ILMN_1720114	GMNN	geminin, DNA replication inhibitor (GMNN), mRNA.	NM_015895.3	9.06	7.71	-1.34	12.43
ILMN_2235851	LINCR	likely ortholog of mouse lung-inducible Neutralized-related C3HC4 RING domain protein (LINCR), mRNA.	NM_001080535.1	7.03	5.87	-1.16	12.42
ILMN_1781966	OSBP2	oxysterol binding protein 2 (OSBP2), transcript variant 1, mRNA.	NM_030758.3	6.78	8.13	1.35	12.42
ILMN_1695276	MAPRE2	microtubule-associated protein, RP/EB family, member 2 (MAPRE2), mRNA.	NM_014268.1	11.19	10.33	-0.86	12.4
ILMN_1732516	KNTC1	kinetochore associated 1 (KNTC1), mRNA.	NM_014708.3	10.16	8.86	-1.3	12.39
ILMN_1680624	CREG1	cellular repressor of E1A-stimulated genes 1 (CREG1), mRNA.	NM_003851.2	11.22	10.23	-0.99	12.39
ILMN_1754045	FANCL	Fanconi anemia, complementation group L (FANCL), mRNA.	NM_018062.2	9.23	8.07	-1.16	12.39
ILMN_2328094	DACT1	dapper, antagonist of beta-catenin, homolog 1 (Xenopus laevis) (DACT1), transcript variant 1, mRNA.	NM_016651.5	6.27	7.54	1.26	12.39
ILMN_1752810	LARP6	La ribonucleoprotein domain family, member 6 (LARP6), transcript variant 1, mRNA.	NM_018357.2	9.26	10.36	1.09	12.39
ILMN_1713813	LOC400578	PREDICTED: similar to Keratin, type I cytoskeletal 14 (Cytokeratin-14) (CK-14) (Keratin-14) (K14) (LOC400578), mRNA.	XR_017543.1	10.14	11.57	1.42	12.39
ILMN_1692938	PSAT1	phosphoserine aminotransferase 1 (PSAT1), transcript variant 2, mRNA.	NM_021154.3	10.13	11.33	1.19	12.37
ILMN_1735712	KRT1	keratin 1 (epidermolytic hyperkeratosis) (KRT1), mRNA.	NM_006121.3	11.07	8.47	-2.6	12.34
ILMN_1714278	C9orf30	chromosome 9 open reading frame 30 (C9orf30), mRNA.	NM_080655.1	9.99	11	1.02	12.32
ILMN_1792679	ITGA5	integrin, alpha 5 (fibronectin receptor, alpha polypeptide) (ITGA5), mRNA.	NM_002205.2	7.21	8.68	1.47	12.29
ILMN_1782716	SERPINB4	serpin peptidase inhibitor, clade B (ovalbumin), member 4 (SERPINB4), mRNA.	NM_002974.2	6.95	5.83	-1.12	12.24
ILMN_1651364	PCBD2	pterin-4 alpha-carbinolamine dehydratase/dimerization cofactor of hepatocyte nuclear factor 1 alpha (TCF1) 2 (PCBD2), mRNA.	NM_032151.3	7.75	6.53	-1.22	12.24
ILMN_1689037	LIPG	lipase, endothelial (LIPG), mRNA.	NM_006033.2	9.67	10.98	1.31	12.24
ILMN_1779015	ZNF467	zinc finger protein 467 (ZNF467), mRNA.	NM_207336.1	7.18	6.01	-1.17	12.23
ILMN_2274586	PKD1L2	polycystic kidney disease 1-like 2 (PKD1L2), transcript variant 3, mRNA.	NM_001076780.1	7.06	5.89	-1.17	12.22
ILMN_1667430	DEGS1	degenerative spermatocyte homolog 1, lipid desaturase (Drosophila) (DEGS1), transcript variant 1, mRNA.	NM_003676.2	9.57	10.57	1	12.21
ILMN_2411781	RYR1	ryanodine receptor 1 (skeletal) (RYR1), transcript variant 2, mRNA.	NM_001042723.1	8.35	7.1	-1.25	12.18
ILMN_1702899	PLEKHA7	pleckstrin homology domain containing, family A member 7 (PLEKHA7), mRNA.	NM_175058.3	8.56	7.56	-1	12.16
ILMN_1755937	ANXA2	annexin A2 (ANXA2), transcript variant 2, mRNA.	NM_001002857.1	10.13	11.21	1.09	12.16
ILMN_1702197	C9orf140	chromosome 9 open reading frame 140 (C9orf140), mRNA.	NM_178448.2	8.97	7.89	-1.08	12.15
ILMN_1708778	ASS1	argininosuccinate synthetase 1 (ASS1), transcript variant 1, mRNA.	NM_000050.4	11.85	10.74	-1.12	12.11
ILMN_1735495	TBC1D8	TBC1 domain family, member 8 (with GRAM domain) (TBC1D8), mRNA.	NM_007063.3	8.58	7.43	-1.15	12.11
ILMN_1779171	SGSM2	small G protein signaling modulator 2 (SGSM2), transcript variant 1, mRNA.	NM_014853.2	12.7	11.74	-0.96	12.11
ILMN_1738546	LOC400578	PREDICTED: similar to Keratin, type I cytoskeletal 14 (Cytokeratin-14) (CK-14) (Keratin-14) (K14) (LOC400578), mRNA.	XR_017543.1	8.35	9.86	1.51	12.1
ILMN_2347068	MKNK2	MAP kinase interacting serine/threonine kinase 2 (MKNK2), transcript variant 1, mRNA.	NM_017572.2	12.45	11.52	-0.93	12.09
ILMN_1699856	RALGDS	ral guanine nucleotide dissociation stimulator (RALGDS), transcript variant 1, mRNA.	NM_006266.2	13.2	12.1	-1.1	12.09
ILMN_1781010	ARHGEF3	Rho guanine nucleotide exchange factor (GEF) 3 (ARHGEF3), mRNA.	NM_019555.1	10.44	9.25	-1.19	12.09
ILMN_2388701	ST3GAL5	ST3 beta-galactoside alpha-2,3-sialyltransferase 5 (ST3GAL5), transcript variant 2, mRNA.	NM_001042437.1	6.01	7.47	1.46	12.09
ILMN_1776181	BIRC3	baculoviral IAP repeat-containing 3 (BIRC3), transcript variant 1, mRNA.	NM_001165.3	7.42	6.12	-1.3	12.05
ILMN_1770641	KLHL3	kelch-like 3 (Drosophila) (KLHL3), mRNA.	NM_017415.1	7.49	6.2	-1.29	12.05
ILMN_1683755	SOX13	SRY (sex determining region Y)-box 13 (SOX13), mRNA.	NM_005686.2	9.65	8.63	-1.02	12.04
ILMN_1792409	AMOT	angiomotin (AMOT), transcript variant 2, mRNA.	NM_133265.2	8.83	6.75	-2.08	12.01
ILMN_2307656	AGTRAP	angiotensin II receptor-associated protein (AGTRAP), transcript variant 2, mRNA.	NM_001040194.1	7.02	8.21	1.19	12.01
ILMN_1694075	GADD45A	growth arrest and DNA-damage-inducible, alpha (GADD45A), mRNA.	NM_001924.2	9.51	10.8	1.3	12
ILMN_1874689		primary neuroblastoma cDNA, clone:Nbla10527, full insert sequence		11.31	12.5	1.19	12
ILMN_1781752	CLEC16A	C-type lectin domain family 16, member A (CLEC16A), mRNA.	NM_015226.1	10.45	11.51	1.06	11.99
ILMN_1670145	DFNA5	deafness, autosomal dominant 5 (DFNA5), mRNA.	NM_004403.2	10.98	11.93	0.94	11.99
ILMN_1755620	IER5L	immediate early response 5-like (IER5L), mRNA.	NM_203434.2	7.85	9.08	1.23	11.99
ILMN_2041293	SQLE	squalene epoxidase (SQLE), mRNA.	NM_003129.3	9.87	11.14	1.27	11.98
ILMN_1781745	C9orf152	chromosome 9 open reading frame 152 (C9orf152), mRNA.	NM_001012993.1	7.37	6.19	-1.18	11.96
ILMN_1790228	FURIN	furin (paired basic amino acid cleaving enzyme) (FURIN), mRNA.	NM_002569.2	7.01	8.1	1.09	11.94
ILMN_2383383	PIR	pirin (iron-binding nuclear protein) (PIR), transcript variant 2, mRNA.	NM_001018109.1	11.68	10.55	-1.12	11.93
ILMN_2202967	ARL15	ADP-ribosylation factor-like 15 (ARL15), mRNA.	NM_019087.1	6.58	7.89	1.31	11.93
ILMN_1809613	NGEF	neuronal guanine nucleotide exchange factor (NGEF), mRNA.	NM_019850.1	7.02	8.29	1.28	11.92
ILMN_1752510	FAM13A1	family with sequence similarity 13, member A1 (FAM13A1), transcript variant 2, mRNA.	NM_001015045.1	7.34	6.08	-1.26	11.91
ILMN_1749213	SDF2L1	stromal cell-derived factor 2-like 1 (SDF2L1), mRNA.	NM_022044.2	11.1	12.04	0.94	11.88
ILMN_1763666	ALDH3B2	aldehyde dehydrogenase 3 family, member B2 (ALDH3B2), transcript variant 2, mRNA.	NM_001031615.1	7.76	6.27	-1.49	11.86
ILMN_1675646	FN1	fibronectin 1 (FN1), transcript variant 7, mRNA.	NM_054034.2	5.61	7.27	1.67	11.85
ILMN_1748831	PPP1R13B	protein phosphatase 1, regulatory (inhibitor) subunit 13B (PPP1R13B), mRNA.	NM_015316.2	10.45	9.46	-0.99	11.84
ILMN_1674609	CLTB	clathrin, light chain (Lcb) (CLTB), transcript variant 2, mRNA.	NM_007097.2	11.9	12.75	0.86	11.84
ILMN_1664511	NDC80	NDC80 homolog, kinetochore complex component (S. cerevisiae) (NDC80), mRNA.	NM_006101.1	8.26	6.9	-1.37	11.83
ILMN_2341595	KITLG	KIT ligand (KITLG), transcript variant b, mRNA.	NM_000899.3	8.88	7.58	-1.3	11.78
ILMN_1717326	SLC29A3	solute carrier family 29 (nucleoside transporters), member 3 (SLC29A3), mRNA.	NM_018344.3	8.59	7.47	-1.12	11.78
ILMN_2413899	MCM10	minichromosome maintenance complex component 10 (MCM10), transcript variant 2, mRNA.	NM_018518.3	6.85	5.81	-1.04	11.77
ILMN_1700306	OCIAD2	OCIA domain containing 2 (OCIAD2), transcript variant 1, mRNA.	NM_001014446.1	11.82	12.6	0.77	11.76
ILMN_1702496	LOC441461	PREDICTED: hypothetical gene supported by BC030123 (LOC441461), mRNA.	XM_499157.3	7.23	6.03	-1.2	11.75
ILMN_1752269	ACSS1	acyl-CoA synthetase short-chain family member 1 (ACSS1), nuclear gene encoding mitochondrial protein, mRNA.	NM_032501.2	7.1	5.96	-1.14	11.75
ILMN_1682929	SYTL2	synaptotagmin-like 2 (SYTL2), transcript variant d, mRNA.	NM_206928.1	7.23	6.08	-1.16	11.74
ILMN_1750664	PPT2	palmitoyl-protein thioesterase 2 (PPT2), transcript variant 2, mRNA.	NM_138717.1	7.56	6.38	-1.17	11.73
ILMN_1656285	METTL7A	methyltransferase like 7A (METTL7A), mRNA.	NM_014033.3	9.17	7.65	-1.52	11.71
ILMN_1775486	SSPN	sarcospan (Kras oncogene-associated gene) (SSPN), mRNA.	NM_005086.3	8.94	7.66	-1.29	11.71
ILMN_2331544	MBP	myelin basic protein (MBP), transcript variant 7, mRNA.	NM_001025101.1	9.94	8.67	-1.28	11.69
ILMN_2383300	PTPRU	protein tyrosine phosphatase, receptor type, U (PTPRU), transcript variant 3, mRNA.	NM_005704.3	8.38	7.12	-1.26	11.68
ILMN_1791726	TUBB3	tubulin, beta 3 (TUBB3), mRNA.	NM_006086.2	10.77	11.79	1.02	11.68
ILMN_1680774	LOC730994	PREDICTED: similar to NACHT, leucine rich repeat and PYD (pyrin domain) containing 1, transcript variant 1 (LOC730994), mRNA.	XM_001132373.1	6.75	8.06	1.32	11.67
ILMN_1663119	DSC2	desmocollin 2 (DSC2), transcript variant Dsc2b, mRNA.	NM_004949.2	10.99	12.01	1.02	11.66
ILMN_1809522	BTBD14A	BTB (POZ) domain containing 14A (BTBD14A), mRNA.	NM_144653.3	9.05	10.03	0.98	11.66
ILMN_1777190	CFD	complement factor D (adipsin) (CFD), mRNA.	NM_001928.2	8.65	7.43	-1.22	11.65
ILMN_1709820	AOAH	acyloxyacyl hydrolase (neutrophil) (AOAH), mRNA.	NM_001637.1	7.33	6.14	-1.19	11.65
ILMN_1794017	SERTAD1	SERTA domain containing 1 (SERTAD1), mRNA.	NM_013376.3	9.19	10.1	0.9	11.65
ILMN_2398939	MBP	myelin basic protein (MBP), transcript variant 3, mRNA.	NM_001025090.1	10.35	9.18	-1.17	11.63
ILMN_1796755	ITGB5	integrin, beta 5 (ITGB5), mRNA. XM_944688 XM_944693	NM_002213.3	8.34	9.41	1.07	11.62
ILMN_1745397	OAS3	2'-5'-oligoadenylate synthetase 3, 100kDa (OAS3), mRNA.	NM_006187.2	8.71	7.19	-1.52	11.61
ILMN_1814526	ADD3	adducin 3 (gamma) (ADD3), transcript variant 3, mRNA.	NM_001121.2	9.84	8.6	-1.24	11.6
ILMN_1679133	SERPINB1	serpin peptidase inhibitor, clade B (ovalbumin), member 1 (SERPINB1), mRNA.	NM_030666.2	9.54	8.38	-1.16	11.6
ILMN_1695414	ASF1B	ASF1 anti-silencing function 1 homolog B (S. cerevisiae) (ASF1B), mRNA.	NM_018154.2	8.28	6.63	-1.65	11.59
ILMN_1782070	NPL	N-acetylneuraminate pyruvate lyase (dihydrodipicolinate synthase) (NPL), mRNA.	NM_030769.1	8.16	7.07	-1.09	11.59
ILMN_2399919	MLXIPL	MLX interacting protein-like (MLXIPL), transcript variant 3, mRNA.	NM_032953.2	7.58	6.47	-1.11	11.59
ILMN_1745223	CDC42EP4	CDC42 effector protein (Rho GTPase binding) 4 (CDC42EP4), mRNA.	NM_012121.4	11.25	10.35	-0.9	11.59
ILMN_1686664	MT2A	metallothionein 2A (MT2A), mRNA.	NM_005953.2	14.04	13.14	-0.9	11.59
ILMN_2414325	TNFAIP8	tumor necrosis factor, alpha-induced protein 8 (TNFAIP8), transcript variant 2, mRNA.	NM_001077654.1	8.8	9.85	1.04	11.59
ILMN_1673113	F2RL1	coagulation factor II (thrombin) receptor-like 1 (F2RL1), mRNA.	NM_005242.3	9.13	10.06	0.93	11.57
ILMN_1687768	NCOA7	nuclear receptor coactivator 7 (NCOA7), mRNA.	NM_181782.2	11.57	10.51	-1.06	11.56
ILMN_1765208	GLUL	glutamate-ammonia ligase (glutamine synthetase) (GLUL), transcript variant 3, mRNA.	NM_001033056.1	8.56	7.24	-1.32	11.55
ILMN_1758250	TRAFD1	TRAF-type zinc finger domain containing 1 (TRAFD1), mRNA.	NM_006700.1	10.14	8.8	-1.34	11.54
ILMN_1676413	VSNL1	visinin-like 1 (VSNL1), mRNA.	NM_003385.4	10.88	9.9	-0.99	11.54
ILMN_2173611	MT1E	metallothionein 1E (MT1E), mRNA.	NM_175617.3	13.7	12.89	-0.81	11.53
ILMN_1815102	LCAT	lecithin-cholesterol acyltransferase (LCAT), mRNA.	NM_000229.1	7.23	8.48	1.25	11.53
ILMN_2328986	SREBF1	sterol regulatory element binding transcription factor 1 (SREBF1), transcript variant 2, mRNA.	NM_004176.3	9.86	8.81	-1.04	11.52
ILMN_2060413	CD24	CD24 molecule (CD24), mRNA.	NM_013230.2	14.03	14.86	0.82	11.51
ILMN_2085862	SLC15A3	solute carrier family 15, member 3 (SLC15A3), mRNA.	NM_016582.1	7.87	6.77	-1.1	11.49
ILMN_1744023	MGC18216	PREDICTED: hypothetical protein MGC18216 (MGC18216), mRNA.	XM_927732.1	9.96	11.03	1.07	11.48
ILMN_1741780	DUSP28	dual specificity phosphatase 28 (DUSP28), mRNA.	NM_001033575.1	9.4	8.53	-0.88	11.47
ILMN_1858599		AV652851 GLC cDNA clone GLCDEG06 3, mRNA sequence		7.48	6.16	-1.32	11.47
ILMN_1735014	KLF6	Kruppel-like factor 6 (KLF6), transcript variant 2, mRNA.	NM_001300.4	10.75	11.86	1.11	11.47
ILMN_1701204	VEGFC	vascular endothelial growth factor C (VEGFC), mRNA.	NM_005429.2	6.48	7.58	1.1	11.47
ILMN_1801246	IFITM1	interferon induced transmembrane protein 1 (9-27) (IFITM1), mRNA.	NM_003641.3	10.93	9.84	-1.08	11.45
ILMN_1745570	KLK7	kallikrein-related peptidase 7 (KLK7), transcript variant 1, mRNA.	NM_005046.2	11.26	10.21	-1.05	11.45
ILMN_2183510	ARMET	arginine-rich, mutated in early stage tumors (ARMET), mRNA.	NM_006010.2	10.97	11.88	0.91	11.45
ILMN_1668236	KCNB2	potassium voltage-gated channel, Shab-related subfamily, member 2 (KCNB2), mRNA.	NM_004770.2	7.06	5.88	-1.18	11.44
ILMN_1754757	SCNN1D	sodium channel, nonvoltage-gated 1, delta (SCNN1D), mRNA.	NM_002978.2	8.34	7.26	-1.08	11.44
ILMN_1785284	ALDH6A1	aldehyde dehydrogenase 6 family, member A1 (ALDH6A1), nuclear gene encoding mitochondrial protein, mRNA.	NM_005589.2	9.48	8.53	-0.95	11.43
ILMN_1752520	SLFN11	schlafen family member 11 (SLFN11), mRNA.	NM_152270.2	8.39	7.29	-1.1	11.42
ILMN_1745076	CLINT1	clathrin interactor 1 (CLINT1), mRNA.	NM_014666.2	11.1	10.05	-1.06	11.4
ILMN_1668863	LYPD1	LY6/PLAUR domain containing 1 (LYPD1), transcript variant 1, mRNA.	NM_144586.5	8.8	10.18	1.38	11.4
ILMN_2326713	CD151	CD151 molecule (Raph blood group) (CD151), transcript variant 2, mRNA.	NM_139030.3	13.79	14.64	0.86	11.4
ILMN_2094061	IMPA2	inositol(myo)-1(or 4)-monophosphatase 2 (IMPA2), mRNA.	NM_014214.1	10.31	9.37	-0.94	11.39
ILMN_2367070	ACOT9	acyl-CoA thioesterase 9 (ACOT9), transcript variant 1, mRNA.	NM_001037171.1	8.41	9.48	1.06	11.39
ILMN_1662587	PNPLA7	patatin-like phospholipase domain containing 7 (PNPLA7), mRNA.	NM_152286.2	8.56	7.38	-1.18	11.34
ILMN_1784948	SPOCD1	SPOC domain containing 1 (SPOCD1), mRNA.	NM_144569.4	7.27	8.56	1.29	11.34
ILMN_1837428		clone 25194 mRNA sequence		10.62	9.51	-1.1	11.33
ILMN_2371379	ACLY	ATP citrate lyase (ACLY), transcript variant 2, mRNA.	NM_198830.1	11.52	12.57	1.06	11.33
ILMN_2314169	PTHLH	parathyroid hormone-like hormone (PTHLH), transcript variant 1, mRNA.	NM_198965.1	12.93	13.92	1	11.32
ILMN_2350574	MYADM	myeloid-associated differentiation marker (MYADM), transcript variant 2, mRNA.	NM_138373.3	7.4	8.92	1.51	11.32
ILMN_1865056		Homo sapiens, clone IMAGE:5241654, mRNA		7.34	6.31	-1.03	11.3
ILMN_1724789	CD59	CD59 molecule, complement regulatory protein (CD59), transcript variant 2, mRNA.	NM_000611.4	9.28	10.42	1.13	11.3
ILMN_2088124	TMEM154	transmembrane protein 154 (TMEM154), mRNA.	NM_152680.1	10.4	11.43	1.03	11.3
ILMN_1720710	HSPB3	heat shock 27kDa protein 3 (HSPB3), mRNA.	NM_006308.1	9.77	10.88	1.11	11.29
ILMN_1766658	PKMYT1	protein kinase, membrane associated tyrosine/threonine 1 (PKMYT1), transcript variant 2, mRNA.	NM_182687.1	8.01	6.85	-1.16	11.28
ILMN_2349393	MDK	midkine (neurite growth-promoting factor 2) (MDK), transcript variant 1, mRNA.	NM_001012334.1	11.88	10.89	-1	11.27
ILMN_1742789	LPXN	leupaxin (LPXN), mRNA.	NM_004811.1	8.96	7.96	-1	11.26
ILMN_1725193	IGFBP2	insulin-like growth factor binding protein 2, 36kDa (IGFBP2), mRNA.	NM_000597.2	7.69	6.35	-1.34	11.25
ILMN_1771841	FOSL1	FOS-like antigen 1 (FOSL1), mRNA.	NM_005438.2	6.22	7.65	1.43	11.25
ILMN_2149164	SFRP1	secreted frizzled-related protein 1 (SFRP1), mRNA.	NM_003012.3	6.08	7.13	1.05	11.24
ILMN_1749478	TCEAL3	transcription elongation factor A (SII)-like 3 (TCEAL3), transcript variant 2, mRNA.	NM_032926.2	10.28	11.46	1.18	11.24
ILMN_1678805	POMT2	protein-O-mannosyltransferase 2 (POMT2), mRNA.	NM_013382.3	8.64	9.55	0.92	11.22
ILMN_1760990	SH3GL3	SH3-domain GRB2-like 3 (SH3GL3), mRNA.	NM_003027.2	5.96	6.89	0.93	11.22
ILMN_1658995	ACOT9	acyl-CoA thioesterase 9 (ACOT9), transcript variant 2, mRNA.	NM_001033583.2	10.23	11.18	0.95	11.21
ILMN_2052871	TMEM116	transmembrane protein 116 (TMEM116), mRNA.	NM_138341.1	8.74	7.67	-1.07	11.2
ILMN_2316236	HOPX	HOP homeobox (HOPX), transcript variant 3, mRNA.	NM_139212.2	7.39	6.08	-1.31	11.19
ILMN_2206474	C20orf39	chromosome 20 open reading frame 39 (C20orf39), mRNA.	NM_024893.1	6.15	7.17	1.01	11.17
ILMN_2410826	OAS1	2',5'-oligoadenylate synthetase 1, 40/46kDa (OAS1), transcript variant 3, mRNA.	NM_001032409.1	7.99	6.35	-1.63	11.16
ILMN_2311278	ADD3	adducin 3 (gamma) (ADD3), transcript variant 3, mRNA.	NM_001121.2	8.54	6.84	-1.7	11.16
ILMN_1680591	RTKN	rhotekin (RTKN), transcript variant 2, mRNA.	NM_033046.2	11.21	12.19	0.98	11.16
ILMN_1683905	C19orf21	chromosome 19 open reading frame 21 (C19orf21), mRNA.	NM_173481.2	8.23	9.3	1.07	11.16
ILMN_1671906	MND1	meiotic nuclear divisions 1 homolog (S. cerevisiae) (MND1), mRNA.	NM_032117.2	7.26	6.03	-1.22	11.15
ILMN_1768558	LOC727848	PREDICTED: similar to actin-like protein (LOC727848), mRNA.	XM_001125941.1	6.95	8.18	1.23	11.15
ILMN_1738093	TMEM118	transmembrane protein 118 (TMEM118), mRNA.	NM_032814.2	7.87	6.98	-0.9	11.12
ILMN_1719236	CDH5	cadherin 5, type 2, VE-cadherin (vascular epithelium) (CDH5), mRNA.	NM_001795.2	6.77	5.78	-0.98	11.12
ILMN_1727459	ORC1L	origin recognition complex, subunit 1-like (yeast) (ORC1L), mRNA.	NM_004153.2	7.26	6.13	-1.12	11.11
ILMN_1721354	KRT6B	keratin 6B (KRT6B), mRNA.	NM_005555.3	7.51	8.83	1.32	11.11
ILMN_1791580	FXYD3	FXYD domain containing ion transport regulator 3 (FXYD3), transcript variant 1, mRNA.	NM_005971.2	10.65	9.64	-1.02	11.1
ILMN_2241124	GPR110	G protein-coupled receptor 110 (GPR110), transcript variant 1, mRNA.	NM_153840.2	8.71	7.41	-1.3	11.1
ILMN_1655347	SCGB1A1	secretoglobin, family 1A, member 1 (uteroglobin) (SCGB1A1), mRNA.	NM_003357.3	12.03	10.08	-1.96	11.08
ILMN_1688372	C3orf17	chromosome 3 open reading frame 17 (C3orf17), transcript variant 2, mRNA.	NM_001025072.2	8.02	9.35	1.33	11.08
ILMN_2343047	ABCB9	ATP-binding cassette, sub-family B (MDR/TAP), member 9 (ABCB9), transcript variant 2, mRNA.	NM_019624.2	8.06	6.89	-1.17	11.06
ILMN_2398107	ASNS	asparagine synthetase (ASNS), transcript variant 1, mRNA.	NM_133436.1	7.16	9.25	2.08	11.06
ILMN_1709484	BLM	Bloom syndrome (BLM), mRNA.	NM_000057.2	7.8	6.6	-1.19	11.04
ILMN_1793572	C21orf81	chromosome 21 open reading frame 81 (C21orf81), mRNA.	NM_153750.1	9.75	8.55	-1.2	11.01
ILMN_1857335		cDNA FLJ35432 fis, clone SMINT2002311		9.35	8.14	-1.21	11.01
ILMN_1682738	SMAD3	SMAD family member 3 (SMAD3), mRNA.	NM_005902.3	11.48	10.54	-0.94	11
ILMN_2371458	CXCR7	chemokine (C-X-C motif) receptor 7 (CXCR7), transcript variant 1, mRNA.	NM_001047841.1	10.16	11.31	1.15	10.99
ILMN_1772074	C19orf51	chromosome 19 open reading frame 51 (C19orf51), mRNA.	NM_178837.3	9.64	8.77	-0.87	10.98
ILMN_1708064	MAP4	microtubule-associated protein 4 (MAP4), transcript variant 1, mRNA.	NM_002375.3	6.84	7.98	1.14	10.98
ILMN_2136089	MTE	metallothionein E (MTE), mRNA.	NM_175621.2	11.29	10.4	-0.89	10.97
ILMN_1780132	PELI2	pellino homolog 2 (Drosophila) (PELI2), mRNA.	NM_021255.2	7.98	6.41	-1.57	10.97
ILMN_1797277	KIF3C	kinesin family member 3C (KIF3C), mRNA.	NM_002254.6	6.19	7.37	1.18	10.97
ILMN_1819384		AGENCOURT_14535501 NIH_MGC_191 cDNA clone IMAGE:30415823 5, mRNA sequence		7.23	8.72	1.49	10.95
ILMN_2405470	KLHDC9	kelch domain containing 9 (KLHDC9), transcript variant 2, mRNA.	NM_001007255.1	8.22	6.95	-1.27	10.94
ILMN_1773963	GNA15	guanine nucleotide binding protein (G protein), alpha 15 (Gq class) (GNA15), mRNA.	NM_002068.1	10.58	11.5	0.92	10.94
ILMN_1812526	TGFB2	transforming growth factor, beta 2 (TGFB2), mRNA.	NM_003238.1	6.2	7.37	1.17	10.92
ILMN_1690523	LRRC20	leucine rich repeat containing 20 (LRRC20), transcript variant 2, mRNA.	NM_018239.2	9.22	8.07	-1.15	10.91
ILMN_2206272	D2HGDH	D-2-hydroxyglutarate dehydrogenase (D2HGDH), nuclear gene encoding mitochondrial protein, mRNA.	NM_152783.3	11.78	10.89	-0.9	10.89
ILMN_1706610	PLEKHA9	pleckstrin homology domain containing, family A (phosphoinositide binding specific) member 9 (PLEKHA9), mRNA.	NM_015899.1	8.78	9.76	0.98	10.89
ILMN_1653180	TPM4	tropomyosin 4 (TPM4), mRNA.	NM_003290.1	8.78	10.08	1.3	10.89
ILMN_1745807	TMEM62	transmembrane protein 62 (TMEM62), mRNA.	NM_024956.3	9.72	8.84	-0.87	10.87
ILMN_2368718	CENPM	centromere protein M (CENPM), transcript variant 2, mRNA.	NM_001002876.1	8.66	7.62	-1.04	10.86
ILMN_1691731	PARP14	poly (ADP-ribose) polymerase family, member 14 (PARP14), mRNA.	NM_017554.1	8.66	7.62	-1.04	10.84
ILMN_1813840	AOF2	amine oxidase (flavin containing) domain 2 (AOF2), transcript variant 2, mRNA.	NM_015013.2	11.34	10.58	-0.76	10.84
ILMN_1801216	S100P	S100 calcium binding protein P (S100P), mRNA.	NM_005980.2	7.45	8.71	1.26	10.84
ILMN_1775759	NRAS	neuroblastoma RAS viral (v-ras) oncogene homolog (NRAS), mRNA.	NM_002524.2	8.26	9.3	1.04	10.81
ILMN_1750596	CLUAP1	clusterin associated protein 1 (CLUAP1), transcript variant 2, mRNA.	NM_024793.1	9.25	8.06	-1.19	10.8
ILMN_1718152	DEPDC7	DEP domain containing 7 (DEPDC7), transcript variant 2, mRNA.	NM_139160.2	7.06	8.25	1.19	10.8
ILMN_1728742	C5orf4	chromosome 5 open reading frame 4 (C5orf4), transcript variant 2, mRNA.	NM_032385.3	6.89	5.79	-1.1	10.79
ILMN_1712708	TRIM47	tripartite motif-containing 47 (TRIM47), mRNA.	NM_033452.2	7.6	9.21	1.62	10.79
ILMN_1815666	ATP2A2	ATPase, Ca++ transporting, cardiac muscle, slow twitch 2 (ATP2A2), transcript variant 1, mRNA.	NM_170665.2	9.44	10.62	1.19	10.78
ILMN_1655884	ATP2A2	ATPase, Ca++ transporting, cardiac muscle, slow twitch 2 (ATP2A2), transcript variant 1, mRNA.	NM_170665.2	8.92	10.12	1.2	10.78
ILMN_1765578	TIPARP	TCDD-inducible poly(ADP-ribose) polymerase (TIPARP), mRNA.	NM_015508.3	10.89	11.94	1.04	10.77
ILMN_1736939	UGCG	UDP-glucose ceramide glucosyltransferase (UGCG), mRNA.	NM_003358.1	10.78	9.7	-1.08	10.74
ILMN_1776519	RAP1GAP	RAP1 GTPase activating protein (RAP1GAP), mRNA.	NM_002885.1	11.04	10.17	-0.86	10.73
ILMN_1789058	C1orf188	chromosome 1 open reading frame 188 (C1orf188), mRNA.	NM_173795.2	9.4	8.29	-1.11	10.7
ILMN_1652237	CBR3	carbonyl reductase 3 (CBR3), mRNA.	NM_001236.3	10.56	8.99	-1.57	10.7
ILMN_1654268	HMGB2	high-mobility group box 2 (HMGB2), mRNA.	NM_002129.2	9.49	8.26	-1.23	10.7
ILMN_1718968	MT1E	metallothionein 1E (functional) (MT1E), mRNA.	NM_175617.2	7.37	6.39	-0.98	10.7
ILMN_1806733	COL18A1	collagen, type XVIII, alpha 1 (COL18A1), transcript variant 2, mRNA.	NM_130445.2	9.56	10.61	1.04	10.69
ILMN_1829916		Homo sapiens, clone IMAGE:3446976, mRNA		5.78	7.09	1.31	10.69
ILMN_1656452	C16orf59	chromosome 16 open reading frame 59 (C16orf59), mRNA.	NM_025108.2	8.59	7.32	-1.26	10.68
ILMN_1683146	FTH1	ferritin, heavy polypeptide 1 (FTH1), mRNA.	NM_002032.2	12.99	12.18	-0.81	10.68
ILMN_2134056	SOX7	SRY (sex determining region Y)-box 7 (SOX7), mRNA.	NM_031439.2	9.6	8.36	-1.24	10.66
ILMN_1657679	VAV3	vav 3 guanine nucleotide exchange factor (VAV3), transcript variant 1, mRNA.	NM_006113.4	10.03	8.47	-1.56	10.65
ILMN_1743232	MICALCL	MICAL C-terminal like (MICALCL), mRNA.	NM_032867.2	7.66	8.9	1.24	10.65
ILMN_2383163	DEPDC7	DEP domain containing 7 (DEPDC7), transcript variant 1, mRNA.	NM_001077242.1	6.88	8.2	1.32	10.63
ILMN_1698934	CMTM7	CKLF-like MARVEL transmembrane domain containing 7 (CMTM7), transcript variant 2, mRNA.	NM_181472.1	10.63	11.58	0.96	10.62
ILMN_1679949	SLC25A23	solute carrier family 25 (mitochondrial carrier; phosphate carrier), member 23 (SLC25A23), nuclear gene encoding mitochondrial protein, mRNA.	NM_024103.2	11.83	11.02	-0.81	10.61
ILMN_2358541	RBMS1	RNA binding motif, single stranded interacting protein 1 (RBMS1), transcript variant 3, mRNA.	NM_002897.3	8.2	9.23	1.03	10.61
ILMN_1762606	AQP11	aquaporin 11 (AQP11), mRNA.	NM_173039.1	7.73	6.66	-1.07	10.6
ILMN_1795822	DIS3L	DIS3 mitotic control homolog (S. cerevisiae)-like (DIS3L), mRNA.	NM_133375.2	11.17	10.41	-0.76	10.6
ILMN_2215640	TUBA3D	tubulin, alpha 3d (TUBA3D), mRNA.	NM_080386.1	7.51	8.81	1.3	10.6
ILMN_1798808	FOXH1	forkhead box H1 (FOXH1), mRNA.	NM_003923.1	6.96	8.01	1.04	10.6
ILMN_1666445	CAMK2A	calcium/calmodulin-dependent protein kinase (CaM kinase) II alpha (CAMK2A), transcript variant 2, mRNA.	NM_171825.1	7.33	6.15	-1.18	10.57
ILMN_2048700	ATAD2	ATPase family, AAA domain containing 2 (ATAD2), mRNA.	NM_014109.2	8.59	7.1	-1.49	10.56
ILMN_1775566	ATP1A1	ATPase, Na+/K+ transporting, alpha 1 polypeptide (ATP1A1), transcript variant 1, mRNA.	NM_000701.6	10.58	9.36	-1.22	10.56
ILMN_1810420	DYSF	dysferlin, limb girdle muscular dystrophy 2B (autosomal recessive) (DYSF), mRNA.	NM_003494.2	7.04	8.36	1.32	10.56
ILMN_1679837	SGPP1	sphingosine-1-phosphate phosphatase 1 (SGPP1), mRNA.	NM_030791.2	7.98	6.68	-1.29	10.55
ILMN_1658847	MGC61598	PREDICTED: similar to ankyrin-repeat protein Nrarp (MGC61598), mRNA.	XM_939432.1	10.06	8.95	-1.11	10.55
ILMN_1761259	EXT2	exostoses (multiple) 2 (EXT2), transcript variant 1, mRNA.	NM_000401.2	10.05	11.02	0.98	10.55
ILMN_1805792	TRIO	triple functional domain (PTPRF interacting) (TRIO), mRNA.	NM_007118.2	7.18	8.4	1.21	10.55
ILMN_1708375	IRF1	interferon regulatory factor 1 (IRF1), mRNA.	NM_002198.1	11.04	10.06	-0.97	10.52
ILMN_1741440	SLC35A1	solute carrier family 35 (CMP-sialic acid transporter), member A1 (SLC35A1), mRNA.	NM_006416.3	10.17	9.14	-1.03	10.51
ILMN_2041190	F2RL1	coagulation factor II (thrombin) receptor-like 1 (F2RL1), mRNA.	NM_005242.3	10.31	11.2	0.88	10.51
ILMN_1668814	CENPM	centromere protein M (CENPM), transcript variant 1, mRNA.	NM_024053.3	7.57	6.33	-1.24	10.5
ILMN_2153679	TBC1D3B	TBC1 domain family, member 3B (TBC1D3B), mRNA.	NM_001001417.4	8	6.93	-1.08	10.5
ILMN_2261076	NEDD9	neural precursor cell expressed, developmentally down-regulated 9 (NEDD9), transcript variant 1, mRNA.	NM_006403.2	9.24	10.47	1.24	10.49
ILMN_1687721	PROC	protein C (inactivator of coagulation factors Va and VIIIa) (PROC), mRNA.	NM_000312.1	9.06	10.11	1.05	10.49
ILMN_1803745	SUOX	sulfite oxidase (SUOX), nuclear gene encoding mitochondrial protein, transcript variant 1, mRNA.	NM_000456.2	10.84	10.11	-0.73	10.46
ILMN_1659215	CYP4B1	cytochrome P450, family 4, subfamily B, polypeptide 1 (CYP4B1), transcript variant 2, mRNA.	NM_000779.3	6.84	5.78	-1.06	10.45
ILMN_1791826	RAB25	RAB25, member RAS oncogene family (RAB25), mRNA.	NM_020387.2	11.71	11.01	-0.7	10.44
ILMN_1683470	TMEM139	transmembrane protein 139 (TMEM139), mRNA.	NM_153345.1	7.96	6.97	-0.99	10.44
ILMN_1689842	SC4MOL	sterol-C4-methyl oxidase-like (SC4MOL), transcript variant 1, mRNA.	NM_006745.3	8.76	10.35	1.59	10.42
ILMN_1715384	B3GNT6	UDP-GlcNAc:betaGal beta-1,3-N-acetylglucosaminyltransferase 6 (B3GNT6), mRNA.	NM_006876.1	8.7	7.58	-1.12	10.4
ILMN_1713952	C1orf106	chromosome 1 open reading frame 106 (C1orf106), mRNA.	NM_018265.1	11.33	12.28	0.95	10.39
ILMN_1815023	PIM1	pim-1 oncogene (PIM1), mRNA.	NM_002648.2	9.19	10.06	0.86	10.39
ILMN_1659761	SNX29	sorting nexin 29 (SNX29), mRNA.	NM_001080530.2	9.12	9.99	0.87	10.39
ILMN_1880611		df27f11.w1 Morton Fetal Cochlea cDNA clone IMAGE:2484644 3, mRNA sequence		6.15	7.21	1.06	10.38
ILMN_1770922	TMEM45A	transmembrane protein 45A (TMEM45A), mRNA.	NM_018004.1	8.08	9.17	1.09	10.37
ILMN_1683494	TMEM154	transmembrane protein 154 (TMEM154), mRNA.	NM_152680.1	8.27	9.28	1.02	10.36
ILMN_1699695	TNFRSF21	tumor necrosis factor receptor superfamily, member 21 (TNFRSF21), mRNA.	NM_014452.3	11.63	12.78	1.15	10.32
ILMN_1764082	MBOAT1	membrane bound O-acyltransferase domain containing 1 (MBOAT1), mRNA.	NM_001080480.1	9.74	8.68	-1.06	10.31
ILMN_1764629	SLC39A14	solute carrier family 39 (zinc transporter), member 14 (SLC39A14), mRNA.	NM_015359.2	8.9	10.02	1.12	10.3
ILMN_1868583		CHR90153 Chromosome 9 exon II cDNA clone P94_106 5 and 3', mRNA sequence		6.87	5.96	-0.91	10.29
ILMN_1664861	ID1	inhibitor of DNA binding 1, dominant negative helix-loop-helix protein (ID1), transcript variant 2, mRNA.	NM_181353.1	11.45	10.41	-1.04	10.28
ILMN_2397750	IVNS1ABP	influenza virus NS1A binding protein (IVNS1ABP), mRNA.	NM_006469.4	8.9	10.73	1.83	10.27
ILMN_2140974	TPM4	tropomyosin 4 (TPM4), mRNA.	NM_003290.1	8.51	9.77	1.27	10.26
ILMN_1696403	LOC645287	PREDICTED: similar to Group X secretory phospholipase A2 precursor (Phosphatidylcholine 2-acylhydrolase GX) (GX sPLA2) (sPLA2-X) (LOC645287), mRNA.	XM_928331.1	6.85	5.77	-1.08	10.25
ILMN_1719664	PTPN21	protein tyrosine phosphatase, non-receptor type 21 (PTPN21), mRNA.	NM_007039.3	6.84	7.87	1.03	10.25
ILMN_1691930	CBX6	chromobox homolog 6 (CBX6), mRNA.	NM_014292.3	11.05	10.09	-0.96	10.24
ILMN_2298301	BNC1	basonuclin 1 (BNC1), mRNA.	NM_001717.2	8.48	9.68	1.2	10.23
ILMN_2141790	HYOU1	hypoxia up-regulated 1 (HYOU1), mRNA.	NM_006389.2	7.45	8.5	1.06	10.22
ILMN_1655261	ERP27	endoplasmic reticulum protein 27 kDa (ERP27), mRNA.	NM_152321.1	6.81	5.81	-1	10.21
ILMN_2355042	CLUAP1	clusterin associated protein 1 (CLUAP1), transcript variant 1, mRNA.	NM_015041.1	9.6	8.67	-0.93	10.21
ILMN_1731358	ZNF532	zinc finger protein 532 (ZNF532), mRNA.	NM_018181.4	8.84	9.79	0.94	10.21
ILMN_1782141	GRHL3	grainyhead-like 3 (Drosophila) (GRHL3), transcript variant 1, mRNA.	NM_021180.2	7.72	6.48	-1.24	10.17
ILMN_1783253	DDX12	PREDICTED: DEAD/H (Asp-Glu-Ala-Asp/His) box polypeptide 12 (CHL1-like helicase homolog, S. cerevisiae), transcript variant 4 (DDX12), mRNA.	XM_931833.1	7.61	6.51	-1.09	10.16
ILMN_1714820	ITGB1	integrin, beta 1 (fibronectin receptor, beta polypeptide, antigen CD29 includes MDF2, MSK12) (ITGB1), transcript variant 1D, mRNA.	NM_033668.1	11.02	12.14	1.12	10.16
ILMN_2401344	PPP2R2C	protein phosphatase 2 (formerly 2A), regulatory subunit B, gamma isoform (PPP2R2C), transcript variant 2, mRNA.	NM_181876.2	7.51	8.46	0.95	10.16
ILMN_1784454	ITGB1	integrin, beta 1 (fibronectin receptor, beta polypeptide, antigen CD29 includes MDF2, MSK12) (ITGB1), transcript variant 1E, mRNA.	NM_133376.1	6.82	8.11	1.29	10.16
ILMN_2393341	LIAS	lipoic acid synthetase (LIAS), nuclear gene encoding mitochondrial protein, transcript variant 2, mRNA.	NM_194451.1	7.67	6.69	-0.98	10.15
ILMN_1771652	BAIAP2L2	BAI1-associated protein 2-like 2 (BAIAP2L2), mRNA.	NM_025045.4	8.98	8.19	-0.78	10.12
ILMN_1778845	FAM111A	family with sequence similarity 111, member A (FAM111A), transcript variant 1, mRNA.	NM_022074.2	9.12	8.02	-1.1	10.11
ILMN_1683026	PSMB10	proteasome (prosome, macropain) subunit, beta type, 10 (PSMB10), mRNA.	NM_002801.2	12.27	11.47	-0.8	10.1
ILMN_1775742	RNF128	ring finger protein 128 (RNF128), transcript variant 2, mRNA.	NM_024539.3	7.67	8.73	1.06	10.09
ILMN_1685005	TNFRSF1A	tumor necrosis factor receptor superfamily, member 1A (TNFRSF1A), mRNA.	NM_001065.2	11.3	10.51	-0.79	10.08
ILMN_1665510	ERRFI1	ERBB receptor feedback inhibitor 1 (ERRFI1), mRNA.	NM_018948.2	7.78	8.91	1.13	10.08
ILMN_2185984	SASH1	SAM and SH3 domain containing 1 (SASH1), mRNA.	NM_015278.3	9.55	8.41	-1.14	10.06
ILMN_1784608	CLEC2B	C-type lectin domain family 2, member B (CLEC2B), mRNA.	NM_005127.2	7.96	6.8	-1.16	10.05
ILMN_1771728	PXMP4	peroxisomal membrane protein 4, 24kDa (PXMP4), transcript variant 2, mRNA.	NM_183397.2	9.57	8.43	-1.13	10.05
ILMN_2376108	PSMB9	proteasome (prosome, macropain) subunit, beta type, 9 (large multifunctional peptidase 2) (PSMB9), transcript variant 1, mRNA.	NM_002800.4	8.25	6.96	-1.29	10.02
ILMN_1794885	FRMD5	FERM domain containing 5 (FRMD5), transcript variant 2, mRNA.	NM_032892.3	6.26	7.37	1.11	10.02
ILMN_1701482	POFUT2	protein O-fucosyltransferase 2 (POFUT2), transcript variant 1, mRNA.	NM_015227.4	8.52	9.59	1.07	10.02
ILMN_1701461	TIMP3	TIMP metallopeptidase inhibitor 3 (Sorsby fundus dystrophy, pseudoinflammatory) (TIMP3), mRNA.	NM_000362.4	9.03	7.49	-1.55	10.01
ILMN_1748844	CNKSR3	CNKSR family member 3 (CNKSR3), mRNA.	NM_173515.2	7.78	6.65	-1.13	10
ILMN_1743663	POMT1	protein-O-mannosyltransferase 1 (POMT1), mRNA.	NM_007171.2	9.87	9.01	-0.85	10
ILMN_2213297	C11orf54	chromosome 11 open reading frame 54 (C11orf54), mRNA.	NM_014039.2	10.74	9.59	-1.15	10
ILMN_1798360	CXCR7	chemokine (C-X-C motif) receptor 7 (CXCR7), mRNA.	NM_020311.2	12.5	13.5	1	10
ILMN_1756705	CHTF18	CTF18, chromosome transmission fidelity factor 18 homolog (S. cerevisiae) (CHTF18), mRNA.	NM_022092.1	8.12	6.9	-1.23	9.99
ILMN_1690125	PDLIM7	PDZ and LIM domain 7 (enigma) (PDLIM7), transcript variant 4, mRNA.	NM_213636.1	7.44	8.68	1.23	9.99
ILMN_1737205	MCM4	minichromosome maintenance complex component 4 (MCM4), transcript variant 1, mRNA.	NM_005914.2	11.69	10.72	-0.97	9.98
ILMN_2338323	CDC25B	cell division cycle 25 homolog B (S. pombe) (CDC25B), transcript variant 2, mRNA.	NM_004358.3	10.6	9.52	-1.08	9.97
ILMN_1670490	PDPN	podoplanin (PDPN), transcript variant 4, mRNA.	NM_001006625.1	6.38	7.48	1.09	9.97
ILMN_1726288	TMEM106B	transmembrane protein 106B (TMEM106B), mRNA.	NM_018374.2	8.59	7.3	-1.29	9.95
ILMN_1772702	SFRS2B	splicing factor, arginine/serine-rich 2B (SFRS2B), mRNA.	NM_032102.2	10.65	11.58	0.93	9.94
ILMN_1660635	LACTB2	lactamase, beta 2 (LACTB2), mRNA.	NM_016027.1	9	9.98	0.98	9.93
ILMN_1722206	MAF	v-maf musculoaponeurotic fibrosarcoma oncogene homolog (avian) (MAF), transcript variant 2, mRNA.	NM_001031804.1	6.61	7.74	1.13	9.92
ILMN_1771026	GARS	glycyl-tRNA synthetase (GARS), mRNA.	NM_002047.2	11.38	12.37	0.98	9.92
ILMN_1681252	C17orf44	chromosome 17 open reading frame 44 (C17orf44), mRNA.	NM_173621.1	8.38	7.18	-1.2	9.91
ILMN_1651776	FHOD1	formin homology 2 domain containing 1 (FHOD1), mRNA.	NM_013241.2	8.02	8.91	0.88	9.91
ILMN_1658143	RFC3	replication factor C (activator 1) 3, 38kDa (RFC3), transcript variant 1, mRNA.	NM_002915.3	8.67	7.41	-1.26	9.89
ILMN_1751465	BNC1	basonuclin 1 (BNC1), mRNA.	NM_001717.2	8.85	10.02	1.17	9.89
ILMN_1674344	PARD6G	par-6 partitioning defective 6 homolog gamma (C. elegans) (PARD6G), mRNA.	NM_032510.3	8.99	10.09	1.1	9.88
ILMN_1677693	GPR109B	G protein-coupled receptor 109B (GPR109B), mRNA.	NM_006018.1	8.28	7.16	-1.13	9.87
ILMN_1722981	TLR5	toll-like receptor 5 (TLR5), mRNA.	NM_003268.4	8.4	7.32	-1.08	9.85
ILMN_1702933	ADM2	adrenomedullin 2 (ADM2), mRNA.	NM_024866.4	7.25	8.29	1.03	9.85
ILMN_1872032		AGENCOURT_10400346 NIH_MGC_82 cDNA clone IMAGE:6616124 5, mRNA sequence		8.51	9.34	0.82	9.84
ILMN_1679093	ZNF581	zinc finger protein 581 (ZNF581), mRNA.	NM_016535.3	10.36	9.55	-0.81	9.82
ILMN_1694177	PCNA	proliferating cell nuclear antigen (PCNA), transcript variant 2, mRNA.	NM_182649.1	12.27	11.2	-1.07	9.81
ILMN_1693912	SLC47A2	solute carrier family 47, member 2 (SLC47A2), transcript variant 1, mRNA.	NM_152908.3	11.68	10.51	-1.16	9.81
ILMN_1674706	MTHFD2	methylenetetrahydrofolate dehydrogenase (NADP+ dependent) 2, methenyltetrahydrofolate cyclohydrolase (MTHFD2), nuclear gene encoding mitochondrial protein, transcript variant 1, mRNA.	NM_006636.3	7.61	8.92	1.3	9.81
ILMN_1827562		cDNA FLJ42786 fis, clone BRAWH3006761		7.09	8.17	1.08	9.8
ILMN_1761762	C6orf141	chromosome 6 open reading frame 141 (C6orf141), mRNA.	NM_153344.1	7.97	9.32	1.35	9.79
ILMN_1750748	MGC102966	PREDICTED: similar to Keratin, type I cytoskeletal 16 (Cytokeratin-16) (CK-16) (Keratin-16) (K16) (MGC102966), misc RNA.	XR_015970.1	10.6	11.83	1.23	9.78
ILMN_1785618	SMTN	smoothelin (SMTN), transcript variant 3, mRNA.	NM_006932.3	7.35	8.51	1.16	9.78
ILMN_1672605	C7orf41	chromosome 7 open reading frame 41 (C7orf41), mRNA.	NM_152793.2	8.5	9.47	0.97	9.75
ILMN_1774161	ARL15	ADP-ribosylation factor-like 15 (ARL15), mRNA.	NM_019087.1	6.76	7.76	1	9.74
ILMN_2397028	SERPINB8	serpin peptidase inhibitor, clade B (ovalbumin), member 8 (SERPINB8), transcript variant 1, mRNA.	NM_002640.3	8.89	9.87	0.98	9.74
ILMN_1666306	SRRD	SRR1 domain containing (SRRD), mRNA.	NM_001013694.2	7.43	8.5	1.08	9.73
ILMN_1898692		602976638F1 NIH_MGC_12 cDNA clone IMAGE:5115800 5, mRNA sequence		7.24	5.88	-1.36	9.72
ILMN_1662364	AARS	alanyl-tRNA synthetase (AARS), mRNA.	NM_001605.2	12.39	13.15	0.76	9.72
ILMN_1670111	CDKN2B	cyclin-dependent kinase inhibitor 2B (p15, inhibits CDK4) (CDKN2B), transcript variant 2, mRNA.	NM_078487.2	6.74	8.03	1.29	9.71
ILMN_1660723	RDH13	retinol dehydrogenase 13 (all-trans/9-cis) (RDH13), mRNA.	NM_138412.2	8.45	7.54	-0.91	9.7
ILMN_1675048	IGF1R	insulin-like growth factor 1 receptor (IGF1R), mRNA.	NM_000875.2	7.13	8.22	1.09	9.7
ILMN_1737993	ERBB3	v-erb-b2 erythroblastic leukemia viral oncogene homolog 3 (avian) (ERBB3), transcript variant s, mRNA.	NM_001005915.1	8.86	7.52	-1.34	9.68
ILMN_1898059		BX112190 Soares_NFL_T_GBC_S1 cDNA clone IMAGp998F024129, mRNA sequence		7.99	6.74	-1.24	9.68
ILMN_1665792	ITGA2	integrin, alpha 2 (CD49B, alpha 2 subunit of VLA-2 receptor) (ITGA2), mRNA.	NM_002203.3	10.59	11.79	1.2	9.68
ILMN_1666819	PHLDB1	pleckstrin homology-like domain, family B, member 1 (PHLDB1), mRNA.	NM_015157.1	11.53	12.44	0.91	9.68
ILMN_1706021	TMPRSS4	transmembrane protease, serine 4 (TMPRSS4), transcript variant 1, mRNA.	NM_019894.2	8.76	7.52	-1.24	9.67
ILMN_1710644	MARVELD3	MARVEL domain containing 3 (MARVELD3), transcript variant 1, mRNA.	NM_001017967.2	9.68	8.84	-0.84	9.67
ILMN_1683859	SLC7A1	solute carrier family 7 (cationic amino acid transporter, y+ system), member 1 (SLC7A1), mRNA.	NM_003045.3	12.66	13.35	0.69	9.67
ILMN_1693090	CROT	carnitine O-octanoyltransferase (CROT), mRNA.	NM_021151.2	10.61	9.49	-1.12	9.65
ILMN_1904628		PM0-ST0264-161199-001-b06 ST0264 cDNA, mRNA sequence		7.92	6.82	-1.1	9.63
ILMN_2091347	IDH1	isocitrate dehydrogenase 1 (NADP+), soluble (IDH1), mRNA.	NM_005896.2	11.86	11.04	-0.83	9.63
ILMN_1675483	ANKMY1	ankyrin repeat and MYND domain containing 1 (ANKMY1), transcript variant 2, mRNA.	NM_017844.2	8.77	7.68	-1.09	9.63
ILMN_2050790	C11orf52	chromosome 11 open reading frame 52 (C11orf52), mRNA.	NM_080659.1	8.06	6.83	-1.23	9.63
ILMN_1660691	RAB31	RAB31, member RAS oncogene family (RAB31), mRNA.	NM_006868.2	9.96	10.85	0.89	9.63
ILMN_1734734	ZNF519	zinc finger protein 519 (ZNF519), mRNA.	NM_145287.2	9.14	8.2	-0.94	9.61
ILMN_1752478	DHRS3	dehydrogenase/reductase (SDR family) member 3 (DHRS3), mRNA.	NM_004753.4	11.93	10.84	-1.09	9.57
ILMN_1810725	FAM129A	family with sequence similarity 129, member A (FAM129A), transcript variant 2, mRNA.	NM_052966.2	11.5	12.64	1.13	9.55
ILMN_1802205	RHOB	ras homolog gene family, member B (RHOB), mRNA.	NM_004040.2	6.77	8.06	1.3	9.55
ILMN_2367258	SMOX	spermine oxidase (SMOX), transcript variant 2, mRNA.	NM_175840.1	7	7.91	0.91	9.55
ILMN_1712916	MGC45800	PREDICTED: hypothetical protein LOC90768 (MGC45800), misc RNA.	XR_017780.1	6.16	7.23	1.08	9.54
ILMN_1809931	NDRG1	N-myc downstream regulated gene 1 (NDRG1), mRNA.	NM_006096.2	10.68	11.54	0.86	9.53
ILMN_1719998	C9orf45	PREDICTED: chromosome 9 open reading frame 45 (C9orf45), misc RNA.	XR_017862.1	8.73	7.82	-0.91	9.52
ILMN_1775182	GSR	glutathione reductase (GSR), mRNA.	NM_000637.2	9.11	8.09	-1.02	9.52
ILMN_2397954	PARP3	poly (ADP-ribose) polymerase family, member 3 (PARP3), transcript variant 2, mRNA.	NM_005485.3	8.42	7.45	-0.97	9.52
ILMN_2262044	PARP10	poly (ADP-ribose) polymerase family, member 10 (PARP10), mRNA.	NM_032789.1	8.25	7.05	-1.2	9.5
ILMN_1794539	KIF11	kinesin family member 11 (KIF11), mRNA.	NM_004523.2	8.45	7.46	-0.99	9.5
ILMN_2232463	ARL14	ADP-ribosylation factor-like 14 (ARL14), mRNA.	NM_025047.1	10.95	9.67	-1.27	9.49
ILMN_1750497	GPR109A	G protein-coupled receptor 109A (GPR109A), mRNA.	NM_177551.3	8.74	7.46	-1.28	9.46
ILMN_1752249	FAM38A	family with sequence similarity 38, member A (FAM38A), mRNA.	NM_014745.1	10.39	11.6	1.21	9.46
ILMN_1781373	IFIH1	interferon induced with helicase C domain 1 (IFIH1), mRNA.	NM_022168.2	8.44	7.22	-1.22	9.43
ILMN_1685170	ANXA11	annexin A11 (ANXA11), transcript variant a, mRNA.	NM_001157.2	11.99	10.97	-1.02	9.42
ILMN_1777170	LOC440585	PREDICTED: hypothetical LOC440585, transcript variant 3 (LOC440585), mRNA.	XM_942137.2	9.78	8.79	-0.99	9.41
ILMN_1730007	MPZL2	myelin protein zero-like 2 (MPZL2), transcript variant 2, mRNA.	NM_144765.1	10.81	9.87	-0.94	9.41
ILMN_1902308		AGENCOURT_13567612 NIH_MGC_184 cDNA clone IMAGE:30326575 5, mRNA sequence		9.93	11.04	1.11	9.41
ILMN_1760201	DNMT1	DNA (cytosine-5-)-methyltransferase 1 (DNMT1), mRNA.	NM_001379.1	12.46	11.67	-0.79	9.39
ILMN_1701613	RARRES3	retinoic acid receptor responder (tazarotene induced) 3 (RARRES3), mRNA.	NM_004585.3	8.15	6.74	-1.41	9.39
ILMN_2310296	C21orf58	chromosome 21 open reading frame 58 (C21orf58), transcript variant 2, mRNA.	NM_199071.2	8.78	7.62	-1.17	9.39
ILMN_1809477	CARHSP1	calcium regulated heat stable protein 1, 24kDa (CARHSP1), transcript variant 2, mRNA.	NM_001042476.1	12	11.17	-0.82	9.37
ILMN_2102670	GATA2	GATA binding protein 2 (GATA2), mRNA.	NM_032638.3	7.83	6.83	-1.01	9.36
ILMN_1766657	STOM	stomatin (STOM), transcript variant 1, mRNA.	NM_004099.4	7.84	8.97	1.13	9.36
ILMN_1803194	GALK1	galactokinase 1 (GALK1), mRNA.	NM_000154.1	9.49	8.83	-0.67	9.35
ILMN_1673649	HYOU1	hypoxia up-regulated 1 (HYOU1), mRNA.	NM_006389.2	7.38	8.44	1.06	9.32
ILMN_1718866	MGC23985	similar to AVLV472 (MGC23985), mRNA.	NM_206966.2	5.98	7.04	1.07	9.32
ILMN_1746396	CTNNB1	catenin (cadherin-associated protein), beta 1, 88kDa (CTNNB1), mRNA.	NM_001098209.1	8.4	9.33	0.93	9.32
ILMN_1692056	HS3ST3A1	heparan sulfate (glucosamine) 3-O-sulfotransferase 3A1 (HS3ST3A1), mRNA.	NM_006042.1	5.78	6.93	1.15	9.32
ILMN_1684183	RAD9A	RAD9 homolog A (S. pombe) (RAD9A), mRNA.	NM_004584.2	9.02	8.01	-1	9.31
ILMN_1740903	C7orf49	chromosome 7 open reading frame 49 (C7orf49), mRNA.	NM_024033.1	8.29	9.33	1.04	9.31
ILMN_1651365	ZBED2	zinc finger, BED-type containing 2 (ZBED2), mRNA.	NM_024508.3	10.7	11.56	0.86	9.29
ILMN_1670807	FAM84B	family with sequence similarity 84, member B (FAM84B), mRNA.	NM_174911.3	10.83	9.87	-0.96	9.28
ILMN_2405680	CRB3	crumbs homolog 3 (Drosophila) (CRB3), transcript variant 3, mRNA.	NM_174881.2	9.96	9.19	-0.77	9.27
ILMN_1718387	LOR	loricrin (LOR), mRNA.	NM_000427.1	6.26	7.27	1.01	9.27
ILMN_2048982	ZBTB25	zinc finger and BTB domain containing 25 (ZBTB25), mRNA.	NM_006977.2	9.05	8.06	-0.98	9.26
ILMN_1739161	PPAP2A	phosphatidic acid phosphatase type 2A (PPAP2A), transcript variant 1, mRNA.	NM_003711.2	8	8.93	0.93	9.25
ILMN_2368721	CENPM	centromere protein M (CENPM), transcript variant 2, mRNA.	NM_001002876.1	7.12	6.24	-0.88	9.24
ILMN_1684571	RSPH1	radial spoke head 1 homolog (Chlamydomonas) (RSPH1), mRNA.	NM_080860.2	7.35	6.24	-1.11	9.24
ILMN_1695829	TTYH2	tweety homolog 2 (Drosophila) (TTYH2), transcript variant 1, mRNA.	NM_032646.5	7.15	6.17	-0.98	9.24
ILMN_1814790	SHANK2	SH3 and multiple ankyrin repeat domains 2 (SHANK2), transcript variant 1, mRNA.	NM_012309.1	6.03	7.12	1.09	9.24
ILMN_1759184	C19orf48	chromosome 19 open reading frame 48 (C19orf48), mRNA.	NM_199250.1	10.84	10.01	-0.83	9.23
ILMN_1656111	MYLIP	myosin regulatory light chain interacting protein (MYLIP), mRNA.	NM_013262.3	10.18	9.35	-0.83	9.23
ILMN_1779374	AMMECR1	Alport syndrome, mental retardation, midface hypoplasia and elliptocytosis chromosomal region, gene 1 (AMMECR1), transcript variant 1, mRNA.	NM_015365.2	8.24	9.28	1.03	9.23
ILMN_1700831	SLC27A2	solute carrier family 27 (fatty acid transporter), member 2 (SLC27A2), mRNA.	NM_003645.2	9.73	8.86	-0.88	9.22
ILMN_1667966	C1orf24	chromosome 1 open reading frame 24 (C1orf24), transcript variant 2, mRNA.	NM_052966.1	12.2	13.14	0.94	9.22
ILMN_1766539	LOC643319	PREDICTED: similar to Transgelin-2 (LOC643319), mRNA.	XM_927980.1	8.28	9.29	1	9.21
ILMN_1773760	PAICS	phosphoribosylaminoimidazole carboxylase, phosphoribosylaminoimidazole succinocarboxamide synthetase (PAICS), transcript variant 2, mRNA.	NM_006452.3	10.67	9.85	-0.82	9.2
ILMN_1701655	SLC24A6	solute carrier family 24 (sodium/potassium/calcium exchanger), member 6 (SLC24A6), mRNA.	NM_024959.2	10.18	9.45	-0.73	9.19
ILMN_1775016	MPZL2	myelin protein zero-like 2 (MPZL2), transcript variant 2, mRNA.	NM_144765.1	10.49	9.65	-0.85	9.18
ILMN_2403247	CMTM7	CKLF-like MARVEL transmembrane domain containing 7 (CMTM7), transcript variant 2, mRNA.	NM_181472.1	7.22	8.4	1.18	9.18
ILMN_1748241	CENPP	centromere protein P (CENPP), mRNA.	NM_001012267.1	7.07	6.2	-0.86	9.17
ILMN_2239754	IFIT3	interferon-induced protein with tetratricopeptide repeats 3 (IFIT3), mRNA.	NM_001549.2	8.56	7.07	-1.49	9.17
ILMN_1713892	C4orf34	chromosome 4 open reading frame 34 (C4orf34), mRNA.	NM_174921.1	11.22	10.43	-0.79	9.14
ILMN_1691376	JAG1	jagged 1 (Alagille syndrome) (JAG1), mRNA.	NM_000214.1	10.8	11.52	0.73	9.14
ILMN_2319000	MATK	megakaryocyte-associated tyrosine kinase (MATK), transcript variant 3, mRNA.	NM_139354.2	8.26	7.24	-1.02	9.13
ILMN_2355831	FHL2	four and a half LIM domains 2 (FHL2), transcript variant 2, mRNA.	NM_201555.1	12.32	13.12	0.8	9.13
ILMN_1788108	TXNDC5	thioredoxin domain containing 5 (TXNDC5), transcript variant 1, mRNA.	NM_030810.2	9.71	10.43	0.71	9.13
ILMN_1657796	STMN1	stathmin 1/oncoprotein 18 (STMN1), transcript variant 1, mRNA.	NM_203401.1	10.01	8.9	-1.11	9.12
ILMN_1654609	TIGA1	TIGA1 (TIGA1), mRNA.	NM_053000.1	12.44	11.76	-0.69	9.1
ILMN_2149494	NPL	N-acetylneuraminate pyruvate lyase (dihydrodipicolinate synthase) (NPL), mRNA.	NM_030769.1	8.36	7.25	-1.11	9.07
ILMN_1662640	C20orf127	chromosome 20 open reading frame 127 (C20orf127), mRNA.	NM_080757.1	11.09	10.16	-0.93	9.06
ILMN_1664630	CHEK1	CHK1 checkpoint homolog (S. pombe) (CHEK1), mRNA.	NM_001274.3	9.78	8.71	-1.07	9.06
ILMN_1659142	MDK	midkine (neurite growth-promoting factor 2) (MDK), transcript variant 2, mRNA.	NM_001012333.1	7.29	6.1	-1.2	9.06
ILMN_1900520		602659965F1 NCI_CGAP_Skn3 cDNA clone IMAGE:4802969 5, mRNA sequence		9.58	10.46	0.88	9.05
ILMN_1801313	SIAH2	seven in absentia homolog 2 (Drosophila) (SIAH2), mRNA.	NM_005067.5	7.38	8.56	1.18	9.05
ILMN_2219131	RPS15	ribosomal protein S15 (RPS15), mRNA.	NM_001018.3	7.3	8.28	0.99	9.05
ILMN_1815130	MICALL1	MICAL-like 1 (MICALL1), mRNA.	NM_033386.2	8.64	9.7	1.06	9.05
ILMN_1754149	LETMD1	LETM1 domain containing 1 (LETMD1), transcript variant 2, mRNA.	NM_001024668.1	10.49	9.65	-0.84	9.02
ILMN_1711087	LOC648526	PREDICTED: similar to epiplakin 1 (LOC648526), mRNA.	XM_937579.1	8.54	9.61	1.07	9.02
ILMN_1676548	BZW2	basic leucine zipper and W2 domains 2 (BZW2), mRNA.	NM_014038.1	10.76	9.98	-0.78	9.01
ILMN_1693233	KIAA0513	KIAA0513 (KIAA0513), mRNA.	NM_014732.2	8.4	7.28	-1.12	9.01
ILMN_2311089	BRCA1	breast cancer 1, early onset (BRCA1), transcript variant BRCA1-delta11b, mRNA.	NM_007304.2	8.23	6.93	-1.3	9
ILMN_1655229	SLC7A11	solute carrier family 7, (cationic amino acid transporter, y+ system) member 11 (SLC7A11), mRNA.	NM_014331.3	6.09	7.05	0.96	9
ILMN_1761247	PIR	pirin (iron-binding nuclear protein) (PIR), transcript variant 2, mRNA.	NM_001018109.1	11.32	10.27	-1.05	8.99
ILMN_1774874	IL1RN	interleukin 1 receptor antagonist (IL1RN), transcript variant 4, mRNA.	NM_173843.1	10.25	9.29	-0.95	8.98
ILMN_1676336	AADACL1	arylacetamide deacetylase-like 1 (AADACL1), mRNA.	NM_020792.3	8.29	7.28	-1.01	8.98
ILMN_1679782	BLOC1S2	biogenesis of lysosome-related organelles complex-1, subunit 2 (BLOC1S2), transcript variant 2, mRNA.	NM_001001342.1	7.04	8	0.97	8.96
ILMN_2320513	APBB3	amyloid beta (A4) precursor protein-binding, family B, member 3 (APBB3), transcript variant 2, mRNA.	NM_133173.2	8.79	7.99	-0.8	8.93
ILMN_2131293	LOC200810	similar to beta-1,4-mannosyltransferase; beta-1,4 mannosyltransferase (LOC200810), mRNA.	NM_001015050.1	10.58	9.88	-0.7	8.92
ILMN_2383484	C19orf48	chromosome 19 open reading frame 48 (C19orf48), mRNA.	NM_199250.1	9.08	7.91	-1.17	8.89
ILMN_1766010	YARS	tyrosyl-tRNA synthetase (YARS), mRNA.	NM_003680.2	10.72	11.63	0.92	8.89
ILMN_1685427	WFDC2	WAP four-disulfide core domain 2 (WFDC2), transcript variant 3, mRNA.	NM_080733.1	6.86	6.01	-0.85	8.85
ILMN_1710937	IFI16	interferon, gamma-inducible protein 16 (IFI16), mRNA.	NM_005531.1	10.88	10.02	-0.86	8.84
ILMN_2153029	CGB	chorionic gonadotropin, beta polypeptide (CGB), mRNA.	NM_000737.2	6.18	7.09	0.91	8.84
ILMN_1688780	S100A4	S100 calcium binding protein A4 (S100A4), transcript variant 2, mRNA.	NM_019554.2	11.63	10.15	-1.48	8.83
ILMN_2079786	NUAK1	NUAK family, SNF1-like kinase, 1 (NUAK1), mRNA.	NM_014840.2	8.96	10	1.03	8.83
ILMN_1657766	TRIM29	tripartite motif-containing 29 (TRIM29), mRNA.	NM_012101.3	12.01	11.03	-0.99	8.82
ILMN_2201413	SLC37A2	solute carrier family 37 (glycerol-3-phosphate transporter), member 2 (SLC37A2), mRNA.	NM_198277.1	8.37	7.43	-0.95	8.78
ILMN_1796925	CXADR	coxsackie virus and adenovirus receptor (CXADR), mRNA.	NM_001338.3	10.56	9.6	-0.96	8.77
ILMN_2382505	SLC22A18	solute carrier family 22 (organic cation transporter), member 18 (SLC22A18), transcript variant 1, mRNA.	NM_002555.3	9.24	8.25	-0.99	8.74
ILMN_1739325	LOC284023	PREDICTED: hypothetical protein LOC284023, transcript variant 3 (LOC284023), mRNA.	XM_941810.2	9.2	8.25	-0.95	8.74
ILMN_1707464	MST1	macrophage stimulating 1 (hepatocyte growth factor-like) (MST1), mRNA.	NM_020998.2	9.93	9.01	-0.92	8.74
ILMN_1745420	PHF19	PHD finger protein 19 (PHF19), transcript variant 2, mRNA.	NM_001009936.1	8.91	7.96	-0.95	8.74
ILMN_2052717	GRAMD1C	GRAM domain containing 1C (GRAMD1C), mRNA.	NM_017577.2	6.71	5.87	-0.84	8.73
ILMN_1666444	RBMS1	RNA binding motif, single stranded interacting protein 1 (RBMS1), transcript variant 3, mRNA.	NM_002897.3	10.09	10.91	0.82	8.73
ILMN_2391512	ASAHL	N-acylsphingosine amidohydrolase (acid ceramidase)-like (ASAHL), transcript variant 1, mRNA.	NM_014435.3	8.09	7.24	-0.85	8.71
ILMN_1722089	RNF217	ring finger protein 217 (RNF217), mRNA.	NM_152553.2	7.39	8.48	1.09	8.71
ILMN_1730928	CDK5R1	cyclin-dependent kinase 5, regulatory subunit 1 (p35) (CDK5R1), mRNA.	NM_003885.2	6.46	7.5	1.05	8.71
ILMN_1690064	RUNDC2C	RUN domain containing 2C (RUNDC2C) on chromosome 16.	NR_002939.2	9.08	10.09	1.01	8.7
ILMN_1792076	TRERF1	transcriptional regulating factor 1 (TRERF1), mRNA.	NM_033502.1	8.81	7.75	-1.06	8.66
ILMN_1672295	ZC3H12A	zinc finger CCCH-type containing 12A (ZC3H12A), mRNA.	NM_025079.1	7.46	8.51	1.05	8.66
ILMN_1732187	TMEM143	transmembrane protein 143 (TMEM143), mRNA.	NM_018273.2	7.2	6.03	-1.16	8.65
ILMN_2332795	ZNF16	zinc finger protein 16 (ZNF16), transcript variant 1, mRNA.	NM_006958.2	8.43	7.58	-0.85	8.63
ILMN_2073604	EBP	emopamil binding protein (sterol isomerase) (EBP), mRNA.	NM_006579.1	10.21	11.06	0.85	8.62
ILMN_1798557	LOC202134	PREDICTED: hypothetical protein LOC202134, transcript variant 1 (LOC202134), mRNA.	XM_371783.3	7.25	6.33	-0.92	8.61
ILMN_1764571	ARHGAP23	PREDICTED: Rho GTPase activating protein 23, transcript variant 1 (ARHGAP23), mRNA.	XM_290799.7	13.63	12.9	-0.74	8.61
ILMN_1715555	DBP	D site of albumin promoter (albumin D-box) binding protein (DBP), mRNA.	NM_001352.2	7.21	6.05	-1.16	8.6
ILMN_2132809	ARHGEF10	Rho guanine nucleotide exchange factor (GEF) 10 (ARHGEF10), mRNA.	NM_014629.2	10.24	11.05	0.81	8.6
ILMN_2381257	DSC2	desmocollin 2 (DSC2), transcript variant Dsc2a, mRNA.	NM_024422.2	9.33	10.27	0.93	8.59
ILMN_1754538	C10orf58	chromosome 10 open reading frame 58 (C10orf58), mRNA.	NM_032333.4	12.29	11.39	-0.9	8.58
ILMN_2219712	HMGB2	high-mobility group box 2 (HMGB2), mRNA.	NM_002129.2	10.99	9.86	-1.12	8.58
ILMN_1738095	PER2	period homolog 2 (Drosophila) (PER2), mRNA.	NM_022817.2	10.19	9.33	-0.87	8.56
ILMN_1777113	NEURL2	neuralized homolog 2 (Drosophila) (NEURL2), mRNA.	NM_080749.2	7.2	6.24	-0.96	8.56
ILMN_1666546	DUSP14	dual specificity phosphatase 14 (DUSP14), mRNA.	NM_007026.2	10.51	11.49	0.98	8.56
ILMN_1679176	CLCA4	chloride channel, calcium activated, family member 4 (CLCA4), mRNA.	NM_012128.2	8.32	6.88	-1.44	8.55
ILMN_1773154	NFKBIA	nuclear factor of kappa light polypeptide gene enhancer in B-cells inhibitor, alpha (NFKBIA), mRNA.	NM_020529.1	12.37	11.45	-0.92	8.54
ILMN_1892548		602572519F1 NIH_MGC_77 cDNA clone IMAGE:4700548 5, mRNA sequence		5.98	7.18	1.2	8.54
ILMN_1719599	SYTL4	synaptotagmin-like 4 (granuphilin-a) (SYTL4), mRNA.	NM_080737.1	9.37	8.25	-1.13	8.53
ILMN_1804834	C6orf130	chromosome 6 open reading frame 130 (C6orf130), mRNA.	NM_145063.2	10.13	9.32	-0.8	8.53
ILMN_1782305	NR4A2	nuclear receptor subfamily 4, group A, member 2 (NR4A2), transcript variant 1, mRNA.	NM_006186.2	8.65	7.69	-0.96	8.52
ILMN_1657361	CBX7	chromobox homolog 7 (CBX7), mRNA.	NM_175709.2	8.46	7.31	-1.15	8.49
ILMN_1739541	NMI	N-myc (and STAT) interactor (NMI), mRNA.	NM_004688.1	10.14	9.27	-0.88	8.49
ILMN_1705442	CMTM3	CKLF-like MARVEL transmembrane domain containing 3 (CMTM3), transcript variant 1, mRNA.	NM_144601.2	9.09	9.91	0.82	8.49
ILMN_2374340	PLAUR	plasminogen activator, urokinase receptor (PLAUR), transcript variant 2, mRNA.	NM_001005376.1	7.47	8.44	0.97	8.49
ILMN_2044813	TUBB2A	tubulin, beta 2A (TUBB2A), mRNA.	NM_001069.2	6.43	7.49	1.06	8.49
ILMN_1715189	LHX6	LIM homeobox 6 (LHX6), transcript variant 2, mRNA.	NM_199160.2	6.6	5.65	-0.95	8.48
ILMN_2063586	CLIC4	chloride intracellular channel 4 (CLIC4), nuclear gene encoding mitochondrial protein, mRNA.	NM_013943.1	9.66	10.71	1.05	8.47
ILMN_1723467	ITGB1	integrin, beta 1 (fibronectin receptor, beta polypeptide, antigen CD29 includes MDF2, MSK12) (ITGB1), transcript variant 1A, mRNA.	NM_002211.2	12.3	13.05	0.75	8.47
ILMN_1773413	DOCK9	dedicator of cytokinesis 9 (DOCK9), mRNA.	NM_015296.1	7.87	8.82	0.95	8.46
ILMN_2257432	RAD51	RAD51 homolog (RecA homolog, E. coli) (S. cerevisiae) (RAD51), transcript variant 1, mRNA.	NM_002875.2	8.25	7.14	-1.11	8.45
ILMN_1815169	MCM5	minichromosome maintenance complex component 5 (MCM5), mRNA.	NM_006739.3	9.09	8.2	-0.89	8.42
ILMN_2148913	TMEM45A	transmembrane protein 45A (TMEM45A), mRNA.	NM_018004.1	9.05	10.22	1.16	8.42
ILMN_1653161	SNCG	synuclein, gamma (breast cancer-specific protein 1) (SNCG), mRNA.	NM_003087.1	8.85	7.72	-1.13	8.4
ILMN_2173291	CYP4B1	cytochrome P450, family 4, subfamily B, polypeptide 1 (CYP4B1), mRNA.	NM_000779.2	6.69	5.82	-0.87	8.38
ILMN_1752932	MPZL2	myelin protein zero-like 2 (MPZL2), transcript variant 1, mRNA.	NM_005797.2	12.64	11.86	-0.79	8.38
ILMN_1755075	IDI1	isopentenyl-diphosphate delta isomerase 1 (IDI1), mRNA.	NM_004508.2	9.42	10.99	1.57	8.37
ILMN_2097997	IFNE1	interferon epsilon 1 (IFNE1), mRNA.	NM_176891.3	6.52	7.64	1.12	8.37
ILMN_2380566	SIAH1	seven in absentia homolog 1 (Drosophila) (SIAH1), transcript variant 2, mRNA.	NM_001006610.1	9.26	10.01	0.75	8.37
ILMN_2305721	POMT1	protein-O-mannosyltransferase 1 (POMT1), transcript variant 1, mRNA.	NM_007171.3	9.08	8.31	-0.77	8.35
ILMN_1658569	LOC728910	PREDICTED: similar to Galectin-7 (Gal-7) (HKL-14) (PI7) (p53-induced protein 1) (LOC728910), mRNA.	XM_001128786.1	12.29	13.11	0.83	8.35
ILMN_1757298	BTBD7	BTB (POZ) domain containing 7 (BTBD7), transcript variant 2, mRNA.	NM_018167.3	7.76	8.64	0.88	8.35
ILMN_1697710	IL1F7	interleukin 1 family, member 7 (zeta) (IL1F7), transcript variant 1, mRNA.	NM_014439.3	8.55	7.61	-0.94	8.33
ILMN_1750234	PRSS2	protease, serine, 2 (trypsin 2) (PRSS2), transcript variant 1, mRNA.	NM_002770.2	6.31	7.34	1.02	8.32
ILMN_1746085	IGFBP3	insulin-like growth factor binding protein 3 (IGFBP3), transcript variant 2, mRNA.	NM_000598.4	11.93	11.24	-0.69	8.29
ILMN_1670539	LOC92017	similar to RIKEN cDNA 4933437K13 (LOC92017), mRNA.	NM_001009607.1	7.85	8.71	0.86	8.28
ILMN_1729987	SRC	v-src sarcoma (Schmidt-Ruppin A-2) viral oncogene homolog (avian) (SRC), transcript variant 2, mRNA.	NM_198291.1	8.78	9.73	0.94	8.27
ILMN_2172174	NP	nucleoside phosphorylase (NP), mRNA.	NM_000270.1	9.62	10.5	0.88	8.27
ILMN_1758719	NEDD9	neural precursor cell expressed, developmentally down-regulated 9 (NEDD9), transcript variant 1, mRNA.	NM_006403.2	7.24	8.28	1.04	8.26
ILMN_2153332	ATXN1	ataxin 1 (ATXN1), mRNA.	NM_000332.2	8.67	9.8	1.13	8.26
ILMN_1695606	EFNB3	ephrin-B3 (EFNB3), mRNA.	NM_001406.3	7.02	6.12	-0.91	8.25
ILMN_1657996	LOC642035	PREDICTED: hypothetical protein LOC642035 (LOC642035), mRNA.	XM_936105.1	6.99	8.06	1.07	8.25
ILMN_1678934	POLR1E	polymerase (RNA) I polypeptide E, 53kDa (POLR1E), mRNA.	NM_022490.1	8.09	7.06	-1.02	8.24
ILMN_1677843	RAB24	RAB24, member RAS oncogene family (RAB24), transcript variant 1, mRNA.	NM_001031677.2	8.45	7.27	-1.18	8.24
ILMN_2383934	ITGB1	integrin, beta 1 (fibronectin receptor, beta polypeptide, antigen CD29 includes MDF2, MSK12) (ITGB1), transcript variant 1C-2, mRNA.	NM_033669.1	12.3	13.19	0.89	8.24
ILMN_1670385	TUBAL3	tubulin, alpha-like 3 (TUBAL3), mRNA.	NM_024803.1	6.7	5.87	-0.83	8.23
ILMN_1712400	SERPINB6	serpin peptidase inhibitor, clade B (ovalbumin), member 6 (SERPINB6), mRNA.	NM_004568.4	12.58	11.98	-0.6	8.22
ILMN_2392274	CD82	CD82 molecule (CD82), transcript variant 2, mRNA.	NM_001024844.1	9.4	8.26	-1.14	8.21
ILMN_1655348	GPR1	G protein-coupled receptor 1 (GPR1), transcript variant 2, mRNA.	NM_001098199.1	7.18	6.25	-0.92	8.2
ILMN_1707720	SLC1A5	solute carrier family 1 (neutral amino acid transporter), member 5 (SLC1A5), mRNA.	NM_005628.1	9.64	10.48	0.84	8.2
ILMN_1806651	PARP8	poly (ADP-ribose) polymerase family, member 8 (PARP8), mRNA.	NM_024615.2	8.74	9.9	1.16	8.19
ILMN_2361603	NDRG2	NDRG family member 2 (NDRG2), transcript variant 6, mRNA.	NM_201539.1	8.51	7.56	-0.95	8.18
ILMN_1674983	LOC387841	PREDICTED: similar to ribosomal protein L13a, transcript variant 2 (LOC387841), mRNA.	XM_932678.1	9.88	10.81	0.93	8.18
ILMN_1761425	OLFML2A	olfactomedin-like 2A (OLFML2A), mRNA.	NM_182487.2	11.66	10.82	-0.84	8.17
ILMN_1800311	HSF2	heat shock transcription factor 2 (HSF2), mRNA.	NM_004506.2	7.78	6.9	-0.88	8.16
ILMN_1813456	PCBD1	6-pyruvoyl-tetrahydropterin synthase/dimerization cofactor of hepatocyte nuclear factor 1 alpha (TCF1) (PCBD1), transcript variant 2, mRNA.	NM_001001939.1	9.72	8.9	-0.83	8.15
ILMN_1696266	XRCC3	X-ray repair complementing defective repair in Chinese hamster cells 3 (XRCC3), transcript variant 3, mRNA.	NM_001100118.1	7.13	6.25	-0.88	8.15
ILMN_1747775	STX2	syntaxin 2 (STX2), transcript variant 2, mRNA.	NM_194356.1	8.09	9.01	0.92	8.15
ILMN_1799467	SAMD9L	sterile alpha motif domain containing 9-like (SAMD9L), mRNA.	NM_152703.2	6.89	5.81	-1.08	8.14
ILMN_1762308	LOC654191	PREDICTED: similar to similar to RIKEN cDNA 4933437K13 (LOC654191), mRNA.	XM_940642.1	8.75	9.69	0.94	8.14
ILMN_1781565	MESDC1	mesoderm development candidate 1 (MESDC1), mRNA.	NM_022566.1	6.61	7.54	0.93	8.14
ILMN_1814194	TCF4	transcription factor 4 (TCF4), transcript variant 2, mRNA.	NM_003199.2	8.03	8.99	0.96	8.14
ILMN_1759513	RND3	Rho family GTPase 3 (RND3), mRNA.	NM_005168.3	9.58	10.62	1.04	8.13
ILMN_1756204	RPS6KA4	ribosomal protein S6 kinase, 90kDa, polypeptide 4 (RPS6KA4), transcript variant 2, mRNA.	NM_001006944.1	8.22	9.16	0.94	8.13
ILMN_1679995	MPP6	membrane protein, palmitoylated 6 (MAGUK p55 subfamily member 6) (MPP6), mRNA.	NM_016447.2	7.94	8.76	0.82	8.13
ILMN_1698072	PITRM1	pitrilysin metallopeptidase 1 (PITRM1), mRNA.	NM_014889.2	9.13	10.03	0.89	8.13
ILMN_1696585	FERMT1	fermitin family homolog 1 (Drosophila) (FERMT1), mRNA.	NM_017671.4	11.38	12.28	0.9	8.12
ILMN_1732171	LOC652685	PREDICTED: similar to PMS1 protein homolog 2 (DNA mismatch repair protein PMS2) (LOC652685), mRNA.	XM_942289.1	10.2	9.55	-0.65	8.11
ILMN_1740571	LOC647859	PREDICTED: similar to Occludin (LOC647859), mRNA.	XM_001130815.1	8.73	7.81	-0.92	8.09
ILMN_1800958	ALS2CR4	amyotrophic lateral sclerosis 2 (juvenile) chromosome region, candidate 4 (ALS2CR4), transcript variant 1, mRNA.	NM_001044385.1	10.06	10.8	0.74	8.07
ILMN_2206722	FER1L4	fer-1-like 4 (C. elegans) (FER1L4) on chromosome 20.	NR_001442.2	7.45	6.6	-0.85	8.06
ILMN_1694840	MATN2	matrilin 2 (MATN2), transcript variant 1, mRNA.	NM_002380.3	12.3	11.47	-0.84	8.06
ILMN_1676528	BTN3A2	butyrophilin, subfamily 3, member A2 (BTN3A2), mRNA.	NM_007047.3	7.37	6.16	-1.21	8.05
ILMN_1765641	SEMA3A	sema domain, immunoglobulin domain (Ig), short basic domain, secreted, (semaphorin) 3A (SEMA3A), mRNA.	NM_006080.2	8.72	7.77	-0.95	8.05
ILMN_2337058	PORCN	porcupine homolog (Drosophila) (PORCN), transcript variant A, mRNA.	NM_022825.2	7.08	8.39	1.31	8.05
ILMN_1796642	NCF2	neutrophil cytosolic factor 2 (65kDa, chronic granulomatous disease, autosomal 2) (NCF2), mRNA.	NM_000433.2	7.41	6.24	-1.17	8.04
ILMN_2115340	HIST2H4A	histone cluster 2, H4a (HIST2H4A), mRNA.	NM_003548.2	10.49	9.51	-0.98	8.03
ILMN_1755834	FEN1	flap structure-specific endonuclease 1 (FEN1), mRNA.	NM_004111.4	9.51	8.52	-1	8.02
ILMN_2397627	UPF3B	UPF3 regulator of nonsense transcripts homolog B (yeast) (UPF3B), transcript variant 1, mRNA.	NM_080632.1	9.82	8.95	-0.87	8.02
ILMN_1798659	CCDC28A	coiled-coil domain containing 28A (CCDC28A), mRNA.	NM_015439.2	10.65	9.86	-0.79	8
ILMN_1764619	FLJ45244	FLJ45244 protein (FLJ45244), mRNA.	NM_207443.1	8.4	7.26	-1.14	7.99
ILMN_1711005	CDC25A	cell division cycle 25 homolog A (S. pombe) (CDC25A), transcript variant 1, mRNA.	NM_001789.2	7.38	6.51	-0.87	7.99
ILMN_1759676	HOXC13	homeobox C13 (HOXC13), mRNA.	NM_017410.2	11.52	10.66	-0.86	7.98
ILMN_1782439	CNN3	calponin 3, acidic (CNN3), mRNA.	NM_001839.2	10.96	11.71	0.75	7.98
ILMN_1717714	CDKN2A	cyclin-dependent kinase inhibitor 2A (melanoma, p16, inhibits CDK4) (CDKN2A), transcript variant 1, mRNA.	NM_000077.3	7.74	8.81	1.07	7.98
ILMN_1664912	IL11RA	interleukin 11 receptor, alpha (IL11RA), transcript variant 1, mRNA.	NM_004512.3	10.57	9.74	-0.83	7.96
ILMN_1674629	C9orf3	chromosome 9 open reading frame 3 (C9orf3), mRNA.	NM_032823.3	9.38	10.26	0.89	7.96
ILMN_2388800	PPAP2B	phosphatidic acid phosphatase type 2B (PPAP2B), transcript variant 1, mRNA.	NM_003713.3	8.63	9.38	0.75	7.96
ILMN_1802615	CDK6	cyclin-dependent kinase 6 (CDK6), mRNA.	NM_001259.5	9.98	10.64	0.66	7.96
ILMN_2396947	PSMC3IP	PSMC3 interacting protein (PSMC3IP), transcript variant 2, mRNA.	NM_016556.1	7.91	6.69	-1.22	7.95
ILMN_1695058	SLC38A5	solute carrier family 38, member 5 (SLC38A5), mRNA.	NM_033518.1	7.72	9.06	1.34	7.95
ILMN_2367681	SPAG1	sperm associated antigen 1 (SPAG1), transcript variant 1, mRNA.	NM_003114.3	7.98	9.16	1.18	7.95
ILMN_2173975	RTP4	receptor (chemosensory) transporter protein 4 (RTP4), mRNA.	NM_022147.2	7.16	6.23	-0.93	7.94
ILMN_1694847	TERF1	telomeric repeat binding factor (NIMA-interacting) 1 (TERF1), transcript variant 1, mRNA.	NM_017489.1	8.59	7.74	-0.85	7.94
ILMN_1723884	ARF4	ADP-ribosylation factor 4 (ARF4), mRNA.	NM_001660.2	8.2	9.14	0.94	7.94
ILMN_1695404	LY6E	lymphocyte antigen 6 complex, locus E (LY6E), mRNA.	NM_002346.1	9.79	8.64	-1.15	7.93
ILMN_1655429	TNFAIP1	tumor necrosis factor, alpha-induced protein 1 (endothelial) (TNFAIP1), mRNA.	NM_021137.3	9.11	10.07	0.96	7.93
ILMN_1709067	SAMD11	sterile alpha motif domain containing 11 (SAMD11), mRNA.	NM_152486.2	6.09	7.08	0.98	7.92
ILMN_1704063	KCNH3	potassium voltage-gated channel, subfamily H (eag-related), member 3 (KCNH3), mRNA.	NM_012284.1	7.39	6.49	-0.89	7.91
ILMN_1775268	HECW2	HECT, C2 and WW domain containing E3 ubiquitin protein ligase 2 (HECW2), mRNA.	NM_020760.1	7.02	6.02	-1	7.9
ILMN_1673543	PGM2	phosphoglucomutase 2 (PGM2), mRNA.	NM_018290.2	7.5	6.74	-0.76	7.9
ILMN_1674985	TMEM51	transmembrane protein 51 (TMEM51), mRNA.	NM_018022.1	11.3	10.57	-0.74	7.89
ILMN_1803811	TRIB1	tribbles homolog 1 (Drosophila) (TRIB1), mRNA.	NM_025195.2	9.93	10.82	0.88	7.88
ILMN_1669820	KRT6B	keratin 6B (KRT6B), mRNA.	NM_005555.3	10.36	11.31	0.95	7.88
ILMN_1830462	XYLT1	xylosyltransferase I (XYLT1), mRNA.	NM_022166.3	5.83	6.67	0.84	7.88
ILMN_1803818	NMNAT2	nicotinamide nucleotide adenylyltransferase 2 (NMNAT2), transcript variant 1, mRNA.	NM_015039.2	7.26	6.12	-1.14	7.87
ILMN_1754576	KRT6C	keratin 6C (KRT6C), mRNA.	NM_173086.3	6.66	7.79	1.13	7.87
ILMN_1709747	ENDOGL1	endonuclease G-like 1 (ENDOGL1), mRNA.	NM_005107.2	10.47	9.67	-0.79	7.86
ILMN_2337880	NRG2	neuregulin 2 (NRG2), transcript variant 4, mRNA.	NM_013983.1	6.76	5.74	-1.02	7.85
ILMN_2392546	PAICS	phosphoribosylaminoimidazole carboxylase, phosphoribosylaminoimidazole succinocarboxamide synthetase (PAICS), transcript variant 2, mRNA.	NM_006452.3	10.85	10.07	-0.78	7.84
ILMN_1671265	ING2	inhibitor of growth family, member 2 (ING2), mRNA.	NM_001564.2	8.87	8.22	-0.66	7.84
ILMN_2400648	SRGAP3	SLIT-ROBO Rho GTPase activating protein 3 (SRGAP3), transcript variant 2, mRNA.	NM_001033117.1	6.92	6.04	-0.88	7.83
ILMN_1729417	GNE	glucosamine (UDP-N-acetyl)-2-epimerase/N-acetylmannosamine kinase (GNE), mRNA.	NM_005476.3	10.13	9.08	-1.05	7.83
ILMN_1776188	MAP1LC3A	microtubule-associated protein 1 light chain 3 alpha (MAP1LC3A), transcript variant 2, mRNA.	NM_181509.1	9.02	9.78	0.76	7.83
ILMN_1790891	CKAP4	cytoskeleton-associated protein 4 (CKAP4), mRNA.	NM_006825.2	10.5	11.53	1.03	7.83
ILMN_1761260	COBLL1	COBL-like 1 (COBLL1), mRNA.	NM_014900.3	11.54	10.89	-0.65	7.82
ILMN_2087692	CYBRD1	cytochrome b reductase 1 (CYBRD1), mRNA.	NM_024843.2	9.02	7.98	-1.04	7.81
ILMN_1712431	FAM113B	family with sequence similarity 113, member B (FAM113B), mRNA.	NM_138371.1	9.92	10.68	0.76	7.81
ILMN_1792384	HABP4	hyaluronan binding protein 4 (HABP4), mRNA.	NM_014282.1	7.54	8.37	0.83	7.81
ILMN_1657870	ABL2	v-abl Abelson murine leukemia viral oncogene homolog 2 (arg, Abelson-related gene) (ABL2), transcript variant a, mRNA.	NM_005158.3	6.36	7.53	1.16	7.79
ILMN_1737484	RTN4R	reticulon 4 receptor (RTN4R), mRNA.	NM_023004.5	8.02	8.94	0.91	7.79
ILMN_2327346	SSBP4	single stranded DNA binding protein 4 (SSBP4), transcript variant 1, mRNA.	NM_032627.2	8.06	7.15	-0.91	7.78
ILMN_1798163	UPF3B	UPF3 regulator of nonsense transcripts homolog B (yeast) (UPF3B), transcript variant 2, mRNA.	NM_023010.2	10.31	9.6	-0.71	7.78
ILMN_1734742	ARHGDIA	Rho GDP dissociation inhibitor (GDI) alpha (ARHGDIA), mRNA.	NM_004309.3	9.01	9.96	0.96	7.78
ILMN_1660063	POLE4	polymerase (DNA-directed), epsilon 4 (p12 subunit) (POLE4), mRNA.	NM_019896.2	11.33	12	0.67	7.77
ILMN_1744146	PTTG2	pituitary tumor-transforming 2 (PTTG2), mRNA.	NM_006607.2	8.98	9.87	0.89	7.77
ILMN_2359601	CAMK2G	calcium/calmodulin-dependent protein kinase (CaM kinase) II gamma (CAMK2G), transcript variant 5, mRNA.	NM_172172.1	8.55	7.49	-1.06	7.76
ILMN_1736316	LOC652767	PREDICTED: hypothetical LOC652767 (LOC652767), mRNA.	XM_942408.1	6.9	6.05	-0.86	7.76
ILMN_2408572	RNASE4	ribonuclease, RNase A family, 4 (RNASE4), transcript variant 1, mRNA.	NM_194430.1	7.61	6.78	-0.82	7.76
ILMN_1778523	KLF9	Kruppel-like factor 9 (KLF9), mRNA.	NM_001206.2	7.46	6.65	-0.8	7.76
ILMN_2162860	SLFN11	schlafen family member 11 (SLFN11), mRNA.	NM_152270.2	7.35	6.44	-0.9	7.76
ILMN_2068991	TBC1D3G	TBC1 domain family, member 3G (TBC1D3G), mRNA.	NM_001040282.1	8.01	7.08	-0.93	7.75
ILMN_1693789	ALPP	alkaline phosphatase, placental (Regan isozyme) (ALPP), mRNA.	NM_001632.3	14.37	13.62	-0.75	7.74
ILMN_1675448	ZFP36L1	zinc finger protein 36, C3H type-like 1 (ZFP36L1), mRNA.	NM_004926.2	11.51	12.29	0.78	7.74
ILMN_1790202	C1orf35	chromosome 1 open reading frame 35 (C1orf35), mRNA.	NM_024319.2	9.29	8.56	-0.72	7.73
ILMN_1689318	NUAK1	NUAK family, SNF1-like kinase, 1 (NUAK1), mRNA.	NM_014840.2	10.76	11.53	0.77	7.72
ILMN_1798270	C11orf75	chromosome 11 open reading frame 75 (C11orf75), mRNA.	NM_020179.1	6.52	7.53	1.01	7.71
ILMN_1739594	ACOT11	acyl-CoA thioesterase 11 (ACOT11), transcript variant 2, mRNA.	NM_147161.2	9.51	10.24	0.72	7.71
ILMN_1899317		BX118287 Soares placenta Nb2HP cDNA clone IMAGp998N04207, mRNA sequence		7.89	6.9	-0.98	7.7
ILMN_1779147	ENC1	ectodermal-neural cortex (with BTB-like domain) (ENC1), mRNA.	NM_003633.1	7.35	8.77	1.41	7.7
ILMN_1803977	GALNT1	UDP-N-acetyl-alpha-D-galactosamine:polypeptide N-acetylgalactosaminyltransferase 1 (GalNAc-T1) (GALNT1), mRNA.	NM_020474.2	7.35	8.28	0.92	7.7
ILMN_1781356	TSC22D3	TSC22 domain family, member 3 (TSC22D3), transcript variant 1, mRNA.	NM_198057.2	7.46	6.39	-1.07	7.69
ILMN_1677814	ABCC3	ATP-binding cassette, sub-family C (CFTR/MRP), member 3 (ABCC3), mRNA.	NM_003786.2	10.91	11.67	0.76	7.69
ILMN_1838691		BX116929 Soares_multiple_sclerosis_2NbHMSP cDNA clone IMAGp998E17622, mRNA sequence		9.04	10.01	0.96	7.68
ILMN_1757210	CALML4	calmodulin-like 4 (CALML4), transcript variant 1, mRNA.	NM_001031733.1	8.76	7.93	-0.84	7.67
ILMN_1731343	LDLRAD1	low density lipoprotein receptor class A domain containing 1 (LDLRAD1), mRNA.	NM_001010978.2	6.87	5.75	-1.11	7.67
ILMN_2343278	PPAP2A	phosphatidic acid phosphatase type 2A (PPAP2A), transcript variant 2, mRNA.	NM_176895.1	8.93	9.76	0.83	7.67
ILMN_1864166		cDNA clone IMAGE:6254031		7.33	6.4	-0.93	7.66
ILMN_1753613	HOXA5	homeobox A5 (HOXA5), mRNA.	NM_019102.2	11.72	11.09	-0.63	7.66
ILMN_1708348	ADAM8	ADAM metallopeptidase domain 8 (ADAM8), mRNA.	NM_001109.3	7	6.08	-0.92	7.64
ILMN_2344216	STX2	syntaxin 2 (STX2), transcript variant 1, mRNA.	NM_001980.2	8.59	9.36	0.76	7.64
ILMN_1664738	C11orf54	chromosome 11 open reading frame 54 (C11orf54), mRNA.	NM_014039.2	9.3	8.41	-0.89	7.63
ILMN_1725791	PTPLA	protein tyrosine phosphatase-like (proline instead of catalytic arginine), member A (PTPLA), mRNA.	NM_014241.3	8.45	9.18	0.73	7.63
ILMN_1667825	MLKL	mixed lineage kinase domain-like (MLKL), mRNA.	NM_152649.1	9.29	8.24	-1.04	7.62
ILMN_2380494	ANXA11	annexin A11 (ANXA11), transcript variant a, mRNA.	NM_001157.2	9.98	9.26	-0.72	7.62
ILMN_1800142	LAMB3	laminin, beta 3 (LAMB3), transcript variant 2, mRNA.	NM_001017402.1	6.28	7.21	0.93	7.62
ILMN_1733756	COL12A1	collagen, type XII, alpha 1 (COL12A1), transcript variant short, mRNA.	NM_080645.2	8.67	9.6	0.92	7.6
ILMN_1791147	YPEL3	yippee-like 3 (Drosophila) (YPEL3), mRNA.	NM_031477.4	9.44	8.65	-0.79	7.59
ILMN_1653871	NAMPT	nicotinamide phosphoribosyltransferase (NAMPT), mRNA.	NM_005746.2	7.51	8.63	1.12	7.59
ILMN_2072357	IRF6	interferon regulatory factor 6 (IRF6), mRNA.	NM_006147.2	9.84	10.66	0.82	7.57
ILMN_2358540	RBMS1	RNA binding motif, single stranded interacting protein 1 (RBMS1), transcript variant 3, mRNA.	NM_002897.3	10.21	10.95	0.74	7.57
ILMN_2278433	LOC285074	hypothetical protein LOC285074 (LOC285074), mRNA.	NM_001012626.1	9.78	9.04	-0.74	7.55
ILMN_1742824	SPATA13	spermatogenesis associated 13 (SPATA13), mRNA.	NM_153023.1	7.18	6.23	-0.94	7.55
ILMN_1723962	LXN	latexin (LXN), mRNA.	NM_020169.2	10.35	9.68	-0.67	7.55
ILMN_1788547	GCLM	glutamate-cysteine ligase, modifier subunit (GCLM), mRNA.	NM_002061.2	10.8	11.59	0.79	7.55
ILMN_1704702	MCM7	minichromosome maintenance complex component 7 (MCM7), transcript variant 1, mRNA.	NM_005916.3	7.98	6.91	-1.07	7.54
ILMN_1746720	C18orf17	chromosome 18 open reading frame 17 (C18orf17), mRNA.	NM_153211.2	8.4	7.62	-0.78	7.54
ILMN_1788166	TTK	TTK protein kinase (TTK), mRNA.	NM_003318.3	8.94	7.87	-1.08	7.53
ILMN_1763265	CHMP1B	chromatin modifying protein 1B (CHMP1B), mRNA.	NM_020412.3	10.7	11.35	0.66	7.53
ILMN_2244009	LBH	limb bud and heart development homolog (mouse) (LBH), mRNA.	NM_030915.1	6.04	7.12	1.07	7.53
ILMN_1683998	CREG2	cellular repressor of E1A-stimulated genes 2 (CREG2), mRNA.	NM_153836.2	8.18	9.52	1.34	7.53
ILMN_1674941	TMEM16F	transmembrane protein 16F (TMEM16F), mRNA.	NM_001025356.1	10.45	11.29	0.84	7.53
ILMN_2366972	NUDT6	nudix (nucleoside diphosphate linked moiety X)-type motif 6 (NUDT6), transcript variant 1, mRNA.	NM_007083.3	7.68	6.8	-0.88	7.49
ILMN_1809384	CYP4F12	cytochrome P450, family 4, subfamily F, polypeptide 12 (CYP4F12), mRNA.	NM_023944.2	10.88	10.06	-0.82	7.49
ILMN_1725946	IRF6	interferon regulatory factor 6 (IRF6), mRNA.	NM_006147.2	10.93	11.58	0.65	7.48
ILMN_1788203	HEY1	hairy/enhancer-of-split related with YRPW motif 1 (HEY1), transcript variant 2, mRNA.	NM_001040708.1	6.42	7.24	0.82	7.48
ILMN_1658628	C14orf72	PREDICTED: chromosome 14 open reading frame 72 (C14orf72), mRNA.	XM_944937.2	6.76	6.04	-0.71	7.47
ILMN_2093674	GMFB	glia maturation factor, beta (GMFB), mRNA.	NM_004124.2	10.04	10.84	0.81	7.47
ILMN_2313079	NLRP1	NLR family, pyrin domain containing 1 (NLRP1), transcript variant 4, mRNA.	NM_033007.3	5.61	6.5	0.89	7.45
ILMN_1654653	KLC1	kinesin light chain 1 (KLC1), transcript variant 1, mRNA.	NM_005552.4	9.04	9.72	0.67	7.45
ILMN_1695759	AMDHD2	amidohydrolase domain containing 2 (AMDHD2), mRNA.	NM_015944.2	7.55	6.64	-0.91	7.44
ILMN_1807291	CYP1A1	cytochrome P450, family 1, subfamily A, polypeptide 1 (CYP1A1), mRNA.	NM_000499.2	8.05	6.81	-1.24	7.44
ILMN_1782743	LETMD1	LETM1 domain containing 1 (LETMD1), transcript variant 1, mRNA.	NM_015416.3	10.64	9.77	-0.87	7.44
ILMN_1796589	TRIP13	thyroid hormone receptor interactor 13 (TRIP13), mRNA.	NM_004237.2	9.21	8.36	-0.86	7.44
ILMN_1751097	CREB3L2	cAMP responsive element binding protein 3-like 2 (CREB3L2), mRNA.	NM_194071.2	8.55	9.33	0.78	7.44
ILMN_2375003	MAP4K4	mitogen-activated protein kinase kinase kinase kinase 4 (MAP4K4), transcript variant 3, mRNA.	NM_145687.2	7.53	8.35	0.82	7.44
ILMN_1797744	TPPP3	tubulin polymerization-promoting protein family member 3 (TPPP3), mRNA.	NM_015964.2	6.78	5.96	-0.82	7.43
ILMN_2405521	MTHFD2	methylenetetrahydrofolate dehydrogenase (NADP+ dependent) 2, methenyltetrahydrofolate cyclohydrolase (MTHFD2), nuclear gene encoding mitochondrial protein, transcript variant 2, mRNA.	NM_001040409.1	8.82	9.71	0.89	7.43
ILMN_1687960	LIMK2	LIM domain kinase 2 (LIMK2), transcript variant 2b, mRNA.	NM_016733.2	7.7	8.55	0.84	7.42
ILMN_2401826	FTSJ1	FtsJ homolog 1 (E. coli) (FTSJ1), transcript variant 1, mRNA.	NM_012280.2	7.06	8.02	0.96	7.42
ILMN_2249018	LOC389816	cytokeratin associated protein (LOC389816), mRNA.	NM_001013653.1	7.31	6.41	-0.9	7.4
ILMN_1813837	C9orf9	chromosome 9 open reading frame 9 (C9orf9), mRNA.	NM_018956.3	9.49	8.75	-0.74	7.38
ILMN_1674063	OAS2	2'-5'-oligoadenylate synthetase 2, 69/71kDa (OAS2), transcript variant 1, mRNA.	NM_016817.2	7.5	6.08	-1.42	7.38
ILMN_1723843	CSNK2A2	casein kinase 2, alpha prime polypeptide (CSNK2A2), mRNA.	NM_001896.2	11.06	10.32	-0.74	7.38
ILMN_1805225	MBOAT5	membrane bound O-acyltransferase domain containing 5 (MBOAT5), mRNA.	NM_005768.5	10.18	9.4	-0.77	7.38
ILMN_1687978	PHLDA1	pleckstrin homology-like domain, family A, member 1 (PHLDA1), mRNA.	NM_007350.3	9.16	10.31	1.15	7.38
ILMN_1752455	DOCK5	dedicator of cytokinesis 5 (DOCK5), mRNA.	NM_024940.6	8.04	9.08	1.04	7.38
ILMN_2334210	ITGB4	integrin, beta 4 (ITGB4), transcript variant 2, mRNA.	NM_001005619.1	10.81	11.82	1	7.36
ILMN_1886515		clone TESTIS-609 mRNA sequence		9.61	10.57	0.95	7.36
ILMN_1701006	HEXIM2	hexamthylene bis-acetamide inducible 2 (HEXIM2), mRNA.	NM_144608.1	7.66	6.72	-0.94	7.35
ILMN_1672076	WFDC10B	WAP four-disulfide core domain 10B (WFDC10B), transcript variant 1, mRNA.	NM_172006.2	6.57	5.74	-0.83	7.33
ILMN_1827283	LOC730704	PREDICTED: hypothetical protein LOC730704 (LOC730704), mRNA.	XM_001128267.1	7.1	6.35	-0.75	7.33
ILMN_1761560	PHF13	PHD finger protein 13 (PHF13), mRNA.	NM_153812.1	10.05	9.45	-0.6	7.33
ILMN_1797236	TGM2	transglutaminase 2 (C polypeptide, protein-glutamine-gamma-glutamyltransferase) (TGM2), transcript variant 2, mRNA.	NM_198951.1	5.98	7.13	1.15	7.33
ILMN_1720623	SYTL3	synaptotagmin-like 3 (SYTL3), mRNA.	NM_001009991.2	6.83	6.05	-0.78	7.32
ILMN_1697448	TXNIP	thioredoxin interacting protein (TXNIP), mRNA.	NM_006472.2	11.73	10.78	-0.95	7.32
ILMN_2143685	CLDN7	claudin 7 (CLDN7), mRNA.	NM_001307.3	10.84	10.07	-0.77	7.31
ILMN_1724424	PRRT2	proline-rich transmembrane protein 2 (PRRT2), mRNA.	NM_145239.1	7.79	6.78	-1.01	7.31
ILMN_1656718	DEF8	differentially expressed in FDCP 8 homolog (mouse) (DEF8), transcript variant 2, mRNA.	NM_017702.2	7.75	8.61	0.86	7.31
ILMN_1759598	DLX5	distal-less homeobox 5 (DLX5), mRNA.	NM_005221.5	7.65	8.39	0.74	7.3
ILMN_1680626	PDIA6	protein disulfide isomerase family A, member 6 (PDIA6), mRNA.	NM_005742.2	8.89	9.63	0.74	7.3
ILMN_1792660	CAMSAP1L1	calmodulin regulated spectrin-associated protein 1-like 1 (CAMSAP1L1), mRNA.	NM_203459.1	9.37	10.21	0.85	7.28
ILMN_2370208	CMTM3	CKLF-like MARVEL transmembrane domain containing 3 (CMTM3), transcript variant 5, mRNA.	NM_001048251.1	7.03	7.92	0.9	7.28
ILMN_1729095	PDZD2	PDZ domain containing 2 (PDZD2), mRNA.	NM_178140.2	7.93	7	-0.93	7.26
ILMN_1718285	HOXC8	homeobox C8 (HOXC8), mRNA.	NM_022658.3	8.11	9.09	0.98	7.25
ILMN_1738027	BRCA1	breast cancer 1, early onset (BRCA1), transcript variant BRCA1-delta14-17, mRNA.	NM_007299.2	8.73	7.66	-1.07	7.24
ILMN_1694778	LOC646723	PREDICTED: similar to Keratin, type I cytoskeletal 18 (Cytokeratin-18) (CK-18) (Keratin-18) (K18) (LOC646723), mRNA.	XR_017241.1	12.78	12.04	-0.73	7.24
ILMN_1700337	TROAP	trophinin associated protein (tastin) (TROAP), mRNA.	NM_005480.2	8.72	7.82	-0.9	7.24
ILMN_1718960	SERPINB8	serpin peptidase inhibitor, clade B (ovalbumin), member 8 (SERPINB8), transcript variant 2, mRNA.	NM_198833.1	8.89	9.76	0.87	7.24
ILMN_1859908		cDNA clone MGC:13035 IMAGE:3613409, complete cds		9.32	8.67	-0.65	7.23
ILMN_2107068	HOXA2	homeobox A2 (HOXA2), mRNA.	NM_006735.3	9.5	8.67	-0.83	7.23
ILMN_2347424	MBOAT2	membrane bound O-acyltransferase domain containing 2 (MBOAT2), mRNA.	NM_138799.2	8	9.03	1.02	7.22
ILMN_1750373	KAL1	Kallmann syndrome 1 sequence (KAL1), mRNA.	NM_000216.2	6.43	7.53	1.1	7.21
ILMN_1776464	PARP4	poly (ADP-ribose) polymerase family, member 4 (PARP4), mRNA.	NM_006437.3	12.35	11.55	-0.8	7.2
ILMN_2232157	SLMO1	slowmo homolog 1 (Drosophila) (SLMO1), mRNA.	NM_006553.2	7.76	8.59	0.83	7.2
ILMN_1795906	PCBD1	pterin-4 alpha-carbinolamine dehydratase/dimerization cofactor of hepatocyte nuclear factor 1 alpha (PCBD1), mRNA.	NM_000281.2	10.27	9.53	-0.74	7.19
ILMN_1757338	PLSCR4	phospholipid scramblase 4 (PLSCR4), mRNA.	NM_020353.1	7.61	6.7	-0.91	7.19
ILMN_1680507	PPP2R2C	protein phosphatase 2 (formerly 2A), regulatory subunit B, gamma isoform (PPP2R2C), transcript variant 2, mRNA.	NM_181876.2	6.67	7.59	0.92	7.19
ILMN_2233454	SPTLC3	serine palmitoyltransferase, long chain base subunit 3 (SPTLC3), mRNA.	NM_018327.2	9.37	8.41	-0.96	7.18
ILMN_1771385	GBP4	guanylate binding protein 4 (GBP4), mRNA.	NM_052941.3	6.83	6.02	-0.81	7.18
ILMN_1804822	SRXN1	sulfiredoxin 1 homolog (S. cerevisiae) (SRXN1), mRNA.	NM_080725.1	9.8	10.48	0.68	7.18
ILMN_1654639	HERC6	hect domain and RLD 6 (HERC6), mRNA.	NM_017912.3	7.01	6.09	-0.92	7.17
ILMN_1853167		UI-H-DI0-auw-h-24-0-UI.s1 NCI_CGAP_DI0 cDNA clone IMAGE:5875271 3, mRNA sequence		8.1	6.94	-1.16	7.17
ILMN_1745079	TRIM2	tripartite motif-containing 2 (TRIM2), mRNA.	NM_015271.2	9.18	8.14	-1.04	7.17
ILMN_1712291	MICALL2	MICAL-like 2 (MICALL2), transcript variant 1, mRNA.	NM_182924.2	6.7	7.81	1.11	7.17
ILMN_1742788	PKD1L2	polycystic kidney disease 1-like 2 (PKD1L2), transcript variant 1, mRNA.	NM_052892.3	6.9	6.08	-0.82	7.16
ILMN_1686989	INSIG1	insulin induced gene 1 (INSIG1), transcript variant 2, mRNA.	NM_198336.1	8.68	9.8	1.12	7.16
ILMN_1677963	TMCC1	transmembrane and coiled-coil domain family 1 (TMCC1), transcript variant 1, mRNA.	NM_001017395.1	6.47	7.48	1	7.16
ILMN_2323848	PARD6A	par-6 partitioning defective 6 homolog alpha (C. elegans) (PARD6A), transcript variant 1, mRNA.	NM_016948.2	7.25	6.33	-0.91	7.15
ILMN_1800993	CLUAP1	clusterin associated protein 1 (CLUAP1), transcript variant 2, mRNA.	NM_024793.1	8.94	7.89	-1.05	7.15
ILMN_1849117		mRNA full length insert cDNA clone EUROIMAGE 151432		7.23	6.41	-0.82	7.15
ILMN_1787648	GPR125	PREDICTED: G protein-coupled receptor 125, transcript variant 4 (GPR125), mRNA.	XM_944791.1	9.81	8.61	-1.2	7.15
ILMN_1675640	OAS1	2',5'-oligoadenylate synthetase 1, 40/46kDa (OAS1), transcript variant 3, mRNA.	NM_001032409.1	7.7	6.56	-1.14	7.14
ILMN_1773742	DNAJB9	DnaJ (Hsp40) homolog, subfamily B, member 9 (DNAJB9), mRNA.	NM_012328.1	7.33	8.06	0.73	7.14
ILMN_1739236	ZNF668	zinc finger protein 668 (ZNF668), mRNA.	NM_024706.3	8.85	9.5	0.65	7.14
ILMN_1719986	PIK3IP1	phosphoinositide-3-kinase interacting protein 1 (PIK3IP1), mRNA.	NM_052880.3	10.8	10.02	-0.78	7.13
ILMN_1807972	MICAL1	microtubule associated monoxygenase, calponin and LIM domain containing 1 (MICAL1), mRNA.	NM_022765.2	6.63	7.63	1.01	7.12
ILMN_1735579	CGB8	chorionic gonadotropin, beta polypeptide 8 (CGB8), mRNA.	NM_033183.2	6.13	6.98	0.84	7.12
ILMN_1733176	LIMS1	PREDICTED: LIM and senescent cell antigen-like domains 1 (LIMS1), mRNA.	XM_938773.1	11.6	12.36	0.76	7.1
ILMN_1661708	LGALS7	lectin, galactoside-binding, soluble, 7 (galectin 7) (LGALS7), mRNA.	NM_002307.1	12.31	12.98	0.67	7.09
ILMN_1678962	DFFB	DNA fragmentation factor, 40kDa, beta polypeptide (caspase-activated DNase) (DFFB), mRNA.	NM_004402.2	8.63	7.53	-1.09	7.08
ILMN_1727178	FLJ45803	FLJ45803 protein (FLJ45803), mRNA.	NM_207429.2	6.64	5.83	-0.81	7.08
ILMN_1719649	TMEM63A	transmembrane protein 63A (TMEM63A), mRNA.	NM_014698.1	7.25	6.36	-0.89	7.07
ILMN_1718070	CASP9	caspase 9, apoptosis-related cysteine peptidase (CASP9), transcript variant beta, mRNA.	NM_032996.1	7.92	7.13	-0.79	7.07
ILMN_1757877	HCFC1R1	host cell factor C1 regulator 1 (XPO1 dependent) (HCFC1R1), transcript variant 3, mRNA.	NM_001002018.1	11.2	10.55	-0.65	7.07
ILMN_1696956	ARID3B	AT rich interactive domain 3B (BRIGHT-like) (ARID3B), mRNA.	NM_006465.2	9.11	9.81	0.69	7.07
ILMN_1716733	MYOM2	myomesin (M-protein) 2, 165kDa (MYOM2), mRNA.	NM_003970.1	7.63	6.87	-0.75	7.06
ILMN_2390853	CTSH	cathepsin H (CTSH), transcript variant 1, mRNA.	NM_004390.2	13.65	13.02	-0.63	7.06
ILMN_1690454	C3orf54	chromosome 3 open reading frame 54 (C3orf54), mRNA.	NM_203370.1	9.94	10.66	0.72	7.06
ILMN_2380771	AKR1A1	aldo-keto reductase family 1, member A1 (aldehyde reductase) (AKR1A1), transcript variant 2, mRNA.	NM_153326.1	12.03	11.35	-0.68	7.04
ILMN_2337655	WARS	tryptophanyl-tRNA synthetase (WARS), transcript variant 1, mRNA.	NM_004184.3	10.54	11.15	0.6	7.04
ILMN_2409298	NUSAP1	nucleolar and spindle associated protein 1 (NUSAP1), transcript variant 2, mRNA.	NM_018454.5	9.89	9.17	-0.72	7.02
ILMN_1824362		BX105338 Soares_pregnant_uterus_NbHPU cDNA clone IMAGp998C114347, mRNA sequence		8.03	9.03	0.99	7.02
ILMN_2367671	LIMK2	LIM domain kinase 2 (LIMK2), transcript variant 2b, mRNA.	NM_016733.2	7.8	8.65	0.85	7.02
ILMN_1670809	NRM	nurim (nuclear envelope membrane protein) (NRM), mRNA.	NM_007243.1	7.91	6.83	-1.08	7.01
ILMN_2387952	FAM134B	family with sequence similarity 134, member B (FAM134B), transcript variant 1, mRNA.	NM_001034850.1	9.15	8.39	-0.77	7.01
ILMN_2134555	KCTD3	potassium channel tetramerisation domain containing 3 (KCTD3), mRNA.	NM_016121.3	10.68	9.71	-0.96	7.01
ILMN_1711627	SIAH1	seven in absentia homolog 1 (Drosophila) (SIAH1), transcript variant 2, mRNA.	NM_001006610.1	11.55	12.28	0.73	7.01
ILMN_1755954	CPEB3	cytoplasmic polyadenylation element binding protein 3 (CPEB3), mRNA.	NM_014912.3	8.62	7.53	-1.09	7
ILMN_1712545	S100A3	S100 calcium binding protein A3 (S100A3), mRNA.	NM_002960.1	10.53	11.24	0.71	7
ILMN_1674661	CIRBP	cold inducible RNA binding protein (CIRBP), mRNA.	NM_001280.1	12.15	11.44	-0.71	6.99
ILMN_1665437	CYP2E1	cytochrome P450, family 2, subfamily E, polypeptide 1 (CYP2E1), mRNA.	NM_000773.3	8.93	8.18	-0.75	6.99
ILMN_1657550	MVD	mevalonate (diphospho) decarboxylase (MVD), mRNA.	NM_002461.1	8.6	9.4	0.79	6.99
ILMN_1716616	MARVELD3	MARVEL domain containing 3 (MARVELD3), transcript variant 2, mRNA.	NM_052858.3	8.64	7.76	-0.87	6.97
ILMN_1810962	PTPRK	protein tyrosine phosphatase, receptor type, K (PTPRK), mRNA.	NM_002844.2	9.88	10.82	0.93	6.97
ILMN_2054392	PPIL1	peptidylprolyl isomerase (cyclophilin)-like 1 (PPIL1), mRNA.	NM_016059.3	8.38	9.23	0.85	6.96
ILMN_1673769	KCNG1	potassium voltage-gated channel, subfamily G, member 1 (KCNG1), mRNA.	NM_002237.3	7.03	8.08	1.05	6.96
ILMN_2071826	RNF152	ring finger protein 152 (RNF152), mRNA.	NM_173557.2	8.4	9.19	0.8	6.95
ILMN_1723709	C9orf116	chromosome 9 open reading frame 116 (C9orf116), transcript variant 2, mRNA.	NM_144654.2	8.82	7.95	-0.87	6.93
ILMN_1737611	VAMP1	vesicle-associated membrane protein 1 (synaptobrevin 1) (VAMP1), transcript variant 2, mRNA.	NM_199245.1	10.13	9.47	-0.66	6.93
ILMN_2169439	ITGAV	integrin, alpha V (vitronectin receptor, alpha polypeptide, antigen CD51) (ITGAV), mRNA.	NM_002210.2	8.33	9.83	1.5	6.93
ILMN_1724877	PARD6G	par-6 partitioning defective 6 homolog gamma (C. elegans) (PARD6G), mRNA.	NM_032510.3	7.17	8.14	0.97	6.92
ILMN_1658094	ZNF365	zinc finger protein 365 (ZNF365), transcript variant A, mRNA.	NM_014951.2	9.75	10.54	0.79	6.91
ILMN_1910948		mRNA; cDNA DKFZp686J1595 (from clone DKFZp686J1595)		6.59	7.61	1.02	6.9
ILMN_1746158	HOXD11	homeobox D11 (HOXD11), mRNA.	NM_021192.2	8.36	9.28	0.92	6.89
ILMN_1820244		cDNA clone IMAGE:6250506		7.41	8.14	0.73	6.88
ILMN_1769891	CDH4	cadherin 4, type 1, R-cadherin (retinal) (CDH4), mRNA.	NM_001794.2	7.15	6.38	-0.77	6.87
ILMN_1756469	GAMT	guanidinoacetate N-methyltransferase (GAMT), transcript variant 1, mRNA.	NM_000156.4	8.07	7.2	-0.87	6.87
ILMN_1793729	C15orf39	chromosome 15 open reading frame 39 (C15orf39), mRNA.	NM_015492.4	7.31	6.35	-0.97	6.87
ILMN_1685441	DDEFL1	development and differentiation enhancing factor-like 1 (DDEFL1), mRNA.	NM_017707.2	10.16	9.21	-0.95	6.86
ILMN_1659836	RAET1G	retinoic acid early transcript 1G (RAET1G), mRNA.	NM_001001788.2	7.7	6.76	-0.94	6.86
ILMN_2262444	PDE7A	phosphodiesterase 7A (PDE7A), transcript variant 2, mRNA.	NM_002604.1	9.36	10.18	0.83	6.86
ILMN_2130635	FOXRED2	FAD-dependent oxidoreductase domain containing 2 (FOXRED2), mRNA.	NM_024955.4	8.86	8.1	-0.76	6.85
ILMN_2398408	TCEAL1	transcription elongation factor A (SII)-like 1 (TCEAL1), transcript variant 2, mRNA.	NM_001006639.1	10.05	10.86	0.82	6.85
ILMN_1893679		BX098660 Soares placenta Nb2HP cDNA clone IMAGp998L03214, mRNA sequence		7.93	6.88	-1.05	6.84
ILMN_1701881	ZNF365	zinc finger protein 365 (ZNF365), transcript variant B, mRNA.	NM_199450.2	6.1	6.95	0.85	6.84
ILMN_1695658	KIF20A	kinesin family member 20A (KIF20A), mRNA.	NM_005733.1	9.96	9.32	-0.64	6.83
ILMN_2397521	JMJD3	jumonji domain containing 3, histone lysine demethylase (JMJD3), mRNA.	NM_001080424.1	6.28	7.21	0.93	6.83
ILMN_1813625	TRIM25	tripartite motif-containing 25 (TRIM25), mRNA.	NM_005082.4	9.73	8.98	-0.75	6.81
ILMN_1741970	JUP	junction plakoglobin (JUP), transcript variant 1, mRNA.	NM_002230.1	9.02	10.01	0.98	6.8
ILMN_1704164	ATP13A2	ATPase type 13A2 (ATP13A2), mRNA.	NM_022089.1	7.52	8.32	0.79	6.79
ILMN_2305112	CTH	cystathionase (cystathionine gamma-lyase) (CTH), transcript variant 2, mRNA.	NM_153742.3	8.14	7.21	-0.93	6.78
ILMN_1679438	MLF1IP	MLF1 interacting protein (MLF1IP), mRNA.	NM_024629.2	7.36	6.34	-1.02	6.78
ILMN_1770290	CNN2	calponin 2 (CNN2), transcript variant 2, mRNA.	NM_201277.1	11.35	12.04	0.68	6.77
ILMN_1662328	CNNM3	cyclin M3 (CNNM3), transcript variant 1, mRNA.	NM_017623.4	9.9	9.18	-0.73	6.76
ILMN_1685043	CYP3A7	cytochrome P450, family 3, subfamily A, polypeptide 7 (CYP3A7), mRNA.	NM_000765.2	6.82	5.86	-0.95	6.76
ILMN_1793615	ME3	malic enzyme 3, NADP(+)-dependent, mitochondrial (ME3), nuclear gene encoding mitochondrial protein, transcript variant 2, mRNA.	NM_001014811.1	5.94	6.6	0.66	6.76
ILMN_1744963	ERO1L	ERO1-like (S. cerevisiae) (ERO1L), mRNA.	NM_014584.1	8.62	9.29	0.66	6.75
ILMN_1659888	PPP1R14B	protein phosphatase 1, regulatory (inhibitor) subunit 14B (PPP1R14B), mRNA.	NM_138689.2	11.82	12.44	0.63	6.75
ILMN_2051381	ALDH16A1	aldehyde dehydrogenase 16 family, member A1 (ALDH16A1), mRNA.	NM_153329.2	8.16	7.26	-0.9	6.74
ILMN_1747395	SLC24A1	solute carrier family 24 (sodium/potassium/calcium exchanger), member 1 (SLC24A1), mRNA.	NM_004727.2	7.97	7.2	-0.78	6.73
ILMN_1737650	DIO2	deiodinase, iodothyronine, type II (DIO2), transcript variant 3, mRNA.	NM_001007023.2	6.97	7.86	0.89	6.73
ILMN_2150654	ZSWIM4	zinc finger, SWIM-type containing 4 (ZSWIM4), mRNA.	NM_023072.1	8.73	9.33	0.6	6.73
ILMN_1689001	CDK4	cyclin-dependent kinase 4 (CDK4), mRNA.	NM_000075.2	11.19	10.62	-0.57	6.72
ILMN_1740762	GRB7	growth factor receptor-bound protein 7 (GRB7), transcript variant 1, mRNA.	NM_005310.2	7.59	6.63	-0.97	6.72
ILMN_2143155	KIF11	kinesin family member 11 (KIF11), mRNA.	NM_004523.2	9.14	8.24	-0.9	6.72
ILMN_1772894	TMEM27	transmembrane protein 27 (TMEM27), mRNA.	NM_020665.3	7.75	6.64	-1.11	6.72
ILMN_1780898	PRKCH	protein kinase C, eta (PRKCH), mRNA.	NM_006255.3	9.19	9.85	0.66	6.72
ILMN_2193591	UNC93B1	unc-93 homolog B1 (C. elegans) (UNC93B1), mRNA.	NM_030930.2	10.07	9.43	-0.64	6.71
ILMN_1768754	PILRB	paired immunoglobin-like type 2 receptor beta (PILRB), transcript variant 1, mRNA.	NM_013440.3	10.06	9.12	-0.93	6.69
ILMN_2360415	PRNP	prion protein (p27-30) (Creutzfeldt-Jakob disease, Gerstmann-Strausler-Scheinker syndrome, fatal familial insomnia) (PRNP), transcript variant 2, mRNA.	NM_183079.2	12.45	13.15	0.7	6.69
ILMN_2186216	GOLPH4	golgi phosphoprotein 4 (GOLPH4), mRNA.	NM_014498.2	7.57	8.56	0.99	6.68
ILMN_2329569	C9orf116	chromosome 9 open reading frame 116 (C9orf116), transcript variant 2, mRNA.	NM_144654.2	8.45	7.68	-0.76	6.66
ILMN_1782745	RBL1	retinoblastoma-like 1 (p107) (RBL1), transcript variant 1, mRNA.	NM_002895.2	7.99	7.09	-0.9	6.66
ILMN_1757388	OCEL1	occludin/ELL domain containing 1 (OCEL1), mRNA.	NM_024578.1	9.21	8.43	-0.78	6.66
ILMN_1812616	MYO1C	myosin IC (MYO1C), transcript variant 3, mRNA.	NM_033375.4	8.86	9.68	0.82	6.66
ILMN_1797875	ALOX5AP	arachidonate 5-lipoxygenase-activating protein (ALOX5AP), mRNA.	NM_001629.2	6.66	7.43	0.76	6.65
ILMN_1765122	MAP3K2	PREDICTED: mitogen-activated protein kinase kinase kinase 2 (MAP3K2), mRNA.	XM_001128799.1	8.37	9.25	0.89	6.65
ILMN_1679267	TGM2	transglutaminase 2 (C polypeptide, protein-glutamine-gamma-glutamyltransferase) (TGM2), transcript variant 2, mRNA.	NM_198951.1	5.8	6.62	0.82	6.65
ILMN_1727671	SSH1	slingshot homolog 1 (Drosophila) (SSH1), mRNA.	NM_018984.2	7.82	8.78	0.96	6.65
ILMN_1673337	PMS2CL	PMS2 C-terminal like pseudogene (PMS2CL) on chromosome 7.	NR_002217.1	7.54	6.61	-0.93	6.64
ILMN_1715905	DSN1	DSN1, MIND kinetochore complex component, homolog (S. cerevisiae) (DSN1), mRNA.	NM_024918.2	9.41	8.39	-1.02	6.64
ILMN_1711361	ZNF319	zinc finger protein 319 (ZNF319), mRNA.	NM_020807.1	9.12	9.77	0.65	6.64
ILMN_2370365	RFC4	replication factor C (activator 1) 4, 37kDa (RFC4), transcript variant 1, mRNA.	NM_002916.3	10.6	9.65	-0.95	6.63
ILMN_1712305	CYBRD1	cytochrome b reductase 1 (CYBRD1), mRNA.	NM_024843.2	8.56	7.47	-1.1	6.63
ILMN_2415776	WWOX	WW domain containing oxidoreductase (WWOX), transcript variant 3, mRNA.	NM_130844.1	9.64	8.6	-1.04	6.63
ILMN_2230566	RAB40B	RAB40B, member RAS oncogene family (RAB40B), mRNA.	NM_006822.1	11.67	10.97	-0.7	6.62
ILMN_1810275	SLC7A7	solute carrier family 7 (cationic amino acid transporter, y+ system), member 7 (SLC7A7), mRNA.	NM_003982.2	8.85	9.6	0.75	6.62
ILMN_1803464	PHTF1	putative homeodomain transcription factor 1 (PHTF1), mRNA.	NM_006608.1	8.02	8.75	0.74	6.62
ILMN_2339835	PTGS1	prostaglandin-endoperoxide synthase 1 (prostaglandin G/H synthase and cyclooxygenase) (PTGS1), transcript variant 2, mRNA.	NM_080591.1	7.78	6.99	-0.78	6.61
ILMN_1711894	MYB	v-myb myeloblastosis viral oncogene homolog (avian) (MYB), mRNA.	NM_005375.2	6.7	5.93	-0.77	6.61
ILMN_1769694	ACCN2	amiloride-sensitive cation channel 2, neuronal (ACCN2), transcript variant 2, mRNA.	NM_001095.2	7.78	6.93	-0.85	6.6
ILMN_2353633	EMR2	egf-like module containing, mucin-like, hormone receptor-like 2 (EMR2), transcript variant 2, mRNA.	NM_152916.1	7.29	6.28	-1.01	6.6
ILMN_1654370	TESK2	testis-specific kinase 2 (TESK2), mRNA.	NM_007170.2	7.9	7.13	-0.77	6.6
ILMN_1798855	RASSF9	Ras association (RalGDS/AF-6) domain family (N-terminal) member 9 (RASSF9), mRNA.	NM_005447.3	5.97	6.77	0.8	6.6
ILMN_2112301	DRAP1	DR1-associated protein 1 (negative cofactor 2 alpha) (DRAP1), mRNA.	NM_006442.2	10.76	11.37	0.61	6.6
ILMN_1842582		AGENCOURT_14354957 NIH_MGC_191 cDNA clone IMAGE:30413554 5, mRNA sequence		8.79	8.13	-0.66	6.59
ILMN_1747223	FRYL	FRY-like (FRYL), mRNA.	NM_015030.1	7.99	8.84	0.85	6.59
ILMN_1702636	TUBB6	tubulin, beta 6 (TUBB6), mRNA.	NM_032525.1	9	9.8	0.8	6.59
ILMN_1796013	PYCR1	pyrroline-5-carboxylate reductase 1 (PYCR1), transcript variant 2, mRNA.	NM_153824.1	6.92	7.92	1	6.59
ILMN_1728858	EGFR	epidermal growth factor receptor (erythroblastic leukemia viral (v-erb-b) oncogene homolog, avian) (EGFR), transcript variant 4, mRNA.	NM_201284.1	6.81	7.76	0.95	6.56
ILMN_1763852	ACACB	acetyl-Coenzyme A carboxylase beta (ACACB), mRNA.	NM_001093.3	9.02	8.11	-0.91	6.55
ILMN_1707807	RNF128	ring finger protein 128 (RNF128), transcript variant 1, mRNA.	NM_194463.1	6.76	7.56	0.8	6.55
ILMN_2371911	MUC1	mucin 1, cell surface associated (MUC1), transcript variant 5, mRNA.	NM_001044390.1	7.97	7.13	-0.84	6.53
ILMN_2235137	FANCD2	Fanconi anemia, complementation group D2 (FANCD2), transcript variant 2, mRNA.	NM_001018115.1	8.99	8.03	-0.96	6.53
ILMN_1734781	IFNE1	interferon epsilon 1 (IFNE1), mRNA.	NM_176891.3	6.46	7.29	0.83	6.53
ILMN_1668194	LMTK3	PREDICTED: lemur tyrosine kinase 3 (LMTK3), mRNA.	XM_936372.2	9.43	8.62	-0.82	6.52
ILMN_1813386	CORO6	coronin 6 (CORO6), mRNA.	NM_032854.2	8.11	9.01	0.9	6.52
ILMN_1653278	MUC20	mucin 20, cell surface associated (MUC20), transcript variant S, mRNA.	NM_001098516.1	7.42	6.67	-0.76	6.51
ILMN_1830985	RAD51AP2	RAD51-associated protein 2 (RAD51AP2), mRNA.	NM_001099218.2	7.27	6.49	-0.78	6.51
ILMN_1742260	SSFA2	sperm specific antigen 2 (SSFA2), mRNA.	NM_006751.4	8.4	9.39	0.99	6.49
ILMN_1658494	C13orf15	chromosome 13 open reading frame 15 (C13orf15), mRNA.	NM_014059.2	9.43	8.76	-0.67	6.47
ILMN_2085236	SNX24	sorting nexin 24 (SNX24), mRNA.	NM_014035.1	7.56	8.55	0.99	6.46
ILMN_2401822	FTSJ1	FtsJ homolog 1 (E. coli) (FTSJ1), transcript variant 1, mRNA.	NM_012280.2	9.61	10.42	0.8	6.43
ILMN_2349600	BRD8	bromodomain containing 8 (BRD8), transcript variant 3, mRNA.	NM_183359.1	9.93	9.24	-0.69	6.4
ILMN_1748970	ATAD4	ATPase family, AAA domain containing 4 (ATAD4), mRNA.	NM_024320.2	8.74	7.86	-0.88	6.39
ILMN_2215881	ARHGAP11B	Rho GTPase activating protein 11B (ARHGAP11B), mRNA. XM_931045 XM_931050	NM_001039841.1	8.32	7.29	-1.03	6.39
ILMN_2377829	NANOS1	nanos homolog 1 (Drosophila) (NANOS1), transcript variant 2, mRNA.	NM_001009553.1	8.19	7.18	-1.01	6.38
ILMN_1701244	ITFG2	integrin alpha FG-GAP repeat containing 2 (ITFG2), mRNA.	NM_018463.2	8.52	7.91	-0.61	6.37
ILMN_1893697		nj54b12.s1 NCI_CGAP_Pr9 cDNA clone IMAGE:996287, mRNA sequence		7.08	6.24	-0.85	6.36
ILMN_1789733	CLIP3	CAP-GLY domain containing linker protein 3 (CLIP3), mRNA.	NM_015526.1	8.27	7.58	-0.68	6.35
ILMN_2094313	ZDHHC1	zinc finger, DHHC-type containing 1 (ZDHHC1), mRNA.	NM_013304.1	9.19	8.45	-0.74	6.35
ILMN_1658926	NOTCH3	Notch homolog 3 (Drosophila) (NOTCH3), mRNA.	NM_000435.1	9.31	8.17	-1.15	6.35
ILMN_1793461	LOC653604	PREDICTED: similar to H3 histone, family 2 isoform 2 (LOC653604), mRNA.	XM_497711.2	7.06	6.34	-0.72	6.35
ILMN_1799836	HOXA2	homeobox A2 (HOXA2), mRNA.	NM_006735.3	9.58	8.94	-0.64	6.35
ILMN_1760490	ACVR1	activin A receptor, type I (ACVR1), mRNA.	NM_001105.2	10.53	11.24	0.71	6.35
ILMN_2290118	MEGF9	multiple EGF-like-domains 9 (MEGF9), mRNA.	NM_001080497.1	7.39	8.69	1.3	6.35
ILMN_2395451	ASS1	argininosuccinate synthetase 1 (ASS1), transcript variant 2, mRNA.	NM_054012.3	10.93	10.08	-0.84	6.34
ILMN_1659599	ADC	arginine decarboxylase (ADC), mRNA.	NM_052998.2	7.94	8.64	0.7	6.34
ILMN_1800575	LOC649260	PREDICTED: similar to LIM and senescent cell antigen-like domains 1 (LOC649260), mRNA.	XM_938322.1	7.49	8.33	0.84	6.34
ILMN_1668374	ITGB5	integrin, beta 5 (ITGB5), mRNA. XM_944688 XM_944693	NM_002213.3	12.57	13.1	0.52	6.34
ILMN_1772876	ZNF395	zinc finger protein 395 (ZNF395), mRNA.	NM_018660.2	10.29	9.55	-0.75	6.33
ILMN_1660624	LIMK2	LIM domain kinase 2 (LIMK2), transcript variant 1, mRNA.	NM_001031801.1	8.57	9.36	0.79	6.33
ILMN_1804277	SPRED1	sprouty-related, EVH1 domain containing 1 (SPRED1), mRNA.	NM_152594.1	9.35	10.08	0.73	6.33
ILMN_2157099	CCNA1	cyclin A1 (CCNA1), mRNA.	NM_003914.2	6.13	6.78	0.66	6.33
ILMN_2212763	ICAM3	intercellular adhesion molecule 3 (ICAM3), mRNA.	NM_002162.2	9.27	8.62	-0.65	6.32
ILMN_1691294	CTBP2	C-terminal binding protein 2 (CTBP2), transcript variant 1, mRNA.	NM_001329.2	7.22	7.93	0.71	6.32
ILMN_1800787	RFTN1	raftlin, lipid raft linker 1 (RFTN1), mRNA.	NM_015150.1	5.88	6.63	0.75	6.31
ILMN_1743933	TSHZ3	teashirt zinc finger homeobox 3 (TSHZ3), mRNA.	NM_020856.2	7.35	8.28	0.93	6.3
ILMN_2268068	MAPKAP1	mitogen-activated protein kinase associated protein 1 (MAPKAP1), transcript variant 6, mRNA.	NM_001006618.1	8.6	9.29	0.7	6.3
ILMN_1663454	PKP1	plakophilin 1 (ectodermal dysplasia/skin fragility syndrome) (PKP1), transcript variant 1a, mRNA.	NM_001005337.1	11.01	11.69	0.68	6.3
ILMN_1737195	CENPK	centromere protein K (CENPK), mRNA.	NM_022145.3	8.12	7.26	-0.86	6.28
ILMN_1652409	SPATA7	spermatogenesis associated 7 (SPATA7), transcript variant 2, mRNA.	NM_001040428.2	9.69	8.92	-0.77	6.28
ILMN_1786972	SARS	seryl-tRNA synthetase (SARS), mRNA.	NM_006513.2	9.25	10.02	0.77	6.27
ILMN_1727271	WARS	tryptophanyl-tRNA synthetase (WARS), transcript variant 2, mRNA.	NM_173701.1	9.51	10.26	0.75	6.26
ILMN_1761939	TIPIN	TIMELESS interacting protein (TIPIN), mRNA.	NM_017858.1	7.78	6.88	-0.9	6.25
ILMN_2402416	DNAJB6	DnaJ (Hsp40) homolog, subfamily B, member 6 (DNAJB6), transcript variant 2, mRNA.	NM_005494.2	11.07	11.73	0.66	6.24
ILMN_1679929	KLF13	Kruppel-like factor 13 (KLF13), mRNA.	NM_015995.2	10.09	10.87	0.78	6.23
ILMN_2382290	KREMEN2	kringle containing transmembrane protein 2 (KREMEN2), transcript variant 2, mRNA.	NM_024507.2	7.61	6.88	-0.73	6.22
ILMN_1695475	SEMA3C	sema domain, immunoglobulin domain (Ig), short basic domain, secreted, (semaphorin) 3C (SEMA3C), mRNA.	NM_006379.2	8.59	9.62	1.03	6.22
ILMN_1683023	PDGFC	platelet derived growth factor C (PDGFC), mRNA.	NM_016205.1	6.88	7.78	0.9	6.22
ILMN_1794781	VAV2	vav 2 guanine nucleotide exchange factor (VAV2), mRNA.	NM_003371.2	7.59	8.4	0.81	6.22
ILMN_2277099	YWHAB	tyrosine 3-monooxygenase/tryptophan 5-monooxygenase activation protein, beta polypeptide (YWHAB), transcript variant 1, mRNA.	NM_003404.3	9.52	10.18	0.66	6.22
ILMN_1655117	WDR19	WD repeat domain 19 (WDR19), mRNA.	NM_025132.3	10.26	9.69	-0.58	6.21
ILMN_1692844	TBC1D19	TBC1 domain family, member 19 (TBC1D19), mRNA.	NM_018317.1	7.57	8.29	0.73	6.21
ILMN_1794595	GAMT	guanidinoacetate N-methyltransferase (GAMT), transcript variant 1, mRNA.	NM_000156.4	7.14	6.3	-0.84	6.2
ILMN_1773002	LOC730417	PREDICTED: hypothetical protein LOC730417 (LOC730417), mRNA.	XM_001125098.1	6.52	7.53	1.01	6.2
ILMN_1682567	CCDC106	coiled-coil domain containing 106 (CCDC106), mRNA.	NM_013301.2	10.04	9.37	-0.67	6.19
ILMN_1652952	RASAL2	RAS protein activator like 2 (RASAL2), transcript variant 1, mRNA.	NM_004841.2	6.88	7.76	0.88	6.18
ILMN_1708016	C20orf108	chromosome 20 open reading frame 108 (C20orf108), mRNA.	NM_080821.2	10.49	11.47	0.98	6.18
ILMN_1709795	RAC2	ras-related C3 botulinum toxin substrate 2 (rho family, small GTP binding protein Rac2) (RAC2), mRNA.	NM_002872.3	10.1	9.48	-0.62	6.17
ILMN_1810953	LOC653496	PREDICTED: similar to hypothetical gene supported by AK123662 (LOC653496), mRNA.	XM_930236.1	7.9	8.71	0.81	6.17
ILMN_1694767	LOC652688	PREDICTED: similar to Zinc finger protein basonuclin-1 (LOC652688), mRNA.	XM_942297.1	7.95	8.95	1	6.16
ILMN_1733746	REEP1	receptor accessory protein 1 (REEP1), mRNA.	NM_022912.1	7.58	8.49	0.91	6.16
ILMN_1717046	MOBKL2B	MOB1, Mps One Binder kinase activator-like 2B (yeast) (MOBKL2B), mRNA.	NM_024761.3	7.76	8.8	1.04	6.16
ILMN_1750409	RAB9A	RAB9A, member RAS oncogene family (RAB9A), mRNA.	NM_004251.3	11.01	10.45	-0.56	6.15
ILMN_1805922	EBPL	emopamil binding protein-like (EBPL), mRNA.	NM_032565.2	10.86	10.25	-0.61	6.14
ILMN_1778543	LOC653874	PREDICTED: similar to Dihydrofolate reductase, transcript variant 1 (LOC653874), mRNA.	XM_936215.1	9.39	8.47	-0.92	6.14
ILMN_1808566	TMEM180	transmembrane protein 180 (TMEM180), mRNA.	NM_024789.3	7.63	6.99	-0.64	6.14
ILMN_2169261	TNNI2	troponin I type 2 (skeletal, fast) (TNNI2), mRNA.	NM_003282.2	8.22	7.46	-0.76	6.14
ILMN_1808650	CYP39A1	cytochrome P450, family 39, subfamily A, polypeptide 1 (CYP39A1), mRNA.	NM_016593.3	7.25	6.24	-1.01	6.14
ILMN_1767343	LOC126147	hypothetical protein BC018697 (LOC126147), mRNA.	NM_145807.1	6.82	5.93	-0.88	6.14
ILMN_1735151	EIF5A2	eukaryotic translation initiation factor 5A2 (EIF5A2), mRNA.	NM_020390.5	6.92	7.58	0.66	6.14
ILMN_1801851	ALPPL2	alkaline phosphatase, placental-like 2 (ALPPL2), mRNA.	NM_031313.1	7.57	6.77	-0.8	6.13
ILMN_1784860	RFC3	replication factor C (activator 1) 3, 38kDa (RFC3), transcript variant 1, mRNA.	NM_002915.3	7.74	7.03	-0.71	6.11
ILMN_1692748	BNC1	basonuclin 1 (BNC1), mRNA.	NM_001717.2	7.88	8.84	0.96	6.11
ILMN_1664761	TMEM138	transmembrane protein 138 (TMEM138), mRNA.	NM_016464.3	10.06	10.7	0.64	6.11
ILMN_1785919	LOC728229	PREDICTED: hypothetical protein LOC728229, transcript variant 3 (LOC728229), mRNA.	XM_001128450.1	7.6	8.36	0.76	6.11
ILMN_1781536	FAH	fumarylacetoacetate hydrolase (fumarylacetoacetase) (FAH), mRNA.	NM_000137.1	8.73	7.97	-0.76	6.1
ILMN_1781242	SOST	sclerosteosis (SOST), mRNA.	NM_025237.2	8.07	8.76	0.69	6.08
ILMN_1823809		cDNA: FLJ21429 fis, clone COL04205		8.6	9.44	0.84	6.08
ILMN_1751346	ERBB3	v-erb-b2 erythroblastic leukemia viral oncogene homolog 3 (avian) (ERBB3), transcript variant 1, mRNA.	NM_001982.2	10.18	8.99	-1.19	6.07
ILMN_1671250	CLIC4	chloride intracellular channel 4 (CLIC4), nuclear gene encoding mitochondrial protein, mRNA.	NM_013943.1	6.73	7.64	0.91	6.07
ILMN_1721605	SMYD2	SET and MYND domain containing 2 (SMYD2), mRNA.	NM_020197.1	8.92	9.65	0.73	6.07
ILMN_1867664	SPTLC3	serine palmitoyltransferase, long chain base subunit 3 (SPTLC3), mRNA.	NM_018327.2	8.46	7.53	-0.93	6.06
ILMN_1665372	FXYD3	FXYD domain containing ion transport regulator 3 (FXYD3), transcript variant 2, mRNA.	NM_021910.1	8.76	7.98	-0.78	6.05
ILMN_1714592	CDA	cytidine deaminase (CDA), mRNA.	NM_001785.2	10.71	10.05	-0.65	6.05
ILMN_1803945	HCP5	HLA complex P5 (HCP5), mRNA.	NM_006674.2	10.6	9.93	-0.67	6.05
ILMN_1686261	TOM1L2	target of myb1-like 2 (chicken) (TOM1L2), transcript variant 3, mRNA.	NM_001082968.1	8.28	7.49	-0.79	6.04
ILMN_1737988	PRNP	prion protein (p27-30) (Creutzfeldt-Jakob disease, Gerstmann-Strausler-Scheinker syndrome, fatal familial insomnia) (PRNP), transcript variant 3, mRNA.	NM_001080121.1	13.78	14.32	0.53	6.04
ILMN_2150851	SERPINB2	serpin peptidase inhibitor, clade B (ovalbumin), member 2 (SERPINB2), mRNA.	NM_002575.1	10.14	9.3	-0.84	6.03
ILMN_1719792	PHLDB2	pleckstrin homology-like domain, family B, member 2 (PHLDB2), mRNA.	NM_145753.1	7.63	8.64	1.01	6.03
ILMN_1823850		RST21348 Athersys RAGE Library cDNA, mRNA sequence		6.34	7.53	1.19	6.03
ILMN_2115005	FGD2	FYVE, RhoGEF and PH domain containing 2 (FGD2), mRNA.	NM_173558.2	7.34	8.19	0.85	6.01
ILMN_2160764	HBP1	HMG-box transcription factor 1 (HBP1), mRNA.	NM_012257.3	10.19	9.59	-0.59	6
ILMN_1780769	TUBB2C	tubulin, beta 2C (TUBB2C), mRNA.	NM_006088.5	11.8	12.4	0.61	6
ILMN_1655876	TMEM159	transmembrane protein 159 (TMEM159), mRNA.	NM_020422.3	10.2	9.38	-0.83	5.99
ILMN_1759670	AMACR	alpha-methylacyl-CoA racemase (AMACR), transcript variant 1, mRNA.	NM_014324.4	7.9	8.66	0.76	5.99
ILMN_2340027	TSPAN4	tetraspanin 4 (TSPAN4), transcript variant 6, mRNA.	NM_001025238.1	6.37	7.25	0.88	5.99
ILMN_1710207	C10orf6	chromosome 10 open reading frame 6 (C10orf6), mRNA.	NM_018121.2	9.87	9.22	-0.66	5.98
ILMN_1697971	TRIM38	tripartite motif-containing 38 (TRIM38), mRNA.	NM_006355.2	8.81	7.89	-0.92	5.97
ILMN_1721134	TGM1	transglutaminase 1 (K polypeptide epidermal type I, protein-glutamine-gamma-glutamyltransferase) (TGM1), mRNA.	NM_000359.2	8.86	7.98	-0.88	5.94
ILMN_2094396	LRRC8C	leucine rich repeat containing 8 family, member C (LRRC8C), mRNA.	NM_032270.2	7.24	8.3	1.05	5.93
ILMN_1757636	C5orf35	chromosome 5 open reading frame 35 (C5orf35), mRNA.	NM_153706.2	9.14	8.49	-0.65	5.92
ILMN_1693242	ZNF342	zinc finger protein 342 (ZNF342), mRNA.	NM_145288.1	9.18	8.5	-0.68	5.92
ILMN_1760174	MCCC1	methylcrotonoyl-Coenzyme A carboxylase 1 (alpha) (MCCC1), mRNA.	NM_020166.3	10.12	9.57	-0.55	5.92
ILMN_1763442	KIAA1202	KIAA1202 protein (KIAA1202), mRNA.	NM_020717.1	6.35	7.04	0.69	5.92
ILMN_1663171	MATN3	matrilin 3 (MATN3), mRNA.	NM_002381.4	5.92	6.65	0.73	5.92
ILMN_1794875	AGPAT9	1-acylglycerol-3-phosphate O-acyltransferase 9 (AGPAT9), mRNA.	NM_032717.3	7.48	6.59	-0.9	5.91
ILMN_2085760	ARPC1B	actin related protein 2/3 complex, subunit 1B, 41kDa (ARPC1B), mRNA.	NM_005720.2	9.31	9.94	0.63	5.91
ILMN_1736077	LIAS	lipoic acid synthetase (LIAS), nuclear gene encoding mitochondrial protein, transcript variant 1, mRNA.	NM_006859.2	9.54	8.58	-0.97	5.9
ILMN_1697460	REEP6	receptor accessory protein 6 (REEP6), mRNA.	NM_138393.1	8.27	7.51	-0.76	5.89
ILMN_2363361	SFXN4	sideroflexin 4 (SFXN4), transcript variant 3, mRNA.	NM_213650.1	9.73	9.03	-0.7	5.89
ILMN_2352190	CLIP2	CAP-GLY domain containing linker protein 2 (CLIP2), transcript variant 2, mRNA.	NM_032421.2	9.47	8.81	-0.66	5.89
ILMN_1666222	PHACTR3	phosphatase and actin regulator 3 (PHACTR3), transcript variant 3, mRNA.	NM_183246.1	5.96	6.71	0.76	5.89
ILMN_2318643	TGIF1	TGFB-induced factor homeobox 1 (TGIF1), transcript variant 1, mRNA.	NM_170695.2	9.27	10.11	0.84	5.89
ILMN_2093500	ZBED5	zinc finger, BED-type containing 5 (ZBED5), mRNA.	NM_021211.2	10.27	10.98	0.71	5.89
ILMN_2210601	RNASEL	ribonuclease L (2',5'-oligoisoadenylate synthetase-dependent) (RNASEL), mRNA.	NM_021133.2	9.39	8.67	-0.71	5.88
ILMN_1733519	HMGB3	high-mobility group box 3 (HMGB3), mRNA.	NM_005342.2	7.5	8.34	0.83	5.88
ILMN_1741404	MSC	musculin (activated B-cell factor-1) (MSC), mRNA.	NM_005098.3	5.67	6.34	0.67	5.88
ILMN_1795344	GOLPH4	golgi phosphoprotein 4 (GOLPH4), mRNA.	NM_014498.2	8.9	9.87	0.97	5.87
ILMN_1787813	SLC5A3	solute carrier family 5 (inositol transporters), member 3 (SLC5A3), mRNA.	NM_006933.4	7.21	6.36	-0.85	5.86
ILMN_1723481	CHST3	carbohydrate (chondroitin 6) sulfotransferase 3 (CHST3), mRNA.	NM_004273.2	7.59	8.29	0.69	5.86
ILMN_2362549	ZWINT	ZW10 interactor (ZWINT), transcript variant 3, mRNA.	NM_001005413.1	10.14	9.09	-1.05	5.85
ILMN_1720595	MDGA1	MAM domain containing glycosylphosphatidylinositol anchor 1 (MDGA1), mRNA.	NM_153487.3	8.17	8.99	0.81	5.85
ILMN_2198393	KATNA1	katanin p60 (ATPase-containing) subunit A 1 (KATNA1), mRNA.	NM_007044.2	9.77	10.42	0.66	5.84
ILMN_2352036	RTN4	reticulon 4 (RTN4), transcript variant 1, mRNA.	NM_020532.4	9.8	10.69	0.88	5.83
ILMN_2376403	TSC22D3	TSC22 domain family, member 3 (TSC22D3), transcript variant 2, mRNA.	NM_004089.3	11.8	11.03	-0.78	5.82
ILMN_2318638	TGIF1	TGFB-induced factor homeobox 1 (TGIF1), transcript variant 1, mRNA.	NM_170695.2	9.79	10.43	0.64	5.82
ILMN_2167426	ASPHD2	aspartate beta-hydroxylase domain containing 2 (ASPHD2), mRNA.	NM_020437.3	6.64	7.37	0.73	5.82
ILMN_2044226	PPP3CA	protein phosphatase 3 (formerly 2B), catalytic subunit, alpha isoform (PPP3CA), mRNA.	NM_000944.2	7.67	8.76	1.08	5.82
ILMN_1838942		we85a04.x1 Soares_NFL_T_GBC_S1 cDNA clone IMAGE:2347854 3, mRNA sequence		7.83	7.02	-0.81	5.81
ILMN_1804737	RAVER2	ribonucleoprotein, PTB-binding 2 (RAVER2), mRNA.	NM_018211.2	8.3	7.24	-1.05	5.81
ILMN_2255256	MARVELD3	MARVEL domain containing 3 (MARVELD3), transcript variant 2, mRNA.	NM_052858.3	8.62	7.81	-0.81	5.8
ILMN_1723874	MRPS6	mitochondrial ribosomal protein S6 (MRPS6), nuclear gene encoding mitochondrial protein, mRNA.	NM_032476.2	12.5	11.97	-0.54	5.8
ILMN_2380243	LOC57228	small trans-membrane and glycosylated protein (LOC57228), transcript variant 1, mRNA.	NM_001031628.1	8.16	7.35	-0.81	5.78
ILMN_2132161	KIF18A	kinesin family member 18A (KIF18A), mRNA.	NM_031217.2	7.15	6.37	-0.78	5.78
ILMN_2292646	GAD1	glutamate decarboxylase 1 (brain, 67kDa) (GAD1), transcript variant GAD67, mRNA.	NM_000817.2	9.97	10.7	0.73	5.78
ILMN_1744295	CDKN2A	cyclin-dependent kinase inhibitor 2A (melanoma, p16, inhibits CDK4) (CDKN2A), transcript variant 4, mRNA.	NM_058195.2	7.1	7.9	0.8	5.78
ILMN_1677636	COMP	cartilage oligomeric matrix protein (COMP), mRNA.	NM_000095.2	5.6	6.38	0.78	5.77
ILMN_1667994	AMD1	adenosylmethionine decarboxylase 1 (AMD1), transcript variant 1, mRNA.	NM_001634.4	8.58	9.6	1.02	5.76
ILMN_2264205	ZBTB8	zinc finger and BTB domain containing 8 (ZBTB8), mRNA. XM_945039	NM_001040441.1	8.14	8.99	0.85	5.75
ILMN_1688480	CCND1	cyclin D1 (CCND1), mRNA.	NM_053056.2	13.36	13.93	0.57	5.74
ILMN_1788239	AMDHD1	amidohydrolase domain containing 1 (AMDHD1), mRNA.	NM_152435.1	7.25	6.45	-0.8	5.73
ILMN_2312194	CYB5A	cytochrome b5 type A (microsomal) (CYB5A), transcript variant 2, mRNA.	NM_001914.2	11	10.22	-0.79	5.73
ILMN_1715680	NEIL2	nei like 2 (E. coli) (NEIL2), mRNA.	NM_145043.1	7.24	6.41	-0.84	5.73
ILMN_1746343	LOC643985	PREDICTED: hypothetical protein LOC643985 (LOC643985), mRNA.	XM_927235.1	7.52	6.71	-0.81	5.73
ILMN_1909770		cDNA: FLJ21199 fis, clone COL00235		7.4	8.3	0.9	5.73
ILMN_1688178	CGI-96	CGI-96 protein (CGI-96), mRNA.	NM_015703.3	9.01	9.72	0.71	5.73
ILMN_1782247	GCN5L2	GCN5 general control of amino-acid synthesis 5-like 2 (yeast) (GCN5L2), mRNA.	NM_021078.2	11.22	10.64	-0.58	5.72
ILMN_1722834	RGS12	regulator of G-protein signaling 12 (RGS12), transcript variant 2, mRNA.	NM_002926.3	10.05	10.66	0.61	5.72
ILMN_1902929		cDNA clone IMAGE:5268658		7.82	7.13	-0.69	5.71
ILMN_1660199	ACAA2	acetyl-Coenzyme A acyltransferase 2 (mitochondrial 3-oxoacyl-Coenzyme A thiolase) (ACAA2), nuclear gene encoding mitochondrial protein, mRNA.	NM_006111.1	6.35	7.19	0.84	5.7
ILMN_1777446	LOC647987	PREDICTED: similar to Ribosome biogenesis protein BMS1 homolog (LOC647987), mRNA.	XM_937044.1	6.4	7.24	0.84	5.69
ILMN_2049184	DNASE1L3	deoxyribonuclease I-like 3 (DNASE1L3), mRNA.	NM_004944.2	6.72	5.91	-0.81	5.68
ILMN_1783610	HELLS	helicase, lymphoid-specific (HELLS), mRNA.	NM_018063.3	7.24	6.25	-0.99	5.68
ILMN_1712950	PFN1	profilin 1 (PFN1), mRNA.	NM_005022.2	11.96	12.63	0.67	5.68
ILMN_2124471	SLC36A1	solute carrier family 36 (proton/amino acid symporter), member 1 (SLC36A1), mRNA.	NM_078483.2	7.79	8.7	0.91	5.66
ILMN_1784678	PBX1	pre-B-cell leukemia homeobox 1 (PBX1), mRNA.	NM_002585.1	8.69	8.03	-0.65	5.65
ILMN_1756992	MUC1	mucin 1, cell surface associated (MUC1), transcript variant 6, mRNA.	NM_001044391.1	9.87	9.25	-0.61	5.64
ILMN_1719286	CTSA	cathepsin A (CTSA), mRNA.	NM_000308.2	10.6	9.99	-0.61	5.64
ILMN_1738558	RGS20	regulator of G-protein signaling 20 (RGS20), transcript variant 1, mRNA.	NM_170587.1	9.99	10.57	0.58	5.64
ILMN_1657153	ACTR3	ARP3 actin-related protein 3 homolog (yeast) (ACTR3), mRNA.	NM_005721.3	10.16	10.83	0.67	5.64
ILMN_1664283	C9orf75	chromosome 9 open reading frame 75 (C9orf75), mRNA.	NM_173691.2	8.27	7.5	-0.77	5.63
ILMN_1691892	TAGLN2	transgelin 2 (TAGLN2), mRNA.	NM_003564.1	9.06	9.77	0.72	5.63
ILMN_1776602	RNASE4	ribonuclease, RNase A family, 4 (RNASE4), transcript variant 3, mRNA.	NM_194431.1	8.42	7.74	-0.68	5.62
ILMN_1778709	PICALM	phosphatidylinositol binding clathrin assembly protein (PICALM), transcript variant 1, mRNA.	NM_007166.2	6.52	7.39	0.86	5.62
ILMN_2387471	FLJ22184	hypothetical protein FLJ22184 (FLJ22184), mRNA.	NM_001080403.1	7.4	6.53	-0.87	5.61
ILMN_2133100	LPIN2	lipin 2 (LPIN2), mRNA.	NM_014646.2	7.59	8.38	0.79	5.59
ILMN_1776631	KIAA1862	KIAA1862 protein (KIAA1862), mRNA.	NM_032534.1	6.8	7.64	0.85	5.58
ILMN_1723212	SFRS3	splicing factor, arginine/serine-rich 3 (SFRS3), mRNA.	NM_003017.3	8.66	9.37	0.71	5.58
ILMN_1768637	TNNI3	troponin I type 3 (cardiac) (TNNI3), mRNA.	NM_000363.3	7.23	6.43	-0.8	5.57
ILMN_1698484	RHOV	ras homolog gene family, member V (RHOV), mRNA.	NM_133639.2	6.59	5.81	-0.79	5.57
ILMN_1904596		xd95a11.x1 Soares_NFL_T_GBC_S1 cDNA clone IMAGE:2605340 3, mRNA sequence		5.76	6.34	0.58	5.57
ILMN_1783998	STARD5	StAR-related lipid transfer (START) domain containing 5 (STARD5), mRNA.	NM_181900.2	7.91	6.91	-1	5.56
ILMN_1687275	JUB	jub, ajuba homolog (Xenopus laevis) (JUB), transcript variant 1, mRNA.	NM_032876.4	8.13	9.07	0.93	5.56
ILMN_2195236	PGRMC2	progesterone receptor membrane component 2 (PGRMC2), mRNA.	NM_006320.1	12.56	13.18	0.61	5.56
ILMN_1698100	ANXA2P1	annexin A2 pseudogene 1 (ANXA2P1) on chromosome 4.	NR_001562.1	12.12	13.16	1.04	5.56
ILMN_2375002	MAP4K4	mitogen-activated protein kinase kinase kinase kinase 4 (MAP4K4), transcript variant 3, mRNA.	NM_145687.2	7.55	8.22	0.67	5.56
ILMN_1732923	SIPA1L2	signal-induced proliferation-associated 1 like 2 (SIPA1L2), mRNA.	NM_020808.3	8.01	7.4	-0.61	5.55
ILMN_1699644	39875	PREDICTED: membrane-associated ring finger (C3HC4) 3 (MARCH3), mRNA.	XM_001127871.1	8.18	8.91	0.73	5.55
ILMN_1749044	PVRL4	poliovirus receptor-related 4 (PVRL4), mRNA.	NM_030916.1	6.92	6.04	-0.88	5.54
ILMN_1676036	LOC649679	PREDICTED: similar to Tubulin beta-4q chain, transcript variant 2 (LOC649679), mRNA.	XM_945045.1	8.26	9.04	0.77	5.54
ILMN_1733831	PGBD5	piggyBac transposable element derived 5 (PGBD5), mRNA.	NM_024554.2	5.83	6.68	0.85	5.53
ILMN_1778587	PPP2R2D	protein phosphatase 2, regulatory subunit B, delta isoform (PPP2R2D), transcript variant 2, mRNA.	NM_001003656.1	9.78	10.3	0.51	5.53
ILMN_1777519	ITGB7	integrin, beta 7 (ITGB7), mRNA.	NM_000889.1	7.86	7.16	-0.7	5.51
ILMN_2043809	PFKM	phosphofructokinase, muscle (PFKM), mRNA.	NM_000289.3	9.25	8.63	-0.62	5.51
ILMN_1747968	RBM33	RNA binding motif protein 33 (RBM33), transcript variant 1, mRNA.	NM_001008408.3	10.3	9.74	-0.56	5.51
ILMN_1810431	LOC642299	PREDICTED: hypothetical protein LOC642299 (LOC642299), mRNA.	XM_930677.1	9.63	8.54	-1.09	5.51
ILMN_1815745	SOX4	SRY (sex determining region Y)-box 4 (SOX4), mRNA.	NM_003107.2	8.38	9.3	0.91	5.5
ILMN_1740685	LOC652541	PREDICTED: hypothetical protein LOC652541 (LOC652541), mRNA.	XM_942032.1	8.23	7.61	-0.62	5.49
ILMN_1737255	C22orf36	chromosome 22 open reading frame 36 (C22orf36), mRNA.	NM_207644.2	8.55	9.23	0.68	5.48
ILMN_2330307	SLC43A3	solute carrier family 43, member 3 (SLC43A3), mRNA.	NM_017611.2	7.34	6.52	-0.82	5.47
ILMN_1732296	ID3	inhibitor of DNA binding 3, dominant negative helix-loop-helix protein (ID3), mRNA.	NM_002167.2	12.31	11.65	-0.66	5.47
ILMN_1653466	HES4	hairy and enhancer of split 4 (Drosophila) (HES4), mRNA.	NM_021170.2	11.77	11.17	-0.59	5.46
ILMN_1707286	FLJ22662	hypothetical protein FLJ22662 (FLJ22662), mRNA.	NM_024829.4	8.32	7.36	-0.95	5.45
ILMN_1728645	LOC649095	PREDICTED: hypothetical LOC649095 (LOC649095), mRNA.	XM_001131851.1	7.58	6.9	-0.69	5.45
ILMN_1814589	LOC728037	PREDICTED: similar to Kinesin-like protein KIF22 (Kinesin-like DNA-binding protein) (Kinesin-like protein 4) (LOC728037), mRNA.	XR_015190.1	7.85	7.2	-0.66	5.45
ILMN_1688041	TMEM53	transmembrane protein 53 (TMEM53), mRNA.	NM_024587.2	7.28	6.59	-0.7	5.45
ILMN_1674740	LOC651876	PREDICTED: hypothetical protein LOC651876 (LOC651876), mRNA.	XM_944986.1	8	8.79	0.79	5.45
ILMN_1754795	FAT	FAT tumor suppressor homolog 1 (Drosophila) (FAT), mRNA.	NM_005245.3	10.58	11.25	0.67	5.45
ILMN_1908274		xn24e12.x1 NCI_CGAP_Kid11 cDNA clone IMAGE:2694670 3, mRNA sequence		7.68	6.95	-0.73	5.44
ILMN_2215824	ANKRD20A1	ankyrin repeat domain 20 family, member A1 (ANKRD20A1), mRNA.	NM_032250.1	8.95	8.16	-0.8	5.44
ILMN_1695852	C5orf38	chromosome 5 open reading frame 38 (C5orf38), mRNA.	NM_178569.2	6.79	6.12	-0.67	5.44
ILMN_1743207	LOC391692	PREDICTED: similar to tubulin, beta 8 (LOC391692), mRNA.	XM_373031.3	6.95	7.65	0.71	5.44
ILMN_2214355	RAB30	RAB30, member RAS oncogene family (RAB30), mRNA.	NM_014488.3	6.88	7.73	0.85	5.43
ILMN_1773935	TMEM165	transmembrane protein 165 (TMEM165), mRNA.	NM_018475.2	7.68	8.46	0.77	5.42
ILMN_1669390	PPP1R13L	protein phosphatase 1, regulatory (inhibitor) subunit 13 like (PPP1R13L), mRNA.	NM_006663.2	9.57	10.38	0.81	5.42
ILMN_2397602	ERBB3	v-erb-b2 erythroblastic leukemia viral oncogene homolog 3 (avian) (ERBB3), transcript variant s, mRNA.	NM_001005915.1	6.78	6.05	-0.74	5.41
ILMN_1756501	ST6GAL1	ST6 beta-galactosamide alpha-2,6-sialyltranferase 1 (ST6GAL1), transcript variant 2, mRNA.	NM_003032.2	9.14	8.47	-0.68	5.41
ILMN_1699623	FAM81A	family with sequence similarity 81, member A (FAM81A), mRNA.	NM_152450.2	6.58	5.82	-0.76	5.4
ILMN_2227968	NTHL1	nth endonuclease III-like 1 (E. coli) (NTHL1), mRNA.	NM_002528.4	8.93	8.06	-0.87	5.4
ILMN_1789171	EEF2K	eukaryotic elongation factor-2 kinase (EEF2K), mRNA.	NM_013302.3	10.47	9.87	-0.6	5.39
ILMN_1683441	NCAPD3	non-SMC condensin II complex, subunit D3 (NCAPD3), mRNA.	NM_015261.2	8.07	7.25	-0.82	5.37
ILMN_1787691	CITED4	Cbp/p300-interacting transactivator, with Glu/Asp-rich carboxy-terminal domain, 4 (CITED4), mRNA.	NM_133467.2	10.12	10.74	0.61	5.36
ILMN_2298818	RPS29	ribosomal protein S29 (RPS29), transcript variant 2, mRNA.	NM_001030001.1	10.09	9.39	-0.7	5.34
ILMN_1806502	ZNF165	zinc finger protein 165 (ZNF165), mRNA.	NM_003447.2	8.22	7.61	-0.61	5.34
ILMN_1880215		UI-H-BI1-acd-c-07-0-UI.s1 NCI_CGAP_Sub3 cDNA clone IMAGE:2713741 3, mRNA sequence		8.63	7.6	-1.03	5.34
ILMN_1726839	DCUN1D5	DCN1, defective in cullin neddylation 1, domain containing 5 (S. cerevisiae) (DCUN1D5), mRNA.	NM_032299.2	10.88	11.39	0.51	5.34
ILMN_1673773	GALNTL4	UDP-N-acetyl-alpha-D-galactosamine:polypeptide N-acetylgalactosaminyltransferase-like 4 (GALNTL4), mRNA.	NM_198516.1	9.71	10.34	0.63	5.34
ILMN_1814305	SAMD9	sterile alpha motif domain containing 9 (SAMD9), mRNA.	NM_017654.2	11.71	11.07	-0.64	5.33
ILMN_1775170	MT1X	metallothionein 1X (MT1X), mRNA.	NM_005952.2	12.61	12	-0.62	5.32
ILMN_1679464	BNC1	basonuclin 1 (BNC1), mRNA.	NM_001717.2	7.63	8.41	0.78	5.32
ILMN_1657554	TSPYL2	TSPY-like 2 (TSPYL2), mRNA.	NM_022117.1	8.23	7.46	-0.77	5.31
ILMN_1655642	FANCI	Fanconi anemia, complementation group I (FANCI), transcript variant 2, mRNA.	NM_018193.2	9.14	8.15	-0.99	5.3
ILMN_2329744	PMS2	PMS2 postmeiotic segregation increased 2 (S. cerevisiae) (PMS2), transcript variant 1, mRNA.	NM_000535.4	7.44	6.68	-0.77	5.3
ILMN_2090004	AQP10	aquaporin 10 (AQP10), mRNA.	NM_080429.2	6.16	6.87	0.72	5.3
ILMN_1744268	PLEC1	plectin 1, intermediate filament binding protein 500kDa (PLEC1), transcript variant 1, mRNA.	NM_000445.2	8.21	9.01	0.79	5.3
ILMN_2384807	LRRCC1	leucine rich repeat and coiled-coil domain containing 1 (LRRCC1), transcript variant 1, mRNA.	NM_033402.3	7.72	6.81	-0.91	5.29
ILMN_1706498	DSE	dermatan sulfate epimerase (DSE), transcript variant 1, mRNA.	NM_013352.2	11.49	12.07	0.57	5.29
ILMN_1778360	PYGB	phosphorylase, glycogen; brain (PYGB), mRNA.	NM_002862.3	10.32	10.91	0.59	5.29
ILMN_1708110	TMEM144	transmembrane protein 144 (TMEM144), mRNA.	NM_018342.3	7.01	6.19	-0.81	5.28
ILMN_1696432	IDH1	isocitrate dehydrogenase 1 (NADP+), soluble (IDH1), mRNA.	NM_005896.2	10.73	9.84	-0.89	5.27
ILMN_2383349	STEAP3	STEAP family member 3 (STEAP3), transcript variant 2, mRNA.	NM_018234.2	11.07	10.52	-0.55	5.26
ILMN_1746618	PAQR7	progestin and adipoQ receptor family member VII (PAQR7), mRNA.	NM_178422.4	10.18	9.34	-0.84	5.26
ILMN_1725338	CLDN23	claudin 23 (CLDN23), mRNA.	NM_194284.2	7.88	8.55	0.67	5.26
ILMN_1655733	RFC2	replication factor C (activator 1) 2, 40kDa (RFC2), transcript variant 1, mRNA.	NM_181471.1	8.43	7.66	-0.76	5.25
ILMN_2347349	CCNB1IP1	cyclin B1 interacting protein 1 (CCNB1IP1), transcript variant 3, mRNA.	NM_182851.1	11.25	10.64	-0.61	5.25
ILMN_1661197	CLCF1	cardiotrophin-like cytokine factor 1 (CLCF1), mRNA.	NM_013246.2	7.89	8.6	0.72	5.25
ILMN_1751656	KLF11	PREDICTED: Kruppel-like factor 11 (KLF11), mRNA.	XM_001129527.1	7.1	7.94	0.84	5.25
ILMN_1801118	C16orf33	chromosome 16 open reading frame 33 (C16orf33), mRNA.	NM_024571.2	10.08	9.51	-0.57	5.24
ILMN_1658027	RAD54L	RAD54-like (S. cerevisiae) (RAD54L), mRNA.	NM_003579.2	7.12	6.36	-0.76	5.24
ILMN_2264681	LETMD1	LETM1 domain containing 1 (LETMD1), transcript variant 1, mRNA.	NM_015416.3	8.59	7.75	-0.83	5.23
ILMN_1732873	IPPK	inositol 1,3,4,5,6-pentakisphosphate 2-kinase (IPPK), mRNA.	NM_022755.4	7.52	8.21	0.69	5.22
ILMN_1678087	MAP3K4	mitogen-activated protein kinase kinase kinase 4 (MAP3K4), transcript variant 1, mRNA.	NM_005922.2	10.69	11.27	0.58	5.22
ILMN_1803192	WDR76	WD repeat domain 76 (WDR76), mRNA.	NM_024908.2	6.64	5.88	-0.76	5.21
ILMN_2163723	KRT7	keratin 7 (KRT7), mRNA.	NM_005556.3	11.42	12.04	0.62	5.21
ILMN_1705231	SLCO2A1	solute carrier organic anion transporter family, member 2A1 (SLCO2A1), mRNA.	NM_005630.1	7.14	7.83	0.69	5.19
ILMN_1791232	SPRED2	sprouty-related, EVH1 domain containing 2 (SPRED2), mRNA.	NM_181784.1	7.56	8.28	0.71	5.19
ILMN_1711368	NIBP	NIK and IKK{beta} binding protein (NIBP), mRNA.	NM_031466.4	7.2	6.59	-0.6	5.18
ILMN_1686152	GGA2	golgi associated, gamma adaptin ear containing, ARF binding protein 2 (GGA2), mRNA.	NM_015044.3	9.85	9.31	-0.54	5.18
ILMN_1651347	SERTAD2	SERTA domain containing 2 (SERTAD2), mRNA.	NM_014755.1	11.28	10.76	-0.51	5.17
ILMN_1761000	ASAH3L	N-acylsphingosine amidohydrolase 3-like (ASAH3L), mRNA.	NM_001010887.2	6.84	6.07	-0.77	5.17
ILMN_2353161	MSLN	mesothelin (MSLN), transcript variant 2, mRNA.	NM_013404.3	7.38	6.74	-0.64	5.17
ILMN_1911605		mRNA; cDNA DKFZp686I05206 (from clone DKFZp686I05206)		8.97	9.64	0.67	5.17
ILMN_1671791	PCK2	phosphoenolpyruvate carboxykinase 2 (mitochondrial) (PCK2), nuclear gene encoding mitochondrial protein, transcript variant 1, mRNA.	NM_004563.2	10.25	10.93	0.68	5.17
ILMN_1757440	FAM69B	PREDICTED: family with sequence similarity 69, member B (FAM69B), mRNA.	XM_001130258.1	6.88	6.24	-0.64	5.16
ILMN_1807283	NDST1	N-deacetylase/N-sulfotransferase (heparan glucosaminyl) 1 (NDST1), mRNA.	NM_001543.3	8.35	9.09	0.75	5.16
ILMN_1670970	PPP3CA	protein phosphatase 3 (formerly 2B), catalytic subunit, alpha isoform (PPP3CA), mRNA.	NM_000944.3	7.31	8.17	0.86	5.15
ILMN_1807114	LOC255620	PREDICTED: similar to unc-93 homolog B1, transcript variant 1 (LOC255620), mRNA.	XM_173132.4	6.69	6.01	-0.68	5.13
ILMN_1736628	ORAI3	ORAI calcium release-activated calcium modulator 3 (ORAI3), mRNA.	NM_152288.1	7.34	6.72	-0.61	5.13
ILMN_1744980	ZCCHC7	zinc finger, CCHC domain containing 7 (ZCCHC7), mRNA.	NM_032226.2	8.85	8.17	-0.68	5.13
ILMN_1797604	CAP1	CAP, adenylate cyclase-associated protein 1 (yeast) (CAP1), mRNA.	NM_006367.2	12.33	13.06	0.73	5.13
ILMN_1690894	TRA1P2	PREDICTED: tumor rejection antigen (gp96) 1 pseudogene 2 (TRA1P2), misc RNA.	XR_000203.3	7.89	8.69	0.8	5.13
ILMN_1716766	CEBPG	CCAAT/enhancer binding protein (C/EBP), gamma (CEBPG), mRNA.	NM_001806.2	8.63	9.31	0.68	5.12
ILMN_2111932	SERINC2	serine incorporator 2 (SERINC2), mRNA.	NM_178865.3	9.75	10.37	0.62	5.12
ILMN_1710170	PPAP2C	phosphatidic acid phosphatase type 2C (PPAP2C), transcript variant 2, mRNA.	NM_177526.1	8.04	7.28	-0.76	5.11
ILMN_1655796	39875	PREDICTED: membrane-associated ring finger (C3HC4) 3 (MARCH3), mRNA.	XM_001127871.1	7.98	8.73	0.75	5.09
ILMN_1731224	PARP9	poly (ADP-ribose) polymerase family, member 9 (PARP9), mRNA.	NM_031458.1	9.49	8.59	-0.89	5.08
ILMN_2396875	IGFBP3	insulin-like growth factor binding protein 3 (IGFBP3), transcript variant 1, mRNA.	NM_001013398.1	10.95	10.26	-0.68	5.07
ILMN_1802292	WDFY2	WD repeat and FYVE domain containing 2 (WDFY2), mRNA.	NM_052950.2	8.75	9.3	0.55	5.06
ILMN_1728478	CXCL16	chemokine (C-X-C motif) ligand 16 (CXCL16), mRNA.	NM_022059.1	11.31	10.75	-0.56	5.05
ILMN_2412860	MCM4	minichromosome maintenance complex component 4 (MCM4), transcript variant 2, mRNA.	NM_182746.1	9.51	8.7	-0.81	5.05
ILMN_1703593	BAIAP2L1	BAI1-associated protein 2-like 1 (BAIAP2L1), mRNA.	NM_018842.3	10.67	11.19	0.52	5.05
ILMN_1677765	LRP8	low density lipoprotein receptor-related protein 8, apolipoprotein e receptor (LRP8), transcript variant 3, mRNA.	NM_017522.3	7.85	8.67	0.83	5.05
ILMN_1757350	CTNNB1	catenin (cadherin-associated protein), beta 1, 88kDa (CTNNB1), mRNA.	NM_001098209.1	8.46	9.1	0.65	5.05
ILMN_2179778	PHLDB2	pleckstrin homology-like domain, family B, member 2 (PHLDB2), mRNA.	NM_145753.1	8.75	9.63	0.88	5.04
ILMN_1757736	IRX5	iroquois homeobox 5 (IRX5), mRNA.	NM_005853.5	9.56	8.9	-0.65	5.03
ILMN_1748707	CRELD2	cysteine-rich with EGF-like domains 2 (CRELD2), mRNA.	NM_024324.2	10.11	10.79	0.68	5.03
ILMN_1692664	PRR5	proline rich 5 (renal) (PRR5), transcript variant 5, mRNA.	NM_001017529.1	8.79	8.21	-0.58	5.02
ILMN_1698772	KRT6B	keratin 6B (KRT6B), mRNA.	NM_005555.3	10.53	11.23	0.7	5.02
ILMN_1720322	PTS	6-pyruvoyltetrahydropterin synthase (PTS), mRNA.	NM_000317.1	9.84	10.45	0.61	5.02
ILMN_2183856	TSPAN6	tetraspanin 6 (TSPAN6), mRNA.	NM_003270.2	7.84	7.27	-0.57	5.01
ILMN_2336130	SULT1A4	sulfotransferase family, cytosolic, 1A, phenol-preferring, member 4 (SULT1A4), transcript variant 3, mRNA.	NM_001017391.1	9.42	8.68	-0.74	5.01
ILMN_1669605	LOC646609	PREDICTED: similar to Chloride intracellular channel protein 4 (Intracellular chloride ion channel protein p64H1) (LOC646609), mRNA.	XM_929546.1	6.08	6.8	0.72	5.01
ILMN_1780825	RRAS	related RAS viral (r-ras) oncogene homolog (RRAS), mRNA.	NM_006270.3	10.55	11.08	0.53	5.01
ILMN_1796210	PPRC1	peroxisome proliferator-activated receptor gamma, coactivator-related 1 (PPRC1), mRNA.	NM_015062.3	9.21	9.84	0.63	5
ILMN_1813374	C19orf28	chromosome 19 open reading frame 28 (C19orf28), transcript variant 3, mRNA.	NM_174983.3	6.65	7.4	0.75	5
ILMN_1764654	LOC647993	PREDICTED: hypothetical protein LOC647993 (LOC647993), mRNA.	XM_937048.1	5.84	6.63	0.79	5
ILMN_1777060	CTH	cystathionase (cystathionine gamma-lyase) (CTH), transcript variant 1, mRNA.	NM_001902.4	6.71	6.17	-0.54	4.99
ILMN_2387078	MPZL2	myelin protein zero-like 2 (MPZL2), transcript variant 2, mRNA.	NM_144765.1	9.84	9	-0.84	4.99
ILMN_1717262	PROCR	protein C receptor, endothelial (EPCR) (PROCR), mRNA.	NM_006404.3	7.87	8.63	0.76	4.99
ILMN_2110167	POLR1E	polymerase (RNA) I polypeptide E, 53kDa (POLR1E), mRNA.	NM_022490.1	9.61	8.89	-0.72	4.97
ILMN_1746836	PTAFR	platelet-activating factor receptor (PTAFR), mRNA.	NM_000952.3	7.2	6.29	-0.91	4.97
ILMN_2363634	ADHFE1	alcohol dehydrogenase, iron containing, 1 (ADHFE1), transcript variant 1, mRNA.	NM_001077593.1	7.76	6.92	-0.83	4.97
ILMN_1821176		601441142F1 NIH_MGC_72 cDNA clone IMAGE:3915971 5, mRNA sequence		6.53	5.9	-0.63	4.97
ILMN_1714599	CAMLG	calcium modulating ligand (CAMLG), mRNA.	NM_001745.2	12.79	12.28	-0.5	4.97
ILMN_1662243	ING1	inhibitor of growth family, member 1 (ING1), transcript variant 1, mRNA.	NM_198219.1	7.72	7.06	-0.66	4.97
ILMN_1767992	SLC12A6	solute carrier family 12 (potassium/chloride transporters), member 6 (SLC12A6), transcript variant 5, mRNA.	NM_001042496.1	7.2	6.59	-0.62	4.97
ILMN_1708798	EAF2	ELL associated factor 2 (EAF2), mRNA.	NM_018456.4	8.1	8.88	0.78	4.97
ILMN_1784356	TTLL11	tubulin tyrosine ligase-like family, member 11 (TTLL11), mRNA.	NM_194252.1	6.91	7.57	0.66	4.97
ILMN_1666553	SLC25A19	solute carrier family 25 (mitochondrial thiamine pyrophosphate carrier), member 19 (SLC25A19), nuclear gene encoding mitochondrial protein, mRNA.	NM_021734.3	8.53	7.39	-1.14	4.94
ILMN_1798582	GRB7	growth factor receptor-bound protein 7 (GRB7), transcript variant 1, mRNA.	NM_005310.2	6.78	5.93	-0.86	4.94
ILMN_2106449	PLEKHF2	pleckstrin homology domain containing, family F (with FYVE domain) member 2 (PLEKHF2), mRNA.	NM_024613.2	8.94	8.25	-0.69	4.94
ILMN_1806328	PDIK1L	PDLIM1 interacting kinase 1 like (PDIK1L), mRNA.	NM_152835.2	7.17	6.36	-0.81	4.94
ILMN_1774287	CFB	complement factor B (CFB), mRNA.	NM_001710.4	6.82	6.18	-0.64	4.92
ILMN_2085722	ING2	inhibitor of growth family, member 2 (ING2), mRNA.	NM_001564.2	8.78	8.2	-0.59	4.92
ILMN_2202637	CRY1	cryptochrome 1 (photolyase-like) (CRY1), mRNA.	NM_004075.2	9.34	10.03	0.69	4.92
ILMN_2374425	CCNE1	cyclin E1 (CCNE1), transcript variant 1, mRNA.	NM_001238.1	7.23	6.4	-0.84	4.91
ILMN_2183938	LEMD3	LEM domain containing 3 (LEMD3), mRNA.	NM_014319.3	10.18	10.76	0.58	4.9
ILMN_1697817	PANX1	pannexin 1 (PANX1), mRNA.	NM_015368.3	7.66	8.41	0.75	4.9
ILMN_1693410	BRI3BP	PREDICTED: BRI3 binding protein (BRI3BP), mRNA.	XM_941876.1	9.67	8.96	-0.71	4.89
ILMN_1671731	AVPI1	arginine vasopressin-induced 1 (AVPI1), mRNA.	NM_021732.1	11.82	11.31	-0.51	4.89
ILMN_1699809	CAPNS2	calpain, small subunit 2 (CAPNS2), mRNA.	NM_032330.1	10.98	10.21	-0.78	4.89
ILMN_1679051	PTPRR	protein tyrosine phosphatase, receptor type, R (PTPRR), transcript variant 1, mRNA.	NM_002849.2	7	7.97	0.97	4.88
ILMN_1715175	MET	met proto-oncogene (hepatocyte growth factor receptor) (MET), mRNA.	NM_000245.2	6.5	7.37	0.87	4.87
ILMN_2062468	IGFBP7	insulin-like growth factor binding protein 7 (IGFBP7), mRNA.	NM_001553.1	9.85	10.37	0.52	4.87
ILMN_1769734	NT5C3	5'-nucleotidase, cytosolic III (NT5C3), transcript variant 1, mRNA.	NM_001002010.1	10.17	9.58	-0.59	4.84
ILMN_2357438	AURKA	aurora kinase A (AURKA), transcript variant 3, mRNA.	NM_198434.1	10.27	9.75	-0.53	4.83
ILMN_1812559	SLC7A6	solute carrier family 7 (cationic amino acid transporter, y+ system), member 6 (SLC7A6), transcript variant 2, mRNA.	NM_001076785.1	8.39	9.1	0.71	4.83
ILMN_1750100	TUBB4Q	tubulin, beta polypeptide 4, member Q (TUBB4Q), mRNA.	NM_020040.3	8.64	9.41	0.76	4.82
ILMN_2090105	TAGLN2	transgelin 2 (TAGLN2), mRNA.	NM_003564.1	11.38	12.06	0.68	4.82
ILMN_1773006	FABP4	fatty acid binding protein 4, adipocyte (FABP4), mRNA.	NM_001442.1	6.15	7.15	1	4.8
ILMN_1709307	GPSM1	PREDICTED: G-protein signalling modulator 1 (AGS3-like, C. elegans) (GPSM1), mRNA.	XM_939186.2	8.83	9.37	0.54	4.8
ILMN_1739641	MTMR3	myotubularin related protein 3 (MTMR3), transcript variant 3, mRNA.	NM_021090.3	9.83	10.37	0.54	4.8
ILMN_2200917	SLC4A7	solute carrier family 4, sodium bicarbonate cotransporter, member 7 (SLC4A7), mRNA.	NM_003615.2	8.21	8.85	0.64	4.8
ILMN_2302358	ABCC5	ATP-binding cassette, sub-family C (CFTR/MRP), member 5 (ABCC5), transcript variant 2, mRNA.	NM_001023587.1	6.8	5.99	-0.81	4.78
ILMN_1689070	COQ7	coenzyme Q7 homolog, ubiquinone (yeast) (COQ7), mRNA.	NM_016138.3	7.42	6.81	-0.61	4.78
ILMN_1800220	KCTD3	potassium channel tetramerisation domain containing 3 (KCTD3), mRNA.	NM_016121.3	9.83	8.82	-1.01	4.78
ILMN_2379718	RAB24	RAB24, member RAS oncogene family (RAB24), transcript variant 1, mRNA.	NM_001031677.2	9.06	8.29	-0.77	4.77
ILMN_1757287	MAPK6	mitogen-activated protein kinase 6 (MAPK6), mRNA.	NM_002748.2	10.81	11.52	0.71	4.77
ILMN_1757237	DDEF2	development and differentiation enhancing factor 2 (DDEF2), mRNA.	NM_003887.1	8.69	9.47	0.78	4.77
ILMN_1736005	NCAPH2	non-SMC condensin II complex, subunit H2 (NCAPH2), transcript variant 2, mRNA.	NM_152299.2	6.79	6.11	-0.68	4.76
ILMN_2356578	TH	tyrosine hydroxylase (TH), transcript variant 2, mRNA.	NM_000360.3	6.5	5.86	-0.64	4.76
ILMN_1682572	KIAA0528	KIAA0528 (KIAA0528), mRNA.	NM_014802.1	10.17	9.47	-0.7	4.74
ILMN_1859207		AV727190 HTC cDNA clone HTCAQG06 5, mRNA sequence		8.51	7.84	-0.67	4.72
ILMN_2352097	GPR56	G protein-coupled receptor 56 (GPR56), transcript variant 2, mRNA.	NM_201524.1	12.88	13.43	0.55	4.72
ILMN_1737005	C19orf61	chromosome 19 open reading frame 61 (C19orf61), mRNA.	NM_019108.2	7.24	7.95	0.7	4.7
ILMN_2398403	TCEAL1	transcription elongation factor A (SII)-like 1 (TCEAL1), transcript variant 2, mRNA.	NM_001006639.1	9.84	10.53	0.69	4.69
ILMN_1806030	PPL	periplakin (PPL), mRNA.	NM_002705.4	9.87	9.26	-0.61	4.68
ILMN_1737561	LOC88523	CG016 (LOC88523), mRNA.	NM_033111.2	10.53	9.91	-0.62	4.68
ILMN_1758907	UGT1A6	UDP glucuronosyltransferase 1 family, polypeptide A6 (UGT1A6), transcript variant 1, mRNA.	NM_001072.3	7.95	8.55	0.6	4.68
ILMN_1669617	GRB10	growth factor receptor-bound protein 10 (GRB10), transcript variant 4, mRNA.	NM_001001555.1	6.44	7.12	0.68	4.68
ILMN_1741755	TRIM29	tripartite motif-containing 29 (TRIM29), mRNA.	NM_012101.3	11.2	10.67	-0.53	4.67
ILMN_1733157	THSD1	thrombospondin, type I, domain containing 1 (THSD1), transcript variant 1, mRNA.	NM_018676.2	5.91	6.58	0.67	4.67
ILMN_1743714	CARD10	caspase recruitment domain family, member 10 (CARD10), mRNA.	NM_014550.3	10.54	11.07	0.52	4.67
ILMN_1772486	ELF2	E74-like factor 2 (ets domain transcription factor) (ELF2), transcript variant 2, mRNA.	NM_006874.2	8.83	8.11	-0.71	4.66
ILMN_1736327	CDC42EP3	CDC42 effector protein (Rho GTPase binding) 3 (CDC42EP3), mRNA.	NM_006449.3	6.54	7.36	0.82	4.66
ILMN_2171295	PFTK1	PFTAIRE protein kinase 1 (PFTK1), mRNA.	NM_012395.2	6.32	7.36	1.04	4.66
ILMN_2370976	FER1L3	fer-1-like 3, myoferlin (C. elegans) (FER1L3), transcript variant 1, mRNA.	NM_013451.2	11.35	10.69	-0.66	4.64
ILMN_1710220	LOC729985	PREDICTED: similar to CDC42-binding protein kinase beta (LOC729985), mRNA.	XM_001131964.1	8.28	7.61	-0.67	4.64
ILMN_1729208	NGFRAP1	nerve growth factor receptor (TNFRSF16) associated protein 1 (NGFRAP1), transcript variant 1, mRNA.	NM_206917.1	9.21	8.52	-0.69	4.64
ILMN_1658483	IL1A	interleukin 1, alpha (IL1A), mRNA.	NM_000575.3	6.1	6.8	0.7	4.64
ILMN_1655684	SARS2	seryl-tRNA synthetase 2, mitochondrial (SARS2), nuclear gene encoding mitochondrial protein, mRNA.	NM_017827.2	8.88	8.17	-0.71	4.63
ILMN_1652407	ZMYND8	zinc finger, MYND-type containing 8 (ZMYND8), transcript variant 1, mRNA.	NM_183047.1	8.56	7.47	-1.09	4.63
ILMN_1708983	CASC1	cancer susceptibility candidate 1 (CASC1), transcript variant 3, mRNA.	NM_001082972.1	6.47	5.79	-0.69	4.63
ILMN_2324561	SLC7A6	solute carrier family 7 (cationic amino acid transporter, y+ system), member 6 (SLC7A6), transcript variant 2, mRNA.	NM_001076785.1	8.25	8.96	0.7	4.63
ILMN_1805750	IFITM3	interferon induced transmembrane protein 3 (1-8U) (IFITM3), mRNA.	NM_021034.2	11.82	11.31	-0.51	4.62
ILMN_1793990	ID2	inhibitor of DNA binding 2, dominant negative helix-loop-helix protein (ID2), mRNA.	NM_002166.4	9.12	8.36	-0.76	4.62
ILMN_1810191	PLA2G4C	phospholipase A2, group IVC (cytosolic, calcium-independent) (PLA2G4C), mRNA.	NM_003706.1	7.37	6.73	-0.64	4.62
ILMN_1691508	PLAUR	plasminogen activator, urokinase receptor (PLAUR), transcript variant 2, mRNA.	NM_001005376.1	6.8	7.66	0.87	4.62
ILMN_1700733	KIAA1370	KIAA1370 (KIAA1370), mRNA.	NM_019600.2	9.72	8.9	-0.81	4.61
ILMN_1798181	IRF7	interferon regulatory factor 7 (IRF7), transcript variant b, mRNA.	NM_004029.2	10.19	9.54	-0.65	4.6
ILMN_1668012	SLC25A13	solute carrier family 25, member 13 (citrin) (SLC25A13), mRNA.	NM_014251.1	8.45	9.11	0.66	4.6
ILMN_1757845	SPIRE1	spire homolog 1 (Drosophila) (SPIRE1), mRNA.	NM_020148.2	8.96	9.62	0.66	4.6
ILMN_2359287	ITGA6	integrin, alpha 6 (ITGA6), transcript variant 2, mRNA.	NM_000210.2	11.02	11.65	0.63	4.58
ILMN_1714600	NAV3	neuron navigator 3 (NAV3), mRNA.	NM_014903.4	6.12	6.93	0.82	4.57
ILMN_1702637	BEX1	brain expressed, X-linked 1 (BEX1), mRNA.	NM_018476.3	8.13	7.36	-0.77	4.56
ILMN_1774604	PNKD	paroxysmal nonkinesiogenic dyskinesia (PNKD), transcript variant 2, mRNA.	NM_022572.2	6.62	6.07	-0.54	4.56
ILMN_1654060	MKNK2	MAP kinase interacting serine/threonine kinase 2 (MKNK2), transcript variant 2, mRNA.	NM_199054.2	8.64	8.11	-0.52	4.56
ILMN_1802458	AGTRAP	angiotensin II receptor-associated protein (AGTRAP), transcript variant 4, mRNA.	NM_001040196.1	7.29	8.13	0.84	4.55
ILMN_1706612	WFDC2	WAP four-disulfide core domain 2 (WFDC2), transcript variant 2, mRNA.	NM_080736.1	6.48	5.79	-0.69	4.54
ILMN_2194649	TADA1L	transcriptional adaptor 1 (HFI1 homolog, yeast)-like (TADA1L), mRNA.	NM_053053.2	8.78	8.07	-0.71	4.54
ILMN_1651296	LOC143666	PREDICTED: hypothetical protein LOC143666 (LOC143666), mRNA.	XM_001127524.1	8.35	7.72	-0.64	4.52
ILMN_1701711	BRD8	bromodomain containing 8 (BRD8), transcript variant 3, mRNA.	NM_183359.1	9.44	8.81	-0.64	4.51
ILMN_2175112	KCNS3	potassium voltage-gated channel, delayed-rectifier, subfamily S, member 3 (KCNS3), mRNA.	NM_002252.3	7.63	7.07	-0.56	4.5
ILMN_1731838	COX6BP1	cytochrome c oxidase subunit VIb pseudogene 1 (HCOX52) (COX6BP1) on chromosome 7.	NR_002210.1	6.72	7.29	0.57	4.48
ILMN_1660864	RHBDL1	rhomboid, veinlet-like 1 (Drosophila) (RHBDL1), mRNA.	NM_003961.1	7.51	6.76	-0.75	4.47
ILMN_1726448	MMP1	matrix metallopeptidase 1 (interstitial collagenase) (MMP1), mRNA.	NM_002421.2	8.16	9	0.84	4.47
ILMN_1805449	TAPBPL	TAP binding protein-like (TAPBPL), mRNA.	NM_018009.3	7.62	7.02	-0.6	4.46
ILMN_1786125	CCNA2	cyclin A2 (CCNA2), mRNA.	NM_001237.2	8.54	7.87	-0.67	4.46
ILMN_1659895	MSN	moesin (MSN), mRNA.	NM_002444.2	11.25	11.87	0.62	4.46
ILMN_1810782	SH3KBP1	SH3-domain kinase binding protein 1 (SH3KBP1), transcript variant 1, mRNA.	NM_031892.1	7.32	7.91	0.59	4.46
ILMN_1696419	STOM	stomatin (STOM), transcript variant 1, mRNA.	NM_004099.4	7.16	7.86	0.7	4.45
ILMN_1670130	ARID3A	AT rich interactive domain 3A (BRIGHT-like) (ARID3A), mRNA.	NM_005224.2	7.91	8.43	0.52	4.44
ILMN_1754114	FLJ20021	PREDICTED: hypothetical LOC90024 (FLJ20021), mRNA.	XM_028217.4	9.09	9.61	0.52	4.43
ILMN_1693740	LOC647834	PREDICTED: hypothetical protein LOC647834 (LOC647834), mRNA.	XM_943048.1	8.51	9.08	0.57	4.43
ILMN_1685574	TSC22D2	TSC22 domain family, member 2 (TSC22D2), mRNA.	NM_014779.2	8.81	9.54	0.73	4.43
ILMN_1669032	PPIC	peptidylprolyl isomerase C (cyclophilin C) (PPIC), mRNA.	NM_000943.4	9.51	10.06	0.55	4.43
ILMN_1796508	TOP1MT	PREDICTED: topoisomerase (DNA) I, mitochondrial (TOP1MT), mRNA.	XM_001130368.1	8.41	7.81	-0.6	4.41
ILMN_1708131	BHLHB9	basic helix-loop-helix domain containing, class B, 9 (BHLHB9), mRNA.	NM_030639.1	7.11	6.46	-0.64	4.41
ILMN_2368188	TRPV6	transient receptor potential cation channel, subfamily V, member 6 (TRPV6), mRNA.	NM_018646.2	6.57	5.95	-0.62	4.39
ILMN_1792088	C1orf101	chromosome 1 open reading frame 101 (C1orf101), mRNA.	NM_173807.3	6.45	7.3	0.85	4.38
ILMN_1718863	KCNK1	potassium channel, subfamily K, member 1 (KCNK1), mRNA.	NM_002245.2	10.84	10.2	-0.65	4.35
ILMN_1897333		BX098521 Soares fetal liver spleen 1NFLS cDNA clone IMAGp998L05118, mRNA sequence		6.69	7.4	0.71	4.35
ILMN_1669928	ARHGEF16	Rho guanine exchange factor (GEF) 16 (ARHGEF16), mRNA.	NM_014448.2	7.95	7.23	-0.72	4.34
ILMN_1665832	ID1	inhibitor of DNA binding 1, dominant negative helix-loop-helix protein (ID1), transcript variant 2, mRNA.	NM_181353.1	7.98	7.15	-0.83	4.33
ILMN_1881909		AGENCOURT_10229596 NIH_MGC_141 cDNA clone IMAGE:6563923 5, mRNA sequence		10.07	11.16	1.09	4.31
ILMN_1801156	RLF	rearranged L-myc fusion (RLF), mRNA.	NM_012421.2	7.02	6.3	-0.73	4.3
ILMN_1882590		cDNA FLJ37595 fis, clone BRCOC2007864		9.6	10.2	0.6	4.3
ILMN_1687583	CAV1	caveolin 1, caveolae protein, 22kDa (CAV1), mRNA.	NM_001753.3	11.09	11.73	0.64	4.3
ILMN_2115633	CD320	CD320 molecule (CD320), mRNA.	NM_016579.2	7.07	6.54	-0.53	4.29
ILMN_1728230	ZNF30	zinc finger protein 30 (ZNF30), transcript variant 2, mRNA.	NM_001099437.1	7.31	6.66	-0.65	4.29
ILMN_1766346	ZNF512B	zinc finger protein 512B (ZNF512B), mRNA.	NM_020713.1	8.75	8.15	-0.59	4.29
ILMN_2374352	DBNDD1	dysbindin (dystrobrevin binding protein 1) domain containing 1 (DBNDD1), transcript variant 1, mRNA.	NM_001042610.1	9.94	9.26	-0.68	4.29
ILMN_1665964	GAB2	GRB2-associated binding protein 2 (GAB2), transcript variant 1, mRNA.	NM_080491.1	7.48	6.81	-0.67	4.28
ILMN_1781942	HMMR	hyaluronan-mediated motility receptor (RHAMM) (HMMR), transcript variant 2, mRNA.	NM_012485.1	8.52	7.8	-0.72	4.28
ILMN_2051373	NEK2	NIMA (never in mitosis gene a)-related kinase 2 (NEK2), mRNA.	NM_002497.2	9.69	9.08	-0.62	4.28
ILMN_2358457	ATF4	activating transcription factor 4 (tax-responsive enhancer element B67) (ATF4), transcript variant 2, mRNA.	NM_182810.1	9.37	10.21	0.85	4.28
ILMN_1699737	TRAP1	TNF receptor-associated protein 1 (TRAP1), mRNA.	NM_016292.1	9.46	8.96	-0.51	4.26
ILMN_1654812	UNC93B1	unc-93 homolog B1 (C. elegans) (UNC93B1), mRNA.	NM_030930.2	8.2	7.45	-0.75	4.23
ILMN_1742332	KCTD12	potassium channel tetramerisation domain containing 12 (KCTD12), mRNA.	NM_138444.3	10.52	9.79	-0.73	4.23
ILMN_1660440	FAM108B1	family with sequence similarity 108, member B1 (FAM108B1), transcript variant 1, mRNA.	NM_016014.2	8.74	8.17	-0.57	4.23
ILMN_1660204	IGSF9B	immunoglobulin superfamily, member 9B (IGSF9B), mRNA.	NM_014987.1	7.12	7.8	0.68	4.23
ILMN_2364131	C20orf121	chromosome 20 open reading frame 121 (C20orf121), transcript variant 1, mRNA.	NM_024331.3	9.89	10.43	0.55	4.23
ILMN_1702633	RETSAT	retinol saturase (all-trans-retinol 13,14-reductase) (RETSAT), mRNA.	NM_017750.2	8.56	7.77	-0.78	4.22
ILMN_1729112	CHPT1	choline phosphotransferase 1 (CHPT1), mRNA.	NM_020244.2	8.18	7.66	-0.52	4.21
ILMN_1695271	RPP25	ribonuclease P/MRP 25kDa subunit (RPP25), mRNA.	NM_017793.2	6.41	5.8	-0.61	4.21
ILMN_1702231	C1orf54	chromosome 1 open reading frame 54 (C1orf54), mRNA.	NM_024579.2	7.5	6.9	-0.6	4.2
ILMN_2323774	RPAIN	RPA interacting protein (RPAIN), transcript variant 2, mRNA.	NM_032308.1	12.25	11.74	-0.51	4.2
ILMN_1661372	JUB	jub, ajuba homolog (Xenopus laevis) (JUB), transcript variant 1, mRNA.	NM_032876.4	7.28	8.03	0.75	4.2
ILMN_1782084	LOC200810	similar to beta-1,4-mannosyltransferase; beta-1,4 mannosyltransferase (LOC200810), mRNA.	NM_001015050.1	9.21	8.6	-0.61	4.19
ILMN_1669113	ATF5	activating transcription factor 5 (ATF5), mRNA.	NM_012068.3	9.29	8.72	-0.57	4.19
ILMN_1757129	TMEM88	transmembrane protein 88 (TMEM88), mRNA.	NM_203411.1	6.01	6.82	0.82	4.18
ILMN_1665884	REP15	Rab15 effector protein (REP15), mRNA.	NM_001029874.1	7.09	7.72	0.63	4.18
ILMN_1711899	ANXA2	annexin A2 (ANXA2), transcript variant 2, mRNA.	NM_001002857.1	13.14	14.05	0.91	4.18
ILMN_2267488	ITGA6	integrin, alpha 6 (ITGA6), transcript variant 2, mRNA.	NM_000210.2	10	10.88	0.88	4.17
ILMN_1658798	MEGF9	multiple EGF-like-domains 9 (MEGF9), mRNA.	NM_001080497.1	6.72	7.39	0.66	4.17
ILMN_1771870	FAM98C	family with sequence similarity 98, member C (FAM98C), mRNA.	NM_174905.2	8.26	7.66	-0.61	4.16
ILMN_1651498	GADD45G	growth arrest and DNA-damage-inducible, gamma (GADD45G), mRNA.	NM_006705.2	8.29	8.94	0.65	4.16
ILMN_1795778	P4HA2	procollagen-proline, 2-oxoglutarate 4-dioxygenase (proline 4-hydroxylase), alpha polypeptide II (P4HA2), transcript variant 2, mRNA.	NM_001017973.1	10.66	11.26	0.6	4.16
ILMN_1738938	TIMM8B	translocase of inner mitochondrial membrane 8 homolog B (yeast) (TIMM8B), nuclear gene encoding mitochondrial protein, mRNA.	NM_012459.1	7.77	8.56	0.79	4.16
ILMN_2211800	HMG1L1	high-mobility group (nonhistone chromosomal) protein 1-like 1 (HMG1L1), mRNA.	NM_001008735.1	9.88	10.59	0.71	4.16
ILMN_1659843	DNAJC3	DnaJ (Hsp40) homolog, subfamily C, member 3 (DNAJC3), mRNA.	NM_006260.2	6.35	6.97	0.62	4.13
ILMN_2070896	BMPR2	bone morphogenetic protein receptor, type II (serine/threonine kinase) (BMPR2), mRNA.	NM_001204.5	8.62	9.39	0.77	4.13
ILMN_1806463	CTAGE6	CTAGE family, member 6 (CTAGE6), mRNA.	NM_178561.4	7.22	7.88	0.65	4.13
ILMN_1708105	EZH2	enhancer of zeste homolog 2 (Drosophila) (EZH2), transcript variant 2, mRNA.	NM_152998.1	7.32	6.71	-0.6	4.12
ILMN_1779373	HIST1H2BF	histone cluster 1, H2bf (HIST1H2BF), mRNA.	NM_003522.3	6.62	6.06	-0.56	4.12
ILMN_1664398	LOC651621	PREDICTED: similar to hydroxysteroid (17-beta) dehydrogenase 7 (LOC651621), mRNA.	XM_940809.1	8.18	8.78	0.6	4.12
ILMN_1731113	ZBTB43	zinc finger and BTB domain containing 43 (ZBTB43), mRNA.	NM_014007.2	10.72	10.14	-0.59	4.11
ILMN_1669052	LRRC8E	leucine rich repeat containing 8 family, member E (LRRC8E), mRNA.	NM_025061.3	8.17	8.71	0.53	4.11
ILMN_1810055	ITFG3	integrin alpha FG-GAP repeat containing 3 (ITFG3), mRNA.	NM_032039.1	9.63	8.99	-0.65	4.1
ILMN_1724211	GPRC5C	G protein-coupled receptor, family C, group 5, member C (GPRC5C), transcript variant 1, mRNA.	NM_022036.2	8.22	7.58	-0.63	4.09
ILMN_1708486	CNN2	calponin 2 (CNN2), transcript variant 1, mRNA.	NM_004368.2	6.83	7.52	0.69	4.09
ILMN_1718063	LIPA	lipase A, lysosomal acid, cholesterol esterase (Wolman disease) (LIPA), mRNA.	NM_000235.2	11.9	11.34	-0.56	4.07
ILMN_1815733	EIF5	eukaryotic translation initiation factor 5 (EIF5), transcript variant 1, mRNA.	NM_001969.3	11.73	11.15	-0.58	4.07
ILMN_1781386	WIPI1	WD repeat domain, phosphoinositide interacting 1 (WIPI1), mRNA.	NM_017983.4	7.24	7.87	0.62	4.07
ILMN_1811593	NPAL1	NIPA-like domain containing 1 (NPAL1), mRNA.	NM_207330.1	8.89	9.64	0.75	4.07
ILMN_1666156	MORF4L2	mortality factor 4 like 2 (MORF4L2), mRNA.	NM_012286.1	11.78	12.49	0.71	4.06
ILMN_1788961	PPP2R2A	protein phosphatase 2 (formerly 2A), regulatory subunit B, alpha isoform (PPP2R2A), mRNA.	NM_002717.2	9.85	10.49	0.64	4.06
ILMN_1784661	TMEM2	transmembrane protein 2 (TMEM2), mRNA.	NM_013390.1	9.42	10.02	0.6	4.06
ILMN_2157075	LRCH4	leucine-rich repeats and calponin homology (CH) domain containing 4 (LRCH4), mRNA.	NM_002319.3	8.53	8	-0.53	4.05
ILMN_2240003	ABL2	v-abl Abelson murine leukemia viral oncogene homolog 2 (arg, Abelson-related gene) (ABL2), transcript variant b, mRNA.	NM_007314.1	6.2	6.9	0.7	4.04
ILMN_2186983	ANXA8L2	annexin A8-like 2 (ANXA8L2), mRNA.	NM_001630.2	12.95	13.54	0.59	4.04
ILMN_1757072	LOC642489	PREDICTED: similar to FK506-binding protein 1A (LOC642489), mRNA.	XM_925989.1	11.18	11.72	0.55	4.03
ILMN_1697220	NT5E	5'-nucleotidase, ecto (CD73) (NT5E), mRNA.	NM_002526.1	6.68	7.49	0.82	4.03
ILMN_1777591	C10orf65	chromosome 10 open reading frame 65 (C10orf65), mRNA.	NM_138413.2	8.31	7.51	-0.8	4.02
ILMN_2138801	TP73L	tumor protein p73-like (TP73L), mRNA.	NM_003722.3	11.22	12.19	0.97	4.02
ILMN_1804530	LOC653888	PREDICTED: similar to Actin-related protein 2/3 complex subunit 1B (ARP2/3 complex 41 kDa subunit) (p41-ARC) (LOC653888), mRNA.	XM_936251.2	10.15	10.7	0.55	4.01
ILMN_1736015	PHF17	PHD finger protein 17 (PHF17), transcript variant S, mRNA.	NM_024900.3	7.29	6.74	-0.55	4
ILMN_1807003	ANXA11	annexin A11 (ANXA11), transcript variant c, mRNA.	NM_145869.1	8.01	7.21	-0.8	3.99
ILMN_1672094	DLX1	distal-less homeobox 1 (DLX1), transcript variant 1, mRNA.	NM_178120.4	8.07	8.7	0.63	3.99
ILMN_1743711	LOC650215	PREDICTED: similar to Exportin-T (tRNA exportin) (Exportin(tRNA)) (LOC650215), mRNA.	XR_018889.1	9.45	10.32	0.87	3.99
ILMN_1773066	CDKN2AIP	CDKN2A interacting protein (CDKN2AIP), mRNA.	NM_017632.2	8.12	7.56	-0.56	3.96
ILMN_1687824	SEPHS2	selenophosphate synthetase 2 (SEPHS2), mRNA.	NM_012248.2	8.28	8.89	0.61	3.96
ILMN_2384591	HN1	hematological and neurological expressed 1 (HN1), transcript variant 1, mRNA.	NM_016185.2	9.16	9.91	0.76	3.95
ILMN_1704369	LIMA1	LIM domain and actin binding 1 (LIMA1), mRNA.	NM_016357.3	9.93	10.68	0.75	3.95
ILMN_1710544	PCDH7	protocadherin 7 (PCDH7), transcript variant a, mRNA.	NM_002589.2	7.82	7.15	-0.66	3.94
ILMN_1865441		cDNA FLJ43972 fis, clone TESTI4017961		6.36	7.15	0.79	3.94
ILMN_1769299	MTMR11	myotubularin related protein 11 (MTMR11), mRNA.	NM_181873.2	9.93	10.45	0.51	3.91
ILMN_1778625	CD44	CD44 molecule (Indian blood group) (CD44), transcript variant 1, mRNA.	NM_000610.3	8.83	9.75	0.92	3.9
ILMN_1751615	COQ10B	coenzyme Q10 homolog B (S. cerevisiae) (COQ10B), mRNA.	NM_025147.3	10.13	10.64	0.5	3.9
ILMN_2064860	LOC653499	similar to Galectin-7 (Gal-7) (HKL-14) (PI7) (p53-induced protein 1) (LOC653499), mRNA.	NM_001042507.1	12.33	12.87	0.54	3.9
ILMN_1715401	MT1G	metallothionein 1G (MT1G), mRNA.	NM_005950.1	8.65	7.99	-0.66	3.88
ILMN_1712705	RAB40C	RAB40C, member RAS oncogene family (RAB40C), mRNA.	NM_021168.2	12.8	12.22	-0.59	3.88
ILMN_1736093	SNX33	sorting nexin 33 (SNX33), mRNA.	NM_153271.1	8.57	9.24	0.67	3.88
ILMN_1741869	WDR47	WD repeat domain 47 (WDR47), mRNA.	NM_014969.4	9.46	8.76	-0.7	3.87
ILMN_1669557	AIM1L	absent in melanoma 1-like (AIM1L), mRNA.	NM_001039775.1	7.38	6.55	-0.83	3.87
ILMN_1876219		UI-CF-EN1-ael-e-06-18-UI.r18 UI-CF-EN1 cDNA clone UI-CF-EN1-ael-e-06-18-UI 5, mRNA sequence		6.68	7.36	0.68	3.87
ILMN_1861057		hypothetical protein LOC338620, mRNA (cDNA clone IMAGE:6023208), partial cds		6.63	7.24	0.61	3.87
ILMN_1713846	PPM1H	protein phosphatase 1H (PP2C domain containing) (PPM1H), mRNA.	NM_020700.1	7	6.3	-0.7	3.85
ILMN_1803838	CNFN	cornifelin (CNFN), mRNA.	NM_032488.2	8.3	7.75	-0.55	3.85
ILMN_1741032	HERC3	hect domain and RLD 3 (HERC3), mRNA.	NM_014606.1	6.27	7.01	0.74	3.85
ILMN_1663080	LFNG	LFNG O-fucosylpeptide 3-beta-N-acetylglucosaminyltransferase (LFNG), transcript variant 1, mRNA.	NM_001040167.1	11.68	12.2	0.52	3.85
ILMN_1759097	MLLT11	myeloid/lymphoid or mixed-lineage leukemia (trithorax homolog, Drosophila); translocated to, 11 (MLLT11), mRNA.	NM_006818.3	8.77	9.37	0.6	3.85
ILMN_1803510	LOC650803	PREDICTED: hypothetical protein LOC650803 (LOC650803), mRNA.	XM_939893.1	7.41	8.09	0.67	3.84
ILMN_1751887	PREP	prolyl endopeptidase (PREP), mRNA.	NM_002726.3	9.08	9.67	0.59	3.84
ILMN_1737360	TSPYL3	PREDICTED: TSPY-like 3 (pseudogene) (TSPYL3), misc RNA.	XR_001421.1	6.69	6.16	-0.53	3.83
ILMN_1657199	NFASC	neurofascin homolog (chicken) (NFASC), transcript variant 3, mRNA.	NM_001005389.1	7.91	8.43	0.52	3.83
ILMN_1810836	PDE5A	phosphodiesterase 5A, cGMP-specific (PDE5A), transcript variant 1, mRNA.	NM_001083.3	8.72	8.14	-0.58	3.81
ILMN_2195821	C5orf41	chromosome 5 open reading frame 41 (C5orf41), mRNA.	NM_153607.1	8.2	7.49	-0.7	3.78
ILMN_2413650	STIL	SCL/TAL1 interrupting locus (STIL), transcript variant 2, mRNA.	NM_003035.2	10.34	9.74	-0.6	3.77
ILMN_1684440	PXN	paxillin (PXN), mRNA.	NM_002859.1	7.52	8.23	0.71	3.77
ILMN_1785324	MTHFD1	methylenetetrahydrofolate dehydrogenase (NADP+ dependent) 1, methenyltetrahydrofolate cyclohydrolase, formyltetrahydrofolate synthetase (MTHFD1), mRNA.	NM_005956.2	8.01	7.43	-0.58	3.76
ILMN_1849494		clone 24841 mRNA sequence		6.01	6.61	0.6	3.76
ILMN_1797031	HSPBAP1	HSPB (heat shock 27kDa) associated protein 1 (HSPBAP1), mRNA.	NM_024610.4	8.89	9.4	0.51	3.76
ILMN_2124187	TSC22D2	TSC22 domain family, member 2 (TSC22D2), mRNA.	NM_014779.2	9.66	10.24	0.57	3.75
ILMN_1754103	CLDN11	claudin 11 (oligodendrocyte transmembrane protein) (CLDN11), mRNA.	NM_005602.4	6.29	6.89	0.61	3.74
ILMN_1674650	C9orf95	chromosome 9 open reading frame 95 (C9orf95), mRNA.	NM_017881.1	10.75	9.97	-0.78	3.73
ILMN_1798926	SOCS2	suppressor of cytokine signaling 2 (SOCS2), mRNA.	NM_003877.3	8.55	8	-0.55	3.73
ILMN_1776925	PRSS22	protease, serine, 22 (PRSS22), mRNA.	NM_022119.3	6.48	5.89	-0.59	3.72
ILMN_1801767	ABHD3	abhydrolase domain containing 3 (ABHD3), mRNA.	NM_138340.3	10.19	10.71	0.52	3.72
ILMN_1661628	LOC653110	PREDICTED: similar to annexin A8, transcript variant 1 (LOC653110), mRNA.	XM_926584.1	12.21	12.87	0.65	3.71
ILMN_1711608	SSBP2	single-stranded DNA binding protein 2 (SSBP2), mRNA.	NM_012446.2	6.95	6.25	-0.7	3.68
ILMN_1660806	CSRP2	cysteine and glycine-rich protein 2 (CSRP2), mRNA.	NM_001321.1	8.8	9.45	0.65	3.68
ILMN_1730523	C16orf14	chromosome 16 open reading frame 14 (C16orf14), mRNA.	NM_138418.2	7.79	7.17	-0.62	3.67
ILMN_2074258	BARD1	BRCA1 associated RING domain 1 (BARD1), mRNA.	NM_000465.1	9.37	8.79	-0.58	3.67
ILMN_1717799	PRKCE	protein kinase C, epsilon (PRKCE), mRNA.	NM_005400.2	6.51	5.89	-0.62	3.66
ILMN_1881526		od80c09.s1 NCI_CGAP_Ov2 cDNA clone IMAGE:1374256, mRNA sequence		8.93	8.31	-0.62	3.66
ILMN_2262203	PMS2CL	PMS2 C-terminal like pseudogene (PMS2CL) on chromosome 7.	NR_002217.1	8.11	7.33	-0.78	3.65
ILMN_2346479	HOMER2	homer homolog 2 (Drosophila) (HOMER2), transcript variant 4, mRNA.	NM_199332.2	6.75	7.4	0.65	3.65
ILMN_1762106	MMP2	matrix metallopeptidase 2 (gelatinase A, 72kDa gelatinase, 72kDa type IV collagenase) (MMP2), mRNA.	NM_004530.2	6.71	7.29	0.58	3.65
ILMN_1698685	MATN2	matrilin 2 (MATN2), transcript variant 1, mRNA.	NM_002380.3	9	8.42	-0.58	3.63
ILMN_1706969	C6orf65	chromosome 6 open reading frame 65 (C6orf65), mRNA.	NM_152731.2	6.55	7.13	0.59	3.62
ILMN_1668351	TAF6	TAF6 RNA polymerase II, TATA box binding protein (TBP)-associated factor, 80kDa (TAF6), transcript variant 2, mRNA.	NM_139315.1	8.23	7.37	-0.85	3.61
ILMN_1810533	SLC6A15	solute carrier family 6, member 15 (SLC6A15), transcript variant 1, mRNA.	NM_182767.3	6.33	6.96	0.63	3.61
ILMN_1656184	PI4KAP1	phosphatidylinositol 4-kinase, catalytic, alpha pseudogene 1 (PI4KAP1) on chromosome 22.	NR_003563.1	8.8	8.21	-0.59	3.6
ILMN_2409220	HMMR	hyaluronan-mediated motility receptor (RHAMM) (HMMR), transcript variant 1, mRNA.	NM_012484.1	9.32	8.69	-0.63	3.58
ILMN_1813568	TRPV1	transient receptor potential cation channel, subfamily V, member 1 (TRPV1), transcript variant 4, mRNA.	NM_080705.3	8.53	9.18	0.65	3.58
ILMN_1690939	ECGF1	endothelial cell growth factor 1 (platelet-derived) (ECGF1), mRNA.	NM_001953.2	6.34	6.96	0.62	3.58
ILMN_1668910	CIDEB	cell death-inducing DFFA-like effector b (CIDEB), mRNA.	NM_014430.2	7.58	6.96	-0.62	3.57
ILMN_2225974	GCLM	glutamate-cysteine ligase, modifier subunit (GCLM), mRNA.	NM_002061.2	8.34	9	0.66	3.56
ILMN_1695110	BCAT2	branched chain aminotransferase 2, mitochondrial (BCAT2), nuclear gene encoding mitochondrial protein, mRNA.	NM_001190.2	8.98	8.41	-0.57	3.55
ILMN_1671905	C10orf78	chromosome 10 open reading frame 78 (C10orf78), transcript variant 2, mRNA.	NM_145247.4	9.73	9.04	-0.69	3.55
ILMN_1661599	DDIT4	DNA-damage-inducible transcript 4 (DDIT4), mRNA.	NM_019058.2	12.93	12.41	-0.51	3.55
ILMN_1777895	LRRC37B	leucine rich repeat containing 37B (LRRC37B), mRNA.	NM_052888.2	9.9	9.36	-0.54	3.55
ILMN_1809783	LOC643161	PREDICTED: hypothetical LOC643161 (LOC643161), mRNA.	XM_926530.2	6.01	6.55	0.54	3.55
ILMN_1796336	MAP1S	microtubule-associated protein 1S (MAP1S), mRNA.	NM_018174.4	7.91	7.33	-0.58	3.54
ILMN_2075757	LRIG3	leucine-rich repeats and immunoglobulin-like domains 3 (LRIG3), mRNA.	NM_153377.3	7.84	8.56	0.72	3.53
ILMN_1716370	TNS4	tensin 4 (TNS4), mRNA.	NM_032865.4	6.42	7.1	0.68	3.53
ILMN_1707553	FAM59A	family with sequence similarity 59, member A (FAM59A), mRNA.	NM_022751.1	8.24	7.66	-0.58	3.52
ILMN_1652521	MTMR9	myotubularin related protein 9 (MTMR9), mRNA.	NM_015458.3	9.02	9.53	0.51	3.52
ILMN_1775822	PDGFB	platelet-derived growth factor beta polypeptide (simian sarcoma viral (v-sis) oncogene homolog) (PDGFB), transcript variant 1, mRNA.	NM_002608.1	6	6.59	0.59	3.52
ILMN_1760849	NETO2	neuropilin (NRP) and tolloid (TLL)-like 2 (NETO2), mRNA.	NM_018092.3	9.38	8.86	-0.52	3.5
ILMN_1742981	TUBA1A	tubulin, alpha 1a (TUBA1A), mRNA.	NM_006009.2	10.61	11.32	0.71	3.5
ILMN_1742167	TUBA1C	tubulin, alpha 1c (TUBA1C), mRNA.	NM_032704.2	13.02	13.56	0.54	3.5
ILMN_1656938	LOC731486	PREDICTED: hypothetical protein LOC731486 (LOC731486), mRNA.	XM_001133149.1	8.76	8.22	-0.54	3.49
ILMN_1662358	MX1	myxovirus (influenza virus) resistance 1, interferon-inducible protein p78 (mouse) (MX1), mRNA.	NM_002462.2	8.3	7.2	-1.1	3.49
ILMN_1718395	LCE3D	late cornified envelope 3D (LCE3D), mRNA.	NM_032563.1	5.63	6.26	0.63	3.49
ILMN_1788783	TRAM2	translocation associated membrane protein 2 (TRAM2), mRNA.	NM_012288.3	7.54	8.19	0.65	3.49
ILMN_2376050	FXYD3	FXYD domain containing ion transport regulator 3 (FXYD3), transcript variant 1, mRNA.	NM_005971.2	10.66	9.93	-0.73	3.48
ILMN_2223903	PPIC	peptidylprolyl isomerase C (cyclophilin C) (PPIC), mRNA.	NM_000943.4	9.35	9.92	0.57	3.48
ILMN_1664855	PPP1R14C	protein phosphatase 1, regulatory (inhibitor) subunit 14C (PPP1R14C), mRNA.	NM_030949.2	9.41	9.96	0.55	3.47
ILMN_1677962	GPHN	gephyrin (GPHN), transcript variant 2, mRNA.	NM_001024218.1	8.74	8.2	-0.54	3.45
ILMN_1840920		mRNA; cDNA DKFZp313O229 (from clone DKFZp313O229)		6.76	6.16	-0.6	3.45
ILMN_1903914		cDNA FLJ26188 fis, clone ADG04821		7.97	8.63	0.65	3.45
ILMN_1735038	39875	membrane-associated ring finger (C3HC4) 3 (MARCH3), mRNA.	NM_178450.2	6.76	7.32	0.56	3.45
ILMN_1753830	ETV4	ets variant gene 4 (E1A enhancer binding protein, E1AF) (ETV4), mRNA.	NM_001986.1	6.44	6.99	0.55	3.45
ILMN_1730611	RTN4	reticulon 4 (RTN4), transcript variant 3, mRNA.	NM_007008.2	11.65	12.35	0.7	3.44
ILMN_1801766	CCDC109B	coiled-coil domain containing 109B (CCDC109B), mRNA.	NM_017918.3	10.12	10.65	0.53	3.44
ILMN_1760040	PPIL3	peptidylprolyl isomerase (cyclophilin)-like 3 (PPIL3), transcript variant PPIL3c, mRNA.	NM_131916.1	6.89	6.32	-0.58	3.43
ILMN_1701643	GDPD5	glycerophosphodiester phosphodiesterase domain containing 5 (GDPD5), mRNA.	NM_030792.5	6.82	6.27	-0.54	3.43
ILMN_1770653	MAL2	mal, T-cell differentiation protein 2 (MAL2), mRNA.	NM_052886.2	10.37	9.62	-0.75	3.43
ILMN_1777644	PIB5PA	phosphatidylinositol (4,5) bisphosphate 5-phosphatase, A (PIB5PA), transcript variant 1, mRNA.	NM_014422.2	7.5	6.99	-0.51	3.43
ILMN_1720048	CCL2	chemokine (C-C motif) ligand 2 (CCL2), mRNA.	NM_002982.3	7.54	6.87	-0.67	3.42
ILMN_1709124	TMEM16H	transmembrane protein 16H (TMEM16H), mRNA.	NM_020959.1	7.25	6.68	-0.57	3.4
ILMN_1810977	CDV3	CDV3 homolog (mouse) (CDV3), mRNA. XM_945284 XM_945286 XM_945287	NM_017548.3	10.63	11.19	0.56	3.4
ILMN_1685480	TARS	threonyl-tRNA synthetase (TARS), mRNA.	NM_152295.3	10.75	11.3	0.55	3.4
ILMN_1745005	C7orf24	chromosome 7 open reading frame 24 (C7orf24), mRNA.	NM_024051.2	9.5	8.92	-0.58	3.39
ILMN_1725366	SLC27A5	solute carrier family 27 (fatty acid transporter), member 5 (SLC27A5), mRNA.	NM_012254.1	7.14	6.54	-0.6	3.39
ILMN_1735415	NUDT16L1	nudix (nucleoside diphosphate linked moiety X)-type motif 16-like 1 (NUDT16L1), mRNA.	NM_032349.2	9.21	8.7	-0.51	3.39
ILMN_1673778	LOC649270	PREDICTED: similar to aminopeptidase puromycin sensitive, transcript variant 2 (LOC649270), mRNA.	XM_945378.1	8.06	7.5	-0.56	3.38
ILMN_1707748	PIM3	PREDICTED: pim-3 oncogene (PIM3), mRNA.	XM_938171.2	7.46	6.82	-0.64	3.37
ILMN_1670705	STON2	stonin 2 (STON2), mRNA.	NM_033104.2	5.86	6.44	0.58	3.37
ILMN_2226223	GJB6	gap junction protein, beta 6 (GJB6), mRNA.	NM_006783.2	5.76	6.33	0.57	3.37
ILMN_1727200	SLCO4A1	solute carrier organic anion transporter family, member 4A1 (SLCO4A1), mRNA.	NM_016354.3	6.75	6.16	-0.59	3.36
ILMN_1730575	GCLC	glutamate-cysteine ligase, catalytic subunit (GCLC), mRNA.	NM_001498.2	9.25	8.71	-0.54	3.36
ILMN_1708611	RDX	radixin (RDX), mRNA.	NM_002906.3	8.84	9.61	0.77	3.36
ILMN_1720267	TARSL2	threonyl-tRNA synthetase-like 2 (TARSL2), mRNA.	NM_152334.2	6.65	7.26	0.61	3.36
ILMN_1770719	KIAA0664	KIAA0664 (KIAA0664), mRNA.	NM_015229.3	8.45	7.9	-0.55	3.35
ILMN_1692223	LCN2	lipocalin 2 (LCN2), mRNA.	NM_005564.3	10.44	9.93	-0.5	3.35
ILMN_1792072	FUT4	fucosyltransferase 4 (alpha (1,3) fucosyltransferase, myeloid-specific) (FUT4), mRNA.	NM_002033.2	6.3	6.88	0.57	3.35
ILMN_2340919	GRB10	growth factor receptor-bound protein 10 (GRB10), transcript variant 1, mRNA.	NM_005311.3	5.92	6.43	0.51	3.35
ILMN_2086095	ID2	inhibitor of DNA binding 2, dominant negative helix-loop-helix protein (ID2), mRNA.	NM_002166.4	9.7	8.97	-0.72	3.34
ILMN_1789638	MFSD2	major facilitator superfamily domain containing 2 (MFSD2), mRNA.	NM_032793.2	5.81	6.33	0.53	3.34
ILMN_2168952	DENR	density-regulated protein (DENR), mRNA.	NM_003677.3	10.91	11.49	0.58	3.33
ILMN_2089329	SPRY2	sprouty homolog 2 (Drosophila) (SPRY2), mRNA.	NM_005842.2	8.11	8.72	0.62	3.32
ILMN_1666076	ARHGEF4	Rho guanine nucleotide exchange factor (GEF) 4 (ARHGEF4), transcript variant 1, mRNA.	NM_015320.2	8.83	8.22	-0.61	3.31
ILMN_1700541	FBLN1	fibulin 1 (FBLN1), transcript variant C, mRNA.	NM_001996.2	8.47	7.95	-0.53	3.31
ILMN_1761281	LOC441019	PREDICTED: hypothetical LOC441019 (LOC441019), mRNA.	XM_498969.2	7.7	7.13	-0.58	3.31
ILMN_1664706	LOC653604	PREDICTED: similar to H3 histone, family 2 isoform 2 (LOC653604), mRNA.	XM_497711.2	7.27	6.62	-0.66	3.31
ILMN_1815114	FLJ27365	FLJ27365 protein (FLJ27365), mRNA.	NM_207477.1	7.51	8.06	0.55	3.31
ILMN_1794501	HAS3	hyaluronan synthase 3 (HAS3), transcript variant 1, mRNA.	NM_005329.2	7.6	6.98	-0.62	3.3
ILMN_1751561	CAMK1D	calcium/calmodulin-dependent protein kinase ID (CAMK1D), transcript variant 2, mRNA.	NM_153498.2	6.56	7.09	0.52	3.3
ILMN_1692100	ZNF35	zinc finger protein 35 (ZNF35), mRNA.	NM_003420.3	6.8	7.3	0.5	3.3
ILMN_1676285	DHX9	DEAH (Asp-Glu-Ala-His) box polypeptide 9 (DHX9), mRNA.	NM_001357.3	7.17	6.58	-0.59	3.28
ILMN_1763882	LOC644634	PREDICTED: hypothetical LOC644634, transcript variant 1 (LOC644634), mRNA.	XM_001133559.1	7.22	7.79	0.56	3.28
ILMN_1686988	ST5	suppression of tumorigenicity 5 (ST5), transcript variant 3, mRNA.	NM_213618.1	7.55	8.11	0.56	3.28
ILMN_2151281	GABARAPL1	GABA(A) receptor-associated protein like 1 (GABARAPL1), mRNA.	NM_031412.2	9.92	10.54	0.62	3.26
ILMN_2392818	RTKN	rhotekin (RTKN), transcript variant 3, mRNA.	NM_001015056.1	6.77	7.41	0.64	3.25
ILMN_2346831	MGAT2	mannosyl (alpha-1,6-)-glycoprotein beta-1,2-N-acetylglucosaminyltransferase (MGAT2), transcript variant 2, mRNA.	NM_001015883.1	8.54	9.06	0.52	3.24
ILMN_1717706	PLK2	polo-like kinase 2 (Drosophila) (PLK2), mRNA.	NM_006622.2	7.31	8.02	0.71	3.24
ILMN_2325394	MSH5	mutS homolog 5 (E. coli) (MSH5), transcript variant 4, mRNA.	NM_172166.2	7.01	6.27	-0.75	3.23
ILMN_2068499	POU5F1P1	POU class 5 homeobox 1 pseudogene 1 (POU5F1P1) on chromosome 8.	NR_002304.1	6.79	6.22	-0.56	3.23
ILMN_2314007	TCF12	transcription factor 12 (HTF4, helix-loop-helix transcription factors 4) (TCF12), transcript variant 2, mRNA.	NM_207037.1	9.9	10.66	0.75	3.23
ILMN_1701477	CCDC101	coiled-coil domain containing 101 (CCDC101), mRNA.	NM_138414.1	6.78	6.23	-0.55	3.22
ILMN_1664993	GIYD2	GIY-YIG domain containing 2 (GIYD2), transcript variant 1, mRNA.	NM_024044.2	7.07	6.36	-0.72	3.22
ILMN_2202948	BUB1	BUB1 budding uninhibited by benzimidazoles 1 homolog (yeast) (BUB1), mRNA.	NM_004336.2	8.19	7.59	-0.6	3.2
ILMN_1657868	SIRT4	sirtuin (silent mating type information regulation 2 homolog) 4 (S. cerevisiae) (SIRT4), mRNA.	NM_012240.1	7.23	6.63	-0.61	3.19
ILMN_1879480		cDNA FLJ35319 fis, clone PROST2011577		8.11	7.5	-0.6	3.18
ILMN_2120631	TPRXL	tetra-peptide repeat homeobox-like (TPRXL) on chromosome 3.	NR_002223.1	7.04	6.44	-0.6	3.17
ILMN_1678671	KLHL24	kelch-like 24 (Drosophila) (KLHL24), mRNA.	NM_017644.3	10.71	10.12	-0.6	3.17
ILMN_1782688	THNSL1	threonine synthase-like 1 (S. cerevisiae) (THNSL1), mRNA.	NM_024838.4	7.34	6.7	-0.65	3.17
ILMN_1911503		ip26b05.y1 HR85 islet cDNA clone IMAGE:6218432 5, mRNA sequence		9.25	8.73	-0.52	3.17
ILMN_2124352	DCUN1D5	DCN1, defective in cullin neddylation 1, domain containing 5 (S. cerevisiae) (DCUN1D5), mRNA.	NM_032299.2	10.01	10.54	0.53	3.17
ILMN_1745112	FAM102A	family with sequence similarity 102, member A (FAM102A), transcript variant 1, mRNA.	NM_001035254.1	8	7.48	-0.52	3.16
ILMN_1698020	DLC1	deleted in liver cancer 1 (DLC1), transcript variant 3, mRNA.	NM_024767.2	8.84	9.45	0.61	3.16
ILMN_1708093	ARHGEF5	Rho guanine nucleotide exchange factor (GEF) 5 (ARHGEF5), mRNA.	NM_005435.3	8.27	8.8	0.53	3.15
ILMN_1669572	RNF126	ring finger protein 126 (RNF126), mRNA.	NM_194460.1	7.87	8.43	0.56	3.15
ILMN_1772036	STEAP4	STEAP family member 4 (STEAP4), mRNA.	NM_024636.2	6.37	5.82	-0.55	3.14
ILMN_1821052		602508665F1 NIH_MGC_79 cDNA clone IMAGE:4605617 5, mRNA sequence		6.55	7.12	0.57	3.13
ILMN_1799598	SIRT5	sirtuin (silent mating type information regulation 2 homolog) 5 (S. cerevisiae) (SIRT5), transcript variant 1, mRNA.	NM_012241.2	7.63	7.07	-0.57	3.11
ILMN_2308338	BMF	Bcl2 modifying factor (BMF), transcript variant 4, mRNA.	NM_001003943.1	7.63	8.26	0.63	3.1
ILMN_1708672	ACAT2	acetyl-Coenzyme A acetyltransferase 2 (ACAT2), mRNA.	NM_005891.2	11.23	11.75	0.52	3.09
ILMN_1912827		K-EST0216649 L17N670205n1 cDNA clone L17N670205n1-10-D09 5, mRNA sequence		6.82	7.37	0.55	3.09
ILMN_1776487	TADA1L	transcriptional adaptor 1 (HFI1 homolog, yeast)-like (TADA1L), mRNA.	NM_053053.2	8.37	7.83	-0.54	3.08
ILMN_2379560	CDC14B	CDC14 cell division cycle 14 homolog B (S. cerevisiae) (CDC14B), transcript variant 2, mRNA.	NM_033331.2	9.94	9.4	-0.54	3.07
ILMN_1758049	NFIA	nuclear factor I/A (NFIA), mRNA.	NM_005595.1	7.97	7.32	-0.64	3.07
ILMN_2391458	ACSL4	acyl-CoA synthetase long-chain family member 4 (ACSL4), transcript variant 2, mRNA.	NM_022977.1	6.13	6.77	0.64	3.07
ILMN_1690621	GPR98	G protein-coupled receptor 98 (GPR98), transcript variant 1, mRNA.	NM_032119.3	6.78	7.34	0.56	3.06
ILMN_1757910	HIP1R	PREDICTED: huntingtin interacting protein 1 related (HIP1R), mRNA.	XM_001132864.1	6.59	7.19	0.6	3.06
ILMN_1724437	GCAT	glycine C-acetyltransferase (2-amino-3-ketobutyrate coenzyme A ligase) (GCAT), nuclear gene encoding mitochondrial protein, mRNA.	NM_014291.2	7.83	7.26	-0.57	3.05
ILMN_1774708	ORMDL2	ORM1-like 2 (S. cerevisiae) (ORMDL2), mRNA.	NM_014182.4	7.42	8.08	0.66	3.05
ILMN_1677511	PTGS2	prostaglandin-endoperoxide synthase 2 (prostaglandin G/H synthase and cyclooxygenase) (PTGS2), mRNA.	NM_000963.1	5.98	6.49	0.51	3.05
ILMN_2287157	DST	dystonin (DST), transcript variant 1, mRNA.	NM_183380.1	7.75	8.37	0.62	3.04
ILMN_2117323	PIK3C2B	phosphoinositide-3-kinase, class 2, beta polypeptide (PIK3C2B), mRNA.	NM_002646.2	9.3	8.74	-0.56	3.03
ILMN_1769027	CDC42SE1	CDC42 small effector 1 (CDC42SE1), transcript variant 1, mRNA.	NM_001038707.1	7.12	7.79	0.66	3.03
ILMN_1722798	PLCD3	phospholipase C, delta 3 (PLCD3), mRNA.	NM_133373.3	8.19	7.52	-0.67	3.02
ILMN_1728009	TMEM171	transmembrane protein 171 (TMEM171), mRNA.	NM_173490.5	6.1	6.64	0.53	3.02
ILMN_1702237	FKBP1A	FK506 binding protein 1A, 12kDa (FKBP1A), transcript variant 12A, mRNA.	NM_054014.1	6.26	6.77	0.51	3.02
ILMN_1739241	CHAC1	ChaC, cation transport regulator homolog 1 (E. coli) (CHAC1), mRNA.	NM_024111.2	5.83	6.56	0.72	3.02
ILMN_1732717	FAM71E1	family with sequence similarity 71, member E1 (FAM71E1), mRNA.	NM_138411.1	8.13	7.59	-0.54	3.01
ILMN_1730491	FMNL2	formin-like 2 (FMNL2), mRNA.	NM_052905.3	6.33	6.83	0.51	3.01
ILMN_2211122	SEDLP	spondyloepiphyseal dysplasia, late, pseudogene (SEDLP) on chromosome 19.	NR_002166.1	8.59	9.09	0.5	3
ILMN_2370907	RAD51L3	RAD51-like 3 (S. cerevisiae) (RAD51L3), transcript variant 1, mRNA.	NM_002878.2	6.55	5.98	-0.56	2.98
ILMN_1774974	CLUAP1	clusterin associated protein 1 (CLUAP1), transcript variant 1, mRNA.	NM_015041.1	8.93	8.26	-0.67	2.98
ILMN_1714691	HOXD10	homeobox D10 (HOXD10), mRNA.	NM_002148.3	8.87	9.37	0.51	2.98
ILMN_1717207	MMP25	matrix metallopeptidase 25 (MMP25), mRNA.	NM_022468.4	6.61	6.11	-0.51	2.97
[truncated: 99 more rows]

## Sheet: 2h siRNA
Illumina Identifier	HGNC Gene Symbol	Gene Description	Refseq ID	DF1+ TGFb 2h	DF1+A1+TGFb 2h	LR +/- A1 2h	-log10 pVAL LR +/- A1 2h
ILMN_1667295	VASN	vasorin (VASN), mRNA.	NM_138440.2	11.37	9.61	-1.76	13.63
ILMN_1670130	ARID3A	AT rich interactive domain 3A (BRIGHT-like) (ARID3A), mRNA.	NM_005224.2	9.93	8.65	-1.28	12.44
ILMN_2399300	NAV2	neuron navigator 2 (NAV2), transcript variant 2, mRNA.	NM_145117.3	9.18	7.82	-1.36	12.17
ILMN_1812968	SOX18	SRY (sex determining region Y)-box 18 (SOX18), mRNA.	NM_018419.2	12.83	11.37	-1.45	12.17
ILMN_2197365	RGS2	regulator of G-protein signalling 2, 24kDa (RGS2), mRNA.	NM_002923.1	8.4	10.46	2.06	12.14
ILMN_1744381	SERPINE1	serpin peptidase inhibitor, clade E (nexin, plasminogen activator inhibitor type 1), member 1 (SERPINE1), mRNA.	NM_000602.1	12.09	10.7	-1.39	12.14
ILMN_1698666	CST6	cystatin E/M (CST6), mRNA.	NM_001323.2	9.34	8.13	-1.21	10.94
ILMN_1812297	CYP26B1	cytochrome P450, family 26, subfamily B, polypeptide 1 (CYP26B1), mRNA.	NM_019885.2	10.58	9.11	-1.47	10.6
ILMN_2189027	LIPG	lipase, endothelial (LIPG), mRNA.	NM_006033.2	12.43	11.35	-1.09	10.55
ILMN_1712475	HS3ST2	heparan sulfate (glucosamine) 3-O-sulfotransferase 2 (HS3ST2), mRNA.	NM_006043.1	10.5	9.25	-1.25	10.22
ILMN_1815023	PIM1	pim-1 oncogene (PIM1), mRNA.	NM_002648.2	12.17	11.05	-1.13	10.03
ILMN_1734276	PMEPA1	prostate transmembrane protein, androgen induced 1 (PMEPA1), transcript variant 2, mRNA.	NM_199169.1	13.34	12.29	-1.05	9.83
ILMN_2371458	CXCR7	chemokine (C-X-C motif) receptor 7 (CXCR7), transcript variant 1, mRNA.	NM_001047841.1	12.31	11.3	-1.01	9.81
ILMN_1679754	ADRA1B	adrenergic, alpha-1B-, receptor (ADRA1B), mRNA.	NM_000679.3	9.2	8.05	-1.15	9.69
ILMN_2203891	SMAD7	SMAD family member 7 (SMAD7), mRNA.	NM_005904.2	10.41	9.28	-1.13	9.45
ILMN_1680618	MYC	v-myc myelocytomatosis viral oncogene homolog (avian) (MYC), mRNA.	NM_002467.3	10.61	9.69	-0.91	8.95
ILMN_1670926	GALNAC4S-6ST	B cell RAG associated protein (GALNAC4S-6ST), mRNA.	NM_015892.2	11.64	10.66	-0.98	8.91
ILMN_1663092	CITED2	Cbp/p300-interacting transactivator, with Glu/Asp-rich carboxy-terminal domain, 2 (CITED2), mRNA.	NM_006079.3	7.08	8.63	1.56	8.86
ILMN_1660847	PFKFB3	6-phosphofructo-2-kinase/fructose-2,6-biphosphatase 3 (PFKFB3), mRNA.	NM_004566.2	9.61	8.55	-1.06	8.74
ILMN_1788203	HEY1	hairy/enhancer-of-split related with YRPW motif 1 (HEY1), transcript variant 2, mRNA.	NM_001040708.1	10.35	8.97	-1.38	8.73
ILMN_1729417	GNE	glucosamine (UDP-N-acetyl)-2-epimerase/N-acetylmannosamine kinase (GNE), mRNA.	NM_005476.3	8.09	9.36	1.26	8.72
ILMN_2309156	PMEPA1	prostate transmembrane protein, androgen induced 1 (PMEPA1), transcript variant 2, mRNA.	NM_199169.1	12.62	11.49	-1.13	8.72
ILMN_1775380	SMOX	spermine oxidase (SMOX), transcript variant 4, mRNA.	NM_175842.1	10.75	9.68	-1.07	8.7
ILMN_1752810	LARP6	La ribonucleoprotein domain family, member 6 (LARP6), transcript variant 1, mRNA.	NM_018357.2	9.94	8.91	-1.03	8.68
ILMN_1716608	NGF	nerve growth factor (beta polypeptide) (NGF), mRNA.	NM_002506.2	8.73	7.4	-1.33	8.68
ILMN_1745623	EFCAB4A	EF-hand calcium binding domain 4A (EFCAB4A), mRNA.	NM_173584.3	12.47	11.44	-1.02	8.67
ILMN_1751607	FOSB	FBJ murine osteosarcoma viral oncogene homolog B (FOSB), mRNA.	NM_006732.1	12.31	10.75	-1.56	8.62
ILMN_1697733	CST6	PREDICTED: cystatin E/M (CST6), mRNA.	XM_001129442.1	8.9	7.65	-1.25	8.61
ILMN_1806023	JUN	jun oncogene (JUN), mRNA.	NM_002228.3	11.34	10.08	-1.26	8.6
ILMN_1770293	KLF5	Kruppel-like factor 5 (intestinal) (KLF5), mRNA.	NM_001730.3	6.42	8.15	1.73	8.56
ILMN_1768534	BHLHB2	basic helix-loop-helix domain containing, class B, 2 (BHLHB2), mRNA.	NM_003670.1	12.18	11.28	-0.9	8.54
ILMN_2170209	RASD2	RASD family, member 2 (RASD2), mRNA.	NM_014310.3	7.14	6.13	-1.01	8.47
ILMN_1671557	PHLDA2	pleckstrin homology-like domain, family A, member 2 (PHLDA2), mRNA.	NM_003311.3	10.26	9.14	-1.12	8.21
ILMN_1732197	MN1	meningioma (disrupted in balanced translocation) 1 (MN1), mRNA.	NM_002430.2	9.21	8.05	-1.16	8.14
ILMN_1782050	CEBPD	CCAAT/enhancer binding protein (C/EBP), delta (CEBPD), mRNA.	NM_005195.3	8.58	9.66	1.08	8.09
ILMN_2298301	BNC1	basonuclin 1 (BNC1), mRNA.	NM_001717.2	9.79	8.64	-1.14	7.96
ILMN_1706015	FAM43A	family with sequence similarity 43, member A (FAM43A), mRNA.	NM_153690.4	11.97	10.84	-1.13	7.9
ILMN_1697448	TXNIP	thioredoxin interacting protein (TXNIP), mRNA.	NM_006472.2	9.96	11.44	1.47	7.9
ILMN_2086077	JUNB	jun B proto-oncogene (JUNB), mRNA.	NM_002229.2	11.32	10.11	-1.21	7.62
ILMN_1661197	CLCF1	cardiotrophin-like cytokine factor 1 (CLCF1), mRNA.	NM_013246.2	10.33	9.15	-1.18	7.6
ILMN_2140559	IRX5	iroquois homeobox protein 5 (IRX5), mRNA.	NM_005853.4	7.28	8.5	1.22	7.6
ILMN_1807652	STRA6	stimulated by retinoic acid gene 6 homolog (mouse) (STRA6), mRNA.	NM_022369.2	8.11	7.01	-1.1	7.57
ILMN_2082209	C20orf100	chromosome 20 open reading frame 100 (C20orf100), mRNA.	NM_032883.1	10.45	9.6	-0.85	7.56
ILMN_1745256	CXXC5	CXXC finger 5 (CXXC5), mRNA.	NM_016463.5	13.11	12.24	-0.87	7.56
ILMN_1804007	NANOS3	nanos homolog 3 (Drosophila) (NANOS3), mRNA.	NM_001098622.1	8.87	7.66	-1.21	7.5
ILMN_2367258	SMOX	spermine oxidase (SMOX), transcript variant 2, mRNA.	NM_175840.1	9.76	8.75	-1	7.42
ILMN_1849494		clone 24841 mRNA sequence		7.18	6.21	-0.97	7.41
ILMN_1705144	ULK1	unc-51-like kinase 1 (C. elegans) (ULK1), mRNA.	NM_003565.1	13.56	12.75	-0.82	7.37
ILMN_1662188	WNT11	wingless-type MMTV integration site family, member 11 (WNT11), mRNA.	NM_004626.2	8.19	6.88	-1.31	7.35
ILMN_1735052	ULK1	unc-51-like kinase 1 (C. elegans) (ULK1), mRNA.	NM_003565.1	13.59	12.76	-0.84	7.18
ILMN_2234412	TLE3	transducin-like enhancer of split 3 (E(sp1) homolog, Drosophila) (TLE3), mRNA.	NM_005078.1	8.44	7.46	-0.98	7.09
ILMN_1705231	SLCO2A1	solute carrier organic anion transporter family, member 2A1 (SLCO2A1), mRNA.	NM_005630.1	9.81	8.62	-1.19	6.95
ILMN_1705750	TGM2	transglutaminase 2 (C polypeptide, protein-glutamine-gamma-glutamyltransferase) (TGM2), transcript variant 1, mRNA.	NM_004613.2	10.38	9.25	-1.12	6.95
ILMN_1689037	LIPG	lipase, endothelial (LIPG), mRNA.	NM_006033.2	10.97	9.89	-1.07	6.82
ILMN_2267535	NET1	neuroepithelial cell transforming gene 1 (NET1), transcript variant 2, mRNA.	NM_005863.3	10.54	9.33	-1.21	6.64
ILMN_1686562	KIF13B	kinesin family member 13B (KIF13B), mRNA.	NM_015254.2	9.04	8.21	-0.83	6.49
ILMN_1701308	COL1A1	collagen, type I, alpha 1 (COL1A1), mRNA.	NM_000088.3	8.7	7.54	-1.16	6.37
ILMN_2186061	PFKFB3	6-phosphofructo-2-kinase/fructose-2,6-biphosphatase 3 (PFKFB3), mRNA.	NM_004566.2	12.32	11.59	-0.73	6.33
ILMN_1746085	IGFBP3	insulin-like growth factor binding protein 3 (IGFBP3), transcript variant 2, mRNA.	NM_000598.4	11.58	12.39	0.82	6.3
ILMN_2115005	FGD2	FYVE, RhoGEF and PH domain containing 2 (FGD2), mRNA.	NM_173558.2	9.53	8.52	-1.02	6.29
ILMN_2111237	MN1	meningioma (disrupted in balanced translocation) 1 (MN1), mRNA.	NM_002430.2	9.68	8.77	-0.92	6.29
ILMN_1725946	IRF6	interferon regulatory factor 6 (IRF6), mRNA.	NM_006147.2	12.33	11.62	-0.71	6.21
ILMN_2132599	ANKRD22	ankyrin repeat domain 22 (ANKRD22), mRNA.	NM_144590.1	7.28	8.81	1.53	6.17
ILMN_1687721	PROC	protein C (inactivator of coagulation factors Va and VIIIa) (PROC), mRNA.	NM_000312.1	10.42	9.43	-0.99	6.17
ILMN_1666392	WNT4	wingless-type MMTV integration site family, member 4 (WNT4), mRNA.	NM_030761.3	9.18	8.24	-0.94	6.17
ILMN_1666819	PHLDB1	pleckstrin homology-like domain, family B, member 1 (PHLDB1), mRNA.	NM_015157.1	12.43	11.51	-0.92	6.14
ILMN_2115125	CTGF	connective tissue growth factor (CTGF), mRNA.	NM_001901.2	9.12	7.96	-1.16	6.08
ILMN_1685122	COL9A2	collagen, type IX, alpha 2 (COL9A2), mRNA.	NM_001852.3	8.14	7.22	-0.92	6.01
ILMN_1718607	TSPAN4	tetraspanin 4 (TSPAN4), transcript variant 3, mRNA.	NM_001025235.1	10.03	8.96	-1.07	6.01
ILMN_1806733	COL18A1	collagen, type XVIII, alpha 1 (COL18A1), transcript variant 2, mRNA.	NM_130445.2	9.44	8.61	-0.83	6
ILMN_2357134	SPHK1	sphingosine kinase 1 (SPHK1), transcript variant 1, mRNA.	NM_021972.2	8.65	7.58	-1.07	5.96
ILMN_1672102	PTPRB	protein tyrosine phosphatase, receptor type, B (PTPRB), mRNA.	NM_002837.2	9.11	8.36	-0.75	5.89
ILMN_1762549	ORAOV1	oral cancer overexpressed 1 (ORAOV1), mRNA.	NM_153451.2	11.24	10.59	-0.65	5.76
ILMN_1716265	PGM2L1	phosphoglucomutase 2-like 1 (PGM2L1), mRNA.	NM_173582.3	8.13	7.26	-0.87	5.74
ILMN_2372915	P2RY2	purinergic receptor P2Y, G-protein coupled, 2 (P2RY2), transcript variant 2, mRNA.	NM_002564.2	10.16	9.37	-0.78	5.65
ILMN_1690844	LOC387820	PREDICTED: similar to DnaJ (Hsp40) homolog, subfamily B, member 6 isoform a (LOC387820), mRNA.	XR_019393.1	12.48	11.79	-0.69	5.62
ILMN_1729976	ZNF828	zinc finger protein 828 (ZNF828), mRNA.	NM_032436.1	8.75	9.49	0.75	5.61
ILMN_1702487	SGK	serum/glucocorticoid regulated kinase (SGK), mRNA.	NM_005627.2	9.02	8.1	-0.92	5.6
ILMN_1809613	NGEF	neuronal guanine nucleotide exchange factor (NGEF), mRNA.	NM_019850.1	8.19	7.32	-0.87	5.52
ILMN_1718387	LOR	loricrin (LOR), mRNA.	NM_000427.1	8.57	7.32	-1.26	5.49
ILMN_1712708	TRIM47	tripartite motif-containing 47 (TRIM47), mRNA.	NM_033452.2	10	9.19	-0.81	5.49
ILMN_1746465	FJX1	four jointed box 1 (Drosophila) (FJX1), mRNA.	NM_014344.2	6.82	7.91	1.09	5.46
ILMN_1790338	PRRX2	paired related homeobox 2 (PRRX2), mRNA.	NM_016307.3	8.19	6.98	-1.2	5.45
ILMN_2199389	VIPR1	vasoactive intestinal peptide receptor 1 (VIPR1), mRNA.	NM_004624.2	11.2	10.04	-1.17	5.43
ILMN_1664016	ARHGEF18	rho/rac guanine nucleotide exchange factor (GEF) 18 (ARHGEF18), mRNA.	NM_015318.2	13.01	12.32	-0.68	5.4
ILMN_1748970	ATAD4	ATPase family, AAA domain containing 4 (ATAD4), mRNA.	NM_024320.2	8.96	9.72	0.76	5.38
ILMN_1718977	GADD45B	growth arrest and DNA-damage-inducible, beta (GADD45B), mRNA.	NM_015675.2	9.22	8.22	-1	5.38
ILMN_1780861	LOC653506	PREDICTED: similar to meteorin, glial cell differentiation regulator-like (LOC653506), mRNA.	XM_927769.1	11.69	11.01	-0.67	5.36
ILMN_1783444	DVL1	dishevelled, dsh homolog 1 (Drosophila) (DVL1), transcript variant 2, mRNA.	NM_181870.1	7.73	6.83	-0.9	5.33
ILMN_1722834	RGS12	regulator of G-protein signaling 12 (RGS12), transcript variant 2, mRNA.	NM_002926.3	11.4	10.61	-0.79	5.32
ILMN_2297854	P2RY2	purinergic receptor P2Y, G-protein coupled, 2 (P2RY2), transcript variant 3, mRNA.	NM_176071.1	7.25	6.35	-0.91	5.26
ILMN_1670158	FAM83A	family with sequence similarity 83, member A (FAM83A), transcript variant 2, mRNA.	NM_207006.1	10.34	9.54	-0.8	5.23
ILMN_1732609	KIAA1539	KIAA1539 (KIAA1539), mRNA.	NM_025182.2	9.2	8.38	-0.83	5.23
ILMN_1733616	TFEB	transcription factor EB (TFEB), mRNA.	NM_007162.1	7.44	6.48	-0.96	5.22
ILMN_1810000	RDH16	retinol dehydrogenase 16 (all-trans) (RDH16), mRNA.	NM_003708.3	9.08	8	-1.08	5.2
ILMN_1659206	RARA	retinoic acid receptor, alpha (RARA), transcript variant 1, mRNA.	NM_000964.2	12.11	11.25	-0.86	5.19
ILMN_1672504	PDXK	pyridoxal (pyridoxine, vitamin B6) kinase (PDXK), mRNA.	NM_003681.4	12.78	12.11	-0.67	5.15
ILMN_1730794	SERTAD4	SERTA domain containing 4 (SERTAD4), mRNA.	NM_019605.2	10.37	9.58	-0.79	5.02
ILMN_1799848	ANKRD22	ankyrin repeat domain 22 (ANKRD22), mRNA.	NM_144590.2	6.94	8.51	1.57	4.97
ILMN_2374340	PLAUR	plasminogen activator, urokinase receptor (PLAUR), transcript variant 2, mRNA.	NM_001005376.1	9.43	8.51	-0.92	4.97
ILMN_1720595	MDGA1	MAM domain containing glycosylphosphatidylinositol anchor 1 (MDGA1), mRNA.	NM_153487.3	9.25	8.58	-0.67	4.96
ILMN_1902308		AGENCOURT_13567612 NIH_MGC_184 cDNA clone IMAGE:30326575 5, mRNA sequence		10.56	9.76	-0.79	4.95
ILMN_2314169	PTHLH	parathyroid hormone-like hormone (PTHLH), transcript variant 1, mRNA.	NM_198965.1	12.31	11.67	-0.64	4.92
ILMN_1739594	ACOT11	acyl-CoA thioesterase 11 (ACOT11), transcript variant 2, mRNA.	NM_147161.2	10.94	10.33	-0.61	4.88
ILMN_2148847	C6orf166	chromosome 6 open reading frame 166 (C6orf166), mRNA.	NM_018064.2	10.58	9.95	-0.62	4.88
ILMN_1813704	KIAA1199	KIAA1199 (KIAA1199), mRNA.	NM_018689.1	9.41	8.53	-0.87	4.86
ILMN_1798808	FOXH1	forkhead box H1 (FOXH1), mRNA.	NM_003923.1	7.68	6.86	-0.82	4.85
ILMN_2133100	LPIN2	lipin 2 (LPIN2), mRNA.	NM_014646.2	8.98	8.18	-0.8	4.81
ILMN_1682717	IER3	immediate early response 3 (IER3), mRNA.	NM_003897.3	12.45	11.54	-0.91	4.76
ILMN_1682034	HEY2	hairy/enhancer-of-split related with YRPW motif 2 (HEY2), mRNA.	NM_012259.1	8.05	7.17	-0.89	4.74
ILMN_1680018	RIPK4	receptor-interacting serine-threonine kinase 4 (RIPK4), mRNA.	NM_020639.2	10.04	10.83	0.78	4.74
ILMN_1657679	VAV3	vav 3 guanine nucleotide exchange factor (VAV3), transcript variant 1, mRNA.	NM_006113.4	8.62	9.59	0.97	4.74
ILMN_2359345	NET1	neuroepithelial cell transforming gene 1 (NET1), transcript variant 2, mRNA.	NM_005863.3	11.37	10.58	-0.8	4.72
ILMN_1789400	FOXD2	forkhead box D2 (FOXD2), mRNA.	NM_004474.3	8.33	7.56	-0.78	4.7
ILMN_1756784	FREQ	frequenin homolog (Drosophila) (FREQ), mRNA.	NM_014286.2	9.8	8.86	-0.94	4.63
ILMN_1689306	TMC7	transmembrane channel-like 7 (TMC7), mRNA.	NM_024847.2	9.43	8.56	-0.87	4.62
ILMN_1762606	AQP11	aquaporin 11 (AQP11), mRNA.	NM_173039.1	6.51	7.28	0.77	4.59
ILMN_1812031	PALM	paralemmin (PALM), transcript variant 1, mRNA.	NM_002579.2	10.71	9.96	-0.75	4.59
ILMN_1788107	IL11	interleukin 11 (IL11), mRNA.	NM_000641.2	8.42	7.44	-0.98	4.51
ILMN_1776181	BIRC3	baculoviral IAP repeat-containing 3 (BIRC3), transcript variant 1, mRNA.	NM_001165.3	6.35	7.21	0.86	4.49
ILMN_2396875	IGFBP3	insulin-like growth factor binding protein 3 (IGFBP3), transcript variant 1, mRNA.	NM_001013398.1	10.55	11.3	0.75	4.49
ILMN_1694084	PSCD1	pleckstrin homology, Sec7 and coiled-coil domains 1(cytohesin 1) (PSCD1), transcript variant 2, mRNA.	NM_017456.1	11.8	11.06	-0.74	4.49
ILMN_1730670	FSTL3	follistatin-like 3 (secreted glycoprotein) (FSTL3), mRNA.	NM_005860.2	11	10.16	-0.84	4.47
ILMN_2163790	CGB5	chorionic gonadotropin, beta polypeptide 5 (CGB5), mRNA.	NM_033043.1	9.03	8.2	-0.82	4.45
ILMN_2210601	RNASEL	ribonuclease L (2',5'-oligoisoadenylate synthetase-dependent) (RNASEL), mRNA.	NM_021133.2	8.02	8.68	0.66	4.45
ILMN_1658426	WNT10A	wingless-type MMTV integration site family, member 10A (WNT10A), mRNA.	NM_025216.2	10.15	10.97	0.82	4.45
ILMN_1771841	FOSL1	FOS-like antigen 1 (FOSL1), mRNA.	NM_005438.2	7.68	6.88	-0.8	4.35
ILMN_1666845	KRT17	keratin 17 (KRT17), mRNA.	NM_000422.1	14.41	13.79	-0.62	4.34
ILMN_2128639	C10orf47	chromosome 10 open reading frame 47 (C10orf47), mRNA.	NM_153256.2	8.56	7.81	-0.75	4.29
ILMN_1730223	RNF39	ring finger protein 39 (RNF39), transcript variant 2, mRNA.	NM_170769.1	8.63	9.25	0.62	4.28
ILMN_1669572	RNF126	ring finger protein 126 (RNF126), mRNA.	NM_194460.1	9.41	8.75	-0.66	4.24
ILMN_2318638	TGIF1	TGFB-induced factor homeobox 1 (TGIF1), transcript variant 1, mRNA.	NM_170695.2	11.04	10.39	-0.65	4.2
ILMN_1651438	ZFPM1	zinc finger protein, multitype 1 (ZFPM1), mRNA.	NM_153813.2	10.06	9.39	-0.67	4.11
ILMN_1687768	NCOA7	nuclear receptor coactivator 7 (NCOA7), mRNA.	NM_181782.2	10.21	10.83	0.61	4.04
ILMN_1652082	ELF4	E74-like factor 4 (ets domain transcription factor) (ELF4), mRNA.	NM_001421.2	11.93	11.3	-0.63	4.03
ILMN_1660204	IGSF9B	immunoglobulin superfamily, member 9B (IGSF9B), mRNA.	NM_014987.1	8.47	7.4	-1.08	4.03
ILMN_2388397	LYPD1	LY6/PLAUR domain containing 1 (LYPD1), transcript variant 2, mRNA.	NM_001077427.2	9.03	8.37	-0.67	4.01
ILMN_1797875	ALOX5AP	arachidonate 5-lipoxygenase-activating protein (ALOX5AP), mRNA.	NM_001629.2	7.68	6.85	-0.83	4
ILMN_1769810	ARL6IP5	ADP-ribosylation-like factor 6 interacting protein 5 (ARL6IP5), mRNA.	NM_006407.3	10.52	11.21	0.69	4
ILMN_1688480	CCND1	cyclin D1 (CCND1), mRNA.	NM_053056.2	14.15	13.6	-0.55	3.98
ILMN_1656361	LOC201175	hypothetical protein LOC201175 (LOC201175), mRNA.	NM_174919.2	7.83	7.05	-0.78	3.97
ILMN_1813766	RCL1	RNA terminal phosphate cyclase-like 1 (RCL1), mRNA.	NM_005772.2	8.26	7.58	-0.68	3.96
ILMN_2405305	ARNTL	aryl hydrocarbon receptor nuclear translocator-like (ARNTL), transcript variant 2, mRNA.	NM_001030272.1	8.11	7.45	-0.66	3.89
ILMN_2376723	CDKN2B	cyclin-dependent kinase inhibitor 2B (p15, inhibits CDK4) (CDKN2B), transcript variant 2, mRNA.	NM_078487.2	11.88	11.23	-0.65	3.81
ILMN_1723198	CDKN2B	cyclin-dependent kinase inhibitor 2B (p15, inhibits CDK4) (CDKN2B), transcript variant 1, mRNA.	NM_004936.3	10.73	9.74	-0.99	3.81
ILMN_1794399	SNRK	SNF related kinase (SNRK), mRNA.	NM_017719.3	8.21	7.6	-0.62	3.79
ILMN_1663080	LFNG	LFNG O-fucosylpeptide 3-beta-N-acetylglucosaminyltransferase (LFNG), transcript variant 1, mRNA.	NM_001040167.1	12.93	12.32	-0.61	3.78
ILMN_1699829	CTGF	connective tissue growth factor (CTGF), mRNA.	NM_001901.1	9.05	8.03	-1.01	3.75
ILMN_1872318	LOC731050	PREDICTED: hypothetical protein LOC731050 (LOC731050), mRNA.	XM_001132484.1	6.84	6.16	-0.68	3.7
ILMN_1696276	ZNF653	zinc finger protein 653 (ZNF653), mRNA.	NM_138783.2	9.75	9.16	-0.6	3.66
ILMN_1684554	COL16A1	collagen, type XVI, alpha 1 (COL16A1), mRNA.	NM_001856.3	10.34	9.69	-0.65	3.65
ILMN_1683916	PEX13	peroxisome biogenesis factor 13 (PEX13), mRNA.	NM_002618.2	10.8	10.17	-0.63	3.65
ILMN_1720771	STX11	syntaxin 11 (STX11), mRNA.	NM_003764.2	7.32	6.54	-0.78	3.65
ILMN_1745778	SLC45A4	PREDICTED: solute carrier family 45, member 4, transcript variant 2 (SLC45A4), mRNA.	XM_933796.2	8.19	7.44	-0.74	3.64
ILMN_1700081	FST	follistatin (FST), transcript variant FST344, mRNA.	NM_013409.1	12.75	12.1	-0.65	3.58
ILMN_1739840	LRRC8A	leucine rich repeat containing 8 family, member A (LRRC8A), mRNA.	NM_019594.2	11.91	11.4	-0.5	3.58
ILMN_2318643	TGIF1	TGFB-induced factor homeobox 1 (TGIF1), transcript variant 1, mRNA.	NM_170695.2	10.64	10.01	-0.63	3.55
ILMN_2289093	KIAA1618	KIAA1618 (KIAA1618), mRNA.	NM_020954.2	9.47	8.88	-0.59	3.54
ILMN_2308849	MYADM	myeloid-associated differentiation marker (MYADM), transcript variant 4, mRNA.	NM_001020820.1	12.02	11.4	-0.62	3.54
ILMN_1703593	BAIAP2L1	BAI1-associated protein 2-like 1 (BAIAP2L1), mRNA.	NM_018842.3	11.44	10.96	-0.48	3.53
ILMN_1790228	FURIN	furin (paired basic amino acid cleaving enzyme) (FURIN), mRNA.	NM_002569.2	9.02	8.33	-0.69	3.5
ILMN_1698484	RHOV	ras homolog gene family, member V (RHOV), mRNA.	NM_133639.2	7.04	7.94	0.9	3.5
ILMN_1680591	RTKN	rhotekin (RTKN), transcript variant 2, mRNA.	NM_033046.2	11.9	11.27	-0.63	3.5
ILMN_1705814	KRT80	keratin 80 (KRT80), transcript variant 1, mRNA.	NM_182507.2	12.41	11.89	-0.52	3.49
ILMN_1662192	ZNF248	zinc finger protein 248 (ZNF248), mRNA.	NM_021045.1	7.26	8.04	0.78	3.49
ILMN_1674160	BIN1	bridging integrator 1 (BIN1), transcript variant 4, mRNA.	NM_139346.1	10.12	9.57	-0.55	3.48
ILMN_1771264	ELL3	elongation factor RNA polymerase II-like 3 (ELL3), mRNA.	NM_025165.2	9.05	9.67	0.62	3.46
ILMN_1764503	C21orf124	chromosome 21 open reading frame 124 (C21orf124), mRNA.	NM_032920.1	8.14	7.55	-0.59	3.45
ILMN_1812618	CENTD3	centaurin, delta 3 (CENTD3), mRNA.	NM_022481.5	11.61	11	-0.62	3.44
ILMN_1730995	AFAP1L2	actin filament associated protein 1-like 2 (AFAP1L2), transcript variant 1, mRNA.	NM_001001936.1	11.32	10.54	-0.77	3.43
ILMN_1705442	CMTM3	CKLF-like MARVEL transmembrane domain containing 3 (CMTM3), transcript variant 1, mRNA.	NM_144601.2	9.03	8.41	-0.62	3.43
ILMN_1660794	LBH	PREDICTED: hypothetical protein DKFZp566J091 (LBH), mRNA.	XM_001132517.1	7.52	6.78	-0.73	3.43
ILMN_1743619	NEDD9	neural precursor cell expressed, developmentally down-regulated 9 (NEDD9), transcript variant 2, mRNA.	NM_182966.2	8.28	7.47	-0.81	3.43
ILMN_1785699	PTHLH	parathyroid hormone-like hormone (PTHLH), transcript variant 3, mRNA.	NM_198964.1	10.97	10.46	-0.51	3.42
ILMN_1703123	AXUD1	AXIN1 up-regulated 1 (AXUD1), mRNA.	NM_033027.2	9.87	9.25	-0.62	3.4
ILMN_1743373	DLL1	delta-like 1 (Drosophila) (DLL1), mRNA.	NM_005618.3	8.45	9.05	0.6	3.4
ILMN_1720865	OSBPL7	oxysterol binding protein-like 7 (OSBPL7), transcript variant 1, mRNA.	NM_145798.2	12.57	12.04	-0.52	3.4
ILMN_1666222	PHACTR3	phosphatase and actin regulator 3 (PHACTR3), transcript variant 3, mRNA.	NM_183246.1	7.83	7.01	-0.81	3.4
ILMN_1796755	ITGB5	integrin, beta 5 (ITGB5), mRNA. XM_944688 XM_944693	NM_002213.3	9.39	8.78	-0.61	3.39
ILMN_2214678	MXD1	MAX dimerization protein 1 (MXD1), mRNA.	NM_002357.2	9.89	8.91	-0.98	3.38
ILMN_1772824	WNT5B	wingless-type MMTV integration site family, member 5B (WNT5B), transcript variant 1, mRNA.	NM_032642.2	9.65	8.92	-0.74	3.38
ILMN_1758719	NEDD9	neural precursor cell expressed, developmentally down-regulated 9 (NEDD9), transcript variant 1, mRNA.	NM_006403.2	7.98	7.23	-0.75	3.37
ILMN_1775822	PDGFB	platelet-derived growth factor beta polypeptide (simian sarcoma viral (v-sis) oncogene homolog) (PDGFB), transcript variant 1, mRNA.	NM_002608.1	7.32	6.63	-0.69	3.37
ILMN_1655191	CASZ1	castor zinc finger 1 (CASZ1), transcript variant 2, mRNA.	NM_017766.3	11.04	10.48	-0.56	3.36
ILMN_1746158	HOXD11	homeobox D11 (HOXD11), mRNA.	NM_021192.2	9.38	8.62	-0.76	3.36
ILMN_1724832	OVOL2	ovo-like 2 (Drosophila) (OVOL2), mRNA.	NM_021220.2	12.44	11.96	-0.47	3.35
ILMN_1776936	ANKRD38	ankyrin repeat domain 38 (ANKRD38), mRNA.	NM_181712.3	9.62	8.47	-1.15	3.33
ILMN_1717639	SNF1LK	SNF1-like kinase (SNF1LK), mRNA.	NM_173354.3	9.62	8.93	-0.69	3.32
ILMN_1727361	LEMD3	LEM domain containing 3 (LEMD3), mRNA.	NM_014319.3	9.98	9.08	-0.9	3.28
[truncated: 298 more rows]

## Sheet: 4h siRNA 
Illumina Identifier	HGNC gene symbol	Gene Description	Refseq ID	DF1+ TGFb 4h	DF1+A1+TGFb 4h	LR +/- A1 4h	-log10 pVAL LR +/- A1 4h
[truncated: 487 more rows]

[truncated: 1 more sheets: 12h siRNA]
