# Supplementary material for: Phenocopy – A Strategy to Qualify Chemical Compounds during Hit-to-Lead and/or Lead Optimization
Source: PLoS One. 2010 Dec 10;5(12):e14272. doi: 10.1371/journal.pone.0014272 (PMC3000806; doi:10.1371/journal.pone.0014272)
Supplement: Table S2 — Off-target Signatures. NCE dependent Off-target Signatures identified upon 2h, 4h and 12h stimulation (2.33 MB XLS) [file pone.0014272.s009.xls]

## Sheet: Legend
	Supplement Table 2 - List of NCE off-targets for the respective time points. Listed are all identified probes per gene
	Abbreviation			Example
	LR	log ratio		BI1 LR(0.08uM+TGFb/UT+TGFb+DMSO):
	-10log(pVAL)	negative log10 p-value
	UT	not with NCE treated cells; untreated cells		NCE Log ratio of the following samples (cells treated with 0.08uM of the NCE (0.08uM)that are stimulated with TGF-beta (+TGFb) versus (/) untreated cells (UT) that were stimulated with TGF-beta (+TGFb) and treated with DMSO (+DMSO))
	+TGFb	in presence of TGF-beta stimulation
	-TGFb	with out TGF-beta stimulation
	+DMSO	in presence of DMSO
	u	µ

## Sheet: BI1_2h
Illumina Identifier	HGNC gene symbol	Gene Description	Refseq ID	BI1 LR(0.08uM+TGFb/UT+DMSO+TGFb)	BI1 -log10(pVAL(0.08uM+TGFb/UT+DMSO+TGFb))	BI1 LR(2uM+TGFb/UT+DMSO+TGFb)	BI1 -log10(pVAL(2uM+TGFb/UT+DMSO+TGFb))	BI1 LR(0.08uM-TGFb/UT+DMSO)	BI1 -log10(pVAL(0.08uM-TGFb/UT+DMSO))	BI1 LR(2uM-TGFb/UT+DMSO)	BI1 -log10(pVAL(2uM-TGFb/UT+DMSO))	BI1 LR(2uM-TGFb/0.08uM-TGFb)	BI1 -log10(pVAL(2uM-TGFb/0.08uM-TGFb))	BI1 LR(2uM+TGFb/0.08uM+TGFb)	BI1 -log10(pVAL(2uM+TGFb/0.08uM+TGFb))
ILMN_1731433	ABP1	amiloride binding protein 1 (amine oxidase (copper-containing)) (ABP1), mRNA.	NM_001091.2	2.81	11.67	2.77	11.48	2.83	17.97	2.85	18.24	0.02	0	-0.04	0.01
ILMN_1687035	ADAMTSL4	ADAMTS-like 4 (ADAMTSL4), transcript variant 2, mRNA.	NM_025008.3	1.22	9.43	1.42	11.52	0.93	11.37	1.18	16.76	0.25	0.36	0.2	0.13
ILMN_1762294	ADAMTSL4	ADAMTS-like 4 (ADAMTSL4), transcript variant 2, mRNA.	NM_025008.3	1.12	5.72	1.39	8.05	0.89	9.95	1.18	16.03	0.29	0.52	0.27	0.15
ILMN_1814526	ADD3	adducin 3 (gamma) (ADD3), transcript variant 3, mRNA.	NM_001121.2	0.58	2.12	1.02	5.77	1.41	11.37	1.38	11.08	-0.02	0	0.44	0.58
ILMN_2223359	ADH7	alcohol dehydrogenase 7 (class IV), mu or sigma polypeptide (ADH7), mRNA.	NM_000673.3	1.54	7.42	1.56	7.68	2.17	23.92	1.96	20.55	-0.22	0.11	0.02	0
ILMN_1702858	ADHFE1	alcohol dehydrogenase, iron containing, 1 (ADHFE1), mRNA.	NM_144650.2	1.29	7.25	1.67	10.39	1.15	9.26	1.09	8.39	-0.06	0.01	0.37	0.31
ILMN_2363634	ADHFE1	alcohol dehydrogenase, iron containing, 1 (ADHFE1), transcript variant 1, mRNA.	NM_001077593.1	1.02	5.29	0.91	4.56	1.12	9.42	0.93	6.82	-0.19	0.09	-0.1	0.03
ILMN_2412336	AKR1C2	aldo-keto reductase family 1, member C2 (dihydrodiol dehydrogenase 2; bile acid binding protein; 3-alpha hydroxysteroid dehydrogenase, type III) (AKR1C2), transcript variant 1, mRNA. XM_943424 XM_943425 XM_943427	NM_001354.4	1.19	6.95	1.28	7.85	1.52	24.17	1.25	18.06	-0.27	0.45	0.09	0.03
ILMN_2096372	ALDH1A1	aldehyde dehydrogenase 1 family, member A1 (ALDH1A1), mRNA.	NM_000689.3	1.16	3.72	1.08	3.45	1.86	11.25	1.74	10.1	-0.11	0.02	-0.07	0.01
ILMN_1709348	ALDH1A1	aldehyde dehydrogenase 1 family, member A1 (ALDH1A1), mRNA.	NM_000689.3	1.97	4.83	1.81	4.31	1.62	3.49	1.74	4.04	0.12	0.01	-0.16	0.02
ILMN_1702503	ALDH3A1	aldehyde dehydrogenase 3 family, memberA1 (ALDH3A1), mRNA.	NM_000691.3	1.85	12.01	1.88	12.29	1.51	17.04	1.52	17.36	0.01	0	0.03	0.01
ILMN_2363880	ALDH3B2	aldehyde dehydrogenase 3 family, member B2 (ALDH3B2), transcript variant 2, mRNA.	NM_001031615.1	1.34	6.86	1.45	7.82	1.14	9.56	1.06	8.38	-0.08	0.02	0.11	0.03
ILMN_1763666	ALDH3B2	aldehyde dehydrogenase 3 family, member B2 (ALDH3B2), transcript variant 2, mRNA.	NM_001031615.1	2.49	11.19	2.45	11.01	2.33	23.6	2.16	21.09	-0.17	0.06	-0.03	0
ILMN_1801851	ALPPL2	alkaline phosphatase, placental-like 2 (ALPPL2), mRNA.	NM_031313.1	1.61	7.82	1.81	9.31	1.45	13.88	1.6	16.19	0.14	0.05	0.2	0.06
ILMN_1667748	ANKRD33	ankyrin repeat domain 33 (ANKRD33), mRNA.	NM_182608.2	1.12	4.42	1.21	5.16	0.91	4.75	1.1	6.77	0.19	0.07	0.09	0.02
ILMN_1798006	ANKRD35	ankyrin repeat domain 35 (ANKRD35), mRNA.	NM_144698.2	1.86	12.32	1.57	9.99	1.49	17.99	1.07	10.49	-0.42	0.92	-0.29	0.18
ILMN_2217601	ANXA9	annexin A9 (ANXA9), mRNA.	NM_003568.1	1.68	7.88	1.57	7.26	1.94	17.34	1.65	13.51	-0.28	0.16	-0.11	0.02
ILMN_1656951	APCDD1	adenomatosis polyposis coli down-regulated 1 (APCDD1), mRNA.	NM_153000.3	2.02	15.45	1.58	11.77	1.25	11	1.19	10.19	-0.06	0.01	-0.44	0.69
ILMN_1796737	APM-1	PREDICTED: BTB/POZ-zinc finger protein-like (APM-1), mRNA.	XM_113971.4	1.14	7.64	1.38	10.07	1.37	10.83	1.39	11.1	0.02	0	0.24	0.16
ILMN_2219466	APOBEC3B	apolipoprotein B mRNA editing enzyme, catalytic polypeptide-like 3B (APOBEC3B), mRNA.	NM_004900.3	0.87	2.67	1.12	4.31	1.09	8.56	0.92	6.39	-0.16	0.07	0.25	0.09
ILMN_2408851	ARHGAP30	Rho GTPase activating protein 30 (ARHGAP30), transcript variant 2, mRNA.	NM_181720.2	2.03	12.43	1.76	10.46	0.74	3.76	1.53	13.83	0.79	2.84	-0.27	0.13
ILMN_1723412	ASCL2	achaete-scute complex homolog 2 (Drosophila) (ASCL2), mRNA.	NM_005170.2	1.2	6.46	1.04	5.33	1.06	9.21	0.59	3.06	-0.47	1.05	-0.16	0.05
ILMN_1708778	ASS1	argininosuccinate synthetase 1 (ASS1), transcript variant 1, mRNA.	NM_000050.4	2.11	9.61	2.25	10.52	2	28.05	1.99	27.99	-0.01	0	0.14	0.03
ILMN_2395451	ASS1	argininosuccinate synthetase 1 (ASS1), transcript variant 2, mRNA.	NM_054012.3	2.08	6.95	2.2	7.67	2.44	24.51	2.38	23.76	-0.06	0.01	0.12	0.02
ILMN_1726025	ASXL1	additional sex combs like 1 (Drosophila) (ASXL1), mRNA.	NM_015338.4	1.34	7.61	1.5	9.02	1.04	10.93	0.9	8.46	-0.14	0.07	0.16	0.06
ILMN_1812073	ATP6V1B1	ATPase, H+ transporting, lysosomal 56/58kDa, V1 subunit B1 (Renal tubular acidosis with deafness) (ATP6V1B1), mRNA.	NM_001692.3	2.96	14.26	3.1	14.88	2.99	31.6	2.81	29.41	-0.17	0.06	0.13	0.03
ILMN_2089073	ATP9A	ATPase, class II, type 9A (ATP9A), mRNA.	NM_006045.1	1.21	9.4	0.81	5.3	0.98	11.66	1.03	12.53	0.04	0.01	-0.4	0.72
ILMN_2376771	ATR	ataxia telangiectasia and Rad3 related (ATR), mRNA.	NM_001184.2	1.42	6.09	1.06	3.91	1.72	12.92	1.58	11.23	-0.14	0.04	-0.36	0.17
ILMN_2231911	AUH	AU RNA binding protein/enoyl-Coenzyme A hydratase (AUH), nuclear gene encoding mitochondrial protein, mRNA.	NM_001698.1	1.12	8.51	0.96	7.01	1.08	10.67	0.78	5.98	-0.3	0.37	-0.15	0.08
ILMN_1690682	B3GALT4	UDP-Gal:betaGlcNAc beta 1,3-galactosyltransferase, polypeptide 4 (B3GALT4), mRNA.	NM_003782.3	1.23	6.03	1.03	4.66	1.06	7.45	0.65	2.95	-0.41	0.51	-0.2	0.07
ILMN_1814686	BCMO1	beta-carotene 15,15'-monooxygenase 1 (BCMO1), mRNA.	NM_017429.2	1	7.3	1.31	10.62	1.77	20.73	1.38	14	-0.39	0.61	0.31	0.37
ILMN_1699989	BNIPL	BCL2/adenovirus E1B 19kD interacting protein like (BNIPL), mRNA.	NM_138278.2	1.58	6.28	1.61	6.63	1.42	9.88	0.96	4.79	-0.47	0.51	0.03	0
ILMN_1802192	C10orf99	chromosome 10 open reading frame 99 (C10orf99), mRNA.	NM_207373.2	1.64	7.39	1.89	9.15	1.3	11.93	1.21	10.64	-0.09	0.02	0.25	0.08
ILMN_1713744	C14orf132	chromosome 14 open reading frame 132 (C14orf132), mRNA.	NM_020215.2	0.88	5.22	1.29	9.32	1.28	10.7	1.28	10.69	0	0	0.41	0.61
ILMN_1693630	C16orf7	chromosome 16 open reading frame 7 (C16orf7), mRNA.	NM_004913.2	1.47	8.33	1.3	7.15	1.3	14.8	1.18	12.83	-0.11	0.04	-0.16	0.06
ILMN_1754894	C1orf162	chromosome 1 open reading frame 162 (C1orf162), mRNA.	NM_174896.2	-0.12	0.19	2.11	17.75	-0.24	0.62	2.08	31	2.32	32.3	2.24	16.85
ILMN_1797735	C1orf21	chromosome 1 open reading frame 21 (C1orf21), mRNA.	NM_030806.3	0.67	4.11	1.46	12.77	0.5	3.59	1.3	19.51	0.81	6.85	0.79	4.09
ILMN_1786470	C1orf74	chromosome 1 open reading frame 74 (C1orf74), mRNA.	NM_152485.2	1.4	12.87	1.56	14.52	0.71	6.17	1.31	17.54	0.6	3.02	0.16	0.1
ILMN_1733288	C1RL	complement component 1, r subcomponent-like (C1RL), mRNA.	NM_016546.1	1.05	6.11	1.37	9.09	1.23	13.62	1.22	13.46	-0.01	0	0.32	0.27
ILMN_2198270	C20orf106	chromosome 20 open reading frame 106 (C20orf106), mRNA.	NM_001012971.2	-0.41	1.52	0.61	3.25	-0.27	0.79	0.76	6.13	1.03	8.48	1.02	5.78
ILMN_2174711	C21orf129	chromosome 21 open reading frame 129 (C21orf129), mRNA.	NM_152506.1	1.76	8.71	2.13	11.31	1.63	11.28	1.29	7.42	-0.35	0.2	0.37	0.2
ILMN_1690454	C3orf54	chromosome 3 open reading frame 54 (C3orf54), mRNA.	NM_203370.1	1.16	10.5	0.65	4.6	1.21	13.93	0.66	4.8	-0.55	2.1	-0.51	1.83
ILMN_1781745	C9orf152	chromosome 9 open reading frame 152 (C9orf152), mRNA.	NM_001012993.1	0.9	6.79	3.04	26.07	1.22	10.61	2.91	38.1	1.7	15.53	2.14	17.05
ILMN_1683175	C9orf23	chromosome 9 open reading frame 23 (C9orf23), transcript variant 1, mRNA.	NM_148178.1	0.94	7.48	1.23	10.83	1.1	11.5	1.07	10.95	-0.03	0.01	0.29	0.38
ILMN_1674629	C9orf3	chromosome 9 open reading frame 3 (C9orf3), mRNA.	NM_032823.3	1.76	18.19	1.02	9.89	1.3	16.18	0.86	8.08	-0.44	1.25	-0.74	4.73
ILMN_1799320	C9orf37	chromosome 9 open reading frame 37 (C9orf37), mRNA.	NM_032937.3	1.22	7.61	1.13	6.91	1.08	10.5	1.11	11.03	0.03	0.01	-0.09	0.03
ILMN_1719998	C9orf45	PREDICTED: chromosome 9 open reading frame 45 (C9orf45), misc RNA.	XR_017862.1	0.34	0.9	1.25	8.81	0.65	4.55	1.14	12.61	0.49	1.6	0.92	4.12
ILMN_1813837	C9orf9	chromosome 9 open reading frame 9 (C9orf9), mRNA.	NM_018956.3	1	6.7	1.21	8.83	0.86	5.93	1.06	8.67	0.2	0.11	0.2	0.12
ILMN_1674650	C9orf95	chromosome 9 open reading frame 95 (C9orf95), mRNA.	NM_017881.1	1.47	9.01	1.23	7.12	1.55	11.63	1.36	9.4	-0.18	0.06	-0.24	0.12
ILMN_1749118	CALML5	calmodulin-like 5 (CALML5), mRNA.	NM_017422.3	2.28	10.08	1.66	6.58	1.19	9.16	1.12	8.27	-0.07	0.01	-0.62	0.48
ILMN_2359601	CAMK2G	calcium/calmodulin-dependent protein kinase (CaM kinase) II gamma (CAMK2G), transcript variant 5, mRNA.	NM_172172.1	0.84	2.36	1.09	3.84	0.74	4.83	1.06	9.3	0.32	0.37	0.24	0.08
ILMN_1655191	CASZ1	castor zinc finger 1 (CASZ1), transcript variant 2, mRNA.	NM_017766.3	1.24	12.32	1.65	16.73	0.78	6.86	1.3	16.69	0.53	2.1	0.41	1.23
ILMN_1657361	CBX7	chromobox homolog 7 (CBX7), mRNA.	NM_175709.2	1.33	6.72	1.38	7.23	1.09	6	0.46	1.08	-0.63	1.13	0.05	0.01
ILMN_1789266	CCDC25	coiled-coil domain containing 25 (CCDC25), mRNA.	NM_018246.2	0.64	4.12	1.13	9.69	0.82	8.87	1.13	15.18	0.31	0.61	0.48	1.47
ILMN_2377669	CD247	CD247 molecule (CD247), transcript variant 1, mRNA.	NM_198053.1	0.1	0.14	1.49	12.14	0.1	0.18	2.27	41.66	2.17	35.93	1.39	9.27
ILMN_1676924	CD247	CD247 molecule (CD247), transcript variant 2, mRNA.	NM_000734.2	0.17	0.37	1.5	13.64	0.21	0.59	2.03	35.56	1.82	27.77	1.33	10
ILMN_1760247	CD70	CD70 molecule (CD70), mRNA.	NM_001252.3	1.32	7.34	1.75	10.87	1.28	10.58	1.12	8.37	-0.16	0.06	0.43	0.43
ILMN_1695423	CD9	CD9 molecule (CD9), mRNA.	NM_001769.2	1.28	5.06	1.32	5.46	1.83	23.02	1.76	21.66	-0.08	0.02	0.04	0.01
ILMN_1714592	CDA	cytidine deaminase (CDA), mRNA.	NM_001785.2	1.54	11.78	1.59	12.3	1.34	12.28	1.33	12.22	-0.01	0	0.05	0.01
ILMN_1781987	CDK5	cyclin-dependent kinase 5 (CDK5), mRNA.	NM_004935.2	1.33	6.4	1.24	5.87	1.09	9.9	0.4	1.43	-0.69	2.92	-0.09	0.02
ILMN_1717714	CDKN2A	cyclin-dependent kinase inhibitor 2A (melanoma, p16, inhibits CDK4) (CDKN2A), transcript variant 1, mRNA.	NM_000077.3	1.24	7.33	0.79	3.66	0.92	8.65	1.05	10.79	0.12	0.06	-0.46	0.58
ILMN_2331205	CHKB	choline kinase beta (CHKB), transcript variant 1, mRNA.	NM_005198.3	1.3	6.98	1.66	9.97	0.92	6.16	1.09	8.46	0.18	0.08	0.36	0.27
ILMN_1679176	CLCA4	chloride channel, calcium activated, family member 4 (CLCA4), mRNA.	NM_012128.2	2.37	9.01	2.21	8.28	1.93	9.49	1.86	8.87	-0.07	0.01	-0.16	0.03
ILMN_2399363	CLEC4A	C-type lectin domain family 4, member A (CLEC4A), transcript variant 4, mRNA.	NM_194448.1	0.04	0.03	1.28	8.08	0.23	0.62	1.63	24.25	1.4	16.55	1.24	6.12
ILMN_1796423	CLIC3	chloride intracellular channel 3 (CLIC3), mRNA.	NM_004669.2	2.73	14.34	2.56	13.36	2.88	26.68	2.59	23.07	-0.29	0.13	-0.17	0.04
ILMN_1803838	CNFN	cornifelin (CNFN), mRNA.	NM_032488.2	1.89	9.88	1.99	10.59	1.43	14.75	1.67	18.84	0.24	0.16	0.1	0.02
ILMN_1690170	CRABP2	cellular retinoic acid binding protein 2 (CRABP2), mRNA.	NM_001878.2	1.91	11.93	1.9	11.87	1.87	26.36	1.91	27.19	0.04	0.01	-0.01	0
ILMN_1752451	CTSH	cathepsin H (CTSH), transcript variant 1, mRNA.	NM_004390.3	1.7	7.9	1.37	5.85	1.21	7.17	1.19	6.94	-0.02	0	-0.33	0.14
ILMN_2393712	CTTN	cortactin (CTTN), transcript variant 2, mRNA.	NM_138565.1	1.21	7.91	1.42	9.99	1.03	10.17	1.04	10.23	0	0	0.21	0.12
ILMN_1745256	CXXC5	CXXC finger 5 (CXXC5), mRNA.	NM_016463.5	2.05	12.4	1.24	6.34	1.05	11.1	1.05	11.01	-0.01	0	-0.81	1.99
ILMN_1665437	CYP2E1	cytochrome P450, family 2, subfamily E, polypeptide 1 (CYP2E1), mRNA.	NM_000773.3	0.87	6.96	1.14	10.29	0.97	15.56	1.18	21.05	0.21	0.34	0.27	0.36
ILMN_1810942	CYP3A5	cytochrome P450, family 3, subfamily A, polypeptide 5 (CYP3A5), mRNA.	NM_000777.2	4.02	13.08	4.08	13.32	4.61	25.8	3.78	19.38	-0.83	0.52	0.06	0.01
ILMN_2173291	CYP4B1	cytochrome P450, family 4, subfamily B, polypeptide 1 (CYP4B1), mRNA.	NM_000779.2	0.88	4.19	1.24	7.35	1.02	7.1	0.87	5.29	-0.15	0.05	0.36	0.32
ILMN_1659215	CYP4B1	cytochrome P450, family 4, subfamily B, polypeptide 1 (CYP4B1), transcript variant 2, mRNA.	NM_000779.3	1.44	6.53	1.58	7.63	1.18	10.29	1.02	8	-0.16	0.07	0.14	0.04
ILMN_1809384	CYP4F12	cytochrome P450, family 4, subfamily F, polypeptide 12 (CYP4F12), mRNA.	NM_023944.2	2.27	13.5	2.42	14.5	2.18	20.22	1.88	16.09	-0.3	0.18	0.15	0.04
ILMN_1736190	CYP4F3	cytochrome P450, family 4, subfamily F, polypeptide 3 (CYP4F3), mRNA.	NM_000896.1	1.87	12.25	1.89	12.47	1.75	12.77	1.41	8.81	-0.34	0.2	0.02	0
ILMN_2175317	CYP4X1	cytochrome P450, family 4, subfamily X, polypeptide 1 (CYP4X1), mRNA.	NM_178033.1	1.2	8.65	0.84	5.25	1.33	15.17	1.17	12.38	-0.16	0.08	-0.35	0.45
ILMN_1687556	DAPL1	death associated protein-like 1 (DAPL1), mRNA.	NM_001017920.1	1.82	8.16	1.64	7.13	2.15	17.58	2.27	19.14	0.11	0.02	-0.18	0.05
ILMN_1685441	DDEFL1	development and differentiation enhancing factor-like 1 (DDEFL1), mRNA.	NM_017707.2	1.29	8.36	1.55	10.78	0.81	5.52	1.01	8.35	0.21	0.12	0.26	0.17
ILMN_1686573	DEFB1	defensin, beta 1 (DEFB1), mRNA.	NM_005218.3	1.88	5.16	1.82	5.02	1.31	3.25	1.3	3.23	-0.01	0	-0.06	0.01
ILMN_2319910	DGKA	diacylglycerol kinase, alpha 80kDa (DGKA), transcript variant 4, mRNA.	NM_201554.1	1.3	5.37	0.74	2.13	1.1	6.39	0.75	3.08	-0.35	0.25	-0.56	0.51
ILMN_2319913	DGKA	diacylglycerol kinase, alpha 80kDa (DGKA), transcript variant 4, mRNA.	NM_201554.1	1.38	7.61	0.62	2.08	1.09	6.18	0.64	2.19	-0.45	0.48	-0.76	1.82
ILMN_1752478	DHRS3	dehydrogenase/reductase (SDR family) member 3 (DHRS3), mRNA.	NM_004753.4	1.28	9.57	0.79	4.74	1.08	8.45	0.84	5.3	-0.24	0.16	-0.5	1.12
ILMN_1763605	DIDO1	death inducer-obliterator 1 (DIDO1), transcript variant 3, mRNA.	NM_080797.2	1.18	7.71	2.41	17.97	0.66	3.79	2.17	28.07	1.51	13.93	1.23	6.6
ILMN_2404182	DUOX1	dual oxidase 1 (DUOX1), transcript variant 1, mRNA.	NM_017434.3	1.11	4.2	0.82	2.59	0.88	4.53	1.09	6.75	0.21	0.08	-0.29	0.11
ILMN_1690289	DUOX1	dual oxidase 1 (DUOX1), transcript variant 1, mRNA.	NM_017434.3	1.43	7	1.31	6.32	1.01	8.65	1.07	9.58	0.06	0.01	-0.11	0.03
ILMN_1710622	DUOXA1	dual oxidase maturation factor 1 (DUOXA1), mRNA.	NM_144565.2	1.43	10.93	1.11	7.79	1.04	10.68	0.81	6.8	-0.24	0.22	-0.33	0.36
ILMN_1745623	EFCAB4A	EF-hand calcium binding domain 4A (EFCAB4A), mRNA.	NM_173584.3	3.01	18.79	2.03	12.51	1.38	13.63	1.4	13.89	0.01	0	-0.98	3.11
ILMN_1764873	ELAVL1	ELAV (embryonic lethal, abnormal vision, Drosophila)-like 1 (Hu antigen R) (ELAVL1), mRNA.	NM_001419.2	0.05	0.06	1.44	12.95	0.11	0.16	1.69	24.75	1.58	19.48	1.39	10.55
ILMN_1672022	EPHA4	EPH receptor A4 (EPHA4), mRNA.	NM_004438.3	1.05	8.27	0.38	1.55	1.26	8.55	0.33	0.63	-0.93	3.39	-0.67	2.95
ILMN_1709237	EPHX2	epoxide hydrolase 2, cytoplasmic (EPHX2), mRNA.	NM_001979.4	1.07	5.34	0.92	4.3	1.49	10.03	1.27	7.55	-0.22	0.08	-0.15	0.05
ILMN_2148012	EPR1	effector cell peptidase receptor 1 (EPR1) on chromosome 17.	NR_002219.1	1.47	4.9	1.59	5.66	1.08	5.59	1.15	6.26	0.07	0.01	0.12	0.02
ILMN_1737993	ERBB3	v-erb-b2 erythroblastic leukemia viral oncogene homolog 3 (avian) (ERBB3), transcript variant s, mRNA.	NM_001005915.1	0.89	3.76	1.89	11.6	1.11	7.45	1.38	10.95	0.27	0.16	1	3.34
ILMN_1751346	ERBB3	v-erb-b2 erythroblastic leukemia viral oncogene homolog 3 (avian) (ERBB3), transcript variant 1, mRNA.	NM_001982.2	1.28	4.6	1.42	5.57	1.15	7.27	0.96	5.14	-0.2	0.07	0.14	0.03
ILMN_1808011	FAM46B	family with sequence similarity 46, member B (FAM46B), mRNA.	NM_052943.2	1	6.22	1.57	11.77	0.58	3.6	1.31	15.4	0.73	3.93	0.58	1.47
ILMN_1704571	FAM53B	family with sequence similarity 53, member B (FAM53B), mRNA.	NM_014661.3	1.67	5.89	1.91	7.33	0.75	4.02	1.1	8.18	0.35	0.35	0.24	0.06
ILMN_1755721	FAM63A	family with sequence similarity 63, member A (FAM63A), transcript variant 1, mRNA.	NM_018379.3	1.55	6.92	1.71	8.12	1.55	11.57	1.53	11.32	-0.02	0	0.16	0.04
ILMN_1728799	FBP1	fructose-1,6-bisphosphatase 1 (FBP1), mRNA.	NM_000507.2	1.33	9.48	1.62	12.29	1.39	15.23	1.02	9.05	-0.37	0.58	0.29	0.25
ILMN_1705302	FCGRT	Fc fragment of IgG, receptor, transporter, alpha (FCGRT), mRNA.	NM_004107.3	1.18	5.75	1.24	6.39	1.09	9.58	0.86	6.34	-0.22	0.15	0.07	0.01
ILMN_1700098	FLJ22531	PREDICTED: hypothetical protein FLJ22531, transcript variant 5 (FLJ22531), mRNA.	XM_945497.1	0.67	3.17	1.13	7.58	0.75	4.51	1.13	9.64	0.39	0.53	0.47	0.82
ILMN_2150802	FLJ22795	hypothetical protein FLJ22795 (FLJ22795), mRNA.	NM_025084.1	1.28	9.09	1.11	7.52	1.52	15.8	1.37	13.44	-0.15	0.06	-0.17	0.09
ILMN_1691966	FLJ35934	FLJ35934 protein (FLJ35934), mRNA.	NM_207453.1	1.18	7.4	1.34	9.02	1.36	14.59	1.09	10.01	-0.27	0.26	0.17	0.07
ILMN_1795300	FLJ41603	FLJ41603 protein (FLJ41603), mRNA.	NM_001001669.2	1.21	9.84	1.23	10.12	0.81	9.68	1	14.03	0.2	0.23	0.02	0
ILMN_2173524	FOXD4	forkhead box D4 (FOXD4), mRNA.	NM_207305.2	0.14	0.15	1.3	7.37	-0.21	0.53	1.19	14.71	1.41	16.21	1.16	4.76
ILMN_1781867	FOXD4L1	forkhead box D4-like 1 (FOXD4L1), mRNA.	NM_012184.4	-0.04	0.04	1.65	13.49	-0.15	0.38	1.23	19.15	1.38	19.68	1.68	11.77
ILMN_2085441	FOXD4L1	forkhead box D4-like 1 (FOXD4L1), mRNA.	NM_012184.3	-0.03	0.03	1.62	13.37	0.02	0.02	1.78	20.37	1.76	17.09	1.65	11.63
ILMN_1712095	FOXO4	forkhead box O4 (FOXO4), mRNA.	NM_005938.2	1.23	5.02	1.54	7.25	1.3	6.89	1.16	5.59	-0.14	0.03	0.31	0.14
ILMN_1791580	FXYD3	FXYD domain containing ion transport regulator 3 (FXYD3), transcript variant 1, mRNA.	NM_005971.2	1.61	11.42	1.53	10.79	1.4	13.7	1.29	12.09	-0.1	0.03	-0.07	0.02
ILMN_1665372	FXYD3	FXYD domain containing ion transport regulator 3 (FXYD3), transcript variant 2, mRNA.	NM_021910.1	1.75	7.07	2.35	10.64	1.57	12.79	1.43	10.96	-0.14	0.04	0.59	0.44
ILMN_1796537	FYB	FYN binding protein (FYB-120/130) (FYB), transcript variant 1, mRNA.	NM_001465.3	1.5	2.74	1.17	1.82	1.13	2.82	0.73	1.16	-0.4	0.12	-0.33	0.06
ILMN_2324202	GABRE	gamma-aminobutyric acid (GABA) A receptor, epsilon (GABRE), transcript variant 1, mRNA.	NM_004961.3	1.84	8.31	1.07	3.67	1.36	6.73	1.31	6.26	-0.05	0.01	-0.77	1.04
ILMN_1784706	GABRE	gamma-aminobutyric acid (GABA) A receptor, epsilon (GABRE), transcript variant 1, mRNA.	NM_004961.3	1.66	8.52	0.9	3.33	1.32	5.13	1.2	4.28	-0.12	0.02	-0.76	1.41
ILMN_2102670	GATA2	GATA binding protein 2 (GATA2), mRNA.	NM_032638.3	2	12.59	1.84	11.45	0.68	4.32	1.02	9.13	0.34	0.47	-0.16	0.05
ILMN_1699631	GATS	opposite strand transcription unit to STAG3 (GATS), mRNA.	NM_178831.4	0.79	4.14	1.25	8.56	1.19	7.44	1.28	8.51	0.09	0.02	0.46	0.77
ILMN_1774077	GBP2	guanylate binding protein 2, interferon-inducible (GBP2), mRNA.	NM_004120.3	2.95	13.01	2.9	12.82	2.79	19.17	2.63	17.56	-0.17	0.03	-0.04	0.01
ILMN_1694780	GCHFR	GTP cyclohydrolase I feedback regulator (GCHFR), mRNA.	NM_005258.2	1.87	8.38	1.78	7.97	1.34	11.21	1.02	6.99	-0.32	0.26	-0.08	0.02
ILMN_1737308	GLRX	glutaredoxin (thioltransferase) (GLRX), mRNA.	NM_002064.1	1.08	3.6	0.7	1.71	1.13	3.95	0.76	1.77	-0.38	0.15	-0.39	0.18
ILMN_2384056	GPER	G protein-coupled estrogen receptor 1 (GPER), transcript variant 3, mRNA.	NM_001039966.1	1.5	11.06	1.04	6.75	1.71	14.25	0.87	4.27	-0.84	2.67	-0.46	0.81
ILMN_1795298	GPER	G protein-coupled estrogen receptor 1 (GPER), transcript variant 3, mRNA.	NM_001039966.1	1.34	11.01	0.83	5.65	1.26	9.29	0.5	1.6	-0.76	2.34	-0.51	1.43
ILMN_2407389	GPNMB	glycoprotein (transmembrane) nmb (GPNMB), transcript variant 2, mRNA.	NM_002510.2	1.27	6.45	0.91	3.84	1.32	8.86	1.12	6.6	-0.2	0.07	-0.37	0.26
ILMN_1782944	GPR37L1	G protein-coupled receptor 37 like 1 (GPR37L1), mRNA.	NM_004767.3	1.25	9.1	0.86	5.34	1.46	11.99	0.88	4.88	-0.58	1.14	-0.39	0.57
ILMN_1682599	GPRC5A	G protein-coupled receptor, family C, group 5, member A (GPRC5A), mRNA.	NM_003979.3	1.55	11.86	0.67	3.53	1.02	9.32	0.49	2.36	-0.53	1.61	-0.88	3.94
ILMN_2133205	GPX2	glutathione peroxidase 2 (gastrointestinal) (GPX2), mRNA.	NM_002083.2	1.01	6.04	1.21	8.04	1.02	11.22	0.77	6.77	-0.25	0.3	0.2	0.11
ILMN_1723706	GRAMD4	GRAM domain containing 4 (GRAMD4), mRNA.	NM_015124.2	1.12	7.7	1.06	7.3	0.83	8.71	1.05	12.88	0.21	0.22	-0.05	0.02
ILMN_1801043	GSN	gelsolin (amyloidosis, Finnish type) (GSN), transcript variant 2, mRNA.	NM_198252.2	2.38	11.45	2.15	10.07	1.29	12.35	1.37	13.66	0.08	0.02	-0.24	0.07
ILMN_1787518	GSN	gelsolin (amyloidosis, Finnish type) (GSN), transcript variant 1, mRNA.	NM_000177.3	1.87	7.88	1.56	6.16	1.33	11.36	1.67	16.53	0.34	0.32	-0.31	0.1
ILMN_2201580	GSTM2	glutathione S-transferase M2 (muscle) (GSTM2), mRNA.	NM_000848.2	1.15	7.2	1.62	11.49	1.01	7.75	1.38	13.22	0.37	0.46	0.47	0.73
ILMN_2211728	GUCA1B	guanylate cyclase activator 1B (retina) (GUCA1B), mRNA.	NM_002098.3	-0.23	0.57	1.17	9.42	-0.48	2.43	1.01	10.04	1.49	16.1	1.41	10
ILMN_1708728	H2AFJ	H2A histone family, member J (H2AFJ), mRNA.	NM_177925.2	1.31	7.07	1.26	6.84	1.07	9.8	1.01	8.8	-0.06	0.02	-0.05	0.01
ILMN_2318568	HCFC1R1	host cell factor C1 regulator 1 (XPO1 dependent) (HCFC1R1), transcript variant 3, mRNA.	NM_001002018.1	1.08	6.29	1.08	6.37	1.57	18.17	1.56	18.16	-0.01	0	-0.01	0
ILMN_1710284	HES1	hairy and enhancer of split 1, (Drosophila) (HES1), mRNA.	NM_005524.2	0.58	1.64	2.65	16.23	1.34	15.75	1.88	26.16	0.54	1.9	2.07	10.49
ILMN_2094266	HES2	hairy and enhancer of split 2 (Drosophila) (HES2), mRNA.	NM_019089.3	1.75	13.08	1.26	8.68	1.19	16.51	1.16	15.83	-0.03	0.01	-0.49	0.92
ILMN_1794742	HES5	hairy and enhancer of split 5 (Drosophila) (HES5), mRNA.	NM_001010926.2	1.34	4.47	0.94	2.5	1.07	11.1	0.63	4.28	-0.44	1.12	-0.4	0.16
ILMN_1652762	HIC2	hypermethylated in cancer 2 (HIC2), mRNA.	NM_015094.2	-0.1	0.14	1.37	10.89	0.73	6.38	1.39	19.06	0.66	3.77	1.48	10
ILMN_1757406	HIST1H1C	histone cluster 1, H1c (HIST1H1C), mRNA.	NM_005319.3	1.03	4.95	1.1	5.6	1.49	10.71	1.23	7.61	-0.27	0.13	0.07	0.02
ILMN_1756849	HIST1H2AE	histone cluster 1, H2ae (HIST1H2AE), mRNA.	NM_021052.2	1.3	4.22	2.02	8.44	0.95	8.65	1.45	17.49	0.5	1.47	0.72	0.68
ILMN_1686478	HIST1H2AG	histone cluster 1, H2ag (HIST1H2AG), mRNA.	NM_021064.3	0.9	2.62	1.3	5.06	1.38	10.85	1.78	16.52	0.4	0.41	0.4	0.2
ILMN_1651496	HIST1H2BD	histone cluster 1, H2bd (HIST1H2BD), transcript variant 2, mRNA.	NM_138720.1	1.17	5.57	1.19	5.83	1.57	13.59	1.35	10.6	-0.22	0.1	0.02	0
ILMN_1758623	HIST1H2BD	histone cluster 1, H2bd (HIST1H2BD), transcript variant 2, mRNA.	NM_138720.1	1.71	7.12	1.78	7.7	1.84	14.69	1.64	12.11	-0.21	0.07	0.08	0.01
ILMN_1716195	HIST1H2BG	histone cluster 1, H2bg (HIST1H2BG), mRNA.	NM_003518.3	0.19	0.22	1.11	5.11	0.68	4.03	1.22	11.48	0.53	1.42	0.91	2.47
ILMN_1749368	HIST1H3H	histone cluster 1, H3h (HIST1H3H), mRNA.	NM_003536.2	1.21	6.2	1.99	12.34	1.2	11.22	1.82	21.85	0.62	2.13	0.78	1.9
ILMN_1681542	HIST1H4E	histone cluster 1, H4e (HIST1H4E), mRNA.	NM_003545.3	0.04	0.02	1.01	3.22	0.44	0.99	1.27	8.24	0.84	2.46	0.98	1.84
ILMN_1659047	HIST2H2AA3	histone cluster 2, H2aa3 (HIST2H2AA3), mRNA.	NM_003516.2	1.71	8.47	1.81	9.27	1.9	19.03	1.87	18.75	-0.03	0	0.1	0.02
ILMN_2144426	HIST2H2AA3	histone cluster 2, H2aa3 (HIST2H2AA3), mRNA.	NM_003516.2	1.45	12.02	1.53	12.91	1.6	19.32	1.5	17.57	-0.1	0.04	0.09	0.03
ILMN_1732071	HIST2H2BE	histone cluster 2, H2be (HIST2H2BE), mRNA.	NM_003528.2	1.13	5.87	0.89	4.11	1.41	11.14	1.28	9.54	-0.12	0.04	-0.24	0.11
ILMN_2186806	HLA-F	major histocompatibility complex, class I, F (HLA-F), mRNA.	NM_018950.1	1.02	6.12	0.8	4.29	1.01	8.81	1.24	12.55	0.23	0.17	-0.22	0.12
ILMN_2166457	HPGD	hydroxyprostaglandin dehydrogenase 15-(NAD) (HPGD), mRNA.	NM_000860.3	1.15	4.82	1.63	8.32	1.27	11.36	1.35	12.69	0.08	0.02	0.48	0.4
ILMN_2193706	HRK	harakiri, BCL2 interacting protein (contains only BH3 domain) (HRK), mRNA.	NM_003806.1	1.36	10.71	0.82	5.23	1.17	10.91	1.23	11.95	0.06	0.02	-0.54	1.52
ILMN_1863284		K-EST0218892 L18POOL1n1 cDNA clone L18POOL1n1-30-G08 5, mRNA sequence		0.9	6.94	1.05	8.85	1.13	11.96	1.16	12.64	0.04	0.01	0.16	0.1
ILMN_1904401		BX109999 Soares_fetal_liver_spleen_1NFLS_S1 cDNA clone IMAGp998G05975, mRNA sequence		0.11	0.08	1.32	5.12	0.12	0.15	1.73	19.6	1.61	14.83	1.21	3.1
ILMN_1852793		cDNA clone IMAGE:30332316		0.3	1.09	1.81	17.34	0.15	0.31	1.6	24.55	1.45	18.32	1.51	12.32
ILMN_1857335		cDNA FLJ35432 fis, clone SMINT2002311		1.81	11.42	2.09	13.52	1.51	15.49	1.51	15.55	0	0	0.28	0.16
ILMN_1868866		PREDICTED: hypothetical LOC126435 (LOC126435), mRNA		1	5.97	1.37	9.53	1.09	8.82	0.85	5.57	-0.24	0.16	0.37	0.42
ILMN_1856480		cDNA clone IMAGE:5263177		1.01	4.98	1.54	9.4	0.9	5.14	1.35	10.81	0.46	0.63	0.53	0.76
ILMN_1907947		mRNA; cDNA DKFZp686I14117 (from clone DKFZp686I14117)		0.11	0.15	1.37	10.46	0.39	1.61	1.45	18.16	1.06	8.66	1.25	7.61
ILMN_1878029		cDNA FLJ34585 fis, clone KIDNE2008758		1.01	5.24	1.43	9.02	0.64	3.59	1.24	11.96	0.6	1.95	0.43	0.49
ILMN_1863962		BX116033 NCI_CGAP_Lu24 cDNA clone IMAGp998A155622, mRNA sequence		1.64	11.57	1.63	11.5	2.06	13.65	1.49	7.84	-0.57	0.54	-0.01	0
ILMN_1886963		nw44h12.s1 NCI_CGAP_Ew1 cDNA clone IMAGE:1249511, mRNA sequence		0.11	0.19	1.33	11.99	0.18	0.48	1.69	28.22	1.5	20.83	1.22	8.87
ILMN_1887008		BX105017 Soares_fetal_heart_NbHH19W cDNA clone IMAGp998A20842, mRNA sequence		-0.1	0.1	1.22	6.53	0.12	0.17	1.26	13.97	1.14	9.57	1.32	5.74
ILMN_1911503		ip26b05.y1 HR85 islet cDNA clone IMAGE:6218432 5, mRNA sequence		1.19	2.99	0.71	1.23	1.37	6.83	1.21	5.45	-0.16	0.04	-0.48	0.19
ILMN_1836218		cDNA FLJ13116 fis, clone NT2RP3002659		1.11	5.19	1.4	7.55	1.59	17.63	1.7	19.57	0.11	0.04	0.29	0.15
ILMN_1871457		PREDICTED: hypothetical LOC389089 (LOC389089), mRNA		1.23	7.41	1.86	12.88	1.57	18.47	1.42	15.85	-0.15	0.07	0.63	1.49
ILMN_1908274		xn24e12.x1 NCI_CGAP_Kid11 cDNA clone IMAGE:2694670 3, mRNA sequence		0.82	2.51	2.09	10.83	0.62	3.99	1.49	18.39	0.87	5.56	1.26	3.9
ILMN_1838767		clone FP7915 unknown mRNA		1.9	13.5	1.93	13.65	2.07	27.23	1.9	24.14	-0.18	0.1	0.02	0
ILMN_1861057		hypothetical protein LOC338620, mRNA (cDNA clone IMAGE:6023208), partial cds		0.59	1.75	1.39	7.66	-0.22	0.53	0.91	8.63	1.13	10.25	0.8	2.02
ILMN_1838407		UI-1-BB1p-aul-d-04-0-UI.s1 NCI_CGAP_Pl6 cDNA clone UI-1-BB1p-aul-d-04-0-UI 3, mRNA sequence		-1.01	4.38	0.09	0.08	-0.44	1.28	0.56	2.1	1	4.78	1.1	3.73
ILMN_1817656		full-length cDNA clone CS0DE007YL10 of Placenta of (human)		-0.07	0.08	1.24	9.39	-0.18	0.6	0.85	12.2	1.04	14.16	1.3	8.24
ILMN_1857295		AGENCOURT_6414453 NIH_MGC_72 cDNA clone IMAGE:5557164 5, mRNA sequence		1	8.05	0.94	7.44	1.29	10.47	1.37	11.67	0.08	0.02	-0.06	0.02
ILMN_1881081		AV705309 ADB cDNA clone ADBBWE05 5, mRNA sequence		1.7	9.44	1.74	9.84	2.19	16.35	1.27	6.44	-0.92	2.24	0.04	0.01
ILMN_1880215		UI-H-BI1-acd-c-07-0-UI.s1 NCI_CGAP_Sub3 cDNA clone IMAGE:2713741 3, mRNA sequence		1.28	5.32	1.55	7.28	1.41	6.4	1.56	7.7	0.15	0.03	0.27	0.1
ILMN_1720710	HSPB3	heat shock 27kDa protein 3 (HSPB3), mRNA.	NM_006308.1	2.01	13.12	1.1	5.89	1.81	21.98	1.58	17.96	-0.23	0.16	-0.91	2.99
ILMN_1726678	HSPC047	HSPC047 protein (HSPC047), mRNA.	NM_014147.1	1.93	13.87	1.05	6.26	0.94	8.02	1.07	10.19	0.14	0.06	-0.88	3.34
ILMN_1665832	ID1	inhibitor of DNA binding 1, dominant negative helix-loop-helix protein (ID1), transcript variant 2, mRNA.	NM_181353.1	1.66	5.56	1.13	3.05	2.38	27.23	1.92	20.03	-0.46	0.72	-0.52	0.25
ILMN_1732296	ID3	inhibitor of DNA binding 3, dominant negative helix-loop-helix protein (ID3), mRNA.	NM_002167.2	1.3	7.51	1.06	5.64	2.25	30.89	1.3	13.77	-0.95	6.21	-0.24	0.12
ILMN_1745374	IFI35	interferon-induced protein 35 (IFI35), mRNA.	NM_005533.2	1.05	4.45	1.42	7.33	1.08	11.99	1.13	13.01	0.05	0.01	0.38	0.25
ILMN_1801246	IFITM1	interferon induced transmembrane protein 1 (9-27) (IFITM1), mRNA.	NM_003641.3	1.48	9.44	1.8	12.26	1.51	19.93	1.27	15.27	-0.24	0.24	0.32	0.25
ILMN_1725193	IGFBP2	insulin-like growth factor binding protein 2, 36kDa (IGFBP2), mRNA.	NM_000597.2	1.01	5.43	1.16	6.86	1.06	7.46	0.92	5.67	-0.15	0.05	0.15	0.06
ILMN_1683328	IHPK2	inositol hexaphosphate kinase 2 (IHPK2), transcript variant 3, mRNA.	NM_001005910.1	0.82	3.69	1.26	7.4	1.17	12.75	1.15	12.58	-0.01	0	0.44	0.49
ILMN_2328835	IHPK2	inositol hexaphosphate kinase 2 (IHPK2), transcript variant 1, mRNA.	NM_016291.2	0.85	2.78	1.24	5.41	0.81	5.02	1.35	12.53	0.54	1.29	0.39	0.23
ILMN_1724181	IL15	interleukin 15 (IL15), transcript variant 3, mRNA.	NM_000585.2	0.82	4.72	1.21	8.63	1.62	14.27	1.42	11.5	-0.2	0.08	0.39	0.54
ILMN_1809141	ING4	inhibitor of growth family, member 4 (ING4), mRNA.	NM_016162.2	1.04	6.99	1.01	6.78	0.92	7.23	1.09	9.86	0.18	0.09	-0.03	0.01
ILMN_1747934	ISYNA1	myo-inositol 1-phosphate synthase A1 (ISYNA1), mRNA.	NM_016368.3	1.16	6.07	1.26	6.97	1.15	9.17	1.32	11.6	0.17	0.07	0.1	0.03
ILMN_1700817	KIAA0774	KIAA0774 (KIAA0774), transcript variant 1, mRNA.	NM_001033602.2	1.14	6.83	1.24	7.82	1.58	13.81	1.38	10.98	-0.2	0.09	0.1	0.03
ILMN_1677347	KIAA0774	KIAA0774 (KIAA0774), transcript variant 2, mRNA.	NM_015233.5	0.98	3.74	1.43	7.03	1.89	14.81	1.45	9.48	-0.44	0.39	0.45	0.36
ILMN_2289093	KIAA1618	KIAA1618 (KIAA1618), mRNA.	NM_020954.2	1.35	10.07	1.59	12.39	0.74	5.96	1.53	20.37	0.79	5	0.23	0.16
ILMN_1735930	KLF2	Kruppel-like factor 2 (lung) (KLF2), mRNA.	NM_016270.2	0.65	2	1.3	6.7	0.47	1.64	1.43	13.53	0.96	5.07	0.65	1.12
ILMN_1735014	KLF6	Kruppel-like factor 6 (KLF6), transcript variant 2, mRNA.	NM_001300.4	0.68	1.34	1.17	3.77	0.93	8.21	1.57	19.47	0.63	2.68	0.49	0.27
ILMN_1701918	KLHDC9	kelch domain containing 9 (KLHDC9), transcript variant 3, mRNA.	NM_001007256.1	1.28	7.07	1.52	9.11	1.15	10.65	1.02	8.69	-0.13	0.05	0.24	0.11
ILMN_1688205	KLK10	kallikrein-related peptidase 10 (KLK10), transcript variant 1, mRNA.	NM_002776.4	1.45	7.9	1.44	7.91	1.08	13.16	1.19	15.43	0.11	0.05	-0.01	0
ILMN_1695924	KLK11	kallikrein-related peptidase 11 (KLK11), transcript variant 2, mRNA.	NM_144947.1	1.69	17.13	1.64	16.51	1.58	22.8	1.52	21.56	-0.06	0.02	-0.05	0.02
ILMN_1745570	KLK7	kallikrein-related peptidase 7 (KLK7), transcript variant 1, mRNA.	NM_005046.2	1.96	12.87	1.93	12.63	1.91	24.59	2.05	27.14	0.14	0.06	-0.04	0.01
ILMN_1735700	KLK8	kallikrein-related peptidase 8 (KLK8), transcript variant 1, mRNA.	NM_007196.2	1.15	5.33	1.53	8.34	1.21	13.74	1.21	13.84	0	0	0.38	0.27
ILMN_1716093	KRT10	keratin 10 (epidermolytic hyperkeratosis; keratosis palmaris et plantaris) (KRT10), mRNA.	NM_000421.2	2.35	15.55	2.29	15.16	1.91	25.12	1.91	25.09	0	0	-0.06	0.01
ILMN_1721218	KRT13	keratin 13 (KRT13), transcript variant 2, mRNA.	NM_002274.3	2.1	12.93	2.05	12.6	1.63	20.01	1.73	21.95	0.1	0.04	-0.05	0.01
ILMN_1770612	KRT15	keratin 15 (KRT15), mRNA.	NM_002275.2	2.2	10.91	2.28	11.41	1.96	28.73	1.96	28.8	0	0	0.07	0.01
ILMN_1695621	KRT3	keratin 3 (KRT3), mRNA.	NM_057088.2	1.35	8.36	1.53	9.98	1.28	15.39	1.42	18.24	0.14	0.07	0.18	0.07
ILMN_1721354	KRT6B	keratin 6B (KRT6B), mRNA.	NM_005555.3	0.95	5.87	1.11	7.48	1.15	10.41	1.39	14.26	0.24	0.17	0.15	0.07
ILMN_1752968	LAMB2	laminin, beta 2 (laminin S) (LAMB2), mRNA.	NM_002292.3	1.52	5.48	1.55	5.74	1.47	11.53	1.33	9.78	-0.14	0.04	0.03	0
ILMN_1660317	LEFTY1	left-right determination factor 1 (LEFTY1), mRNA.	NM_020997.2	1.76	11.32	1.23	7.02	0.48	3.1	1.22	16.58	0.74	5.28	-0.53	0.81
ILMN_1785444	LEMD1	LEM domain containing 1 (LEMD1), mRNA.	NM_001001552.3	2.4	10.31	1.76	6.81	1.96	18.56	1.57	13.06	-0.39	0.38	-0.64	0.48
ILMN_1661708	LGALS7	lectin, galactoside-binding, soluble, 7 (galectin 7) (LGALS7), mRNA.	NM_002307.1	1.79	14.04	1.44	10.8	1.46	15.17	1.34	13.18	-0.12	0.04	-0.35	0.42
ILMN_1660624	LIMK2	LIM domain kinase 2 (LIMK2), transcript variant 1, mRNA.	NM_001031801.1	1.8	14.41	1.95	15.75	2.24	23.94	2.3	24.94	0.07	0.01	0.15	0.08
ILMN_2235851	LINCR	likely ortholog of mouse lung-inducible Neutralized-related C3HC4 RING domain protein (LINCR), mRNA.	NM_001080535.1	1.39	9.36	1.56	10.86	1.04	7.89	0.95	6.7	-0.09	0.02	0.16	0.07
ILMN_1668194	LMTK3	PREDICTED: lemur tyrosine kinase 3 (LMTK3), mRNA.	XM_936372.2	1.26	9.14	1.16	8.27	1.54	14.61	1.43	12.95	-0.11	0.03	-0.1	0.04
ILMN_1803889	LOC146439	PREDICTED: hypothetical LOC146439 (LOC146439), mRNA.	XM_085463.7	1.62	10.7	1.66	11.14	1.05	4.55	1.24	6.23	0.19	0.05	0.05	0.01
ILMN_1703316	LOC255783	hypothetical protein LOC255783 (LOC255783) on chromosome 19.	NR_002797.1	1.31	9.86	1.66	13.26	1.13	9.55	1.16	9.94	0.03	0.01	0.35	0.45
ILMN_2170625	LOC389286	similar to FKSG62 (LOC389286), mRNA.	NM_001018022.1	0.88	2.14	1.34	4.58	1.17	2.65	0.88	1.5	-0.29	0.06	0.46	0.22
ILMN_1770994	LOC440900	PREDICTED: hypothetical LOC440900 (LOC440900), mRNA.	XM_498909.3	-0.14	0.25	1.08	8.32	-0.07	0.08	1.22	13.29	1.29	12.16	1.22	8.04
ILMN_1765032	LOC440993	hypothetical gene supported by AK128346 (LOC440993), mRNA.	NM_001013714.1	1.63	14.31	1.94	16.99	1.44	16.36	1.63	19.79	0.18	0.11	0.31	0.39
ILMN_1743755	LOC441150	PREDICTED: similar to RIKEN cDNA 2310039H08 (LOC441150), mRNA.	XM_001134411.1	1.66	10.01	2.14	13.65	1.27	11.95	1.74	19.94	0.47	0.99	0.48	0.55
ILMN_1743943	LOC441737	PREDICTED: similar to hect domain and RLD 2 (LOC441737), mRNA.	XM_497474.2	-0.26	0.48	1.44	9.66	0.12	0.13	1.89	19.92	1.77	15.31	1.7	10
ILMN_1770818	LOC642342	PREDICTED: similar to Contactin-associated protein-like 3 precursor (Cell recognition molecule Caspr3) (LOC642342), mRNA.	XM_925876.1	0.8	1.91	1.91	8.36	0.8	2.93	1.11	5.49	0.3	0.15	1.12	2.39
ILMN_1743078	LOC643031	PREDICTED: similar to NADH dehydrogenase subunit 5 (LOC643031), mRNA.	XM_926402.1	1.6	8.74	2.12	12.63	1.15	6.38	1.24	7.34	0.09	0.02	0.52	0.58
ILMN_1692956	LOC643949	PREDICTED: similar to 60S acidic ribosomal protein P2 (LOC643949), mRNA.	XR_018645.1	0.81	2.74	1.1	4.72	1.33	10.82	1.39	11.62	0.06	0.01	0.28	0.12
ILMN_1661743	LOC644760	PREDICTED: hypothetical protein LOC644760 (LOC644760), mRNA.	XM_932354.1	1.2	5.6	0.88	3.47	1.76	10.56	1.2	5.33	-0.56	0.51	-0.32	0.17
ILMN_1661078	LOC644844	PREDICTED: hypothetical LOC644844 (LOC644844), mRNA.	XM_927939.2	2.85	13.13	2.73	12.56	1.95	18.75	1.87	17.65	-0.08	0.02	-0.12	0.02
ILMN_1737991	LOC650298	PREDICTED: similar to 40S ribosomal protein S26 (LOC650298), mRNA.	XM_939387.1	0.92	5.52	1.13	7.61	0.91	8.74	1.12	12.34	0.2	0.16	0.21	0.12
ILMN_1657348	LOC650909	PREDICTED: similar to activating signal cointegrator 1 complex subunit 3-like 1 (LOC650909), mRNA.	XM_939995.2	1.75	6.04	1.96	7.29	0.95	6.69	1.08	8.44	0.13	0.05	0.21	0.04
ILMN_1709948	LOC651453	PREDICTED: similar to ribosomal protein L36 (LOC651453), mRNA.	XM_940610.1	0.87	2.46	1.03	3.48	1.43	9.75	1.56	11.4	0.14	0.04	0.16	0.04
ILMN_1736316	LOC652767	PREDICTED: hypothetical LOC652767 (LOC652767), mRNA.	XM_942408.1	1.1	6.41	1.27	8.02	1.19	9.31	0.83	4.82	-0.36	0.38	0.17	0.07
ILMN_1722032	LOC653060	PREDICTED: similar to Contactin-associated protein-like 3 precursor (Cell recognition molecule Caspr3) (LOC653060), mRNA.	XM_925779.1	0.24	0.78	1.22	12.18	0.47	1.47	1.04	7.06	0.57	1.23	0.99	7.53
ILMN_1655949	LOC653107	PREDICTED: similar to Annexin A8 (Annexin VIII) (Vascular anticoagulant-beta) (VAC-beta), transcript variant 5 (LOC653107), mRNA.	XM_931353.1	1.81	7.43	1.82	7.61	1.47	9.33	0.8	2.98	-0.67	1.15	0.01	0
ILMN_1695435	LOC653610	PREDICTED: similar to Histone H2A.o (H2A/o) (H2A.2) (H2a-615) (LOC653610), mRNA.	XM_928387.1	1.03	5.8	1.08	6.45	0.87	6.81	1.07	9.99	0.21	0.14	0.06	0.02
ILMN_1668027	LOC727762	PREDICTED: similar to NADH dehydrogenase (ubiquinone) 1 beta subcomplex, 4, 15kDa, transcript variant 1 (LOC727762), mRNA.	XM_001125898.1	0.29	0.52	1.56	9.84	0.19	0.38	1.54	19.42	1.35	13.3	1.27	5.86
ILMN_1658569	LOC728910	PREDICTED: similar to Galectin-7 (Gal-7) (HKL-14) (PI7) (p53-induced protein 1) (LOC728910), mRNA.	XM_001128786.1	2	14.34	1.79	12.64	1.35	13.85	1.27	12.63	-0.08	0.02	-0.21	0.11
ILMN_1704014	LOC730256	PREDICTED: hypothetical protein LOC730256 (LOC730256), mRNA.	XM_001134398.1	1.45	8.37	1.12	5.85	1.44	14.92	0.99	7.84	-0.45	0.89	-0.33	0.22
ILMN_2157075	LRCH4	leucine-rich repeats and calponin homology (CH) domain containing 4 (LRCH4), mRNA.	NM_002319.3	0.66	2.31	1.03	5.15	0.78	6.74	1.01	10.64	0.23	0.22	0.37	0.3
ILMN_1739605	LYPD3	LY6/PLAUR domain containing 3 (LYPD3), mRNA.	NM_014400.2	1.22	10.08	0.89	6.56	1.11	13.74	1	11.64	-0.11	0.05	-0.33	0.48
ILMN_1719543	MAF	v-maf musculoaponeurotic fibrosarcoma oncogene homolog (avian) (MAF), transcript variant 1, mRNA.	NM_005360.3	1.59	10.72	1.05	6.02	1.26	7.25	0.68	2.26	-0.57	0.76	-0.55	1.02
ILMN_1730202	MAGEF1	melanoma antigen family F, 1 (MAGEF1), mRNA.	NM_022149.4	1.14	4.59	0.83	2.75	1.14	12.72	0.64	4.56	-0.5	1.66	-0.31	0.14
ILMN_2320330	MAL	mal, T-cell differentiation protein (MAL), transcript variant a, mRNA.	NM_002371.2	2.75	11.6	3.02	12.98	3.4	24.91	3.15	22.33	-0.25	0.06	0.27	0.07
ILMN_1663640	MAOA	monoamine oxidase A (MAOA), nuclear gene encoding mitochondrial protein, mRNA.	NM_000240.2	1.14	5.71	1.2	6.32	1.23	11.08	1.12	9.49	-0.11	0.03	0.06	0.01
ILMN_1724064	MGC27348	PREDICTED: similar to ribosomal protein S2; 40S ribosomal protein S2 (MGC27348), mRNA.	XM_171158.5	0.02	0.02	1.22	9.69	-0.12	0.19	1.34	17.06	1.46	16.55	1.2	7.72
ILMN_1814106	MGC59937	Similar to RIKEN cDNA 2310002J15 gene (MGC59937), mRNA.	NM_199001.1	1.52	11.79	1.1	7.7	1.25	16.89	1.06	12.9	-0.19	0.17	-0.42	0.71
ILMN_2073758	MMP12	matrix metallopeptidase 12 (macrophage elastase) (MMP12), mRNA.	NM_002426.2	2.44	12.31	2.32	11.57	3.19	17.06	2.58	12.13	-0.61	0.3	-0.13	0.03
ILMN_1768035	MMP12	matrix metallopeptidase 12 (macrophage elastase) (MMP12), mRNA.	NM_002426.2	1.32	2.91	1.24	2.72	2.06	8.11	1.74	5.99	-0.31	0.07	-0.08	0.01
ILMN_1663873	MMP13	matrix metallopeptidase 13 (collagenase 3) (MMP13), mRNA.	NM_002427.2	1.45	5.62	1.21	4.33	1.22	4.42	0.74	1.61	-0.49	0.27	-0.24	0.07
ILMN_1791508	MMP28	matrix metallopeptidase 28 (MMP28), transcript variant 1, mRNA.	NM_024302.3	1.74	8.04	1.35	5.63	1.41	13.36	1.26	10.98	-0.16	0.06	-0.39	0.2
ILMN_1775016	MPZL2	myelin protein zero-like 2 (MPZL2), transcript variant 2, mRNA.	NM_144765.1	0.8	4.92	1.06	7.72	1.36	18.69	0.82	8.17	-0.53	2.36	0.26	0.23
ILMN_1730007	MPZL2	myelin protein zero-like 2 (MPZL2), transcript variant 2, mRNA.	NM_144765.1	0.87	3.62	1.06	5.25	1.1	9.14	0.78	4.88	-0.32	0.33	0.2	0.08
ILMN_1707464	MST1	macrophage stimulating 1 (hepatocyte growth factor-like) (MST1), mRNA.	NM_020998.2	1.42	7.77	1.89	11.48	1.71	17.78	1.7	17.66	-0.01	0	0.47	0.49
ILMN_2124802	MT1H	metallothionein 1H (MT1H), mRNA.	NM_005951.2	0.72	2.45	1.19	5.87	1.09	7	0.95	5.51	-0.13	0.04	0.47	0.46
ILMN_2371911	MUC1	mucin 1, cell surface associated (MUC1), transcript variant 5, mRNA.	NM_001044390.1	1.21	4.94	1.44	6.62	0.92	6.45	1.26	11.23	0.34	0.37	0.23	0.08
ILMN_1756992	MUC1	mucin 1, cell surface associated (MUC1), transcript variant 6, mRNA.	NM_001044391.1	1.54	9.99	1.8	12.19	1.05	11.71	1.19	14.55	0.14	0.08	0.25	0.14
ILMN_2125346	MUC16	mucin 16, cell surface associated (MUC16), mRNA.	NM_024690.2	2.38	14.34	2.29	13.66	2.68	26.13	2.54	24.33	-0.14	0.04	-0.09	0.02
ILMN_1803277	MVP	major vault protein (MVP), transcript variant 2, mRNA.	NM_005115.3	1.81	7.55	1.97	8.63	1.25	10.73	0.97	6.84	-0.28	0.22	0.16	0.04
ILMN_2181125	NAPB	N-ethylmaleimide-sensitive factor attachment protein, beta (NAPB), mRNA.	NM_022080.1	0.61	3.25	1.11	8.45	0.46	1.82	1.02	8.59	0.56	1.68	0.5	1.27
ILMN_1692169	NAT5	N-acetyltransferase 5 (NAT5), transcript variant 2, mRNA.	NM_181527.2	-0.19	0.2	0.82	2.88	-0.09	0.13	1.31	16.73	1.4	15.79	1.01	2.79
ILMN_1796642	NCF2	neutrophil cytosolic factor 2 (65kDa, chronic granulomatous disease, autosomal 2) (NCF2), mRNA.	NM_000433.2	1.16	5.05	0.94	3.66	1.57	10.53	1.31	7.62	-0.27	0.11	-0.22	0.08
ILMN_2305225	NDRG4	NDRG family member 4 (NDRG4), mRNA.	NM_022910.1	3.59	19.88	3.26	18.22	3.38	20.09	3.23	18.91	-0.14	0.02	-0.32	0.16
ILMN_1773154	NFKBIA	nuclear factor of kappa light polypeptide gene enhancer in B-cells inhibitor, alpha (NFKBIA), mRNA.	NM_020529.1	-0.35	0.59	1.05	4.5	0.62	3	1.19	10.07	0.57	1.46	1.4	5.45
ILMN_1809613	NGEF	neuronal guanine nucleotide exchange factor (NGEF), mRNA.	NM_019850.1	1.01	6.49	0.69	3.54	0.34	1	1.03	8.97	0.7	2.92	-0.33	0.35
ILMN_1807211	NICN1	nicolin 1 (NICN1), mRNA.	NM_032316.3	0.99	7.68	1.04	8.41	1.25	21.04	1.17	19.06	-0.08	0.04	0.05	0.02
ILMN_2162253	NMU	neuromedin U (NMU), mRNA.	NM_006681.1	1.18	7.79	1.38	9.79	1.05	10.53	1.17	12.64	0.12	0.05	0.2	0.11
ILMN_1729161	NOTCH1	Notch homolog 1, translocation-associated (Drosophila) (NOTCH1), mRNA.	NM_017617.3	1.64	14.8	1.23	10.59	1.24	15.76	1.31	17.38	0.08	0.03	-0.41	0.9
ILMN_1658926	NOTCH3	Notch homolog 3 (Drosophila) (NOTCH3), mRNA.	NM_000435.1	1.64	9.95	1.4	8.13	1.51	13.38	1.47	12.89	-0.04	0.01	-0.24	0.11
ILMN_1799589	NOXA1	NADPH oxidase activator 1 (NOXA1), mRNA.	NM_006647.1	1.81	9.15	1.8	9.14	1.58	18.81	1.19	11.86	-0.4	0.71	-0.02	0
ILMN_1742151	NRG2	neuregulin 2 (NRG2), transcript variant 6, mRNA.	NM_013985.1	0.7	2.86	1.24	7.4	1.56	10.53	1.33	7.99	-0.23	0.08	0.54	0.91
ILMN_1787885	NUDT18	nudix (nucleoside diphosphate linked moiety X)-type motif 18 (NUDT18), mRNA.	NM_024815.3	1.05	8.58	1.24	10.71	1.21	16	1.26	17.14	0.05	0.01	0.19	0.13
ILMN_2404688	NUPR1	nuclear protein 1 (NUPR1), transcript variant 1, mRNA.	NM_001042483.1	1.31	6.82	0.53	1.5	1.08	6.22	0.77	3.28	-0.31	0.19	-0.78	1.84
ILMN_2410826	OAS1	2',5'-oligoadenylate synthetase 1, 40/46kDa (OAS1), transcript variant 3, mRNA.	NM_001032409.1	1.18	4.39	1.84	8.75	1.61	15.44	1.09	8.02	-0.52	1	0.66	0.73
ILMN_2116877	OLFM4	olfactomedin 4 (OLFM4), mRNA.	NM_006418.3	2.19	9.84	2.17	9.76	3.23	25.99	2.86	21.9	-0.37	0.17	-0.03	0
ILMN_1722426	OR7D2	olfactory receptor, family 7, subfamily D, member 2 (OR7D2), mRNA.	NM_175883.1	0.54	2.73	1.1	8.74	0.65	4.1	1.38	15.73	0.73	3.68	0.56	1.88
ILMN_2099745	P53AIP1	p53-regulated apoptosis-inducing protein 1 (P53AIP1), mRNA.	NM_022112.1	0.01	0.01	1.26	7.56	-0.07	0.11	1.07	14.26	1.15	13.33	1.24	5.85
ILMN_1812031	PALM	paralemmin (PALM), transcript variant 1, mRNA.	NM_002579.2	1.77	12.82	1.38	9.38	1.78	17.87	1.86	19.11	0.07	0.02	-0.4	0.48
ILMN_1710495	PAPLN	papilin, proteoglycan-like sulfated glycoprotein (PAPLN), mRNA.	NM_173462.3	1.16	5.12	0.42	0.87	1.52	14.01	1.07	7.73	-0.45	0.66	-0.74	1.38
ILMN_2372136	PH-4	hypoxia-inducible factor prolyl 4-hydroxylase (PH-4), transcript variant 3, mRNA.	NM_177938.2	1.12	7.52	1.09	7.34	1.41	16.36	1	9.28	-0.41	0.82	-0.03	0.01
ILMN_1693192	PI3	peptidase inhibitor 3, skin-derived (SKALP) (PI3), mRNA.	NM_002638.2	1.45	5.93	1.71	7.77	1.6	10.64	1.5	9.55	-0.1	0.02	0.27	0.09
ILMN_1666924	PINK1	PTEN induced putative kinase 1 (PINK1), nuclear gene encoding mitochondrial protein, mRNA.	NM_032409.2	1.1	6.86	0.69	3.32	1.25	8.58	0.79	3.7	-0.45	0.54	-0.41	0.54
ILMN_2383383	PIR	pirin (iron-binding nuclear protein) (PIR), transcript variant 2, mRNA.	NM_001018109.1	1.15	7.69	1.17	8.02	1.4	21.57	1.2	17.1	-0.2	0.21	0.02	0
ILMN_1720034	PKHD1	polycystic kidney and hepatic disease 1 (autosomal recessive) (PKHD1), transcript variant 1, mRNA.	NM_138694.3	1.18	4.01	1.33	5.05	0.83	5.11	1.33	11.89	0.5	0.99	0.15	0.04
ILMN_1663454	PKP1	plakophilin 1 (ectodermal dysplasia/skin fragility syndrome) (PKP1), transcript variant 1a, mRNA.	NM_001005337.1	1.53	9.43	1.35	8.06	0.84	5.22	1.03	7.49	0.18	0.08	-0.18	0.07
ILMN_1762561	PLA2G10	phospholipase A2, group X (PLA2G10), mRNA.	NM_003561.1	3.71	18.92	3.12	16.06	3.53	24.71	3.16	21.03	-0.38	0.13	-0.59	0.52
ILMN_1653026	PLAC8	placenta-specific 8 (PLAC8), mRNA.	NM_016619.1	0.71	2.24	1.08	4.84	1	7.68	0.95	7	-0.05	0.01	0.38	0.25
ILMN_1797557	PLEKHA6	pleckstrin homology domain containing, family A member 6 (PLEKHA6), mRNA.	NM_014935.2	1.53	11.3	1.02	6.62	1.53	13.85	0.98	6.42	-0.55	1.12	-0.5	1.01
ILMN_1702899	PLEKHA7	pleckstrin homology domain containing, family A member 7 (PLEKHA7), mRNA.	NM_175058.3	0.8	6.71	1.28	12.72	1.16	14.74	1.6	24.25	0.44	1.51	0.48	1.83
ILMN_1708041	PLEKHF1	pleckstrin homology domain containing, family F (with FYVE domain) member 1 (PLEKHF1), mRNA.	NM_024310.4	0.88	5.5	2.05	16.5	0.86	7	1.14	11.5	0.28	0.3	1.17	6.83
ILMN_1804652	PLEKHH3	pleckstrin homology domain containing, family H (with MyTH4 domain) member 3 (PLEKHH3), mRNA.	NM_024927.3	1.3	11.31	0.84	6.21	1.09	8.72	0.99	7.29	-0.1	0.03	-0.46	1.27
ILMN_1742330	PLXNB1	plexin B1 (PLXNB1), mRNA.	NM_002673.3	1.53	6.88	1.44	6.38	1.06	11.22	1.19	13.68	0.13	0.06	-0.1	0.02
ILMN_1662587	PNPLA7	patatin-like phospholipase domain containing 7 (PNPLA7), mRNA.	NM_152286.2	1.69	8.51	1.61	8.08	1.18	5.75	0.83	2.95	-0.35	0.18	-0.08	0.02
ILMN_1748831	PPP1R13B	protein phosphatase 1, regulatory (inhibitor) subunit 13B (PPP1R13B), mRNA.	NM_015316.2	1.28	11.74	1.4	13.07	0.98	10.39	1.31	16.91	0.33	0.61	0.12	0.06
ILMN_1801105	PRKCD	protein kinase C, delta (PRKCD), transcript variant 1, mRNA.	NM_006254.3	1.91	16.85	1.56	13.49	1.63	16.15	1.4	12.59	-0.23	0.14	-0.35	0.56
ILMN_1671365	PRODH	proline dehydrogenase (oxidase) 1 (PRODH), nuclear gene encoding mitochondrial protein, mRNA.	NM_016335.2	2.3	8.02	2.58	9.51	1.67	13.39	1.5	11.18	-0.17	0.06	0.28	0.06
ILMN_1761946	PROM2	prominin 2 (PROM2), mRNA.	NM_144707.1	1.45	14.97	1.26	12.72	1.3	19.07	1.18	16.42	-0.12	0.07	-0.2	0.2
ILMN_2064150	PRRG2	proline rich Gla (G-carboxyglutamic acid) 2 (PRRG2), mRNA.	NM_000951.1	1.83	13.13	1.87	13.5	1.47	16.95	1.27	13.43	-0.2	0.13	0.04	0.01
ILMN_2377459	PSCD2	pleckstrin homology, Sec7 and coiled-coil domains 2 (cytohesin-2) (PSCD2), transcript variant 2, mRNA.	NM_004228.4	1.29	5.75	1.06	4.29	1.33	15	1.21	12.85	-0.12	0.05	-0.23	0.08
ILMN_1698766	PYCARD	PYD and CARD domain containing (PYCARD), transcript variant 1, mRNA.	NM_013258.3	1.44	10.09	1.73	12.71	1.06	12.13	0.93	9.62	-0.14	0.07	0.28	0.22
ILMN_1731699	RAB15	RAB15, member RAS onocogene family (RAB15), mRNA.	NM_198686.1	1.14	2.88	0.67	1.14	1.12	5.09	1.09	4.8	-0.03	0	-0.47	0.19
ILMN_1790317	RAB26	RAB26, member RAS oncogene family (RAB26), mRNA.	NM_014353.4	1.91	8.26	1.99	8.86	1.72	10.13	1.58	8.68	-0.15	0.03	0.08	0.01
ILMN_2230566	RAB40B	RAB40B, member RAS oncogene family (RAB40B), mRNA.	NM_006822.1	0.92	4.72	1.04	5.92	1.43	15.31	1.05	9.05	-0.39	0.6	0.13	0.04
ILMN_1659836	RAET1G	retinoic acid early transcript 1G (RAET1G), mRNA.	NM_001001788.2	1.07	5.58	1.06	5.62	1.32	10.84	0.95	6.11	-0.36	0.37	-0.01	0
ILMN_2206126	RAET1L	retinoic acid early transcript 1L (RAET1L), mRNA.	NM_130900.2	1.44	7.33	1.29	6.33	1.17	8.44	0.7	3.23	-0.47	0.68	-0.15	0.05
ILMN_1758613	RAPGEFL1	Rap guanine nucleotide exchange factor (GEF)-like 1 (RAPGEFL1), mRNA.	NM_016339.2	1.02	7.27	1.02	7.39	1.08	10.21	0.92	7.69	-0.16	0.08	0	0
ILMN_1665135	RBBP6	retinoblastoma binding protein 6 (RBBP6), transcript variant 3, mRNA.	NM_032626.5	1.07	4.67	1.19	5.69	1.39	12.78	1.87	20.35	0.47	0.83	0.12	0.03
ILMN_1747968	RBM33	RNA binding motif protein 33 (RBM33), transcript variant 1, mRNA.	NM_001008408.3	0.51	1.8	1.41	9.59	0.31	1.07	1.03	10.77	0.72	4.01	0.9	3.56
ILMN_1762803	RFXDC2	regulatory factor X domain containing 2 (RFXDC2), mRNA.	NM_022841.4	0.1	0.05	1.54	4.64	-0.63	2.22	0.77	3.28	1.4	7.93	1.45	2.85
ILMN_1717636	RGMA	RGM domain family, member A (RGMA), mRNA.	NM_020211.1	-0.02	0.01	1.02	5.77	1.01	7.66	0.99	7.39	-0.02	0	1.03	4.42
ILMN_1698484	RHOV	ras homolog gene family, member V (RHOV), mRNA.	NM_133639.2	0.82	1.51	1.72	5.68	1.43	9.68	1.7	12.92	0.26	0.12	0.9	0.92
ILMN_1680018	RIPK4	receptor-interacting serine-threonine kinase 4 (RIPK4), mRNA.	NM_020639.2	1.02	4.69	1.26	6.68	2.27	21.87	1.79	15.14	-0.48	0.59	0.24	0.11
ILMN_1713369	RPL13A	ribosomal protein L13a (RPL13A), mRNA.	NM_012423.2	1.03	6.76	1.09	7.42	1.08	8.16	1.02	7.31	-0.06	0.01	0.06	0.02
ILMN_2298818	RPS29	ribosomal protein S29 (RPS29), transcript variant 2, mRNA.	NM_001030001.1	1.71	8.58	2.43	13.44	2.3	27.32	2.92	37.06	0.61	1.71	0.72	1.14
ILMN_1687315	RXRA	retinoid X receptor, alpha (RXRA), mRNA.	NM_002957.3	1.75	17.42	1.48	14.55	1.02	12.82	0.93	11	-0.09	0.04	-0.27	0.39
ILMN_1688780	S100A4	S100 calcium binding protein A4 (S100A4), transcript variant 2, mRNA.	NM_019554.2	1.99	7.36	1.67	5.75	2.61	17.04	2.4	15.05	-0.2	0.04	-0.32	0.09
ILMN_1684306	S100A4	S100 calcium binding protein A4 (S100A4), transcript variant 2, mRNA.	NM_019554.2	1.77	6.14	1.54	5.08	2.22	15.13	2.24	15.3	0.01	0	-0.22	0.05
ILMN_1729801	S100A8	S100 calcium binding protein A8 (S100A8), mRNA.	NM_002964.3	1.01	4.59	0.75	2.9	1	6.05	1.03	6.46	0.04	0.01	-0.25	0.12
ILMN_1728298	SBK1	SH3-binding domain kinase 1 (SBK1), mRNA.	NM_001024401.2	1.02	6.82	1.05	7.23	1.27	16.42	0.7	5.85	-0.57	2.68	0.03	0.01
ILMN_2372011	SCAND1	SCAN domain containing 1 (SCAND1), transcript variant 2, mRNA.	NM_033630.1	1.22	6.45	1.49	8.72	1.02	12.06	1.22	16.34	0.21	0.2	0.27	0.14
ILMN_1794230	SCAND1	SCAN domain containing 1 (SCAND1), transcript variant 1, mRNA.	NM_016558.2	1.4	9.65	1.56	11.13	0.8	8.04	1.05	12.9	0.25	0.34	0.16	0.07
ILMN_1655347	SCGB1A1	secretoglobin, family 1A, member 1 (uteroglobin) (SCGB1A1), mRNA.	NM_003357.3	3.67	11.28	3.44	10.43	3.55	28.64	3.62	29.41	0.06	0.01	-0.23	0.03
ILMN_1713995	SCNN1A	sodium channel, nonvoltage-gated 1 alpha (SCNN1A), mRNA.	NM_001038.4	2.07	14.74	2.1	15.01	2.04	22.48	1.82	19.08	-0.21	0.11	0.04	0.01
ILMN_2153837	SCNN1G	sodium channel, nonvoltage-gated 1, gamma (SCNN1G), mRNA.	NM_001039.2	1.39	9.23	0.63	2.69	1.1	6.18	0.41	0.88	-0.69	1.46	-0.76	2.49
ILMN_1767470	SCPEP1	serine carboxypeptidase 1 (SCPEP1), mRNA.	NM_021626.1	1.31	9.38	1.12	7.67	1.38	12.32	1.11	8.51	-0.27	0.19	-0.19	0.1
ILMN_2376822	SDCBP2	syndecan binding protein (syntenin) 2 (SDCBP2), transcript variant 2, mRNA.	NM_015685.3	2.26	11.54	2	9.95	1.81	12.78	1.72	11.78	-0.09	0.02	-0.26	0.09
ILMN_1700310	SDCBP2	syndecan binding protein (syntenin) 2 (SDCBP2), transcript variant 1, mRNA.	NM_080489.3	2.54	16.38	2.4	15.4	2.34	17.74	2.33	17.69	-0.01	0	-0.14	0.04
ILMN_1680652	SELENBP1	selenium binding protein 1 (SELENBP1), mRNA.	NM_003944.2	0.91	3.89	1.24	6.6	1	8.71	0.77	5.35	-0.24	0.18	0.33	0.22
ILMN_1703855	SERPINB3	serpin peptidase inhibitor, clade B (ovalbumin), member 3 (SERPINB3), mRNA.	NM_006919.1	1.52	7.79	1.69	9.14	2	14.25	2.12	15.71	0.12	0.02	0.17	0.05
ILMN_2216918	SHPK	sedoheptulokinase (SHPK), mRNA.	NM_013276.2	0.47	3.38	1.03	11.14	0.59	4.77	1.05	13.41	0.46	1.85	0.56	3.29
ILMN_1791912	SIDT2	SID1 transmembrane family, member 2 (SIDT2), mRNA.	NM_001040455.1	0.94	6.26	1.26	9.53	1.07	9.85	1.38	15.14	0.31	0.37	0.31	0.34
ILMN_1755649	SLC16A5	solute carrier family 16, member 5 (monocarboxylic acid transporter 6) (SLC16A5), mRNA.	NM_004695.2	1.27	14.15	1.15	12.63	1.13	18.36	1.02	15.78	-0.11	0.07	-0.12	0.09
ILMN_1679949	SLC25A23	solute carrier family 25 (mitochondrial carrier; phosphate carrier), member 23 (SLC25A23), nuclear gene encoding mitochondrial protein, mRNA.	NM_024103.2	1.21	8.23	1.42	10.31	1.01	13.29	1.19	17.37	0.18	0.17	0.21	0.12
ILMN_1709399	SLC25A34	solute carrier family 25, member 34 (SLC25A34), mRNA.	NM_207348.1	-0.59	2.73	0.49	2.08	-0.05	0.06	0.95	8.8	1	7.63	1.08	5.93
ILMN_1810025	SLC39A2	solute carrier family 39 (zinc transporter), member 2 (SLC39A2), mRNA.	NM_014579.1	3.07	12.1	2.83	11	2.92	28.07	2.61	24.15	-0.31	0.16	-0.23	0.05
ILMN_1678928	SLCO3A1	solute carrier organic anion transporter family, member 3A1 (SLCO3A1), mRNA.	NM_013272.2	0.83	4.84	1.05	7.03	0.81	6.53	1.07	10.61	0.25	0.25	0.21	0.13
ILMN_2114720	SLPI	secretory leukocyte peptidase inhibitor (SLPI), mRNA.	NM_003064.2	2.1	10.94	2.09	10.9	2.5	13.98	2.54	14.41	0.04	0	-0.01	0
ILMN_1717639	SNF1LK	SNF1-like kinase (SNF1LK), mRNA.	NM_173354.3	1.29	5.46	1.27	5.42	0.37	1.23	1.05	9.34	0.67	2.8	-0.03	0
ILMN_1669210	SNORD16	small nucleolar RNA, C/D box 16 (SNORD16) on chromosome 15.	NR_002440.1	-0.07	0.05	1.04	3.91	0.33	0.66	2.1	20.82	1.76	13.4	1.11	2.99
ILMN_1694367	SNORD35B	small nucleolar RNA, C/D box 35B (SNORD35B) on chromosome 19.	NR_001285.1	0.74	2.15	1.81	9.31	0.73	3.99	1.43	13.41	0.7	2.41	1.07	2.92
ILMN_1676099	SPON2	spondin 2, extracellular matrix protein (SPON2), mRNA.	NM_012445.1	1.76	6.75	1.71	6.59	0.99	5.74	1.04	6.27	0.05	0.01	-0.05	0.01
ILMN_1716591	SPRR1A	small proline-rich protein 1A (SPRR1A), mRNA.	NM_005987.2	1.84	6.45	2.18	8.37	2.13	24.48	2.18	25.33	0.05	0.01	0.34	0.1
ILMN_1663035	SREBF1	sterol regulatory element binding transcription factor 1 (SREBF1), transcript variant 1, mRNA.	NM_001005291.1	1.49	10.43	1.31	8.86	1.13	9.13	1.08	8.47	-0.05	0.01	-0.18	0.09
ILMN_1755234	SSH3	slingshot homolog 3 (Drosophila) (SSH3), mRNA.	NM_017857.2	1.14	9.61	0.8	5.79	1.18	16.59	1	12.67	-0.18	0.17	-0.35	0.59
ILMN_1775486	SSPN	sarcospan (Kras oncogene-associated gene) (SSPN), mRNA.	NM_005086.3	1.15	6.61	1.11	6.42	1.53	13.43	1.51	13.09	-0.03	0	-0.04	0.01
ILMN_1658706	ST6GALNAC2	ST6 (alpha-N-acetyl-neuraminyl-2,3-beta-galactosyl-1, 3)-N-acetylgalactosaminide alpha-2,6-sialyltransferase 2 (ST6GALNAC2), mRNA.	NM_006456.1	1.41	9.06	1.1	6.43	1.28	8.65	0.88	4.32	-0.4	0.37	-0.31	0.24
ILMN_1668592	STON1	stonin 1 (STON1), mRNA.	NM_006873.2	1.29	5.07	1.4	5.93	1.3	7.34	0.64	1.86	-0.66	1.06	0.11	0.03
ILMN_1727805	SYNGR1	synaptogyrin 1 (SYNGR1), transcript variant 1a, mRNA.	NM_004711.3	0.95	6.5	1.53	12.45	0.94	8.68	1.14	12.11	0.2	0.14	0.58	1.75
ILMN_1750785	SYTL1	synaptotagmin-like 1 (SYTL1), mRNA.	NM_032872.1	1.48	5.91	1.4	5.59	0.99	5.29	1.14	6.85	0.15	0.04	-0.07	0.01
ILMN_2153679	TBC1D3B	TBC1 domain family, member 3B (TBC1D3B), mRNA.	NM_001001417.4	2.09	7.18	2.31	8.45	1.04	5.63	1.19	7.16	0.15	0.04	0.23	0.05
ILMN_2068991	TBC1D3G	TBC1 domain family, member 3G (TBC1D3G), mRNA.	NM_001040282.1	1.87	5.8	1.83	5.74	1	5.62	1.11	6.85	0.11	0.03	-0.04	0
ILMN_1726928	TCEA3	transcription elongation factor A (SII), 3 (TCEA3), mRNA.	NM_003196.1	1.65	12.31	1.53	11.25	1.75	23.13	1.47	17.86	-0.28	0.31	-0.12	0.05
ILMN_1768469	TCN1	transcobalamin I (vitamin B12 binding protein, R binder family) (TCN1), mRNA.	NM_001062.3	1.36	2.78	1.34	2.82	1.16	4.12	0.93	2.67	-0.23	0.06	-0.02	0
ILMN_1784287	TGFBR3	transforming growth factor, beta receptor III (TGFBR3), mRNA.	NM_003243.2	0.76	4.56	1.03	7.39	1.19	14.31	1.11	12.73	-0.08	0.03	0.27	0.24
ILMN_1721134	TGM1	transglutaminase 1 (K polypeptide epidermal type I, protein-glutamine-gamma-glutamyltransferase) (TGM1), mRNA.	NM_000359.2	1.29	7.46	0.93	4.6	1.59	15.96	1.24	10.66	-0.35	0.37	-0.36	0.31
ILMN_1804663	THBS3	thrombospondin 3 (THBS3), mRNA.	NM_007112.3	1.17	3.74	1.02	3.07	1.61	10.22	1.43	8.29	-0.18	0.05	-0.15	0.03
ILMN_1724863	TICAM1	toll-like receptor adaptor molecule 1 (TICAM1), transcript variant 2, mRNA.	NM_182919.1	1.1	4.97	1.3	6.54	0.87	8.74	1.09	12.88	0.22	0.22	0.19	0.07
ILMN_1701461	TIMP3	TIMP metallopeptidase inhibitor 3 (Sorsby fundus dystrophy, pseudoinflammatory) (TIMP3), mRNA.	NM_000362.4	1.76	6.21	1.09	2.93	1.5	6.13	1.21	4.06	-0.29	0.08	-0.66	0.46
ILMN_1697420	TINF2	TERF1 (TRF1)-interacting nuclear factor 2 (TINF2), mRNA.	NM_012461.1	1.12	3.93	0.95	3.06	1.06	6.57	0.58	2.06	-0.48	0.64	-0.17	0.04
ILMN_1659610	TJP3	tight junction protein 3 (zona occludens 3) (TJP3), mRNA.	NM_014428.1	3.1	12.16	3.08	12.11	2.7	17.74	2.39	14.71	-0.31	0.09	-0.02	0
ILMN_2340721	TMEM134	transmembrane protein 134 (TMEM134), transcript variant 3, mRNA.	NM_001078651.1	1.1	5.03	1.38	7.24	1.04	8.66	1.01	8.32	-0.02	0	0.28	0.13
ILMN_1670672	TMEM37	transmembrane protein 37 (TMEM37), mRNA.	NM_183240.2	1.33	8.1	1.48	9.48	1.43	10.74	1.07	6.36	-0.37	0.3	0.15	0.05
ILMN_2090802	TMEM79	transmembrane protein 79 (TMEM79), mRNA.	NM_032323.1	1.92	15.39	1.67	13.2	1.49	17.6	1.06	10.05	-0.43	0.95	-0.25	0.19
ILMN_1794560	TMEM93	transmembrane protein 93 (TMEM93), transcript variant 1, mRNA.	NM_001014764.1	0.55	1.22	1.21	5.21	0.63	3	1.64	16.69	1.01	5.48	0.66	0.89
ILMN_1706021	TMPRSS4	transmembrane protease, serine 4 (TMPRSS4), transcript variant 1, mRNA.	NM_019894.2	0.94	3.65	1.22	5.7	1.2	10.7	1.08	8.89	-0.12	0.04	0.28	0.12
ILMN_1727689	TNFAIP2	tumor necrosis factor, alpha-induced protein 2 (TNFAIP2), mRNA.	NM_006291.2	2.09	8.33	2.41	10.18	1.92	15.05	1.62	11.39	-0.3	0.15	0.32	0.1
ILMN_1697409	TNFRSF14	tumor necrosis factor receptor superfamily, member 14 (herpesvirus entry mediator) (TNFRSF14), mRNA.	NM_003820.2	1.38	10.4	1.75	13.88	1.66	18.02	1.49	15.39	-0.16	0.07	0.37	0.5
ILMN_1801307	TNFSF10	tumor necrosis factor (ligand) superfamily, member 10 (TNFSF10), mRNA.	NM_003810.2	2.08	7.95	2.09	8.12	2.88	13.44	2.08	7.66	-0.81	0.54	0.01	0
ILMN_1751464	TNFSF9	tumor necrosis factor (ligand) superfamily, member 9 (TNFSF9), mRNA.	NM_003811.2	0.65	2.87	1.08	6.69	1.1	9.29	1.12	9.67	0.02	0.01	0.42	0.58
ILMN_2082314	TOM1	target of myb1 (chicken) (TOM1), mRNA.	NM_005488.1	1.15	9.52	1.22	10.38	1.21	10.8	1.22	10.96	0.01	0	0.07	0.03
ILMN_1658469	TP53AP1	TP53 activated protein 1 (TP53AP1), mRNA.	NM_007233.1	1.21	6.75	1.54	9.65	1.05	7	0.74	3.59	-0.31	0.24	0.33	0.25
ILMN_1797744	TPPP3	tubulin polymerization-promoting protein family member 3 (TPPP3), mRNA.	NM_015964.2	0.89	4.03	1.23	6.87	1.19	10.95	1.02	8.38	-0.17	0.08	0.34	0.25
ILMN_1775703	TRAPPC6A	trafficking protein particle complex 6A (TRAPPC6A), mRNA.	NM_024108.1	1.16	5.84	1.27	6.82	1.01	6.16	0.76	3.52	-0.26	0.14	0.11	0.03
ILMN_1748685	TRIM31	tripartite motif-containing 31 (TRIM31), mRNA.	NM_007028.3	2.81	9.28	2.78	9.22	3.5	27.36	3.06	22.76	-0.44	0.23	-0.04	0
ILMN_1695829	TTYH2	tweety homolog 2 (Drosophila) (TTYH2), transcript variant 1, mRNA.	NM_032646.5	1.34	7.25	1.47	8.38	0.95	9.43	1.09	11.79	0.13	0.06	0.13	0.04
ILMN_1794612	UBA7	ubiquitin-like modifier activating enzyme 7 (UBA7), mRNA.	NM_003335.2	1.44	8.2	1.66	9.99	1.27	11.89	1.41	14.15	0.14	0.05	0.21	0.09
ILMN_1685625	UCP2	uncoupling protein 2 (mitochondrial, proton carrier) (UCP2), nuclear gene encoding mitochondrial protein, mRNA.	NM_003355.2	1.63	8.44	1.65	8.73	1.16	8.02	1.01	6.17	-0.16	0.05	0.02	0
ILMN_1679194	UGT2B7	PREDICTED: UDP glucuronosyltransferase 2 family, polypeptide B7 (UGT2B7), mRNA.	XM_001128725.1	0.97	4.62	1.07	5.54	1.29	15.14	0.96	9.23	-0.33	0.52	0.1	0.03
ILMN_1773313	USMG5	upregulated during skeletal muscle growth 5 homolog (mouse) (USMG5), mRNA.	NM_032747.2	1.06	3.68	2.33	11.99	1.24	10.79	2.03	23.65	0.79	3.36	1.28	3.74
ILMN_1809467	VAMP5	vesicle-associated membrane protein 5 (myobrevin) (VAMP5), mRNA.	NM_006634.2	1.22	4.91	1.94	9.87	0.9	4.95	1.52	12.64	0.62	1.37	0.72	1.06
ILMN_1715647	VANGL2	vang-like 2 (van gogh, Drosophila) (VANGL2), mRNA.	NM_020335.1	1.14	6.22	1.23	7.1	1.06	8.3	0.94	6.64	-0.12	0.04	0.09	0.03
ILMN_2199389	VIPR1	vasoactive intestinal peptide receptor 1 (VIPR1), mRNA.	NM_004624.2	1.67	10.06	0.85	3.67	1.25	10.97	1.2	10.29	-0.05	0.01	-0.83	2.27
ILMN_1753101	VTCN1	V-set domain containing T cell activation inhibitor 1 (VTCN1), mRNA.	NM_024626.2	2.3	12.14	2.74	14.76	2.33	24.87	2.25	23.74	-0.08	0.02	0.44	0.29
ILMN_1752755	VWF	von Willebrand factor (VWF), mRNA.	NM_000552.3	3.16	11.9	3.52	13.51	2.83	23.25	2.96	24.72	0.13	0.02	0.36	0.1
ILMN_1685427	WFDC2	WAP four-disulfide core domain 2 (WFDC2), transcript variant 3, mRNA.	NM_080733.1	1.36	5.47	1.61	7.23	1.02	8.34	0.91	6.88	-0.1	0.03	0.25	0.08
ILMN_1740415	WFDC3	WAP four-disulfide core domain 3 (WFDC3), mRNA.	NM_080614.1	1.87	7.9	1.65	6.69	1.83	11.54	1.56	8.8	-0.27	0.09	-0.22	0.06
ILMN_2308903	WFDC3	WAP four-disulfide core domain 3 (WFDC3), transcript variant 2, mRNA.	NM_181522.1	2.47	11.04	2.37	10.49	2.75	17.18	2.25	12.48	-0.5	0.26	-0.1	0.02
ILMN_1666392	WNT4	wingless-type MMTV integration site family, member 4 (WNT4), mRNA.	NM_030761.3	1.82	14.69	1.01	7.01	1.66	15.73	2	21.05	0.34	0.31	-0.8	3.53
ILMN_1791147	YPEL3	yippee-like 3 (Drosophila) (YPEL3), mRNA.	NM_031477.4	2.33	12.61	1.99	10.43	2.1	15.01	1.85	12.18	-0.25	0.08	-0.34	0.16
ILMN_1686968	ZNF362	zinc finger protein 362 (ZNF362), mRNA.	NM_152493.2	1.21	11.39	0.85	7.08	1.13	15.02	0.88	9.96	-0.25	0.34	-0.37	0.81
ILMN_1779015	ZNF467	zinc finger protein 467 (ZNF467), mRNA.	NM_207336.1	1.2	7.02	1.18	6.95	1.04	9.21	0.83	6.06	-0.22	0.15	-0.02	0
ILMN_1810147	ZNF524	zinc finger protein 524 (ZNF524), mRNA.	NM_153219.2	0.86	3.63	1.29	7.15	0.9	6.57	1.15	10.25	0.25	0.19	0.43	0.43
ILMN_1679093	ZNF581	zinc finger protein 581 (ZNF581), mRNA.	NM_016535.3	1.12	7.32	1.62	12.13	0.93	9.92	1.08	12.88	0.15	0.1	0.5	0.99
ILMN_1698189	AASDHPPT	aminoadipate-semialdehyde dehydrogenase-phosphopantetheinyl transferase (AASDHPPT), mRNA.	NM_015423.2	-1	3.31	-0.92	2.94	-1.31	12.15	-1.47	14.81	-0.17	0.07	0.09	0.02
ILMN_1674032	ABCD3	ATP-binding cassette, sub-family D (ALD), member 3 (ABCD3), mRNA.	NM_002858.2	-0.74	3.02	-1.01	5.26	-1.08	8.87	-0.84	5.57	0.24	0.17	-0.27	0.15
ILMN_1655702	ABHD5	abhydrolase domain containing 5 (ABHD5), mRNA.	NM_016006.3	-1.08	8.39	-1.21	9.88	-1.19	13.89	-1.15	13.25	0.04	0.01	-0.13	0.06
ILMN_1778104	ACADM	acyl-Coenzyme A dehydrogenase, C-4 to C-12 straight chain (ACADM), nuclear gene encoding mitochondrial protein, mRNA.	NM_000016.2	-1.33	6.47	-1.5	7.81	-1.08	6.6	-1.02	5.96	0.06	0.01	-0.17	0.05
ILMN_1697585	ACTR6	ARP6 actin-related protein 6 homolog (yeast) (ACTR6), mRNA.	NM_022496.3	-0.87	5.15	-1.03	6.82	-0.74	4.48	-1.14	9.89	-0.4	0.61	-0.16	0.08
ILMN_1695590	ADRB2	adrenergic, beta-2-, receptor, surface (ADRB2), mRNA.	NM_000024.4	-0.64	2.3	-1.16	6.39	0.51	2.76	-0.7	5.13	-1.21	11.16	-0.52	0.74
ILMN_1771411	ALG6	asparagine-linked glycosylation 6 homolog (S. cerevisiae, alpha-1,3-glucosyltransferase) (ALG6), mRNA.	NM_013339.2	-0.98	5.35	-1.1	6.6	-1	8.53	-1.07	9.6	-0.07	0.02	-0.13	0.04
ILMN_1788462	AMD1	adenosylmethionine decarboxylase 1 (AMD1), transcript variant 2, mRNA.	NM_001033059.1	-1.16	3.46	-1.76	6.97	-1.07	5.4	-1.44	9.22	-0.37	0.24	-0.61	0.43
ILMN_1667994	AMD1	adenosylmethionine decarboxylase 1 (AMD1), transcript variant 1, mRNA.	NM_001634.4	-0.8	1.1	-2.1	6.29	-0.04	0.03	-1.52	9.75	-1.48	7.27	-1.3	1.72
ILMN_1779374	AMMECR1	Alport syndrome, mental retardation, midface hypoplasia and elliptocytosis chromosomal region, gene 1 (AMMECR1), transcript variant 1, mRNA.	NM_015365.2	-1.15	4.95	-1.44	7.15	-0.8	3.56	-1.09	6.36	-0.29	0.16	-0.29	0.13
ILMN_1726327	AMY1B	amylase, alpha 1B (salivary) (AMY1B), mRNA.	NM_001008218.1	-1.72	9.69	-1.67	9.38	-1.71	17.36	-1.2	9.66	0.51	1.02	0.05	0.01
ILMN_1770378	ANAPC10	anaphase promoting complex subunit 10 (ANAPC10), mRNA.	NM_014885.3	-1.13	4.3	-1.26	5.27	-1.43	12.07	-1.31	10.39	0.12	0.04	-0.13	0.03
ILMN_2148507	ANKRD13C	ankyrin repeat domain 13C (ANKRD13C), mRNA.	NM_030816.2	-1.01	5.34	-0.69	2.92	-1.31	11.78	-1.1	8.68	0.21	0.12	0.32	0.24
ILMN_1756417	ANKRD37	ankyrin repeat domain 37 (ANKRD37), mRNA.	NM_181726.2	-1.11	8.14	-1.6	13.13	-0.98	10.28	-1.69	24.22	-0.7	4.05	-0.49	1.18
ILMN_1669259	ANKRD49	ankyrin repeat domain 49 (ANKRD49), mRNA.	NM_017704.2	-0.79	3.17	-1.4	8.09	-0.82	4.92	-1.35	12.07	-0.53	1.15	-0.61	1.1
ILMN_1724040	ANKRD57	ankyrin repeat domain 57 (ANKRD57), mRNA.	NM_023016.3	0.06	0.04	-1.12	4.37	-0.46	2.49	-1.19	14.65	-0.74	4.69	-1.18	3.34
ILMN_1739645	ANLN	anillin, actin binding protein (ANLN), mRNA.	NM_018685.2	-1.41	4.59	-1.38	4.57	-1.69	11.35	-1.81	12.72	-0.12	0.02	0.03	0
ILMN_2215881	ARHGAP11B	Rho GTPase activating protein 11B (ARHGAP11B), mRNA. XM_931045 XM_931050	NM_001039841.1	-1.18	2.97	-1.15	2.93	-0.66	2.14	-1.19	6.82	-0.54	0.67	0.03	0
ILMN_1753500	ARHGAP12	Rho GTPase activating protein 12 (ARHGAP12), mRNA.	NM_018287.5	-0.79	1.48	-1.06	2.65	-1.19	5.93	-1.29	6.84	-0.1	0.02	-0.27	0.06
ILMN_2338447	ARID4A	AT rich interactive domain 4A (RBP1-like) (ARID4A), transcript variant 2, mRNA.	NM_023000.2	-1.04	3.04	-1.26	4.35	-1.36	8.99	-1.18	6.98	0.18	0.06	-0.22	0.06
ILMN_1810229	ARID4A	AT rich interactive domain 4A (RBP1-like) (ARID4A), transcript variant 3, mRNA.	NM_023001.2	-1.62	7.5	-1.5	6.77	-1.08	8.89	-1.08	8.86	0	0	0.13	0.03
ILMN_2120022	ARL5B	ADP-ribosylation factor-like 5B (ARL5B), mRNA.	NM_178815.3	-1.04	5.3	-1.35	8.02	-1.46	13.7	-1.39	12.67	0.07	0.02	-0.31	0.21
ILMN_1680465	ARL5B	ADP-ribosylation factor-like 5B (ARL5B), mRNA.	NM_178815.3	-1.11	7.9	-1.38	10.62	-1.06	5.65	-0.92	4.29	0.14	0.04	-0.26	0.22
ILMN_1741156	ARMCX5	armadillo repeat containing, X-linked 5 (ARMCX5), mRNA.	NM_022838.2	-0.91	4.33	-1.27	7.52	-1.15	10.29	-1.11	9.72	0.04	0.01	-0.37	0.33
ILMN_2184064	ARRDC4	arrestin domain containing 4 (ARRDC4), mRNA.	NM_183376.1	-1.61	9.4	-1.44	8.16	-1.44	12.01	-1.64	14.87	-0.2	0.08	0.17	0.06
ILMN_1660544	ARRDC4	arrestin domain containing 4 (ARRDC4), mRNA.	NM_183376.1	-1.76	9.1	-1.65	8.41	-1.98	15.86	-2.16	18.27	-0.18	0.05	0.11	0.03
ILMN_1791647	ASIP	agouti signaling protein, nonagouti homolog (mouse) (ASIP), mRNA.	NM_001672.2	-1.37	8.69	-1.23	7.64	-1.04	6.2	-1.24	8.51	-0.2	0.08	0.13	0.05
ILMN_2048700	ATAD2	ATPase family, AAA domain containing 2 (ATAD2), mRNA.	NM_014109.2	-1.17	2.3	-1.17	2.4	-1.95	12.38	-1.69	9.66	0.27	0.09	0	0
ILMN_2374865	ATF3	activating transcription factor 3 (ATF3), transcript variant 4, mRNA.	NM_001040619.1	-1.39	4.66	-2.87	13.07	-1.85	14.71	-1.91	15.47	-0.05	0.01	-1.48	3.87
ILMN_1661428	ATP11C	ATPase, class VI, type 11C (ATP11C), transcript variant 1, mRNA.	NM_173694.3	-1.11	5.24	-1.12	5.45	-1.09	10.74	-1.01	9.52	0.07	0.02	-0.01	0
ILMN_1680955	AURKA	aurora kinase A (AURKA), transcript variant 5, mRNA.	NM_198436.1	-0.54	1.78	-1.3	7.98	-0.65	3.98	-1.5	17.41	-0.85	4.88	-0.76	2.24
ILMN_2357438	AURKA	aurora kinase A (AURKA), transcript variant 3, mRNA.	NM_198434.1	-0.78	3.51	-1.4	8.98	-0.79	5.7	-1.65	19.94	-0.86	4.93	-0.63	1.41
ILMN_1661500	B4GALT4	UDP-Gal:betaGlcNAc beta 1,4- galactosyltransferase, polypeptide 4 (B4GALT4), transcript variant 2, mRNA.	NM_003778.3	0.42	1.47	-0.75	4.38	0.73	4.13	-0.35	0.96	-1.08	6.65	-1.17	6.86
ILMN_1691410	BAMBI	BMP and activin membrane-bound inhibitor homolog (Xenopus laevis) (BAMBI), mRNA.	NM_012342.2	0.39	0.22	-1.84	3.6	-1.24	1.64	-1.61	2.83	-0.37	0.05	-2.24	3.54
ILMN_2074258	BARD1	BRCA1 associated RING domain 1 (BARD1), mRNA.	NM_000465.1	-1.55	8.96	-1.66	9.88	-0.9	4.35	-1.23	7.75	-0.33	0.21	-0.11	0.03
ILMN_1651826	BASP1	brain abundant, membrane attached signal protein 1 (BASP1), mRNA.	NM_006317.3	-0.95	3.77	-1.27	6.17	-1.2	9.58	-0.8	4.61	0.4	0.5	-0.32	0.17
ILMN_1743137	BAT2D1	BAT2 domain containing 1 (BAT2D1), mRNA.	NM_015172.3	-1.05	3.36	-1	3.23	-1.36	9.02	-1.22	7.37	0.15	0.04	0.05	0.01
ILMN_1720850	BAZ2B	bromodomain adjacent to zinc finger domain, 2B (BAZ2B), mRNA.	NM_013450.2	-0.74	3.41	-1.01	5.93	-0.88	7.2	-1.19	12.16	-0.31	0.37	-0.28	0.19
ILMN_1737314	BCL6	B-cell CLL/lymphoma 6 (zinc finger protein 51) (BCL6), transcript variant 1, mRNA.	NM_001706.2	-0.71	2.62	-1.43	8.26	1.02	5.41	-1.02	5.42	-2.04	15.18	-0.72	1.62
ILMN_2357272	BCLAF1	BCL2-associated transcription factor 1 (BCLAF1), transcript variant 1, mRNA.	NM_014739.2	-1.36	5.8	-1.26	5.24	-1.65	9.95	-1.49	8.3	0.16	0.04	0.1	0.02
ILMN_1722718	BMP2	bone morphogenetic protein 2 (BMP2), mRNA.	NM_001200.2	-0.04	0.02	-1.39	4.77	0.38	1.04	-0.62	2.92	-1	5.42	-1.35	3.18
ILMN_1775943	BRMS1L	breast cancer metastasis-suppressor 1-like (BRMS1L), mRNA.	NM_032352.3	-0.88	3.31	-1.26	6.17	-1.36	13.69	-1.48	15.74	-0.12	0.04	-0.39	0.27
ILMN_1759359	BTF3L4	basic transcription factor 3-like 4 (BTF3L4), mRNA.	NM_152265.2	-0.55	1.03	-1.07	3.68	-1.52	11.16	-1.33	8.96	0.18	0.06	-0.52	0.38
ILMN_1775743	BTG1	B-cell translocation gene 1, anti-proliferative (BTG1), mRNA.	NM_001731.1	-0.08	0.1	-1.16	8.78	0.61	3.44	-0.75	5.07	-1.36	12.16	-1.07	6.3
ILMN_2202948	BUB1	BUB1 budding uninhibited by benzimidazoles 1 homolog (yeast) (BUB1), mRNA.	NM_004336.2	-1	4.97	-1.33	7.81	-0.94	6.53	-1.33	11.96	-0.39	0.5	-0.33	0.24
ILMN_1664167	BXDC1	brix domain containing 1 (BXDC1), mRNA.	NM_032194.1	-1.18	3.29	-1	2.57	-1.05	7.68	-0.79	4.54	0.26	0.17	0.18	0.04
ILMN_2163051	C11orf77	chromosome 11 open reading frame 77 (C11orf77), mRNA.	NM_173811.2	-0.68	2.74	-1.11	6.37	-0.62	3.05	-1.4	13.64	-0.79	3.39	-0.43	0.51
ILMN_1790100	C11orf82	chromosome 11 open reading frame 82 (C11orf82), mRNA.	NM_145018.2	-1.48	6.6	-1.8	8.94	-2.13	18.29	-1.84	14.55	0.29	0.15	-0.33	0.15
ILMN_1761486	C13orf34	chromosome 13 open reading frame 34 (C13orf34), mRNA.	NM_024808.2	-1.04	4.68	-1.14	5.56	-0.82	5.79	-1.31	13.17	-0.49	1.14	-0.1	0.03
ILMN_1712748	C14orf129	chromosome 14 open reading frame 129 (C14orf129), mRNA.	NM_016472.3	-0.97	3.02	-1.06	3.65	-1.74	14.9	-1.66	13.85	0.08	0.02	-0.09	0.02
ILMN_2181883	C14orf129	chromosome 14 open reading frame 129 (C14orf129), mRNA.	NM_016472.3	-1.1	4.67	-1.01	4.2	-1	5.93	-1.05	6.39	-0.04	0.01	0.09	0.02
ILMN_1807031	C14orf28	chromosome 14 open reading frame 28 (C14orf28), mRNA.	NM_001017923.1	-0.78	3.12	-1.09	5.54	-0.4	1.35	-1.04	8.76	-0.64	2.3	-0.3	0.18
ILMN_1706483	C1orf116	chromosome 1 open reading frame 116 (C1orf116), transcript variant 1, mRNA.	NM_023938.5	0.81	3.07	-0.62	2	0.58	4.08	-0.74	6.44	-1.33	14.71	-1.43	6.21
ILMN_1760556	C1orf63	chromosome 1 open reading frame 63 (C1orf63), transcript variant 1, mRNA.	NM_207035.1	-0.54	1.01	-2.44	12.26	-1.56	10.56	-3.08	30	-1.53	8.06	-1.9	7.2
ILMN_2184612	C3orf52	chromosome 3 open reading frame 52 (C3orf52), mRNA.	NM_024616.1	0.61	0.79	-1.69	5.16	0.36	0.86	-0.78	4.17	-1.15	6.53	-2.3	6.53
ILMN_1662184	C5orf34	chromosome 5 open reading frame 34 (C5orf34), mRNA.	NM_198566.1	-1.36	9.86	-1.62	12.43	-1.39	17.51	-1.77	25.08	-0.38	0.78	-0.27	0.21
ILMN_1776788	C5orf41	chromosome 5 open reading frame 41 (C5orf41), mRNA.	NM_153607.1	-1.06	3.44	-0.86	2.47	-0.99	3.33	-1.44	6.85	-0.46	0.27	0.2	0.05
ILMN_2195821	C5orf41	chromosome 5 open reading frame 41 (C5orf41), mRNA.	NM_153607.1	-1.01	3.59	-1.14	4.5	-0.85	2.66	-1.36	6.53	-0.51	0.38	-0.12	0.03
ILMN_1741881	C9orf72	chromosome 9 open reading frame 72 (C9orf72), transcript variant 1, mRNA.	NM_018325.1	-0.88	4.56	-1.01	5.86	-0.98	7.47	-1.24	11.31	-0.26	0.2	-0.13	0.05
ILMN_1766408	CBFB	core-binding factor, beta subunit (CBFB), transcript variant 2, mRNA.	NM_001755.2	-0.68	1.57	-1.04	3.47	-1.24	10.21	-1.02	7.31	0.21	0.11	-0.35	0.15
ILMN_1770244	CBX1	chromobox homolog 1 (HP1 beta homolog Drosophila ) (CBX1), mRNA.	NM_006807.3	-1.24	2.48	-1.03	1.85	-1.46	6.94	-1.07	3.82	0.4	0.19	0.21	0.04
ILMN_1781077	CCDC100	coiled-coil domain containing 100 (CCDC100), mRNA.	NM_153223.2	-1.13	3.89	-1.46	6.04	-1.55	11.78	-1.49	11.11	0.05	0.01	-0.33	0.13
ILMN_1809889	CCDC117	coiled-coil domain containing 117 (CCDC117), mRNA.	NM_173510.1	-1.09	4.37	-1.9	10.14	-1.52	10.55	-2.17	18.89	-0.65	1.15	-0.81	1.6
ILMN_1677239	CCDC14	coiled-coil domain containing 14 (CCDC14), mRNA.	NM_022757.3	-0.89	5.25	-1.07	7.12	-1.06	11.63	-0.96	9.84	0.1	0.04	-0.18	0.09
ILMN_1799113	CCDC41	coiled-coil domain containing 41 (CCDC41), transcript variant 1, mRNA.	NM_016122.2	-1.03	5.35	-0.85	4.06	-1.08	10.16	-0.99	8.69	0.09	0.03	0.18	0.07
ILMN_1686920	CCDC58	coiled-coil domain containing 58 (CCDC58), mRNA.	NM_001017928.2	-1.53	3.39	-1.3	2.64	-2.16	17.39	-1.86	13.75	0.3	0.14	0.23	0.04
ILMN_1786125	CCNA2	cyclin A2 (CCNA2), mRNA.	NM_001237.2	-0.93	4.87	-1.32	8.39	-1.16	10.01	-1.67	18.16	-0.5	1.12	-0.39	0.41
ILMN_1778625	CD44	CD44 molecule (Indian blood group) (CD44), transcript variant 1, mRNA.	NM_000610.3	-1.01	1.12	-2.32	5.15	-0.61	1.13	-1.37	5.74	-0.76	0.94	-1.31	0.96
ILMN_1800540	CD55	CD55 molecule, decay accelerating factor for complement (Cromer blood group) (CD55), mRNA.	NM_000574.2	-0.51	1.02	-2.02	10.27	-0.58	2.27	-1.27	10.16	-0.7	2.1	-1.51	5.31
ILMN_2366212	CD79B	CD79b molecule, immunoglobulin-associated beta (CD79B), transcript variant 3, mRNA.	NM_001039933.1	-1.27	6.75	-1.28	6.93	-1.3	10.55	-1.08	7.67	0.22	0.11	-0.01	0
ILMN_1711005	CDC25A	cell division cycle 25 homolog A (S. pombe) (CDC25A), transcript variant 1, mRNA.	NM_001789.2	-0.38	1.05	-1.2	7.81	-0.91	3.86	-1.77	12.91	-0.86	2.25	-0.82	3.04
ILMN_2349138	CDC42SE1	CDC42 small effector 1 (CDC42SE1), transcript variant 1, mRNA.	NM_001038707.1	-1.02	2.51	-1.36	4.29	-1.12	6.67	-0.96	4.99	0.16	0.05	-0.34	0.11
ILMN_1660654	CDCA2	cell division cycle associated 2 (CDCA2), mRNA.	NM_152562.2	-1.05	4.95	-0.97	4.49	-1.36	8.74	-1.41	9.42	-0.06	0.01	0.08	0.02
ILMN_1779228	CDH2	cadherin 2, type 1, N-cadherin (neuronal) (CDH2), mRNA.	NM_001792.2	-1.28	11.86	-1.36	12.76	-1.47	13.8	-1.2	9.77	0.27	0.2	-0.08	0.03
ILMN_1670769	CENPQ	centromere protein Q (CENPQ), mRNA.	NM_018132.3	-1.37	5.34	-1.73	7.78	-1.39	7.53	-1.86	12.53	-0.47	0.37	-0.37	0.16
ILMN_1747016	CEP55	centrosomal protein 55kDa (CEP55), mRNA.	NM_018131.3	-0.88	3.97	-1.15	6.2	-1.03	5.69	-1.12	6.54	-0.08	0.02	-0.26	0.14
ILMN_1676588	CEPT1	choline/ethanolamine phosphotransferase 1 (CEPT1), transcript variant 2, mRNA.	NM_001007794.1	-0.94	1.31	-1.31	2.55	-1.8	10.93	-1.79	10.9	0.01	0	-0.37	0.07
ILMN_2266309	CEPT1	choline/ethanolamine phosphotransferase 1 (CEPT1), transcript variant 1, mRNA.	NM_006090.3	-1.36	1.63	-1.52	2.11	-1.67	7.6	-1.31	4.88	0.36	0.12	-0.16	0.02
ILMN_2356838	CEPT1	choline/ethanolamine phosphotransferase 1 (CEPT1), transcript variant 1, mRNA.	NM_006090.3	-1	2.03	-1.41	3.9	-1.69	11.25	-1.59	10.2	0.1	0.02	-0.41	0.13
ILMN_2224031	CETN3	centrin, EF-hand protein, 3 (CDC31 homolog, yeast) (CETN3), mRNA.	NM_004365.2	-1.49	3.61	-1.65	4.43	-1.73	12.18	-1.83	13.49	-0.11	0.02	-0.16	0.02
ILMN_1739241	CHAC1	ChaC, cation transport regulator homolog 1 (E. coli) (CHAC1), mRNA.	NM_024111.2	-0.98	2.58	-1.91	7.78	-1.03	6.1	-0.76	3.39	0.27	0.15	-0.93	1.35
ILMN_1663092	CITED2	Cbp/p300-interacting transactivator, with Glu/Asp-rich carboxy-terminal domain, 2 (CITED2), mRNA.	NM_006079.3	-1.24	7.83	-1.45	9.83	0.98	6.89	-0.9	5.93	-1.88	17.59	-0.21	0.11
ILMN_1674411	CKAP2	cytoskeleton associated protein 2 (CKAP2), transcript variant 2, mRNA.	NM_001098525.1	-0.79	1.75	-1.08	3.19	-1.66	12.48	-1.71	13.17	-0.05	0.01	-0.29	0.09
ILMN_1751776	CKAP2L	cytoskeleton associated protein 2-like (CKAP2L), mRNA.	NM_152515.2	-1.02	4.89	-1.2	6.46	-0.63	2.19	-1.06	6.09	-0.43	0.44	-0.18	0.07
ILMN_1679727	CLK1	CDC-like kinase 1 (CLK1), mRNA.	NM_004071.2	-0.43	0.55	-1.38	4.84	-1.4	7.91	-1.72	11.36	-0.32	0.15	-0.96	1.48
ILMN_2292123	COL4A3BP	collagen, type IV, alpha 3 (Goodpasture antigen) binding protein (COL4A3BP), transcript variant 1, mRNA.	NM_005713.1	-1.26	5.71	-1.37	6.64	-1.15	7.69	-0.89	4.76	0.26	0.15	-0.11	0.03
ILMN_2375484	CPEB2	cytoplasmic polyadenylation element binding protein 2 (CPEB2), transcript variant A, mRNA.	NM_182646.1	-1.3	5.23	-1.16	4.48	-0.97	4.87	-1.1	6.2	-0.13	0.04	0.14	0.03
ILMN_1722025	CPEB4	cytoplasmic polyadenylation element binding protein 4 (CPEB4), mRNA.	NM_030627.1	-0.95	2.38	-1.1	3.2	-1	7.08	-0.8	4.61	0.21	0.1	-0.15	0.03
ILMN_1652024	CSNK1G3	casein kinase 1, gamma 3 (CSNK1G3), transcript variant 2, mRNA.	NM_001031812.2	-1.2	3.29	-1.04	2.63	-1.55	10.23	-1.56	10.29	-0.01	0	0.17	0.03
ILMN_2332267	CSNK1G3	casein kinase 1, gamma 3 (CSNK1G3), transcript variant 3, mRNA.	NM_001044722.1	-1.17	3.88	-1.24	4.41	-1.74	14.28	-1.34	9.27	0.39	0.35	-0.07	0.01
ILMN_1690880	CTAGE5	CTAGE family, member 5 (CTAGE5), transcript variant 4, mRNA.	NM_203356.1	-0.85	4.13	-1	5.52	-0.96	6.98	-1.05	8.25	-0.09	0.03	-0.15	0.06
ILMN_1665655	CTDSPL2	CTD (carboxy-terminal domain, RNA polymerase II, polypeptide A) small phosphatase like 2 (CTDSPL2), mRNA.	NM_016396.1	-1.17	3.95	-1.24	4.5	-1.19	6.02	-1.3	7.03	-0.1	0.02	-0.07	0.01
ILMN_2077758	CTDSPL2	CTD (carboxy-terminal domain, RNA polymerase II, polypeptide A) small phosphatase like 2 (CTDSPL2), mRNA.	NM_016396.2	-1.32	3.97	-1.44	4.73	-1.19	5.33	-1.14	4.95	0.04	0.01	-0.12	0.02
ILMN_1721901	CTNNAL1	catenin (cadherin-associated protein), alpha-like 1 (CTNNAL1), mRNA.	NM_003798.2	-1.04	3.87	-1	3.75	-1.64	11.89	-1.48	10.01	0.16	0.04	0.04	0.01
ILMN_2136446	CTNNAL1	catenin (cadherin-associated protein), alpha-like 1 (CTNNAL1), mRNA.	NM_003798.1	-1.43	7.14	-1.66	8.91	-1.61	12.35	-1.58	12.01	0.03	0	-0.22	0.08
ILMN_1783285	CTPS	CTP synthase (CTPS), mRNA.	NM_001905.1	-0.93	6.9	-1.01	7.97	-1.28	9.96	-1.19	8.81	0.09	0.02	-0.09	0.04
ILMN_2371458	CXCR7	chemokine (C-X-C motif) receptor 7 (CXCR7), transcript variant 1, mRNA.	NM_001047841.1	2.54	13.48	0.34	0.52	1.2	10.05	-0.1	0.11	-1.3	9.27	-2.2	9.55
ILMN_1703279	CXorf57	chromosome X open reading frame 57 (CXorf57), mRNA.	NM_018015.4	-0.81	3.29	-1.16	6.15	-1.4	15.37	-1.48	16.82	-0.08	0.02	-0.36	0.27
ILMN_1787251	DAAM1	dishevelled associated activator of morphogenesis 1 (DAAM1), mRNA.	NM_014992.1	0.12	0.07	-1.04	2.3	-0.95	4.02	-1.63	10.83	-0.68	1.14	-1.17	1.66
ILMN_1735499	DCBLD2	discoidin, CUB and LCCL domain containing 2 (DCBLD2), mRNA.	NM_080927.3	-1.33	2.78	-1.2	2.39	-2.36	13.88	-1.86	9.29	0.5	0.28	0.14	0.02
ILMN_2174127	DCBLD2	discoidin, CUB and LCCL domain containing 2 (DCBLD2), mRNA.	NM_080927.3	-1.25	7.31	-1.07	5.9	-1.67	14.73	-1.44	11.48	0.24	0.11	0.18	0.07
ILMN_1668507	DDAH1	dimethylarginine dimethylaminohydrolase 1 (DDAH1), mRNA.	NM_012137.2	-0.93	3.11	-1.11	4.41	-1.05	3.76	-0.97	3.29	0.07	0.01	-0.19	0.05
ILMN_1735461	DDX21	DEAD (Asp-Glu-Ala-Asp) box polypeptide 21 (DDX21), mRNA.	NM_004728.2	-1.26	3.06	-1.16	2.75	-2.05	12.31	-1.46	6.8	0.59	0.51	0.1	0.01
ILMN_1794392	DDX3X	DEAD (Asp-Glu-Ala-Asp) box polypeptide 3, X-linked (DDX3X), mRNA.	NM_001356.3	-0.72	1.38	-1.48	5.16	-1.92	11.92	-2.36	16.77	-0.44	0.27	-0.76	0.75
ILMN_1802819	DEPDC1	DEP domain containing 1 (DEPDC1), mRNA.	NM_017779.3	-1.71	6.43	-1.51	5.44	-2.02	16.65	-2.14	18.33	-0.12	0.03	0.2	0.05
ILMN_1695226	DIAPH3	diaphanous homolog 3 (Drosophila) (DIAPH3), transcript variant 2, mRNA.	NM_030932.3	-0.95	2.45	-1.07	3.14	-1.09	7.48	-0.76	3.78	0.33	0.28	-0.12	0.02
ILMN_2275533	DIAPH3	diaphanous homolog 3 (Drosophila) (DIAPH3), transcript variant 1, mRNA.	NM_001042517.1	-1.37	5.61	-1.45	6.25	-1.02	8.03	-0.89	6.29	0.13	0.05	-0.08	0.02
ILMN_1874530	DIAPH3	diaphanous homolog 3 (Drosophila) (DIAPH3), transcript variant 1, mRNA.	NM_001042517.1	-1.27	6.27	-1.31	6.73	-1.27	9.63	-1.05	6.82	0.22	0.11	-0.04	0.01
ILMN_1749829	DLG7	discs, large homolog 7 (Drosophila) (DLG7), mRNA.	NM_014750.3	-0.98	3.48	-1.22	5.16	-0.81	4.32	-1.25	9.59	-0.44	0.58	-0.24	0.08
ILMN_1672094	DLX1	distal-less homeobox 1 (DLX1), transcript variant 1, mRNA.	NM_178120.4	-0.13	0.19	-1.18	8.85	-0.98	8.78	-1.38	15.8	-0.41	0.8	-1.05	5.94
ILMN_1750075	DMTF1	cyclin D binding myb-like transcription factor 1 (DMTF1), mRNA.	NM_021145.2	-0.98	4.1	-1.11	5.1	-1.72	16.76	-1.92	19.92	-0.2	0.09	-0.12	0.03
ILMN_1773742	DNAJB9	DnaJ (Hsp40) homolog, subfamily B, member 9 (DNAJB9), mRNA.	NM_012328.1	-0.98	5.12	-1.53	9.91	-1.11	10.4	-1.75	21.55	-0.64	2.44	-0.55	0.96
ILMN_1752455	DOCK5	dedicator of cytokinesis 5 (DOCK5), mRNA.	NM_024940.6	-0.92	4.3	-1.05	5.41	-1.27	11.84	-1.16	10.16	0.11	0.04	-0.12	0.04
ILMN_1795715	DPYD	dihydropyrimidine dehydrogenase (DPYD), mRNA.	NM_000110.3	-0.98	3.82	-1.03	4.24	-1.09	7.55	-0.84	4.66	0.25	0.14	-0.04	0.01
ILMN_2396020	DUSP6	dual specificity phosphatase 6 (DUSP6), transcript variant 2, mRNA.	NM_022652.2	-0.16	0.07	-2.42	6.26	0.4	0.42	-0.81	1.73	-1.22	2.53	-2.26	4.17
ILMN_1677466	DUSP6	dual specificity phosphatase 6 (DUSP6), transcript variant 1, mRNA.	NM_001946.2	0.16	0.07	-1.54	3.11	0.61	1.6	-0.51	1.15	-1.12	3.86	-1.7	2.41
ILMN_1669502	E2F3	E2F transcription factor 3 (E2F3), mRNA.	NM_001949.2	-0.99	5.27	-1.52	9.97	-1.12	10.25	-1.08	9.65	0.04	0.01	-0.53	0.9
ILMN_1798210	E2F7	E2F transcription factor 7 (E2F7), mRNA.	NM_203394.2	-1.46	5.64	-2	9.09	-1.83	14.9	-2.35	21.99	-0.52	0.67	-0.54	0.38
ILMN_1698673	EFCAB7	EF-hand calcium binding domain 7 (EFCAB7), mRNA.	NM_032437.1	-0.98	4.06	-1.01	4.4	-0.92	5.05	-1.12	7.31	-0.2	0.08	-0.03	0.01
ILMN_1762899	EGR1	early growth response 1 (EGR1), mRNA.	NM_001964.2	-0.83	0.86	-2.39	5.89	0.05	0.03	-1.15	4.35	-1.21	3.3	-1.56	1.76
ILMN_1779147	ENC1	ectodermal-neural cortex (with BTB-like domain) (ENC1), mRNA.	NM_003633.1	-0.32	0.23	-1.77	4.95	-0.74	2.53	-1.05	4.97	-0.31	0.15	-1.45	2.32
ILMN_1739222	ETV5	ets variant gene 5 (ets-related molecule) (ETV5), mRNA.	NM_004454.1	-2.16	14.31	-2.21	14.68	-1.43	7.57	-1.44	7.71	-0.01	0	-0.06	0.01
ILMN_1673721	EXO1	exonuclease 1 (EXO1), transcript variant 1, mRNA.	NM_006027.3	-1.05	6.84	-1.12	7.6	-1.01	7.93	-1.18	10.37	-0.17	0.07	-0.07	0.02
ILMN_1756162	EXOSC8	exosome component 8 (EXOSC8), mRNA.	NM_181503.1	-1.01	4.54	-1.01	4.62	-1.04	8.39	-1	7.88	0.04	0.01	0.01	0
ILMN_1712066	EXPH5	exophilin 5 (EXPH5), mRNA.	NM_015065.1	-2.02	11.49	-1.83	10.17	-1.51	6.05	-1.4	5.26	0.11	0.01	0.19	0.06
ILMN_2388425	EXTL2	exostoses (multiple)-like 2 (EXTL2), transcript variant 2, mRNA.	NM_001033025.1	-1.04	2.17	-1.1	2.48	-1.17	6.2	-1.07	5.27	0.1	0.02	-0.05	0.01
ILMN_1758672	FAM107B	family with sequence similarity 107, member B (FAM107B), mRNA.	NM_031453.2	-1.83	6.43	-2.07	7.77	-1.06	7.94	-1.26	10.81	-0.2	0.1	-0.23	0.05
ILMN_1776905	FAM23B	family with sequence similarity 23, member B (FAM23B), mRNA.	NM_001013629.1	-0.84	5.7	-1.15	9.08	-1.3	12.81	-0.9	6.72	0.4	0.65	-0.3	0.36
ILMN_1761594	FAM35A	family with sequence similarity 35, member A (FAM35A), mRNA.	NM_019054.2	-0.63	1.42	-1.2	4.66	-0.79	2.87	-1.06	5.09	-0.27	0.11	-0.57	0.51
ILMN_1777322	FAM91A1	family with sequence similarity 91, member A1 (FAM91A1), mRNA.	NM_144963.2	-1.15	9.17	-1.12	8.94	-1	11.31	-0.85	8.47	0.15	0.1	0.03	0.01
ILMN_1698252	FANCB	Fanconi anemia, complementation group B (FANCB), transcript variant 2, mRNA.	NM_152633.2	-1.06	5.21	-1.37	7.73	-1.14	9.38	-0.83	5.29	0.31	0.29	-0.3	0.18
ILMN_1794187	FBXL3	F-box and leucine-rich repeat protein 3 (FBXL3), mRNA.	NM_012158.1	-0.7	2.62	-1.14	6.08	-0.62	2.58	-1.13	7.96	-0.5	0.83	-0.44	0.46
ILMN_1700232	FBXO30	F-box protein 30 (FBXO30), mRNA.	NM_032145.4	-0.68	1.53	-1	3.21	-1.29	8.28	-1.57	11.59	-0.28	0.14	-0.32	0.12
ILMN_1710676	FBXO5	F-box protein 5 (FBXO5), mRNA.	NM_012177.2	-1.09	4.93	-1.62	9.02	-0.53	2.66	-1.34	14.63	-0.81	4.46	-0.53	0.61
ILMN_1703330	FEM1C	fem-1 homolog c (C. elegans) (FEM1C), mRNA.	NM_020177.2	-0.81	3	-1.58	8.8	-0.74	5.75	-1.23	14.12	-0.49	1.56	-0.77	1.69
ILMN_2389114	FIGNL1	fidgetin-like 1 (FIGNL1), transcript variant 1, mRNA.	NM_001042762.1	-1.18	2.28	-1.52	3.67	-1.76	8.54	-1.95	10.2	-0.19	0.04	-0.33	0.07
ILMN_1778152	FIGNL1	fidgetin-like 1 (FIGNL1), transcript variant 1, mRNA.	NM_001042762.1	-0.98	2.68	-1.34	4.78	-1.28	5.91	-1.59	8.81	-0.31	0.12	-0.37	0.14
ILMN_1814573	FLJ11171	hypothetical protein FLJ11171 (FLJ11171), transcript variant 1, mRNA.	NM_018348.5	-0.94	3.13	-1.61	7.53	-1.44	12.91	-1.67	16.49	-0.23	0.13	-0.66	0.82
ILMN_1805665	FLRT3	fibronectin leucine rich transmembrane protein 3 (FLRT3), transcript variant 2, mRNA.	NM_198391.1	1.12	3.56	-1.65	6.78	0.77	5.73	-1.4	16.08	-2.18	27.13	-2.77	11.42
ILMN_1669523	FOS	v-fos FBJ murine osteosarcoma viral oncogene homolog (FOS), mRNA.	NM_005252.2	-0.73	2.01	-1.04	3.9	-0.89	7.04	-1.3	13.74	-0.42	0.8	-0.31	0.13
ILMN_1736510	FOXN2	forkhead box N2 (FOXN2), mRNA.	NM_002158.3	-1.35	6.19	-1.03	4.11	-0.99	5.42	-1.25	8.32	-0.26	0.13	0.32	0.16
ILMN_1788213	FRAT2	frequently rearranged in advanced T-cell lymphomas 2 (FRAT2), mRNA.	NM_012083.2	-0.5	2.46	-1.45	12.63	0.24	0.93	-1.68	30.78	-1.92	32.92	-0.95	5.68
ILMN_1792072	FUT4	fucosyltransferase 4 (alpha (1,3) fucosyltransferase, myeloid-specific) (FUT4), mRNA.	NM_002033.2	-0.23	0.19	-1.38	4.48	-0.45	1.9	-1.01	9.14	-0.56	1.91	-1.15	2.07
ILMN_1804351	FZD7	frizzled homolog 7 (Drosophila) (FZD7), mRNA.	NM_003507.1	-0.32	0.62	-1.24	7.11	-1.71	16.51	-1.78	17.74	-0.07	0.02	-0.92	3.16
ILMN_1704398	FZD9	frizzled homolog 9 (Drosophila) (FZD9), mRNA.	NM_003508.2	-1.04	9.28	-1.18	11.07	-0.82	9.48	-1.06	14.7	-0.24	0.37	-0.14	0.1
ILMN_2381753	G3BP2	GTPase activating protein (SH3 domain) binding protein 2 (G3BP2), transcript variant 3, mRNA.	NM_203504.1	-0.85	3.65	-1.32	7.45	-1.62	14.2	-1.41	11.16	0.22	0.1	-0.47	0.53
ILMN_2381758	G3BP2	GTPase activating protein (SH3 domain) binding protein 2 (G3BP2), transcript variant 3, mRNA.	NM_203504.1	-1.05	2.39	-1.5	4.59	-2.15	13.01	-2.12	12.75	0.03	0	-0.45	0.16
ILMN_1720422	G3BP2	GTPase activating protein (SH3 domain) binding protein 2 (G3BP2), transcript variant 3, mRNA.	NM_203504.1	-0.68	1.93	-1.21	5.44	-1.65	10.03	-1.66	10.23	-0.02	0	-0.53	0.54
ILMN_1803977	GALNT1	UDP-N-acetyl-alpha-D-galactosamine:polypeptide N-acetylgalactosaminyltransferase 1 (GalNAc-T1) (GALNT1), mRNA.	NM_020474.2	-0.75	4.26	-1.14	8.25	-1.12	9.28	-1.04	8.25	0.07	0.02	-0.39	0.58
ILMN_1795344	GOLPH4	golgi phosphoprotein 4 (GOLPH4), mRNA.	NM_014498.2	-2.12	7.33	-2.07	7.23	-1.13	4.5	-0.92	3.08	0.2	0.05	0.04	0.01
ILMN_1767837	GOLT1B	golgi transport 1 homolog B (S. cerevisiae) (GOLT1B), mRNA.	NM_016072.3	-0.86	1.91	-1.26	3.95	-0.64	1.24	-1.17	4.2	-0.53	0.35	-0.4	0.15
ILMN_1758213	GPAM	glycerol-3-phosphate acyltransferase, mitochondrial (GPAM), nuclear gene encoding mitochondrial protein, mRNA.	NM_020918.3	-1.3	7.02	-1.08	5.4	-1.89	25.56	-1.88	25.38	0.01	0	0.22	0.1
ILMN_1721138	GRPEL2	GrpE-like 2, mitochondrial (E. coli) (GRPEL2), nuclear gene encoding mitochondrial protein, mRNA.	NM_152407.3	-1.15	6.24	-0.94	4.6	-1.49	23.02	-1.15	15.45	0.34	0.81	0.22	0.1
ILMN_1739497	GTF2H5	general transcription factor IIH, polypeptide 5 (GTF2H5), mRNA.	NM_207118.1	-0.7	0.87	-1.12	2.24	-1.76	11.48	-1.46	8.34	0.3	0.12	-0.43	0.11
ILMN_1725244	HAT1	histone acetyltransferase 1 (HAT1), transcript variant 1, mRNA.	NM_003642.2	-1.13	2.61	-1.47	4.28	-1.19	6.41	-1	4.69	0.18	0.05	-0.34	0.09
ILMN_1693905	HAT1	histone acetyltransferase 1 (HAT1), transcript variant 1, mRNA.	NM_003642.2	-1.59	2.23	-1.91	3.23	-1.83	5.63	-1.84	5.72	-0.02	0	-0.32	0.04
ILMN_1681283	HIF1A	hypoxia-inducible factor 1, alpha subunit (basic helix-loop-helix transcription factor) (HIF1A), transcript variant 1, mRNA.	NM_001530.2	-1.34	7.5	-1.1	5.68	-1.04	6.41	-1.2	8.27	-0.16	0.05	0.24	0.11
ILMN_1763260	HIF1A	hypoxia-inducible factor 1, alpha subunit (basic helix-loop-helix transcription factor) (HIF1A), transcript variant 1, mRNA.	NM_001530.2	-1.01	2.46	-1.21	3.55	-1.29	8.11	-1.32	8.39	-0.02	0	-0.21	0.05
ILMN_1661799	HIGD1A	HIG1 domain family, member 1A (HIGD1A), transcript variant 1, mRNA.	NM_001099668.1	-0.94	1.01	-1.34	2.08	-1.89	8.96	-1.7	7.46	0.19	0.04	-0.4	0.07
ILMN_1692831	HIST1H1A	histone 1, H1a (HIST1H1A), mRNA.	NM_005325.2	-1.55	8.71	-1.48	8.24	-1.75	17	-1.98	20.63	-0.23	0.12	0.08	0.02
ILMN_1654268	HMGB2	high-mobility group box 2 (HMGB2), mRNA.	NM_002129.2	-1.06	5.92	-1.16	6.86	-0.73	5.22	-1.09	10.59	-0.35	0.55	-0.09	0.03
ILMN_1733519	HMGB3	high-mobility group box 3 (HMGB3), mRNA.	NM_005342.2	-0.38	0.56	-1.45	6.22	-1.18	9.37	-1.83	19.13	-0.64	1.83	-1.06	2.53
ILMN_1781942	HMMR	hyaluronan-mediated motility receptor (RHAMM) (HMMR), transcript variant 2, mRNA.	NM_012485.1	-0.79	4.02	-1.1	6.94	-1.46	11.63	-1.58	13.26	-0.12	0.03	-0.31	0.26
ILMN_2351466	HNT	neurotrimin (HNT), transcript variant 2, mRNA.	NM_001048209.1	-1.44	8.4	-1.4	8.16	-1.35	9.1	-1.26	8.02	0.09	0.02	0.04	0.01
ILMN_1902308		AGENCOURT_13567612 NIH_MGC_184 cDNA clone IMAGE:30326575 5, mRNA sequence		0.24	0.11	-2.27	5.08	0.54	1.51	-0.82	3.6	-1.36	7.15	-2.51	4.44
ILMN_1824362		BX105338 Soares_pregnant_uterus_NbHPU cDNA clone IMAGp998C114347, mRNA sequence		-0.72	0.64	-2.02	4.41	0.34	0.46	-1.26	6.27	-1.59	7.59	-1.31	1.06
ILMN_1855278		EST366269 MAGE resequences, MAGC cDNA, mRNA sequence		-0.09	0.04	-1.55	3.99	0.66	1.69	-0.51	1.02	-1.17	3.76	-1.46	2.36
ILMN_1903914		cDNA FLJ26188 fis, clone ADG04821		-0.27	0.14	-1.71	3.67	0.3	0.35	-0.77	2.29	-1.08	2.97	-1.44	1.6
ILMN_1889752		mRNA full length insert cDNA clone EUROIMAGE 966164		-0.49	0.66	-1.05	2.87	-1.28	8.74	-1.39	10.16	-0.11	0.03	-0.56	0.33
ILMN_1869897		cDNA clone IMAGE:5297467		-0.93	1.26	-1.4	2.8	-2.05	13.45	-1.99	12.86	0.06	0.01	-0.46	0.11
ILMN_1827840		AGENCOURT_6795541 NIH_MGC_47 cDNA clone IMAGE:5802062 5, mRNA sequence		-1.53	8.12	-0.91	3.71	-1.48	10.01	-1.04	5.3	0.44	0.39	0.62	0.92
ILMN_1857067		BX113978 Soares_pregnant_uterus_NbHPU cDNA clone IMAGp998N131206, mRNA sequence		-1.17	4.49	-0.89	2.93	-1.25	9.31	-0.55	1.98	0.7	1.95	0.28	0.1
ILMN_1816174		cDNA clone IMAGE:5261489		-0.82	2.75	-1.03	4.22	-1	8.25	-1.02	8.51	-0.02	0	-0.21	0.07
ILMN_1816342		full-length cDNA clone XCL0BB001ZD04 of Neuroblastoma of (human)		-1.59	3.97	-1.75	4.78	-1.09	4.13	-0.96	3.27	0.12	0.02	-0.16	0.02
ILMN_1886493		cDNA: FLJ22720 fis, clone HSI14320		-1.15	3.44	-1.65	6.42	-1	6	-1.41	11.06	-0.41	0.44	-0.51	0.29
ILMN_1838313		cDNA clone IMAGE:5260685		-0.94	4.21	-1.08	5.45	-1	8.44	-1.11	10.1	-0.11	0.04	-0.14	0.05
ILMN_1819384		AGENCOURT_14535501 NIH_MGC_191 cDNA clone IMAGE:30415823 5, mRNA sequence		-1.14	2.65	-1.65	5.16	-1.14	4.1	-1.67	8.25	-0.52	0.35	-0.51	0.21
ILMN_1904521		zx74f04.s1 Soares ovary tumor NbHOT cDNA clone IMAGE:809503 3 similar to contains element LTR7 repetitive element ;, mRNA sequence		-0.81	1.56	-1.3	3.82	0.53	0.71	-0.78	1.61	-1.31	3.06	-0.49	0.21
ILMN_1910893		AGENCOURT_6469652 NIH_MGC_92 cDNA clone IMAGE:5576382 5, mRNA sequence		-1.24	6.1	-1.17	5.66	-1.65	15.78	-1.59	14.97	0.06	0.01	0.07	0.02
ILMN_1828967		cDNA FLJ12023 fis, clone HEMBB1001785		-1.01	4.24	-0.75	2.62	-0.93	8.02	-1.29	14.02	-0.36	0.56	0.26	0.11
ILMN_1829845		AV737317 CB cDNA clone CBCAQH03 5, mRNA sequence		-0.64	0.37	-2.49	4.55	-0.36	0.86	-2.13	23.27	-1.77	14.95	-1.86	1.62
ILMN_1885165		mRNA; cDNA DKFZp686J12188 (from clone DKFZp686J12188)		-1.2	2.19	-1.21	2.32	-1.81	10.29	-1.82	10.3	0	0	-0.01	0
ILMN_1847313		nw06a01.s1 NCI_CGAP_SS1 cDNA clone IMAGE:1238472 3 similar to TR:O10385 O10385 PRO-POL-DUTPASE POLYPROTEIN ;, mRNA sequence		-1.21	5.14	-0.91	3.31	-1.21	12.72	-0.98	8.97	0.22	0.18	0.3	0.13
ILMN_1712475	HS3ST2	heparan sulfate (glucosamine) 3-O-sulfotransferase 2 (HS3ST2), mRNA.	NM_006043.1	-0.66	2.7	-1.77	12.27	-1.69	19.93	-1.38	14.56	0.31	0.35	-1.11	5.02
ILMN_1691097	HSP90AA1	heat shock protein 90kDa alpha (cytosolic), class A member 1 (HSP90AA1), transcript variant 1, mRNA.	NM_001017963.2	-0.98	1.87	-1.09	2.38	-1.76	10.59	-1.3	6.16	0.46	0.32	-0.11	0.02
ILMN_1766713	HSPD1	heat shock 60kDa protein 1 (chaperonin) (HSPD1), nuclear gene encoding mitochondrial protein, transcript variant 1, mRNA.	NM_002156.4	-1.43	10.29	-1.37	9.79	-1.32	14.38	-1.17	11.73	0.15	0.07	0.06	0.02
ILMN_1712888	HSPH1	heat shock 105kDa/110kDa protein 1 (HSPH1), mRNA.	NM_006644.2	-1.08	7.03	-1.41	10.31	-1.12	9.69	-1.03	8.4	0.09	0.03	-0.33	0.35
ILMN_2086095	ID2	inhibitor of DNA binding 2, dominant negative helix-loop-helix protein (ID2), mRNA.	NM_002166.4	-0.77	2.23	-1.48	6.75	1.52	12.01	-0.4	0.9	-1.92	14.85	-0.7	0.97
ILMN_1739428	IFIT2	interferon-induced protein with tetratricopeptide repeats 2 (IFIT2), mRNA.	NM_001547.4	-1.3	5.4	-1.81	8.94	-0.79	4.4	-1.91	20.05	-1.11	6.35	-0.51	0.41
ILMN_1758811	IMPA1	inositol(myo)-1(or 4)-monophosphatase 1 (IMPA1), mRNA.	NM_005536.2	-1.16	6.28	-0.75	3.15	-1.1	9.6	-0.77	5.07	0.33	0.37	0.41	0.41
ILMN_1814282	ISG20L1	interferon stimulated exonuclease gene 20kDa-like 1 (ISG20L1), mRNA.	NM_022767.2	0.21	0.2	-0.94	3.05	-0.03	0.02	-1.04	4.31	-1	2.71	-1.15	2.97
ILMN_1763390	ISL1	ISL1 transcription factor, LIM/homeodomain, (islet-1) (ISL1), mRNA.	NM_002202.1	-0.9	8.63	-1.25	13.21	-0.41	1.71	-1.3	15.05	-0.89	6.1	-0.35	0.96
ILMN_2169439	ITGAV	integrin, alpha V (vitronectin receptor, alpha polypeptide, antigen CD51) (ITGAV), mRNA.	NM_002210.2	-1	1.4	-1.51	3.15	-2.08	9.24	-1.76	6.86	0.32	0.08	-0.52	0.14
ILMN_1723467	ITGB1	integrin, beta 1 (fibronectin receptor, beta polypeptide, antigen CD29 includes MDF2, MSK12) (ITGB1), transcript variant 1A, mRNA.	NM_002211.2	-0.93	6.33	-1.19	9.22	-1.09	12.74	-0.94	9.92	0.15	0.09	-0.27	0.25
ILMN_2397750	IVNS1ABP	influenza virus NS1A binding protein (IVNS1ABP), mRNA.	NM_006469.4	0.49	0.43	-1.1	2.01	-1.13	6.07	-1.17	6.43	-0.04	0.01	-1.59	2.55
ILMN_2410742	JMJD1C	jumonji domain containing 1C (JMJD1C), transcript variant 1, mRNA.	NM_032776.1	-0.87	1.26	-1.35	2.99	-1.63	10.01	-1.51	8.71	0.13	0.03	-0.48	0.14
ILMN_2198393	KATNA1	katanin p60 (ATPase-containing) subunit A 1 (KATNA1), mRNA.	NM_007044.2	-0.87	5.38	-1.22	9.02	-0.76	6.92	-1.09	12.95	-0.33	0.61	-0.35	0.44
ILMN_1716272	KBTBD8	kelch repeat and BTB (POZ) domain containing 8 (KBTBD8), mRNA.	NM_032505.1	-1.36	9.41	-1.24	8.33	-1.11	8.73	-1.14	9.16	-0.03	0.01	0.13	0.05
ILMN_1712505	KDELC1	KDEL (Lys-Asp-Glu-Leu) containing 1 (KDELC1), mRNA.	NM_024089.1	-0.96	7.67	-1.01	8.43	-0.72	4.46	-1.01	8.23	-0.28	0.26	-0.06	0.02
ILMN_1745813	KIAA1279	KIAA1279 (KIAA1279), mRNA.	NM_015634.2	-0.9	5.35	-1.23	8.61	-1.19	13.09	-1.52	19.47	-0.33	0.52	-0.33	0.33
ILMN_1701111	KIAA1434	hypothetical protein KIAA1434 (KIAA1434), mRNA.	NM_019593.3	-1.04	6.87	-1.11	7.66	-1.29	11.35	-1.04	7.78	0.25	0.17	-0.07	0.02
ILMN_1803254	KIAA2010	KIAA2010 (KIAA2010), transcript variant 1, mRNA.	NM_032560.3	-0.79	1.59	-1.28	3.97	-1.7	9.17	-1.43	6.75	0.27	0.08	-0.49	0.24
ILMN_1753063	KIF15	kinesin family member 15 (KIF15), mRNA.	NM_020242.1	-1.32	7.36	-1.1	5.7	-0.98	7.04	-1.07	8.25	-0.09	0.02	0.22	0.1
ILMN_2137789	KLF4	Kruppel-like factor 4 (gut) (KLF4), mRNA.	NM_004235.3	-1.14	3.93	-1.99	9.35	-1.62	16.8	-2.04	23.84	-0.42	0.63	-0.85	1.37
ILMN_1664466	KLHL9	kelch-like 9 (Drosophila) (KLHL9), mRNA.	NM_018847.2	0.29	0.56	-0.79	3.64	0.51	2.45	-0.66	4.02	-1.17	9.24	-1.08	4.54
ILMN_1708427	KPNA3	karyopherin alpha 3 (importin alpha 4) (KPNA3), mRNA.	NM_002267.2	-1.19	4.03	-1.52	6.08	-1.75	11.24	-1.64	10.1	0.11	0.02	-0.32	0.12
ILMN_1706519	LAMC2	laminin, gamma 2 (LAMC2), transcript variant 2, mRNA.	NM_018891.1	-0.1	0.04	-2.33	5.38	-0.62	1.85	-1.08	5.49	-0.46	0.42	-2.23	3.61
ILMN_1667577	LCMT2	leucine carboxyl methyltransferase 2 (LCMT2), mRNA.	NM_014793.3	0.08	0.07	-1.42	7.56	-0.12	0.19	-1.53	20.07	-1.41	14.95	-1.5	6.56
ILMN_1727361	LEMD3	LEM domain containing 3 (LEMD3), mRNA.	NM_014319.3	-0.48	0.96	-1.24	5.41	-1.37	11.84	-1.44	12.98	-0.08	0.02	-0.76	1.29
ILMN_1658266	LOC146053	PREDICTED: similar to ribosomal protein S3a, transcript variant 4 (LOC146053), mRNA.	XM_933251.1	-1.39	10.72	-1.33	10.16	-1.3	17.95	-1.34	18.78	-0.03	0.01	0.06	0.02
ILMN_1666384	LOC151579	PREDICTED: similar to basic leucine zipper and W2 domains 1 (LOC151579), mRNA.	XM_045290.6	-0.99	3.34	-1.67	7.77	-1.37	7.12	-1.26	6.11	0.11	0.02	-0.67	0.82
ILMN_1666477	LOC390876	PREDICTED: similar to 60S ribosomal protein L35 (LOC390876), mRNA.	XM_372704.4	-1.18	6.72	-0.89	4.4	-1.12	6.58	-0.98	5.13	0.14	0.04	0.29	0.19
ILMN_1718997	LOC390956	PREDICTED: similar to peptidyl-Pro cis trans isomerase (LOC390956), mRNA.	XM_372741.4	-1.36	8.51	-0.99	5.42	-1.23	16.79	-1.26	17.56	-0.03	0.01	0.37	0.35
ILMN_1775473	LOC400652	PREDICTED: similar to 40S ribosomal protein S3a, transcript variant 1 (LOC400652), mRNA.	XM_375543.3	-1.37	12.25	-1.59	14.5	-1.12	8.91	-0.79	4.69	0.33	0.33	-0.22	0.19
ILMN_1669233	LOC401677	PREDICTED: similar to eukaryotic translation elongation factor 1 alpha 2 (LOC401677), mRNA.	XM_941301.1	-1.27	8.06	-1.3	8.47	-1.44	18.83	-1.12	12.67	0.32	0.52	-0.03	0.01
ILMN_2407235	LOC402057	similar to 40S ribosomal protein S17 (LOC402057), mRNA.	NM_001080499.1	-1.9	9.67	-2.11	11.09	-1.47	8.64	-1.38	7.71	0.09	0.02	-0.2	0.06
ILMN_1690638	LOC402677	PREDICTED: similar to 40S ribosomal protein S3a (V-fos transformation effector protein), transcript variant 3 (LOC402677), mRNA.	XM_943039.1	-1.62	13.36	-1.81	15.05	-1.36	11.95	-1.43	12.99	-0.07	0.02	-0.19	0.11
ILMN_2061979	LOC440093	histone H3-like (LOC440093), mRNA.	NM_001013699.1	-1.41	13.88	-1.49	14.7	-1.05	10.43	-1.19	12.88	-0.14	0.07	-0.08	0.04
ILMN_1701112	LOC440944	PREDICTED: hypothetical gene supported by AK128398 (LOC440944), misc RNA.	XR_017949.1	-1.05	8.2	-1.23	10.24	-0.83	6.86	-1.01	9.65	-0.17	0.11	-0.18	0.11
ILMN_1716601	LOC441032	PREDICTED: similar to eukaryotic translation elongation factor 1 alpha 1, transcript variant 11 (LOC441032), mRNA.	XM_933495.1	-1.74	7.73	-1.96	9.24	-1.54	13.11	-1.91	18.64	-0.37	0.36	-0.22	0.06
ILMN_1664955	LOC642109	PREDICTED: similar to FRG1 protein (FSHD region gene 1 protein) (LOC642109), mRNA.	XM_936248.1	-1.24	4.97	-1.28	5.36	-0.51	2.39	-1.14	10.78	-0.63	2.33	-0.04	0.01
ILMN_1665630	LOC643872	PREDICTED: similar to Nonhistone chromosomal protein HMG-17 (High-mobility group nucleosome-binding domain-containing protein 2), transcript variant 3 (LOC643872), mRNA.	XM_933938.2	-1.08	8.75	-0.97	7.67	-1.33	16.18	-1.19	13.62	0.14	0.07	0.11	0.05
ILMN_1675472	LOC644799	PREDICTED: hypothetical protein LOC644799, transcript variant 1 (LOC644799), mRNA.	XM_934554.1	-0.82	0.91	-1.38	2.5	-1.59	7.18	-1.54	6.83	0.04	0.01	-0.55	0.14
ILMN_1811193	LOC645289	PREDICTED: similar to CG33096-PA, isoform A (LOC645289), mRNA.	XM_928333.1	-1.34	10.01	-1.25	9.22	-0.96	6.65	-1.01	7.33	-0.05	0.01	0.09	0.03
ILMN_1753692	LOC647135	PREDICTED: similar to SLIT-ROBO Rho GTPase-activating protein 2 (srGAP2) (Formin-binding protein 2), transcript variant 1 (LOC647135), mRNA.	XM_930578.2	-1.25	6.29	-1.34	7.14	-0.28	0.47	-1.31	9.62	-1.03	4.56	-0.09	0.02
ILMN_1667813	LOC648000	PREDICTED: similar to 60S ribosomal protein L7, transcript variant 1 (LOC648000), mRNA.	XM_371757.5	-1.05	1.24	-1.33	2.03	-1.68	8.21	-1.36	5.59	0.32	0.1	-0.28	0.04
ILMN_1755910	LOC648366	PREDICTED: similar to SLIT-ROBO Rho GTPase-activating protein 2 (srGAP2) (Formin-binding protein 2) (LOC648366), mRNA.	XM_497707.2	-1.05	5.83	-0.96	5.12	-0.35	0.79	-1.28	9.87	-0.92	3.93	0.1	0.03
ILMN_1685985	LOC649150	PREDICTED: similar to eukaryotic translation elongation factor 1 alpha 2 (LOC649150), mRNA.	XR_019269.1	-2.03	8.71	-2.19	9.72	-1.92	19.09	-2	20.36	-0.08	0.02	-0.15	0.03
ILMN_1803799	LOC649555	PREDICTED: similar to eukaryotic translation initiation factor 4E, transcript variant 2 (LOC649555), mRNA.	XM_945579.1	-1.33	2.63	-1.58	3.67	-1.73	7.17	-1.44	5.13	0.29	0.07	-0.25	0.04
ILMN_1812236	LOC650739	PREDICTED: similar to ribosomal protein S12 (LOC650739), mRNA.	XR_019385.1	-1.82	12	-1.69	11.01	-1.69	21.67	-1.6	20.04	0.09	0.03	0.12	0.04
ILMN_1670800	LOC651745	PREDICTED: hypothetical protein LOC651745 (LOC651745), mRNA.	XM_944901.1	-1.11	6.98	-1.49	10.6	-1.41	17.35	-1.3	15.37	0.11	0.04	-0.38	0.45
ILMN_1660477	LOC652608	PREDICTED: similar to 60S ribosomal protein L6 (TAX-responsive enhancer element-binding protein 107) (TAXREB107) (Neoplasm-related protein C140) (LOC652608), mRNA.	XM_942140.1	-1.55	7.67	-1.81	9.66	-0.69	3.13	-1.03	6.77	-0.34	0.3	-0.26	0.11
ILMN_1658531	LOC653702	hCG31916 (LOC653702), mRNA.	NM_001093763.1	-1.59	3.17	-1.81	4.13	-1.19	3.79	-0.78	1.62	0.41	0.16	-0.23	0.03
ILMN_1701882	LOC653820	PREDICTED: similar to family with sequence similarity 72, member A, transcript variant 1 (LOC653820), mRNA.	XM_930579.2	-1.3	3.24	-1.94	6.39	-1.07	5.57	-1.59	11.21	-0.51	0.59	-0.64	0.33
ILMN_1749875	LOC728715	PREDICTED: similar to hCG38149 (LOC728715), mRNA.	XM_001128260.1	-1	6.66	-0.92	5.95	-1.75	24.25	-1.64	22.13	0.11	0.04	0.08	0.03
ILMN_1676848	LOC728844	PREDICTED: hypothetical LOC728844 (LOC728844), mRNA.	XM_001133058.1	-0.92	3.42	-1.4	6.88	-0.61	1.99	-1.27	8.11	-0.66	1.3	-0.48	0.42
ILMN_1754332	LOC85389	RNA, small nucleolar (LOC85389) on chromosome 11.	NR_001453.1	-0.65	2.15	-1.57	9.09	-0.74	2.61	-1.55	10.38	-0.8	1.92	-0.92	2.74
ILMN_1689294	LOC85390	RNA, small nucleolar (LOC85390) on chromosome 11.	NR_001454.1	-0.55	1.34	-1.5	7.62	-0.75	3.15	-1.31	9.06	-0.56	0.93	-0.95	2.47
ILMN_1677765	LRP8	low density lipoprotein receptor-related protein 8, apolipoprotein e receptor (LRP8), transcript variant 3, mRNA.	NM_017522.3	-1.04	4.59	-0.79	2.94	-1.42	10.69	-1.28	8.96	0.14	0.04	0.26	0.11
ILMN_1810593	LRRC7	leucine rich repeat containing 7 (LRRC7), mRNA.	NM_020794.2	-1.92	11.11	-2.08	12.29	-1.33	10.55	-1.24	9.37	0.09	0.02	-0.16	0.05
ILMN_1764362	LYAR	Ly1 antibody reactive homolog (mouse) (LYAR), mRNA.	NM_017816.1	-1.27	11.28	-1.24	10.94	-1.26	9.92	-1.26	9.87	0	0	0.03	0.01
ILMN_2147435	MAN2A1	mannosidase, alpha, class 2A, member 1 (MAN2A1), mRNA.	NM_002372.2	-0.86	3.02	-1.05	4.39	-1.6	13.01	-1.34	9.66	0.26	0.13	-0.19	0.06
ILMN_2408908	MAP4K5	mitogen-activated protein kinase kinase kinase kinase 5 (MAP4K5), transcript variant 1, mRNA.	NM_006575.3	-1.2	3.27	-1.51	4.95	-1.08	4.26	-1.08	4.27	0	0	-0.31	0.09
ILMN_1757287	MAPK6	mitogen-activated protein kinase 6 (MAPK6), mRNA.	NM_002748.2	-0.4	1.07	-1.25	7.89	-0.89	9.04	-1.11	13.17	-0.22	0.21	-0.85	3.07
ILMN_2411076	MATR3	matrin 3 (MATR3), transcript variant 1, mRNA.	NM_199189.1	-1.9	2.81	-1.8	2.64	-1.77	6.74	-1.41	4.42	0.36	0.09	0.11	0.01
ILMN_2313158	MBNL1	muscleblind-like (Drosophila) (MBNL1), transcript variant 5, mRNA.	NM_207295.1	-1.32	2.83	-1.53	3.8	-1.72	7.45	-1.45	5.41	0.27	0.06	-0.21	0.04
ILMN_2303166	MBNL3	muscleblind-like 3 (Drosophila) (MBNL3), transcript variant R, mRNA.	NM_133486.1	-1.03	2.26	-0.68	1.1	-1.11	3.54	-0.92	2.45	0.19	0.04	0.35	0.1
ILMN_1761808	MCFD2	multiple coagulation factor deficiency 2 (MCFD2), mRNA.	NM_139279.3	-0.76	3.61	-1.16	7.14	-1.14	11.17	-1.12	10.85	0.02	0	-0.39	0.43
ILMN_1658989	MEX3B	mex-3 homolog B (C. elegans) (MEX3B), mRNA.	NM_032246.3	-0.74	6.66	-1.07	11.09	-0.84	9.73	-1.18	16.95	-0.33	0.82	-0.33	0.8
ILMN_1788832	MIB1	mindbomb homolog 1 (Drosophila) (MIB1), mRNA.	NM_020774.2	-1.03	4.94	-0.92	4.19	-1.32	7.87	-1.42	8.99	-0.1	0.02	0.11	0.03
ILMN_1783702	MORC3	MORC family CW-type zinc finger 3 (MORC3), mRNA.	NM_015358.1	-0.79	1.88	-1.21	4.18	-0.96	6.66	-1.06	7.88	-0.09	0.02	-0.42	0.2
ILMN_1660222	MTBP	Mdm2, transformed 3T3 cell double minute 2, p53 binding protein (mouse) binding protein, 104kDa (MTBP), mRNA.	NM_022045.3	-1.39	4.85	-1.54	5.82	-1.51	13.07	-1.81	17.45	-0.29	0.2	-0.15	0.03
ILMN_2099249	MTERF	mitochondrial transcription termination factor (MTERF), nuclear gene encoding mitochondrial protein, mRNA.	NM_006980.3	-0.85	1.87	-1.36	4.46	-1.1	6.61	-1.64	13.31	-0.54	0.83	-0.51	0.27
ILMN_2405521	MTHFD2	methylenetetrahydrofolate dehydrogenase (NADP+ dependent) 2, methenyltetrahydrofolate cyclohydrolase (MTHFD2), nuclear gene encoding mitochondrial protein, transcript variant 2, mRNA.	NM_001040409.1	-1.03	5.05	-0.8	3.46	-1.11	6.03	-0.8	3.26	0.31	0.16	0.22	0.1
ILMN_1791478	MTPN	myotrophin (MTPN), mRNA.	NM_145808.2	-1.09	1.73	-1.16	2.03	-1.73	7.95	-1.26	4.4	0.47	0.23	-0.07	0.01
ILMN_2308849	MYADM	myeloid-associated differentiation marker (MYADM), transcript variant 4, mRNA.	NM_001020820.1	-0.35	0.87	-1.4	9.48	-1.2	15.05	-1.03	11.69	0.17	0.12	-1.05	4.81
ILMN_1699208	NAP1L1	nucleosome assembly protein 1-like 1 (NAP1L1), transcript variant 1, mRNA.	NM_139207.1	-1.52	6.81	-1.45	6.53	-1.87	22.64	-1.78	21.14	0.09	0.02	0.06	0.01
ILMN_1751444	NCAPG	non-SMC condensin I complex, subunit G (NCAPG), mRNA.	NM_022346.3	-1.12	4.74	-1.48	7.37	-1.22	7.92	-1.44	10.64	-0.22	0.09	-0.35	0.2
ILMN_1743208	NEDD1	neural precursor cell expressed, developmentally down-regulated 1 (NEDD1), mRNA.	NM_152905.2	-1.25	2.53	-1.4	3.24	-1.49	8.01	-1.38	7.01	0.11	0.02	-0.16	0.02
ILMN_2261076	NEDD9	neural precursor cell expressed, developmentally down-regulated 9 (NEDD9), transcript variant 1, mRNA.	NM_006403.2	0.14	0.09	-2	8.31	0.76	4.08	-0.53	1.96	-1.29	8.49	-2.13	7.36
ILMN_1707312	NFIL3	nuclear factor, interleukin 3 regulated (NFIL3), mRNA.	NM_005384.2	-0.73	1.94	-1.49	6.7	-0.39	0.92	-1.08	7.15	-0.69	1.92	-0.76	1.17
ILMN_1742089	NLN	neurolysin (metallopeptidase M3 family) (NLN), mRNA.	NM_020726.3	-1	2.77	-1.07	3.2	-1.24	8.98	-1.13	7.55	0.12	0.03	-0.06	0.01
ILMN_2414007	NME2	non-metastatic cells 2, protein (NM23B) expressed in (NME2), transcript variant 4, mRNA.	NM_001018139.1	-1.72	9.83	-1.8	10.49	-1.18	6.28	-1.1	5.57	0.07	0.01	-0.08	0.02
ILMN_1676844	NR1D2	PREDICTED: nuclear receptor subfamily 1, group D, member 2 (NR1D2), mRNA.	XM_940036.1	-1.22	6.63	-0.97	4.74	-0.97	7.13	-1.14	9.56	-0.17	0.08	0.25	0.13
ILMN_1782305	NR4A2	nuclear receptor subfamily 4, group A, member 2 (NR4A2), transcript variant 1, mRNA.	NM_006186.2	-1.33	6.84	-1.75	10.09	-0.47	1.75	-1.55	16.15	-1.08	6.84	-0.41	0.33
ILMN_1718629	NRIP1	nuclear receptor interacting protein 1 (NRIP1), mRNA.	NM_003489.2	-0.88	1.9	-1.52	5.1	-1.29	7.55	-1.3	7.62	-0.01	0	-0.64	0.43
ILMN_1699574	NRP1	neuropilin 1 (NRP1), transcript variant 1, mRNA.	NM_003873.4	-1.58	7.34	-1.45	6.59	-1.77	12.82	-1.71	12.09	0.06	0.01	0.13	0.03
ILMN_1697220	NT5E	5'-nucleotidase, ecto (CD73) (NT5E), mRNA.	NM_002526.1	-1.17	4.07	-1.43	5.77	-0.96	4.46	-1	4.84	-0.04	0.01	-0.26	0.08
ILMN_1798886	NUDT21	nudix (nucleoside diphosphate linked moiety X)-type motif 21 (NUDT21), mRNA.	NM_007006.2	-0.92	1.73	-1.06	2.35	-1.95	9	-1.63	6.52	0.32	0.09	-0.14	0.02
ILMN_1765829	NUFIP2	nuclear fragile X mental retardation protein interacting protein 2 (NUFIP2), mRNA.	NM_020772.1	-1.32	3.25	-1.27	3.16	-1.22	4.64	-0.95	2.91	0.26	0.07	0.05	0.01
ILMN_1785852	OBFC2A	oligonucleotide/oligosaccharide-binding fold containing 2A (OBFC2A), mRNA.	NM_001031716.1	-0.62	2.69	-1.7	12.52	-0.04	0.04	-1.83	23.25	-1.78	19.37	-1.08	5.3
ILMN_2336094	ODZ3	odz, odd Oz/ten-m homolog 3 (Drosophila) (ODZ3), mRNA.	NM_001080477.1	-1.28	4.67	-0.83	2.3	-1.04	6.55	-0.75	3.47	0.3	0.2	0.45	0.25
ILMN_1749846	OMD	osteomodulin (OMD), mRNA.	NM_005014.1	-1.4	9.89	-1.39	9.87	-0.3	0.47	-1.07	6.04	-0.78	2.05	0.01	0
ILMN_2405078	OSBPL8	oxysterol binding protein-like 8 (OSBPL8), transcript variant 1, mRNA.	NM_020841.4	-1.92	4.58	-1.93	4.75	-1.23	4.44	-0.95	2.7	0.28	0.07	-0.01	0
ILMN_1757732	OSGIN2	oxidative stress induced growth inhibitor family member 2 (OSGIN2), mRNA.	NM_004337.1	-0.56	1.39	-1.08	4.64	-1.16	8.95	-1.28	10.68	-0.12	0.04	-0.52	0.52
ILMN_1723141	OTUD1	PREDICTED: OTU domain containing 1 (OTUD1), mRNA.	XM_001134465.1	0.2	0.29	-0.82	3.67	0.23	0.33	-1.17	7.97	-1.4	8.73	-1.03	3.84
ILMN_1676385	PAK2	PREDICTED: p21 (CDKN1A)-activated kinase 2 (PAK2), mRNA.	XM_001126110.1	-2.07	3.55	-1.6	2.35	-1.82	9.02	-1.65	7.63	0.16	0.03	0.47	0.07
ILMN_1709396	PDCD10	programmed cell death 10 (PDCD10), transcript variant 2, mRNA.	NM_145859.1	-1.24	2.3	-1.56	3.59	-1.73	9.17	-1.81	9.9	-0.08	0.01	-0.32	0.06
ILMN_2365196	PDCD10	programmed cell death 10 (PDCD10), transcript variant 3, mRNA.	NM_145860.1	-1.38	4.48	-1.71	6.45	-1.15	4.55	-1	3.48	0.15	0.03	-0.33	0.11
ILMN_1806328	PDIK1L	PDLIM1 interacting kinase 1 like (PDIK1L), mRNA.	NM_152835.2	-1.16	6.7	-0.38	0.99	-1.28	8.43	-1.16	7.16	0.11	0.03	0.78	2.39
ILMN_1723436	PFKFB2	6-phosphofructo-2-kinase/fructose-2,6-biphosphatase 2 (PFKFB2), transcript variant 2, mRNA.	NM_001018053.1	-0.8	4.35	-1.16	7.89	-1.05	10.55	-0.82	6.73	0.24	0.21	-0.36	0.42
ILMN_2102515	PGAM4	phosphoglycerate mutase family member 4 (PGAM4), mRNA.	NM_001029891.2	-1.81	10.16	-1.84	10.41	-1.37	9.15	-1.02	5.37	0.35	0.23	-0.02	0
ILMN_1693620	PGM3	phosphoglucomutase 3 (PGM3), mRNA.	NM_015599.1	-0.97	1.33	-1.22	2.16	-1.29	3.46	-1.13	2.67	0.16	0.02	-0.25	0.04
ILMN_2168314	PGM3	phosphoglucomutase 3 (PGM3), mRNA.	NM_015599.1	-0.98	2.02	-1.08	2.51	-1.21	5.19	-1.24	5.44	-0.03	0	-0.1	0.01
ILMN_1687978	PHLDA1	pleckstrin homology-like domain, family A, member 1 (PHLDA1), mRNA.	NM_007350.3	0.32	0.17	-2.72	6.96	0.43	0.7	-1.5	8.24	-1.93	10.42	-3.04	6.53
ILMN_1705985	PIGA	phosphatidylinositol glycan anchor biosynthesis, class A (paroxysmal nocturnal hemoglobinuria) (PIGA), transcript variant 3, mRNA.	NM_020473.2	-1.11	7.42	-1.53	11.52	-1.32	15.12	-1.69	22.18	-0.37	0.66	-0.42	0.65
ILMN_1815023	PIM1	pim-1 oncogene (PIM1), mRNA.	NM_002648.2	1.47	4	-0.61	0.86	0.03	0.03	-1.35	14.97	-1.38	13.04	-2.08	5.51
ILMN_1701195	PLA2G7	phospholipase A2, group VII (platelet-activating factor acetylhydrolase, plasma) (PLA2G7), mRNA.	NM_005084.2	-1.02	6.56	-0.88	5.31	-1.29	12.47	-1.09	9.41	0.2	0.11	0.14	0.06
ILMN_1789123	PLK4	polo-like kinase 4 (Drosophila) (PLK4), mRNA.	NM_014264.3	-0.99	3.97	-1.38	6.89	-1.77	18.25	-1.81	19.08	-0.04	0.01	-0.39	0.26
ILMN_1771599	PLOD2	procollagen-lysine, 2-oxoglutarate 5-dioxygenase 2 (PLOD2), transcript variant 2, mRNA.	NM_000935.2	-0.27	0.67	-1.02	7.08	-0.99	9.22	-1.08	10.68	-0.09	0.03	-0.75	3.03
ILMN_2041788	PLS3	plastin 3 (T isoform) (PLS3), mRNA.	NM_005032.3	-1.09	9.03	-1.1	9.2	-1.01	11.65	-0.91	9.67	0.11	0.05	-0.01	0
ILMN_2309156	PMEPA1	prostate transmembrane protein, androgen induced 1 (PMEPA1), transcript variant 2, mRNA.	NM_199169.1	1.01	3.33	-0.22	0.24	-0.95	5.95	-1.03	7	-0.09	0.02	-1.23	3.39
ILMN_1716862	PPM1B	protein phosphatase 1B (formerly 2C), magnesium-dependent, beta isoform (PPM1B), transcript variant 2, mRNA.	NM_177968.2	-1.3	13.22	-1.93	19.41	-1.55	23.32	-2.45	42.03	-0.91	7.89	-0.63	3.55
ILMN_1659058	PPP1R10	protein phosphatase 1, regulatory (inhibitor) subunit 10 (PPP1R10), mRNA.	NM_002714.2	0.26	0.37	-1.3	6.55	-0.69	3.22	-1.41	12.11	-0.72	2.33	-1.56	6.86
ILMN_1736670	PPP1R3C	protein phosphatase 1, regulatory (inhibitor) subunit 3C (PPP1R3C), mRNA.	NM_005398.4	-1.02	4.86	-1.04	5.12	-1.06	10.68	-0.94	8.71	0.12	0.05	-0.02	0
ILMN_2321485	PPP1R8	protein phosphatase 1, regulatory (inhibitor) subunit 8 (PPP1R8), transcript variant 1, mRNA.	NM_014110.3	-1.02	1.46	-1.17	2	-2.05	10.01	-2.02	9.67	0.04	0	-0.15	0.02
ILMN_1796210	PPRC1	peroxisome proliferator-activated receptor gamma, coactivator-related 1 (PPRC1), mRNA.	NM_015062.3	-0.08	0.1	-1.15	8.73	-0.28	0.62	-1.14	9.64	-0.85	4.14	-1.07	6.26
ILMN_1655622	PRKRIR	protein-kinase, interferon-inducible double stranded RNA dependent inhibitor, repressor of (P58 repressor) (PRKRIR), mRNA.	NM_004705.2	-0.83	4.69	-1.02	6.68	-1.33	13.44	-1.19	11.22	0.14	0.06	-0.2	0.11
ILMN_1737124	PRPF4B	PRP4 pre-mRNA processing factor 4 homolog B (yeast) (PRPF4B), transcript variant 2, mRNA.	NM_176800.1	-2.1	12.77	-1.94	11.62	-1.47	9.64	-1.45	9.5	0.01	0	0.16	0.05
ILMN_1703926	PTGER2	prostaglandin E receptor 2 (subtype EP2), 53kDa (PTGER2), mRNA.	NM_000956.2	-0.95	6.36	-1.29	9.93	-1.18	9.25	-1.11	8.24	0.08	0.02	-0.34	0.42
ILMN_2054297	PTGS2	prostaglandin-endoperoxide synthase 2 (prostaglandin G/H synthase and cyclooxygenase) (PTGS2), mRNA.	NM_000963.1	-0.7	1.17	-2.53	10.19	-1.08	7.25	-2	20.17	-0.92	3.78	-1.83	4.99
ILMN_1677511	PTGS2	prostaglandin-endoperoxide synthase 2 (prostaglandin G/H synthase and cyclooxygenase) (PTGS2), mRNA.	NM_000963.1	-0.79	2.75	-1.39	7.15	-0.96	7.89	-1.08	9.76	-0.12	0.05	-0.6	0.84
ILMN_1760575	PTP4A1	protein tyrosine phosphatase type IVA, member 1 (PTP4A1), mRNA.	NM_003463.3	-0.77	1.16	-1.25	2.94	-1.16	4.35	-1.51	7.12	-0.35	0.13	-0.47	0.15
ILMN_1695509	PTPN12	protein tyrosine phosphatase, non-receptor type 12 (PTPN12), mRNA.	NM_002835.2	-0.71	1.79	-1.12	4.17	-1.26	8.29	-1.45	10.59	-0.19	0.06	-0.41	0.22
ILMN_1747184	PUS7L	pseudouridylate synthase 7 homolog (S. cerevisiae)-like (PUS7L), transcript variant 1, mRNA.	NM_001098615.1	-1.19	5.19	-1.27	5.89	-1.61	16.45	-1.47	14.28	0.14	0.05	-0.08	0.02
ILMN_1667417	RAB23	RAB23, member RAS oncogene family (RAB23), transcript variant 1, mRNA.	NM_016277.3	-1.06	3.38	-1.02	3.28	-1.39	10.95	-1.22	8.8	0.17	0.06	0.04	0.01
ILMN_2346997	RAB23	RAB23, member RAS oncogene family (RAB23), transcript variant 1, mRNA.	NM_016277.3	-1.16	8.84	-1.15	8.8	-1.2	15.16	-1.2	15.19	0	0	0.01	0
ILMN_1790354	RABGGTB	Rab geranylgeranyltransferase, beta subunit (RABGGTB), mRNA.	NM_004582.2	-0.83	1.46	-1.17	2.88	-1.07	3.52	-1.22	4.62	-0.16	0.03	-0.34	0.09
ILMN_1722127	RAD54B	RAD54 homolog B (S. cerevisiae) (RAD54B), mRNA.	NM_012415.2	-1.16	4.9	-0.82	2.78	-1.77	15.7	-1.67	14.33	0.1	0.02	0.35	0.18
ILMN_1783846	RAPH1	Ras association (RalGDS/AF-6) and pleckstrin homology domains 1 (RAPH1), transcript variant 1, mRNA.	NM_213589.1	-0.74	2.27	-1.07	4.46	-0.93	8.69	-1.08	11.34	-0.15	0.08	-0.33	0.16
ILMN_1751378	RARS	arginyl-tRNA synthetase (RARS), mRNA.	NM_002887.3	-0.92	4.38	-1.01	5.25	-1.06	12.17	-0.91	9.28	0.16	0.1	-0.09	0.03
ILMN_1696591	RB1	retinoblastoma 1 (including osteosarcoma) (RB1), mRNA.	NM_000321.2	-1.22	3.43	-1.07	2.83	-1.87	14.04	-1.87	13.97	0.01	0	0.15	0.03
ILMN_1708611	RDX	radixin (RDX), mRNA.	NM_002906.3	-0.8	2.01	-1.18	4.18	-1.76	12.54	-1.86	13.73	-0.1	0.02	-0.39	0.17
ILMN_2380999	RECQL	RecQ protein-like (DNA helicase Q1-like) (RECQL), transcript variant 2, mRNA.	NM_032941.1	-1.78	4.63	-1.92	5.36	-1.49	8.64	-1.41	7.9	0.07	0.01	-0.14	0.02
ILMN_1794068	RFX4	regulatory factor X, 4 (influences HLA class II expression) (RFX4), transcript variant 2, mRNA.	NM_002920.3	-1.31	6.45	-1.5	8.01	-1.05	7.36	-1.14	8.55	-0.09	0.02	-0.19	0.06
ILMN_2197365	RGS2	regulator of G-protein signalling 2, 24kDa (RGS2), mRNA.	NM_002923.1	-2.18	13.33	-2.75	16.99	0.24	0.31	-2.14	18.6	-2.38	18.82	-0.57	0.79
ILMN_1685496	RGS7	regulator of G-protein signalling 7 (RGS7), mRNA.	NM_002924.3	-1.04	2.94	-1.24	4.16	-1.89	17.21	-2.04	19.51	-0.15	0.05	-0.21	0.05
ILMN_1755758	RIF1	RAP1 interacting factor homolog (yeast) (RIF1), mRNA.	NM_018151.3	-1.19	3.86	-1.23	4.18	-1.35	9.19	-1.41	9.87	-0.06	0.01	-0.03	0
ILMN_1655329	RIOK2	RIO kinase 2 (yeast) (RIOK2), mRNA.	NM_018343.1	-0.89	2.31	-1.07	3.33	-1.16	7.14	-0.79	3.46	0.37	0.29	-0.18	0.04
ILMN_2070210	RNF219	ring finger protein 219 (RNF219), mRNA.	NM_024546.3	-1.32	5.61	-1.53	7.12	-1.44	10.5	-1.66	13.45	-0.23	0.1	-0.21	0.06
ILMN_1808768	ROCK1	Rho-associated, coiled-coil containing protein kinase 1 (ROCK1), mRNA.	NM_005406.2	-1.19	2.24	-1.68	4.23	-1.1	5.4	-1.08	5.26	0.02	0	-0.49	0.14
ILMN_1766916	RPAP3	RNA polymerase II associated protein 3 (RPAP3), mRNA.	NM_024604.1	-1.04	3.71	-1.25	5.17	-1.42	12.63	-1.46	13.27	-0.04	0.01	-0.21	0.06
ILMN_1698231	RRM2B	ribonucleotide reductase M2 B (TP53 inducible) (RRM2B), mRNA.	NM_015713.3	-1.29	6.72	-1.35	7.3	-1.38	11.99	-1.3	10.86	0.08	0.02	-0.06	0.01
ILMN_2089458	SASS6	spindle assembly 6 homolog (C. elegans) (SASS6), mRNA.	NM_194292.1	-1	4.82	-0.82	3.53	-1.18	9.84	-1.09	8.49	0.09	0.03	0.19	0.07
ILMN_1794598	SCHIP1	schwannomin interacting protein 1 (SCHIP1), mRNA.	NM_014575.2	-0.08	0.08	-1.33	7.6	-0.4	2.45	-1.15	17.09	-0.75	6.53	-1.25	5.37
ILMN_1768050	SCOC	short coiled-coil protein (SCOC), mRNA.	NM_032547.1	-0.82	3.59	-1.09	5.81	-1.13	8.68	-1.1	8.22	0.03	0.01	-0.26	0.15
ILMN_1743427	SCYL3	SCY1-like 3 (S. cerevisiae) (SCYL3), transcript variant 1, mRNA.	NM_020423.4	-0.52	1.07	-1.03	3.84	0.31	0.83	-0.9	6.78	-1.21	9.25	-0.51	0.41
ILMN_2054233	SENP6	SUMO1/sentrin specific peptidase 6 (SENP6), mRNA.	NM_015571.1	-1.01	2.46	-1.4	4.46	-2.08	16.15	-1.88	13.75	0.2	0.06	-0.38	0.13
ILMN_1655595	SERPINE2	serpin peptidase inhibitor, clade E (nexin, plasminogen activator inhibitor type 1), member 2 (SERPINE2), mRNA.	NM_006216.2	-0.99	7.62	-1.5	13.16	-1.49	10.38	-1.03	5.31	0.46	0.47	-0.51	1.55
ILMN_1730794	SERTAD4	SERTA domain containing 4 (SERTAD4), mRNA.	NM_019605.2	-0.14	0.11	-2.07	9.67	-0.68	3.33	-1.2	9.61	-0.52	1.03	-1.93	7.12
ILMN_1776077	SF1	splicing factor 1 (SF1), transcript variant 4, mRNA.	NM_201997.1	-1.62	5.05	-1.99	7.05	0.38	0.58	-0.75	2.38	-1.12	3.75	-0.37	0.11
ILMN_1702487	SGK	serum/glucocorticoid regulated kinase (SGK), mRNA.	NM_005627.2	-0.5	0.57	-2.54	9.7	-0.05	0.06	-1.35	16.2	-1.29	12.71	-2.05	5.61
ILMN_2158242	SHOC2	soc-2 suppressor of clear homolog (C. elegans) (SHOC2), mRNA.	NM_007373.2	-1.09	3.09	-1.29	4.24	-1.5	8.12	-1.26	5.87	0.24	0.07	-0.2	0.05
ILMN_1743402	SIX4	SIX homeobox 4 (SIX4), mRNA.	NM_017420.3	-0.33	1.04	-1.11	8.46	-0.36	1.27	-1.33	15.27	-0.97	7.04	-0.78	3.58
ILMN_1732410	SLC16A9	solute carrier family 16, member 9 (monocarboxylic acid transporter 9) (SLC16A9), mRNA.	NM_194298.1	-1.16	7.97	-0.98	6.3	-1.2	8.52	-1.21	8.7	-0.01	0	0.19	0.1
ILMN_1730639	SLC22A15	solute carrier family 22 (organic cation transporter), member 15 (SLC22A15), mRNA.	NM_018420.1	-0.24	0.31	-1.25	6.18	-0.86	6.7	-1.05	9.47	-0.18	0.11	-1.01	3.1
ILMN_1766528	SLC25A36	solute carrier family 25, member 36 (SLC25A36), mRNA.	NM_018155.1	-1.64	4.32	-1.51	3.9	-1.43	8.16	-1.35	7.36	0.08	0.01	0.13	0.02
ILMN_1745021	SLC30A1	solute carrier family 30 (zinc transporter), member 1 (SLC30A1), mRNA.	NM_021194.2	-0.86	4.44	-1.33	8.7	-1.43	14.66	-1.51	16.01	-0.08	0.02	-0.46	0.69
ILMN_2067852	SLC30A1	solute carrier family 30 (zinc transporter), member 1 (SLC30A1), mRNA.	NM_021194.2	-0.89	5.21	-1.28	9.01	-1.27	14.52	-1.34	15.73	-0.06	0.02	-0.39	0.49
ILMN_1651799	SLC38A2	solute carrier family 38, member 2 (SLC38A2), mRNA.	NM_018976.3	-0.83	3.22	-2.16	13.24	-0.12	0.17	-1.96	27.19	-1.84	21.68	-1.33	5.48
ILMN_1676449	SLIT2	slit homolog 2 (Drosophila) (SLIT2), mRNA.	NM_004787.1	-1.71	7.89	-1.84	8.82	-1.19	9.56	-0.77	4.34	0.42	0.57	-0.12	0.03
ILMN_1767068	SMAD6	SMAD family member 6 (SMAD6), mRNA.	NM_005585.3	0.08	0.06	-1.29	5.24	-0.44	2.3	-1.12	13.17	-0.68	3.9	-1.37	4.27
ILMN_1713163	SMARCA5	SWI/SNF related, matrix associated, actin dependent regulator of chromatin, subfamily a, member 5 (SMARCA5), mRNA.	NM_003601.2	-1.29	2.74	-1.35	3.08	-1.48	9	-1.65	10.91	-0.17	0.05	-0.06	0.01
ILMN_1748923	SMC2	structural maintenance of chromosomes 2 (SMC2), transcript variant 1, mRNA.	NM_001042550.1	-1.13	2.95	-1.49	4.87	-2.13	16.19	-2.16	16.58	-0.03	0	-0.36	0.11
ILMN_2330861	SMC4	structural maintenance of chromosomes 4 (SMC4), transcript variant 2, mRNA.	NM_001002800.1	-0.84	3.34	-1.23	6.32	-1.3	11.1	-1.32	11.43	-0.02	0	-0.38	0.29
ILMN_1799381	SNORD14A	small nucleolar RNA, C/D box 14A (SNORD14A) on chromosome 11.	NR_000022.1	-0.79	2.04	-1.18	4.28	-1.03	9.24	-0.99	8.49	0.05	0.01	-0.39	0.18
ILMN_1666599	SNORD30	small nucleolar RNA, C/D box 30 (SNORD30) on chromosome 11.	NR_002561.1	-1	3.08	-1.48	6.07	-1.46	9.62	-1.69	12.39	-0.23	0.09	-0.48	0.31
ILMN_2072391	SNORD31	small nucleolar RNA, C/D box 31 (SNORD31) on chromosome 11.	NR_002560.1	-1.66	2.53	-1.85	3.18	-1.75	5.54	-1.82	5.94	-0.07	0.01	-0.19	0.02
ILMN_1797082	SNX13	sorting nexin 13 (SNX13), mRNA.	NM_015132.3	-0.91	2.44	-1.19	4.07	-1.34	10.88	-1.17	8.6	0.17	0.06	-0.28	0.09
ILMN_1753795	SOCS4	suppressor of cytokine signaling 4 (SOCS4), transcript variant 1, mRNA.	NM_199421.1	-1.17	4.29	-1.09	3.98	-1.06	8.98	-0.98	7.81	0.08	0.02	0.07	0.01
ILMN_1756942	SP3	Sp3 transcription factor (SP3), transcript variant 2, mRNA.	NM_001017371.3	-1.24	3.59	-1.47	4.89	-1.73	13.58	-1.76	14.09	-0.04	0.01	-0.23	0.05
ILMN_2145997	SP4	Sp4 transcription factor (SP4), mRNA.	NM_003112.3	-1.64	7.84	-1.53	7.23	-0.6	1.67	-1.3	7.55	-0.7	1.3	0.11	0.02
ILMN_1804277	SPRED1	sprouty-related, EVH1 domain containing 1 (SPRED1), mRNA.	NM_152594.1	-1.02	8.59	-1.76	16.52	-1.03	9.44	-1.8	23.11	-0.77	3.96	-0.74	4.02
ILMN_1804822	SRXN1	sulfiredoxin 1 homolog (S. cerevisiae) (SRXN1), mRNA.	NM_080725.1	-0.71	5.67	-1.01	9.52	-0.97	8.29	-1.04	9.48	-0.08	0.02	-0.3	0.52
ILMN_1809478	SSBP1	single-stranded DNA binding protein 1 (SSBP1), mRNA.	NM_003143.1	-0.88	3.33	-1.13	5.19	-0.96	7.52	-1.01	8.24	-0.05	0.01	-0.25	0.1
ILMN_1667315	STAG3L1	stromal antigen 3-like 1 (STAG3L1), transcript variant 1, mRNA.	NM_018991.2	-0.77	1.8	-1.16	3.85	-0.19	0.24	-1.47	11.68	-1.28	7.17	-0.39	0.16
ILMN_2391178	STAR	steroidogenic acute regulatory protein (STAR), nuclear gene encoding mitochondrial protein, transcript variant 2, mRNA.	NM_001007243.1	-1.06	5.48	-1.05	5.54	-1.02	8.12	-1.26	11.6	-0.23	0.15	0.01	0
ILMN_1691884	STC2	stanniocalcin 2 (STC2), mRNA.	NM_003714.2	-1.21	6.33	-0.69	2.54	-1.23	5.36	-0.9	2.94	0.33	0.13	0.52	0.7
ILMN_1653856	STS-1	Cbl-interacting protein Sts-1 (STS-1), mRNA.	NM_032873.3	-0.71	2.26	-1.16	5.47	-1.24	8.23	-1.28	8.73	-0.04	0.01	-0.46	0.4
ILMN_2194448	STT3B	STT3, subunit of the oligosaccharyltransferase complex, homolog B (S. cerevisiae) (STT3B), mRNA.	NM_178862.1	-0.89	1.61	-1.22	2.97	-1.55	8.85	-1.68	10.23	-0.13	0.03	-0.33	0.08
ILMN_1677532	TARDBP	TAR DNA binding protein (TARDBP), mRNA.	NM_007375.3	-1.14	4.61	-0.97	3.63	-1.51	14.37	-0.6	2.69	0.91	4.28	0.17	0.05
ILMN_1701058	TATDN1	TatD DNase domain containing 1 (TATDN1), mRNA.	NM_032026.2	-1.3	3.21	-1.17	2.8	-1.83	11.43	-1.6	9.06	0.23	0.07	0.13	0.02
ILMN_1688098	TBC1D4	TBC1 domain family, member 4 (TBC1D4), mRNA.	NM_014832.2	-1.23	6.75	-1.27	7.19	-1.28	12.63	-1.18	10.97	0.1	0.04	-0.04	0.01
ILMN_2314007	TCF12	transcription factor 12 (HTF4, helix-loop-helix transcription factors 4) (TCF12), transcript variant 2, mRNA.	NM_207037.1	-1.82	11.16	-1.73	10.44	-1.66	13.33	-1.16	7.19	0.5	0.64	0.1	0.03
ILMN_1669832	TCF12	transcription factor 12 (HTF4, helix-loop-helix transcription factors 4) (TCF12), transcript variant 4, mRNA.	NM_207038.1	-1.78	8.74	-1.86	9.4	-1.48	10.46	-0.98	4.95	0.5	0.6	-0.08	0.02
ILMN_1777096	TDG	thymine-DNA glycosylase (TDG), mRNA.	NM_003211.3	-0.77	3.87	-1.4	9.7	-1.1	14.56	-1.28	18.43	-0.17	0.15	-0.63	1.66
ILMN_2067709	TFB2M	transcription factor B2, mitochondrial (TFB2M), nuclear gene encoding mitochondrial protein, mRNA.	NM_022366.1	-0.66	2.9	-1.11	6.96	-0.47	2.81	-1.07	12.96	-0.6	3.21	-0.45	0.67
ILMN_2318643	TGIF1	TGFB-induced factor homeobox 1 (TGIF1), transcript variant 1, mRNA.	NM_170695.2	0.38	0.42	-0.87	2.11	0.96	8.68	-0.6	3.63	-1.56	16.55	-1.25	2.64
ILMN_2318638	TGIF1	TGFB-induced factor homeobox 1 (TGIF1), transcript variant 1, mRNA.	NM_170695.2	-0.14	0.11	-1.37	5.39	0.63	5.12	-0.61	4.77	-1.24	14.03	-1.23	3.18
ILMN_1690066	TIGD2	tigger transposable element derived 2 (TIGD2), mRNA.	NM_145715.2	-0.87	3.62	-1.22	6.41	-0.63	2.66	-1.13	7.99	-0.49	0.8	-0.35	0.24
ILMN_1761939	TIPIN	TIMELESS interacting protein (TIPIN), mRNA.	NM_017858.1	-1.25	5.19	-1.01	3.75	-1.28	7.61	-1.04	5.17	0.24	0.1	0.24	0.08
ILMN_2403006	TJP1	tight junction protein 1 (zona occludens 1) (TJP1), transcript variant 2, mRNA.	NM_175610.2	-1.02	4.58	-1.17	5.82	-1.22	8.99	-1.07	7.16	0.15	0.05	-0.15	0.05
ILMN_1725387	TMEM200A	transmembrane protein 200A (TMEM200A), mRNA.	NM_052913.2	-1.28	8.54	-1.03	6.35	-1.01	6.74	-0.96	6.04	0.06	0.01	0.25	0.16
ILMN_1770922	TMEM45A	transmembrane protein 45A (TMEM45A), mRNA.	NM_018004.1	-1.11	5.5	-1.02	4.93	-1.27	8.86	-1.18	7.75	0.09	0.02	0.09	0.02
ILMN_2150402	TMEM64	transmembrane protein 64 (TMEM64), mRNA.	NM_001008495.2	-0.84	3.75	-1.1	6	-1.08	9.54	-1.16	10.74	-0.08	0.02	-0.26	0.15
ILMN_2373010	TMEM70	transmembrane protein 70 (TMEM70), transcript variant 1, mRNA.	NM_017866.4	-1.57	9.25	-1.42	8.16	-1.11	7.29	-0.97	5.68	0.14	0.04	0.15	0.05
ILMN_2222688	TMSB4X	thymosin, beta 4, X-linked (TMSB4X), mRNA.	NM_021109.2	-1.49	8.61	-1.64	9.88	-1.7	28.53	-1.69	28.46	0.01	0	-0.15	0.05
ILMN_1732566	TMTC3	transmembrane and tetratricopeptide repeat containing 3 (TMTC3), mRNA.	NM_181783.2	-1.48	5.34	-1.52	5.7	-1.51	13.69	-1.53	13.97	-0.02	0	-0.04	0.01
ILMN_1837935	TNPO1	transportin 1 (TNPO1), transcript variant 2, mRNA.	NM_153188.2	-1.22	4.04	-1.05	3.26	-1.81	13.38	-1.62	11.11	0.19	0.06	0.17	0.04
ILMN_1786347	TNPO1	transportin 1 (TNPO1), transcript variant 2, mRNA.	NM_153188.2	-1.47	2.53	-1.16	1.72	-1.6	11.91	-0.83	3.61	0.77	1.94	0.31	0.05
ILMN_1686097	TOP2A	topoisomerase (DNA) II alpha 170kDa (TOP2A), mRNA.	NM_001067.2	-0.87	2.3	-1.05	3.29	-1.55	12.06	-1.6	12.74	-0.05	0.01	-0.17	0.04
ILMN_1783910	TRAF6	TNF receptor-associated factor 6 (TRAF6), transcript variant 1, mRNA.	NM_145803.1	-0.41	0.95	-1.06	5.28	-0.49	3.41	-1.1	14.73	-0.61	3.71	-0.64	1.22
ILMN_1788783	TRAM2	translocation associated membrane protein 2 (TRAM2), mRNA.	NM_012288.3	-1.5	14.33	-1.34	12.56	-1.48	15.87	-1.45	15.44	0.03	0.01	0.17	0.12
ILMN_1803811	TRIB1	tribbles homolog 1 (Drosophila) (TRIB1), mRNA.	NM_025195.2	-0.5	0.26	-2.58	5.16	-0.47	1.12	-2.01	17.32	-1.54	8.98	-2.09	2.38
ILMN_1700337	TROAP	trophinin associated protein (tastin) (TROAP), mRNA.	NM_005480.2	-0.97	5.6	-1.01	6.09	-1.05	10.37	-1.69	22.13	-0.64	2.78	-0.04	0.01
ILMN_1738909	TROVE2	TROVE domain family, member 2 (TROVE2), transcript variant 2, mRNA.	NM_004600.4	-0.66	2.99	-1.09	6.92	-0.74	4.65	-1.05	8.81	-0.31	0.32	-0.43	0.61
ILMN_1788166	TTK	TTK protein kinase (TTK), mRNA.	NM_003318.3	-1.21	4.6	-1.33	5.5	-1.51	13.43	-1.84	18.42	-0.33	0.28	-0.12	0.03
ILMN_1717056	TXNRD1	thioredoxin reductase 1 (TXNRD1), transcript variant 5, mRNA.	NM_001093771.1	-0.54	1.63	-1.4	8.27	-0.42	1.38	-1.75	19.63	-1.33	10.41	-0.86	2.63
ILMN_2324421	TXNRD1	thioredoxin reductase 1 (TXNRD1), transcript variant 4, mRNA.	NM_182743.1	-0.79	1.4	-1.53	4.7	-0.07	0.05	-1.45	10.89	-1.38	7.93	-0.73	0.53
ILMN_1770515	UBE2V2	ubiquitin-conjugating enzyme E2 variant 2 (UBE2V2), mRNA.	NM_003350.2	-1.12	3.7	-1.45	5.81	-1.44	8.94	-1.32	7.64	0.12	0.03	-0.33	0.13
ILMN_1696975	USP1	ubiquitin specific peptidase 1 (USP1), transcript variant 3, mRNA.	NM_001017416.1	-1.11	4.28	-1.4	6.36	-1.21	7.33	-1.19	7.04	0.03	0	-0.29	0.12
ILMN_1687284	USP12	ubiquitin specific peptidase 12 (USP12), mRNA.	NM_182488.1	-1.01	3.96	-1	4.03	-0.71	2.49	-1.04	5.29	-0.33	0.19	0.01	0
ILMN_2306077	USP33	ubiquitin specific peptidase 33 (USP33), transcript variant 2, mRNA.	NM_201624.1	-0.95	2.41	-1.13	3.4	-1	6.44	-0.77	3.96	0.23	0.11	-0.18	0.04
ILMN_1795275	USP53	ubiquitin specific peptidase 53 (USP53), mRNA.	NM_019050.2	-0.97	3.37	-1.39	6.24	-1.28	13.49	-1.19	12.03	0.09	0.03	-0.42	0.26
ILMN_1735908	UTP15	UTP15, U3 small nucleolar ribonucleoprotein, homolog (S. cerevisiae) (UTP15), mRNA.	NM_032175.2	-1.01	5.8	-1.78	12.8	-0.67	3.32	-1.32	11.61	-0.65	1.99	-0.78	2.62
ILMN_1697906	WBP4	WW domain binding protein 4 (formin binding protein 21) (WBP4), mRNA.	NM_007187.3	-0.61	1.91	-1.26	6.69	-0.98	6.9	-1.31	11.52	-0.33	0.33	-0.65	1.18
ILMN_1704621	WDR44	WD repeat domain 44 (WDR44), mRNA.	NM_019045.3	-0.77	3.04	-1.08	5.48	-0.98	6.62	-1.15	8.78	-0.17	0.06	-0.31	0.19
ILMN_1744240	WDR67	WD repeat domain 67 (WDR67), mRNA.	NM_145647.2	-1.17	5.34	-0.66	2.08	-1.07	8.37	-0.68	3.62	0.39	0.51	0.51	0.52
ILMN_1801869	WDR75	WD repeat domain 75 (WDR75), mRNA.	NM_032168.1	-1.09	5.32	-0.96	4.48	-1.11	13.23	-0.83	8.02	0.28	0.4	0.13	0.04
ILMN_1778561	WEE1	WEE1 homolog (S. pombe) (WEE1), mRNA.	NM_003390.2	-0.61	3.08	-1.38	10.79	-1.11	13.62	-2.06	33.76	-0.96	8.49	-0.77	3.28
ILMN_1809433	XBP1	X-box binding protein 1 (XBP1), transcript variant 1, mRNA.	NM_005080.2	-0.74	2.71	-1.22	6.35	-1.04	10.41	-1	9.62	0.05	0.01	-0.48	0.51
ILMN_1725121	XPO1	exportin 1 (CRM1 homolog, yeast) (XPO1), mRNA.	NM_003400.3	-1.14	4.24	-1.09	4.06	-1.97	16.46	-1.89	15.51	0.08	0.01	0.05	0.01
ILMN_2188374	XPOT	exportin, tRNA (nuclear export receptor for tRNAs) (XPOT), mRNA.	NM_007235.3	-1.43	1.88	-1.53	2.22	-1.59	4.55	-1.72	5.24	-0.12	0.01	-0.09	0.01
ILMN_1750145	YWHAG	tyrosine 3-monooxygenase/tryptophan 5-monooxygenase activation protein, gamma polypeptide (YWHAG), mRNA.	NM_012479.2	-1.91	6.77	-1.78	6.22	-1.35	4.81	-1.03	2.83	0.32	0.09	0.13	0.02
ILMN_2093500	ZBED5	zinc finger, BED-type containing 5 (ZBED5), mRNA.	NM_021211.2	0.05	0.02	-1.54	4.07	-0.01	0	-1.32	7.75	-1.32	5.83	-1.59	2.95
ILMN_1664424	ZBED5	zinc finger, BED-type containing 5 (ZBED5), mRNA.	NM_021211.2	0.05	0.02	-1.65	3.57	-1	4.12	-2.2	16.5	-1.2	4.12	-1.69	2.46
ILMN_1686360	ZNF124	zinc finger protein 124 (ZNF124), mRNA.	NM_003431.2	-1.49	9.32	-1.6	10.29	-1.2	9.55	-0.86	5.23	0.34	0.33	-0.11	0.03
ILMN_1684964	ZNF212	zinc finger protein 212 (ZNF212), mRNA.	NM_012256.2	-0.91	6.48	-1.32	10.99	-0.98	12.14	-1.49	23.52	-0.51	2.45	-0.41	0.82
ILMN_1755303	ZNF217	zinc finger protein 217 (ZNF217), mRNA.	NM_006526.2	-0.73	0.89	-1.72	4.42	-0.25	0.17	-1.36	4.17	-1.11	1.69	-0.99	0.79
ILMN_2117904	ZNF22	zinc finger protein 22 (KOX 15) (ZNF22), mRNA.	NM_006963.3	-1.15	10.12	-1.04	8.93	-0.88	8.38	-1	10.47	-0.12	0.06	0.11	0.06
ILMN_2061310	ZNF280C	zinc finger protein 280C (ZNF280C), mRNA.	NM_017666.2	-1.39	9.92	-1.54	11.32	-1.09	14.31	-1.56	24.6	-0.46	1.87	-0.14	0.06
ILMN_1728230	ZNF30	zinc finger protein 30 (ZNF30), transcript variant 2, mRNA.	NM_001099437.1	-1.51	10.61	-1.1	6.89	-1.39	17.12	-1.59	21.07	-0.2	0.15	0.42	0.55
ILMN_1692100	ZNF35	zinc finger protein 35 (ZNF35), mRNA.	NM_003420.3	-0.49	1.19	-1.18	5.8	-0.85	7.46	-1.08	11.35	-0.23	0.2	-0.69	1.29
ILMN_1658094	ZNF365	zinc finger protein 365 (ZNF365), transcript variant A, mRNA.	NM_014951.2	0.52	1.09	-0.52	1.18	0.54	2.32	-0.6	2.91	-1.15	7.59	-1.04	2.73
ILMN_1742541	ZNF518A	zinc finger protein 518A (ZNF518A), mRNA.	NM_014803.3	-0.95	4.21	-1.13	5.72	-0.47	2.09	-1.28	13.72	-0.81	4.56	-0.18	0.06
ILMN_1677785	ZNF559	zinc finger protein 559 (ZNF559), mRNA.	NM_032497.1	-0.83	3.68	-1.06	5.68	-0.74	4.11	-1.27	10.96	-0.53	1.14	-0.23	0.11
ILMN_1721629	ZNF654	zinc finger protein 654 (ZNF654), mRNA.	NM_018293.2	-1.09	2.21	-1.13	2.47	-1.42	9.93	-1.43	9.98	0	0	-0.04	0
ILMN_2367233	ZNF654	zinc finger protein 654 (ZNF654), mRNA.	NM_018293.2	-0.53	1.15	-1	3.91	-1.18	8.32	-1.04	6.57	0.14	0.05	-0.48	0.39
ILMN_1741313	ZNF782	zinc finger protein 782 (ZNF782), mRNA.	NM_001001662.1	-0.93	4.46	-1.08	5.85	-0.95	6.97	-1.19	10.38	-0.24	0.16	-0.15	0.06
ILMN_1688346	ZNF800	zinc finger protein 800 (ZNF800), mRNA.	NM_176814.3	-0.31	0.46	-1.32	6.39	-0.51	2.36	-1.2	11.91	-0.69	3.03	-1.01	2.88
ILMN_2225348	ZNF805	zinc finger protein 805 (ZNF805), mRNA.	NM_001023563.1	-0.83	1.76	-1.03	2.69	-1.04	5.46	-1.04	5.46	0	0	-0.19	0.04
ILMN_1777061	ZSWIM6	PREDICTED: zinc finger, SWIM-type containing 6 (ZSWIM6), mRNA.	XM_035299.8	-0.83	2.23	-1.44	5.78	-1.04	7.37	-1.1	8.1	-0.06	0.01	-0.6	0.52
ILMN_1806483	ZWILCH	Zwilch, kinetochore associated, homolog (Drosophila) (ZWILCH), transcript variant 1, mRNA.	NM_017975.3	-1.9	2.92	-1.6	2.25	-1.14	2.97	-1.32	4.03	-0.19	0.03	0.3	0.04
ILMN_2206746	BGN	biglycan (BGN), mRNA.	NM_001711.3	1.83	11.51	0.83	3.61	1.39	13.4	1.54	15.94	0.15	0.06	-1	3.54
ILMN_1767322	EDAR	ectodysplasin A receptor (EDAR), mRNA.	NM_022336.2	1.75	7.23	0.2	0.19	1.33	9.92	0.63	2.47	-0.7	1.83	-1.55	4.66
ILMN_2129572	F3	coagulation factor III (thromboplastin, tissue factor) (F3), mRNA.	NM_001993.2	-0.51	1.23	-1.7	9.37	1.15	5.67	0.37	0.59	-0.78	1.59	-1.18	4.11
ILMN_2115005	FGD2	FYVE, RhoGEF and PH domain containing 2 (FGD2), mRNA.	NM_173558.2	1.88	13.01	0.47	1.51	1.21	13.11	0.88	7.56	-0.33	0.49	-1.41	7.37
ILMN_1766650	FOXA1	forkhead box A1 (FOXA1), mRNA.	NM_004496.2	-0.49	1.37	-1.01	5.13	1.16	10.95	0.25	0.58	-0.91	5.34	-0.52	0.74
ILMN_1670926	GALNAC4S-6ST	B cell RAG associated protein (GALNAC4S-6ST), mRNA.	NM_015892.2	1.26	6.38	-0.29	0.51	1.09	14.62	0.33	1.54	-0.76	6.12	-1.55	7.06
ILMN_1796316	MMP9	matrix metallopeptidase 9 (gelatinase B, 92kDa gelatinase, 92kDa type IV collagenase) (MMP9), mRNA.	NM_004994.2	2.94	20.8	1.65	11.57	1.01	8.45	0.85	6.08	-0.17	0.08	-1.29	6.81
ILMN_1753439	RPTN	PREDICTED: repetin (RPTN), mRNA.	XM_937200.2	1.75	14.34	0.61	3.21	2.1	16.79	1.31	7.65	-0.78	1.73	-1.13	6.8
ILMN_1789627	2005-09-01	septin 5 (SEPT5), mRNA.	NM_002688.4	2.39	17.21	1.34	8.75	1.28	12.64	1.14	10.45	-0.14	0.06	-1.05	4.61
ILMN_1714170	SPSB1	splA/ryanodine receptor domain and SOCS box containing 1 (SPSB1), mRNA.	NM_025106.2	1.93	9.04	0.89	2.71	1.02	8.87	1.05	9.42	0.03	0.01	-1.04	2.32
ILMN_2412380	TSC22D1	TSC22 domain family, member 1 (TSC22D1), transcript variant 1, mRNA.	NM_183422.1	-0.22	0.21	-1.09	3.79	1.33	6.17	0.64	1.47	-0.69	0.86	-0.87	1.46
ILMN_2072568	CLDN8	claudin 8 (CLDN8), mRNA.	NM_199328.1	1.49	8.03	1.55	8.56	2.49	30.37	1.41	13.02	-1.08	6.4	0.05	0.01
ILMN_1746676	CLDN8	claudin 8 (CLDN8), mRNA.	NM_199328.1	1.17	5.65	1.1	5.28	2.35	29.25	1.25	11.16	-1.1	7.05	-0.07	0.01
ILMN_1750497	GPR109A	G protein-coupled receptor 109A (GPR109A), mRNA.	NM_177551.3	1.29	6.32	0.62	1.89	1.73	14.15	0.72	2.89	-1.01	3.91	-0.67	1.13
ILMN_2405254	GRB7	growth factor receptor-bound protein 7 (GRB7), transcript variant 2, mRNA.	NM_001030002.1	1.59	7.29	0.8	2.41	1.12	5.62	-0.05	0.03	-1.17	4.46	-0.79	1.32
ILMN_1662917	LMO1	LIM domain only 1 (rhombotin 1) (LMO1), mRNA.	NM_002315.1	1.51	6.7	0.8	2.41	1.4	7.24	0.37	0.54	-1.03	2.71	-0.71	0.96

## Sheet: BI1_4h
Illumina Identifier	HGNC gene symbol	Gene Description	Refseq ID	BI1 LR(0.08uM+TGFb/UT+DMSO+TGFb)	BI1 -log10(pVAL(0.08uM+TGFb/UT+DMSO+TGFb))	BI1 LR(2uM+TGFb/UT+DMSO+TGFb)	BI1 -log10(pVAL(2uM+TGFb/UT+DMSO+TGFb))	BI1 LR(0.08uM-TGFb/UT+DMSO)	BI1 -log10(pVAL(0.08uM-TGFb/UT+DMSO))	BI1 LR(2uM-TGFb/UT+DMSO)	BI1 -log10(pVAL(2uM-TGFb/UT+DMSO))	BI1 LR(2uM-TGFb/0.08uM-TGFb)	BI1 -log10(pVAL(2uM-TGFb/0.08uM-TGFb))	BI1 LR(2uM+TGFb/0.08uM+TGFb)	BI1 -log10(pVAL(2uM+TGFb/0.08uM+TGFb))
ILMN_1658176	ABCG1	ATP-binding cassette, sub-family G (WHITE), member 1 (ABCG1), transcript variant 7, mRNA.	NM_207629.1	-0.28	0.33	0.95	4.97	0.57	1.78	1.4	13.42	0.83	3.08	1.24	5.29
ILMN_1731433	ABP1	amiloride binding protein 1 (amine oxidase (copper-containing)) (ABP1), mRNA.	NM_001091.2	1.13	1.93	1.7	5.82	1.11	2.45	1.18	3.85	0.06	0.01	0.58	0.39
ILMN_1666690	ACRC	acidic repeat containing (ACRC), mRNA.	NM_052957.3	-0.55	1.81	1.02	7.44	-0.18	0.22	1.32	14.56	1.5	12.62	1.57	10.16
ILMN_2223359	ADH7	alcohol dehydrogenase 7 (class IV), mu or sigma polypeptide (ADH7), mRNA.	NM_000673.3	1.78	7.12	1.68	8.51	1.45	9.9	1.65	15.86	0.2	0.08	-0.1	0.02
ILMN_1714253	AGRP	agouti related protein homolog (mouse) (AGRP), transcript variant 2, mRNA.	NM_007316.1	0.22	0.35	2.25	21.14	0.29	1.03	2.02	40.23	1.73	25.54	2.03	15.59
ILMN_1672148	AKR1B10	aldo-keto reductase family 1, member B10 (aldose reductase) (AKR1B10), mRNA.	NM_020299.3	1.28	6.14	1.19	7.27	1.31	6.71	0.44	1.06	-0.87	2.33	-0.09	0.03
ILMN_2412336	AKR1C2	aldo-keto reductase family 1, member C2 (dihydrodiol dehydrogenase 2; bile acid binding protein; 3-alpha hydroxysteroid dehydrogenase, type III) (AKR1C2), transcript variant 1, mRNA. XM_943424 XM_943425 XM_943427	NM_001354.4	1.36	6.55	0.8	3.65	1.39	16.95	0.58	4.71	-0.81	5.65	-0.56	1.12
ILMN_2096372	ALDH1A1	aldehyde dehydrogenase 1 family, member A1 (ALDH1A1), mRNA.	NM_000689.3	1.28	3.15	1.47	5.58	2.16	11.26	1.72	9.91	-0.44	0.23	0.19	0.05
ILMN_1702503	ALDH3A1	aldehyde dehydrogenase 3 family, memberA1 (ALDH3A1), mRNA.	NM_000691.3	1	3.61	1.51	9.34	1.79	17.78	1.39	14.99	-0.4	0.61	0.51	0.82
ILMN_1763666	ALDH3B2	aldehyde dehydrogenase 3 family, member B2 (ALDH3B2), transcript variant 2, mRNA.	NM_001031615.1	1.2	2.61	2.16	9.39	1.5	9.02	1.47	11.49	-0.02	0	0.96	1.54
ILMN_1801851	ALPPL2	alkaline phosphatase, placental-like 2 (ALPPL2), mRNA.	NM_031313.1	0.82	1.72	1.58	7.69	1.5	11.43	1.29	11.51	-0.21	0.1	0.76	1.33
ILMN_1803779	AP2A2	adaptor-related protein complex 2, alpha 2 subunit (AP2A2), mRNA.	NM_012305.2	0.05	0.02	1.22	4.48	0.51	1.22	1.08	7.49	0.57	1.02	1.17	2.72
ILMN_2177460	AQR	aquarius homolog (mouse) (AQR), mRNA.	NM_014691.2	-0.09	0.04	0.95	2.66	0.31	0.36	1.18	7.25	0.87	2.25	1.04	2.01
ILMN_2408851	ARHGAP30	Rho GTPase activating protein 30 (ARHGAP30), transcript variant 2, mRNA.	NM_181720.2	0.55	0.96	2.98	18.98	0.61	1.75	1.75	17.13	1.14	5.32	2.43	12.17
ILMN_1666076	ARHGEF4	Rho guanine nucleotide exchange factor (GEF) 4 (ARHGEF4), transcript variant 1, mRNA.	NM_015320.2	0.59	0.51	1.33	3.81	1.17	5.02	1.01	5.17	-0.16	0.04	0.75	0.71
ILMN_1708778	ASS1	argininosuccinate synthetase 1 (ASS1), transcript variant 1, mRNA.	NM_000050.4	1.15	2.64	1.97	8.89	1.83	20.12	1.84	25.13	0.01	0	0.83	1.24
ILMN_2395451	ASS1	argininosuccinate synthetase 1 (ASS1), transcript variant 2, mRNA.	NM_054012.3	1.2	1.89	1.91	6.17	2.46	20.15	2.59	26.73	0.13	0.03	0.7	0.52
ILMN_1726025	ASXL1	additional sex combs like 1 (Drosophila) (ASXL1), mRNA.	NM_015338.4	0.97	3.29	1.42	8.34	1.3	12.41	1.38	17.45	0.08	0.03	0.45	0.59
ILMN_1812073	ATP6V1B1	ATPase, H+ transporting, lysosomal 56/58kDa, V1 subunit B1 (Renal tubular acidosis with deafness) (ATP6V1B1), mRNA.	NM_001692.3	1.66	4.96	2.37	10.98	2.49	20.19	2.05	18.72	-0.45	0.42	0.71	0.85
ILMN_1751465	BNC1	basonuclin 1 (BNC1), mRNA.	NM_001717.2	0.82	1.14	1	2.56	0.67	1.97	1.16	7.84	0.48	0.6	0.18	0.04
ILMN_2205963	C10orf54	chromosome 10 open reading frame 54 (C10orf54), mRNA.	NM_022153.1	-0.2	0.37	0.9	8.84	0.81	4.97	1.05	10.69	0.24	0.19	1.1	8.61
ILMN_1757847	C11orf68	chromosome 11 open reading frame 68 (C11orf68), mRNA.	NM_031450.2	0.2	0.14	1.15	4.76	0.7	2.58	1.13	8.99	0.44	0.59	0.95	2.18
ILMN_1775330	C15orf52	chromosome 15 open reading frame 52 (C15orf52), mRNA.	NM_207380.1	1.56	8.78	1.06	6.5	2.24	25.9	1.78	22.98	-0.46	0.96	-0.49	0.97
ILMN_1693630	C16orf7	chromosome 16 open reading frame 7 (C16orf7), mRNA.	NM_004913.2	0.77	2.02	1.26	6.76	0.99	7.11	1.02	9.95	0.03	0.01	0.49	0.67
ILMN_2073446	C1orf116	chromosome 1 open reading frame 116 (C1orf116), mRNA.	NM_023938.4	1.3	6.96	0.93	5.45	1.31	13.08	1.18	14.13	-0.13	0.06	-0.37	0.52
ILMN_1754894	C1orf162	chromosome 1 open reading frame 162 (C1orf162), mRNA.	NM_174896.2	-0.17	0.19	2.91	24.31	-0.19	0.29	2.1	31.6	2.29	27.45	3.08	21.56
ILMN_1789058	C1orf188	chromosome 1 open reading frame 188 (C1orf188), mRNA.	NM_173795.2	0.6	1.02	1.09	4.75	1.13	7.23	0.55	2.42	-0.59	1.38	0.49	0.57
ILMN_1786470	C1orf74	chromosome 1 open reading frame 74 (C1orf74), mRNA.	NM_152485.2	1.77	13.89	2.02	19.11	0.48	2.05	1.6	23.48	1.11	9.17	0.24	0.31
ILMN_1733288	C1RL	complement component 1, r subcomponent-like (C1RL), mRNA.	NM_016546.1	1.42	7.43	1.75	12.43	1.24	10.73	1.57	20.27	0.33	0.45	0.33	0.35
ILMN_2198270	C20orf106	chromosome 20 open reading frame 106 (C20orf106), mRNA.	NM_001012971.2	0.05	0.04	1.78	14.86	-0.22	0.37	0.99	9.97	1.21	9.66	1.73	11.3
ILMN_2174711	C21orf129	chromosome 21 open reading frame 129 (C21orf129), mRNA.	NM_152506.1	0.85	1.82	1.63	7.97	1.54	7.79	0.98	4.46	-0.57	0.63	0.78	1.4
ILMN_1759595	C22orf29	chromosome 22 open reading frame 29 (C22orf29), mRNA.	NM_024627.5	0.07	0.05	1.42	10.54	0.41	1.05	1.19	11.72	0.78	3.23	1.35	7.3
ILMN_1737255	C22orf36	chromosome 22 open reading frame 36 (C22orf36), mRNA.	NM_207644.2	1.18	4.94	0.52	1.56	1.21	8.16	0.41	1.37	-0.79	2.89	-0.66	1.49
ILMN_1741475	C7orf47	chromosome 7 open reading frame 47 (C7orf47), mRNA.	NM_145030.1	0.72	3.14	1.34	11.08	0.73	6.96	1.1	17.99	0.36	1.18	0.62	2.16
ILMN_1804895	C7orf53	chromosome 7 open reading frame 53 (C7orf53), mRNA.	NM_182597.1	-0.03	0.02	2.12	13.23	-0.81	2.9	1.19	8.3	2	14.14	2.16	10.45
ILMN_1777740	C8orf55	chromosome 8 open reading frame 55 (C8orf55), mRNA.	NM_016647.2	0.57	3	1.02	10.15	1.03	10.89	0.97	12.77	-0.06	0.02	0.44	1.67
ILMN_1683175	C9orf23	chromosome 9 open reading frame 23 (C9orf23), transcript variant 1, mRNA.	NM_148178.1	0.53	1.98	1.06	8.98	0.92	6.29	1.14	12.24	0.22	0.16	0.53	1.83
ILMN_1674629	C9orf3	chromosome 9 open reading frame 3 (C9orf3), mRNA.	NM_032823.3	1.37	11.53	1.12	11.14	1.28	12.42	0.96	9.76	-0.32	0.47	-0.25	0.4
ILMN_1674650	C9orf95	chromosome 9 open reading frame 95 (C9orf95), mRNA.	NM_017881.1	0.95	3.31	1.14	6.29	1.48	8.29	0.9	4.38	-0.58	0.83	0.2	0.09
ILMN_1749118	CALML5	calmodulin-like 5 (CALML5), mRNA.	NM_017422.3	1.22	2.76	1.69	6.73	0.65	2.09	1	6.78	0.35	0.3	0.47	0.3
ILMN_1787441	CCDC17	coiled-coil domain containing 17 (CCDC17), mRNA.	NM_152500.1	-0.23	0.24	1.55	10.25	-0.52	2.96	0.98	12.66	1.5	18.28	1.78	9.3
ILMN_1663370	CCDC62	coiled-coil domain containing 62 (CCDC62), transcript variant 2, mRNA.	NM_201435.2	-0.16	0.14	2.2	15.73	-0.21	0.27	1.96	24.84	2.16	21.49	2.36	13.69
ILMN_2377669	CD247	CD247 molecule (CD247), transcript variant 1, mRNA.	NM_198053.1	-0.21	0.27	3.24	26.3	-0.07	0.07	3.35	62.15	3.42	53.12	3.45	23.58
ILMN_1676924	CD247	CD247 molecule (CD247), transcript variant 2, mRNA.	NM_000734.2	0.02	0.01	3.27	28.43	-0.06	0.06	3.31	60.53	3.36	51.48	3.25	24.27
ILMN_1760247	CD70	CD70 molecule (CD70), mRNA.	NM_001252.3	-0.25	0.24	1.25	6.86	1.05	5.52	1.17	9.16	0.13	0.04	1.49	6.47
ILMN_1714592	CDA	cytidine deaminase (CDA), mRNA.	NM_001785.2	0.51	1.36	1.12	7.83	1.06	6.21	1.25	11.08	0.19	0.08	0.61	1.77
ILMN_2062271	CDK5R1	cyclin-dependent kinase 5, regulatory subunit 1 (p35) (CDK5R1), mRNA.	NM_003885.2	-0.06	0.05	1.01	7.96	0.15	0.21	1.03	12.8	0.88	6.42	1.07	6.23
ILMN_1747556	CDK9	cyclin-dependent kinase 9 (CDC2-related kinase) (CDK9), mRNA.	NM_001261.2	1.06	4.96	1.55	11.26	0.93	6.44	1.23	14.08	0.31	0.37	0.48	0.97
ILMN_2297315	CDRT1	CMT1A duplicated region transcript 1 (CDRT1), mRNA.	NM_006382.1	0.53	1.19	1.76	12.49	0.42	1.43	1.59	22.34	1.17	9.48	1.23	5.57
ILMN_1731609	CHMP6	PREDICTED: chromatin modifying protein 6 (CHMP6), mRNA.	XM_001132548.1	1.46	9.49	1.14	8.6	1.4	12.73	1.51	18.28	0.11	0.04	-0.32	0.47
ILMN_1784608	CLEC2B	C-type lectin domain family 2, member B (CLEC2B), mRNA.	NM_005127.2	1.08	2.75	1.11	4.1	1.01	4.9	0.63	2.68	-0.38	0.35	0.03	0
ILMN_1709204	CLEC4A	C-type lectin domain family 4, member A (CLEC4A), transcript variant 3, mRNA.	NM_194447.2	-0.18	0.19	1.65	12.23	-0.13	0.16	0.9	8.85	1.03	7.47	1.84	10.8
ILMN_2399363	CLEC4A	C-type lectin domain family 4, member A (CLEC4A), transcript variant 4, mRNA.	NM_194448.1	-0.03	0.01	1.94	13.75	0.26	0.55	1.63	24.41	1.37	13.57	1.97	10.93
ILMN_1796423	CLIC3	chloride intracellular channel 3 (CLIC3), mRNA.	NM_004669.2	1.45	4.59	1.91	9.32	2.33	15.8	2.36	20.25	0.03	0.01	0.46	0.36
ILMN_1695961	CLK3	CDC-like kinase 3 (CLK3), transcript variant phclk3, mRNA.	NM_003992.2	0.43	1.23	1.12	9.42	0.7	3.09	1.33	13.66	0.63	1.89	0.69	2.99
ILMN_2394027	CLK3	CDC-like kinase 3 (CLK3), transcript variant phclk3/152, mRNA.	NM_001292.1	0.11	0.06	1	3.39	0.83	3.4	1.11	8.07	0.28	0.17	0.89	1.71
ILMN_1695853	CLK4	CDC-like kinase 4 (CLK4), mRNA.	NM_020666.2	1.59	8.54	1.45	9.54	1.08	5.59	1.47	12.84	0.39	0.37	-0.15	0.06
ILMN_1805765	CMYA5	cardiomyopathy associated 5 (CMYA5), mRNA.	NM_153610.3	-0.04	0.02	2.13	13.8	-0.06	0.05	1.57	20.06	1.63	15.36	2.16	11.04
ILMN_1690170	CRABP2	cellular retinoic acid binding protein 2 (CRABP2), mRNA.	NM_001878.2	1.49	6.69	2.33	15.04	1.53	15.77	1.8	25.04	0.27	0.26	0.84	2.22
ILMN_1807719	CTNS	cystinosis, nephropathic (CTNS), transcript variant 2, mRNA.	NM_004937.2	0.2	0.28	1.1	9.14	0.52	1.91	1.25	13.64	0.73	3.06	0.9	4.79
ILMN_1745256	CXXC5	CXXC finger 5 (CXXC5), mRNA.	NM_016463.5	0.25	0.23	1.03	4.67	1.07	8.74	0.73	5.75	-0.34	0.52	0.78	1.77
ILMN_1807291	CYP1A1	cytochrome P450, family 1, subfamily A, polypeptide 1 (CYP1A1), mRNA.	NM_000499.2	0.44	0.68	1.6	10.05	1.41	5.54	1.88	12.37	0.47	0.3	1.16	4.41
ILMN_1693338	CYP1B1	cytochrome P450, family 1, subfamily B, polypeptide 1 (CYP1B1), mRNA.	NM_000104.2	1.39	4.83	2.03	11.03	1.09	3.83	1.44	8.77	0.35	0.18	0.64	0.94
ILMN_1665437	CYP2E1	cytochrome P450, family 2, subfamily E, polypeptide 1 (CYP2E1), mRNA.	NM_000773.3	0.44	1.46	1.09	9.76	0.59	4.81	1.25	23.04	0.67	5.22	0.65	2.93
ILMN_1810942	CYP3A5	cytochrome P450, family 3, subfamily A, polypeptide 5 (CYP3A5), mRNA.	NM_000777.2	1.86	3.1	2.37	6.51	3.7	14.9	2.33	8.7	-1.37	1.68	0.51	0.16
ILMN_1809384	CYP4F12	cytochrome P450, family 4, subfamily F, polypeptide 12 (CYP4F12), mRNA.	NM_023944.2	1.18	4.02	1.95	11.42	1.51	8.55	1.21	7.58	-0.3	0.15	0.78	1.66
ILMN_1736190	CYP4F3	cytochrome P450, family 4, subfamily F, polypeptide 3 (CYP4F3), mRNA.	NM_000896.1	1.6	7.98	1.89	12.47	1.23	5.09	0.4	0.75	-0.83	1.71	0.29	0.22
ILMN_1708340	DAPK1	death-associated protein kinase 1 (DAPK1), mRNA.	NM_004938.2	1.22	3.57	1.44	6.46	1.24	6.45	0.75	3.37	-0.49	0.59	0.21	0.07
ILMN_1687556	DAPL1	death associated protein-like 1 (DAPL1), mRNA.	NM_001017920.1	1.07	2.43	1.88	8.65	1.3	5.55	1.67	11.71	0.37	0.21	0.81	1.27
ILMN_1763605	DIDO1	death inducer-obliterator 1 (DIDO1), transcript variant 3, mRNA.	NM_080797.2	-0.32	0.46	1.1	7.03	-0.37	0.82	1.19	11.22	1.57	12.41	1.42	7.39
ILMN_2174189	DKK1	dickkopf homolog 1 (Xenopus laevis) (DKK1), mRNA.	NM_012242.2	1.05	2.46	0.81	2.22	2.08	9.99	2.45	16.99	0.37	0.15	-0.23	0.08
ILMN_2112915	DRD4	dopamine receptor D4 (DRD4), mRNA.	NM_000797.2	-0.37	0.51	1.34	7.91	-0.61	2.73	0.56	3.16	1.17	8.35	1.71	8.24
ILMN_2238302	DST	dystonin (DST), transcript variant 1e, mRNA.	NM_001723.3	1.36	4.65	0.55	1.19	1.88	10.67	1.32	7.43	-0.57	0.59	-0.82	1.62
ILMN_1710622	DUOXA1	dual oxidase maturation factor 1 (DUOXA1), mRNA.	NM_144565.2	1.29	7.49	0.88	5.44	1.5	15.39	1.08	11.34	-0.42	0.88	-0.41	0.77
ILMN_1767322	EDAR	ectodysplasin A receptor (EDAR), mRNA.	NM_022336.2	0.91	1.59	1.28	4.47	1.86	13.62	1.06	6.68	-0.8	2.1	0.38	0.19
ILMN_1764873	ELAVL1	ELAV (embryonic lethal, abnormal vision, Drosophila)-like 1 (Hu antigen R) (ELAVL1), mRNA.	NM_001419.2	0.02	0.01	1.2	10.49	-0.11	0.12	1.21	14.88	1.31	12.04	1.19	7.64
ILMN_1770245	EPB41L5	erythrocyte membrane protein band 4.1 like 5 (EPB41L5), mRNA.	NM_020909.2	-0.38	0.89	0.63	3.61	-0.45	1.36	0.62	3.63	1.07	6.6	1.01	5.53
ILMN_1699354	EPHA2	EPH receptor A2 (EPHA2), mRNA.	NM_004431.2	0.33	0.2	1.67	5.83	0.53	1.54	1.37	13.02	0.84	3.19	1.34	2.64
ILMN_1726893	EPN3	epsin 3 (EPN3), mRNA.	NM_017957.1	0.75	1.77	1.21	6.11	1.38	10.63	1.34	13.07	-0.04	0.01	0.47	0.57
ILMN_1652749	ERF	Ets2 repressor factor (ERF), mRNA.	NM_006494.1	-0.2	0.09	1.08	2.48	0.98	5.28	1.63	16.89	0.64	1.67	1.28	2.19
ILMN_1774272	ESRRA	estrogen-related receptor alpha (ESRRA), mRNA.	NM_004451.3	0.17	0.11	1.09	4.46	1.18	12.05	1.15	14.87	-0.03	0.01	0.91	2.1
ILMN_1745583	EXOC1	exocyst complex component 1 (EXOC1), transcript variant 3, mRNA.	NM_001024924.1	-0.57	0.64	0.57	0.97	0.28	0.36	1.15	8.64	0.87	3.02	1.14	2.38
ILMN_1723268	FAIM	Fas apoptotic inhibitory molecule (FAIM), transcript variant 1, mRNA.	NM_001033030.1	0.05	0.03	1.1	6.48	0.2	0.27	1.09	10.69	0.89	4.67	1.05	4.17
ILMN_2408576	FAM129B	family with sequence similarity 129, member B (FAM129B), transcript variant 2, mRNA.	NM_001035534.1	0.22	0.14	1.05	3.4	0.78	4.22	1.04	9.72	0.26	0.21	0.83	1.32
ILMN_2184884	FAM154B	family with sequence similarity 154, member B (FAM154B), mRNA.	NM_001008226.1	0.61	1.34	1.23	6.86	0.78	2.94	1.49	13.02	0.7	1.73	0.62	1.24
ILMN_1704571	FAM53B	family with sequence similarity 53, member B (FAM53B), mRNA.	NM_014661.3	0	0	1.31	3.95	0.81	3.41	1.18	9.31	0.37	0.35	1.31	2.57
ILMN_1754279	FBXW7	F-box and WD repeat domain containing 7 (FBXW7), transcript variant 1, mRNA.	NM_033632.2	1.46	8.28	0.9	5.16	0.56	1.76	1.02	7.93	0.46	0.74	-0.56	1.36
ILMN_1746465	FJX1	four jointed box 1 (Drosophila) (FJX1), mRNA.	NM_014344.2	1.16	8.14	1.17	10.48	1.65	13.28	1.92	21.51	0.27	0.18	0.01	0
ILMN_1700098	FLJ22531	PREDICTED: hypothetical protein FLJ22531, transcript variant 5 (FLJ22531), mRNA.	XM_945497.1	0.34	0.55	1.02	6.41	0.85	4.19	1.55	16.27	0.7	2.15	0.68	2.05
ILMN_1691966	FLJ35934	FLJ35934 protein (FLJ35934), mRNA.	NM_207453.1	1.35	7.03	1.34	9.02	1.34	11.15	0.97	8.19	-0.38	0.52	-0.01	0
ILMN_2173524	FOXD4	forkhead box D4 (FOXD4), mRNA.	NM_207305.2	-0.08	0.05	1.66	10.33	0.17	0.25	1.66	24.41	1.49	15.05	1.75	8.23
ILMN_1781867	FOXD4L1	forkhead box D4-like 1 (FOXD4L1), mRNA.	NM_012184.4	-0.06	0.05	2.05	17.21	-0.27	0.77	1.5	25.82	1.77	24.64	2.11	14.34
ILMN_2085441	FOXD4L1	forkhead box D4-like 1 (FOXD4L1), mRNA.	NM_012184.3	-0.06	0.04	1.87	15.75	0.24	0.33	1.99	23.95	1.74	14.24	1.93	13.06
ILMN_1712896	FST	follistatin (FST), transcript variant FST317, mRNA.	NM_006350.2	2.3	6.89	2.45	9.7	1.9	6.81	2.32	12.72	0.42	0.14	0.15	0.03
ILMN_1791580	FXYD3	FXYD domain containing ion transport regulator 3 (FXYD3), transcript variant 1, mRNA.	NM_005971.2	0.71	2.3	1.17	7.46	1.34	9.91	1.28	11.97	-0.06	0.01	0.45	0.78
ILMN_1665372	FXYD3	FXYD domain containing ion transport regulator 3 (FXYD3), transcript variant 2, mRNA.	NM_021910.1	0.88	1.44	1.27	4.27	1.36	7.67	1.5	11.92	0.14	0.04	0.39	0.2
ILMN_1665964	GAB2	GRB2-associated binding protein 2 (GAB2), transcript variant 1, mRNA.	NM_080491.1	0.06	0.05	1.25	9.42	0.93	6.16	1.37	16.05	0.45	0.92	1.19	6.36
ILMN_1784706	GABRE	gamma-aminobutyric acid (GABA) A receptor, epsilon (GABRE), transcript variant 1, mRNA.	NM_004961.3	1.43	5.15	0.98	3.71	1.19	3.05	0.87	2.28	-0.32	0.09	-0.45	0.43
ILMN_2406656	GATA3	GATA binding protein 3 (GATA3), transcript variant 2, mRNA.	NM_002051.2	1.21	7.45	1.29	10.36	1.07	5.51	0.96	6.07	-0.11	0.03	0.08	0.03
ILMN_1727087	GJA1	gap junction protein, alpha 1, 43kDa (GJA1), mRNA.	NM_000165.3	1.41	4.96	0.53	1.12	1.11	3.39	1	3.85	-0.11	0.02	-0.88	1.91
ILMN_1718268	GJB4	gap junction protein, beta 4, 30.3kDa (GJB4), mRNA.	NM_153212.1	1.01	4.07	0.54	1.8	1.04	4.8	0.6	2.28	-0.44	0.46	-0.47	0.78
ILMN_1723048	GJC2	gap junction protein, gamma 2, 47kDa (GJC2), mRNA.	NM_020435.2	0.11	0.07	1.23	7.14	-0.32	0.84	0.72	6.13	1.04	7.88	1.12	4.28
ILMN_1773963	GNA15	guanine nucleotide binding protein (G protein), alpha 15 (Gq class) (GNA15), mRNA.	NM_002068.1	1.27	9.08	1.22	10.86	1.03	10.86	1.18	17.38	0.15	0.1	-0.05	0.02
ILMN_2174341	GPR83	G protein-coupled receptor 83 (GPR83), mRNA.	NM_016540.2	-0.51	1.73	1.4	12.3	-0.87	6.85	0.52	3.52	1.39	14.21	1.91	14
ILMN_1801043	GSN	gelsolin (amyloidosis, Finnish type) (GSN), transcript variant 2, mRNA.	NM_198252.2	1.24	3.15	1.74	7.55	1.2	8.36	1.36	13.68	0.17	0.07	0.49	0.38
ILMN_2211728	GUCA1B	guanylate cyclase activator 1B (retina) (GUCA1B), mRNA.	NM_002098.3	-0.3	0.56	2.43	21.27	-0.51	1.99	1.66	22.38	2.17	24.74	2.74	19.82
ILMN_1689264	GUCA1B	guanylate cyclase activator 1B (retina) (GUCA1B), mRNA.	NM_002098.4	-0.1	0.1	1.49	13.67	0.06	0.07	1.34	21.93	1.28	14.71	1.59	11.58
ILMN_2094266	HES2	hairy and enhancer of split 2 (Drosophila) (HES2), mRNA.	NM_019089.3	0.25	0.32	1.22	8.32	0.75	5.64	1.25	17.86	0.5	1.83	0.97	4.02
ILMN_1686478	HIST1H2AG	histone cluster 1, H2ag (HIST1H2AG), mRNA.	NM_021064.3	0.61	0.79	1.62	7.02	0.72	2.31	1.69	15.2	0.97	3.41	1.01	2.02
ILMN_1732071	HIST2H2BE	histone cluster 2, H2be (HIST2H2BE), mRNA.	NM_003528.2	1.3	5.5	0.63	2.12	1.52	9.84	1.35	10.42	-0.17	0.06	-0.67	1.43
ILMN_2053992	HIST4H4	histone cluster 4, H4 (HIST4H4), mRNA.	NM_175054.2	0.25	0.22	1.5	8.39	0.48	1.97	1.26	16.35	0.79	4.52	1.26	4.47
ILMN_1759676	HOXC13	homeobox C13 (HOXC13), mRNA.	NM_017410.2	0.75	2.3	1.51	10.02	1.88	15.82	1.04	7.4	-0.84	2.84	0.76	2.19
ILMN_2166457	HPGD	hydroxyprostaglandin dehydrogenase 15-(NAD) (HPGD), mRNA.	NM_000860.3	1.37	4.73	1.63	8.27	1.52	11.99	1.36	12.89	-0.16	0.06	0.26	0.11
ILMN_1863284		K-EST0218892 L18POOL1n1 cDNA clone L18POOL1n1-30-G08 5, mRNA sequence		0.74	3.77	1.33	11.97	0.82	5.04	1.42	17.4	0.6	2.03	0.58	2.22
ILMN_1904401		BX109999 Soares_fetal_liver_spleen_1NFLS_S1 cDNA clone IMAGp998G05975, mRNA sequence		-0.54	0.6	0.6	1.16	-0.9	4.76	0.45	1.68	1.35	9	1.14	2.53
ILMN_1852793		cDNA clone IMAGE:30332316		-0.3	0.7	0.99	8.65	-0.3	0.81	0.76	7.41	1.06	8.99	1.3	9.35
ILMN_1830069		BX106991 NCI_CGAP_GC4 cDNA clone IMAGp998C124026, mRNA sequence		0.4	1.34	1.5	15.37	0.08	0.1	1.13	17.45	1.05	10.81	1.1	8.01
ILMN_1850875		qy81d02.x5 NCI_CGAP_Brn25 cDNA clone IMAGE:2018403 3, mRNA sequence		-0.24	0.25	1	5.08	-0.19	0.25	0.91	7.69	1.1	7.11	1.24	5.03
ILMN_1887216		mRNA; cDNA DKFZp686B06256 (from clone DKFZp686B06256)		-0.57	1.13	2.67	17.62	-1.81	20.01	1.36	15.98	3.17	40.04	3.25	17.61
ILMN_1857335		cDNA FLJ35432 fis, clone SMINT2002311		0.98	3.36	1.2	6.57	1.15	7.43	0.89	6.18	-0.26	0.17	0.22	0.11
ILMN_1907947		mRNA; cDNA DKFZp686I14117 (from clone DKFZp686I14117)		-0.03	0.02	2.01	16.4	-0.03	0.03	1.49	19	1.52	14.15	2.03	13.41
ILMN_1904054		cDNA FLJ41747 fis, clone HSYRA2006873		1.18	6.98	1.45	11.77	1.32	9.39	1.2	10.42	-0.12	0.04	0.27	0.3
ILMN_1863962		BX116033 NCI_CGAP_Lu24 cDNA clone IMAGp998A155622, mRNA sequence		0.46	0.92	1.26	8.26	1.07	3.06	0.88	2.93	-0.19	0.04	0.8	2.62
ILMN_1886963		nw44h12.s1 NCI_CGAP_Ew1 cDNA clone IMAGE:1249511, mRNA sequence		0.03	0.02	1.58	14.65	0.23	0.49	1.96	34.35	1.73	22.12	1.55	11.24
ILMN_1887013		xj42a03.x1 Soares_NFL_T_GBC_S1 cDNA clone IMAGE:2659852 3, mRNA sequence		-1.06	6.19	1.1	8.6	-0.95	7.68	0.3	1.07	1.25	11.16	2.16	15.37
ILMN_1876379		AGENCOURT_10404673 NIH_MGC_82 cDNA clone IMAGE:6615135 5, mRNA sequence		-0.07	0.05	2.39	19.69	0.14	0.18	1.94	31.21	1.8	21.32	2.46	16.6
ILMN_1915188		cDNA FLJ41813 fis, clone NT2RI2011450		1.35	6.14	1.53	9.59	0.8	5.34	1.17	13.91	0.37	0.68	0.18	0.07
ILMN_1887008		BX105017 Soares_fetal_heart_NbHH19W cDNA clone IMAGp998A20842, mRNA sequence		-0.3	0.32	1.32	7.35	-0.28	0.54	0.85	7.08	1.13	7.82	1.62	7.2
ILMN_1836218		cDNA FLJ13116 fis, clone NT2RP3002659		0.45	0.64	1.01	4.48	1.43	11.71	1.75	20.54	0.31	0.29	0.55	0.84
ILMN_1836486		CR738291 library (Ebert L) cDNA clone IMAGp971D2453 ; IMAGE:811744 5, mRNA sequence		0.44	0.66	1.05	5.16	-0.07	0.05	1.34	11.95	1.41	8.87	0.61	1.15
ILMN_1899963		oc56e05.s1 NCI_CGAP_GCB1 cDNA clone IMAGE:1353728 3, mRNA sequence		-0.26	0.36	1.21	8.91	-0.72	3.73	0.41	1.68	1.13	7.69	1.47	8.63
ILMN_1837017		1008732 Human Fat Cell 5-Stretch Plus cDNA Library cDNA 5', mRNA sequence		0.26	0.82	1.82	22.42	0.05	0.07	1.62	37.38	1.56	27.83	1.56	15.83
ILMN_1911501		xi89f08.x1 NCI_CGAP_Mel3 cDNA clone IMAGE:2652999 3, mRNA sequence		0.21	0.19	1.72	11.46	0.08	0.06	1.37	12.39	1.29	7.43	1.51	7.15
ILMN_1891845		xa92d03.x1 NCI_CGAP_Co17 cDNA clone IMAGE:2574245 3, mRNA sequence		1.2	5.92	0.44	1.35	1.04	3.95	0.41	0.88	-0.62	0.91	-0.75	2.4
ILMN_1823803		mRNA full length insert cDNA clone EUROIMAGE 1090207		-0.2	0.24	1.59	12.3	-0.68	2.81	0.63	3.35	1.31	8.71	1.79	11.07
ILMN_1833212		cDNA FLJ34826 fis, clone NT2NE2008803		-0.16	0.14	1.13	6.29	0.27	0.39	1.47	14.25	1.19	6.6	1.29	5.49
ILMN_1838767		clone FP7915 unknown mRNA		1.35	6.87	1.47	9.89	1.44	12.48	1.06	9.6	-0.38	0.53	0.11	0.04
ILMN_1861057		hypothetical protein LOC338620, mRNA (cDNA clone IMAGE:6023208), partial cds		-0.28	0.28	2.12	13.24	-0.08	0.07	1.75	24.83	1.83	19.83	2.4	12.05
ILMN_1838407		UI-1-BB1p-aul-d-04-0-UI.s1 NCI_CGAP_Pl6 cDNA clone UI-1-BB1p-aul-d-04-0-UI 3, mRNA sequence		-0.91	2.52	0.19	0.2	-1.26	7.42	-0.12	0.14	1.14	5.18	1.09	3.36
ILMN_1913876		ig53c06.y1 HR85 islet cDNA 5, mRNA sequence		-0.11	0.13	1.51	15.95	-0.12	0.17	1.17	17.28	1.29	14.46	1.62	13.84
ILMN_1881081		AV705309 ADB cDNA clone ADBBWE05 5, mRNA sequence		1.91	8.83	1.26	6.25	1.66	7.95	1.51	8.84	-0.15	0.03	-0.64	1.13
ILMN_1829707		BX387364 NEUROBLASTOMA COT 25-NORMALIZED cDNA clone CS0DC006YA13 3-PRIME, mRNA sequence		0.38	0.63	1.02	6.13	0.33	1.05	1.18	16.19	0.84	6	0.65	1.74
ILMN_1816245		xs13d08.x1 NCI_CGAP_Kid11 cDNA clone IMAGE:2769519 3, mRNA sequence		0.72	1.62	1	4.4	0.48	0.84	1.29	8.38	0.81	1.86	0.28	0.17
ILMN_1753502	IGSF11	immunoglobulin superfamily, member 11 (IGSF11), transcript variant 2, mRNA.	NM_001015887.1	0.18	0.09	1.43	5.27	-0.26	0.22	1.04	4.83	1.3	4.54	1.25	2.75
ILMN_1724181	IL15	interleukin 15 (IL15), transcript variant 3, mRNA.	NM_000585.2	1.17	6.23	0.61	2.76	1.44	8.97	1.07	6.93	-0.37	0.3	-0.56	1.47
ILMN_2369221	IL15	interleukin 15 (IL15), transcript variant 1, mRNA.	NM_172174.1	1.09	3.25	0.11	0.08	1.23	9.27	0.87	6.53	-0.36	0.46	-0.98	2.48
ILMN_1691376	JAG1	jagged 1 (Alagille syndrome) (JAG1), mRNA.	NM_000214.1	1.11	4.07	1.02	4.84	1	5.89	0.85	5.89	-0.15	0.06	-0.09	0.02
ILMN_1744968	KCNAB1	potassium voltage-gated channel, shaker-related subfamily, beta member 1 (KCNAB1), transcript variant 2, mRNA.	NM_003471.2	0.56	0.91	1.23	5.93	-0.14	0.12	0.95	5.65	1.09	4.55	0.67	1.22
ILMN_1677968	KIAA0649	KIAA0649 (KIAA0649), mRNA.	NM_014811.3	0.43	0.52	1.14	5.12	0.8	4.57	1.15	11.97	0.36	0.5	0.72	1.36
ILMN_1700817	KIAA0774	KIAA0774 (KIAA0774), transcript variant 1, mRNA.	NM_001033602.2	1.09	4.78	1.05	6.02	1.59	10.84	1.18	8.38	-0.41	0.4	-0.05	0.01
ILMN_1669433	KIAA0913	KIAA0913 (KIAA0913), mRNA.	NM_015037.2	0.51	1.19	1.55	11.29	0.42	1.59	1.02	12.33	0.61	2.77	1.04	4.53
ILMN_2289093	KIAA1618	KIAA1618 (KIAA1618), mRNA.	NM_020954.2	1.38	8.24	1.54	11.97	0.98	7.53	1.62	22.19	0.64	2.5	0.16	0.08
ILMN_1735930	KLF2	Kruppel-like factor 2 (lung) (KLF2), mRNA.	NM_016270.2	0.24	0.2	1.68	9.59	-0.2	0.23	1.69	17.83	1.89	15.37	1.44	5.52
ILMN_1737406	KLF6	Kruppel-like factor 6 (KLF6), transcript variant 1, mRNA.	NM_001008490.1	0.22	0.13	1.33	5.07	0.72	2.9	1.97	22.88	1.25	7.39	1.11	2.41
ILMN_1735014	KLF6	Kruppel-like factor 6 (KLF6), transcript variant 2, mRNA.	NM_001300.4	0.37	0.27	1.23	3.97	0.66	3.08	1.72	22.34	1.06	6.79	0.86	1.24
ILMN_1695924	KLK11	kallikrein-related peptidase 11 (KLK11), transcript variant 2, mRNA.	NM_144947.1	1.09	8.25	1.11	10.72	1.3	13.47	1.16	14.29	-0.14	0.07	0.02	0.01
ILMN_1745570	KLK7	kallikrein-related peptidase 7 (KLK7), transcript variant 1, mRNA.	NM_005046.2	1.61	8.02	1.82	11.89	1.16	8.65	1.3	13.65	0.14	0.05	0.21	0.1
ILMN_1735712	KRT1	keratin 1 (epidermolytic hyperkeratosis) (KRT1), mRNA.	NM_006121.3	2.18	5.83	3.18	12.65	2.48	16.1	2.61	21.85	0.13	0.03	1	1.22
ILMN_1716093	KRT10	keratin 10 (epidermolytic hyperkeratosis; keratosis palmaris et plantaris) (KRT10), mRNA.	NM_000421.2	0.96	3.29	1.46	8.84	1.34	11.42	1.79	22.92	0.45	0.86	0.5	0.79
ILMN_1721218	KRT13	keratin 13 (KRT13), transcript variant 2, mRNA.	NM_002274.3	1.45	6.12	1.98	12.16	1.46	13.27	1.59	19.28	0.13	0.05	0.53	0.79
ILMN_1770612	KRT15	keratin 15 (KRT15), mRNA.	NM_002275.2	1.07	2.58	1.88	8.94	1.45	14.87	1.27	15.32	-0.18	0.1	0.81	1.32
ILMN_1736760	KRT16	keratin 16 (focal non-epidermolytic palmoplantar keratoderma) (KRT16), mRNA.	NM_005557.2	2.1	10.32	1.82	10.77	1.62	12.43	1.97	21.55	0.35	0.31	-0.28	0.16
ILMN_1730777	KRT19	keratin 19 (KRT19), mRNA.	NM_002276.3	0.37	0.76	1.14	8.53	1.04	9.21	1.19	15.08	0.15	0.08	0.77	3.1
ILMN_1744765	KRT4	keratin 4 (KRT4), mRNA.	NM_002272.2	1.52	3.42	2.56	10.41	2.3	24.14	2.23	28.19	-0.07	0.02	1.04	1.5
ILMN_2178226	KRT86	keratin 86 (KRT86), mRNA.	NM_002284.3	0.53	1.84	2.41	21.49	0.56	2.73	1.89	29.6	1.34	12.77	1.88	13.61
ILMN_1752968	LAMB2	laminin, beta 2 (laminin S) (LAMB2), mRNA.	NM_002292.3	0.64	0.71	1.63	6.17	1.72	11.67	1.57	12.97	-0.15	0.04	0.99	1.62
ILMN_2053415	LDLR	low density lipoprotein receptor (familial hypercholesterolemia) (LDLR), mRNA.	NM_000527.2	-0.2	0.13	0.99	3.44	0.63	3.12	1.2	13.6	0.56	1.83	1.2	3.17
ILMN_1660317	LEFTY1	left-right determination factor 1 (LEFTY1), mRNA.	NM_020997.2	0.82	2.47	2.33	15.73	0.62	3.74	2.18	37.53	1.56	17.81	1.52	6.86
ILMN_1785444	LEMD1	LEM domain containing 1 (LEMD1), mRNA.	NM_001001552.3	1.38	3.25	1.44	4.93	1.14	5.56	1.14	7.47	0	0	0.07	0.01
ILMN_1687960	LIMK2	LIM domain kinase 2 (LIMK2), transcript variant 2b, mRNA.	NM_016733.2	0.47	1.02	1.22	8.16	1.12	6.99	1.4	13.64	0.28	0.21	0.74	2.4
ILMN_1660624	LIMK2	LIM domain kinase 2 (LIMK2), transcript variant 1, mRNA.	NM_001031801.1	1.26	7.36	2.27	18.63	1.56	10.6	2.59	29.32	1.03	4.09	1.01	4.8
ILMN_1668194	LMTK3	PREDICTED: lemur tyrosine kinase 3 (LMTK3), mRNA.	XM_936372.2	0.51	1.36	1.08	7.54	1.23	7.55	1.12	8.55	-0.1	0.03	0.57	1.59
ILMN_1741506	LOC149134	hypothetical protein LOC149134 (LOC149134), mRNA.	NM_207326.1	-0.48	1.66	1.02	8.56	-0.64	3.48	0.5	2.95	1.13	9.16	1.5	10.9
ILMN_1703316	LOC255783	hypothetical protein LOC255783 (LOC255783) on chromosome 19.	NR_002797.1	0.81	3.51	1.02	7.01	0.96	5.24	1.26	11.63	0.31	0.26	0.2	0.15
ILMN_1715209	LOC283553	PREDICTED: hypothetical LOC283553 (LOC283553), misc RNA.	XR_017821.1	0.12	0.1	1.67	12.74	-0.41	1.34	1	10.62	1.41	13.28	1.56	8.84
ILMN_1759325	LOC283951	hypothetical protein LOC283951 (LOC283951), mRNA.	NM_001010878.1	-0.5	1.48	0.69	3.97	0.34	1.17	1.41	21.88	1.07	9.72	1.2	6.82
ILMN_1675803	LOC285550	PREDICTED: misc_RNA (LOC285550), miscRNA.	XR_017764.1	1.04	7.01	1.69	16.2	0.64	4.09	1.36	20.02	0.71	4.13	0.65	2.88
ILMN_1700436	LOC390856	PREDICTED: similar to 60S ribosomal protein L29 (P23) (LOC390856), mRNA.	XM_938867.1	0.12	0.12	2.28	19.96	0.1	0.15	1.62	30.84	1.52	21.32	2.16	15.4
ILMN_1713803	LOC400566	hypothetical gene supported by AK128660 (LOC400566), mRNA.	NM_001013672.3	1.53	12.76	0.85	7.37	1.1	13.23	0.93	12.91	-0.17	0.15	-0.68	3.49
ILMN_1707137	LOC400566	hypothetical gene supported by AK128660 (LOC400566), mRNA.	NM_001013672.3	1.4	12.94	0.69	6.31	1.01	11.3	0.91	12.28	-0.1	0.05	-0.71	4.48
ILMN_1713813	LOC400578	PREDICTED: similar to Keratin, type I cytoskeletal 14 (Cytokeratin-14) (CK-14) (Keratin-14) (K14) (LOC400578), mRNA.	XR_017543.1	1.56	9.28	1	6.24	1.38	7.42	1.75	14.67	0.37	0.26	-0.57	1.42
ILMN_1738546	LOC400578	PREDICTED: similar to Keratin, type I cytoskeletal 14 (Cytokeratin-14) (CK-14) (Keratin-14) (K14) (LOC400578), mRNA.	XR_017543.1	1.37	7.02	1.24	7.9	1.78	13.51	2.1	22.08	0.32	0.21	-0.13	0.05
ILMN_1770994	LOC440900	PREDICTED: hypothetical LOC440900 (LOC440900), mRNA.	XM_498909.3	-0.04	0.03	3.11	26.23	-0.17	0.2	2.61	39.39	2.77	33.62	3.15	22.48
ILMN_1765032	LOC440993	hypothetical gene supported by AK128346 (LOC440993), mRNA.	NM_001013714.1	1.16	7.39	1.74	15.41	1	6.7	1.93	25.31	0.93	4.85	0.58	1.97
ILMN_1743755	LOC441150	PREDICTED: similar to RIKEN cDNA 2310039H08 (LOC441150), mRNA.	XM_001134411.1	0.69	1.62	1.26	6.88	0.93	5.17	1.66	18.62	0.73	2.48	0.57	1.01
ILMN_1814820	LOC643109	PREDICTED: hypothetical protein LOC643109, transcript variant 2 (LOC643109), mRNA.	XM_932687.1	-0.16	0.11	1.19	5.79	-0.18	0.22	0.82	6.53	1	5.99	1.35	4.9
ILMN_1656630	LOC644891	PREDICTED: hypothetical protein LOC644891 (LOC644891), mRNA.	XM_927976.1	-0.04	0.04	1.53	14.7	0.01	0.01	1.11	13.13	1.1	8.8	1.57	12
ILMN_1766280	LOC645963	PREDICTED: similar to ubiquitin specific protease 6 (LOC645963), mRNA.	XM_928930.1	0.04	0.03	1.28	7.91	0.36	0.84	1.32	14.2	0.96	5.19	1.23	5.33
ILMN_1661470	LOC648931	PREDICTED: hypothetical protein LOC648931 (LOC648931), mRNA.	XM_943512.1	0.05	0.03	1.75	12.83	-0.03	0.02	1.43	19.72	1.46	14.6	1.71	9.53
ILMN_1653934	LOC650517	PREDICTED: hypothetical LOC650517 (LOC650517), mRNA.	XR_019109.1	1.15	5.34	1.5	10.35	1.3	4.96	1.92	13.37	0.62	0.69	0.35	0.41
ILMN_1808122	LOC652377	PREDICTED: similar to C1q and tumor necrosis factor related protein 4 (LOC652377), mRNA.	XR_019346.1	-0.11	0.09	1.39	9.41	-0.16	0.23	0.85	8.81	1	7.91	1.5	7.74
ILMN_1655949	LOC653107	PREDICTED: similar to Annexin A8 (Annexin VIII) (Vascular anticoagulant-beta) (VAC-beta), transcript variant 5 (LOC653107), mRNA.	XM_931353.1	0.67	0.82	1.11	3.37	1	3.37	1.27	7.21	0.26	0.1	0.45	0.27
ILMN_2064860	LOC653499	similar to Galectin-7 (Gal-7) (HKL-14) (PI7) (p53-induced protein 1) (LOC653499), mRNA.	NM_001042507.1	1.15	4.19	0.68	2.25	1.04	7.82	1.14	12.04	0.1	0.03	-0.47	0.61
ILMN_1668027	LOC727762	PREDICTED: similar to NADH dehydrogenase (ubiquinone) 1 beta subcomplex, 4, 15kDa, transcript variant 1 (LOC727762), mRNA.	XM_001125898.1	0	0	1.23	7.1	-0.49	1.74	0.6	3.74	1.09	7.41	1.23	4.98
ILMN_1758798	LOC728734	PREDICTED: similar to kidney-specific protein (KS), transcript variant 1 (LOC728734), mRNA.	XM_001132754.1	-0.1	0.06	1.19	6.18	0.72	2.6	1.3	10.83	0.58	1.14	1.29	4.92
ILMN_1797704	LOC729252	PREDICTED: similar to Keratin, type I cytoskeletal 14 (Cytokeratin-14) (CK-14) (Keratin-14) (K14) (LOC729252), mRNA.	XR_015937.1	1.49	6.96	1.29	7.35	1.4	7.14	1.94	16.28	0.54	0.62	-0.2	0.09
ILMN_1712755	LRRC41	leucine rich repeat containing 41 (LRRC41), mRNA.	NM_006369.4	0.66	2	1.19	7.83	0.64	1.88	1.01	6.5	0.37	0.32	0.53	1.18
ILMN_1696004	LRRK1	leucine-rich repeat kinase 1 (LRRK1), mRNA.	NM_024652.3	0.8	1.59	1.06	3.99	0.85	2.73	1.25	7.83	0.4	0.29	0.26	0.11
ILMN_1795464	LTA	lymphotoxin alpha (TNF superfamily, member 1) (LTA), mRNA.	NM_000595.2	-0.32	0.62	1.42	11.87	-0.81	5.93	0.93	10.21	1.74	20.33	1.74	11.9
ILMN_1722670	LYNX1	Ly6/neurotoxin 1 (LYNX1), transcript variant SLURP2, mRNA.	NM_177458.1	1.71	4.24	2.11	7.93	1.9	13.47	2.3	22.93	0.4	0.33	0.4	0.15
ILMN_2080080	MAP7D2	MAP7 domain containing 2 (MAP7D2), mRNA.	NM_152780.2	-0.05	0.03	2.09	16.8	-0.02	0.02	1.84	27.29	1.87	20.89	2.14	13.9
ILMN_1750748	MGC102966	PREDICTED: similar to Keratin, type I cytoskeletal 16 (Cytokeratin-16) (CK-16) (Keratin-16) (K16) (MGC102966), misc RNA.	XR_015970.1	1.52	9.08	0.92	5.6	1.18	5.11	1.58	11.57	0.4	0.28	-0.6	1.64
ILMN_2073758	MMP12	matrix metallopeptidase 12 (macrophage elastase) (MMP12), mRNA.	NM_002426.2	2.42	9.8	1.93	9.15	1.69	4.17	1.38	3.89	-0.31	0.06	-0.5	0.41
ILMN_1791508	MMP28	matrix metallopeptidase 28 (MMP28), transcript variant 1, mRNA.	NM_024302.3	0.96	2.1	1.66	7.66	1.28	8.63	1.31	11.78	0.03	0.01	0.71	1.01
ILMN_2148193	MPPED2	metallophosphoesterase domain containing 2 (MPPED2), mRNA.	NM_001584.1	1.28	3.97	1.29	5.56	2.2	11.43	1.4	6.77	-0.79	1.07	0.01	0
ILMN_1652147	MRPL43	mitochondrial ribosomal protein L43 (MRPL43), nuclear gene encoding mitochondrial protein, transcript variant 2, mRNA.	NM_176792.1	0.63	1.64	2.08	14.87	-0.41	1.19	0.77	5.82	1.18	8.46	1.46	7.11
ILMN_1756992	MUC1	mucin 1, cell surface associated (MUC1), transcript variant 6, mRNA.	NM_001044391.1	0.3	0.36	1.3	7.98	0.73	4.48	1.23	15.28	0.5	1.55	1	3.63
ILMN_2125346	MUC16	mucin 16, cell surface associated (MUC16), mRNA.	NM_024690.2	1.36	5.17	1.78	10.18	1.4	7.14	1.41	9.57	0.01	0	0.42	0.41
ILMN_1764764	MUM1	melanoma associated antigen (mutated) 1 (MUM1), mRNA.	NM_032853.2	0.82	3.13	1.42	10.02	0.77	5.44	1.18	15.46	0.42	1.08	0.59	1.49
ILMN_2341548	MYO5B	myosin VB (MYO5B), mRNA.	NM_001080467.1	1.14	4.66	0.93	4.53	1.07	4.7	1.17	7.6	0.11	0.03	-0.21	0.11
ILMN_1799487	N4BP2L1	NEDD4 binding protein 2-like 1 (N4BP2L1), transcript variant 2, mRNA.	NM_001079691.1	0.24	0.35	1.45	12.32	0.29	0.78	1.47	22.48	1.18	11.23	1.21	7.27
ILMN_2344650	N4BP2L1	NEDD4 binding protein 2-like 1 (N4BP2L1), transcript variant 2, mRNA.	NM_001079691.1	0.1	0.09	1.22	10.4	0.12	0.17	1.19	17.51	1.07	10.23	1.12	6.82
ILMN_2305225	NDRG4	NDRG family member 4 (NDRG4), mRNA.	NM_022910.1	2.59	12.02	2.18	12.07	2.52	9.74	2.1	9.24	-0.42	0.12	-0.4	0.32
ILMN_1794303	NDUFS6	NADH dehydrogenase (ubiquinone) Fe-S protein 6, 13kDa (NADH-coenzyme Q reductase) (NDUFS6), mRNA.	NM_004553.2	0.32	0.44	1.16	7.13	0.1	0.1	1.02	10.13	0.92	5.4	0.84	2.77
ILMN_2162253	NMU	neuromedin U (NMU), mRNA.	NM_006681.1	0.49	1.1	1.14	7.46	1	7.27	1.39	16.78	0.39	0.7	0.65	1.84
ILMN_1799589	NOXA1	NADPH oxidase activator 1 (NOXA1), mRNA.	NM_006647.1	0.89	1.99	1.34	5.97	1.27	10.21	1.14	11.14	-0.13	0.05	0.46	0.4
ILMN_2079786	NUAK1	NUAK family, SNF1-like kinase, 1 (NUAK1), mRNA.	NM_014840.2	1.23	6.3	0.29	0.62	1.03	7.99	0.58	3.58	-0.46	1.07	-0.93	3.71
ILMN_1787885	NUDT18	nudix (nucleoside diphosphate linked moiety X)-type motif 18 (NUDT18), mRNA.	NM_024815.3	1.3	9.1	1.82	16.76	1.51	18.12	2.17	36.65	0.66	3.27	0.52	1.69
ILMN_1797660	NXNL2	nucleoredoxin-like 2 (NXNL2), mRNA.	NM_145283.1	-0.28	0.52	0.93	6.91	0.17	0.31	1.72	30.47	1.55	19.88	1.21	7.45
ILMN_2116877	OLFM4	olfactomedin 4 (OLFM4), mRNA.	NM_006418.3	1.63	4.81	1.74	7.22	2.26	11.85	1.95	11.92	-0.31	0.1	0.11	0.02
ILMN_2203544	OR2A9P	olfactory receptor, family 2, subfamily A, member 9 pseudogene (OR2A9P) on chromosome 7.	NR_002157.1	0.78	3.96	1.97	18.11	0.64	2.98	1.38	16.14	0.74	3.16	1.19	7.57
ILMN_1722426	OR7D2	olfactory receptor, family 7, subfamily D, member 2 (OR7D2), mRNA.	NM_175883.1	0.31	0.58	1.51	13.05	0.7	3.45	1.62	20.15	0.92	4.91	1.21	7.27
ILMN_1734542	OVGP1	oviductal glycoprotein 1, 120kDa (mucin 9, oviductin) (OVGP1), mRNA.	NM_002557.3	0.07	0.06	1.37	12.3	0.19	0.29	1.18	13.69	0.99	6.63	1.31	8.72
ILMN_2099745	P53AIP1	p53-regulated apoptosis-inducing protein 1 (P53AIP1), mRNA.	NM_022112.1	0.32	0.4	2	13.75	0	0	1.05	13.88	1.06	9.6	1.68	8.4
ILMN_1812031	PALM	paralemmin (PALM), transcript variant 1, mRNA.	NM_002579.2	1.08	4.93	0.81	4.14	1.32	8.42	1.17	8.85	-0.16	0.05	-0.27	0.23
ILMN_1710495	PAPLN	papilin, proteoglycan-like sulfated glycoprotein (PAPLN), mRNA.	NM_173462.3	1.64	6.65	1.38	6.73	1.58	11.68	0.93	6	-0.65	1.51	-0.26	0.12
ILMN_1667592	PARVB	parvin, beta (PARVB), transcript variant 1, mRNA.	NM_001003828.1	-0.13	0.07	1.01	3.29	-0.21	0.23	0.82	4.72	1.03	4.48	1.13	2.66
ILMN_1784110	PCTK3	PCTAIRE protein kinase 3 (PCTK3), transcript variant 1, mRNA.	NM_212503.1	0.86	1.8	1.11	4.24	1.49	12.53	1.03	8.64	-0.46	0.79	0.25	0.1
ILMN_1653292	PFKFB4	6-phosphofructo-2-kinase/fructose-2,6-biphosphatase 4 (PFKFB4), mRNA.	NM_004567.2	0.66	1.2	2.22	12.64	-0.13	0.15	1.32	17.76	1.45	14.74	1.56	5.7
ILMN_1746135	PHF23	PHD finger protein 23 (PHF23), mRNA.	NM_024297.2	1.14	4.28	1.63	9.8	1.32	6.58	1.8	14.93	0.48	0.49	0.49	0.67
ILMN_1719986	PIK3IP1	phosphoinositide-3-kinase interacting protein 1 (PIK3IP1), mRNA.	NM_052880.3	1.49	7.36	1.35	8.22	1.92	8.65	1.03	3.6	-0.89	1.35	-0.14	0.05
ILMN_1663454	PKP1	plakophilin 1 (ectodermal dysplasia/skin fragility syndrome) (PKP1), transcript variant 1a, mRNA.	NM_001005337.1	0.79	2.35	1.36	8.12	1.24	8.01	1.33	11.8	0.08	0.02	0.57	1.07
ILMN_1708041	PLEKHF1	pleckstrin homology domain containing, family F (with FYVE domain) member 1 (PLEKHF1), mRNA.	NM_024310.4	0.14	0.14	1.39	10.69	0.18	0.24	1.29	14.16	1.11	7.26	1.25	6.77
ILMN_1742330	PLXNB1	plexin B1 (PLXNB1), mRNA.	NM_002673.3	0.91	1.97	1.81	8.85	1.03	8.15	1.42	18.15	0.39	0.74	0.9	1.76
ILMN_1806030	PPL	periplakin (PPL), mRNA.	NM_002705.4	-0.16	0.13	1.13	6.55	0.76	4.02	1.05	9.95	0.29	0.28	1.29	5.66
ILMN_1671365	PRODH	proline dehydrogenase (oxidase) 1 (PRODH), nuclear gene encoding mitochondrial protein, mRNA.	NM_016335.2	0.87	0.96	2.24	7.8	1.32	6.72	1.22	7.75	-0.1	0.02	1.37	2.24
ILMN_2339835	PTGS1	prostaglandin-endoperoxide synthase 1 (prostaglandin G/H synthase and cyclooxygenase) (PTGS1), transcript variant 2, mRNA.	NM_080591.1	0.34	0.58	1.16	7.91	0.72	3.62	1.02	9.45	0.3	0.31	0.82	3.02
ILMN_2337336	PVRL2	poliovirus receptor-related 2 (herpesvirus entry mediator B) (PVRL2), transcript variant delta, mRNA.	NM_001042724.1	0.52	0.71	1.2	5.16	0.66	2.5	1.42	13.93	0.75	2.54	0.68	1.09
ILMN_1718303	PVRL2	poliovirus receptor-related 2 (herpesvirus entry mediator B) (PVRL2), transcript variant alpha, mRNA.	NM_002856.2	0.72	1.59	1.56	8.57	0.52	1.53	1.05	8.44	0.53	1.08	0.84	1.97
ILMN_1677843	RAB24	RAB24, member RAS oncogene family (RAB24), transcript variant 1, mRNA.	NM_001031677.2	0.01	0.01	1.04	5.52	0.85	3.38	1.11	7.74	0.26	0.14	1.03	3.66
ILMN_1830985	RAD51AP2	RAD51-associated protein 2 (RAD51AP2), mRNA.	NM_001099218.2	0.84	4.27	1.15	9.33	0.5	1.57	1.07	9.39	0.56	1.41	0.31	0.49
ILMN_2206126	RAET1L	retinoic acid early transcript 1L (RAET1L), mRNA.	NM_130900.2	0.4	0.47	1.51	7.98	1.06	5.21	1.27	9.77	0.21	0.09	1.11	3.32
ILMN_1739810	RAI1	retinoic acid induced 1 (RAI1), mRNA.	NM_030665.3	0.44	0.35	1.22	3.7	0.94	4.56	1.02	7.3	0.09	0.02	0.78	0.92
ILMN_1758613	RAPGEFL1	Rap guanine nucleotide exchange factor (GEF)-like 1 (RAPGEFL1), mRNA.	NM_016339.2	0.56	1.79	1.05	7.67	1.01	6.82	0.8	6.03	-0.2	0.12	0.49	1.27
ILMN_1724806	RAPSN	receptor-associated protein of the synapse (RAPSN), transcript variant 1, mRNA.	NM_005055.3	-0.28	0.25	1.57	8.45	-0.71	2.47	0.87	5.18	1.58	10.23	1.85	7.82
ILMN_1747673	RASL10A	RAS-like, family 10, member A (RASL10A), transcript variant 2, mRNA.	NM_001007279.1	-0.42	0.78	0.76	3.73	-0.91	6.98	0.26	0.81	1.18	9.79	1.18	5.4
ILMN_1747968	RBM33	RNA binding motif protein 33 (RBM33), transcript variant 1, mRNA.	NM_001008408.3	-0.1	0.07	1.2	7.7	0.11	0.11	1.14	12.73	1.03	7.11	1.3	6.22
ILMN_1708025	RBPMS	RNA binding protein with multiple splicing (RBPMS), transcript variant 4, mRNA.	NM_006867.2	0.49	0.81	1.36	7.78	0.74	2.5	1.19	8.51	0.45	0.51	0.87	2.47
ILMN_1762803	RFXDC2	regulatory factor X domain containing 2 (RFXDC2), mRNA.	NM_022841.4	0.16	0.07	2.11	7.46	-0.24	0.23	1	5.5	1.24	5.15	1.95	4.59
ILMN_1809437	RHBDD2	rhomboid domain containing 2 (RHBDD2), transcript variant 1, mRNA.	NM_001040456.1	0.04	0.02	1.14	7.09	0.56	2.02	1.02	8.74	0.45	0.84	1.1	4.67
ILMN_1802205	RHOB	ras homolog gene family, member B (RHOB), mRNA.	NM_004040.2	0.54	0.46	1.73	6.12	0.9	2.73	3.02	29.25	2.12	12.46	1.19	2.05
ILMN_1698484	RHOV	ras homolog gene family, member V (RHOV), mRNA.	NM_133639.2	0	0	1.31	3.52	1.08	4.28	1.66	12.53	0.58	0.74	1.31	2.27
ILMN_1680018	RIPK4	receptor-interacting serine-threonine kinase 4 (RIPK4), mRNA.	NM_020639.2	0.43	0.6	1.62	9.49	1.77	11.61	1.58	12.45	-0.19	0.06	1.19	4.16
ILMN_1792389	RNF165	ring finger protein 165 (RNF165), mRNA.	NM_152470.2	0.61	0.5	1.76	5.63	1.25	5.47	1.76	13.26	0.5	0.48	1.15	1.67
ILMN_1800796	RPL37	ribosomal protein L37 (RPL37), mRNA.	NM_000997.3	0.65	3.07	1.81	17.44	0.63	2.67	1.51	17.37	0.87	4.18	1.16	7.85
ILMN_2298818	RPS29	ribosomal protein S29 (RPS29), transcript variant 2, mRNA.	NM_001030001.1	1.9	7.86	3.35	19.08	1.62	12.85	3.27	42.7	1.65	11.85	1.46	4.83
ILMN_1688780	S100A4	S100 calcium binding protein A4 (S100A4), transcript variant 2, mRNA.	NM_019554.2	0.97	1.44	1.64	5.54	1.42	4.44	1.38	5.68	-0.05	0.01	0.67	0.56
ILMN_1684306	S100A4	S100 calcium binding protein A4 (S100A4), transcript variant 2, mRNA.	NM_019554.2	0.73	0.79	1.36	4	1	2.58	0.94	3.18	-0.06	0.01	0.63	0.49
ILMN_1801216	S100P	S100 calcium binding protein P (S100P), mRNA.	NM_005980.2	1.51	7.39	1.48	9.28	0.58	1.3	1.23	8.1	0.65	1.17	-0.03	0.01
ILMN_1695687	SALL4	sal-like 4 (Drosophila) (SALL4), mRNA.	NM_020436.2	1.1	3.48	0.69	2.13	1.07	6.32	0.44	1.51	-0.63	1.62	-0.4	0.36
ILMN_1746265	SARM1	sterile alpha and TIR motif containing 1 (SARM1), mRNA.	NM_015077.2	0.21	0.21	1.65	11.52	0.29	0.81	1.1	14.59	0.81	5.51	1.44	7.11
ILMN_1753342	SAT1	spermidine/spermine N1-acetyltransferase 1 (SAT1), mRNA.	NM_002970.1	1.16	8.87	1.83	18.63	0.89	7.67	1.45	22.08	0.56	2.36	0.67	3.43
ILMN_1808811	SBNO2	strawberry notch homolog 2 (Drosophila) (SBNO2), transcript variant 1, mRNA.	NM_014963.2	0.32	0.32	1.24	6.09	0.69	2.78	1.26	11.59	0.57	1.29	0.93	2.39
ILMN_1794230	SCAND1	SCAN domain containing 1 (SCAND1), transcript variant 1, mRNA.	NM_016558.2	0.53	1.26	1.18	7.7	0.74	5.16	1.21	16.31	0.47	1.52	0.65	1.79
ILMN_1703178	SCG2	secretogranin II (chromogranin C) (SCG2), mRNA.	NM_003469.3	-0.49	1.2	0.87	5.14	-0.61	2.14	0.63	3.22	1.24	7.48	1.36	7.38
ILMN_2065773	SCG5	secretogranin V (7B2 protein) (SCG5), mRNA.	NM_003020.1	-0.14	0.14	1.41	10.97	-0.78	4.75	0.71	5.36	1.49	13.83	1.55	9.41
ILMN_1655347	SCGB1A1	secretoglobin, family 1A, member 1 (uteroglobin) (SCGB1A1), mRNA.	NM_003357.3	2.02	3.41	2.91	8.35	2.41	12.75	2.77	20.23	0.36	0.13	0.88	0.53
ILMN_1713995	SCNN1A	sodium channel, nonvoltage-gated 1 alpha (SCNN1A), mRNA.	NM_001038.4	1.17	5.38	1.89	13.43	1.59	12.07	1.24	10.18	-0.35	0.32	0.71	2
ILMN_1705107	SDCBP2	syndecan binding protein (syntenin) 2 (SDCBP2), transcript variant 2, mRNA.	NM_015685.4	1.68	8.9	2.03	13.98	1.91	12.73	2.31	21.85	0.4	0.3	0.35	0.35
ILMN_2376822	SDCBP2	syndecan binding protein (syntenin) 2 (SDCBP2), transcript variant 2, mRNA.	NM_015685.3	1.42	4.48	1.78	8.52	0.98	3.05	1.72	11.8	0.74	1.19	0.36	0.2
ILMN_1700310	SDCBP2	syndecan binding protein (syntenin) 2 (SDCBP2), transcript variant 1, mRNA.	NM_080489.3	1.55	7.15	1.63	9.84	1.64	7.46	2.06	14.57	0.43	0.24	0.08	0.02
ILMN_2317493	SEMA6D	sema domain, transmembrane domain (TM), and cytoplasmic domain, (semaphorin) 6D (SEMA6D), transcript variant 6, mRNA.	NM_024966.2	1.01	3.65	0.06	0.05	1.09	4.87	0.11	0.1	-0.98	3.19	-0.95	3.01
ILMN_1789627	2005-09-01	septin 5 (SEPT5), mRNA.	NM_002688.4	1.37	6.91	1.18	7.28	1.09	7.35	0.74	4.82	-0.35	0.4	-0.18	0.09
ILMN_1679133	SERPINB1	serpin peptidase inhibitor, clade B (ovalbumin), member 1 (SERPINB1), mRNA.	NM_030666.2	0.32	0.72	1.01	8.6	0.73	3.06	1.25	11.26	0.51	0.99	0.69	3.21
ILMN_1769759	SERPINB13	serpin peptidase inhibitor, clade B (ovalbumin), member 13 (SERPINB13), mRNA.	NM_012397.2	1.09	7.63	0.94	7.95	1.07	9.46	0.69	5.67	-0.38	0.76	-0.15	0.11
ILMN_1762605	SERPINC1	serpin peptidase inhibitor, clade C (antithrombin), member 1 (SERPINC1), mRNA.	NM_000488.2	-0.09	0.08	2.02	17.91	-0.36	1.32	1.23	18.03	1.59	19.72	2.11	15.21
ILMN_1807737	SFRS17A	splicing factor, arginine/serine-rich 17A (SFRS17A), mRNA.	NM_005088.2	-0.21	0.18	1.01	4.9	-0.33	1.11	0.78	8.46	1.11	10.77	1.22	4.58
ILMN_1791912	SIDT2	SID1 transmembrane family, member 2 (SIDT2), mRNA.	NM_001040455.1	0.14	0.14	1.12	8.13	0.39	0.98	1.07	9.98	0.68	2.42	0.98	4.67
ILMN_1709399	SLC25A34	solute carrier family 25, member 34 (SLC25A34), mRNA.	NM_207348.1	-0.24	0.32	1.21	8.86	0.03	0.02	1.21	13.36	1.18	8.71	1.45	8.43
ILMN_1810025	SLC39A2	solute carrier family 39 (zinc transporter), member 2 (SLC39A2), mRNA.	NM_014579.1	1.58	3.34	2.11	7.42	1.63	8.81	1.4	8.81	-0.23	0.08	0.53	0.27
ILMN_2246188	SLC45A2	solute carrier family 45, member 2 (SLC45A2), transcript variant 1, mRNA.	NM_016180.3	-0.1	0.11	1.5	14.47	0.1	0.13	1.15	18.42	1.05	11.22	1.6	12.31
ILMN_1726114	SLC45A3	solute carrier family 45, member 3 (SLC45A3), mRNA.	NM_033102.2	0.44	1.2	1.65	14.47	0.41	1.41	1.03	11.76	0.62	2.7	1.21	7.36
ILMN_1678928	SLCO3A1	solute carrier organic anion transporter family, member 3A1 (SLCO3A1), mRNA.	NM_013272.2	0.26	0.36	1.03	6.84	0.92	6.12	1.16	12.37	0.24	0.2	0.77	2.77
ILMN_2114720	SLPI	secretory leukocyte peptidase inhibitor (SLPI), mRNA.	NM_003064.2	1.02	2.58	1.52	7.06	0.9	1.47	1.11	3.23	0.21	0.04	0.49	0.47
ILMN_1669210	SNORD16	small nucleolar RNA, C/D box 16 (SNORD16) on chromosome 15.	NR_002440.1	0.12	0.07	1.65	7.91	-0.21	0.21	1.04	6.4	1.25	5.79	1.53	4.95
ILMN_1784328	SNORD25	small nucleolar RNA, C/D box 25 (SNORD25) on chromosome 11.	NR_002565.1	0.21	0.15	1.64	8.89	0.07	0.05	1.6	15.99	1.53	10.3	1.43	5.18
ILMN_1694367	SNORD35B	small nucleolar RNA, C/D box 35B (SNORD35B) on chromosome 19.	NR_001285.1	0.35	0.32	1.5	7.13	0.56	1.63	1.31	11.68	0.76	2.37	1.15	3.11
ILMN_1681135	SPATA2	spermatogenesis associated 2 (SPATA2), mRNA.	NM_006038.2	0.16	0.23	1.13	10.28	-0.45	2.27	0.58	5.14	1.03	9.85	0.97	5.98
ILMN_1781221	SPDYA	speedy homolog A (Drosophila) (SPDYA), transcript variant 2, mRNA.	NM_182756.2	-0.54	0.99	0.69	2.42	-0.45	1.22	0.99	8.17	1.44	10.77	1.23	4.6
ILMN_1656287	SPOCK2	sparc/osteonectin, cwcv and kazal-like domains proteoglycan (testican) 2 (SPOCK2), mRNA.	NM_014767.1	-1.2	5.3	0.83	3.91	-1.26	8.72	0.03	0.03	1.3	8.01	2.03	11.04
ILMN_1676099	SPON2	spondin 2, extracellular matrix protein (SPON2), mRNA.	NM_012445.1	0.78	1.05	1.15	3.37	1.03	4.54	1	5.86	-0.03	0.01	0.37	0.16
ILMN_1716591	SPRR1A	small proline-rich protein 1A (SPRR1A), mRNA.	NM_005987.2	1.13	1.93	1.67	5.61	0.77	3.11	1.52	14.69	0.75	2.32	0.54	0.32
ILMN_1711174	SPRR1B	small proline-rich protein 1B (cornifin) (SPRR1B), mRNA.	NM_003125.2	1.1	1.85	1.4	4.17	1.55	10.22	2	19.76	0.44	0.47	0.3	0.08
ILMN_1663035	SREBF1	sterol regulatory element binding transcription factor 1 (SREBF1), transcript variant 1, mRNA.	NM_001005291.1	0.55	1.37	1.22	7.99	1.04	5.94	0.92	6.33	-0.12	0.04	0.66	1.85
ILMN_1717052	STARD10	StAR-related lipid transfer (START) domain containing 10 (STARD10), mRNA.	NM_006645.2	0.6	1.52	1.07	6.33	0.74	2.24	1.04	6.07	0.3	0.16	0.47	0.84
ILMN_2341254	STARD13	START domain containing 13 (STARD13), transcript variant alpha, mRNA.	NM_178006.1	1.12	2.4	1.36	4.88	1.3	5.74	1.29	7.64	-0.01	0	0.24	0.07
ILMN_1727805	SYNGR1	synaptogyrin 1 (SYNGR1), transcript variant 1a, mRNA.	NM_004711.3	0.75	3.19	1.46	11.81	1.08	8.47	1	9.73	-0.08	0.03	0.71	2.61
ILMN_1750785	SYTL1	synaptotagmin-like 1 (SYTL1), mRNA.	NM_032872.1	0.45	0.42	1.4	5.47	1.11	4.78	1	5.38	-0.11	0.02	0.95	1.74
ILMN_1710434	TBC1D10C	TBC1 domain family, member 10C (TBC1D10C), mRNA.	NM_198517.2	0.15	0.16	1.7	13.75	-0.5	2.41	0.57	4.38	1.07	9.24	1.55	9.41
ILMN_2153679	TBC1D3B	TBC1 domain family, member 3B (TBC1D3B), mRNA.	NM_001001417.4	0.61	0.49	1.87	6.16	1.3	6.24	1.69	13.2	0.39	0.28	1.26	2
ILMN_1693802	TBC1D3C	TBC1 domain family, member 3C (TBC1D3C), mRNA.	NM_001001418.2	0.76	0.76	1.8	5.69	0.76	1.96	1.23	7.01	0.47	0.4	1.03	1.28
ILMN_2068991	TBC1D3G	TBC1 domain family, member 3G (TBC1D3G), mRNA.	NM_001040282.1	0.46	0.29	1.83	5.69	0.73	2.15	1.43	10.73	0.7	1.44	1.38	2.24
ILMN_1726928	TCEA3	transcription elongation factor A (SII), 3 (TCEA3), mRNA.	NM_003196.1	1.08	5.23	1.45	10.6	1.39	12.84	0.9	7.83	-0.49	1.2	0.37	0.54
ILMN_2398403	TCEAL1	transcription elongation factor A (SII)-like 1 (TCEAL1), transcript variant 2, mRNA.	NM_001006639.1	1.07	3.37	0.27	0.35	1.12	8.36	0.62	3.78	-0.49	1.13	-0.8	1.77
ILMN_2083946	TGFA	transforming growth factor, alpha (TGFA), mRNA.	NM_003236.1	-0.21	0.15	0.8	2.41	0.43	1.1	1.11	9.99	0.68	2.25	1.01	2.4
ILMN_1784287	TGFBR3	transforming growth factor, beta receptor III (TGFBR3), mRNA.	NM_003243.2	0.27	0.42	1.34	10.62	1.46	15.85	1.22	15.02	-0.24	0.23	1.07	5.56
ILMN_1686116	THBS1	thrombospondin 1 (THBS1), mRNA.	NM_003246.2	2.5	6.21	1.93	5.52	1.49	3.87	1.86	8	0.37	0.1	-0.57	0.25
ILMN_1724863	TICAM1	toll-like receptor adaptor molecule 1 (TICAM1), transcript variant 2, mRNA.	NM_182919.1	0.45	0.59	1.1	4.94	0.25	0.53	1.04	11.97	0.79	4.55	0.65	1.14
ILMN_1651346	TICAM2	toll-like receptor adaptor molecule 2 (TICAM2), mRNA.	NM_021649.3	-0.32	0.66	0.89	6.62	-1.02	10.46	0.17	0.42	1.19	12.22	1.21	7.56
ILMN_1701461	TIMP3	TIMP metallopeptidase inhibitor 3 (Sorsby fundus dystrophy, pseudoinflammatory) (TIMP3), mRNA.	NM_000362.4	1.48	3.42	1.33	3.94	1.19	2.82	0.68	1.3	-0.5	0.23	-0.16	0.03
ILMN_1748899	TMED6	transmembrane emp24 protein transport domain containing 6 (TMED6), mRNA.	NM_144676.2	-0.07	0.05	1.79	12.66	-0.77	3.68	1.1	9.81	1.87	16.79	1.86	10.29
ILMN_1770977	TMEM134	transmembrane protein 134 (TMEM134), transcript variant 2, mRNA.	NM_001078650.1	0.28	0.3	1.03	5.13	0.72	4.96	1.12	14.53	0.4	1.02	0.75	1.84
ILMN_2104295	TMEM178	transmembrane protein 178 (TMEM178), mRNA.	NM_152390.1	0.37	0.75	1.17	8.54	0.6	4.1	1.08	15.99	0.49	2.1	0.79	3.13
ILMN_1794560	TMEM93	transmembrane protein 93 (TMEM93), transcript variant 1, mRNA.	NM_001014764.1	-0.16	0.09	1.16	4.73	0.39	0.76	2.13	24.73	1.74	13.13	1.31	3.97
ILMN_1727689	TNFAIP2	tumor necrosis factor, alpha-induced protein 2 (TNFAIP2), mRNA.	NM_006291.2	0.36	0.24	1.87	7.15	1.73	9.74	1.27	7.4	-0.46	0.37	1.5	3.41
ILMN_1697409	TNFRSF14	tumor necrosis factor receptor superfamily, member 14 (herpesvirus entry mediator) (TNFRSF14), mRNA.	NM_003820.2	1.01	5.1	1.41	10.8	1.48	11.76	1.27	11.87	-0.2	0.1	0.39	0.69
ILMN_1758418	TNFSF13B	tumor necrosis factor (ligand) superfamily, member 13b (TNFSF13B), mRNA.	NM_006573.3	-0.99	6.43	0.85	6.71	-0.83	7.78	0.56	5	1.39	17.12	1.84	14.23
ILMN_1751464	TNFSF9	tumor necrosis factor (ligand) superfamily, member 9 (TNFSF9), mRNA.	NM_003811.2	-0.72	2.34	1.03	6.22	0.68	2.77	1.45	14.97	0.77	2.78	1.75	9.82
ILMN_1664071	TNNT2	troponin T type 2 (cardiac) (TNNT2), transcript variant 1, mRNA.	NM_000364.2	0.05	0.03	1	4.1	0.64	1.73	1.09	6.81	0.44	0.45	0.95	2.4
ILMN_1667893	TNS3	tensin 3 (TNS3), mRNA.	NM_022748.10	1.09	9.45	0.76	7.28	1.15	11.55	0.43	2.4	-0.73	4.06	-0.33	1
ILMN_2214197	TP53INP1	tumor protein p53 inducible nuclear protein 1 (TP53INP1), mRNA.	NM_033285.2	1.31	2.63	0.59	0.81	1.31	3.5	0.63	1.11	-0.69	0.53	-0.72	0.67
ILMN_2278152	TPM1	tropomyosin 1 (alpha) (TPM1), transcript variant 6, mRNA.	NM_001018008.1	1.26	3.45	0.94	2.87	0.35	0.67	1.58	16.81	1.23	7.38	-0.32	0.15
ILMN_1740185	TPMT	thiopurine S-methyltransferase (TPMT), mRNA.	NM_000367.2	0.59	2.5	1.35	12.38	0.52	3.12	1.39	23.14	0.87	7.28	0.76	3.78
ILMN_1785010	TPTE2	transmembrane phosphoinositide 3-phosphatase and tensin homolog 2 (TPTE2), transcript variant 1, mRNA.	NM_130785.2	0.04	0.04	1.25	12.23	0.27	0.75	1.52	24.78	1.25	13.22	1.21	8.86
ILMN_2339234	TRIM16	tripartite motif-containing 16 (TRIM16), mRNA.	NM_006470.3	0.65	0.9	1.07	3.52	1.11	5.73	1.08	7.45	-0.02	0	0.41	0.26
ILMN_1748685	TRIM31	tripartite motif-containing 31 (TRIM31), mRNA.	NM_007028.3	1.21	1.56	2.79	9.32	2.22	10.73	2	11.72	-0.22	0.05	1.58	2.48
ILMN_1712708	TRIM47	tripartite motif-containing 47 (TRIM47), mRNA.	NM_033452.2	0.94	1.5	1.03	2.68	1.17	5.69	0.54	1.72	-0.63	1.12	0.09	0.01
ILMN_1813430	TRIM69	tripartite motif-containing 69 (TRIM69), transcript variant a, mRNA.	NM_182985.3	0.19	0.24	1.44	11.79	-0.05	0.05	1.16	20.11	1.2	15.44	1.25	7.23
ILMN_2376403	TSC22D3	TSC22 domain family, member 3 (TSC22D3), transcript variant 2, mRNA.	NM_004089.3	0.64	1.79	1.2	7.64	1.13	6.54	1.55	15.02	0.42	0.52	0.56	1.24
ILMN_1723381	TSSK4	testis-specific serine kinase 4 (TSSK4), mRNA.	NM_174944.2	0.01	0	1.25	8.97	-0.19	0.36	0.89	10.72	1.08	10.23	1.24	6.47
ILMN_1794612	UBA7	ubiquitin-like modifier activating enzyme 7 (UBA7), mRNA.	NM_003335.2	0.5	0.83	1.04	5.02	1.02	6.08	0.97	7.48	-0.05	0.01	0.54	0.87
ILMN_2084073	UCN	urocortin (UCN), mRNA.	NM_003353.2	-0.13	0.09	0.9	3.84	-0.22	0.27	0.85	5.58	1.07	5.46	1.04	3.26
ILMN_1652413	UCN2	urocortin 2 (UCN2), mRNA.	NM_033199.3	1.1	2.47	1.94	8.79	0.99	5.92	1.24	11.79	0.25	0.17	0.84	1.32
ILMN_1655637	UPK1A	uroplakin 1A (UPK1A), mRNA.	NM_007000.2	-0.44	0.83	1.79	13.02	-1.42	12.97	0.6	3.59	2.03	20.93	2.23	13.33
ILMN_1773313	USMG5	upregulated during skeletal muscle growth 5 homolog (mouse) (USMG5), mRNA.	NM_032747.2	0.5	0.57	1.71	7.95	0.67	2.5	2.34	28.73	1.66	12.41	1.2	3.05
ILMN_1809467	VAMP5	vesicle-associated membrane protein 5 (myobrevin) (VAMP5), mRNA.	NM_006634.2	0.19	0.12	2.22	11.8	0.75	2.48	2.01	19.7	1.25	5.85	2.04	7.87
ILMN_1700147	VPREB3	pre-B lymphocyte gene 3 (VPREB3), mRNA.	NM_013378.1	-0.12	0.09	1.07	5.89	-0.12	0.15	0.93	11.02	1.05	9.2	1.19	4.87
ILMN_1721575	VPS18	vacuolar protein sorting 18 homolog (S. cerevisiae) (VPS18), mRNA.	NM_020857.2	-0.05	0.02	1.04	2.71	0.78	2.76	1.05	6.75	0.27	0.14	1.09	1.85
ILMN_2151114	VSNL1	visinin-like 1 (VSNL1), mRNA.	NM_003385.4	0.47	0.61	1.07	4.35	1.39	9.07	1.6	15.08	0.22	0.09	0.59	0.83
ILMN_1676413	VSNL1	visinin-like 1 (VSNL1), mRNA.	NM_003385.4	0.91	4.07	1.28	9.24	1.08	9.66	1.19	14.88	0.11	0.05	0.37	0.54
ILMN_1753101	VTCN1	V-set domain containing T cell activation inhibitor 1 (VTCN1), mRNA.	NM_024626.2	0.68	1.1	1.41	6.22	0.96	4.17	1.07	7.04	0.11	0.03	0.73	1.16
ILMN_1752755	VWF	von Willebrand factor (VWF), mRNA.	NM_000552.3	1.29	2.08	2.59	9.32	1.94	10	2.02	13.79	0.07	0.01	1.3	1.94
ILMN_1740415	WFDC3	WAP four-disulfide core domain 3 (WFDC3), mRNA.	NM_080614.1	0.63	0.74	1.31	4.62	1.11	3.4	0.7	1.87	-0.41	0.21	0.69	0.79
ILMN_2308903	WFDC3	WAP four-disulfide core domain 3 (WFDC3), transcript variant 2, mRNA.	NM_181522.1	1.26	2.84	1.85	7.52	1.77	6.12	1.08	3.26	-0.68	0.52	0.59	0.51
ILMN_1658426	WNT10A	wingless-type MMTV integration site family, member 10A (WNT10A), mRNA.	NM_025216.2	0.5	0.69	1.49	7.51	1.39	7.88	1.25	8.58	-0.14	0.04	0.99	2.5
ILMN_1778575	WNT7A	wingless-type MMTV integration site family, member 7A (WNT7A), mRNA.	NM_004625.3	0.27	0.21	1.06	3.91	1.01	6.87	1.41	16.01	0.4	0.65	0.79	1.4
ILMN_1791147	YPEL3	yippee-like 3 (Drosophila) (YPEL3), mRNA.	NM_031477.4	1.06	2.84	1.34	5.96	1.46	6.07	0.94	3.56	-0.52	0.42	0.28	0.12
ILMN_2061732	YRDC	yrdC domain containing (E. coli) (YRDC), mRNA.	NM_024640.3	-0.79	3.18	0.27	0.57	-0.9	7.08	0.35	1.54	1.25	11.44	1.06	5.01
ILMN_1751127	ZFP42	zinc finger protein 42 homolog (mouse) (ZFP42), mRNA.	NM_174900.3	0.66	1.41	1.09	5.3	0.85	4.16	1.01	7.83	0.16	0.06	0.43	0.5
ILMN_1786722	ZNF385A	zinc finger protein 385A (ZNF385A), mRNA.	NM_015481.1	0.79	0.87	1.75	5.82	1.26	7.95	1.26	10.45	0	0	0.96	1.21
ILMN_1683932	ZNF425	zinc finger protein 425 (ZNF425), mRNA.	NM_001001661.1	0.36	0.49	1.32	7.76	0.23	0.25	1.31	10.5	1.08	4.63	0.95	3.12
ILMN_1679093	ZNF581	zinc finger protein 581 (ZNF581), mRNA.	NM_016535.3	0.32	0.49	1.46	10.64	0.69	4.28	1.21	15.43	0.51	1.73	1.14	5.38
ILMN_1810891	ZNF629	PREDICTED: zinc finger protein 629 (ZNF629), mRNA.	XM_034819.6	0.19	0.07	1.16	2.39	1.07	2.35	0.99	2.83	-0.08	0.01	0.97	0.99
ILMN_1698189	AASDHPPT	aminoadipate-semialdehyde dehydrogenase-phosphopantetheinyl transferase (AASDHPPT), mRNA.	NM_015423.2	0.68	1.04	-0.73	1.83	-0.75	3.18	-1.19	10.41	-0.45	0.68	-1.42	4.08
ILMN_1697585	ACTR6	ARP6 actin-related protein 6 homolog (yeast) (ACTR6), mRNA.	NM_022496.3	0.42	0.86	-1.08	7.22	-0.67	2.67	-1.23	11.27	-0.55	1.25	-1.49	8.47
ILMN_2064917	AGGF1	angiogenic factor with G patch and FHA domains 1 (AGGF1), mRNA.	NM_018046.3	0.41	0.72	-1.17	7.5	-0.12	0.14	-1.07	12.35	-0.95	6.58	-1.58	8.43
ILMN_1698209	AGPS	alkylglycerone phosphate synthase (AGPS), mRNA.	NM_003659.1	0.35	0.48	-0.78	3.46	-0.98	6.03	-1.22	11.92	-0.24	0.16	-1.13	4.48
ILMN_1779190	ALKBH8	alkB, alkylation repair homolog 8 (E. coli) (ALKBH8), mRNA.	NM_138775.1	-0.24	0.07	-1.71	2.97	-0.65	0.99	-1.31	5.82	-0.66	0.64	-1.47	1.37
ILMN_1660995	AMH	anti-Mullerian hormone (AMH), mRNA.	NM_000479.2	-1.07	4.6	-0.74	3.37	-1.44	13.54	-1.11	11.38	0.32	0.4	0.33	0.33
ILMN_1765091	ANKHD1	ankyrin repeat and KH domain containing 1 (ANKHD1), transcript variant 1, mRNA.	NM_017747.1	-0.25	0.59	-1.28	13.72	-0.76	4.73	-1.59	22.11	-0.83	4.72	-1.03	7.85
ILMN_1756417	ANKRD37	ankyrin repeat domain 37 (ANKRD37), mRNA.	NM_181726.2	-0.6	2.08	-1.56	12.81	-0.71	4.22	-1.34	17.29	-0.63	2.59	-0.96	4.64
ILMN_1669259	ANKRD49	ankyrin repeat domain 49 (ANKRD49), mRNA.	NM_017704.2	0.39	0.53	-0.71	2.55	-0.72	2.72	-1.15	9.17	-0.44	0.58	-1.1	3.77
ILMN_1739645	ANLN	anillin, actin binding protein (ANLN), mRNA.	NM_018685.2	-0.02	0.01	-1.1	2.99	-0.56	0.93	-1.3	7.16	-0.74	1.19	-1.08	1.81
ILMN_1676946	AP3M2	adaptor-related protein complex 3, mu 2 subunit (AP3M2), mRNA.	NM_006803.2	-0.4	0.77	-1.03	6.66	-0.47	2.29	-1.13	15.8	-0.66	3.76	-0.63	1.81
ILMN_1669377	AP4B1	adaptor-related protein complex 4, beta 1 subunit (AP4B1), mRNA.	NM_006594.1	-0.41	1.17	-1.13	9.68	-0.53	2.86	-1.22	17.21	-0.69	3.86	-0.71	3.26
ILMN_1740772	APBB3	amyloid beta (A4) precursor protein-binding, family B, member 3 (APBB3), transcript variant 3, mRNA.	NM_133172.2	0.18	0.12	-0.92	3.49	0.28	0.48	-1.1	9.86	-1.38	10.06	-1.1	3.16
ILMN_2320513	APBB3	amyloid beta (A4) precursor protein-binding, family B, member 3 (APBB3), transcript variant 2, mRNA.	NM_133173.2	0.36	0.43	-0.75	2.74	0.02	0.01	-1.16	13.1	-1.18	9.2	-1.1	3.69
ILMN_1762606	AQP11	aquaporin 11 (AQP11), mRNA.	NM_173039.1	-0.28	0.31	-1.29	7.74	-0.76	4.9	-1.12	13.21	-0.36	0.67	-1.02	3.61
ILMN_1688953	ARHGAP19	Rho GTPase activating protein 19 (ARHGAP19), mRNA.	NM_032900.4	-0.84	3.24	-1.22	8.09	-0.61	1.39	-1.22	7.61	-0.61	0.91	-0.37	0.52
ILMN_1775405	ARL4A	ADP-ribosylation factor-like 4A (ARL4A), transcript variant 1, mRNA.	NM_005738.3	2.34	3.31	-0.33	0.13	-1.19	2.35	-1.62	5.97	-0.43	0.13	-2.67	3.92
ILMN_1771822	ARL6	ADP-ribosylation factor-like 6 (ARL6), transcript variant 2, mRNA.	NM_177976.1	-1.12	5.12	-1.69	12.12	-0.48	1.3	-1	7.8	-0.52	1.06	-0.58	1.33
ILMN_1741156	ARMCX5	armadillo repeat containing, X-linked 5 (ARMCX5), mRNA.	NM_022838.2	0.27	0.29	-1.07	5.78	-0.53	1.66	-1.28	12.46	-0.75	2.75	-1.34	5.81
ILMN_1796417	ASNS	asparagine synthetase (ASNS), transcript variant 1, mRNA.	NM_133436.1	-0.35	0.62	-1.14	8.01	-0.73	2.49	-1.02	6.7	-0.3	0.19	-0.79	3.01
ILMN_1680955	AURKA	aurora kinase A (AURKA), transcript variant 5, mRNA.	NM_198436.1	-0.44	0.77	-1.92	13.18	-0.82	4.51	-2.13	29.09	-1.31	9.72	-1.47	6.96
ILMN_2357438	AURKA	aurora kinase A (AURKA), transcript variant 3, mRNA.	NM_198434.1	-0.61	1.48	-1.88	13.02	-0.96	5.99	-2.38	33.25	-1.43	11.17	-1.27	5.61
ILMN_1691410	BAMBI	BMP and activin membrane-bound inhibitor homolog (Xenopus laevis) (BAMBI), mRNA.	NM_012342.2	-0.81	0.46	-1.6	2.68	-1.23	1.11	-1.39	2.09	-0.16	0.01	-0.79	0.32
ILMN_2074258	BARD1	BRCA1 associated RING domain 1 (BARD1), mRNA.	NM_000465.1	-0.78	2.01	-1.19	6.13	-0.82	2.6	-1.37	9.47	-0.55	0.71	-0.41	0.44
ILMN_1658327	BAZ1A	bromodomain adjacent to zinc finger domain, 1A (BAZ1A), transcript variant 1, mRNA.	NM_013448.2	-0.88	0.84	-1.6	4.04	-0.78	1.45	-1.25	5.29	-0.47	0.26	-0.73	0.46
ILMN_1720850	BAZ2B	bromodomain adjacent to zinc finger domain, 2B (BAZ2B), mRNA.	NM_013450.2	0.68	2	-1.05	6.16	-0.72	3.63	-1.62	20.05	-0.9	4.63	-1.73	9.37
ILMN_1752899	BCL11A	B-cell CLL/lymphoma 11A (zinc finger protein) (BCL11A), transcript variant 1, mRNA.	NM_022893.2	1.41	10.36	-0.15	0.26	1.21	9.11	0.13	0.19	-1.08	6.37	-1.56	11.32
ILMN_2357272	BCLAF1	BCL2-associated transcription factor 1 (BCLAF1), transcript variant 1, mRNA.	NM_014739.2	0.54	0.69	-0.7	1.79	-0.91	2.37	-1.08	4.61	-0.17	0.04	-1.24	3.39
ILMN_1695354	BMF	Bcl2 modifying factor (BMF), transcript variant 2, mRNA.	NM_033503.3	0.62	0.82	-0.58	1.09	0.91	2.74	-0.88	3.62	-1.79	8.91	-1.2	2.86
ILMN_2308338	BMF	Bcl2 modifying factor (BMF), transcript variant 4, mRNA.	NM_001003943.1	0.8	1.38	-0.46	0.69	1.02	4.35	-0.97	5.42	-1.99	13.35	-1.26	3.14
ILMN_1718961	BNIP3L	BCL2/adenovirus E1B 19kDa interacting protein 3-like (BNIP3L), mRNA.	NM_004331.2	1.52	4.26	0.19	0.14	-0.69	1.26	-1.08	4.44	-0.39	0.18	-1.33	3.12
ILMN_1775943	BRMS1L	breast cancer metastasis-suppressor 1-like (BRMS1L), mRNA.	NM_032352.3	0.61	1.09	-0.67	1.99	-0.94	5.42	-1.43	15.05	-0.49	0.95	-1.28	4.32
ILMN_1775743	BTG1	B-cell translocation gene 1, anti-proliferative (BTG1), mRNA.	NM_001731.1	0.52	1.55	-1.35	10.79	0.48	1.48	-0.98	8.32	-1.47	11.5	-1.87	12.55
ILMN_2202948	BUB1	BUB1 budding uninhibited by benzimidazoles 1 homolog (yeast) (BUB1), mRNA.	NM_004336.2	-0.23	0.22	-1.18	6.55	-0.95	4.89	-1.74	18.53	-0.79	2.65	-0.95	3.09
ILMN_1678652	C10orf61	chromosome 10 open reading frame 61 (C10orf61), transcript variant 1, mRNA.	NM_001013840.1	-0.5	1.04	-1.03	5.92	-0.54	2.14	-1.06	10.47	-0.51	1.34	-0.53	1.07
ILMN_1658494	C13orf15	chromosome 13 open reading frame 15 (C13orf15), mRNA.	NM_014059.2	-0.05	0.03	-1.07	6.3	1.13	7.79	-0.67	4.01	-1.8	15.91	-1.01	3.96
ILMN_1741331	C14orf108	chromosome 14 open reading frame 108 (C14orf108), mRNA.	NM_018229.2	0.52	0.89	-1.04	5.01	-0.47	1.45	-1.43	16.3	-0.96	5.29	-1.56	6.73
ILMN_1686835	C17orf41	PREDICTED: chromosome 17 open reading frame 41 (C17orf41), mRNA.	XM_001134002.1	-0.41	0.39	-1.12	4.09	-0.95	5.29	-1.41	14.25	-0.46	0.78	-0.71	1.04
ILMN_1655485	C1orf124	chromosome 1 open reading frame 124 (C1orf124), transcript variant 2, mRNA.	NM_001010984.1	0.4	0.66	-1.57	10.79	0.13	0.14	-0.93	8.38	-1.06	6.94	-1.97	11.07
ILMN_2371470	C1orf124	chromosome 1 open reading frame 124 (C1orf124), transcript variant 1, mRNA.	NM_032018.4	-0.06	0.05	-1.65	15.56	-0.19	0.27	-1.31	15.77	-1.12	8.21	-1.6	11.9
ILMN_1760556	C1orf63	chromosome 1 open reading frame 63 (C1orf63), transcript variant 1, mRNA.	NM_207035.1	0.34	0.27	-2.16	10.6	-0.95	3.09	-2.6	23.84	-1.65	7.8	-2.5	9.73
ILMN_1689836	C5AR1	complement component 5a receptor 1 (C5AR1), mRNA.	NM_001736.3	-1.02	4.08	-1	5.44	-0.74	2.67	-1.19	9.12	-0.45	0.58	0.02	0
ILMN_1776788	C5orf41	chromosome 5 open reading frame 41 (C5orf41), mRNA.	NM_153607.1	0.55	0.63	-0.73	1.69	-1.48	5.29	-1.7	9.22	-0.23	0.05	-1.28	3.17
ILMN_2195821	C5orf41	chromosome 5 open reading frame 41 (C5orf41), mRNA.	NM_153607.1	0.68	1.1	-0.8	2.32	-1.16	3.55	-1.84	11.23	-0.67	0.72	-1.48	4.69
ILMN_1672605	C7orf41	chromosome 7 open reading frame 41 (C7orf41), mRNA.	NM_152793.2	0.17	0.24	-1.52	14.03	-0.66	2.9	-1.84	23.37	-1.18	7.74	-1.7	12.61
ILMN_1741881	C9orf72	chromosome 9 open reading frame 72 (C9orf72), transcript variant 1, mRNA.	NM_018325.1	0.68	1.96	-0.86	4.44	-0.48	1.29	-1.39	13.85	-0.92	4.06	-1.54	7.87
ILMN_1715437	CASC5	cancer susceptibility candidate 5 (CASC5), transcript variant 2, mRNA.	NM_144508.3	-0.64	1.45	-1.42	8.43	-0.91	6.41	-1.39	17.29	-0.47	1.19	-0.78	2.04
ILMN_1770678	CBX2	chromobox homolog 2 (Pc class homolog, Drosophila) (CBX2), transcript variant 1, mRNA.	NM_005189.1	-0.74	3.09	-1.19	9.03	-0.52	2.26	-1.51	20.78	-0.99	6.9	-0.45	1
ILMN_1809889	CCDC117	coiled-coil domain containing 117 (CCDC117), mRNA.	NM_173510.1	0.47	0.58	-0.68	1.83	-1.48	7.72	-1.83	14.43	-0.34	0.19	-1.15	3.2
ILMN_1798659	CCDC28A	coiled-coil domain containing 28A (CCDC28A), mRNA.	NM_015439.2	-0.12	0.12	-1.4	12.02	-0.1	0.12	-1.54	22.65	-1.43	14.74	-1.29	8.07
ILMN_2101375	CCDC77	coiled-coil domain containing 77 (CCDC77), mRNA.	NM_032358.2	-0.56	1.18	-1.57	10.1	-0.57	2.22	-1.79	23.35	-1.22	8.79	-1.01	3.57
ILMN_1786125	CCNA2	cyclin A2 (CCNA2), mRNA.	NM_001237.2	0.02	0.01	-1.39	9.07	-0.82	3.86	-1.74	19.49	-0.92	4.07	-1.41	6.75
ILMN_1801939	CCNB2	cyclin B2 (CCNB2), mRNA.	NM_004701.2	-0.5	2	-1.38	13.4	-0.33	1.09	-1.31	20.06	-0.99	8.57	-0.87	5.23
ILMN_2384785	CCNE1	cyclin E1 (CCNE1), transcript variant 2, mRNA.	NM_057182.1	-0.79	2.3	-1.53	9.42	-0.37	0.86	-1.04	9.27	-0.67	2.26	-0.74	1.81
ILMN_2374425	CCNE1	cyclin E1 (CCNE1), transcript variant 1, mRNA.	NM_001238.1	-0.91	3.02	-1.86	12.13	-0.45	1.34	-1.36	14.98	-0.91	4.66	-0.95	3.03
ILMN_2228732	CCNG2	cyclin G2 (CCNG2), mRNA.	NM_004354.1	-0.13	0.1	-2.08	14.49	0.04	0.02	-1.46	14.81	-1.49	10.7	-1.96	10.48
ILMN_1810069	CCNYL1	cyclin Y-like 1 (CCNYL1), mRNA.	NM_152523.1	-0.65	1.36	-1.08	5.12	-0.99	5.52	-1.01	7.68	-0.02	0	-0.43	0.47
ILMN_2294431	CDC25C	cell division cycle 25 homolog C (S. pombe) (CDC25C), transcript variant 1, mRNA.	NM_001790.3	-0.41	0.57	-1.35	7.42	-0.84	3.8	-1.63	16.59	-0.79	2.62	-0.93	2.68
ILMN_1725260	CDC25C	cell division cycle 25 homolog C (S. pombe) (CDC25C), transcript variant 2, mRNA.	NM_022809.2	-0.46	1.04	-1.11	7.61	-0.7	3.55	-1.36	15.6	-0.65	2.36	-0.65	2
ILMN_1802951	CDCA1	cell division cycle associated 1 (CDCA1), transcript variant 1, mRNA.	NM_145697.1	-1.4	5.89	-1.82	11.07	-0.61	2.19	-1.22	11.14	-0.61	1.57	-0.42	0.45
ILMN_1709294	CDCA8	cell division cycle associated 8 (CDCA8), mRNA.	NM_018101.2	-0.72	3.68	-1.44	13.46	-0.82	3.9	-1.62	17.54	-0.8	3	-0.72	3.48
ILMN_1748883	CDKN2D	cyclin-dependent kinase inhibitor 2D (p19, inhibits CDK4) (CDKN2D), transcript variant 2, mRNA.	NM_079421.2	-1.43	8.55	-0.73	3.85	-1.22	10.3	-0.82	6.63	0.4	0.71	0.71	2.37
ILMN_1801257	CENPA	centromere protein A (CENPA), transcript variant 2, mRNA.	NM_001042426.1	-0.56	1.62	-2.45	19.69	-0.42	0.95	-1.81	20.41	-1.39	9.16	-1.89	11.95
ILMN_1716279	CENPE	centromere protein E, 312kDa (CENPE), mRNA.	NM_001813.2	-0.8	1.88	-1.43	7.33	-0.88	2.77	-1.25	7.45	-0.37	0.22	-0.63	1.02
ILMN_1664516	CENPF	centromere protein F, 350/400ka (mitosin) (CENPF), mRNA.	NM_016343.3	0.55	1.82	-0.62	3.33	0.16	0.22	-0.94	9.99	-1.1	8.85	-1.16	6.7
ILMN_1670769	CENPQ	centromere protein Q (CENPQ), mRNA.	NM_018132.3	0.24	0.16	-0.99	3.09	-0.79	1.81	-1.11	5.04	-0.32	0.13	-1.24	3.02
ILMN_1758778	CEP110	centrosomal protein 110kDa (CEP110), mRNA.	NM_007018.4	1.11	3.8	-0.9	3.7	0.15	0.11	-1.23	8.53	-1.38	6.86	-2	9.34
ILMN_2356838	CEPT1	choline/ethanolamine phosphotransferase 1 (CEPT1), transcript variant 1, mRNA.	NM_006090.3	1.38	2.53	0.29	0.21	-0.84	2.22	-1.09	5.18	-0.25	0.08	-1.08	1.42
ILMN_2224031	CETN3	centrin, EF-hand protein, 3 (CDC31 homolog, yeast) (CETN3), mRNA.	NM_004365.2	0.94	0.97	-0.77	1.01	-1.28	5.33	-1.78	12.9	-0.51	0.45	-1.71	3.03
ILMN_1664630	CHEK1	CHK1 checkpoint homolog (S. pombe) (CHEK1), mRNA.	NM_001274.3	-0.78	1.54	-1.05	3.94	-0.68	1.63	-1.16	6.6	-0.48	0.45	-0.27	0.11
ILMN_1679428	CHIC2	cysteine-rich hydrophobic domain 2 (CHIC2), mRNA.	NM_012110.2	0.25	0.27	-1	5.2	-0.25	0.7	-1.03	14.98	-0.78	6.04	-1.25	5.22
ILMN_1658504	CHKA	choline kinase alpha (CHKA), transcript variant 2, mRNA.	NM_212469.1	-1.1	8.83	-1.41	14.86	-0.8	8.05	-1.24	21.53	-0.44	1.9	-0.31	0.74
ILMN_1763265	CHMP1B	chromatin modifying protein 1B (CHMP1B), mRNA.	NM_020412.3	0.26	0.26	-1	4.79	0.48	2.56	-0.57	4.97	-1.05	10.15	-1.26	4.87
ILMN_1776337	CHORDC1	cysteine and histidine-rich domain (CHORD)-containing 1 (CHORDC1), mRNA.	NM_012124.1	-0.03	0.01	-1.45	9.36	-0.29	0.37	-1.13	7.73	-0.84	2.47	-1.42	6.66
ILMN_1674411	CKAP2	cytoskeleton associated protein 2 (CKAP2), transcript variant 2, mRNA.	NM_001098525.1	0.62	0.67	-1.35	4.54	-1.13	4.7	-2.26	20.55	-1.13	3.83	-1.97	5.88
ILMN_2181060	CKAP2	cytoskeleton associated protein 2 (CKAP2), mRNA.	NM_018204.2	-0.45	0.56	-1.82	10.05	0.5	0.92	-0.66	2.35	-1.16	4.3	-1.37	4.69
ILMN_1751776	CKAP2L	cytoskeleton associated protein 2-like (CKAP2L), mRNA.	NM_152515.2	-0.41	0.57	-1.65	10.15	-0.86	2.95	-1.47	11.01	-0.61	0.98	-1.25	4.77
ILMN_1671933	CLCC1	chloride channel CLIC-like 1 (CLCC1), transcript variant 2, mRNA.	NM_015127.3	-0.21	0.16	-1.25	6.17	-0.71	4.14	-1.61	22.54	-0.9	5.62	-1.04	3.05
ILMN_1746676	CLDN8	claudin 8 (CLDN8), mRNA.	NM_199328.1	2.16	10.69	0.39	0.73	2.11	20.52	0.29	0.68	-1.81	14.8	-1.77	7.74
ILMN_1709894	CLPX	ClpX caseinolytic peptidase X homolog (E. coli) (CLPX), mRNA.	NM_006660.3	0.19	0.21	-1.13	7.98	-0.67	3.56	-1.85	26.6	-1.18	9.15	-1.32	7.25
ILMN_2292123	COL4A3BP	collagen, type IV, alpha 3 (Goodpasture antigen) binding protein (COL4A3BP), transcript variant 1, mRNA.	NM_005713.1	-0.95	2.49	-1.07	4.38	-0.79	2.75	-1.1	7.17	-0.31	0.19	-0.12	0.03
ILMN_1790689	CRISPLD2	cysteine-rich secretory protein LCCL domain containing 2 (CRISPLD2), mRNA.	NM_031476.2	-1.05	7.44	-1.23	11.71	-0.75	4.7	-1.1	12.43	-0.35	0.56	-0.18	0.17
ILMN_1760593	CRY1	cryptochrome 1 (photolyase-like) (CRY1), mRNA.	NM_004075.2	-0.23	0.19	-1.21	5.87	-1.22	6.51	-1.44	11.55	-0.22	0.08	-0.98	2.72
ILMN_1652024	CSNK1G3	casein kinase 1, gamma 3 (CSNK1G3), transcript variant 2, mRNA.	NM_001031812.2	0.75	0.85	-0.59	0.82	-1.13	4.18	-1.22	6.64	-0.09	0.02	-1.34	2.57
ILMN_2397880	CSTF3	cleavage stimulation factor, 3' pre-RNA, subunit 3, 77kDa (CSTF3), transcript variant 2, mRNA.	NM_001033505.1	-0.25	0.19	-1.57	7.36	-0.59	1	-1.55	9.45	-0.96	2.13	-1.31	3.81
ILMN_1806951	CSTF3	cleavage stimulation factor, 3' pre-RNA, subunit 3, 77kDa (CSTF3), transcript variant 3, mRNA.	NM_001033506.1	-0.67	0.47	-1.87	5.04	-0.45	0.44	-1.06	3.74	-0.62	0.49	-1.21	1.4
ILMN_1762002	CSTF3	cleavage stimulation factor, 3' pre-RNA, subunit 3, 77kDa (CSTF3), transcript variant 2, mRNA.	NM_001033505.1	-0.25	0.22	-1.4	7.52	-0.57	0.74	-1.32	5.67	-0.75	0.83	-1.15	3.75
ILMN_1665655	CTDSPL2	CTD (carboxy-terminal domain, RNA polymerase II, polypeptide A) small phosphatase like 2 (CTDSPL2), mRNA.	NM_016396.1	0.34	0.26	-1.41	5.39	-1.06	3.49	-1.63	10.55	-0.57	0.58	-1.75	5.34
ILMN_1783285	CTPS	CTP synthase (CTPS), mRNA.	NM_001905.1	-0.56	2.03	-1.22	10.33	-1.01	4.86	-1.59	14.45	-0.58	1.04	-0.67	2.68
ILMN_1787251	DAAM1	dishevelled associated activator of morphogenesis 1 (DAAM1), mRNA.	NM_014992.1	2.58	7.49	-0.34	0.26	0.36	0.39	-1	4.45	-1.36	4.96	-2.92	8.47
ILMN_2046470	DAAM1	dishevelled associated activator of morphogenesis 1 (DAAM1), mRNA.	NM_014992.1	1.09	1.94	-1.15	3.11	1.76	10.32	0.57	1.61	-1.19	4.13	-2.24	6.68
ILMN_1810719	DCUN1D1	DCN1, defective in cullin neddylation 1, domain containing 1 (S. cerevisiae) (DCUN1D1), mRNA.	NM_020640.2	0.83	1.04	-0.49	0.58	-1.53	4.65	-1.22	4.16	0.31	0.08	-1.32	2.49
ILMN_1794392	DDX3X	DEAD (Asp-Glu-Ala-Asp) box polypeptide 3, X-linked (DDX3X), mRNA.	NM_001356.3	1.5	3.7	-0.47	0.57	-0.58	0.83	-1.14	4.67	-0.55	0.42	-1.96	5.57
ILMN_1802819	DEPDC1	DEP domain containing 1 (DEPDC1), mRNA.	NM_017779.3	0.15	0.07	-1.01	2.64	-1.47	7.51	-1.74	13.25	-0.27	0.11	-1.15	2.16
ILMN_1749829	DLG7	discs, large homolog 7 (Drosophila) (DLG7), mRNA.	NM_014750.3	0.64	0.99	-0.65	1.58	-0.27	0.32	-1.06	7.18	-0.8	2.3	-1.28	3.72
ILMN_1672094	DLX1	distal-less homeobox 1 (DLX1), transcript variant 1, mRNA.	NM_178120.4	0.95	4.74	-0.61	2.99	0.3	0.61	-0.79	6.02	-1.09	7.13	-1.56	9.64
ILMN_1798210	E2F7	E2F transcription factor 7 (E2F7), mRNA.	NM_203394.2	0.4	0.33	-1.4	5.34	-1.2	5.37	-1.84	15.18	-0.64	1.02	-1.8	5.59
ILMN_1765159	ELMOD2	ELMO/CED-12 domain containing 2 (ELMOD2), mRNA.	NM_153702.1	-0.17	0.16	-1.46	10.64	-0.55	2.43	-1.19	13.83	-0.64	2.56	-1.3	6.62
ILMN_1672022	EPHA4	EPH receptor A4 (EPHA4), mRNA.	NM_004438.3	1.5	10.69	-0.53	2.75	1.42	8.07	-0.03	0.02	-1.45	7.28	-2.04	14.89
ILMN_2334204	ERCC6L	excision repair cross-complementing rodent repair deficiency, complementation group 6-like (ERCC6L), mRNA.	NM_017669.2	-0.71	1.14	-1.33	5.49	-0.79	1.8	-1.4	7.62	-0.61	0.63	-0.62	0.77
ILMN_1673721	EXO1	exonuclease 1 (EXO1), transcript variant 1, mRNA.	NM_006027.3	-0.33	0.53	-1.46	10.85	-0.32	0.55	-1.56	16.53	-1.24	7.54	-1.13	5.47
ILMN_1708936	EXOSC3	exosome component 3 (EXOSC3), transcript variant 1, mRNA.	NM_016042.2	0.06	0.05	-1.58	13.44	0.74	3.05	-0.27	0.58	-1.02	4.76	-1.65	11.01
ILMN_1775498	FAM100B	family with sequence similarity 100, member B (FAM100B), mRNA.	NM_182565.2	-0.68	1.73	-1.71	11.01	-0.5	1.37	-1.48	15.08	-0.99	4.68	-1.03	3.56
ILMN_1758672	FAM107B	family with sequence similarity 107, member B (FAM107B), mRNA.	NM_031453.2	-1.58	3.69	-2.31	9.11	-1.35	9.38	-1.46	13.86	-0.1	0.03	-0.73	0.69
ILMN_2387952	FAM134B	family with sequence similarity 134, member B (FAM134B), transcript variant 1, mRNA.	NM_001034850.1	0.54	1.5	-0.88	5.34	0.61	2.39	-0.91	7.27	-1.51	12.26	-1.42	8
ILMN_1706015	FAM43A	family with sequence similarity 43, member A (FAM43A), mRNA.	NM_153690.4	-0.83	1.73	-1.53	7.28	-0.46	1.23	-1.57	16.8	-1.1	6.04	-0.7	1.12
ILMN_1669555	FAM48A	family with sequence similarity 48, member A (FAM48A), transcript variant 1, mRNA.	NM_001014286.2	-0.43	1.08	-1.08	8.23	-0.26	0.25	-1.12	6.44	-0.86	2.15	-0.65	2.37
ILMN_1754045	FANCL	Fanconi anemia, complementation group L (FANCL), mRNA.	NM_018062.2	-0.24	0.31	-1.41	10.32	-0.83	3.92	-1.68	18.22	-0.85	3.33	-1.17	5.69
ILMN_1750160	FASTKD3	FAST kinase domains 3 (FASTKD3), mRNA.	NM_024091.2	-0.13	0.08	-1.38	7.48	-1.02	4.33	-1.44	11.06	-0.42	0.39	-1.25	4.49
ILMN_1754489	FBXL20	F-box and leucine-rich repeat protein 20 (FBXL20), mRNA.	NM_032875.1	-0.68	4.08	-1.61	17.1	-0.84	7.96	-1.93	36.39	-1.09	11.44	-0.93	6.44
ILMN_1652280	FBXO32	F-box protein 32 (FBXO32), transcript variant 1, mRNA.	NM_058229.2	0.59	1.33	-1.14	6.49	1.03	2.96	-0.95	3.51	-1.99	9.12	-1.73	8.69
ILMN_1703955	FBXO32	F-box protein 32 (FBXO32), transcript variant 2, mRNA.	NM_148177.1	0.95	2.62	-1.83	10.35	0.76	1.18	-2.26	13.19	-3.03	15.12	-2.78	13.5
ILMN_1710676	FBXO5	F-box protein 5 (FBXO5), mRNA.	NM_012177.2	-0.54	0.86	-1.26	6.29	-0.93	5.81	-1.25	13.08	-0.32	0.35	-0.73	1.48
ILMN_1672843	FBXO8	F-box protein 8 (FBXO8), mRNA.	NM_012180.2	-0.17	0.15	-1.59	10.59	0.2	0.32	-0.88	8.67	-1.08	8.33	-1.42	6.64
ILMN_2389114	FIGNL1	fidgetin-like 1 (FIGNL1), transcript variant 1, mRNA.	NM_001042762.1	0.52	0.3	-0.97	1.51	-1.04	2.25	-1.62	7.33	-0.58	0.35	-1.49	2.18
ILMN_1778152	FIGNL1	fidgetin-like 1 (FIGNL1), transcript variant 1, mRNA.	NM_001042762.1	0.37	0.27	-0.84	2	-0.95	2.37	-1.3	6.09	-0.35	0.14	-1.21	2.54
ILMN_1704418	FOXD1	forkhead box D1 (FOXD1), mRNA.	NM_004472.2	-0.08	0.04	-1.79	8.6	-0.29	0.64	-1.06	11.81	-0.77	4.13	-1.71	5.77
ILMN_1781416	FRAT1	frequently rearranged in advanced T-cell lymphomas (FRAT1), mRNA.	NM_005479.2	-0.04	0.02	-1.17	6.98	0.08	0.06	-1.01	8.17	-1.09	6.06	-1.13	4.61
ILMN_1788213	FRAT2	frequently rearranged in advanced T-cell lymphomas 2 (FRAT2), mRNA.	NM_012083.2	0.01	0.01	-2.75	24.26	-0.2	0.46	-2.74	54.34	-2.54	40.77	-2.76	20.42
ILMN_1679640	FXR1	fragile X mental retardation, autosomal homolog 1 (FXR1), transcript variant 1, mRNA.	NM_005087.2	0.59	1.85	-0.66	3.42	-0.18	0.21	-1.02	8.86	-0.84	3.76	-1.25	6.83
ILMN_1743367	FZD4	frizzled homolog 4 (Drosophila) (FZD4), mRNA.	NM_012193.2	-0.99	4.96	-1.71	13.72	-0.91	5.44	-1.46	16.53	-0.55	1.43	-0.71	2.53
ILMN_2151281	GABARAPL1	GABA(A) receptor-associated protein like 1 (GABARAPL1), mRNA.	NM_031412.2	1.01	3.04	-1.47	7.87	-0.1	0.05	-1.3	6.81	-1.2	3.49	-2.48	11.98
ILMN_1750029	GABPA	GA binding protein transcription factor, alpha subunit 60kDa (GABPA), mRNA.	NM_002040.2	0.68	0.82	-0.45	0.56	-1.42	5.08	-1.72	9.73	-0.3	0.09	-1.12	2.12
ILMN_1772910	GAS1	growth arrest-specific 1 (GAS1), mRNA.	NM_002048.1	-0.14	0.22	-1.17	12.57	-0.41	1.01	-1.34	13.75	-0.93	4.53	-1.04	8.07
ILMN_2211003	GAS2L3	growth arrest-specific 2 like 3 (GAS2L3), mRNA.	NM_174942.1	-1.46	4.16	-1.48	5.81	-1.26	6.25	-1.54	11.94	-0.28	0.14	-0.02	0
ILMN_1800602	GCA	grancalcin, EF-hand calcium binding protein (GCA), mRNA.	NM_012198.2	-0.9	3.66	-1.12	7.17	-0.91	8.08	-1.06	13.8	-0.15	0.1	-0.22	0.14
ILMN_1730575	GCLC	glutamate-cysteine ligase, catalytic subunit (GCLC), mRNA.	NM_001498.2	0.29	0.44	-0.86	5.39	0.55	1.63	-0.59	2.68	-1.15	6.03	-1.15	5.98
ILMN_2093674	GMFB	glia maturation factor, beta (GMFB), mRNA.	NM_004124.2	0.11	0.08	-0.89	4.57	-0.65	1.75	-1.16	7.55	-0.51	0.64	-1	3.76
ILMN_2186216	GOLPH4	golgi phosphoprotein 4 (GOLPH4), mRNA.	NM_014498.2	-0.05	0.02	-1.05	3.77	-1.54	9.37	-1.52	11.96	0.02	0	-1	2.2
ILMN_2139816	GPSM2	G-protein signalling modulator 2 (AGS3-like, C. elegans) (GPSM2), mRNA.	NM_013296.3	-0.45	0.56	-1.3	6.08	-0.71	2.25	-1.51	12.86	-0.81	2.28	-0.85	1.84
ILMN_1685415	HBP1	HMG-box transcription factor 1 (HBP1), mRNA.	NM_012257.3	0.65	1.84	-1.45	9.91	0.19	0.16	-2	19.21	-2.19	15.97	-2.09	12.19
ILMN_2160764	HBP1	HMG-box transcription factor 1 (HBP1), mRNA.	NM_012257.3	0.4	0.94	-1.48	12.31	0.48	1.31	-1.68	18.59	-2.16	20.14	-1.88	12.92
ILMN_1783610	HELLS	helicase, lymphoid-specific (HELLS), mRNA.	NM_018063.3	0.57	1.28	-0.47	1.34	-0.83	3.26	-1.39	11.51	-0.56	0.96	-1.05	3.9
ILMN_1703906	HJURP	Holliday junction recognition protein (HJURP), mRNA.	NM_018410.3	-0.78	2.58	-1.86	13.17	-0.42	1.09	-1.79	22.08	-1.37	10.07	-1.08	4.37
ILMN_2219712	HMGB2	high-mobility group box 2 (HMGB2), mRNA.	NM_002129.2	-0.88	2.29	-2.06	12.05	0.4	0.72	-0.7	3.32	-1.1	4.86	-1.18	3.71
ILMN_1654268	HMGB2	high-mobility group box 2 (HMGB2), mRNA.	NM_002129.2	-0.41	0.65	-1.53	10.08	-0.7	3.45	-1.81	23.84	-1.11	7.32	-1.12	4.51
ILMN_2409220	HMMR	hyaluronan-mediated motility receptor (RHAMM) (HMMR), transcript variant 1, mRNA.	NM_012484.1	-0.5	0.72	-1.49	7.87	0.17	0.18	-0.83	5.32	-1.01	4.71	-0.99	2.68
ILMN_1781942	HMMR	hyaluronan-mediated motility receptor (RHAMM) (HMMR), transcript variant 2, mRNA.	NM_012485.1	0.23	0.27	-1.13	7.22	-0.93	3.81	-1.83	16.89	-0.89	2.76	-1.36	6.87
ILMN_1865735		AGENCOURT_14360862 NIH_MGC_187 cDNA clone IMAGE:30405414 5, mRNA sequence		0.33	0.33	-0.8	2.75	-0.41	0.38	-1.2	4.79	-0.79	0.98	-1.14	3.4
ILMN_1902308		AGENCOURT_13567612 NIH_MGC_184 cDNA clone IMAGE:30326575 5, mRNA sequence		0.74	0.39	-1.6	2.69	0.35	0.44	-0.94	4.6	-1.29	5.27	-2.35	3.55
ILMN_1904135		cDNA FLJ13474 fis, clone PLACE1003593		0.6	0.64	-0.77	1.64	-1.17	5.26	-1.22	7.65	-0.05	0.01	-1.37	3.13
ILMN_1869897		cDNA clone IMAGE:5297467		1.54	2.17	-0.51	0.38	-1.15	3.47	-1.41	7.01	-0.26	0.07	-2.05	3.49
ILMN_1860288		cDNA FLJ32174 fis, clone PLACE6001064		0.12	0.08	-1.03	5.16	-0.79	4.13	-1.14	11.04	-0.35	0.45	-1.14	4.23
ILMN_1886493		cDNA: FLJ22720 fis, clone HSI14320		-0.23	0.12	-1.53	5.63	-0.68	1.99	-1.15	7.65	-0.47	0.54	-1.3	2.84
ILMN_1838313		cDNA clone IMAGE:5260685		-0.22	0.19	-1.66	10.13	-1.04	6.87	-1.61	18.75	-0.57	1.48	-1.45	6.04
ILMN_1819384		AGENCOURT_14535501 NIH_MGC_191 cDNA clone IMAGE:30415823 5, mRNA sequence		-0.49	0.34	-1.48	4.22	-1.13	2.89	-1.77	9.2	-0.64	0.51	-0.99	1.22
ILMN_1881526		od80c09.s1 NCI_CGAP_Ov2 cDNA clone IMAGE:1374256, mRNA sequence		-0.53	0.38	-1.44	3.89	-0.77	1.68	-1.43	7.88	-0.66	0.77	-0.91	0.96
ILMN_1904521		zx74f04.s1 Soares ovary tumor NbHOT cDNA clone IMAGE:809503 3 similar to contains element LTR7 repetitive element ;, mRNA sequence		-2.04	5.75	-2.72	11.26	-0.42	0.31	-1.85	8.44	-1.43	3.07	-0.68	0.57
ILMN_1829845		AV737317 CB cDNA clone CBCAQH03 5, mRNA sequence		-0.13	0.03	-3.1	6.34	-0.74	2.69	-2.22	24.82	-1.49	9.12	-2.97	4.05
ILMN_1840401		UI-H-EU1-bac-k-02-0-UI.s1 NCI_CGAP_Ct1 cDNA clone UI-H-EU1-bac-k-02-0-UI 3, mRNA sequence		-0.93	1.66	-1.07	3.19	-0.99	3.66	-1.22	7.45	-0.23	0.08	-0.14	0.03
ILMN_2086095	ID2	inhibitor of DNA binding 2, dominant negative helix-loop-helix protein (ID2), mRNA.	NM_002166.4	-0.34	0.29	-1.62	7.71	1.48	8.74	-0.42	1	-1.89	12.15	-1.28	3.64
ILMN_1739428	IFIT2	interferon-induced protein with tetratricopeptide repeats 2 (IFIT2), mRNA.	NM_001547.4	-0.2	0.13	-1.77	8.72	-0.59	1.72	-2.11	23.33	-1.52	9.66	-1.58	5.2
ILMN_1765668	IL20RB	interleukin 20 receptor beta (IL20RB), mRNA.	NM_144717.2	0.8	3.02	-0.46	1.53	0.66	2.45	-0.54	2.36	-1.2	6.92	-1.26	6.3
ILMN_1798181	IRF7	interferon regulatory factor 7 (IRF7), transcript variant b, mRNA.	NM_004029.2	-0.9	5.55	-1.35	12.66	-0.77	3.5	-1.26	11.64	-0.48	0.87	-0.45	1.41
ILMN_2083469	IRS2	insulin receptor substrate 2 (IRS2), mRNA.	NM_003749.2	-0.07	0.04	-1.2	5.04	-0.31	0.4	-1.3	9.62	-0.99	3.49	-1.12	3
ILMN_1747241	IWS1	IWS1 homolog (S. cerevisiae) (IWS1), mRNA.	NM_017969.1	-0.01	0.01	-1.41	12.51	-0.22	0.3	-1.29	13.37	-1.07	6.35	-1.41	9.52
ILMN_1793371	KIAA0430	KIAA0430 (KIAA0430), mRNA.	NM_014647.2	0.57	1.55	-0.45	1.48	-0.49	1.55	-1.38	14.95	-0.89	4.28	-1.02	4.45
ILMN_1651684	KIAA0586	KIAA0586 (KIAA0586), mRNA.	NM_014749.2	-0.68	1.89	-1.24	7.71	-0.09	0.1	-1.06	12.8	-0.97	7.26	-0.57	1.2
ILMN_1745813	KIAA1279	KIAA1279 (KIAA1279), mRNA.	NM_015634.2	0.43	0.89	-0.78	4.22	-0.87	5.7	-1.23	13.91	-0.36	0.55	-1.21	6.07
ILMN_1700733	KIAA1370	KIAA1370 (KIAA1370), mRNA.	NM_019600.2	0.72	1.33	-0.75	2.16	-0.91	2.71	-1.72	12.22	-0.82	1.59	-1.47	4.87
ILMN_2143155	KIF11	kinesin family member 11 (KIF11), mRNA.	NM_004523.2	-0.35	0.64	-1.49	11.59	0.01	0	-1.2	10.83	-1.21	7.27	-1.14	5.8
ILMN_1794539	KIF11	kinesin family member 11 (KIF11), mRNA.	NM_004523.2	0.01	0	-1	5.96	-0.46	1.58	-1.72	23.84	-1.27	10.31	-1.01	4.14
ILMN_1808071	KIF14	kinesin family member 14 (KIF14), mRNA.	NM_014875.1	-0.61	0.79	-1.43	5.93	-0.64	2.28	-1.31	12.11	-0.67	1.91	-0.83	1.37
ILMN_1695658	KIF20A	kinesin family member 20A (KIF20A), mRNA.	NM_005733.1	-0.9	4.65	-1.64	13.96	-0.91	4.52	-2.02	23.21	-1.11	5.64	-0.74	3
ILMN_1734476	KIF2A	kinesin heavy chain member 2A (KIF2A), mRNA.	NM_004520.1	0.84	1.56	-0.26	0.26	-0.1	0.07	-1	6.43	-0.9	3.06	-1.1	2.47
ILMN_1685916	KIF2C	kinesin family member 2C (KIF2C), mRNA.	NM_006845.2	-0.95	3.31	-1.27	7.44	-0.66	3.41	-1.34	16.23	-0.68	2.79	-0.33	0.29
ILMN_1788160	KIF5B	kinesin family member 5B (KIF5B), mRNA.	NM_004521.1	0.03	0.01	-1.02	4.5	-1.15	6.85	-0.99	7.01	0.16	0.06	-1.04	3.13
ILMN_1751656	KLF11	PREDICTED: Kruppel-like factor 11 (KLF11), mRNA.	XM_001129527.1	0.26	0.36	-0.78	4.47	0.31	0.51	-0.75	4.31	-1.07	5.22	-1.04	4.97
ILMN_2164081	KLHL12	kelch-like 12 (Drosophila) (KLHL12), mRNA.	NM_021633.2	0.16	0.13	-0.94	4.48	-0.68	4.06	-1.14	13.82	-0.46	1.27	-1.1	3.97
ILMN_1678671	KLHL24	kelch-like 24 (Drosophila) (KLHL24), mRNA.	NM_017644.3	-0.3	0.31	-2.15	13.8	-0.43	0.42	-2.56	17.8	-2.13	9.01	-1.85	8.76
ILMN_1664466	KLHL9	kelch-like 9 (Drosophila) (KLHL9), mRNA.	NM_018847.2	0.63	1.54	-1.12	6.29	0.74	3.65	-0.34	1.06	-1.08	6.54	-1.75	8.83
ILMN_2126706	LMNB1	lamin B1 (LMNB1), mRNA.	NM_005573.2	-0.39	0.7	-1.19	7.72	-0.65	1.56	-1.38	9.34	-0.73	1.41	-0.79	2.63
ILMN_1703487	LMO4	LIM domain only 4 (LMO4), mRNA.	NM_006769.2	0.17	0.18	-1.21	8.83	-0.41	1.2	-1.15	12.12	-0.74	3.22	-1.38	7.82
ILMN_1710954	LOC283932	hypothetical protein LOC283932 (LOC283932), mRNA.	NM_175901.3	-0.33	0.19	-1.86	6.36	-0.39	0.56	-1.54	11.96	-1.16	4.44	-1.53	3.07
ILMN_1714741	LOC346887	PREDICTED: similar to solute carrier family 16 (monocarboxylic acid transporters), member 14 (LOC346887), mRNA.	XM_943533.1	-0.75	3.16	-1.18	8.95	-0.82	7.1	-1.18	17.42	-0.37	0.93	-0.43	0.92
ILMN_1664955	LOC642109	PREDICTED: similar to FRG1 protein (FSHD region gene 1 protein) (LOC642109), mRNA.	XM_936248.1	-0.68	1.08	-1.31	5.48	-0.97	6.02	-1.11	10.34	-0.14	0.06	-0.63	0.83
ILMN_1712347	LOC644422	PREDICTED: misc_RNA (LOC644422), miscRNA.	XR_019449.1	-1.1	2.06	-2.12	8.75	-0.82	2.57	-1.54	11.48	-0.72	1.4	-1.02	1.62
ILMN_1753692	LOC647135	PREDICTED: similar to SLIT-ROBO Rho GTPase-activating protein 2 (srGAP2) (Formin-binding protein 2), transcript variant 1 (LOC647135), mRNA.	XM_930578.2	-0.91	2.63	-1.38	7.43	-0.62	1.61	-1.2	8.2	-0.58	0.93	-0.47	0.58
ILMN_1704284	LOC648164	PREDICTED: similar to germinal histone H4 gene, transcript variant 1 (LOC648164), mRNA.	XM_936503.1	-0.51	0.5	-1.25	4.23	-0.12	0.07	-1.27	6.56	-1.15	3.19	-0.74	0.92
ILMN_1755910	LOC648366	PREDICTED: similar to SLIT-ROBO Rho GTPase-activating protein 2 (srGAP2) (Formin-binding protein 2) (LOC648366), mRNA.	XM_497707.2	-1.15	4.96	-1.55	10.24	-0.81	3.11	-1.33	10.72	-0.52	0.8	-0.4	0.52
ILMN_1805300	LOC650132	PREDICTED: similar to chromosome 1 open reading frame 80 (LOC650132), mRNA.	XM_939218.1	-0.71	1.23	-1.19	4.75	-0.92	4	-1.16	8.42	-0.24	0.11	-0.48	0.43
ILMN_1742431	LOC651309	PREDICTED: hypothetical protein LOC651309 (LOC651309), mRNA.	XM_942586.1	0.12	0.09	-1.14	6.86	0.24	0.22	-1.13	6.67	-1.36	6.11	-1.26	5.68
ILMN_1665332	LOC653157	PREDICTED: similar to Iduronate 2-sulfatase precursor (Alpha-L-iduronate sulfate sulfatase) (Idursulfase) (LOC653157), mRNA.	XM_926258.1	-1.07	3.88	-1.48	8.73	-0.89	2.54	-1.15	5.83	-0.26	0.09	-0.41	0.46
ILMN_1659490	LOC653158	PREDICTED: similar to hypothetical protein MGC40405, transcript variant 1 (LOC653158), mRNA.	XM_926814.1	-0.92	1.23	-1.25	3.32	-0.55	1.3	-1.18	8.19	-0.63	1.2	-0.33	0.1
ILMN_1701882	LOC653820	PREDICTED: similar to family with sequence similarity 72, member A, transcript variant 1 (LOC653820), mRNA.	XM_930579.2	-0.24	0.11	-1.3	3.19	-0.91	2.88	-1.47	9.86	-0.57	0.68	-1.06	1.32
ILMN_1729832	LOC653994	PREDICTED: similar to eukaryotic translation initiation factor 4H isoform 2, transcript variant 5 (LOC653994), mRNA.	XM_944439.2	-1.16	3.24	-1.41	6.26	-1.25	7.46	-0.87	5.14	0.38	0.35	-0.25	0.1
ILMN_1749875	LOC728715	PREDICTED: similar to hCG38149 (LOC728715), mRNA.	XM_001128260.1	-0.8	3.39	-1.1	7.77	-1.58	16.72	-2.07	30.53	-0.49	1.29	-0.3	0.35
ILMN_1807136	LOC729559	PREDICTED: similar to ciliary rootlet coiled-coil, rootletin (LOC729559), mRNA.	XM_001130627.1	-0.29	0.4	-1.03	6.47	-0.53	2.1	-1.28	15.06	-0.76	3.58	-0.74	2.41
ILMN_1754332	LOC85389	RNA, small nucleolar (LOC85389) on chromosome 11.	NR_001453.1	-1.03	3.44	-1.46	8.26	-1.04	3.65	-1.48	9.66	-0.45	0.34	-0.43	0.48
ILMN_1689294	LOC85390	RNA, small nucleolar (LOC85390) on chromosome 11.	NR_001454.1	-1.15	3.62	-1.49	7.54	-0.94	3.56	-1.38	9.89	-0.44	0.41	-0.34	0.22
ILMN_1654518	LRCH4	leucine-rich repeats and calponin homology (CH) domain containing 4 (LRCH4), mRNA.	NM_002319.2	-1.06	4.5	-1	5.61	-1.25	10.4	-1.43	16.72	-0.18	0.09	0.06	0.01
ILMN_1719543	MAF	v-maf musculoaponeurotic fibrosarcoma oncogene homolog (avian) (MAF), transcript variant 1, mRNA.	NM_005360.3	1.49	7.84	-0.38	0.92	0.56	1.02	-0.46	1.01	-1.02	2.82	-1.88	10.21
ILMN_1734702	MANEA	mannosidase, endo-alpha (MANEA), mRNA.	NM_024641.2	-0.71	0.66	-1.33	3.42	-1.21	8.09	-1.06	8.52	0.14	0.05	-0.62	0.4
ILMN_1655796	2003-03-01	PREDICTED: membrane-associated ring finger (C3HC4) 3 (MARCH3), mRNA.	XM_001127871.1	0.09	0.09	-1.25	11.77	-1.34	12.2	-1.25	14.11	0.08	0.03	-1.34	9.8
ILMN_1737298	MAT2A	methionine adenosyltransferase II, alpha (MAT2A), mRNA.	NM_005911.4	-0.67	1	-1.03	3.47	-0.53	1.25	-1.08	7.19	-0.55	0.87	-0.36	0.2
ILMN_2413898	MCM10	minichromosome maintenance complex component 10 (MCM10), transcript variant 2, mRNA.	NM_018518.3	-0.85	3.4	-1.23	8.46	-0.84	2.62	-1.31	8.44	-0.47	0.44	-0.38	0.57
ILMN_1777526	MED20	mediator complex subunit 20 (MED20), mRNA.	NM_004275.3	0.32	0.6	-1.16	8.85	-0.26	0.6	-1.07	13.44	-0.81	5.29	-1.49	9.27
ILMN_1674506	MED23	mediator complex subunit 23 (MED23), transcript variant 2, mRNA.	NM_015979.2	-0.53	1	-1	4.9	-0.95	3.97	-1.25	9.08	-0.31	0.19	-0.47	0.65
ILMN_1695945	MEIS2	Meis homeobox 2 (MEIS2), transcript variant g, mRNA.	NM_172315.1	1.34	6.73	-0.42	1.17	-0.15	0.16	-1.12	10.47	-0.97	5.15	-1.76	9.52
ILMN_2180827	MEPCE	methylphosphate capping enzyme (MEPCE), mRNA.	NM_019606.4	-0.77	4.63	-1.05	9.86	-0.73	5.04	-1.32	18.57	-0.59	2.55	-0.28	0.53
ILMN_1708782	MFAP3	microfibrillar-associated protein 3 (MFAP3), mRNA.	NM_005927.3	-0.25	0.29	-1.16	6.99	-1.15	11.03	-1.02	11.68	0.13	0.06	-0.91	3.13
ILMN_1756071	MFGE8	milk fat globule-EGF factor 8 protein (MFGE8), mRNA.	NM_005928.1	-0.64	1.41	-1.04	5.13	-0.75	4.18	-1.07	10.8	-0.32	0.39	-0.4	0.44
ILMN_1678300	MGC40489	PREDICTED: hypothetical protein MGC40489 (MGC40489), misc RNA.	XR_016048.1	-0.82	4.14	-1.13	9.18	-0.61	2.47	-1.01	8.97	-0.4	0.64	-0.31	0.5
ILMN_1686750	MGEA5	meningioma expressed antigen 5 (hyaluronidase) (MGEA5), mRNA.	NM_012215.2	0.65	1.64	-0.44	1.16	-0.4	1.06	-1.05	10	-0.65	2.31	-1.09	4.18
ILMN_1708006	MICB	MHC class I polypeptide-related sequence B (MICB), mRNA.	NM_005931.2	-1.49	12.02	-0.53	3.25	-1.05	9.72	-0.81	8	0.24	0.26	0.96	6.11
ILMN_1682232	MIER1	mesoderm induction early response 1 homolog (Xenopus laevis) (MIER1), transcript variant 1, mRNA.	NM_020948.2	0.3	0.4	-0.89	4.83	-0.42	1.13	-1.08	9.93	-0.66	2.17	-1.19	5.41
ILMN_1792910	MNT	MAX binding protein (MNT), mRNA.	NM_020310.2	-0.21	0.35	-1.09	10.2	-0.04	0.03	-1.43	18.85	-1.39	12.83	-0.89	5.43
ILMN_1766094	MOSPD2	motile sperm domain containing 2 (MOSPD2), mRNA.	NM_152581.2	-0.26	0.2	-1.04	3.84	-0.73	2.76	-1.34	11.75	-0.61	1.36	-0.78	1.39
ILMN_1712452	MPHOSPH1	M-phase phosphoprotein 1 (MPHOSPH1), mRNA.	NM_016195.2	-0.12	0.1	-1.2	8.47	-0.2	0.35	-1.27	17.56	-1.07	9.13	-1.08	5.16
ILMN_1769299	MTMR11	myotubularin related protein 11 (MTMR11), mRNA.	NM_181873.2	1.27	8.33	0.04	0.04	0.36	0.92	-0.66	4.58	-1.02	6.61	-1.22	7.5
ILMN_2308849	MYADM	myeloid-associated differentiation marker (MYADM), transcript variant 4, mRNA.	NM_001020820.1	0.5	1.09	-0.57	2.12	-0.77	5.28	-1.02	11.68	-0.25	0.26	-1.07	4.46
ILMN_2399300	NAV2	neuron navigator 2 (NAV2), transcript variant 2, mRNA.	NM_145117.3	1.26	3.37	-2.06	9.89	-0.46	1.03	-1.33	11.38	-0.87	3.07	-3.33	13.89
ILMN_1664511	NDC80	NDC80 homolog, kinetochore complex component (S. cerevisiae) (NDC80), mRNA.	NM_006101.1	0.18	0.14	-1.03	4.79	-0.36	0.68	-1.42	13.59	-1.06	5.19	-1.21	4.33
ILMN_1726359	NECAP1	NECAP endocytosis associated 1 (NECAP1), mRNA.	NM_015509.2	-0.1	0.11	-1.08	8.96	-0.86	8.24	-1.35	22.22	-0.49	2.09	-0.97	5.53
ILMN_2261076	NEDD9	neural precursor cell expressed, developmentally down-regulated 9 (NEDD9), transcript variant 1, mRNA.	NM_006403.2	0.78	1.08	-0.57	0.87	1.15	6.52	0.12	0.14	-1.03	4.42	-1.35	2.99
ILMN_1653822	NEK2	NIMA (never in mitosis gene a)-related kinase 2 (NEK2), mRNA.	NM_002497.2	-0.77	3.48	-1.16	9.06	-0.63	2.24	-1.03	8.09	-0.41	0.53	-0.39	0.77
ILMN_1664216	NKIRAS1	NFKB inhibitor interacting Ras-like 1 (NKIRAS1), mRNA.	NM_020345.3	-0.08	0.06	-1.16	8.64	-0.35	0.99	-1.11	12.86	-0.76	4.01	-1.09	5.59
ILMN_2187727	NOC3L	nucleolar complex associated 3 homolog (S. cerevisiae) (NOC3L), mRNA.	NM_022451.9	-0.11	0.09	-1.27	9.33	-0.13	0.12	-1.14	9.62	-1	4.83	-1.16	5.92
ILMN_1689747	NOL8	nucleolar protein 8 (NOL8), mRNA.	NM_017948.4	-0.46	1	-1.07	6.93	-0.63	3.3	-1.17	13.78	-0.54	1.76	-0.61	1.66
ILMN_1684210	NPAL3	NIPA-like domain containing 3 (NPAL3), mRNA.	NM_020448.3	-0.15	0.14	-1.19	8.31	-0.27	0.48	-1.35	15.4	-1.08	7.05	-1.04	4.8
ILMN_1782305	NR4A2	nuclear receptor subfamily 4, group A, member 2 (NR4A2), transcript variant 1, mRNA.	NM_006186.2	-0.51	0.8	-2.1	12.72	-0.7	2.79	-1.56	16.23	-0.86	3.41	-1.59	6.5
ILMN_1756049	NT5DC3	5'-nucleotidase domain containing 3 (NT5DC3), transcript variant 2, mRNA.	NM_016575.1	-0.59	2.51	-1.31	11.97	-0.91	5.05	-1.43	14.98	-0.52	1.11	-0.72	3.41
ILMN_1815723	NUP35	nucleoporin 35kDa (NUP35), mRNA.	NM_138285.3	0.2	0.09	-1.27	3.42	-0.6	0.71	-1.21	4.38	-0.62	0.43	-1.47	2.94
ILMN_1726720	NUSAP1	nucleolar and spindle associated protein 1 (NUSAP1), transcript variant 2, mRNA.	NM_018454.5	-0.24	0.36	-1.32	10.86	-0.54	2.85	-1.23	17.04	-0.69	3.78	-1.08	5.97
ILMN_1785852	OBFC2A	oligonucleotide/oligosaccharide-binding fold containing 2A (OBFC2A), mRNA.	NM_001031716.1	0.33	0.5	-1.71	12.65	0.26	0.42	-1.09	10.27	-1.35	10.14	-2.04	12.27
ILMN_1749846	OMD	osteomodulin (OMD), mRNA.	NM_005014.1	-0.9	3.75	-1.36	9.64	-1.26	6.01	-1.25	7.99	0.01	0	-0.46	0.89
ILMN_1681304	PAN3	PAN3 polyA specific ribonuclease subunit homolog (S. cerevisiae) (PAN3), mRNA.	NM_175854.5	1.4	3.88	-0.21	0.17	-0.61	1.14	-1.17	5.91	-0.56	0.56	-1.6	4.64
ILMN_1736441	PDXP	pyridoxal (pyridoxine, vitamin B6) phosphatase (PDXP), mRNA.	NM_020315.4	-1.17	7.14	-1.11	8.6	-0.54	2.85	-1.05	13.25	-0.51	1.91	0.06	0.02
ILMN_2155272	PIF1	PIF1 5'-to-3' DNA helicase homolog (S. cerevisiae) (PIF1), mRNA.	NM_025049.2	-1.02	4.69	-1.62	12.05	-0.57	2.12	-1.36	14.51	-0.79	3.25	-0.6	1.58
ILMN_1705985	PIGA	phosphatidylinositol glycan anchor biosynthesis, class A (paroxysmal nocturnal hemoglobinuria) (PIGA), transcript variant 3, mRNA.	NM_020473.2	0.37	0.68	-0.92	5.67	-1	7.24	-1.68	22.08	-0.68	2.63	-1.29	6.83
ILMN_1815023	PIM1	pim-1 oncogene (PIM1), mRNA.	NM_002648.2	0.3	0.15	-1.53	4.29	0.36	0.85	-1.63	20.26	-1.99	20.2	-1.82	3.93
ILMN_1733666	PLDN	pallidin homolog (mouse) (PLDN), mRNA.	NM_012388.2	-0.46	0.34	-1.11	2.82	-0.95	2.61	-1.25	6.21	-0.3	0.11	-0.65	0.53
ILMN_1706610	PLEKHA9	pleckstrin homology domain containing, family A (phosphoinositide binding specific) member 9 (PLEKHA9), mRNA.	NM_015899.1	-0.86	3.29	-1.53	10.93	-0.97	9.12	-1.37	20.86	-0.4	1.12	-0.68	1.93
ILMN_1789123	PLK4	polo-like kinase 4 (Drosophila) (PLK4), mRNA.	NM_014264.3	0.17	0.11	-0.95	3.73	-1.02	5.32	-1.71	17.41	-0.69	1.84	-1.12	3.29
ILMN_1771599	PLOD2	procollagen-lysine, 2-oxoglutarate 5-dioxygenase 2 (PLOD2), transcript variant 2, mRNA.	NM_000935.2	0.43	0.99	-1.12	7.99	-0.7	3.56	-1.06	10.45	-0.36	0.53	-1.55	9.39
ILMN_1680223	PNPLA8	patatin-like phospholipase domain containing 8 (PNPLA8), mRNA.	NM_015723.2	0.02	0.01	-1.2	8.9	-0.64	2.95	-1.24	13.61	-0.6	1.98	-1.22	6.64
ILMN_1696713	POLA2	polymerase (DNA directed), alpha 2 (70kD subunit) (POLA2), mRNA.	NM_002689.2	-0.41	1.75	-1.33	14.86	0.4	1.4	-0.79	7.64	-1.19	10.68	-0.92	6.92
ILMN_1751773	POLD3	polymerase (DNA-directed), delta 3, accessory subunit (POLD3), mRNA.	NM_006591.1	-0.26	0.23	-1.26	6.02	-0.57	1.08	-1.62	11.43	-1.05	3.02	-1	2.66
ILMN_1740291	POLQ	polymerase (DNA directed), theta (POLQ), mRNA.	NM_199420.3	-0.42	1.05	-1.31	10.75	-0.5	1.56	-1.3	13.57	-0.81	3.47	-0.89	4.31
ILMN_1767459	POLR3B	polymerase (RNA) III (DNA directed) polypeptide B (POLR3B), mRNA.	NM_018082.4	-0.01	0	-1.04	8.09	-0.88	9.38	-1.6	30.07	-0.72	5.5	-1.03	5.75
ILMN_2322842	PPHLN1	periphilin 1 (PPHLN1), transcript variant 4, mRNA.	NM_201440.1	-0.37	0.26	-1.25	3.79	-0.83	1.65	-1.5	7.42	-0.67	0.66	-0.88	1.18
ILMN_1716862	PPM1B	protein phosphatase 1B (formerly 2C), magnesium-dependent, beta isoform (PPM1B), transcript variant 2, mRNA.	NM_177968.2	-0.54	2.6	-2.61	26.3	-1.15	11.49	-3.02	53.2	-1.87	23.11	-2.07	17.88
ILMN_2321485	PPP1R8	protein phosphatase 1, regulatory (inhibitor) subunit 8 (PPP1R8), transcript variant 1, mRNA.	NM_014110.3	1.23	1.35	-0.66	0.6	-0.94	1.6	-1.5	5.69	-0.56	0.27	-1.89	2.96
ILMN_1785699	PTHLH	parathyroid hormone-like hormone (PTHLH), transcript variant 3, mRNA.	NM_198964.1	1.28	7.49	0.16	0.23	1.3	11.27	0.23	0.55	-1.06	6.86	-1.13	5.74
ILMN_1753196	PTTG1	pituitary tumor-transforming 1 (PTTG1), mRNA.	NM_004219.2	-0.61	0.47	-1.09	2.25	-1.17	1.87	-1.58	4.81	-0.41	0.1	-0.48	0.2
ILMN_1747184	PUS7L	pseudouridylate synthase 7 homolog (S. cerevisiae)-like (PUS7L), transcript variant 1, mRNA.	NM_001098615.1	0.7	1.31	-0.42	0.74	-0.93	4.75	-1.35	12.44	-0.42	0.54	-1.12	3.14
ILMN_1667417	RAB23	RAB23, member RAS oncogene family (RAB23), transcript variant 1, mRNA.	NM_016277.3	-0.58	0.7	-1.31	4.92	-1.39	8.34	-1.55	13.25	-0.17	0.05	-0.73	0.98
ILMN_2346997	RAB23	RAB23, member RAS oncogene family (RAB23), transcript variant 1, mRNA.	NM_016277.3	-0.89	4.46	-1.8	15.27	-1.45	16.42	-1.86	29.24	-0.41	0.97	-0.91	4.33
ILMN_1748578	RAD21	RAD21 homolog (S. pombe) (RAD21), mRNA.	NM_006265.1	-1.87	1.95	-1.93	3.04	-0.78	1.43	-1.04	3.65	-0.26	0.07	-0.06	0
ILMN_2238928	RAD51C	RAD51 homolog C (S. cerevisiae) (RAD51C), transcript variant 1, mRNA.	NM_058216.1	-0.29	0.41	-1.01	6.42	-0.61	2.28	-1.56	17.47	-0.95	4.75	-0.72	2.38
ILMN_1760635	RAD51C	RAD51 homolog C (S. cerevisiae) (RAD51C), transcript variant 1, mRNA.	NM_058216.1	-0.41	0.69	-1.14	6.89	-0.73	2.4	-1.42	11.46	-0.69	1.52	-0.73	2.1
ILMN_1722127	RAD54B	RAD54 homolog B (S. cerevisiae) (RAD54B), mRNA.	NM_012415.2	0.41	0.45	-0.7	1.98	-1.07	4.88	-1.27	9.01	-0.2	0.07	-1.11	3.03
ILMN_2148469	RASL11B	RAS-like, family 11, member B (RASL11B), mRNA.	NM_023940.2	-0.02	0.02	-1.08	10.21	-0.85	6.55	-1.28	17.49	-0.44	1.2	-1.06	7.34
ILMN_1696591	RB1	retinoblastoma 1 (including osteosarcoma) (RB1), mRNA.	NM_000321.2	1.02	1.65	-0.32	0.28	-1.07	3.83	-1.23	6.82	-0.16	0.04	-1.35	2.65
ILMN_1736796	RB1CC1	RB1-inducible coiled-coil 1 (RB1CC1), transcript variant 2, mRNA.	NM_001083617.1	0.36	0.56	-0.83	4.26	-0.29	0.57	-1.09	11.02	-0.8	3.83	-1.18	5.37
ILMN_1782745	RBL1	retinoblastoma-like 1 (p107) (RBL1), transcript variant 1, mRNA.	NM_002895.2	-0.96	4.34	-1.06	6.84	-0.64	2.23	-1.06	8.17	-0.42	0.55	-0.09	0.03
ILMN_1743104	RBM4B	RNA binding motif protein 4B (RBM4B), mRNA.	NM_031492.2	-0.33	0.97	-1.43	15.01	-0.47	3.13	-1.85	39.05	-1.38	20.16	-1.1	8.26
ILMN_1802162	RFESD	Rieske (Fe-S) domain containing (RFESD), mRNA.	NM_173362.2	0.63	1.19	-0.41	0.78	-0.89	3.47	-1.2	8.23	-0.3	0.18	-1.04	3.03
ILMN_2100458	RFESD	Rieske (Fe-S) domain containing (RFESD), mRNA.	NM_173362.2	0.32	0.33	-0.83	3.14	-0.5	1.61	-1.12	10.81	-0.63	2	-1.14	3.75
ILMN_1687107	RFWD3	ring finger and WD repeat domain 3 (RFWD3), mRNA.	NM_018124.3	-0.25	0.39	-1.79	15.39	-0.27	0.76	-1.49	25.16	-1.23	13.5	-1.54	10.01
ILMN_1652735	RFXAP	regulatory factor X-associated protein (RFXAP), mRNA.	NM_000538.2	0.45	1.16	-0.94	6.53	-0.4	1	-1.65	20.13	-1.26	8.85	-1.39	8.44
ILMN_2197365	RGS2	regulator of G-protein signalling 2, 24kDa (RGS2), mRNA.	NM_002923.1	-0.22	0.18	-1.79	10.6	-0.03	0.02	-1.81	14.36	-1.78	9.55	-1.57	6.48
ILMN_2149053	RIF1	RAP1 interacting factor homolog (yeast) (RIF1), mRNA.	NM_018151.3	-0.2	0.18	-1.45	9.41	-0.21	0.25	-1.21	11.27	-1.01	5.15	-1.25	5.46
ILMN_2119535	RIPK1	receptor (TNFRSF)-interacting serine-threonine kinase 1 (RIPK1), mRNA.	NM_003804.3	-0.46	1	-1.01	6.49	-0.54	1.42	-1.5	13.96	-0.97	3.9	-0.56	1.4
ILMN_1692199	RNF103	ring finger protein 103 (RNF103), mRNA.	NM_005667.2	-0.67	2.14	-1.05	6.63	-0.83	3.43	-1.23	9.8	-0.4	0.43	-0.38	0.54
ILMN_1704056	RPPH1	ribonuclease P RNA component H1 (RPPH1) on chromosome 14.	NR_002312.1	-1.53	6.32	-0.86	3.24	-1.08	6.24	-0.56	2.43	0.52	0.93	0.67	1.23
ILMN_1657515	RPS6KA5	ribosomal protein S6 kinase, 90kDa, polypeptide 5 (RPS6KA5), transcript variant 1, mRNA.	NM_004755.2	-0.29	0.43	-1.32	9.5	-0.71	4.83	-1.68	26.85	-0.97	7.71	-1.03	4.61
ILMN_1788223	RSPH3	radial spoke head 3 homolog (Chlamydomonas) (RSPH3), mRNA.	NM_031924.3	-0.47	1.66	-1.1	9.97	-0.59	3.57	-1.15	15.92	-0.56	2.49	-0.64	2.83
ILMN_1814305	SAMD9	sterile alpha motif domain containing 9 (SAMD9), mRNA.	NM_017654.2	1.49	8.62	-0.8	4.28	1.16	6.65	-0.38	1	-1.54	9.88	-2.29	14.31
ILMN_1700896	SAP30	Sin3A-associated protein, 30kDa (SAP30), mRNA.	NM_003864.3	-0.57	1.49	-1.45	10.42	0.03	0.02	-1.06	8.64	-1.09	5.91	-0.89	3.39
ILMN_1768050	SCOC	short coiled-coil protein (SCOC), mRNA.	NM_032547.1	0.11	0.07	-1.1	5.82	-0.69	2.46	-1.07	7.79	-0.37	0.37	-1.2	4.69
ILMN_1814494	SEMA6D	sema domain, transmembrane domain (TM), and cytoplasmic domain, (semaphorin) 6D (SEMA6D), transcript variant 5, mRNA.	NM_153619.1	1.56	7.49	0.06	0.05	1.46	4.7	-0.1	0.06	-1.56	4.45	-1.5	6.63
ILMN_1671854	2001-09-01	PREDICTED: septin 1, transcript variant 3 (SEPT1), mRNA.	XM_944593.1	-0.63	2.08	-1.14	8.13	-0.54	1.29	-1.53	13.04	-0.99	3.59	-0.51	1.26
ILMN_1746699	SGOL2	shugoshin-like 2 (S. pombe) (SGOL2), mRNA.	NM_152524.3	0.31	0.23	-0.93	2.75	-1.68	9.1	-2.07	16.72	-0.39	0.23	-1.24	3.04
ILMN_1805996	SIN3A	SIN3 homolog A, transcription regulator (yeast) (SIN3A), mRNA.	NM_015477.1	0.2	0.47	-0.91	10.13	-0.05	0.05	-1.29	21.01	-1.24	14.22	-1.11	10
ILMN_2344002	SIP1	survival of motor neuron protein interacting protein 1 (SIP1), transcript variant beta, mRNA.	NM_001009182.1	-0.01	0.01	-1.2	8.71	-0.57	1.2	-1.34	8.97	-0.77	1.64	-1.19	6.23
ILMN_2344007	SIP1	survival of motor neuron protein interacting protein 1 (SIP1), transcript variant beta, mRNA.	NM_001009182.1	-0.42	0.36	-2.09	9.42	-0.59	0.84	-1.88	11.42	-1.29	3.45	-1.67	4.76
ILMN_1743402	SIX4	SIX homeobox 4 (SIX4), mRNA.	NM_017420.3	0.72	3.07	-0.59	3.01	-0.24	0.4	-1.41	16.73	-1.16	8.28	-1.32	7.9
ILMN_1793672	SIX5	SIX homeobox 5 (SIX5), mRNA.	NM_175875.3	0.44	0.82	-0.67	2.85	0.23	0.34	-1.3	13.79	-1.53	12.72	-1.12	4.69
ILMN_1791002	SKP2	S-phase kinase-associated protein 2 (p45) (SKP2), transcript variant 1, mRNA.	NM_005983.2	-0.76	5.14	-1.01	10.37	-0.69	3.27	-1.03	9.47	-0.34	0.42	-0.25	0.49
ILMN_1687958	SLC25A22	solute carrier family 25 (mitochondrial carrier: glutamate), member 22 (SLC25A22), nuclear gene encoding mitochondrial protein, mRNA.	NM_024698.4	-1.68	9.84	-1.15	7.45	-1.1	5.52	-0.9	5.19	0.2	0.07	0.53	1.15
ILMN_1651799	SLC38A2	solute carrier family 38, member 2 (SLC38A2), mRNA.	NM_018976.3	0.76	1.85	-1.13	5.41	0.41	1.16	-1.13	11.76	-1.54	13.84	-1.89	8.52
ILMN_1773643	SLC38A9	solute carrier family 38, member 9 (SLC38A9), mRNA.	NM_173514.1	0.3	0.35	-1.27	7.54	-0.54	2.12	-1.56	20.09	-1.03	6.64	-1.57	7.47
ILMN_1656186	SLC41A1	solute carrier family 41, member 1 (SLC41A1), mRNA.	NM_173854.4	-0.92	4.69	-1.11	8.33	-1.09	7.65	-1.1	10.25	-0.01	0	-0.18	0.13
ILMN_1676449	SLIT2	slit homolog 2 (Drosophila) (SLIT2), mRNA.	NM_004787.1	-0.94	2.03	-1.45	6.22	-0.77	3.06	-1.22	9.95	-0.45	0.62	-0.51	0.46
ILMN_1767068	SMAD6	SMAD family member 6 (SMAD6), mRNA.	NM_005585.3	-1.61	5.47	-2.16	10.95	-0.08	0.08	-1.66	24.46	-1.59	16.75	-0.55	0.57
ILMN_1748923	SMC2	structural maintenance of chromosomes 2 (SMC2), transcript variant 1, mRNA.	NM_001042550.1	1.25	2.47	-0.13	0.08	-0.96	2.84	-1.12	5.29	-0.16	0.04	-1.39	2.78
ILMN_1683302	SMC4	structural maintenance of chromosomes 4 (SMC4), transcript variant 1, mRNA.	NM_005496.3	-0.83	2.45	-1.31	7.54	-0.65	2.38	-1.09	8.83	-0.44	0.66	-0.49	0.72
ILMN_2096747	SNORA33	small nucleolar RNA, H/ACA box 33 (SNORA33) on chromosome 6.	NR_002436.1	-1.18	4.06	-1.12	5.13	-1.42	11.47	-1.26	12.11	0.16	0.07	0.06	0.01
ILMN_1666599	SNORD30	small nucleolar RNA, C/D box 30 (SNORD30) on chromosome 11.	NR_002561.1	-0.45	0.43	-1.01	3.12	-1.18	4.82	-1.67	12.2	-0.5	0.46	-0.55	0.52
ILMN_1721081	SP4	Sp4 transcription factor (SP4), mRNA.	NM_003112.3	-0.78	1.86	-1.44	7.71	-1.48	11.35	-1.67	17.69	-0.19	0.08	-0.66	1.22
ILMN_1796738	SPAST	spastin (SPAST), transcript variant 1, mRNA.	NM_014946.3	-0.61	1.28	-1.37	7.82	-0.97	5.98	-1.4	15.06	-0.43	0.72	-0.76	1.85
ILMN_1814281	SPC25	SPC25, NDC80 kinetochore complex component, homolog (S. cerevisiae) (SPC25), mRNA.	NM_020675.3	-0.71	3.99	-1.63	16.31	-0.6	2.13	-1.22	11.39	-0.63	1.73	-0.92	5.76
ILMN_1667315	STAG3L1	stromal antigen 3-like 1 (STAG3L1), transcript variant 1, mRNA.	NM_018991.2	-0.65	0.8	-1.85	7.88	-0.53	1.15	-1.53	12.48	-1	3.49	-1.2	2.56
ILMN_1682799	STAMBPL1	STAM binding protein-like 1 (STAMBPL1), mRNA.	NM_020799.2	0.74	3.13	-0.28	0.7	0.35	0.55	-0.96	5.95	-1.32	6.9	-1.03	5.21
ILMN_2413650	STIL	SCL/TAL1 interrupting locus (STIL), transcript variant 2, mRNA.	NM_003035.2	-0.8	1.94	-1.04	4.55	-0.48	1.86	-1.02	10.71	-0.53	1.69	-0.24	0.11
ILMN_1770084	TACC1	transforming, acidic coiled-coil containing protein 1 (TACC1), mRNA.	NM_006283.1	-0.22	0.32	-1.04	7.95	-0.23	0.48	-1.43	21.89	-1.21	11.85	-0.82	3.72
ILMN_1733562	TFB1M	transcription factor B1, mitochondrial (TFB1M), mRNA.	NM_016020.1	-0.36	0.27	-1.1	3.26	-0.28	0.38	-1.13	8.66	-0.85	2.98	-0.73	0.88
ILMN_1712634	TIA1	TIA1 cytotoxic granule-associated RNA binding protein (TIA1), transcript variant 1, mRNA.	NM_022037.1	-0.4	0.29	-1.68	6.4	-0.67	1.52	-1.53	10.55	-0.87	1.99	-1.29	2.68
ILMN_2388466	TIA1	TIA1 cytotoxic granule-associated RNA binding protein (TIA1), transcript variant 2, mRNA.	NM_022173.1	-0.09	0.06	-1.53	10.16	-0.88	5.53	-1.66	21.54	-0.78	3.63	-1.44	6.84
ILMN_2403006	TJP1	tight junction protein 1 (zona occludens 1) (TJP1), transcript variant 2, mRNA.	NM_175610.2	0.59	1.1	-0.6	1.74	-0.76	2.68	-1.25	9.4	-0.49	0.66	-1.19	4.08
ILMN_2103761	TLE4	transducin-like enhancer of split 4 (E(sp1) homolog, Drosophila) (TLE4), mRNA.	NM_007005.3	1.03	2.84	-0.53	1.15	0.34	0.44	-0.87	4.32	-1.21	5	-1.56	5.6
ILMN_1732566	TMTC3	transmembrane and tetratricopeptide repeat containing 3 (TMTC3), mRNA.	NM_181783.2	1.07	2.1	-0.15	0.1	-1.09	5.85	-1.2	9.3	-0.11	0.03	-1.22	2.52
ILMN_1837935	TNPO1	transportin 1 (TNPO1), transcript variant 2, mRNA.	NM_153188.2	0.18	0.09	-1.15	3.65	-1.23	5.08	-1.3	7.6	-0.07	0.01	-1.33	3.14
ILMN_1686097	TOP2A	topoisomerase (DNA) II alpha 170kDa (TOP2A), mRNA.	NM_001067.2	0.17	0.09	-1.2	4.04	-0.74	2.17	-1.78	15.25	-1.05	3.6	-1.38	3.41
ILMN_1658144	TRIP11	thyroid hormone receptor interactor 11 (TRIP11), mRNA.	NM_004239.1	-1.04	4.34	-1.44	9.47	-0.9	6.62	-1.35	17.52	-0.46	1.18	-0.39	0.52
ILMN_1700337	TROAP	trophinin associated protein (tastin) (TROAP), mRNA.	NM_005480.2	-0.87	3.33	-1.39	9.55	-0.97	6.76	-1.92	26.55	-0.95	5.54	-0.52	1.1
ILMN_1668795	TTC30B	tetratricopeptide repeat domain 30B (TTC30B), mRNA.	NM_152517.2	0.76	2.5	-0.63	2.6	0.95	5.61	-0.05	0.05	-1	5.27	-1.39	6.85
ILMN_1788166	TTK	TTK protein kinase (TTK), mRNA.	NM_003318.3	0.66	0.97	-1.04	3.58	-0.75	2.69	-1.78	17.55	-1.03	4.28	-1.7	5.66
ILMN_1717056	TXNRD1	thioredoxin reductase 1 (TXNRD1), transcript variant 5, mRNA.	NM_001093771.1	-0.87	2.69	-1.45	8.6	-0.06	0.04	-1.4	13.79	-1.34	8.74	-0.58	1.05
ILMN_2324421	TXNRD1	thioredoxin reductase 1 (TXNRD1), transcript variant 4, mRNA.	NM_182743.1	-0.91	1.16	-1.77	5.88	-0.1	0.06	-1.4	10.22	-1.3	5.81	-0.86	0.93
ILMN_2265654	UBE2C	ubiquitin-conjugating enzyme E2C (UBE2C), transcript variant 2, mRNA.	NM_181799.1	-0.94	3.7	-1.36	9.02	-0.54	1.46	-1.13	8.52	-0.58	1.18	-0.42	0.64
ILMN_1711470	UBE2T	ubiquitin-conjugating enzyme E2T (putative) (UBE2T), mRNA.	NM_014176.2	-0.47	0.53	-1.33	5.69	-0.49	0.41	-1.3	4.21	-0.81	0.7	-0.86	1.64
ILMN_1738407	ULBP1	UL16 binding protein 1 (ULBP1), mRNA.	NM_025218.2	-0.36	0.84	-1.16	9.61	-0.64	2.21	-1.22	10.35	-0.58	1.25	-0.8	3.75
ILMN_1705144	ULK1	unc-51-like kinase 1 (C. elegans) (ULK1), mRNA.	NM_003565.1	-0.48	0.7	-1.8	10.62	-0.58	1.98	-2.01	24.68	-1.43	10.2	-1.33	4.85
ILMN_1735052	ULK1	unc-51-like kinase 1 (C. elegans) (ULK1), mRNA.	NM_003565.1	-0.47	0.66	-1.88	10.87	-0.46	1.04	-1.92	20.92	-1.46	9.32	-1.41	5.16
ILMN_1735908	UTP15	UTP15, U3 small nucleolar ribonucleoprotein, homolog (S. cerevisiae) (UTP15), mRNA.	NM_032175.2	-0.28	0.34	-1.03	6.04	-0.63	2.05	-1.05	7.76	-0.42	0.53	-0.75	2.29
ILMN_1657679	VAV3	vav 3 guanine nucleotide exchange factor (VAV3), transcript variant 1, mRNA.	NM_006113.4	1.74	5.88	0.26	0.24	0.76	2.61	-0.47	1.36	-1.23	5.71	-1.49	4.21
ILMN_1771697	VRK3	vaccinia related kinase 3 (VRK3), transcript variant 2, mRNA.	NM_001025778.1	-0.71	0.88	-1.61	6.03	-0.14	0.11	-1.22	8.47	-1.08	4.17	-0.9	1.31
ILMN_1704621	WDR44	WD repeat domain 44 (WDR44), mRNA.	NM_019045.3	0.49	0.81	-1.02	4.93	-1.13	6.37	-1.6	15.39	-0.47	0.67	-1.51	6.5
ILMN_1778561	WEE1	WEE1 homolog (S. pombe) (WEE1), mRNA.	NM_003390.2	0.38	0.8	-0.94	6.35	-0.31	0.86	-1.27	17.03	-0.95	7.03	-1.33	7.65
ILMN_1725121	XPO1	exportin 1 (CRM1 homolog, yeast) (XPO1), mRNA.	NM_003400.3	1.19	3.22	-0.26	0.27	-0.75	2.03	-1.32	8.39	-0.57	0.71	-1.44	4.31
ILMN_1807535	YWHAE	tyrosine 3-monooxygenase/tryptophan 5-monooxygenase activation protein, epsilon polypeptide (YWHAE), mRNA.	NM_006761.3	-0.94	3.72	-1.01	5.82	-0.93	3.82	-1.01	6.13	-0.08	0.02	-0.07	0.02
ILMN_1651365	ZBED2	zinc finger, BED-type containing 2 (ZBED2), mRNA.	NM_024508.3	1.52	6.44	-0.8	2.91	1.21	12.73	-0.28	1.05	-1.5	16.38	-2.32	11.2
ILMN_2093500	ZBED5	zinc finger, BED-type containing 5 (ZBED5), mRNA.	NM_021211.2	0.7	0.56	-1.88	5.52	0.68	1.48	-0.91	3.83	-1.59	7.06	-2.58	6.43
ILMN_1664424	ZBED5	zinc finger, BED-type containing 5 (ZBED5), mRNA.	NM_021211.2	1.29	1.45	-1.66	3.49	-0.24	0.18	-1.81	12	-1.57	6.09	-2.95	6.34
ILMN_1739659	ZDHHC6	zinc finger, DHHC-type containing 6 (ZDHHC6), mRNA.	NM_022494.1	0.34	0.68	-0.68	3.88	-0.65	3.94	-1.03	12.44	-0.38	0.89	-1.02	5.32
ILMN_1652407	ZMYND8	zinc finger, MYND-type containing 8 (ZMYND8), transcript variant 1, mRNA.	NM_183047.1	0.62	0.67	-0.62	1.01	0	0	-1.1	7.34	-1.1	4.53	-1.24	2.48
ILMN_1755303	ZNF217	zinc finger protein 217 (ZNF217), mRNA.	NM_006526.2	0.56	0.33	-1.07	1.79	-0.12	0.05	-1.21	3.33	-1.09	1.33	-1.62	2.54
ILMN_2061310	ZNF280C	zinc finger protein 280C (ZNF280C), mRNA.	NM_017666.2	-0.82	3.22	-1.53	11.3	-0.81	6.52	-1.27	18.28	-0.46	1.49	-0.71	2.23
ILMN_2107933	ZNF285A	zinc finger protein 285A (ZNF285A), mRNA.	NM_152354.2	0.1	0.11	-0.96	7.53	-0.68	3.74	-1.25	14.93	-0.56	1.92	-1.06	6.32
ILMN_1742541	ZNF518A	zinc finger protein 518A (ZNF518A), mRNA.	NM_014803.3	0.73	1.79	-1.12	5.59	-0.19	0.25	-1.31	14.33	-1.12	7.32	-1.86	8.6
ILMN_1677785	ZNF559	zinc finger protein 559 (ZNF559), mRNA.	NM_032497.1	0.22	0.21	-1.03	5.34	-0.42	0.91	-1.13	8.94	-0.7	2.02	-1.25	5.09
ILMN_1688346	ZNF800	zinc finger protein 800 (ZNF800), mRNA.	NM_176814.3	0.01	0	-1.43	7.11	-0.45	1.29	-1.27	13.07	-0.82	3.6	-1.44	5.05
ILMN_1757742	ZRANB1	zinc finger, RAN-binding domain containing 1 (ZRANB1), mRNA.	NM_017580.2	-1.03	1.42	-1.01	2.03	-0.92	4.36	-1.05	7.66	-0.14	0.04	0.03	0
ILMN_1777061	ZSWIM6	PREDICTED: zinc finger, SWIM-type containing 6 (ZSWIM6), mRNA.	XM_035299.8	-0.61	0.78	-1.46	5.86	-1.03	5.4	-1.28	10.68	-0.25	0.13	-0.84	1.35
ILMN_1673566	ADAMTS1	ADAM metallopeptidase with thrombospondin type 1 motif, 1 (ADAMTS1), mRNA.	NM_006988.3	2.29	14.44	1.26	8.44	1.19	7.93	1.32	12.48	0.13	0.05	-1.04	4.41
ILMN_2194828	C16orf53	chromosome 16 open reading frame 53 (C16orf53), mRNA.	NM_024516.2	0.21	0.18	-0.8	3.11	1.07	3.67	0.19	0.19	-0.88	1.86	-1.02	3.13
ILMN_2161577	CXCL6	chemokine (C-X-C motif) ligand 6 (granulocyte chemotactic protein 2) (CXCL6), mRNA.	NM_002993.2	1.74	11.96	-0.02	0.02	1.39	8.49	0.9	5.12	-0.49	0.63	-1.76	11.68
ILMN_1703913	DST	dystonin (DST), transcript variant 1e, mRNA.	NM_001723.4	1.88	8.1	0.55	1.24	1.6	10.29	0.93	5.08	-0.67	1.33	-1.34	4.37
ILMN_2046024	DUSP11	dual specificity phosphatase 11 (RNA/RNP complex 1-interacting) (DUSP11), mRNA.	NM_003584.1	-0.3	0.29	-1.33	6.87	1.09	5.01	0.63	2.37	-0.46	0.49	-1.03	3.02
ILMN_1712431	FAM113B	family with sequence similarity 113, member B (FAM113B), mRNA.	NM_138371.1	1.3	9.64	0.18	0.39	1.09	9.01	0.36	1.42	-0.73	3.43	-1.12	7.38
ILMN_1682599	GPRC5A	G protein-coupled receptor, family C, group 5, member A (GPRC5A), mRNA.	NM_003979.3	0.96	4.49	-0.27	0.58	1.43	13	0.47	2.18	-0.96	5.38	-1.23	6.39
ILMN_2115340	HIST2H4A	histone cluster 2, H4a (HIST2H4A), mRNA.	NM_003548.2	0.66	3.09	-0.36	1.39	1.19	8.21	0.48	1.91	-0.71	2.34	-1.02	6.21
ILMN_1873863		full-length cDNA clone CS0DC025YP03 of Neuroblastoma Cot 25-normalized of (human)		1.07	4.34	0	0	1.03	5.95	0.34	0.9	-0.69	2.06	-1.07	4.06
ILMN_1866216		BX114974 NCI_CGAP_Kid3 cDNA clone IMAGp998C023886, mRNA sequence		-1.92	3.64	-0.97	1.42	-0.58	0.89	0.51	1.02	1.09	2.61	0.96	0.79
ILMN_1720710	HSPB3	heat shock 27kDa protein 3 (HSPB3), mRNA.	NM_006308.1	1.72	8.66	0.42	0.98	1.69	15.85	1.17	11.12	-0.51	1.12	-1.29	5.26
ILMN_1687275	JUB	jub, ajuba homolog (Xenopus laevis) (JUB), transcript variant 1, mRNA.	NM_032876.4	1.64	5.94	0.59	1.3	1.4	8.15	0.62	2.29	-0.78	1.98	-1.05	2.47
ILMN_1807042	MARCKS	myristoylated alanine-rich protein kinase C substrate (MARCKS), mRNA.	NM_002356.5	1.19	6.18	-0.05	0.05	1.1	9.98	0.12	0.2	-0.98	7.08	-1.24	6.23
ILMN_1658015	MBNL2	muscleblind-like 2 (Drosophila) (MBNL2), transcript variant 1, mRNA.	NM_144778.2	0.38	0.53	-0.84	3.79	1.05	3.55	0.94	3.98	-0.11	0.02	-1.21	4.9
ILMN_1663873	MMP13	matrix metallopeptidase 13 (collagenase 3) (MMP13), mRNA.	NM_002427.2	3.28	13.7	0.5	0.78	1.47	4.56	0.63	1.17	-0.84	0.97	-2.78	10.78
ILMN_1719792	PHLDB2	pleckstrin homology-like domain, family B, member 2 (PHLDB2), mRNA.	NM_145753.1	2.76	10.69	0.51	0.77	1.32	5.63	1.06	5.04	-0.26	0.09	-2.25	7.64
ILMN_2179778	PHLDB2	pleckstrin homology-like domain, family B, member 2 (PHLDB2), mRNA.	NM_145753.1	2.05	9.94	0.28	0.39	1.49	8.38	1.26	8.13	-0.24	0.09	-1.77	7.69
ILMN_1753439	RPTN	PREDICTED: repetin (RPTN), mRNA.	XM_937200.2	2.52	17.63	0.9	5.92	1.65	8.7	1	4.59	-0.65	0.9	-1.62	10.29
ILMN_2082585	SNAI2	snail homolog 2 (Drosophila) (SNAI2), mRNA.	NM_003068.3	1.62	2.08	0.38	0.21	0.14	0.14	1.04	9.16	0.9	4.41	-1.24	1.08
ILMN_1698646	TUBG1	tubulin, gamma 1 (TUBG1), mRNA.	NM_001070.3	-1.09	2.42	-0.56	0.98	1.01	1.71	1.16	3.21	0.15	0.02	0.53	0.44
ILMN_2362368	U2AF1	U2 small nuclear RNA auxiliary factor 1 (U2AF1), transcript variant b, mRNA.	NM_001025203.1	-0.86	2.07	-1.07	4.46	1.19	4.21	1.42	7.94	0.23	0.06	-0.21	0.08
ILMN_2150258	ZFP36L2	zinc finger protein 36, C3H type-like 2 (ZFP36L2), mRNA.	NM_006887.3	1.55	2.68	0.51	0.45	1.06	3.42	0.08	0.05	-0.99	2.25	-1.04	1.09
ILMN_1658094	ZNF365	zinc finger protein 365 (ZNF365), transcript variant A, mRNA.	NM_014951.2	2.18	9.45	0.09	0.06	1.04	6.08	0.61	2.93	-0.44	0.63	-2.09	8.44
ILMN_1773417	AKR1C2	PREDICTED: aldo-keto reductase family 1, member C2 (dihydrodiol dehydrogenase 2; bile acid binding protein; 3-alpha hydroxysteroid dehydrogenase, type III), transcript variant 4 (AKR1C2), mRNA.	XM_943415.1	1.94	10.67	1.19	6.91	1.8	14.28	0.77	4.09	-1.03	4.31	-0.75	2
ILMN_1713124	AKR1C3	aldo-keto reductase family 1, member C3 (3-alpha hydroxysteroid dehydrogenase, type II) (AKR1C3), mRNA.	NM_003739.4	1.46	8.04	0.8	4.13	2	19.96	0.9	6.64	-1.1	6.17	-0.65	1.78
ILMN_1687757	AKR1C4	aldo-keto reductase family 1, member C4 (chlordecone reductase; 3-alpha hydroxysteroid dehydrogenase, type I; dihydrodiol dehydrogenase 4) (AKR1C4), mRNA.	NM_001818.2	1.23	3.29	0.59	1.18	1.75	18.07	0.73	5.06	-1.03	6.16	-0.64	0.76
ILMN_1750075	DMTF1	cyclin D binding myb-like transcription factor 1 (DMTF1), mRNA.	NM_021145.2	1	3	0.06	0.04	-0.75	2.75	-1.06	7.43	-0.31	0.22	-0.95	2.48
ILMN_1896699		hd27b07.y1 Human Retina cDNA (Un-normalized, unamplified): hd/he cDNA clone hd27b07 5, mRNA sequence		-0.58	1.69	0.48	1.71	-1.08	7.29	-0.64	3.72	0.43	0.73	1.06	4.89
ILMN_1855430	LOC199800	PREDICTED: hypothetical protein LOC199800 (LOC199800), mRNA.	XM_001134053.1	-0.69	1.84	0.4	0.95	-1.08	9.21	-0.46	2.51	0.62	2.43	1.09	4.14
ILMN_2407235	LOC402057	similar to 40S ribosomal protein S17 (LOC402057), mRNA.	NM_001080499.1	0.94	2.22	1.14	4.46	-1.61	7.65	-1.39	7.83	0.21	0.06	0.19	0.06
ILMN_1685985	LOC649150	PREDICTED: similar to eukaryotic translation elongation factor 1 alpha 2 (LOC649150), mRNA.	XR_019269.1	0.81	1.22	1.1	3.3	-2.1	17.6	-2.05	21.33	0.04	0.01	0.29	0.1
ILMN_2303166	MBNL3	muscleblind-like 3 (Drosophila) (MBNL3), transcript variant R, mRNA.	NM_133486.1	0.81	0.89	1.1	2.52	-0.95	1.81	-1.22	4.23	-0.27	0.06	0.3	0.08
ILMN_1805064	SCARNA9	small Cajal body-specific RNA 9 (SCARNA9) on chromosome 11.	NR_002569.1	1.05	2.27	0.83	2.14	-2.62	12.53	-2.83	18.1	-0.21	0.04	-0.22	0.06
ILMN_2367020	SEC61G	Sec61 gamma subunit (SEC61G), transcript variant 1, mRNA.	NM_014302.3	1.69	3.37	0.8	1.16	-1.03	2.05	-0.76	1.59	0.27	0.06	-0.89	0.82

## Sheet: BI1_12h
Illumina Identifier	HGNC gene symbol	Gene Description	Refseq ID	BI1 LR(0.08uM+TGFb/UT+DMSO+TGFb)	BI1 -log10(pVAL(0.08uM+TGFb/UT+DMSO+TGFb))	BI1 LR(2uM+TGFb/UT+DMSO+TGFb)	BI1 -log10(pVAL(2uM+TGFb/UT+DMSO+TGFb))	BI1 LR(0.08uM-TGFb/UT+DMSO)	BI1 -log10(pVAL(0.08uM-TGFb/UT+DMSO))	BI1 LR(2uM-TGFb/UT+DMSO)	BI1 -log10(pVAL(2uM-TGFb/UT+DMSO))	BI1 LR(2uM-TGFb/0.08uM-TGFb)	BI1 -log10(pVAL(2uM-TGFb/0.08uM-TGFb))	BI1 LR(2uM+TGFb/0.08uM+TGFb)	BI1 -log10(pVAL(2uM+TGFb/0.08uM+TGFb))
ILMN_1676278	ABCC2	ATP-binding cassette, sub-family C (CFTR/MRP), member 2 (ABCC2), mRNA.	NM_000392.1	0.28	0.62	2.11	19.31	-0.18	0.44	1.58	24.97	1.76	26.18	1.84	15.41
ILMN_1677814	ABCC3	ATP-binding cassette, sub-family C (CFTR/MRP), member 3 (ABCC3), mRNA.	NM_003786.2	1.28	10.19	1.11	9.34	1.46	25.04	1.38	24.28	-0.08	0.09	-0.17	0.2
ILMN_2284941	ABCF2	ATP-binding cassette, sub-family F (GCN20), member 2 (ABCF2), nuclear gene encoding mitochondrial protein, transcript variant 2, mRNA.	NM_005692.3	0.05	0.03	2.04	12.85	0.07	0.09	1.5	20.94	1.43	17.41	1.99	11.25
ILMN_1666690	ACRC	acidic repeat containing (ACRC), mRNA.	NM_052957.3	-0.49	1.91	0.84	5.81	-0.25	0.59	1.44	17.22	1.69	19.54	1.33	10
ILMN_1708348	ADAM8	ADAM metallopeptidase domain 8 (ADAM8), mRNA.	NM_001109.3	0.62	1.13	1.43	6.18	0.78	5.78	1.19	13.27	0.41	1.48	0.81	1.84
ILMN_1811480	ADPRHL2	ADP-ribosylhydrolase like 2 (ADPRHL2), mRNA.	NM_017825.1	-0.02	0.01	1	8.57	0.1	0.13	1.12	10.54	1.02	7.76	1.02	7.7
ILMN_1714253	AGRP	agouti related protein homolog (mouse) (AGRP), transcript variant 2, mRNA.	NM_007316.1	0.29	0.82	3.41	29.98	0.13	0.33	3.2	64.34	3.07	58.03	3.11	26.48
ILMN_1747504	AHCTF1	AT hook containing transcription factor 1 (AHCTF1), mRNA.	NM_015446.3	0.48	0.36	1.63	4.71	0.41	0.58	1.25	5.59	0.84	2.15	1.15	2.06
ILMN_2162799	AHR	aryl hydrocarbon receptor (AHR), mRNA.	NM_001621.3	-0.34	0.77	0.8	4.81	-0.59	2.77	0.74	4.84	1.33	11.93	1.13	7.25
ILMN_1690252	ALKBH2	alkB, alkylation repair homolog 2 (E. coli) (ALKBH2), mRNA.	NM_001001655.1	1.04	5.04	1.86	12.84	0.82	6.48	1.18	13.38	0.36	1.16	0.82	3.22
ILMN_1766560	ANKHD1-EIF4EBP3	ANKHD1-EIF4EBP3 (ANKHD1-EIF4EBP3), mRNA.	NM_020690.4	0.59	1.58	1.17	6.26	0.32	0.74	1.24	10.63	0.91	5.29	0.58	1.41
ILMN_2108709	ANKRD11	ankyrin repeat domain 11 (ANKRD11), mRNA.	NM_013275.4	0.04	0.03	1.1	8.32	-0.26	0.8	1.22	16.58	1.47	19.76	1.06	6.88
ILMN_2148507	ANKRD13C	ankyrin repeat domain 13C (ANKRD13C), mRNA.	NM_030816.2	0.02	0.01	1.1	6.51	-0.32	0.76	1	7.67	1.32	10.85	1.08	5.42
ILMN_1813840	AOF2	amine oxidase (flavin containing) domain 2 (AOF2), transcript variant 2, mRNA.	NM_015013.2	0.55	3.59	1.18	12.5	0.26	1.29	1.01	17.86	0.75	9.62	0.63	4.3
ILMN_1740938	APOE	apolipoprotein E (APOE), mRNA.	NM_000041.2	0.05	0.03	1.09	8.36	0.03	0.04	1.05	13.16	1.02	10.92	1.04	6.82
ILMN_1726410	APRT	adenine phosphoribosyltransferase (APRT), transcript variant 1, mRNA.	NM_000485.2	0.75	4.3	1.01	7.72	0.77	6.6	1.04	12.25	0.27	0.72	0.26	0.44
ILMN_2408851	ARHGAP30	Rho GTPase activating protein 30 (ARHGAP30), transcript variant 2, mRNA.	NM_181720.2	0.88	3.32	2.42	15.95	0.5	1.57	2.28	25.96	1.78	16.09	1.54	8.13
ILMN_1750805	ARHGAP30	Rho GTPase activating protein 30 (ARHGAP30), transcript variant 1, mRNA.	NM_001025598.1	0.22	0.43	1.02	8.51	0.12	0.17	1.32	13.6	1.2	10.11	0.79	5
ILMN_1751164	ARHGAP30	Rho GTPase activating protein 30 (ARHGAP30), transcript variant 1, mRNA.	NM_001025598.1	0.4	0.69	1.27	7.13	0.11	0.17	1.4	16.67	1.29	12.82	0.87	3.22
ILMN_1696956	ARID3B	AT rich interactive domain 3B (BRIGHT-like) (ARID3B), mRNA.	NM_006465.2	0.38	0.45	1.54	7.31	0.06	0.09	1.28	17.29	1.22	14.12	1.15	3.91
ILMN_1694219	ARIH1	ariadne homolog, ubiquitin-conjugating enzyme E2 binding protein, 1 (Drosophila) (ARIH1), mRNA.	NM_005744.2	-0.69	3.77	0.42	1.81	-0.65	3.91	0.69	4.84	1.34	13.66	1.11	7.99
ILMN_2120022	ARL5B	ADP-ribosylation factor-like 5B (ARL5B), mRNA.	NM_178815.3	-0.66	2.18	0.91	4.59	-0.19	0.32	1.42	13.64	1.61	14.79	1.57	9.18
ILMN_2043816	ARPC5L	actin related protein 2/3 complex, subunit 5-like (ARPC5L), mRNA.	NM_030978.1	0.46	2.3	1.04	10.03	0.49	3.74	1.15	18.17	0.66	6.06	0.58	3.47
ILMN_2221673	ASNSD1	asparagine synthetase domain containing 1 (ASNSD1), mRNA.	NM_019048.1	-0.63	0.87	1.41	4.88	-0.28	0.35	0.91	3.56	1.18	5.04	2.04	7.52
ILMN_1708778	ASS1	argininosuccinate synthetase 1 (ASS1), transcript variant 1, mRNA.	NM_000050.4	0.57	0.86	1.22	4.43	0.85	6.76	1.09	11.52	0.25	0.48	0.65	1.04
ILMN_1748271	ATF2	activating transcription factor 2 (ATF2), mRNA.	NM_001880.2	0.28	0.26	1.53	7.69	-0.2	0.31	1.21	9.83	1.41	11.12	1.25	4.81
ILMN_1653599	ATP5D	ATP synthase, H+ transporting, mitochondrial F1 complex, delta subunit (ATP5D), nuclear gene encoding mitochondrial protein, transcript variant 1, mRNA.	NM_001687.4	0.73	3.16	1.25	8.61	1.07	12.12	1.31	18.19	0.25	0.6	0.52	1.56
ILMN_1659801	ATP6V1C1	ATPase, H+ transporting, lysosomal 42kDa, V1 subunit C1 (ATP6V1C1), mRNA.	NM_001695.4	1.02	6.49	1.4	11.32	0.94	8.57	1.74	24.76	0.8	6.04	0.39	1
ILMN_1778358	ATP8A1	ATPase, aminophospholipid transporter (APLT), Class I, type 8A, member 1 (ATP8A1), mRNA.	NM_006095.1	-0.21	0.25	0.86	4.69	0.19	0.4	1	10.33	0.82	6.15	1.07	5.73
ILMN_1682375	ATPBD3	ATP binding domain 3 (ATPBD3), mRNA.	NM_145232.2	0.05	0.03	1.01	4.33	-0.13	0.19	0.92	7.83	1.05	8.5	0.95	3.28
ILMN_2271627	ATXN2L	ataxin 2-like (ATXN2L), transcript variant A, mRNA.	NM_007245.2	0.31	0.27	1.42	6.07	0.09	0.11	1.34	14.5	1.26	11.38	1.11	3.4
ILMN_1720360	BAD	BCL2-antagonist of cell death (BAD), transcript variant 1, mRNA.	NM_004322.2	0.94	4.72	1.27	8.51	1.22	9.76	1.61	16.67	0.39	0.93	0.33	0.55
ILMN_1699727	BAIAP2	BAI1-associated protein 2 (BAIAP2), transcript variant 3, mRNA.	NM_006340.1	0.26	0.18	1.02	3.17	0.15	0.2	1.15	9.07	1	6.09	0.76	1.41
ILMN_1686626	BAT1	HLA-B associated transcript 1 (BAT1), transcript variant 2, mRNA.	NM_080598.4	1.03	7.86	1.35	12.46	1.55	14.21	1.82	19.57	0.27	0.39	0.32	0.84
ILMN_1737380	BCAP29	B-cell receptor-associated protein 29 (BCAP29), transcript variant 3, mRNA.	NM_001008406.1	0.57	2.01	1.09	7.24	0.92	6.18	1.54	16.28	0.62	2.66	0.53	1.63
ILMN_1672596	BCAR1	breast cancer anti-estrogen resistance 1 (BCAR1), mRNA.	NM_014567.2	0.1	0.05	1.17	5.34	0.47	1.38	1.29	10.66	0.82	4	1.08	3.91
ILMN_1766169	BCAT1	branched chain aminotransferase 1, cytosolic (BCAT1), mRNA.	NM_005504.4	1.54	4.72	0.67	1.16	1.21	4.61	0.85	2.64	-0.35	0.32	-0.88	1.55
ILMN_1654118	BCL2L1	BCL2-like 1 (BCL2L1), nuclear gene encoding mitochondrial protein, transcript variant 1, mRNA.	NM_138578.1	0.57	1.75	1.57	10.88	0.62	5.78	1.28	21.03	0.65	5.96	1.01	4.87
ILMN_1710514	BCL3	B-cell CLL/lymphoma 3 (BCL3), mRNA.	NM_005178.2	-0.16	0.1	1.12	4.71	0.3	0.99	1.19	15.18	0.89	8.16	1.27	4.99
ILMN_1743966	BCL9L	B-cell CLL/lymphoma 9-like (BCL9L), mRNA.	NM_182557.2	0.33	0.26	1.31	4.77	0.1	0.12	1.47	15.52	1.37	12.18	0.99	2.37
ILMN_1712608	BFSP1	beaded filament structural protein 1, filensin (BFSP1), mRNA.	NM_001195.2	1.24	5.74	1.37	7.52	0.77	4.53	1.04	8.62	0.27	0.44	0.13	0.07
ILMN_1715583	BOP1	block of proliferation 1 (BOP1), mRNA.	NM_015201.3	0.52	3.8	1.19	14.18	0.44	1.88	1.27	15.16	0.84	6.38	0.67	5.71
ILMN_2245676	BTF3	basic transcription factor 3 (BTF3), transcript variant 1, mRNA.	NM_001037637.1	0.61	2.25	1.06	6.81	0.08	0.1	1.1	11.43	1.03	8.79	0.45	1.17
ILMN_1679800	BXDC2	brix domain containing 2 (BXDC2), mRNA.	NM_018321.3	0.2	0.21	1.13	6.76	0.36	0.94	1.14	9.83	0.79	4.23	0.93	4.19
ILMN_1682792	BYSL	bystin-like (BYSL), mRNA.	NM_004053.3	0.54	3.45	1.31	14.2	1.14	12.11	2.08	31.72	0.94	8.21	0.77	6.12
ILMN_1799204	C10orf110	chromosome 10 open reading frame 110 (C10orf110), mRNA.	NM_018470.1	0.15	0.17	1.58	13.7	0.09	0.14	1.61	22.19	1.51	18.12	1.43	10.96
ILMN_1713402	C11orf56	chromosome 11 open reading frame 56 (C11orf56), transcript variant 2, mRNA.	NM_001098794.1	0.05	0.02	1.48	7.56	-0.34	1.16	1.13	12.43	1.47	16.85	1.43	6.2
ILMN_1772527	C12orf44	chromosome 12 open reading frame 44 (C12orf44), transcript variant 2, mRNA.	NM_001098673.1	0.43	1.42	1.14	8.99	0.07	0.13	1.03	13.98	0.96	10.78	0.71	3.63
ILMN_2042792	C13orf16	chromosome 13 open reading frame 16 (C13orf16), mRNA.	NM_152324.1	-0.29	0.79	1.23	11.24	-0.05	0.07	1.32	19.41	1.37	18.3	1.52	13.19
ILMN_1675577	C14orf172	chromosome 14 open reading frame 172 (C14orf172), mRNA.	NM_152307.2	0.5	0.75	1.05	3.78	0.75	5.2	1.07	10.8	0.32	0.83	0.54	0.81
ILMN_1686373	C15orf26	chromosome 15 open reading frame 26 (C15orf26), mRNA.	NM_173528.2	0.2	0.41	2.25	22.43	-0.07	0.1	1.92	32.6	1.99	31.07	2.05	19.12
ILMN_1793729	C15orf39	chromosome 15 open reading frame 39 (C15orf39), mRNA.	NM_015492.4	0.03	0.01	1.39	4.12	0.56	2.3	1.12	9.51	0.56	2.15	1.36	3.32
ILMN_1730523	C16orf14	chromosome 16 open reading frame 14 (C16orf14), mRNA.	NM_138418.2	0.09	0.05	1.16	5.8	1.08	9.45	1.8	22.97	0.72	4.16	1.07	4.3
ILMN_1773407	C16orf72	chromosome 16 open reading frame 72 (C16orf72), mRNA.	NM_014117.2	-0.36	0.27	0.7	1.29	-0.08	0.09	0.93	5.82	1.01	5.84	1.06	2.31
ILMN_1707292	C17orf67	chromosome 17 open reading frame 67 (C17orf67), mRNA.	NM_001085430.1	0.04	0.03	1.01	6.33	0.22	0.41	1.26	12.01	1.04	7.48	0.97	5.06
ILMN_1678052	C19orf24	chromosome 19 open reading frame 24 (C19orf24), mRNA.	NM_017914.2	0.85	5.64	1.39	12.55	0.98	7.91	1.55	18.2	0.56	2.53	0.54	2.45
ILMN_2089656	C1orf107	chromosome 1 open reading frame 107 (C1orf107), mRNA.	NM_014388.5	0.95	4.8	1.2	7.77	0.88	6.36	1.55	18.01	0.67	3.49	0.25	0.28
ILMN_2077886	C1orf109	chromosome 1 open reading frame 109 (C1orf109), mRNA.	NM_017850.1	0.11	0.1	1.1	7.95	-0.32	0.79	0.73	4.55	1.05	7.61	0.99	5.87
ILMN_1795893	C1orf119	chromosome 1 open reading frame 119 (C1orf119), mRNA.	NM_020141.3	-0.04	0.01	1.04	2.87	0.29	0.41	1.13	6.24	0.84	3	1.08	2.5
ILMN_1793632	C1orf160	chromosome 1 open reading frame 160 (C1orf160), mRNA.	NM_032125.2	0.11	0.08	1.13	6.18	0.1	0.15	1.19	12.87	1.09	9.63	1.02	4.43
ILMN_1754894	C1orf162	chromosome 1 open reading frame 162 (C1orf162), mRNA.	NM_174896.2	0.26	0.52	2.34	20.58	-0.1	0.17	2.14	32.98	2.24	32.02	2.08	17.01
ILMN_1757415	C1orf163	chromosome 1 open reading frame 163 (C1orf163), mRNA.	NM_023077.1	0.85	1.54	1.29	3.97	0.54	1.3	1.06	5.62	0.52	1.12	0.44	0.33
ILMN_1793543	C1orf51	chromosome 1 open reading frame 51 (C1orf51), mRNA.	NM_144697.2	-0.01	0	1.06	4.16	0.2	0.45	1.35	17.59	1.15	11.98	1.07	3.55
ILMN_1786470	C1orf74	chromosome 1 open reading frame 74 (C1orf74), mRNA.	NM_152485.2	1.91	17.6	2.53	24.09	0.87	8.52	3.02	52.02	2.14	32.55	0.62	3.47
ILMN_1736234	C1orf77	chromosome 1 open reading frame 77 (C1orf77), mRNA.	NM_015607.2	0.28	0.71	1.1	9.51	0.16	0.29	1.01	9.76	0.85	6.17	0.81	5.24
ILMN_1781626	C1S	complement component 1, s subcomponent (C1S), transcript variant 1, mRNA.	NM_001734.2	0.26	0.46	1.08	7.76	0.08	0.15	1.43	24.94	1.35	20.62	0.82	4.26
ILMN_2198270	C20orf106	chromosome 20 open reading frame 106 (C20orf106), mRNA.	NM_001012971.2	-0.13	0.14	0.88	6.1	0.14	0.26	1.35	17.23	1.21	12.67	1.01	6.54
ILMN_1721225	C20orf4	chromosome 20 open reading frame 4 (C20orf4), mRNA.	NM_015511.3	0.2	0.39	1.24	12.05	-0.43	2.58	0.62	5.74	1.05	12.72	1.04	8.49
ILMN_2104924	C21orf70	chromosome 21 open reading frame 70 (C21orf70), mRNA.	NM_058190.2	0.52	1.61	1.43	10.21	1.02	9.31	1.75	23.63	0.73	4.68	0.91	4.45
ILMN_1759595	C22orf29	chromosome 22 open reading frame 29 (C22orf29), mRNA.	NM_024627.5	0.5	1.66	1.31	9.85	-0.14	0.23	0.91	7.62	1.05	8.55	0.81	4.07
ILMN_1700967	C3orf59	chromosome 3 open reading frame 59 (C3orf59), mRNA.	NM_178496.2	-0.48	1.41	0.72	3.64	0.3	0.78	1.22	12.8	0.93	6.84	1.2	7.18
ILMN_1659524	C6orf66	chromosome 6 open reading frame 66 (C6orf66), mRNA.	NM_014165.1	0.08	0.03	1.08	3.55	0.66	1.14	1.4	5.57	0.74	1.27	1.01	2.55
ILMN_1741475	C7orf47	chromosome 7 open reading frame 47 (C7orf47), mRNA.	NM_145030.1	0.16	0.21	1.11	9.05	0.5	4.28	1.35	25	0.85	10.72	0.95	6.24
ILMN_1804895	C7orf53	chromosome 7 open reading frame 53 (C7orf53), mRNA.	NM_182597.1	0.29	0.36	2.92	19.22	-0.42	1.01	2.31	24.82	2.73	28.21	2.63	15.93
ILMN_1781745	C9orf152	chromosome 9 open reading frame 152 (C9orf152), mRNA.	NM_001012993.1	0.23	0.47	4.62	35.82	0.31	0.72	3.42	46.8	3.11	38.87	4.38	33.03
ILMN_1724306	CACNG1	calcium channel, voltage-dependent, gamma subunit 1 (CACNG1), mRNA.	NM_000727.2	0.11	0.1	1.84	15.36	0	0.01	1.56	23.97	1.55	21.42	1.73	13.03
ILMN_1810992	CAD	carbamoyl-phosphate synthetase 2, aspartate transcarbamylase, and dihydroorotase (CAD), mRNA.	NM_004341.3	1.28	4.8	1.65	7.98	1.41	12.89	1.69	18.43	0.28	0.46	0.36	0.34
ILMN_1757210	CALML4	calmodulin-like 4 (CALML4), transcript variant 1, mRNA.	NM_001031733.1	0.41	0.93	2.05	15.25	0.51	3.21	1.62	25.39	1.11	12.59	1.64	10.55
ILMN_1762825	CANX	calnexin (CANX), transcript variant 1, mRNA.	NM_001746.3	-0.06	0.03	0.99	4.16	0.41	1.32	1.37	14.1	0.95	6.57	1.05	3.86
ILMN_2401057	CANX	calnexin (CANX), transcript variant 2, mRNA.	NM_001024649.1	-0.05	0.04	1.21	10.24	-0.3	1.22	0.92	11.45	1.23	16.03	1.26	9.65
ILMN_2101034	CAPN12	calpain 12 (CAPN12), mRNA.	NM_144691.3	1.1	6.07	1.59	11.34	0.87	5.39	1.81	20.47	0.94	5.94	0.49	1.27
ILMN_1787514	CAPN12	calpain 12 (CAPN12), mRNA.	NM_144691.3	0.72	3.3	1.19	8.42	0.51	2.66	1.32	16.68	0.82	6.34	0.47	1.34
ILMN_1687583	CAV1	caveolin 1, caveolae protein, 22kDa (CAV1), mRNA.	NM_001753.3	1.17	7.85	0.65	3.42	1.03	3.38	0.64	1.54	-0.38	0.37	-0.52	1.83
ILMN_1716080	CBL	Cas-Br-M (murine) ecotropic retroviral transforming sequence (CBL), mRNA.	NM_005188.2	-0.29	0.53	0.84	5.09	-0.1	0.13	0.91	7.88	1	8.15	1.12	6.98
ILMN_1705433	CBLL1	Cas-Br-M (murine) ecotropic retroviral transforming sequence-like 1 (CBLL1), mRNA.	NM_024814.1	-0.17	0.16	1.06	6.36	0.02	0.02	1.13	8.75	1.11	7.34	1.23	6.91
ILMN_2150352	CBWD5	COBW domain containing 5 (CBWD5), mRNA.	NM_001024916.2	-0.4	0.57	1.03	4.38	-0.06	0.05	1.12	7.29	1.18	6.92	1.43	6.38
ILMN_1813028	CBX5	chromobox homolog 5 (HP1 alpha homolog, Drosophila) (CBX5), mRNA.	NM_012117.1	1.05	0.95	1.64	2.75	1.05	4.97	1.25	7.54	0.2	0.15	0.58	0.24
ILMN_1743506	CCDC137	coiled-coil domain containing 137 (CCDC137), mRNA.	NM_199287.2	0.07	0.03	1.35	6.58	-0.41	0.92	0.6	2.19	1.01	5.09	1.28	5.19
ILMN_1790555	CCDC146	coiled-coil domain containing 146 (CCDC146), mRNA.	NM_020879.2	0.68	3.27	1.39	11.14	0.33	0.63	1.06	6.81	0.73	2.83	0.71	3.39
ILMN_1787441	CCDC17	coiled-coil domain containing 17 (CCDC17), mRNA.	NM_152500.1	0.2	0.21	1.99	14.5	-0.13	0.28	2.19	40.8	2.32	39.99	1.8	11.61
ILMN_1663370	CCDC62	coiled-coil domain containing 62 (CCDC62), transcript variant 2, mRNA.	NM_201435.2	-0.17	0.16	2.4	17.92	-0.12	0.18	2.34	32.33	2.46	31.5	2.57	17.72
ILMN_1701905	CCDC62	coiled-coil domain containing 62 (CCDC62), transcript variant 1, mRNA.	NM_032573.3	-0.26	0.58	1.58	14.64	0.38	1.76	1.66	26.38	1.28	16.05	1.85	15.81
ILMN_1792681	CCDC86	coiled-coil domain containing 86 (CCDC86), mRNA.	NM_024098.1	0.39	1.6	1.39	13.86	0.93	8.25	1.89	27.36	0.96	8.29	1	8.03
ILMN_1667081	CCND2	cyclin D2 (CCND2), mRNA.	NM_001759.2	0.9	4.66	2.09	16.33	0.59	1.56	1.72	13.08	1.13	5.39	1.19	7.13
ILMN_2067656	CCND2	cyclin D2 (CCND2), mRNA.	NM_001759.2	0.8	5.26	1.7	16.05	0.33	0.91	1.13	10.98	0.81	5.11	0.9	6.2
ILMN_2357682	CCNT2	cyclin T2 (CCNT2), transcript variant a, mRNA.	NM_001241.2	0.03	0.02	1.39	9.5	-0.29	0.86	0.96	9.81	1.25	13.34	1.36	8.11
ILMN_1689378	CCRN4L	CCR4 carbon catabolite repression 4-like (S. cerevisiae) (CCRN4L), mRNA.	NM_012118.2	0.58	1.31	1.26	6.41	0.25	0.43	2.03	22.12	1.78	16.17	0.69	1.78
ILMN_2377669	CD247	CD247 molecule (CD247), transcript variant 1, mRNA.	NM_198053.1	-0.05	0.04	2.36	20.53	0.02	0.02	2.86	54.2	2.85	49.88	2.41	19.46
ILMN_1676924	CD247	CD247 molecule (CD247), transcript variant 2, mRNA.	NM_000734.2	0.01	0	2.4	22.73	0.18	0.49	2.8	52	2.62	44.78	2.39	21.16
ILMN_2115633	CD320	CD320 molecule (CD320), mRNA.	NM_016579.2	0.77	3.21	1.7	12.11	1.2	10.18	1.63	18.2	0.43	1.3	0.93	4.32
ILMN_1760247	CD70	CD70 molecule (CD70), mRNA.	NM_001252.3	0.42	0.82	2.23	15.21	0.77	3.95	1.48	14.03	0.71	3.16	1.81	10.71
ILMN_1661363	CDC14B	CDC14 cell division cycle 14 homolog B (S. cerevisiae) (CDC14B), transcript variant 3, mRNA.	NM_033332.1	0.67	1.6	1.18	5.23	-0.38	0.85	0.84	4.57	1.23	7.82	0.51	0.81
ILMN_1711005	CDC25A	cell division cycle 25 homolog A (S. pombe) (CDC25A), transcript variant 1, mRNA.	NM_001789.2	0.39	0.88	1.07	6.9	1.12	5.43	0.18	0.23	-0.94	3.62	0.69	2.72
ILMN_1735594	CDC42SE2	CDC42 small effector 2 (CDC42SE2), transcript variant 1, mRNA.	NM_020240.2	0.02	0.01	1.38	8.4	-0.17	0.24	0.95	6.51	1.12	7.51	1.36	7.22
ILMN_2341611	CDCP1	CUB domain containing protein 1 (CDCP1), transcript variant 2, mRNA.	NM_178181.1	1.11	1.39	2.14	5.44	-0.47	0.73	0.62	1.45	1.09	3.61	1.03	1.1
ILMN_1730928	CDK5R1	cyclin-dependent kinase 5, regulatory subunit 1 (p35) (CDK5R1), mRNA.	NM_003885.2	0.49	0.91	1.85	10.74	-0.5	2.22	1.36	15.59	1.86	22.35	1.36	6.01
ILMN_1747556	CDK9	cyclin-dependent kinase 9 (CDC2-related kinase) (CDK9), mRNA.	NM_001261.2	0.74	3.36	1.38	10.11	0.27	0.74	1.16	13.08	0.89	7.18	0.64	2.47
ILMN_1748883	CDKN2D	cyclin-dependent kinase inhibitor 2D (p19, inhibits CDK4) (CDKN2D), transcript variant 2, mRNA.	NM_079421.2	-0.65	2.93	0.4	1.38	-1.03	9.51	0.19	0.46	1.22	12.05	1.06	6.45
ILMN_1754658	CDRT1	CMT1A duplicated region transcript 1 (CDRT1), mRNA.	NM_006382.2	-0.03	0.02	1.53	12.12	-0.49	2.13	0.85	6.91	1.34	13.27	1.56	11.15
ILMN_2297315	CDRT1	CMT1A duplicated region transcript 1 (CDRT1), mRNA.	NM_006382.1	0.45	1.16	3.45	25.13	-0.13	0.25	3.33	55.4	3.46	53.37	3	20.87
ILMN_1712522	CEACAM6	carcinoembryonic antigen-related cell adhesion molecule 6 (non-specific cross reacting antigen) (CEACAM6), mRNA.	NM_002483.3	1.22	4.49	1.78	9.07	1	6.07	1.2	9.19	0.2	0.19	0.56	0.93
ILMN_2269136	CENTG3	centaurin, gamma 3 (CENTG3), transcript variant 2, mRNA.	NM_001042535.1	0.28	0.9	1.58	17.08	0.14	0.27	1.68	24.17	1.54	18.95	1.3	12.53
ILMN_1813938	CHCHD4	coiled-coil-helix-coiled-coil-helix domain containing 4 (CHCHD4), nuclear gene encoding mitochondrial protein, transcript variant 2, mRNA.	NM_144636.2	0.33	0.98	1.49	13.91	0.26	0.64	1.28	14.17	1.02	8.37	1.16	9.03
ILMN_1798083	CHERP	calcium homeostasis endoplasmic reticulum protein (CHERP), mRNA.	NM_006387.5	-0.03	0.01	1.09	4.69	0.47	1.96	1.48	17.76	1.01	8.22	1.12	4.15
ILMN_1659054	CHKB	choline kinase beta (CHKB), transcript variant 1, mRNA.	NM_005198.3	0.22	0.19	1.32	6.77	0.03	0.03	1.07	9.97	1.04	8.2	1.1	4.31
ILMN_1796235	CIRH1A	cirrhosis, autosomal recessive 1A (cirhin) (CIRH1A), mRNA.	NM_032830.1	0.47	1.98	1.26	11.36	0.66	6.29	1.24	19.6	0.57	4.52	0.79	5.02
ILMN_1709204	CLEC4A	C-type lectin domain family 4, member A (CLEC4A), transcript variant 3, mRNA.	NM_194447.2	0.08	0.06	1.43	10.64	-0.12	0.22	1.05	12.14	1.17	12.8	1.35	8.73
ILMN_2399363	CLEC4A	C-type lectin domain family 4, member A (CLEC4A), transcript variant 4, mRNA.	NM_194448.1	0.11	0.09	1.89	13.91	-0.14	0.28	1.67	25.82	1.8	26.03	1.78	11.67
ILMN_1695961	CLK3	CDC-like kinase 3 (CLK3), transcript variant phclk3, mRNA.	NM_003992.2	0.6	3.26	1.39	12.89	-0.27	0.63	0.86	6.61	1.13	9.3	0.79	5.02
ILMN_1805765	CMYA5	cardiomyopathy associated 5 (CMYA5), mRNA.	NM_153610.3	0.14	0.1	1.73	11.25	0	0	2	28.87	2	26.1	1.59	8.97
ILMN_1770290	CNN2	calponin 2 (CNN2), transcript variant 2, mRNA.	NM_201277.1	0.55	3.01	1.04	9.35	0.47	2.92	1.13	15.58	0.66	5.23	0.48	2.21
ILMN_2071186	CORT	cortistatin (CORT), mRNA.	NM_001302.3	-0.11	0.11	0.97	6.97	0.01	0.01	1.25	13.89	1.24	12.05	1.08	7.15
ILMN_1755954	CPEB3	cytoplasmic polyadenylation element binding protein 3 (CPEB3), mRNA.	NM_014912.3	-0.1	0.04	1.47	4.93	-0.15	0.18	0.94	5.73	1.09	6.42	1.58	4.68
ILMN_1739956	CRSP2	PREDICTED: cofactor required for Sp1 transcriptional activation, subunit 2, 150kDa, transcript variant 6 (CRSP2), mRNA.	XM_942919.1	-0.07	0.08	1.13	12.07	-0.06	0.09	1.21	16.74	1.27	16	1.2	11.74
ILMN_1796180	CRY2	cryptochrome 2 (photolyase-like) (CRY2), mRNA.	NM_021117.2	-0.31	0.82	1.45	13.37	-0.14	0.26	1.68	22.78	1.82	23.04	1.75	15.14
ILMN_1792597	CRYGS	crystallin, gamma S (CRYGS), mRNA.	NM_017541.2	0.58	1.86	1.92	14	0.42	1.18	1.49	14.49	1.07	7.16	1.34	7.81
ILMN_1723843	CSNK2A2	casein kinase 2, alpha prime polypeptide (CSNK2A2), mRNA.	NM_001896.2	-0.38	1.08	0.97	7.11	-0.55	2.91	0.8	6.6	1.35	14.26	1.34	10
ILMN_2366998	CTF8	chromosome transmission fidelity factor 8 homolog (S. cerevisiae) (CTF8), transcript variant 2, mRNA.	NM_001040144.1	0.43	0.9	2.74	19.46	-0.13	0.16	1.77	17.2	1.9	17.03	2.32	15.08
ILMN_1748730	CTRC	chymotrypsin C (caldecrin) (CTRC), mRNA.	NM_007272.2	-0.03	0.02	1.02	6.97	0.02	0.02	1.32	19.29	1.3	16.79	1.05	6.3
ILMN_1697864	CXorf38	chromosome X open reading frame 38 (CXorf38), mRNA.	NM_144970.1	0.76	1.97	1.81	9.58	0.41	1.43	1.44	16.17	1.02	7.97	1.05	3.46
ILMN_2378376	CYB561	cytochrome b-561 (CYB561), transcript variant 3, mRNA.	NM_001017917.1	0.76	3.61	1.31	9.63	0.31	1.03	1.07	12.11	0.76	5.7	0.55	1.9
ILMN_1807291	CYP1A1	cytochrome P450, family 1, subfamily A, polypeptide 1 (CYP1A1), mRNA.	NM_000499.2	0.49	1.18	2.32	16.19	-0.62	1.4	1.11	5.04	1.73	9.67	1.83	11.14
ILMN_1769155	CYP2C8	cytochrome P450, family 2, subfamily C, polypeptide 8 (CYP2C8), mRNA.	NM_000770.3	0.09	0.05	1.14	6.05	0.29	0.52	1.34	10.63	1.05	5.94	1.05	4.54
ILMN_1665437	CYP2E1	cytochrome P450, family 2, subfamily E, polypeptide 1 (CYP2E1), mRNA.	NM_000773.3	-0.15	0.23	1.13	10.66	-0.07	0.15	0.95	15.7	1.03	15.57	1.28	11.21
ILMN_1792710	DAPK3	death-associated protein kinase 3 (DAPK3), mRNA.	NM_001348.1	0.3	0.24	1.26	4.78	0.11	0.1	1.3	8.58	1.19	6.31	0.96	2.45
ILMN_1708077	DAXX	death-associated protein 6 (DAXX), mRNA.	NM_001350.3	0.71	2.19	1.55	9.25	0.3	0.75	1.47	16.27	1.17	9.75	0.84	2.93
ILMN_1735461	DDX21	DEAD (Asp-Glu-Ala-Asp) box polypeptide 21 (DDX21), mRNA.	NM_004728.2	0.36	0.23	1.13	2.66	1.1	3.75	1.9	11.34	0.81	1.88	0.76	0.94
ILMN_1784218	DDX23	DEAD (Asp-Glu-Ala-Asp) box polypeptide 23 (DDX23), mRNA.	NM_004818.2	0.51	2.76	1.17	11.34	0.36	2.47	1.13	20.63	0.76	9.7	0.65	4.11
ILMN_1781721	DDX31	DEAD (Asp-Glu-Ala-Asp) box polypeptide 31 (DDX31), transcript variant 1, mRNA.	NM_022779.7	0.32	0.96	1.27	12.13	0.03	0.04	1.55	23.94	1.52	20.89	0.96	7.26
ILMN_1676864	DDX31	DEAD (Asp-Glu-Ala-Asp) box polypeptide 31 (DDX31), transcript variant 2, mRNA.	NM_138620.1	0.6	2.47	1.28	9.78	0.22	0.39	1.13	9.64	0.92	5.67	0.69	3.08
ILMN_1679405	DDX56	DEAD (Asp-Glu-Ala-Asp) box polypeptide 56 (DDX56), mRNA.	NM_019082.2	0.44	1.28	1.12	7.79	0.51	3.41	1.05	13.97	0.54	3.64	0.67	2.85
ILMN_1727315	DENND1A	DENN/MADD domain containing 1A (DENND1A), transcript variant 2, mRNA.	NM_024820.2	0.8	6.15	1.7	17.7	0.35	1.89	1.57	28.96	1.22	18.17	0.9	7.19
ILMN_1728073	DENND1A	DENN/MADD domain containing 1A (DENND1A), transcript variant 1, mRNA.	NM_020946.1	0.64	2.36	1.34	9.03	0.27	0.52	1.21	9.94	0.94	5.41	0.69	2.59
ILMN_1751289	DERPC	decreased expression in renal and prostate (DERPC), mRNA.	NM_017804.3	0.48	1.59	3.05	24.29	-0.18	0.31	1.64	18.67	1.82	19.51	2.57	19.46
ILMN_2192683	DHX37	DEAH (Asp-Glu-Ala-His) box polypeptide 37 (DHX37), mRNA.	NM_032656.2	0.61	3.27	1.39	12.71	0.27	0.96	1.29	19.06	1.01	11.46	0.78	4.83
ILMN_1772692	DICER1	Dicer1, Dcr-1 homolog (Drosophila) (DICER1), transcript variant 2, mRNA.	NM_030621.2	0.59	1.79	1.25	7.57	0.32	0.87	1.1	10.42	0.78	4.81	0.66	2.09
ILMN_1763605	DIDO1	death inducer-obliterator 1 (DIDO1), transcript variant 3, mRNA.	NM_080797.2	-0.41	1.01	0.63	2.92	-0.36	1.07	1.08	9.88	1.45	14.06	1.04	5.77
ILMN_1799796	DIS3	DIS3 mitotic control homolog (S. cerevisiae) (DIS3), mRNA.	NM_014953.2	0.19	0.1	1.26	4.33	0.35	0.69	1.39	10.99	1.05	5.7	1.08	2.7
ILMN_1658356	DKFZP586H2123	regeneration associated muscle protease (DKFZP586H2123), transcript variant 1, mRNA.	NM_015430.2	0.3	0.7	3.34	27.72	0.13	0.25	2.59	46.45	2.46	40.5	3.05	24.4
ILMN_1669972	DKFZp686O24166	hypothetical protein DKFZp686O24166 (DKFZp686O24166), mRNA.	NM_001009913.1	0.97	4.56	1.63	11.1	0.72	1.92	1.13	5.35	0.42	0.55	0.67	2.2
ILMN_1757872	DKFZp761P0423	PREDICTED: hypothetical protein DKFZp761P0423 (DKFZp761P0423), mRNA.	XM_291277.4	0.63	2.1	1.4	9.16	0.16	0.32	1.06	11.14	0.89	7.17	0.77	2.96
ILMN_1810267	DNHD1	dynein heavy chain domain 1 (DNHD1), mRNA.	NM_144666.1	0.44	0.77	1.95	12.04	0.56	2.6	2.11	27.84	1.54	15.77	1.51	7.56
ILMN_2112915	DRD4	dopamine receptor D4 (DRD4), mRNA.	NM_000797.2	0.47	1.06	2.19	15.3	0.8	5.95	2.73	41.96	1.94	24.74	1.73	10.37
ILMN_1743194	EEA1	early endosome antigen 1, 162kD (EEA1), mRNA.	NM_003566.2	-0.32	0.5	1.23	7.56	-0.04	0.04	1.13	9.61	1.17	8.87	1.54	9.22
ILMN_1728858	EGFR	epidermal growth factor receptor (erythroblastic leukemia viral (v-erb-b) oncogene homolog, avian) (EGFR), transcript variant 4, mRNA.	NM_201284.1	1.62	11.73	2.46	20.02	0.46	1.65	2.85	39.59	2.39	29.09	0.85	4.35
ILMN_1651832	EHD1	EH-domain containing 1 (EHD1), mRNA.	NM_006795.2	0.27	0.83	1.4	15.03	-0.22	0.7	0.8	8.99	1.02	12	1.13	10.48
ILMN_1704472	EID2	EP300 interacting inhibitor of differentiation 2 (EID2), mRNA.	NM_153232.3	1.2	6	1.77	11.52	0.31	0.29	1.1	3.3	0.79	1.36	0.57	1.42
ILMN_1713380	EIF2B2	eukaryotic translation initiation factor 2B, subunit 2 beta, 39kDa (EIF2B2), mRNA.	NM_014239.2	0.22	0.74	1.37	17.11	0.09	0.15	1.16	16.58	1.07	12.89	1.15	12.87
ILMN_1739821	EIF2S1	eukaryotic translation initiation factor 2, subunit 1 alpha, 35kDa (EIF2S1), mRNA.	NM_004094.4	-0.34	0.82	1.19	9.33	0.4	1.73	1.57	22.19	1.17	12.37	1.52	11.55
ILMN_2278729	EIF3B	eukaryotic translation initiation factor 3, subunit B (EIF3B), transcript variant 2, mRNA.	NM_001037283.1	0.72	1.78	1.25	5.6	0.46	1.89	1.07	10.33	0.61	3.06	0.53	0.87
ILMN_2197225	EIF4EBP3	eukaryotic translation initiation factor 4E binding protein 3 (EIF4EBP3), mRNA.	NM_003732.2	0.36	0.75	1.1	7.06	0.43	1.88	1.14	13.01	0.71	4.84	0.74	3.05
ILMN_1795266	EMILIN3	elastin microfibril interfacer 3 (EMILIN3), mRNA.	NM_052846.1	0.1	0.11	1.1	9.51	-0.03	0.04	1.02	10.01	1.06	9.21	1	7.27
ILMN_1716552	ENAH	enabled homolog (Drosophila) (ENAH), transcript variant 2, mRNA.	NM_018212.4	1.08	6.94	1.42	11.24	0.87	7.36	1.25	14.83	0.38	1.31	0.34	0.71
ILMN_1770245	EPB41L5	erythrocyte membrane protein band 4.1 like 5 (EPB41L5), mRNA.	NM_020909.2	-0.17	0.24	1.29	11.33	-0.42	1.54	1.32	14.81	1.74	20.12	1.46	11.86
ILMN_2043306	EPB41L5	erythrocyte membrane protein band 4.1 like 5 (EPB41L5), mRNA.	NM_020909.2	0.08	0.06	1.1	7.56	0.11	0.15	1.35	13.97	1.24	10.6	1.02	5.8
ILMN_1699354	EPHA2	EPH receptor A2 (EPHA2), mRNA.	NM_004431.2	1.04	2.3	2.23	9.34	0.65	3.19	1.79	20.53	1.14	8.56	1.2	2.9
ILMN_2316778	ETNK1	ethanolamine kinase 1 (ETNK1), transcript variant 2, mRNA.	NM_001039481.1	-0.17	0.15	1.37	8.59	-0.19	0.38	1.6	20.45	1.79	21.61	1.53	8.93
ILMN_1745583	EXOC1	exocyst complex component 1 (EXOC1), transcript variant 3, mRNA.	NM_001024924.1	0	0	2.03	9.62	-1.04	6.96	0.6	2.69	1.64	14.47	2.04	8.52
ILMN_1745271	EXOSC4	exosome component 4 (EXOSC4), mRNA.	NM_019037.2	0.33	0.52	1.19	6.86	0.8	5.02	1.53	17.03	0.73	4	0.86	3.37
ILMN_1659725	EXOSC5	exosome component 5 (EXOSC5), mRNA.	NM_020158.3	1.07	5.3	0.52	1.66	1.44	19.3	0.5	3.22	-0.94	9.04	-0.55	1.45
ILMN_1679641	FAM120B	family with sequence similarity 120B (FAM120B), mRNA.	NM_032448.1	0.12	0.17	1.32	13.49	-0.32	1.47	0.74	8.44	1.06	13.57	1.2	10.78
ILMN_1779486	FAM126B	family with sequence similarity 126, member B (FAM126B), mRNA.	NM_173822.2	0.13	0.06	1.39	5.49	-0.14	0.13	0.99	4.84	1.13	5.23	1.26	3.94
ILMN_1662949	FAM132A	family with sequence similarity 132, member A (FAM132A), mRNA.	NM_001014980.1	0.65	3.16	1.1	8.42	0.2	0.58	1.66	29.18	1.47	22.08	0.45	1.45
ILMN_2184884	FAM154B	family with sequence similarity 154, member B (FAM154B), mRNA.	NM_001008226.1	-0.37	0.64	0.99	5.09	0.07	0.06	1.29	10.62	1.22	8.41	1.36	7.24
ILMN_2191313	FAM21A	family with sequence similarity 21, member A (FAM21A), mRNA.	NM_001005751.1	0.43	1	1.13	7.01	0.14	0.2	1.08	9.27	0.94	6.23	0.7	2.62
ILMN_1776905	FAM23B	family with sequence similarity 23, member B (FAM23B), mRNA.	NM_001013629.1	-0.3	0.71	0.71	4.6	0.18	0.32	1.09	9.85	0.9	6.12	1.01	6.92
ILMN_1782863	FAM83B	family with sequence similarity 83, member B (FAM83B), mRNA.	NM_001010872.1	-0.32	0.44	1.3	7.22	-0.39	1.54	1.4	17.89	1.79	23.08	1.62	8.73
ILMN_1780298	FAM86A	family with sequence similarity 86, member A (FAM86A), transcript variant 2, mRNA.	NM_201598.1	0.07	0.05	1.23	9.98	1.26	9.05	2.11	22.44	0.85	4.13	1.16	8.16
ILMN_2400250	FAM86A	family with sequence similarity 86, member A (FAM86A), transcript variant 2, mRNA.	NM_201598.1	0.95	4.31	2	13.85	0.77	3.77	1.77	17.87	1	5.82	1.05	4.86
ILMN_1655051	FAM86B1	family with sequence similarity 86, member B1 (FAM86B1), transcript variant 1, mRNA.	NM_001083537.1	0.79	2.3	1.99	11.43	0.42	1.61	1.6	20.5	1.18	11.16	1.2	4.7
ILMN_1658861	FAM86B1	family with sequence similarity 86, member B1 (FAM86B1), transcript variant 1, mRNA.	NM_001083537.1	0.06	0.03	1.58	10.27	0.18	0.35	1.39	16.32	1.21	11.39	1.52	8.64
ILMN_1777322	FAM91A1	family with sequence similarity 91, member A1 (FAM91A1), mRNA.	NM_144963.2	-0.83	5.35	0.56	3.15	-0.57	3.87	1.26	17	1.83	26.48	1.39	11.17
ILMN_1778255	FARSA	phenylalanyl-tRNA synthetase, alpha subunit (FARSA), mRNA.	NM_004461.2	0.38	0.56	1.08	5.05	0.83	4.92	1.51	15.62	0.69	3.25	0.7	1.88
ILMN_2353143	FBLIM1	filamin binding LIM protein 1 (FBLIM1), transcript variant 2, mRNA.	NM_001024215.1	0.73	3.18	1.61	12.02	-0.34	1.3	0.85	8.49	1.19	13.2	0.88	4.27
ILMN_1691249	FBLIM1	filamin binding LIM protein 1 (FBLIM1), transcript variant 3, mRNA.	NM_001024216.1	0.53	1.58	1.16	7.34	-0.51	1.92	0.6	3.01	1.12	8.15	0.63	2.15
ILMN_2352216	FBXL6	F-box and leucine-rich repeat protein 6 (FBXL6), transcript variant 2, mRNA.	NM_024555.3	0.43	0.52	1.41	6.07	0.49	2.39	1.09	11.83	0.6	3.38	0.99	2.74
ILMN_1727393	FBXW10	F-box and WD repeat domain containing 10 (FBXW10), mRNA.	NM_031456.3	0.3	0.32	1.91	11.2	0.08	0.11	1.57	20.69	1.49	17.01	1.62	7.87
ILMN_1668634	FBXW7	F-box and WD repeat domain containing 7 (FBXW7), transcript variant 1, mRNA.	NM_033632.2	0.2	0.12	1.17	4.16	0.03	0.02	1.26	7.76	1.23	6.37	0.97	2.46
ILMN_1744239	FEM1B	fem-1 homolog b (C. elegans) (FEM1B), mRNA.	NM_015322.3	-0.16	0.17	1.42	10.47	-0.11	0.16	1.11	11.46	1.22	11.71	1.59	10.81
ILMN_1779071	FEZ1	fasciculation and elongation protein zeta 1 (zygin I) (FEZ1), transcript variant 1, mRNA.	NM_005103.3	0.13	0.16	1.63	14.56	0.23	0.58	1.59	21.53	1.35	14.95	1.49	11.92
ILMN_1746465	FJX1	four jointed box 1 (Drosophila) (FJX1), mRNA.	NM_014344.2	0.54	2.83	1.24	11.73	0.61	2.61	1.73	18.9	1.13	8.09	0.7	4.38
ILMN_1763745	FLJ14166	hypothetical protein FLJ14166 (FLJ14166), mRNA.	NM_024565.4	0.01	0	1.41	11.92	-0.58	3.39	1.1	11.86	1.68	20.68	1.4	10.64
ILMN_1736995	FLJ32549	hypothetical protein FLJ32549 (FLJ32549), mRNA.	NM_152440.4	0.36	0.63	1.34	8.29	0.24	0.59	1.16	13.33	0.92	7.83	0.98	4.33
ILMN_1795300	FLJ41603	FLJ41603 protein (FLJ41603), mRNA.	NM_001001669.2	0.45	1.75	1.1	9.12	1.05	14.64	1.43	24.78	0.37	1.98	0.64	3.33
ILMN_1810159	FLJ90650	laeverin (FLJ90650), mRNA.	NM_173800.3	-0.16	0.29	1.04	10.89	0.25	1.17	1.58	32.08	1.33	22.85	1.2	11.66
ILMN_1664922	FLNB	filamin B, beta (actin binding protein 278) (FLNB), mRNA.	NM_001457.1	1.02	7.55	1.36	12.21	0.43	1.09	1.17	8.48	0.74	3.03	0.33	0.88
ILMN_1771841	FOSL1	FOS-like antigen 1 (FOSL1), mRNA.	NM_005438.2	0.94	1.46	1.61	4.7	1.04	3.6	1.91	12.11	0.87	2.4	0.67	0.66
ILMN_1736510	FOXN2	forkhead box N2 (FOXN2), mRNA.	NM_002158.3	0.26	0.23	1.09	4.67	0.22	0.32	1.57	12.94	1.35	8.66	0.84	2.38
ILMN_1665964	GAB2	GRB2-associated binding protein 2 (GAB2), transcript variant 1, mRNA.	NM_080491.1	0.36	0.9	1.32	10.52	0.41	1.62	1.44	17.86	1.03	8.92	0.96	5.81
ILMN_1694075	GADD45A	growth arrest and DNA-damage-inducible, alpha (GADD45A), mRNA.	NM_001924.2	0.45	0.43	1.05	2.88	-0.32	0.86	0.83	6.35	1.15	9.77	0.6	0.71
ILMN_1731268	GAK	PREDICTED: cyclin G associated kinase, transcript variant 2 (GAK), mRNA.	XM_938227.1	0.27	0.42	1.46	10.85	0.38	1.45	1.28	15.87	0.91	7.69	1.2	7.23
ILMN_1658575	GALNT5	UDP-N-acetyl-alpha-D-galactosamine:polypeptide N-acetylgalactosaminyltransferase 5 (GalNAc-T5) (GALNT5), mRNA.	NM_014568.1	-0.01	0.01	1.43	12.67	-0.21	0.53	1.2	14.97	1.41	17.16	1.44	11.54
ILMN_1663383	GEMIN5	gem (nuclear organelle) associated protein 5 (GEMIN5), mRNA.	NM_015465.1	-0.01	0	1.12	6.55	0.45	1.84	1.33	15.41	0.89	6.62	1.13	5.69
ILMN_2220184	GFPT1	glutamine-fructose-6-phosphate transaminase 1 (GFPT1), mRNA.	NM_002056.1	0.44	1.25	1.16	8.23	-0.13	0.2	1.06	10.05	1.2	10.68	0.73	3.24
ILMN_1723048	GJC2	gap junction protein, gamma 2, 47kDa (GJC2), mRNA.	NM_020435.2	0.9	3.96	2.49	17.71	0.3	1.04	2.33	38.89	2.03	29.92	1.59	9.45
ILMN_1773963	GNA15	guanine nucleotide binding protein (G protein), alpha 15 (Gq class) (GNA15), mRNA.	NM_002068.1	1.08	8.68	0.58	3.72	0.74	7.64	1.08	15.64	0.34	1.49	-0.49	2.25
ILMN_1806106	GNL3	guanine nucleotide binding protein-like 3 (nucleolar) (GNL3), transcript variant 1, mRNA.	NM_014366.4	-0.32	0.24	0.76	1.67	0.73	2.45	1.19	7.07	0.47	0.88	1.07	2.63
ILMN_2324056	GNL3	guanine nucleotide binding protein-like 3 (nucleolar) (GNL3), transcript variant 3, mRNA.	NM_206826.1	0.21	0.06	1.38	2.19	0.76	0.78	1.35	2.74	0.59	0.37	1.17	1.22
ILMN_1745991	GNRH1	gonadotropin-releasing hormone 1 (luteinizing-releasing hormone) (GNRH1), transcript variant 1, mRNA.	NM_000825.3	-0.08	0.07	1.2	10.21	0.17	0.27	1.48	15.59	1.31	11.18	1.28	9.88
ILMN_2316386	GPBAR1	G protein-coupled bile acid receptor 1 (GPBAR1), transcript variant 1, mRNA.	NM_001077191.1	0.17	0.16	2.02	14.45	0.26	0.84	1.48	22.17	1.22	14.58	1.84	11.77
ILMN_1782141	GRHL3	grainyhead-like 3 (Drosophila) (GRHL3), transcript variant 1, mRNA.	NM_021180.2	-0.11	0.09	1.06	6.48	0.16	0.18	1.48	11.56	1.32	8.29	1.17	6.56
ILMN_1670817	GRPEL1	GrpE-like 1, mitochondrial (E. coli) (GRPEL1), nuclear gene encoding mitochondrial protein, mRNA.	NM_025196.2	0.07	0.06	1.1	9.97	0.43	1.65	1.43	16.89	1	8.12	1.04	8.08
ILMN_1779376	GSK3B	glycogen synthase kinase 3 beta (GSK3B), mRNA.	NM_002093.2	-0.52	3.06	0.55	3.82	-1.4	11.35	0.04	0.04	1.44	11.2	1.07	9.46
ILMN_1742577	GTPBP4	GTP binding protein 4 (GTPBP4), mRNA.	NM_012341.2	0.11	0.12	1.07	9.47	0.28	1.11	1.47	24.11	1.19	15.53	0.96	7.13
ILMN_2211728	GUCA1B	guanylate cyclase activator 1B (retina) (GUCA1B), mRNA.	NM_002098.3	0.8	5	4.05	32.01	0.47	2.18	3.67	58.49	3.21	47.3	3.24	25.95
ILMN_1689264	GUCA1B	guanylate cyclase activator 1B (retina) (GUCA1B), mRNA.	NM_002098.4	0.12	0.15	2.1	20.26	-0.14	0.34	1.96	37.01	2.1	36.88	1.98	17.73
ILMN_1802690	GULP1	GULP, engulfment adaptor PTB domain containing 1 (GULP1), mRNA.	NM_016315.2	-0.66	0.85	0.57	0.82	-1.47	10.39	-0.45	1.19	1.03	5.07	1.23	2.89
ILMN_1709870	HES2	hairy and enhancer of split 2 (Drosophila) (HES2), mRNA.	NM_019089.3	1.1	6.88	0.87	5.4	0.39	1.2	1.28	12.84	0.89	5.88	-0.23	0.27
ILMN_1652762	HIC2	hypermethylated in cancer 2 (HIC2), mRNA.	NM_015094.2	0.25	0.45	1.74	15.13	-0.14	0.27	1.32	18	1.45	18.65	1.5	11.44
ILMN_1779373	HIST1H2BF	histone cluster 1, H2bf (HIST1H2BF), mRNA.	NM_003522.3	-0.28	0.43	1.76	12.86	-0.2	0.52	1.44	21.79	1.64	23.56	2.04	13.89
ILMN_1716195	HIST1H2BG	histone cluster 1, H2bg (HIST1H2BG), mRNA.	NM_003518.3	-0.64	1.67	0.4	0.79	-0.82	5.4	0.21	0.45	1.02	7.7	1.04	3.99
ILMN_1813314	HIST1H2BK	histone cluster 1, H2bk (HIST1H2BK), mRNA.	NM_080593.1	0.48	1.3	1.12	6.95	0.38	1.93	1.17	17.05	0.8	7.72	0.64	2.18
ILMN_1721127	HIST1H3D	histone cluster 1, H3d (HIST1H3D), mRNA.	NM_003530.3	-0.72	2.76	0.46	1.38	-0.55	2.24	1.27	11.82	1.82	18.64	1.19	6.25
ILMN_1695311	HLA-DMA	major histocompatibility complex, class II, DM alpha (HLA-DMA), mRNA.	NM_006120.2	0.34	0.9	1.97	17.3	0.31	0.92	1.37	16.58	1.06	9.49	1.62	12.77
ILMN_1743677	HNRNPU	heterogeneous nuclear ribonucleoprotein U (scaffold attachment factor A) (HNRNPU), transcript variant 1, mRNA.	NM_031844.2	1.18	8.94	0.21	0.45	1.16	15.79	0.25	0.98	-0.91	10.01	-0.98	6.59
ILMN_1682147	HOOK2	hook homolog 2 (Drosophila) (HOOK2), transcript variant 1, mRNA.	NM_013312.2	1.14	3.67	1.33	5.41	1.2	2.5	1.54	4.61	0.34	0.17	0.19	0.09
ILMN_1741483	HPS1	Hermansky-Pudlak syndrome 1 (HPS1), transcript variant 1, mRNA.	NM_000195.2	-0.07	0.04	0.94	4.18	-0.23	0.42	1.06	8.53	1.29	10.4	1	3.96
ILMN_2267787	HPS1	Hermansky-Pudlak syndrome 1 (HPS1), transcript variant 3, mRNA.	NM_182639.1	0.32	0.64	1.1	7.61	-0.39	1.07	1.2	10.46	1.58	14.61	0.78	3.73
ILMN_1903077		DKFZp686M05188_r1 686 (synonym: hlcc3) cDNA clone DKFZp686M05188 5, mRNA sequence		-0.54	1.13	0.6	1.73	0.65	2.49	1.28	9.84	0.63	2.15	1.14	4.59
ILMN_1863284		K-EST0218892 L18POOL1n1 cDNA clone L18POOL1n1-30-G08 5, mRNA sequence		0.43	1.76	1.85	17.92	0.45	1.97	1.61	21.66	1.16	11.42	1.42	12.2
ILMN_1864652		BX100705 Soares_parathyroid_tumor_NbHPA cDNA clone IMAGp998F18724, mRNA sequence		-0.08	0.07	1.12	8.96	0.04	0.05	1.05	13.67	1.01	11.28	1.2	8.69
ILMN_1872564		UI-E-EJ0-aiq-m-17-0-UI.r1 UI-E-EJ0 cDNA clone UI-E-EJ0-aiq-m-17-0-UI 5, mRNA sequence		0.02	0.01	1.32	11.84	0.04	0.05	1.23	15.7	1.19	13.07	1.3	10.44
ILMN_1823698		BX100240 Soares_fetal_liver_spleen_1NFLS_S1 cDNA clone IMAGp998E144195, mRNA sequence		-0.25	0.3	1.33	8.18	-0.29	0.95	0.86	8.74	1.14	12.54	1.58	9.2
ILMN_1830069		BX106991 NCI_CGAP_GC4 cDNA clone IMAGp998C124026, mRNA sequence		0.84	6.96	2.69	26.98	0.84	10.29	2.48	49.35	1.64	27.68	1.85	18.2
ILMN_1850875		qy81d02.x5 NCI_CGAP_Brn25 cDNA clone IMAGE:2018403 3, mRNA sequence		0.2	0.19	1.22	7.29	0.01	0.01	1.02	9.7	1	8.22	1.03	4.73
ILMN_1887216		mRNA; cDNA DKFZp686B06256 (from clone DKFZp686B06256)		-0.19	0.17	2.9	19.77	-0.24	0.57	2.94	46.02	3.18	46.04	3.09	19.46
ILMN_1915106		BX111417 NCI_CGAP_Pr28 cDNA clone IMAGp998N105566, mRNA sequence		-0.05	0.03	1.32	8.4	-0.25	0.74	0.91	9.97	1.16	13.1	1.38	7.8
ILMN_1887013		xj42a03.x1 Soares_NFL_T_GBC_S1 cDNA clone IMAGE:2659852 3, mRNA sequence		0.1	0.1	2.68	23.65	-0.18	0.42	2.43	40.86	2.61	40.71	2.58	21.37
ILMN_1876379		AGENCOURT_10404673 NIH_MGC_82 cDNA clone IMAGE:6615135 5, mRNA sequence		0.34	0.82	3.37	27.01	0.04	0.05	2.77	48.2	2.73	43.89	3.04	23.39
ILMN_1898124		cDNA FLJ38860 fis, clone MESAN2011977		0.71	2.91	1.61	11.76	0.95	6.01	2.03	23.11	1.08	7.23	0.9	4.32
ILMN_1826462		RST3117 Athersys RAGE Library cDNA, mRNA sequence		-0.11	0.14	0.93	8.33	-0.29	1.12	0.83	9.58	1.12	13.88	1.04	8.61
ILMN_1913701		UI-E-CQ0-adt-f-10-0-UI.r1 UI-E-CQ0 cDNA clone UI-E-CQ0-adt-f-10-0-UI 5, mRNA sequence		0.67	1.5	2.23	12.51	0.47	1.97	2.17	30.7	1.71	19.65	1.57	6.81
ILMN_1912125		oz48c05.x1 Soares_NhHMPu_S1 cDNA clone IMAGE:1678568 3, mRNA sequence		0.29	0.36	1.32	7.52	-0.53	2.41	0.48	2.19	1.01	7.76	1.04	4.35
ILMN_1851492		cDNA FLJ38388 fis, clone FEBRA2004485		0.02	0.01	1.17	9.19	0.23	0.73	1.73	29.56	1.5	21.83	1.14	7.86
ILMN_1911717		DKFZp313P1922_r1 313 (synonym: hlcc2) cDNA clone DKFZp313P1922 5, mRNA sequence		0.15	0.09	1.53	7.23	-0.04	0.04	1.14	9.73	1.18	8.99	1.38	5.29
ILMN_1906110		full-length cDNA clone CS0DC007YK10 of Neuroblastoma Cot 25-normalized of (human)		0.46	1.98	1.17	10.64	0.25	0.7	1.12	13.35	0.87	7.49	0.71	4.36
ILMN_1836486		CR738291 library (Ebert L) cDNA clone IMAGp971D2453 ; IMAGE:811744 5, mRNA sequence		0.47	1.04	1.92	12.78	0.23	0.42	1.52	15.24	1.29	10.12	1.45	7.8
ILMN_1837017		1008732 Human Fat Cell 5-Stretch Plus cDNA Library cDNA 5', mRNA sequence		0.01	0.01	1.67	21.39	0	0.01	1.89	45.5	1.89	41.79	1.66	19.78
ILMN_1911501		xi89f08.x1 NCI_CGAP_Mel3 cDNA clone IMAGE:2652999 3, mRNA sequence		0.37	0.71	1.3	8.23	-0.01	0.01	1.14	9.38	1.15	8.25	0.93	4.13
ILMN_1823803		mRNA full length insert cDNA clone EUROIMAGE 1090207		0.89	5.1	2.57	21.14	0.7	3.88	2.52	34.14	1.82	19.69	1.68	12.39
ILMN_1818149		DA371742 BRTHA2 cDNA clone BRTHA2001741 5, mRNA sequence		0.56	0.64	1.78	6.76	0.34	0.53	1.61	11.27	1.27	6.41	1.22	3.03
ILMN_1859908		cDNA clone MGC:13035 IMAGE:3613409, complete cds		0.32	0.76	1.33	11.23	-0.01	0.01	1.08	15.84	1.09	14.16	1.02	6.76
ILMN_1861057		hypothetical protein LOC338620, mRNA (cDNA clone IMAGE:6023208), partial cds		0.74	2.46	2.87	19	-0.11	0.18	2.5	40.1	2.62	38.78	2.13	12.58
ILMN_1886487		UI-H-BI1-adn-f-06-0-UI.s1 NCI_CGAP_Sub3 cDNA clone IMAGE:2717339 3, mRNA sequence		0.13	0.13	1.89	16.09	-0.05	0.07	1.47	22.43	1.52	21.09	1.75	13.56
ILMN_1838407		UI-1-BB1p-aul-d-04-0-UI.s1 NCI_CGAP_Pl6 cDNA clone UI-1-BB1p-aul-d-04-0-UI 3, mRNA sequence		-0.23	0.21	1.5	8.55	-0.48	1.43	1.04	7.27	1.52	12.22	1.73	9.19
ILMN_1913876		ig53c06.y1 HR85 islet cDNA 5, mRNA sequence		0.09	0.12	2.08	22.43	0.07	0.12	2.01	37.38	1.94	32.77	1.98	19.99
ILMN_1829707		BX387364 NEUROBLASTOMA COT 25-NORMALIZED cDNA clone CS0DC006YA13 3-PRIME, mRNA sequence		0.3	0.55	1.27	8.84	0.45	2.64	1.39	21.59	0.95	10.22	0.96	5.01
ILMN_1896455		BX096301 Soares retina N2b5HR cDNA clone IMAGp998C16444, mRNA sequence		0.79	1.55	1.32	4.73	0.32	0.8	1.08	9.33	0.76	4.19	0.53	0.61
ILMN_1854617		zw80d12.r1 Soares_testis_NHT cDNA clone IMAGE:782519 5 similar to contains Alu repetitive element;, mRNA sequence		-0.07	0.06	1.41	12.24	-0.12	0.25	1.04	13.66	1.16	14.4	1.49	11.75
ILMN_1901934		602971152F1 NIH_MGC_12 cDNA clone IMAGE:5110692 5, mRNA sequence		0.25	0.45	1.42	11.54	0.26	0.67	1.56	19.77	1.3	13.03	1.17	7.83
ILMN_1911420		AGENCOURT_15332205 Human Anterior Horn cDNA clone IMAGE:30516367 5, mRNA sequence		0.05	0.04	1.24	10.78	0.17	0.51	1.22	20.12	1.05	14	1.19	9.08
ILMN_1765954	HSD17B3	hydroxysteroid (17-beta) dehydrogenase 3 (HSD17B3), mRNA.	NM_000197.1	0.04	0.03	1.07	8.78	0.17	0.44	1.23	18.53	1.06	12.88	1.04	7.3
ILMN_1667060	HSF1	heat shock transcription factor 1 (HSF1), mRNA.	NM_005526.2	0.09	0.06	1.12	6.68	-0.3	0.72	0.82	5.95	1.12	8.92	1.03	5
ILMN_1773865	HSPA5	heat shock 70kDa protein 5 (glucose-regulated protein, 78kDa) (HSPA5), mRNA.	NM_005347.2	1.54	13.13	1.31	11.72	0.5	2.64	1.3	16.38	0.8	6.15	-0.23	0.4
ILMN_1704055	HSPC111	hypothetical protein HSPC111 (HSPC111), mRNA.	NM_016391.3	0.34	0.58	1.29	8.04	0.92	4.03	1.92	16.34	1	4.5	0.95	4.23
ILMN_1742031	IFRD2	interferon-related developmental regulator 2 (IFRD2), mRNA.	NM_006764.3	1.2	6.38	1.72	11.73	1.36	11.45	1.95	21.71	0.59	2.18	0.52	1.3
ILMN_1753502	IGSF11	immunoglobulin superfamily, member 11 (IGSF11), transcript variant 2, mRNA.	NM_001015887.1	-0.04	0.02	1.35	5.05	0.34	0.53	1.66	11.68	1.32	6.74	1.39	4.49
ILMN_1727248	INF2	inverted formin, FH2 and WH2 domain containing (INF2), transcript variant 2, mRNA.	NM_001031714.3	0.69	1.08	1.3	4.34	0.43	1.7	1.07	10.63	0.64	3.51	0.61	0.77
ILMN_1651229	IPO13	importin 13 (IPO13), mRNA.	NM_014652.2	0.23	0.27	1.01	5.81	-0.23	0.45	0.98	7.79	1.21	9.83	0.79	3.17
ILMN_1798172	IPO4	importin 4 (IPO4), mRNA.	NM_024658.3	0.79	1.98	1.64	7.96	0.99	9.48	1.52	20.57	0.53	2.77	0.85	2.17
ILMN_1725946	IRF6	interferon regulatory factor 6 (IRF6), mRNA.	NM_006147.2	0.86	4.3	1.11	7.26	0.45	2.16	1.36	18.19	0.92	8.24	0.24	0.3
ILMN_1759232	IRS1	insulin receptor substrate 1 (IRS1), mRNA.	NM_005544.1	1.06	6.98	1.87	15.96	0.77	4.42	2.14	26.37	1.36	11.72	0.81	4.39
ILMN_1814282	ISG20L1	interferon stimulated exonuclease gene 20kDa-like 1 (ISG20L1), mRNA.	NM_022767.2	0.68	1.4	1.62	7.6	1.13	4.81	2.92	25.58	1.79	10.53	0.94	2.54
ILMN_2412024	JMJD6	jumonji domain containing 6 (JMJD6), transcript variant 2, mRNA.	NM_015167.2	0.31	0.37	1.1	5.27	-0.01	0.01	0.99	6.07	1	5.3	0.79	2.45
ILMN_1711650	KCNE1L	KCNE1-like (KCNE1L), mRNA.	NM_012282.2	-0.19	0.22	1.53	11.35	0.15	0.25	1.55	19.89	1.4	15.14	1.72	11.84
ILMN_1786326	KCTD15	potassium channel tetramerisation domain containing 15 (KCTD15), mRNA.	NM_024076.1	1.06	6.21	1.68	12.95	0.85	8.26	1.5	22.3	0.65	4.65	0.62	2.33
ILMN_1718900	KCTD2	potassium channel tetramerisation domain containing 2 (KCTD2), mRNA.	NM_015353.1	0.55	0.96	1.2	4.98	0.25	0.57	1.12	10.96	0.87	6.02	0.65	1.26
ILMN_2163070	KHDC1	KH homology domain containing 1 (KHDC1), mRNA.	NM_030568.3	0.6	2.22	1.32	9.43	0.29	0.87	1.01	10.43	0.72	4.8	0.72	3.05
ILMN_1763637	KIAA0226	KIAA0226 (KIAA0226), mRNA.	NM_014687.1	-0.1	0.09	1.14	7.95	0.02	0.02	1.36	18.5	1.34	16.01	1.24	7.89
ILMN_2115591	KIAA0265	KIAA0265 protein (KIAA0265), mRNA.	NM_014997.2	-0.63	0.83	0.51	0.7	-0.24	0.34	0.8	3.69	1.04	5.15	1.14	2.66
ILMN_2261882	KIAA0368	KIAA0368 (KIAA0368), mRNA.	NM_001080398.1	0.57	2.38	1.4	11.23	0.91	7.91	1.12	12.32	0.21	0.36	0.83	4.42
ILMN_2066667	KIAA0409	KIAA0409 (KIAA0409), mRNA.	NM_015324.2	0.11	0.15	1.71	18.51	0.03	0.04	1.88	31.49	1.85	28.05	1.6	15.91
ILMN_1770719	KIAA0664	KIAA0664 (KIAA0664), mRNA.	NM_015229.3	0.79	1.44	1.97	8.33	1.19	11.55	2.16	30.43	0.97	7.66	1.18	3.08
ILMN_1729081	KIAA0692	PREDICTED: KIAA0692 protein, transcript variant 11 (KIAA0692), mRNA.	XM_930890.1	0.51	1.27	1.75	11.56	-0.01	0.01	1.22	14.16	1.23	12.52	1.24	6.2
ILMN_1742124	KIAA1128	KIAA1128 (KIAA1128), mRNA.	NM_018999.1	-0.08	0.02	1.2	2.39	0.17	0.16	1.26	6.31	1.09	4.07	1.27	2.17
ILMN_2129388	KIAA1128	KIAA1128 (KIAA1128), mRNA.	NM_018999.2	-0.2	0.06	1.51	2.83	0.51	0.73	1.44	6.21	0.94	2.24	1.72	2.93
ILMN_1732967	KIAA1949	KIAA1949 (KIAA1949), mRNA.	NM_133471.1	0.72	4.33	1.79	16.62	0.45	3.12	1.77	33.43	1.32	20.22	1.07	7.82
ILMN_1693401	KLHL28	kelch-like 28 (Drosophila) (KLHL28), mRNA.	NM_017658.3	-0.19	0.09	1.28	3.69	-0.58	1.74	0.57	1.95	1.15	6.33	1.47	3.95
ILMN_1795431	KLRA1	killer cell lectin-like receptor subfamily A, member 1 (KLRA1), mRNA.	NM_006611.2	0.08	0.06	1.27	9.82	0.22	0.54	1.33	17.79	1.12	11.75	1.19	7.9
ILMN_1669700	KPNA5	karyopherin alpha 5 (importin alpha 6) (KPNA5), mRNA.	NM_002269.2	-0.05	0.03	1.08	4.38	0.25	0.47	1.52	14.93	1.27	9.62	1.13	4.01
ILMN_1716093	KRT10	keratin 10 (epidermolytic hyperkeratosis; keratosis palmaris et plantaris) (KRT10), mRNA.	NM_000421.2	0.75	2.78	1.08	5.92	1.05	9.41	0.71	5.01	-0.34	0.93	0.33	0.44
ILMN_1736760	KRT16	keratin 16 (focal non-epidermolytic palmoplantar keratoderma) (KRT16), mRNA.	NM_005557.2	1.2	5.54	0.74	2.74	0.63	2.73	1.54	15.11	0.9	5.13	-0.46	0.81
ILMN_1801632	KRT5	keratin 5 (epidermolysis bullosa simplex, Dowling-Meara/Kobner/Weber-Cockayne types) (KRT5), mRNA.	NM_000424.3	0.75	4.36	1.26	10.63	0.63	6.04	1.02	15.39	0.4	2.31	0.51	2.01
ILMN_1669820	KRT6B	keratin 6B (KRT6B), mRNA.	NM_005555.3	1.14	5.54	1.61	10.26	0.53	1.57	1.35	10.51	0.82	3.61	0.47	0.96
ILMN_1698772	KRT6B	keratin 6B (KRT6B), mRNA.	NM_005555.3	1.34	5.62	1.82	9.93	0.66	2.01	1.45	9.94	0.79	2.69	0.49	0.74
ILMN_1754576	KRT6C	keratin 6C (KRT6C), mRNA.	NM_173086.3	0.78	1.78	1.09	3.92	0.35	0.61	1.33	8.88	0.98	4.35	0.31	0.23
ILMN_2163723	KRT7	keratin 7 (KRT7), mRNA.	NM_005556.3	1.46	6.33	1.71	8.9	1.61	18.96	2.38	34.36	0.77	4.95	0.25	0.17
ILMN_2366445	KRT80	keratin 80 (KRT80), transcript variant 1, mRNA.	NM_182507.2	-0.1	0.04	1.19	3.13	1.02	4	1.56	9.79	0.55	1.04	1.3	3.01
ILMN_2178226	KRT86	keratin 86 (KRT86), mRNA.	NM_002284.3	1.08	8.21	2.99	26.45	1.19	14.32	3.53	60.1	2.34	36.13	1.91	16.39
ILMN_1752548	KRTDAP	keratinocyte differentiation-associated protein (KRTDAP), mRNA.	NM_207392.1	0.47	1.05	1.29	7.69	0.61	4.18	1.62	23.95	1.01	9.97	0.82	3.09
ILMN_1733390	LARP2	La ribonucleoprotein domain family, member 2 (LARP2), transcript variant 3, mRNA.	NM_032239.2	-0.14	0.19	0.95	8.23	-0.13	0.19	1.58	18.09	1.71	18.18	1.09	8.79
ILMN_1660317	LEFTY1	left-right determination factor 1 (LEFTY1), mRNA.	NM_020997.2	0.21	0.22	2.3	16.09	0.4	2	2.6	46.32	2.2	35.21	2.09	13.18
ILMN_2367671	LIMK2	LIM domain kinase 2 (LIMK2), transcript variant 2b, mRNA.	NM_016733.2	0.73	3.91	1.37	11.49	0.3	0.71	1.59	17.85	1.29	11.21	0.65	3.08
ILMN_1687960	LIMK2	LIM domain kinase 2 (LIMK2), transcript variant 2b, mRNA.	NM_016733.2	0.81	4	1.51	11.34	0.21	0.36	1.49	15.52	1.29	10.63	0.69	2.87
ILMN_1677122	LOC130074	p20 (LOC130074), mRNA.	NM_001009993.2	0.17	0.12	1.04	4.39	0.09	0.1	1.01	6.72	0.92	4.78	0.87	2.64
ILMN_1693119	LOC130576	hypothetical protein LOC130576 (LOC130576), mRNA.	NM_177964.3	1.2	7.75	1.23	8.91	1.04	7.25	0.98	7.1	-0.06	0.03	0.03	0.01
ILMN_1741506	LOC149134	hypothetical protein LOC149134 (LOC149134), mRNA.	NM_207326.1	0.14	0.19	1.1	9.95	0.05	0.07	1.04	12.01	0.99	9.62	0.96	7.23
ILMN_1703316	LOC255783	hypothetical protein LOC255783 (LOC255783) on chromosome 19.	NR_002797.1	0.44	1.43	1.5	12.43	0.29	0.66	1.23	11.55	0.94	6.21	1.06	6.81
ILMN_1715209	LOC283553	PREDICTED: hypothetical LOC283553 (LOC283553), misc RNA.	XR_017821.1	0.44	1.27	2.54	20.49	0.02	0.03	2.48	40.75	2.46	37.02	2.1	15.67
ILMN_1759325	LOC283951	hypothetical protein LOC283951 (LOC283951), mRNA.	NM_001010878.1	0.11	0.11	1.23	10.12	-0.01	0.01	1.06	14.59	1.07	13.02	1.12	7.79
ILMN_1775584	LOC285141	PREDICTED: similar to CG14853-PB (LOC285141), mRNA.	XM_939141.1	0.08	0.09	1.27	12.3	-0.03	0.04	1.07	16.98	1.1	15.58	1.18	10.12
ILMN_1675803	LOC285550	PREDICTED: misc_RNA (LOC285550), miscRNA.	XR_017764.1	0.4	1.58	1.36	13.24	0.62	4.91	1.76	29.6	1.14	13.92	0.96	7.42
ILMN_1690911	LOC388272	similar to RIKEN cDNA 4921524J17 (LOC388272), mRNA.	NM_001001436.2	-0.24	0.13	1.09	2.94	0.42	0.85	1.23	7.6	0.81	2.89	1.33	3.47
ILMN_1700436	LOC390856	PREDICTED: similar to 60S ribosomal protein L29 (P23) (LOC390856), mRNA.	XM_938867.1	0	0	2.25	20.32	0	0.01	2.01	40.99	2.01	37.81	2.25	18.88
ILMN_1783712	LOC400506	similar to TSG118.1 (LOC400506), mRNA.	NM_001012991.1	0.3	0.38	1.24	6.85	0.29	0.73	1.07	10.08	0.78	4.91	0.94	3.71
ILMN_1699451	LOC401218	PREDICTED: similar to CG31232-PA, isoform A (LOC401218), mRNA.	XR_016722.1	0.27	0.28	1.38	7.23	0.05	0.05	1.12	11.13	1.07	8.97	1.11	4.36
ILMN_1770994	LOC440900	PREDICTED: hypothetical LOC440900 (LOC440900), mRNA.	XM_498909.3	0.28	0.63	4.03	31.98	-0.2	0.43	3.48	54.4	3.68	53.37	3.75	28.59
ILMN_1765032	LOC440993	hypothetical gene supported by AK128346 (LOC440993), mRNA.	NM_001013714.1	0.59	2.97	2.51	22.74	0.36	1.13	2.41	34.69	2.05	25.55	1.92	16.33
ILMN_1702496	LOC441461	PREDICTED: hypothetical gene supported by BC030123 (LOC441461), mRNA.	XM_499157.3	-1.13	6.53	0.69	3.28	-0.9	8.71	0.39	1.97	1.29	15.16	1.82	12.42
ILMN_1743943	LOC441737	PREDICTED: similar to hect domain and RLD 2 (LOC441737), mRNA.	XM_497474.2	0.38	0.83	1.54	11.06	-0.1	0.11	1.21	10.03	1.31	9.98	1.16	6.46
ILMN_1752406	LOC642282	PREDICTED: similar to Tektin-3, transcript variant 1 (LOC642282), mRNA.	XM_925818.1	0.19	0.19	2.09	15.03	0.02	0.03	1.85	25.51	1.83	22.52	1.9	12.18
ILMN_1695026	LOC642775	PREDICTED: hypothetical protein LOC642775 (LOC642775), mRNA.	XM_926197.1	0.68	2.9	1.95	15.28	0.86	6.54	1.79	23.76	0.93	7.17	1.27	7.88
ILMN_1681728	LOC643505	PREDICTED: similar to large subunit ribosomal protein L36a (LOC643505), mRNA.	XM_926824.1	0.2	0.31	1.28	10.99	-0.38	0.91	0.75	3.93	1.14	7.23	1.08	7.71
ILMN_1701753	LOC644063	PREDICTED: similar to heterogeneous nuclear ribonucleoprotein K (LOC644063), mRNA.	XR_016547.1	1	2.97	1.29	5.24	0.54	1.85	1.02	7.05	0.48	1.3	0.28	0.19
ILMN_1661078	LOC644844	PREDICTED: hypothetical LOC644844 (LOC644844), mRNA.	XM_927939.2	1.24	3.63	1.01	2.91	1.81	16.22	1.77	16.84	-0.04	0.02	-0.23	0.11
ILMN_1656630	LOC644891	PREDICTED: hypothetical protein LOC644891 (LOC644891), mRNA.	XM_927976.1	0.15	0.23	1.52	15.23	0.08	0.12	1.78	27.63	1.7	23.38	1.37	12.26
ILMN_1679042	LOC645937	PREDICTED: similar to zinc finger protein 598 (LOC645937), mRNA.	XM_928905.2	0.46	0.7	1.16	5	0.38	0.94	1.11	8.25	0.73	3.15	0.7	1.61
ILMN_1766280	LOC645963	PREDICTED: similar to ubiquitin specific protease 6 (LOC645963), mRNA.	XM_928930.1	-0.02	0.01	1.73	12.38	-0.24	0.54	1.44	16.75	1.68	18.92	1.76	11.32
ILMN_1740571	LOC647859	PREDICTED: similar to Occludin (LOC647859), mRNA.	XM_001130815.1	0.33	0.64	2.24	17.33	0.03	0.04	1.82	24.06	1.79	21	1.91	13.29
ILMN_1735179	LOC648434	PREDICTED: hypothetical protein LOC648434 (LOC648434), mRNA.	XM_937486.1	0.6	0.83	1.28	4.3	-0.22	0.35	0.89	5.34	1.12	6.89	0.68	1.01
ILMN_1668466	LOC648585	PREDICTED: similar to p53-regulated apoptosis-inducing protein 1, transcript variant 1 (LOC648585), mRNA.	XM_940684.1	0.21	0.21	1.92	12.98	-0.22	0.6	1.3	18.23	1.52	20.56	1.71	10.1
ILMN_1808122	LOC652377	PREDICTED: similar to C1q and tumor necrosis factor related protein 4 (LOC652377), mRNA.	XR_019346.1	0.02	0.01	1.07	6.79	-0.09	0.15	1.18	15.9	1.26	15.75	1.05	5.64
ILMN_1810433	LOC652545	PREDICTED: similar to Protein C21orf70 homolog (LOC652545), mRNA.	XM_942035.1	0.47	1.25	1.18	7.5	0.37	1.18	1.26	13.29	0.89	6.26	0.71	2.66
ILMN_1759870	LOC653066	PREDICTED: similar to inhibitor of growth family, member 5, transcript variant 4 (LOC653066), mRNA.	XM_930921.1	0.29	0.37	1.48	8.9	0.42	2.08	1.58	24.11	1.16	13.36	1.19	5.54
ILMN_1746706	LOC653103	PREDICTED: similar to Ankyrin repeat domain protein 11 (Ankyrin repeat-containing cofactor 1) (LOC653103), mRNA.	XM_926036.1	0.23	0.33	1.22	8.82	-0.27	1.13	1.22	19.89	1.49	23.94	1	5.61
ILMN_1651232	LOC653113	PREDICTED: hypothetical LOC653113 (LOC653113), mRNA.	XR_016352.1	0.04	0.03	1.23	9.36	0.22	0.54	1.2	13.98	0.97	8.55	1.2	7.88
ILMN_1772292	LOC653752	PREDICTED: similar to dexamethasone-induced transcript (LOC653752), mRNA.	XM_933660.1	-0.67	4.74	0.64	4.93	-0.28	0.87	0.93	10.03	1.21	13.61	1.31	12.28
ILMN_1696946	LOC654174	PREDICTED: similar to lethal (2) k00619 CG4775-PA (LOC654174), mRNA.	XM_940438.2	0.2	0.17	1.23	6.07	-0.32	0.96	0.84	7.27	1.16	11.05	1.03	3.81
ILMN_1665601	LOC728944	PREDICTED: similar to THAP domain-containing protein 4 (LOC728944), mRNA.	XM_001128859.1	0.25	0.33	1.13	6.92	0.26	0.62	1.14	11.32	0.88	6.17	0.88	3.91
ILMN_1710220	LOC729985	PREDICTED: similar to CDC42-binding protein kinase beta (LOC729985), mRNA.	XM_001131964.1	0.73	3.48	1.67	13.3	0.91	6.39	1.39	14.41	0.48	1.63	0.94	5.17
ILMN_1791827	LOC731878	PREDICTED: similar to MAPK-interacting and spindle-stabilizing protein (LOC731878), mRNA.	XR_015638.1	-0.51	2.11	0.53	2.68	-0.1	0.17	1.09	13.99	1.19	14.17	1.03	7.1
ILMN_1737561	LOC88523	CG016 (LOC88523), mRNA.	NM_033111.2	0.53	2.03	1.8	15.04	0.48	1.51	1.45	13.57	0.97	5.83	1.27	8.68
ILMN_1687863	LSS	lanosterol synthase (2,3-oxidosqualene-lanosterol cyclase) (LSS), transcript variant 2, mRNA.	NM_001001438.1	-0.02	0.02	1.74	15.57	0.2	0.55	2.3	41	2.1	33.72	1.76	14.44
ILMN_1658271	LSS	lanosterol synthase (2,3-oxidosqualene-lanosterol cyclase) (LSS), transcript variant 1, mRNA.	NM_002340.3	0.44	0.88	1.1	5.75	0.12	0.21	1.07	11.41	0.94	8	0.66	1.87
ILMN_1795464	LTA	lymphotoxin alpha (TNF superfamily, member 1) (LTA), mRNA.	NM_000595.2	-0.1	0.09	2.01	18.07	0.05	0.07	2.17	36.77	2.12	32.71	2.1	17.52
ILMN_1764362	LYAR	Ly1 antibody reactive homolog (mouse) (LYAR), mRNA.	NM_017816.1	0.6	3.36	1.1	9.83	0.71	3.19	1.28	10.52	0.57	1.91	0.5	2.26
ILMN_1735553	MAP3K9	mitogen-activated protein kinase kinase kinase 9 (MAP3K9), mRNA.	NM_033141.2	0.64	1.19	1.11	4.09	0.38	0.88	1.15	8.27	0.76	3.28	0.47	0.57
ILMN_1811574	MAPK8IP3	mitogen-activated protein kinase 8 interacting protein 3 (MAPK8IP3), transcript variant 2, mRNA.	NM_001040439.1	0.54	0.63	1.24	3.87	0.37	1.04	1.28	12.08	0.91	5.66	0.7	1
ILMN_2293744	MARVELD2	MARVEL domain containing 2 (MARVELD2), transcript variant 1, mRNA.	NM_001038603.1	0.18	0.16	1.12	6	-0.19	0.36	1.16	11.61	1.36	13.12	0.94	3.78
ILMN_2303166	MBNL3	muscleblind-like 3 (Drosophila) (MBNL3), transcript variant R, mRNA.	NM_133486.1	1.22	2.79	1.59	5.1	1.79	8.26	1.96	10.56	0.17	0.08	0.37	0.21
ILMN_2398939	MBP	myelin basic protein (MBP), transcript variant 3, mRNA.	NM_001025090.1	-0.26	0.15	1.45	4.96	-1.98	10.59	-0.62	1.3	1.36	5.05	1.71	5.52
ILMN_2331544	MBP	myelin basic protein (MBP), transcript variant 7, mRNA.	NM_001025101.1	-0.12	0.05	1.61	5.62	-1.68	8.02	-0.37	0.51	1.31	4.74	1.73	5.42
ILMN_1745513	MCAT	malonyl CoA:ACP acyltransferase (mitochondrial) (MCAT), nuclear gene encoding mitochondrial protein, transcript variant 1, mRNA.	NM_173467.4	0.34	0.57	1.4	8.92	0.34	0.87	1.17	10.39	0.83	4.79	1.06	5.03
ILMN_2065822	MCM3APAS	MCM3 minichromosome maintenance deficient 3 (S. cerevisiae) associated protein antisense (MCM3APAS) on chromosome 21.	NR_002776.1	0.87	3.31	1.38	7.95	0.83	4.5	1.58	15.45	0.75	3.51	0.51	1.06
ILMN_1668748	MED15	mediator complex subunit 15 (MED15), transcript variant 1, mRNA.	NM_001003891.1	1.04	2.4	1.34	4.38	0.15	0.19	1.06	7.43	0.91	4.83	0.3	0.16
ILMN_1801610	METRNL	PREDICTED: meteorin, glial cell differentiation regulator-like (METRNL), mRNA.	XM_941466.2	0.07	0.04	1	4.36	-0.09	0.12	1.23	12.18	1.32	12.02	0.94	3.21
ILMN_1791593	MGC24039	hypothetical protein MGC24039 (MGC24039), mRNA.	NM_144973.3	-0.19	0.17	0.91	4.28	-0.43	1.83	1.09	11.88	1.52	17.88	1.09	4.95
ILMN_2143795	MGC4677	hypothetical protein MGC4677 (MGC4677), mRNA.	NM_052871.3	0.93	4.89	1.06	6.81	0.78	6.03	1.14	12.79	0.36	1.16	0.13	0.09
ILMN_1745697	MGRN1	mahogunin, ring finger 1 (MGRN1), mRNA.	NM_015246.1	0.54	0.52	1.07	2.52	0.49	1.42	1.05	7.13	0.56	1.78	0.53	0.44
ILMN_2282077	MIB2	mindbomb homolog 2 (Drosophila) (MIB2), mRNA.	NM_080875.1	0.87	3.07	1.17	5.8	0.72	5.48	1.06	12.05	0.34	1.14	0.3	0.29
ILMN_1797929	MICA	MHC class I polypeptide-related sequence A (MICA), mRNA.	NM_000247.1	-0.3	0.39	0.99	4.92	-0.16	0.25	0.93	7.39	1.09	8.42	1.28	6.44
ILMN_1718718	MKKS	McKusick-Kaufman syndrome (MKKS), transcript variant 2, mRNA.	NM_170784.1	0.49	2.49	1.61	16.18	0.19	0.54	1.02	14.54	0.83	9.02	1.12	9.37
ILMN_1651767	MKL1	megakaryoblastic leukemia (translocation) 1 (MKL1), mRNA.	NM_020831.3	0.69	1.22	1.01	3.11	0.39	1.27	1.05	9.55	0.66	3.43	0.32	0.22
ILMN_1791508	MMP28	matrix metallopeptidase 28 (MMP28), transcript variant 1, mRNA.	NM_024302.3	1.05	3.34	0.46	0.83	1.02	7.27	0.82	5.41	-0.19	0.22	-0.59	0.97
ILMN_2192072	MMP7	matrix metallopeptidase 7 (matrilysin, uterine) (MMP7), mRNA.	NM_002423.3	1	3.88	1.2	5.99	0.68	4.18	1.07	10.59	0.39	1.26	0.2	0.14
ILMN_2103591	MORC2	MORC family CW-type zinc finger 2 (MORC2), mRNA.	NM_014941.1	0.12	0.09	1.53	9.79	0.57	2.45	1.85	21.85	1.28	10.73	1.4	7.65
ILMN_1679995	MPP6	membrane protein, palmitoylated 6 (MAGUK p55 subfamily member 6) (MPP6), mRNA.	NM_016447.2	0.7	4.62	1.41	13.97	0.48	1.47	1.65	15.93	1.16	7.69	0.72	4.67
ILMN_1795739	MPZL3	myelin protein zero-like 3 (MPZL3), mRNA.	NM_198275.1	-0.25	0.38	1.12	7.62	0.26	0.45	1.48	13.45	1.23	8.47	1.37	8.93
ILMN_1678692	M-RIP	myosin phosphatase-Rho interacting protein (M-RIP), transcript variant 2, mRNA.	NM_201274.2	0.82	4.01	1.14	7.75	0.58	3.35	1.03	10.71	0.45	1.88	0.33	0.57
ILMN_1699603	MRPL12	mitochondrial ribosomal protein L12 (MRPL12), nuclear gene encoding mitochondrial protein, mRNA.	NM_002949.2	1.29	6.93	1.69	11.18	1.46	10.97	1.7	15.16	0.23	0.24	0.4	0.69
ILMN_1652147	MRPL43	mitochondrial ribosomal protein L43 (MRPL43), nuclear gene encoding mitochondrial protein, transcript variant 2, mRNA.	NM_176792.1	1.15	6.5	2.56	19.11	0.51	2.47	2.08	29.96	1.57	17.97	1.41	8.52
ILMN_1681324	MRPL49	mitochondrial ribosomal protein L49 (MRPL49), nuclear gene encoding mitochondrial protein, mRNA.	NM_004927.2	0.2	0.33	1.3	11.06	0.15	0.28	1.2	14.3	1.05	10	1.1	7.73
ILMN_1714515	MRPS12	mitochondrial ribosomal protein S12 (MRPS12), nuclear gene encoding mitochondrial protein, transcript variant 2, mRNA.	NM_033362.2	0.58	1.41	1.41	7.98	0.56	3.96	1.41	21.31	0.85	8.15	0.84	2.84
ILMN_1689800	MRTO4	mRNA turnover 4 homolog (S. cerevisiae) (MRTO4), mRNA.	NM_016183.3	1.05	5.59	1.54	10.91	0.77	4.42	1.24	11.55	0.47	1.53	0.49	1.29
ILMN_1713088	MSI2	musashi homolog 2 (Drosophila) (MSI2), transcript variant 1, mRNA.	NM_138962.2	-0.7	3.1	0.52	2.04	-0.97	10.63	0.17	0.46	1.14	13.24	1.22	7.53
ILMN_1674706	MTHFD2	methylenetetrahydrofolate dehydrogenase (NADP+ dependent) 2, methenyltetrahydrofolate cyclohydrolase (MTHFD2), nuclear gene encoding mitochondrial protein, transcript variant 1, mRNA.	NM_006636.3	0.83	3.42	1.42	9.01	0.8	2.69	1.49	9.54	0.69	1.82	0.58	1.62
ILMN_2405521	MTHFD2	methylenetetrahydrofolate dehydrogenase (NADP+ dependent) 2, methenyltetrahydrofolate cyclohydrolase (MTHFD2), nuclear gene encoding mitochondrial protein, transcript variant 2, mRNA.	NM_001040409.1	1.29	6.82	2.53	17.48	0.68	2.17	1.64	12.47	0.96	4.07	1.24	6.24
ILMN_1652434	MTHFD2L	methylenetetrahydrofolate dehydrogenase (NADP+ dependent) 2-like (MTHFD2L), mRNA.	NM_001004346.2	-0.2	0.25	0.82	4.68	-0.19	0.44	0.85	8.57	1.04	10.56	1.02	5.71
ILMN_2355665	MTP18	mitochondrial protein 18 kDa (MTP18), nuclear gene encoding mitochondrial protein, transcript variant 1, mRNA.	NM_016498.3	0.76	7.04	1.14	13.39	1.29	14.45	1.17	13.18	-0.12	0.13	0.38	2
ILMN_1653278	MUC20	mucin 20, cell surface associated (MUC20), transcript variant S, mRNA.	NM_001098516.1	0.55	1.22	2.28	14.3	0.49	1.68	2.02	23.54	1.53	13.63	1.73	9.06
ILMN_1773814	MUSTN1	musculoskeletal, embryonic nuclear protein 1 (MUSTN1), mRNA.	NM_205853.2	0.42	0.79	1.08	5.71	-0.07	0.09	0.94	8.5	1.01	8.33	0.66	1.96
ILMN_1786310	MVK	mevalonate kinase (mevalonic aciduria) (MVK), mRNA.	NM_000431.1	0.41	0.64	1.17	5.67	0.38	1.22	1.3	13.93	0.93	6.66	0.76	2.19
ILMN_1660086	MYH11	myosin, heavy chain 11, smooth muscle (MYH11), transcript variant SM1A, mRNA.	NM_002474.2	0.01	0	1.8	18.61	0.04	0.06	1.76	29.47	1.71	25.77	1.8	17.13
ILMN_1694980	NAGLU	N-acetylglucosaminidase, alpha- (Sanfilippo disease IIIB) (NAGLU), mRNA.	NM_000263.3	0.36	0.44	1.11	4.7	0.96	5.88	1.55	14.91	0.6	2.17	0.75	1.87
ILMN_2181125	NAPB	N-ethylmaleimide-sensitive factor attachment protein, beta (NAPB), mRNA.	NM_022080.1	0.15	0.19	1.32	11.09	-0.1	0.14	0.98	8.43	1.08	8.68	1.16	8.32
ILMN_1765001	NAT6	N-acetyltransferase 6 (NAT6), mRNA.	NM_012191.2	0.62	1.61	1.19	6.13	0.51	1.98	1.15	10.42	0.64	3.01	0.57	1.3
ILMN_1705064	NDEL1	nudE nuclear distribution gene E homolog (A. nidulans)-like 1 (NDEL1), transcript variant 2, mRNA.	NM_030808.3	-0.2	0.39	0.99	9.16	-0.47	3.56	1.18	19.97	1.65	28.82	1.19	10.4
ILMN_2397199	NDEL1	nudE nuclear distribution gene E homolog (A. nidulans)-like 1 (NDEL1), transcript variant 2, mRNA.	NM_030808.3	-0.03	0.01	1.32	5.76	-0.37	1.08	1.6	18.32	1.96	22.32	1.34	5.07
ILMN_1675927	NEBL	nebulette (NEBL), transcript variant 2, mRNA.	NM_213569.1	0.27	0.53	1.32	10.96	-0.12	0.21	0.93	10.2	1.05	10.85	1.05	7.03
ILMN_1698715	NHLRC2	NHL repeat containing 2 (NHLRC2), mRNA.	NM_198514.2	-0.64	2.82	0.82	5.01	-0.59	3.95	0.88	9.07	1.48	18.64	1.46	10.36
ILMN_1715864	NHS	Nance-Horan syndrome (congenital cataracts and dental anomalies) (NHS), mRNA.	NM_198270.2	-0.1	0.07	1.25	7.78	0.37	1.08	1.38	14.31	1.01	7.26	1.35	7.59
ILMN_2232430	NMD3	NMD3 homolog (S. cerevisiae) (NMD3), mRNA.	NM_015938.2	-0.39	0.4	0.63	1.35	-0.03	0.03	1.16	10.28	1.19	9.28	1.02	2.73
ILMN_1727348	NMD3	NMD3 homolog (S. cerevisiae) (NMD3), mRNA.	NM_015938.3	-0.39	0.32	0.78	1.66	0.31	0.53	1.16	7.38	0.85	3.48	1.17	2.88
ILMN_1741133	NME1	non-metastatic cells 1, protein (NM23A) expressed in (NME1), transcript variant 2, mRNA.	NM_000269.2	1.18	7.22	1.31	9.37	1.5	14.93	1.5	16.07	0	0	0.13	0.09
ILMN_1693430	NME1-NME2	NME1-NME2 (NME1-NME2), mRNA.	NM_001018136.1	-0.05	0.02	1.07	4.58	0.44	1.5	1.23	11.81	0.79	4.59	1.12	4.15
ILMN_2234873	NME2	non-metastatic cells 2, protein (NM23B) expressed in (NME2), transcript variant 3, mRNA.	NM_001018138.1	1.04	3.56	1.51	7.42	0.7	3.78	1.27	12.38	0.57	2.39	0.47	0.66
ILMN_1692413	NMNAT1	nicotinamide nucleotide adenylyltransferase 1 (NMNAT1), mRNA.	NM_022787.2	-0.1	0.03	1.35	3.64	-0.5	1.26	0.52	1.58	1.03	4.91	1.45	3.44
ILMN_1689110	NOB1	NIN1/RPN12 binding protein 1 homolog (S. cerevisiae) (NOB1), mRNA.	NM_014062.1	0.58	1.37	1.52	8.55	0.32	0.76	1.15	10.05	0.84	4.81	0.94	3.35
ILMN_1723158	NOL1	nucleolar protein 1, 120kDa (NOL1), transcript variant 2, mRNA.	NM_001033714.1	0.38	1.94	1.6	18.51	0.49	2.96	1.77	29.29	1.29	16.49	1.22	12.64
ILMN_2328433	NOL1	nucleolar protein 1, 120kDa (NOL1), transcript variant 1, mRNA.	NM_006170.2	0.5	0.95	1.27	6.46	0.59	1.32	2.17	16.53	1.58	8.48	0.78	2.28
ILMN_1787628	NOL5A	nucleolar protein 5A (56kDa with KKE/D repeat) (NOL5A), mRNA.	NM_006392.2	0.41	0.4	1.2	4	0.8	4.55	1.41	13.69	0.61	2.49	0.79	1.45
ILMN_2044832	NOL5A	nucleolar protein 5A (56kDa with KKE/D repeat) (NOL5A), mRNA.	NM_006392.2	0.25	0.48	1.08	8.77	1.06	6.6	1.59	14.44	0.53	1.53	0.84	5.1
ILMN_2184640	NOLC1	nucleolar and coiled-body phosphoprotein 1 (NOLC1), mRNA.	NM_004741.1	0.29	0.52	1.19	8.44	0.98	5.66	1.51	13.3	0.53	1.56	0.9	4.72
ILMN_1787186	NOV	nephroblastoma overexpressed gene (NOV), mRNA.	NM_002514.2	0.47	1.43	1.11	7.72	0.18	0.35	1.28	13.89	1.09	9.32	0.65	2.61
ILMN_2135798	NR2C2AP	nuclear receptor 2C2-associated protein (NR2C2AP), mRNA.	NM_176880.4	0.34	1.16	1.06	9.66	1.24	13.68	1.18	13.67	-0.05	0.04	0.72	4.6
ILMN_2352881	NR6A1	nuclear receptor subfamily 6, group A, member 1 (NR6A1), transcript variant 2, mRNA.	NM_001489.3	0.05	0.03	1.44	9.21	-0.04	0.05	1.21	14.69	1.24	13.61	1.4	7.7
ILMN_1737252	NRG1	neuregulin 1 (NRG1), transcript variant GGF2, mRNA.	NM_013962.2	1.45	8.44	0.72	3.07	1.01	5.55	0.17	0.25	-0.84	3.64	-0.73	2.6
ILMN_1670809	NRM	nurim (nuclear envelope membrane protein) (NRM), mRNA.	NM_007243.1	1.12	4.61	1.46	7.86	1.31	9.15	0.9	5.02	-0.41	0.83	0.34	0.37
ILMN_1692163	NSDHL	NAD(P) dependent steroid dehydrogenase-like (NSDHL), mRNA.	NM_015922.1	0.49	2.97	1.01	10.39	0.15	0.42	1.11	18.4	0.96	12.86	0.51	3.07
ILMN_1787885	NUDT18	nudix (nucleoside diphosphate linked moiety X)-type motif 18 (NUDT18), mRNA.	NM_024815.3	0.11	0.12	1.13	9.98	0.1	0.17	1.14	15.09	1.04	11.42	1.02	7.62
ILMN_1724907	NUDT3	nudix (nucleoside diphosphate linked moiety X)-type motif 3 (NUDT3), mRNA.	NM_006703.2	0.65	3.64	1.6	14.85	0.42	2.04	1.28	17.24	0.86	7.69	0.95	6.59
ILMN_1705907	NUP153	nucleoporin 153kDa (NUP153), mRNA.	NM_005124.2	0.24	0.27	1.06	5.52	0.75	5.01	1.24	13.55	0.5	2.08	0.82	2.95
ILMN_1791226	NXN	nucleoredoxin (NXN), mRNA.	NM_022463.3	0.41	1.03	1.11	7.3	0.51	3.62	1.17	17.19	0.66	5.52	0.7	2.81
ILMN_1797660	NXNL2	nucleoredoxin-like 2 (NXNL2), mRNA.	NM_145283.1	0.41	1.47	2.94	25.93	-0.16	0.42	2.01	37.74	2.17	37.97	2.52	21.37
ILMN_1760280	NXT1	NTF2-like export factor 1 (NXT1), mRNA.	NM_013248.2	0.68	5.84	1.37	16.24	0.78	7.88	1.52	24.85	0.74	6.72	0.69	5.82
ILMN_1731729	OCLN	PREDICTED: occludin (OCLN), mRNA.	XM_001128133.1	0.23	0.29	1.09	6.62	-0.24	0.44	0.92	6.56	1.16	8.56	0.86	3.78
ILMN_1728224	OGFR	opioid growth factor receptor (OGFR), mRNA.	NM_007346.2	0.29	0.28	1.5	7.47	0.22	0.54	1.66	23.91	1.44	17.27	1.21	4.56
ILMN_2203544	OR2A9P	olfactory receptor, family 2, subfamily A, member 9 pseudogene (OR2A9P) on chromosome 7.	NR_002157.1	0.65	3.76	2.5	23.22	0.19	0.38	1.9	26.62	1.71	20.62	1.85	16.18
ILMN_1727459	ORC1L	origin recognition complex, subunit 1-like (yeast) (ORC1L), mRNA.	NM_004153.2	0.18	0.23	1.05	7.69	1.08	8.21	0.2	0.39	-0.88	5.29	0.87	4.94
ILMN_1734542	OVGP1	oviductal glycoprotein 1, 120kDa (mucin 9, oviductin) (OVGP1), mRNA.	NM_002557.3	0.04	0.03	1.46	13.77	0.27	0.78	1.69	24.35	1.42	16.76	1.42	12.03
ILMN_1752226	P2RY11	purinergic receptor P2Y, G-protein coupled, 11 (P2RY11), mRNA.	NM_002566.4	0.65	1.33	2.42	13.22	0.87	5.6	2.49	32.75	1.63	15.97	1.77	7.77
ILMN_2099745	P53AIP1	p53-regulated apoptosis-inducing protein 1 (P53AIP1), mRNA.	NM_022112.1	0.19	0.2	2.11	15.21	0.19	0.5	1.98	35.37	1.8	28.44	1.92	12.36
ILMN_1773760	PAICS	phosphoribosylaminoimidazole carboxylase, phosphoribosylaminoimidazole succinocarboxamide synthetase (PAICS), transcript variant 2, mRNA.	NM_006452.3	0.64	4.86	1.4	15.6	1.44	18.07	1.1	12.53	-0.34	1.1	0.75	6.1
ILMN_2392546	PAICS	phosphoribosylaminoimidazole carboxylase, phosphoribosylaminoimidazole succinocarboxamide synthetase (PAICS), transcript variant 2, mRNA.	NM_006452.3	0.77	7.29	1.44	17.48	1.37	16.66	1.06	11.8	-0.31	0.9	0.67	5.76
ILMN_1700762	PBX4	pre-B-cell leukemia homeobox 4 (PBX4), mRNA.	NM_025245.1	0.37	0.6	1.1	5.62	0.45	1.83	1.1	10.88	0.64	3.48	0.73	2.24
ILMN_1703324	PDSS1	prenyl (decaprenyl) diphosphate synthase, subunit 1 (PDSS1), mRNA.	NM_014317.3	0.5	2.05	1.42	12.22	1.2	8.38	1.12	7.96	-0.09	0.05	0.91	5.75
ILMN_2080611	PDSS1	prenyl (decaprenyl) diphosphate synthase, subunit 1 (PDSS1), mRNA.	NM_014317.3	0.44	1.56	1.44	12.35	1.17	7.94	1.57	14.24	0.4	0.85	1	6.54
ILMN_1708341	PDZK1	PDZ domain containing 1 (PDZK1), mRNA.	NM_002614.3	0.68	2.83	1.08	6.97	-0.15	0.33	1.09	13.68	1.24	14.9	0.39	0.85
ILMN_1738095	PER2	period homolog 2 (Drosophila) (PER2), mRNA.	NM_022817.2	0.59	2.37	1.96	15.98	0.22	0.5	1.3	15.22	1.08	9.74	1.37	9.27
ILMN_1660986	PER3	period homolog 3 (Drosophila) (PER3), mRNA.	NM_016831.1	0.61	2.3	1.22	8.39	0.28	0.96	1.02	12.25	0.73	5.96	0.61	2.16
ILMN_1723436	PFKFB2	6-phosphofructo-2-kinase/fructose-2,6-biphosphatase 2 (PFKFB2), transcript variant 2, mRNA.	NM_001018053.1	0.75	3.6	1.55	12.17	0.1	0.15	1.13	12.4	1.03	9.24	0.81	3.98
ILMN_1653292	PFKFB4	6-phosphofructo-2-kinase/fructose-2,6-biphosphatase 4 (PFKFB4), mRNA.	NM_004567.2	0.53	1.05	1.02	4.29	-0.47	2.6	1.54	22.92	2.02	29.97	0.48	0.78
ILMN_1713037	PFKL	phosphofructokinase, liver (PFKL), transcript variant 2, mRNA.	NM_002626.4	0.91	2.93	1.06	4.43	1.04	9.27	1.17	12.16	0.12	0.12	0.15	0.07
ILMN_1789944	PGAM5	PREDICTED: phosphoglycerate mutase family member 5 (PGAM5), mRNA.	XM_001126125.1	0.71	3.71	1.46	12.2	0.72	3.71	1.38	13.36	0.66	2.98	0.75	3.91
ILMN_1788254	PGAM5	PREDICTED: phosphoglycerate mutase family member 5 (PGAM5), mRNA.	XM_001126125.1	0.47	0.94	1.23	6.55	0.88	4.71	1.58	14.52	0.7	2.81	0.76	2.37
ILMN_1692651	PHB	prohibitin (PHB), mRNA.	NM_002634.2	0.92	8.21	1.37	15.06	1.06	18.61	1.53	32.8	0.47	4.14	0.46	2.44
ILMN_2183692	PHYHD1	phytanoyl-CoA dioxygenase domain containing 1 (PHYHD1), mRNA.	NM_174933.2	0.02	0.01	1.49	10.54	0.11	0.21	1.38	21.05	1.27	16.5	1.46	9.16
ILMN_1693192	PI3	peptidase inhibitor 3, skin-derived (SKALP) (PI3), mRNA.	NM_002638.2	0.79	1.86	1.33	5.54	1.35	7.54	1.3	7.67	-0.05	0.02	0.54	0.78
ILMN_1743397	PIGW	phosphatidylinositol glycan anchor biosynthesis, class W (PIGW), mRNA.	NM_178517.3	0.68	2.08	1.29	7.22	1.35	6.93	1.81	12.56	0.46	0.7	0.61	1.55
ILMN_2386973	PKP2	plakophilin 2 (PKP2), transcript variant 2a, mRNA.	NM_001005242.1	0.26	0.14	2.02	7.47	0.57	1.13	1.44	7.79	0.87	2.54	1.76	5.18
ILMN_1655341	PLAC8L1	PLAC8-like 1 (PLAC8L1), mRNA.	NM_001029869.1	-0.02	0.01	1.03	4.81	-0.05	0.07	0.98	11.75	1.03	11.14	1.05	4.22
ILMN_1708041	PLEKHF1	pleckstrin homology domain containing, family F (with FYVE domain) member 1 (PLEKHF1), mRNA.	NM_024310.4	0.91	5.41	1.84	15.48	-0.15	0.25	1.12	11.62	1.27	12.51	0.93	5.42
ILMN_2133187	POL3S	polyserase 3 (POL3S), mRNA.	NM_001039503.2	0.6	1.92	1.68	11.65	0.77	4.94	1.64	19.86	0.87	5.98	1.08	5.36
ILMN_1794632	POLR1B	polymerase (RNA) I polypeptide B, 128kDa (POLR1B), mRNA.	NM_019014.3	0.49	0.45	1.62	5.46	0.28	0.56	1.28	11.09	1	6.15	1.13	2.41
ILMN_2067101	POLR1B	polymerase (RNA) I polypeptide B, 128kDa (POLR1B), mRNA.	NM_019014.3	0.19	0.11	1.17	4.29	0.38	0.85	1.58	13.77	1.2	7.41	0.99	2.6
ILMN_1782385	POLR2A	polymerase (RNA) II (DNA directed) polypeptide A, 220kDa (POLR2A), mRNA.	NM_000937.2	0.2	0.32	1.17	9.51	0.15	0.36	1.05	15.32	0.9	10.45	0.96	6.28
ILMN_1657317	POLR2J	polymerase (RNA) II (DNA directed) polypeptide J, 13.3kDa (POLR2J), mRNA.	NM_006234.4	0.5	1.4	1.3	8.78	0.51	2.44	1.47	18.16	0.96	7.76	0.81	3.49
ILMN_1768273	POP1	processing of precursor 1, ribonuclease P/MRP subunit (S. cerevisiae) (POP1), mRNA.	NM_015029.1	0.54	1.99	2.09	17.37	0.81	5.18	2.32	30.63	1.5	14.54	1.56	11.3
ILMN_1798459	PPAN	peter pan homolog (Drosophila) (PPAN), mRNA.	NM_020230.4	0.79	2.07	1.8	9.45	0.52	1.24	1.49	10.39	0.97	4.05	1.02	3.23
ILMN_1674302	PPAT	phosphoribosyl pyrophosphate amidotransferase (PPAT), mRNA.	NM_002703.3	0	0	1.62	7.42	0.74	1.95	1.8	11.58	1.06	3.77	1.62	6.44
ILMN_1806030	PPL	periplakin (PPL), mRNA.	NM_002705.4	-0.39	0.79	0.86	4.46	-0.16	0.29	1	9.44	1.16	10.66	1.25	6.96
ILMN_1784822	PPP1R3F	protein phosphatase 1, regulatory (inhibitor) subunit 3F (PPP1R3F), mRNA.	NM_033215.3	0.56	1.87	1.13	7.29	0.48	2.39	1.18	13.78	0.7	4.66	0.57	1.8
ILMN_1781526	PPP1R8	protein phosphatase 1, regulatory (inhibitor) subunit 8 (PPP1R8), transcript variant 2, mRNA.	NM_138558.1	-0.03	0.01	2.9	18.12	0.29	0.62	2.68	33.95	2.39	26.54	2.93	16.89
ILMN_1683589	PPP2R2D	protein phosphatase 2, regulatory subunit B, delta isoform (PPP2R2D), transcript variant 2, mRNA.	NM_001003656.1	0.12	0.09	1.2	7.04	-0.6	4.12	0.48	3.04	1.09	11.48	1.08	5.12
ILMN_1796210	PPRC1	peroxisome proliferator-activated receptor gamma, coactivator-related 1 (PPRC1), mRNA.	NM_015062.3	0.36	0.97	1.43	12.12	1.15	9.38	2.1	26.16	0.96	6.35	1.07	7.25
ILMN_1656942	PRICKLE3	prickle homolog 3 (Drosophila) (PRICKLE3), mRNA.	NM_006150.3	0.08	0.04	1.34	7.29	0.49	2.51	1.61	22.51	1.12	11.2	1.27	5.73
ILMN_1797531	PRKAG2	protein kinase, AMP-activated, gamma 2 non-catalytic subunit (PRKAG2), transcript variant b, mRNA.	NM_024429.1	0.25	0.56	1.1	9.55	-0.08	0.13	1.02	12.58	1.1	12.48	0.85	5.62
ILMN_2387919	PRKAG2	protein kinase, AMP-activated, gamma 2 non-catalytic subunit (PRKAG2), transcript variant c, mRNA.	NM_001040633.1	0.11	0.12	1.18	10.15	0.12	0.18	1.08	10.66	0.96	7.51	1.07	7.78
ILMN_1748908	PROSC	proline synthetase co-transcribed homolog (bacterial) (PROSC), mRNA.	NM_007198.2	0.49	1.93	1.64	14.41	0.27	0.82	1.13	14	0.87	7.67	1.15	8.15
ILMN_1736021	PRPF4B	PRP4 pre-mRNA processing factor 4 homolog B (yeast) (PRPF4B), transcript variant 1, mRNA.	NM_003913.3	0.12	0.04	1.05	2.46	0.06	0.05	1.11	5.15	1.05	3.89	0.93	1.53
ILMN_1685699	PRSS3	protease, serine, 3 (mesotrypsin) (PRSS3), mRNA.	NM_002771.2	1.67	11.33	1.06	6.73	0.53	2.38	1.32	14.16	0.79	4.93	-0.6	2.07
ILMN_1685312	PSG3	pregnancy specific beta-1-glycoprotein 3 (PSG3), mRNA.	NM_021016.3	1.01	5.57	0.89	5.17	1.02	8.21	0.86	6.62	-0.16	0.16	-0.12	0.08
ILMN_1789887	PSPN	persephin (PSPN), mRNA.	NM_004158.2	0.23	0.22	1.63	9.42	0.37	1.27	1.69	22.64	1.32	13.78	1.4	6.58
ILMN_2345016	PTGES2	prostaglandin E synthase 2 (PTGES2), transcript variant 2, mRNA.	NM_198938.1	0.71	2	1.19	5.88	0.67	4.31	1.12	11.87	0.44	1.75	0.49	0.85
ILMN_2345015	PTGES2	prostaglandin E synthase 2 (PTGES2), transcript variant 2, mRNA.	NM_198938.1	0.61	1.66	1.03	5.05	0.83	4.64	1.32	11.7	0.49	1.46	0.42	0.69
ILMN_1654318	PTPN23	protein tyrosine phosphatase, non-receptor type 23 (PTPN23), mRNA.	NM_015466.1	0.7	1.83	1.29	6.23	0.23	0.78	1.35	21.74	1.12	14.41	0.59	1.18
ILMN_1662658	PUS1	pseudouridylate synthase 1 (PUS1), transcript variant 2, mRNA.	NM_001002019.1	0.33	1.43	1.25	14.09	0.55	3.14	1.36	17.56	0.81	6.36	0.92	8.52
ILMN_2411559	PUS1	pseudouridylate synthase 1 (PUS1), transcript variant 2, mRNA.	NM_001002019.1	0.69	2.79	1.71	12.64	0.91	6.52	1.93	24.14	1.02	7.48	1.02	5.28
ILMN_2337336	PVRL2	poliovirus receptor-related 2 (herpesvirus entry mediator B) (PVRL2), transcript variant delta, mRNA.	NM_001042724.1	0.37	0.47	1.49	7.56	0.42	1.34	1.74	19.77	1.31	11.12	1.12	4.08
ILMN_1718303	PVRL2	poliovirus receptor-related 2 (herpesvirus entry mediator B) (PVRL2), transcript variant alpha, mRNA.	NM_002856.2	0.5	0.99	1.8	10.8	0.37	1.04	1.7	19.3	1.33	11.46	1.3	5.93
ILMN_1796013	PYCR1	pyrroline-5-carboxylate reductase 1 (PYCR1), transcript variant 2, mRNA.	NM_153824.1	1.38	6.98	1.3	7.13	1.07	7.14	1.28	10.69	0.21	0.23	-0.08	0.04
ILMN_2115434	RAB32	RAB32, member RAS oncogene family (RAB32), mRNA.	NM_006834.2	0.61	3.23	1.01	8.36	0.69	3.91	1.56	17.92	0.87	5.7	0.4	1.35
ILMN_1724708	RAB33A	RAB33A, member RAS oncogene family (RAB33A), mRNA.	NM_004794.2	0.46	2.16	1.1	10.39	0.34	1.71	1.18	18.53	0.84	9.31	0.64	3.93
ILMN_2230577	RABGEF1	RAB guanine nucleotide exchange factor (GEF) 1 (RABGEF1), mRNA.	NM_014504.1	0.43	0.92	1.15	6.65	0.41	1.35	1.03	8.97	0.62	2.95	0.72	2.46
ILMN_1830985	RAD51AP2	RAD51-associated protein 2 (RAD51AP2), mRNA.	NM_001099218.2	0.53	2.39	1.75	16	0.69	4.02	2.23	30.19	1.53	15.71	1.22	9.28
ILMN_1757384	RAN	RAN, member RAS oncogene family (RAN), mRNA.	NM_006325.2	0.62	1.05	1.04	3.36	1.07	7.97	0.88	6	-0.2	0.23	0.41	0.38
ILMN_1721457	RANBP1	RAN binding protein 1 (RANBP1), mRNA.	NM_002882.2	0.68	4.02	1.2	10.71	1.43	13.72	1.3	12.61	-0.13	0.11	0.52	2.34
ILMN_1724806	RAPSN	receptor-associated protein of the synapse (RAPSN), transcript variant 1, mRNA.	NM_005055.3	0.01	0	1.41	7.57	0.18	0.26	2.62	31.77	2.44	26.27	1.4	6.49
ILMN_1747673	RASL10A	RAS-like, family 10, member A (RASL10A), transcript variant 2, mRNA.	NM_001007279.1	0.02	0.01	1.4	10.08	0.04	0.05	1.32	17.71	1.29	14.94	1.38	8.77
ILMN_2393573	RASSF1	Ras association (RalGDS/AF-6) domain family member 1 (RASSF1), transcript variant A, mRNA.	NM_007182.4	0.79	3.71	2.11	16.47	0.76	4.71	1.61	18.98	0.85	5.59	1.32	8.31
ILMN_1734205	RASSF1	Ras association (RalGDS/AF-6) domain family 1 (RASSF1), transcript variant B, mRNA.	NM_170712.1	0.91	5.07	1.98	16.01	0.74	6.33	1.65	25.27	0.91	8.55	1.07	6.33
ILMN_1683239	RASSF1	Ras association (RalGDS/AF-6) domain family member 1 (RASSF1), transcript variant C, mRNA.	NM_170713.2	0.53	1.36	1.7	11.21	-0.08	0.09	1.22	12.2	1.3	11.82	1.17	5.71
ILMN_1740716	RBM26	RNA binding motif protein 26 (RBM26), mRNA.	NM_022118.3	-0.22	0.23	0.81	3.44	0.36	1.12	1.52	17.85	1.16	10.01	1.03	4.42
ILMN_1747968	RBM33	RNA binding motif protein 33 (RBM33), transcript variant 1, mRNA.	NM_001008408.3	0.29	0.49	1.29	8.88	-0.23	0.57	1	10.65	1.23	13.14	1	5.17
ILMN_1757439	RBM4	RNA binding motif protein 4 (RBM4), mRNA.	NM_002896.1	0.25	0.27	1.32	7.54	-0.4	1.35	0.67	4.26	1.07	8.64	1.07	4.66
ILMN_1705266	RELA	v-rel reticuloendotheliosis viral oncogene homolog A, nuclear factor of kappa light polypeptide gene enhancer in B-cells 3, p65 (avian) (RELA), mRNA.	NM_021975.2	0.58	0.96	1.13	4.1	0.4	1.13	1.5	15.24	1.1	7.86	0.54	0.76
ILMN_1811258	RELB	v-rel reticuloendotheliosis viral oncogene homolog B, nuclear factor of kappa light polypeptide gene enhancer in B-cells 3 (avian) (RELB), mRNA.	NM_006509.2	0.51	1.24	1.05	5.5	0.49	2.35	1.31	15.87	0.82	6.18	0.53	1.27
ILMN_1762803	RFXDC2	regulatory factor X domain containing 2 (RFXDC2), mRNA.	NM_022841.4	0.26	0.13	2.14	7.93	0.57	1.71	1.77	15.41	1.2	6.84	1.88	5.64
ILMN_2406410	RHBDD2	rhomboid domain containing 2 (RHBDD2), transcript variant 1, mRNA.	NM_001040456.1	0.65	3.04	1.71	14.24	0.4	1.43	1.67	21.09	1.26	12.06	1.05	6.61
ILMN_1809437	RHBDD2	rhomboid domain containing 2 (RHBDD2), transcript variant 1, mRNA.	NM_001040456.1	0.65	2.49	1.74	12.96	0.58	2.88	1.91	24.82	1.33	12.57	1.09	5.96
ILMN_1660864	RHBDL1	rhomboid, veinlet-like 1 (Drosophila) (RHBDL1), mRNA.	NM_003961.1	0.22	0.15	1.62	7.36	-0.15	0.18	1.06	7.2	1.21	7.84	1.39	5
ILMN_1739792	RHOG	ras homolog gene family, member G (rho G) (RHOG), mRNA.	NM_001665.3	0.45	1.16	1.08	6.77	0.81	6.52	1.56	21.07	0.75	5.3	0.63	2.22
ILMN_1698484	RHOV	ras homolog gene family, member V (RHOV), mRNA.	NM_133639.2	0.3	0.18	1.57	5.12	0.71	2.39	1.98	17.11	1.27	7.04	1.28	2.97
ILMN_1801156	RLF	rearranged L-myc fusion (RLF), mRNA.	NM_012421.2	0.06	0.03	1.49	6.06	0.3	0.58	1.86	18.8	1.56	12.53	1.43	4.81
ILMN_1792389	RNF165	ring finger protein 165 (RNF165), mRNA.	NM_152470.2	1.44	3.73	2.55	10.12	0.5	1.16	1.41	9.54	0.91	3.61	1.11	2.16
ILMN_1687941	RNF4	ring finger protein 4 (RNF4), mRNA.	NM_002938.2	0.32	0.79	1.09	8.62	0.33	0.92	1.14	11.08	0.81	5.17	0.77	4.3
ILMN_1725306	RNF6	ring finger protein (C3H2C3 type) 6 (RNF6), transcript variant 1, mRNA.	NM_005977.2	-0.36	0.38	0.87	2.68	-0.64	2.72	0.57	2.52	1.21	8.74	1.24	4.16
ILMN_2375386	RNPS1	RNA binding protein S1, serine-rich domain (RNPS1), transcript variant 2, mRNA.	NM_080594.1	0.37	0.93	1.23	9.39	0.4	1.19	1.33	12.94	0.93	5.97	0.86	4.72
ILMN_1706873	RPL34	ribosomal protein L34 (RPL34), transcript variant 1, mRNA.	NM_000995.2	0.35	0.15	1.88	4.59	0.86	1.72	1.35	4.74	0.49	0.46	1.54	2.65
ILMN_1800796	RPL37	ribosomal protein L37 (RPL37), mRNA.	NM_000997.3	0.8	5.71	2.04	20.26	0.88	6.57	2.03	27.55	1.15	10.15	1.24	10.72
ILMN_1729033	RPL9	ribosomal protein L9 (RPL9), transcript variant 2, mRNA.	NM_001024921.2	0.56	1.53	2.05	14.14	0.06	0.06	1.68	19.91	1.62	16.78	1.49	8.42
ILMN_2298818	RPS29	ribosomal protein S29 (RPS29), transcript variant 2, mRNA.	NM_001030001.1	0.58	1.17	3.35	19.71	0.14	0.2	2.62	33.27	2.48	28.17	2.77	14.94
ILMN_2070072	RPS7	ribosomal protein S7 (RPS7), mRNA.	NM_001011.3	1.26	4.89	2.25	12.47	0.64	2.16	1.17	7.77	0.54	1.39	0.98	3.03
ILMN_1750722	RPS7	ribosomal protein S7 (RPS7), mRNA.	NM_001011.3	1.39	6.53	2.3	14.15	0.4	0.68	1.08	5.27	0.68	1.75	0.91	3.07
ILMN_1767658	RRS1	RRS1 ribosome biogenesis regulator homolog (S. cerevisiae) (RRS1), mRNA.	NM_015169.3	1.13	4.35	1.8	9.94	1.22	9.14	1.77	18.23	0.55	1.83	0.67	1.54
ILMN_1728049	S100A16	S100 calcium binding protein A16 (S100A16), mRNA.	NM_080388.1	0.87	7.84	1.31	14.46	0.69	6.03	1.59	25.9	0.9	9.39	0.43	2.24
ILMN_1688780	S100A4	S100 calcium binding protein A4 (S100A4), transcript variant 2, mRNA.	NM_019554.2	0.99	2.04	1.08	2.86	1.13	3.7	0.62	1.29	-0.51	0.64	0.09	0.03
ILMN_2105177	SAMD8	sterile alpha motif domain containing 8 (SAMD8), mRNA.	NM_144660.1	-0.78	3.83	0.43	1.45	-0.08	0.1	1.09	9.63	1.17	9.49	1.21	7.58
ILMN_1684887	SAMSN1	SAM domain, SH3 domain and nuclear localization signals 1 (SAMSN1), mRNA.	NM_022136.3	-0.02	0.01	1.71	19	-0.13	0.3	1.18	19.23	1.31	20.01	1.72	17.73
ILMN_1752793	SAP18	Sin3A-associated protein, 18kDa (SAP18), mRNA.	NM_005870.3	0.55	0.96	1.65	8.15	0.84	3.71	1.65	13.87	0.81	3.28	1.1	3.61
ILMN_1746265	SARM1	sterile alpha and TIR motif containing 1 (SARM1), mRNA.	NM_015077.2	0.47	1.28	1.83	13.59	0.05	0.07	1.39	21.4	1.34	18.14	1.36	8.22
ILMN_1753342	SAT1	spermidine/spermine N1-acetyltransferase 1 (SAT1), mRNA.	NM_002970.1	0.81	6.35	2.25	23.13	0.7	6.18	1.92	33.14	1.22	15.63	1.44	13.74
ILMN_1703178	SCG2	secretogranin II (chromogranin C) (SCG2), mRNA.	NM_003469.3	0.1	0.08	1.64	13.14	0.15	0.23	1.68	19.02	1.52	14.47	1.54	10.96
ILMN_1655347	SCGB1A1	secretoglobin, family 1A, member 1 (uteroglobin) (SCGB1A1), mRNA.	NM_003357.3	1.83	3.72	2.4	6.59	3.35	25.94	3.05	23.91	-0.3	0.23	0.56	0.3
ILMN_1776653	SCML1	sex comb on midleg-like 1 (Drosophila) (SCML1), transcript variant 1, mRNA.	NM_001037540.1	-0.07	0.04	1.17	5.6	0.45	1.8	1.29	14.17	0.84	5.78	1.24	5.26
ILMN_2340908	SCML1	sex comb on midleg-like 1 (Drosophila) (SCML1), transcript variant 1, mRNA.	NM_001037540.1	-0.03	0.01	1.34	7.2	-0.69	2.77	0.4	1.1	1.09	6.36	1.37	6.42
ILMN_1701621	SCO2	SCO cytochrome oxidase deficient homolog 2 (yeast) (SCO2), nuclear gene encoding mitochondrial protein, mRNA.	NM_005138.1	0.53	2.18	1.3	10.64	0.52	2.52	1.56	19.76	1.04	8.9	0.77	4.12
ILMN_2380850	SDCCAG3	serologically defined colon cancer antigen 3 (SDCCAG3), transcript variant 3, mRNA.	NM_001039708.1	0.47	1.25	1.18	7.62	0.19	0.61	1	14.95	0.81	9.11	0.71	2.76
ILMN_1762003	SEC62	SEC62 homolog (S. cerevisiae) (SEC62), mRNA.	NM_003262.3	1.06	6.53	1.15	8.26	0.94	11.27	1.18	17.79	0.25	0.74	0.09	0.06
ILMN_1746368	SELT	selenoprotein T (SELT), mRNA.	NM_016275.3	0.2	0.26	1.01	6.97	-0.02	0.02	1.02	7.66	1.04	6.8	0.81	4.18
ILMN_2150856	SERPINB2	serpin peptidase inhibitor, clade B (ovalbumin), member 2 (SERPINB2), mRNA.	NM_002575.1	1.66	5.51	2.18	9.23	1.5	6.86	1.99	12.25	0.49	0.63	0.52	0.5
ILMN_1762605	SERPINC1	serpin peptidase inhibitor, clade C (antithrombin), member 1 (SERPINC1), mRNA.	NM_000488.2	0.13	0.16	2.22	20.3	0.04	0.06	2.16	39.68	2.12	35.56	2.09	17.73
ILMN_1714327	SETD1A	SET domain containing 1A (SETD1A), mRNA.	NM_014712.1	0.18	0.1	1.26	4.69	-0.17	0.29	1.03	9.39	1.2	10.6	1.08	2.99
ILMN_1813573	SETD1B	PREDICTED: SET domain containing 1B (SETD1B), mRNA.	XM_037523.12	-0.27	0.3	1.01	4.77	-0.03	0.03	1.24	14.43	1.27	13.14	1.27	5.99
ILMN_1769473	SETD2	SET domain containing 2 (SETD2), mRNA.	NM_014159.4	0.19	0.37	1.21	12.18	-0.24	0.65	0.79	7.41	1.02	10.22	1.02	8.69
ILMN_1754220	SF3A2	splicing factor 3a, subunit 2, 66kDa (SF3A2), mRNA.	NM_007165.4	0.23	0.19	1.03	4.07	0.57	2.31	1.16	9.86	0.59	2.33	0.79	2.07
ILMN_1806607	SFN	stratifin (SFN), mRNA.	NM_006142.3	1.05	6.35	0.37	1.12	1.09	12.16	1.5	21.59	0.41	1.77	-0.68	2.87
ILMN_1689007	SFRS14	splicing factor, arginine/serine-rich 14 (SFRS14), transcript variant 1, mRNA.	NM_001017392.2	0.31	0.24	1.13	3.74	-0.06	0.07	1.01	8.3	1.08	8.02	0.82	1.64
ILMN_2363361	SFXN4	sideroflexin 4 (SFXN4), transcript variant 3, mRNA.	NM_213650.1	0.66	2.53	1.14	7.24	1.1	10.3	0.83	6.74	-0.27	0.57	0.48	1.21
ILMN_1772466	SH2D3A	SH2 domain containing 3A (SH2D3A), mRNA.	NM_005490.1	0.88	3.22	1.65	9.87	0.33	1.03	1.26	14.01	0.92	7.14	0.77	2.42
ILMN_2216918	SHPK	sedoheptulokinase (SHPK), mRNA.	NM_013276.2	0.19	0.51	1.05	12.01	-0.47	2.88	0.74	7.53	1.21	15.27	0.86	8.12
ILMN_1801313	SIAH2	seven in absentia homolog 2 (Drosophila) (SIAH2), mRNA.	NM_005067.5	0.47	1.02	1.03	5.41	0.02	0.03	1.02	10.31	0.99	8.58	0.57	1.45
ILMN_2077858	SIRT7	sirtuin (silent mating type information regulation 2 homolog) 7 (S. cerevisiae) (SIRT7), mRNA.	NM_016538.1	0.28	0.42	1.5	10.17	-0.22	0.54	0.91	9.49	1.13	11.89	1.22	6.6
ILMN_1679731	SLC15A4	solute carrier family 15, member 4 (SLC15A4), mRNA.	NM_145648.2	0.64	2.6	1.03	6.71	0.18	0.38	1.08	11.59	0.89	7.23	0.39	0.87
ILMN_1813763	SLC20A2	solute carrier family 20 (phosphate transporter), member 2 (SLC20A2), mRNA.	NM_006749.3	0.62	2.35	1.54	11.41	0.69	5.59	1.58	24.24	0.9	8.53	0.92	4.63
ILMN_1789001	SLC35B2	solute carrier family 35, member B2 (SLC35B2), mRNA.	NM_178148.1	1.08	8.44	1.12	9.79	0.99	10.96	1.18	15.95	0.2	0.38	0.03	0.02
ILMN_1695058	SLC38A5	solute carrier family 38, member 5 (SLC38A5), mRNA.	NM_033518.1	1.01	2.47	0.32	0.33	1.29	7.71	1.04	5.67	-0.25	0.24	-0.69	1.06
ILMN_2116714	SLC39A1	solute carrier family 39 (zinc transporter), member 1 (SLC39A1), mRNA.	NM_014437.3	1.4	9.24	1.94	15.12	1.35	4.98	1.77	8.96	0.42	0.38	0.54	1.7
ILMN_1692049	SLC7A6OS	solute carrier family 7, member 6 opposite strand (SLC7A6OS), mRNA.	NM_032178.1	0.22	0.24	1.23	7.37	-0.84	4.83	0.28	0.67	1.13	7.81	1.01	4.62
ILMN_1714023	SLC9A5	solute carrier family 9 (sodium/hydrogen exchanger), member 5 (SLC9A5), mRNA.	NM_004594.1	0.86	3.52	2.02	13.73	0.36	1.1	1.87	24.28	1.51	15.72	1.15	5.57
ILMN_1706261	SLCO3A1	PREDICTED: solute carrier organic anion transporter family, member 3A1, transcript variant 2 (SLCO3A1), mRNA.	XM_941061.1	0.49	1.29	1.34	8.73	0.33	0.94	1.76	21.93	1.42	14.06	0.85	3.61
ILMN_1678928	SLCO3A1	solute carrier organic anion transporter family, member 3A1 (SLCO3A1), mRNA.	NM_013272.2	0.58	2.35	1.28	9.73	0.12	0.18	1.56	20.37	1.45	16.08	0.7	3.17
ILMN_1692684	SMARCD2	SWI/SNF related, matrix associated, actin dependent regulator of chromatin, subfamily d, member 2 (SMARCD2), mRNA.	NM_003077.2	0.74	2.22	1.06	4.87	0.71	3.81	1.06	8.87	0.35	0.8	0.32	0.33
ILMN_1793203	SMCR7L	Smith-Magenis syndrome chromosome region, candidate 7-like (SMCR7L), mRNA.	NM_019008.4	0.12	0.13	1.54	14.1	-0.04	0.07	1.16	21.78	1.2	20.47	1.43	11.61
ILMN_2367258	SMOX	spermine oxidase (SMOX), transcript variant 2, mRNA.	NM_175840.1	1.21	3.64	1	2.95	0.62	2.33	1.45	12.66	0.83	3.99	-0.22	0.1
ILMN_1669210	SNORD16	small nucleolar RNA, C/D box 16 (SNORD16) on chromosome 15.	NR_002440.1	0.32	0.33	2	10.77	0.22	0.32	2.12	21.76	1.9	16.47	1.68	7.46
ILMN_1784328	SNORD25	small nucleolar RNA, C/D box 25 (SNORD25) on chromosome 11.	NR_002565.1	0.05	0.03	2.2	13.5	-0.14	0.19	2	22.97	2.14	22.71	2.15	11.87
ILMN_1694367	SNORD35B	small nucleolar RNA, C/D box 35B (SNORD35B) on chromosome 19.	NR_001285.1	0.55	1.04	1.39	6.7	0.24	0.45	1.53	15.51	1.29	10.2	0.84	2.33
ILMN_1766770	SNX31	sorting nexin 31 (SNX31), mRNA.	NM_152628.2	-0.11	0.13	0.94	8.24	0.06	0.09	1	12.54	0.94	9.85	1.05	8.45
ILMN_1709772	SNX5	sorting nexin 5 (SNX5), transcript variant 2, mRNA.	NM_014426.2	0.4	0.67	1.08	5.28	1.25	9.48	0.97	6.65	-0.27	0.38	0.67	1.85
ILMN_1805466	SOX9	SRY (sex determining region Y)-box 9 (campomelic dysplasia, autosomal sex-reversal) (SOX9), mRNA.	NM_000346.2	1.87	6.04	1.59	5.23	1.29	7.82	1.4	9.77	0.11	0.06	-0.28	0.13
ILMN_1696392	SPDYA	speedy homolog A (Drosophila) (SPDYA), transcript variant 2, mRNA.	NM_182756.2	-0.47	1.6	1.1	8.2	0.12	0.2	1.22	14.64	1.1	10.79	1.57	11.75
ILMN_1781221	SPDYA	speedy homolog A (Drosophila) (SPDYA), transcript variant 2, mRNA.	NM_182756.2	-0.25	0.28	2.12	14.21	-0.11	0.14	1.82	22.63	1.93	22.03	2.37	14.67
ILMN_1802611	SPEN	spen homolog, transcriptional regulator (Drosophila) (SPEN), mRNA.	NM_015001.2	-0.03	0.02	1.13	11.51	-0.02	0.02	1.01	13.53	1.03	12.18	1.15	10.65
ILMN_1675583	SPG7	spastic paraplegia 7 (pure and complicated autosomal recessive) (SPG7), nuclear gene encoding mitochondrial protein, transcript variant 2, mRNA.	NM_199367.1	0.22	0.33	1.44	11.44	0.01	0.01	1.41	19.97	1.4	17.62	1.22	8.11
ILMN_1656287	SPOCK2	sparc/osteonectin, cwcv and kazal-like domains proteoglycan (testican) 2 (SPOCK2), mRNA.	NM_014767.1	-0.54	1.58	1.12	6.72	-0.26	0.52	1	7.96	1.26	10.29	1.66	10.39
ILMN_1791232	SPRED2	sprouty-related, EVH1 domain containing 2 (SPRED2), mRNA.	NM_181784.1	0.27	0.52	1.14	8.61	0.29	0.8	1.28	14.35	0.99	8	0.87	4.87
ILMN_1716591	SPRR1A	small proline-rich protein 1A (SPRR1A), mRNA.	NM_005987.2	2.47	9.34	1.82	6.71	1.12	8.35	1.7	18.09	0.58	2.2	-0.66	0.79
ILMN_1661337	SRM	spermidine synthase (SRM), mRNA.	NM_003132.2	0.49	0.66	1.68	7.63	1.42	11.06	1.86	18.4	0.44	1	1.19	3.71
ILMN_1785037	SSR2	PREDICTED: signal sequence receptor, beta (translocon-associated protein beta), transcript variant 4 (SSR2), mRNA.	XM_945430.1	0.31	0.32	1.1	4.66	-0.21	0.26	0.85	4.01	1.06	5.14	0.8	2.12
ILMN_1774127	STAC	SH3 and cysteine rich domain (STAC), mRNA.	NM_003149.1	-0.04	0.02	1.21	7.1	0.92	5.82	1.11	8.95	0.19	0.2	1.25	6.46
ILMN_1785202	STAT4	signal transducer and activator of transcription 4 (STAT4), mRNA.	NM_003151.2	0.39	1.22	1.76	15.56	0.27	0.92	1.57	25.35	1.3	17.22	1.37	10.39
ILMN_1789510	STIP1	stress-induced-phosphoprotein 1 (Hsp70/Hsp90-organizing protein) (STIP1), mRNA.	NM_006819.1	0.44	0.72	1.05	4.64	0.54	3.33	1.32	17.68	0.77	6.21	0.61	1.34
ILMN_1760160	STX1A	syntaxin 1A (brain) (STX1A), mRNA.	NM_004603.1	0.18	0.1	1.21	4.35	-0.4	1.29	0.63	3.58	1.03	7.69	1.03	2.71
ILMN_1703866	SUPT5H	suppressor of Ty 5 homolog (S. cerevisiae) (SUPT5H), mRNA.	NM_003169.2	0.61	1.55	1.36	7.41	0.14	0.24	1.25	13.78	1.11	9.81	0.75	2.22
ILMN_1758087	TAOK1	TAO kinase 1 (TAOK1), mRNA.	NM_020791.1	1.17	1.16	1.99	3.79	0.82	1.46	1.52	5.58	0.7	0.95	0.81	0.47
ILMN_1710434	TBC1D10C	TBC1 domain family, member 10C (TBC1D10C), mRNA.	NM_198517.2	-0.08	0.07	1.06	7.8	0.02	0.03	1.25	17.84	1.23	15.32	1.14	7.61
ILMN_1769876	TBC1D2	TBC1 domain family, member 2 (TBC1D2), mRNA.	NM_018421.2	0.34	1.34	1.09	10.85	-0.06	0.08	1.22	17.45	1.28	16.57	0.74	5.41
ILMN_2044572	TBC1D20	TBC1 domain family, member 20 (TBC1D20), mRNA.	NM_144628.2	0.39	1.6	1.13	10.81	0.08	0.11	1.45	17.8	1.37	14.36	0.74	5
ILMN_2153679	TBC1D3B	TBC1 domain family, member 3B (TBC1D3B), mRNA.	NM_001001417.4	0.55	0.52	1.63	5.2	0.31	0.5	1.25	8.15	0.94	4.12	1.09	2.06
ILMN_1693802	TBC1D3C	TBC1 domain family, member 3C (TBC1D3C), mRNA.	NM_001001418.2	0.47	0.38	1.42	4.07	0.09	0.08	1.15	6.49	1.06	4.74	0.95	1.54
ILMN_2068991	TBC1D3G	TBC1 domain family, member 3G (TBC1D3G), mRNA.	NM_001040282.1	0.45	0.34	1.41	3.88	0.08	0.08	1.05	6.46	0.97	4.72	0.96	1.49
ILMN_2414848	TBRG4	transforming growth factor beta regulator 4 (TBRG4), transcript variant 2, mRNA.	NM_030900.2	0.71	1.88	1.17	5.37	0.64	4.35	1.08	12.21	0.44	1.88	0.46	0.69
ILMN_1809047	TBRG4	transforming growth factor beta regulator 4 (TBRG4), transcript variant 1, mRNA.	NM_004749.2	0.68	1.65	1.42	7.04	0.56	2.03	1.09	8.1	0.53	1.66	0.74	1.85
ILMN_2048119	TBX19	T-box 19 (TBX19), mRNA.	NM_005149.1	0.23	0.32	1.36	10.05	-0.1	0.2	1.28	19.15	1.39	19.2	1.14	6.8
ILMN_1783563	TBX19	T-box 19 (TBX19), mRNA.	NM_005149.1	0.33	0.66	1.75	13.5	-0.5	2.49	1.28	15.12	1.78	22.39	1.42	9.25
ILMN_2398039	TCERG1	transcription elongation regulator 1 (TCERG1), transcript variant 1, mRNA.	NM_006706.3	0.49	1.48	1.3	9.25	0.6	3.42	1.57	20.03	0.97	7.86	0.81	3.78
ILMN_1768469	TCN1	transcobalamin I (vitamin B12 binding protein, R binder family) (TCN1), mRNA.	NM_001062.3	1.18	1.89	1.96	5.51	2.58	16.28	1.97	11.3	-0.61	0.94	0.79	0.75
ILMN_1706511	TEF	thyrotrophic embryonic factor (TEF), mRNA.	NM_003216.2	0.28	0.21	1.3	5.03	0.3	0.75	1.53	16.89	1.22	10.26	1.02	2.74
ILMN_1768488	TERF2	telomeric repeat binding factor 2 (TERF2), mRNA.	NM_005652.2	0.11	0.14	1.4	14	0.35	1.71	1.26	19.57	0.91	10.16	1.29	11.44
ILMN_1805175	TGFA	transforming growth factor, alpha (TGFA), transcript variant 2, mRNA.	NM_001099691.1	0.52	1.23	1.5	9.18	-0.03	0.03	1.35	12.04	1.38	10.89	0.98	4.07
ILMN_2083946	TGFA	transforming growth factor, alpha (TGFA), mRNA.	NM_003236.1	0.06	0.03	1.02	4.01	0.21	0.39	1.43	15.78	1.22	10.7	0.97	3
ILMN_1724863	TICAM1	toll-like receptor adaptor molecule 1 (TICAM1), transcript variant 2, mRNA.	NM_182919.1	0.36	0.51	1.02	4.63	-0.07	0.11	1.35	18.78	1.42	18.05	0.66	1.67
ILMN_1651346	TICAM2	toll-like receptor adaptor molecule 2 (TICAM2), mRNA.	NM_021649.3	-0.09	0.09	1.67	15.63	-0.48	3.28	1.74	30.49	2.22	37.88	1.76	15.14
ILMN_1784031	TIMM44	translocase of inner mitochondrial membrane 44 homolog (yeast) (TIMM44), nuclear gene encoding mitochondrial protein, mRNA.	NM_006351.2	0.81	2.85	1.73	10.75	0.5	2.81	1.23	15.83	0.73	5.53	0.92	3.48
ILMN_1653709	TIMM9	translocase of inner mitochondrial membrane 9 homolog (yeast) (TIMM9), nuclear gene encoding mitochondrial protein, mRNA.	NM_012460.2	0.11	0.08	1.11	6.51	0.69	2.48	1.41	10.56	0.72	2.55	0.99	4.66
ILMN_1748899	TMED6	transmembrane emp24 protein transport domain containing 6 (TMED6), mRNA.	NM_144676.2	0.25	0.35	1.35	9.22	-0.01	0.01	1.45	16.03	1.46	14.24	1.1	5.9
ILMN_2175265	TMEM11	transmembrane protein 11 (TMEM11), mRNA.	NM_003876.1	0.38	0.46	1.01	3.79	0.62	3.25	1.49	17.06	0.87	5.86	0.63	1.2
ILMN_1728009	TMEM171	transmembrane protein 171 (TMEM171), mRNA.	NM_173490.5	0.82	3.19	1.11	6.14	0.46	1.17	1.69	14.9	1.22	7.5	0.3	0.35
ILMN_1710312	TMEM31	transmembrane protein 31 (TMEM31), mRNA.	NM_182541.2	-0.51	1.63	0.69	3.41	-0.22	0.34	0.86	4.82	1.08	6.31	1.2	7.25
ILMN_1757391	TMEM50B	transmembrane protein 50B (TMEM50B), mRNA.	NM_006134.4	0.32	0.7	1.31	10.27	-0.12	0.22	0.99	10.69	1.11	11.4	0.99	5.99
ILMN_1674985	TMEM51	transmembrane protein 51 (TMEM51), mRNA.	NM_018022.1	0.24	0.43	1.32	10.72	0.06	0.09	1.24	19.94	1.18	16.53	1.07	7.07
ILMN_2049417	TMEM86B	transmembrane protein 86B (TMEM86B), mRNA.	NM_173804.3	0.9	3.64	2.66	18.1	0.57	2.86	2.36	33.46	1.79	20.68	1.77	10.28
ILMN_1794560	TMEM93	transmembrane protein 93 (TMEM93), transcript variant 1, mRNA.	NM_001014764.1	0.19	0.14	1.76	9.39	-0.49	1.68	1.66	17.54	2.15	23.06	1.57	6.95
ILMN_1727689	TNFAIP2	tumor necrosis factor, alpha-induced protein 2 (TNFAIP2), mRNA.	NM_006291.2	0.22	0.12	1.47	5.18	1.08	5.25	0.7	2.51	-0.38	0.56	1.25	3.27
ILMN_1721316	TNFRSF10A	tumor necrosis factor receptor superfamily, member 10a (TNFRSF10A), mRNA.	NM_003844.2	0.48	0.56	1.9	8.4	0.39	0.65	1.95	14.67	1.56	8.74	1.42	4.6
ILMN_1758418	TNFSF13B	tumor necrosis factor (ligand) superfamily, member 13b (TNFSF13B), mRNA.	NM_006573.3	-0.35	1.21	2.25	21.96	-0.59	5.31	1.65	30.19	2.24	40.24	2.6	23.29
ILMN_2066858	TNFSF13B	tumor necrosis factor (ligand) superfamily, member 13b (TNFSF13B), mRNA.	NM_006573.3	-0.65	2.15	1.47	9.48	-0.76	5.55	1.61	21.65	2.37	33.09	2.12	13.53
ILMN_1751464	TNFSF9	tumor necrosis factor (ligand) superfamily, member 9 (TNFSF9), mRNA.	NM_003811.2	0.48	1.38	1.02	6.45	0.15	0.23	1.09	9.56	0.94	6.3	0.55	1.73
ILMN_1655068	TOM1L2	target of myb1-like 2 (chicken) (TOM1L2), transcript variant 3, mRNA.	NM_001082968.1	-0.35	0.94	0.87	6.29	-0.67	5.03	0.51	3.31	1.18	13.08	1.22	8.99
ILMN_1683475	TOMM40	translocase of outer mitochondrial membrane 40 homolog (yeast) (TOMM40), nuclear gene encoding mitochondrial protein, mRNA.	NM_006114.1	0.55	2.35	1.36	11.27	1.24	14.38	1.89	28.56	0.65	4.18	0.81	4.49
ILMN_1740185	TPMT	thiopurine S-methyltransferase (TPMT), mRNA.	NM_000367.2	0.76	5.17	1.63	16	0.29	1.24	1.6	28.83	1.31	19.54	0.87	6.21
ILMN_1792076	TRERF1	transcriptional regulating factor 1 (TRERF1), mRNA.	NM_033502.1	0.81	5.52	1.46	13.72	0.44	2.11	1.04	11.86	0.6	3.76	0.65	3.58
ILMN_2339234	TRIM16	tripartite motif-containing 16 (TRIM16), mRNA.	NM_006470.3	0.36	0.35	1.87	9.01	-0.07	0.07	1.54	14.17	1.61	13.43	1.51	5.69
ILMN_1661220	TRIM16	tripartite motif-containing 16 (TRIM16), mRNA.	NM_006470.3	0.13	0.08	1.68	9.06	-0.29	0.48	1.21	7.95	1.51	10.11	1.54	7.02
ILMN_1738704	TRIM26	tripartite motif-containing 26 (TRIM26), mRNA.	NM_003449.3	-0.21	0.25	0.79	4.05	0.24	0.54	1.03	9.99	0.8	5.38	1	5.11
ILMN_1706265	TRIM61	tripartite motif-containing 61 (TRIM61), mRNA.	NM_001012414.1	0.43	0.29	2.27	7.76	0.29	0.36	1.65	10.63	1.37	6.56	1.84	4.8
ILMN_1813430	TRIM69	tripartite motif-containing 69 (TRIM69), transcript variant a, mRNA.	NM_182985.3	0.08	0.07	1.05	8.07	0.08	0.16	1.03	17.43	0.96	13.61	0.97	6.18
ILMN_1657509	TSEN54	tRNA splicing endonuclease 54 homolog (S. cerevisiae) (TSEN54), mRNA.	NM_207346.2	0.71	2.71	1.75	12.4	0.47	2.19	1.06	11.23	0.59	3.25	1.04	5.14
ILMN_1723381	TSSK4	testis-specific serine kinase 4 (TSSK4), mRNA.	NM_174944.2	-0.09	0.07	1.47	11.66	-0.05	0.07	1.24	18.86	1.29	17.79	1.56	11.25
ILMN_1697777	TSTA3	tissue specific transplantation antigen P35B (TSTA3), mRNA.	NM_003313.2	0.67	1.1	1.28	4.46	1.35	12.43	2.26	28.85	0.91	5.78	0.61	0.83
ILMN_1781121	TWISTNB	TWIST neighbor (TWISTNB), mRNA.	NM_001002926.1	0.3	0.25	1.33	5.19	0.82	2.82	1.59	10.7	0.77	2.32	1.03	2.76
ILMN_1814789	UBAP2L	ubiquitin associated protein 2-like (UBAP2L), mRNA.	NM_014847.2	0.23	0.37	1.03	7.62	0.72	4.78	1.09	11.2	0.38	1.18	0.8	4.38
ILMN_1677877	UBE2L3	ubiquitin-conjugating enzyme E2L 3 (UBE2L3), transcript variant 2, mRNA.	NM_198157.1	0.79	5.27	1.27	11.64	0.44	1.93	1.28	15.57	0.84	6.6	0.48	2.03
ILMN_1742147	UBL4A	ubiquitin-like 4A (UBL4A), mRNA.	NM_014235.3	0.88	4.07	2.07	15.17	1.06	8.21	1.64	18.39	0.58	2.44	1.19	6.45
ILMN_1719785	UCK1	uridine-cytidine kinase 1 (UCK1), mRNA.	NM_031432.1	0.48	1.12	1.41	8.91	0.25	0.71	1.1	12.84	0.85	7.06	0.93	4
ILMN_2084073	UCN	urocortin (UCN), mRNA.	NM_003353.2	0.09	0.06	1.68	10.47	0.14	0.2	2.01	24.3	1.87	19.59	1.59	8.57
ILMN_1652413	UCN2	urocortin 2 (UCN2), mRNA.	NM_033199.3	1.76	7.17	1.48	6.14	0.79	5.01	1	8.49	0.21	0.28	-0.29	0.18
ILMN_1665737	UFD1L	ubiquitin fusion degradation 1 like (yeast) (UFD1L), transcript variant 2, mRNA.	NM_001035247.1	0.55	2.74	1.16	10.23	0.39	2.02	1.02	13.76	0.64	5.14	0.61	3.17
ILMN_1771601	UFSP1	UFM1-specific peptidase 1 (non-functional) (UFSP1), mRNA.	NM_001015072.3	-0.15	0.13	0.94	5.28	0.47	1.8	1.71	20.49	1.24	10.75	1.09	5.73
ILMN_1774265	UNQ830	ASCL830 (UNQ830), mRNA.	NM_206895.1	0.28	0.6	2.81	24.03	-0.2	0.5	2.56	43.03	2.76	43.21	2.53	20.44
ILMN_1655637	UPK1A	uroplakin 1A (UPK1A), mRNA.	NM_007000.2	0.18	0.19	2.02	15.55	0.2	0.42	2.2	31.71	1.99	25.26	1.85	12.72
ILMN_1773313	USMG5	upregulated during skeletal muscle growth 5 homolog (mouse) (USMG5), mRNA.	NM_032747.2	0.43	0.55	3.45	19.07	0.18	0.3	3.25	43.81	3.07	37.78	3.02	15.33
ILMN_1697227	USP36	ubiquitin specific peptidase 36 (USP36), mRNA.	NM_025090.2	0.27	0.73	2.6	25.63	-0.2	0.5	2.2	36.01	2.4	36.77	2.34	21.92
ILMN_1809467	VAMP5	vesicle-associated membrane protein 5 (myobrevin) (VAMP5), mRNA.	NM_006634.2	0.51	0.82	2.59	14.66	0	0	2.35	25.35	2.34	22.77	2.08	10.13
ILMN_1795937	VIL2	villin 2 (ezrin) (VIL2), mRNA.	NM_003379.3	0.6	3.8	1.25	12.46	0.25	1.01	1.01	15.7	0.76	8.52	0.64	4.05
ILMN_1700147	VPREB3	pre-B lymphocyte gene 3 (VPREB3), mRNA.	NM_013378.1	0.14	0.12	1.94	13.82	0.22	0.66	2.25	40.33	2.03	32.62	1.8	11.37
ILMN_1721575	VPS18	vacuolar protein sorting 18 homolog (S. cerevisiae) (VPS18), mRNA.	NM_020857.2	0.65	0.93	1.13	3.36	0.29	0.53	1.6	14.66	1.32	9.18	0.49	0.46
ILMN_1710427	VPS37B	vacuolar protein sorting 37 homolog B (S. cerevisiae) (VPS37B), mRNA.	NM_024667.1	0.67	1.79	1.23	6.16	0.48	2.38	1.45	19.12	0.97	8.6	0.56	1.16
ILMN_2151114	VSNL1	visinin-like 1 (VSNL1), mRNA.	NM_003385.4	0.97	3.37	1.94	11.09	0.81	4.25	1.96	21.16	1.15	7.7	0.97	3.25
ILMN_1676413	VSNL1	visinin-like 1 (VSNL1), mRNA.	NM_003385.4	1.74	12.97	3.41	26.48	0.72	5.84	2	32.3	1.28	15.23	1.67	12.18
ILMN_1760315	VWCE	von Willebrand factor C and EGF domains (VWCE), mRNA.	NM_152718.2	0.09	0.07	1.17	8.7	0.07	0.1	1.06	12.47	0.99	9.69	1.08	6.75
ILMN_1810797	WASF3	WAS protein family, member 3 (WASF3), mRNA.	NM_006646.4	0.12	0.11	1.12	8.43	-0.09	0.12	0.96	8.79	1.05	8.85	1	6.2
ILMN_1707199	WDR20	WD repeat domain 20 (WDR20), transcript variant 1, mRNA.	NM_181291.1	0.11	0.17	1.58	17.83	-0.43	2.46	1.23	17.93	1.67	25.05	1.47	15.14
ILMN_1671442	WDR43	PREDICTED: WD repeat domain 43, transcript variant 8 (WDR43), mRNA.	XM_944889.1	0.27	0.29	1.82	11.13	0.34	0.75	2.2	24.34	1.86	16.88	1.55	7.91
ILMN_1685763	WDR45L	WDR45-like (WDR45L), mRNA.	NM_019613.2	0.53	1.46	1.29	7.97	-0.34	1.33	0.88	9.48	1.22	14.31	0.75	2.76
ILMN_2212354	WDR46	WD repeat domain 46 (WDR46), mRNA.	NM_005452.4	0.74	2.25	1.4	7.73	0.77	5.41	1.55	19.36	0.78	5.16	0.67	1.75
ILMN_1706706	WDR68	WD repeat domain 68 (WDR68), transcript variant 2, mRNA.	NM_001003725.1	-0.27	0.59	1.52	13.66	-0.28	1.01	1.51	24.52	1.79	27.95	1.78	14.99
ILMN_1809866	WDR74	PREDICTED: WD repeat domain 74 (WDR74), mRNA.	XM_001125771.1	0.76	4.73	1.38	12.39	0.84	6.47	1.27	14.49	0.43	1.62	0.61	3.09
ILMN_1789775	WDR74	PREDICTED: WD repeat domain 74 (WDR74), mRNA.	XM_001125771.1	0.78	2.52	1.28	6.78	0.78	3.86	1.6	15.3	0.82	4.01	0.5	0.96
ILMN_1809601	WFIKKN1	WAP, follistatin/kazal, immunoglobulin, kunitz and netrin domain containing 1 (WFIKKN1), mRNA.	NM_053284.2	0.05	0.02	1.11	3.88	-0.18	0.33	1.13	10.7	1.32	12.05	1.05	2.94
ILMN_1697919	WHSC1L1	Wolf-Hirschhorn syndrome candidate 1-like 1 (WHSC1L1), transcript variant short, mRNA.	NM_017778.2	0.37	0.75	1.28	8.47	0.68	4.43	1.13	12.3	0.46	1.88	0.91	4.25
ILMN_2365465	XBP1	X-box binding protein 1 (XBP1), transcript variant 2, mRNA.	NM_001079539.1	0.96	5.29	1.27	9	0.6	3.12	2.09	28.46	1.49	15.48	0.31	0.5
ILMN_1809433	XBP1	X-box binding protein 1 (XBP1), transcript variant 1, mRNA.	NM_005080.2	1.14	5.28	1.44	8.41	0.92	8.02	2.3	34.95	1.38	15.17	0.3	0.31
ILMN_1755235	XPO6	exportin 6 (XPO6), mRNA.	NM_015171.2	0.28	0.54	1.1	7.96	-0.04	0.05	1.04	13.37	1.08	12.47	0.82	4.26
ILMN_1678919	YOD1	YOD1 OTU deubiquinating enzyme 1 homolog (S. cerevisiae) (YOD1), mRNA.	NM_018566.3	0.34	0.15	1.47	2.99	0.48	1.04	1.97	16.51	1.49	9.1	1.13	1.41
ILMN_1711048	ZBTB17	zinc finger and BTB domain containing 17 (ZBTB17), mRNA.	NM_003443.1	0.54	1.48	1.46	9.34	-0.01	0.01	1.08	11.1	1.09	9.78	0.91	3.86
ILMN_1814113	ZFR	zinc finger RNA binding protein (ZFR), mRNA.	NM_016107.3	-0.45	1.02	0.65	2.53	0.83	4.27	1.86	18.96	1.03	6.04	1.1	5.37
ILMN_1757627	ZMYND19	zinc finger, MYND-type containing 19 (ZMYND19), mRNA.	NM_138462.2	1.54	8.89	2.45	17.08	1.22	4.06	2.21	13.01	0.99	2.5	0.92	3.79
ILMN_1674399	ZNF143	zinc finger protein 143 (ZNF143), mRNA.	NM_003442.4	0.17	0.23	1.13	9.2	0.17	0.37	1.02	11.54	0.85	7.26	0.96	6.31
ILMN_1680347	ZNF317	zinc finger protein 317 (ZNF317), mRNA.	NM_020933.2	0.22	0.4	1.29	11.36	0.09	0.13	1.09	10.97	1	8.15	1.07	7.78
ILMN_1693242	ZNF342	zinc finger protein 342 (ZNF342), mRNA.	NM_145288.1	0.6	1.94	2.03	14.66	-0.21	0.54	1.42	19.83	1.63	21.81	1.43	8.41
ILMN_1764891	ZNF384	zinc finger protein 384 (ZNF384), transcript variant 2, mRNA.	NM_133476.3	0.32	0.37	1.07	4.79	0.33	0.82	1.02	8.2	0.69	3.36	0.75	2.09
ILMN_1786722	ZNF385A	zinc finger protein 385A (ZNF385A), mRNA.	NM_015481.1	0.74	1.04	1.2	3.27	0.47	1.52	1.32	11.75	0.84	4.52	0.47	0.35
ILMN_1683932	ZNF425	zinc finger protein 425 (ZNF425), mRNA.	NM_001001661.1	0.36	0.61	1.39	8.81	0.2	0.31	1.12	8.33	0.92	4.96	1.04	4.82
ILMN_1703441	ZNF593	zinc finger protein 593 (ZNF593), mRNA.	NM_015871.3	0.36	1.37	1.01	9.42	0.51	2.26	1.62	19.85	1.11	9.4	0.65	4.08
ILMN_2075820	ZNF598	zinc finger protein 598 (ZNF598), mRNA.	NM_178167.2	0.45	0.64	1.05	3.98	0.18	0.29	1.13	9.35	0.95	5.85	0.6	1.05
ILMN_1700583	ZNF750	zinc finger protein 750 (ZNF750), mRNA.	NM_024702.2	1.72	8.6	1.17	5.4	0.8	8.67	1.1	15.86	0.29	1.09	-0.55	1.04
ILMN_1653618	ZZZ3	zinc finger, ZZ-type containing 3 (ZZZ3), mRNA.	NM_015534.4	0.13	0.08	1.3	6.1	0.24	0.54	1.2	12.89	0.96	7.65	1.17	4.34
ILMN_2404407	ABAT	4-aminobutyrate aminotransferase (ABAT), nuclear gene encoding mitochondrial protein, transcript variant 2, mRNA.	NM_000663.3	-1.02	4.61	-1.48	9.15	-0.54	2.04	-1	7.47	-0.46	1.34	-0.46	0.91
ILMN_1651964	ABCC5	ATP-binding cassette, sub-family C (CFTR/MRP), member 5 (ABCC5), transcript variant 2, mRNA.	NM_001023587.1	-0.93	4.74	-2.07	15.7	-0.43	1.36	-2.39	30.18	-1.95	20.54	-1.14	6.32
ILMN_2329927	ABCG1	ATP-binding cassette, sub-family G (WHITE), member 1 (ABCG1), transcript variant 2, mRNA.	NM_016818.2	-0.34	0.75	-1.54	12.07	-0.85	7.25	-1.67	23.54	-0.82	6.35	-1.2	7.63
ILMN_1801767	ABHD3	abhydrolase domain containing 3 (ABHD3), mRNA.	NM_138340.3	-0.77	2.76	-1.35	8.06	-0.85	5.02	-1.45	14.07	-0.6	2.33	-0.59	1.53
ILMN_1724497	ABI2	PREDICTED: abl interactor 2 (ABI2), mRNA.	XM_001126750.1	-0.83	7.12	-1.35	14.74	-0.45	3.23	-1.18	19.49	-0.73	7.69	-0.52	3.08
ILMN_1672878	ABR	active BCR-related gene (ABR), transcript variant 2, mRNA.	NM_001092.3	0.21	0.55	-0.93	9.59	-0.02	0.03	-1.04	13.58	-1.01	11.42	-1.14	11.21
ILMN_1802096	ABTB1	ankyrin repeat and BTB (POZ) domain containing 1 (ABTB1), transcript variant 1, mRNA.	NM_032548.2	-0.23	0.43	-2.43	21.66	-0.78	5.09	-2.94	42.53	-2.16	26.46	-2.19	18.32
ILMN_2367165	ABTB1	ankyrin repeat and BTB (POZ) domain containing 1 (ABTB1), transcript variant 3, mRNA.	NM_172028.1	0.1	0.07	-1.14	6.87	-0.24	0.44	-1.48	14.63	-1.24	9.5	-1.24	6.73
ILMN_1724699	ACAD8	acyl-Coenzyme A dehydrogenase family, member 8 (ACAD8), mRNA.	NM_014384.1	-0.92	5.03	-1.21	8.7	-1.06	6.17	-1.2	8.56	-0.15	0.1	-0.3	0.49
ILMN_1739594	ACOT11	acyl-CoA thioesterase 11 (ACOT11), transcript variant 2, mRNA.	NM_147161.2	0.4	1.23	-1.23	10.1	-0.06	0.11	-1.12	18.92	-1.06	15.43	-1.62	12.9
ILMN_1758323	ACPP	acid phosphatase, prostate (ACPP), mRNA.	NM_001099.2	-0.33	0.53	-1.41	9.19	-0.46	2.24	-1.55	21.31	-1.09	10.63	-1.08	5.35
ILMN_1713751	ADAM19	ADAM metallopeptidase domain 19 (meltrin beta) (ADAM19), transcript variant 2, mRNA.	NM_033274.2	1.25	5.43	-0.89	3.43	0.79	2.56	-0.6	1.71	-1.4	7.21	-2.14	11.53
ILMN_1708934	ADM	adrenomedullin (ADM), mRNA.	NM_001124.1	0.47	0.78	-1.09	4.66	-0.03	0.02	-1.26	12.44	-1.23	10.49	-1.56	7.14
ILMN_2404917	AFAP1L2	actin filament associated protein 1-like 2 (AFAP1L2), transcript variant 2, mRNA.	NM_032550.2	-0.12	0.12	-1.61	13.81	0.22	0.52	-1.44	19.04	-1.65	20.97	-1.49	11.36
ILMN_1772645	AGK	acylglycerol kinase (AGK), mRNA.	NM_018238.2	-0.55	3.8	-1.06	11.55	-0.39	2.35	-1.22	20.28	-0.83	9.6	-0.51	3.23
ILMN_2371825	AGL	amylo-1, 6-glucosidase, 4-alpha-glucanotransferase (glycogen debranching enzyme, glycogen storage disease type III) (AGL), transcript variant 5, mRNA.	NM_000645.2	-0.6	2.69	-1.48	12.42	-0.09	0.12	-1.14	12.37	-1.06	9.43	-0.88	5.18
ILMN_1672148	AKR1B10	aldo-keto reductase family 1, member B10 (aldose reductase) (AKR1B10), mRNA.	NM_020299.3	0.75	3.13	-0.59	2.33	0.5	1.3	-2.19	21.34	-2.69	25.78	-1.34	7.91
ILMN_2412336	AKR1C2	aldo-keto reductase family 1, member C2 (dihydrodiol dehydrogenase 2; bile acid binding protein; 3-alpha hydroxysteroid dehydrogenase, type III) (AKR1C2), transcript variant 1, mRNA. XM_943424 XM_943425 XM_943427	NM_001354.4	0.27	0.37	-1.22	7.67	0.43	2.44	-0.96	12.28	-1.39	19.49	-1.49	8.94
ILMN_1713124	AKR1C3	aldo-keto reductase family 1, member C3 (3-alpha hydroxysteroid dehydrogenase, type II) (AKR1C3), mRNA.	NM_003739.4	-0.21	0.25	-1.96	15.21	0.14	0.22	-1.86	22.76	-2	22.77	-1.76	12.14
ILMN_1687757	AKR1C4	aldo-keto reductase family 1, member C4 (chlordecone reductase; 3-alpha hydroxysteroid dehydrogenase, type I; dihydrodiol dehydrogenase 4) (AKR1C4), mRNA.	NM_001818.2	0	0	-1.41	6.05	0.36	1.19	-1.2	12.93	-1.57	17.41	-1.41	5.15
ILMN_1667564	ALDH3A2	aldehyde dehydrogenase 3 family, member A2 (ALDH3A2), transcript variant 1, mRNA.	NM_001031806.1	0.14	0.08	-1.02	4.11	0.41	1.38	-0.97	8.1	-1.39	12.99	-1.16	4.28
ILMN_1794825	ALDH3A2	aldehyde dehydrogenase 3 family, member A2 (ALDH3A2), transcript variant 2, mRNA.	NM_000382.2	0.34	0.92	-1.27	10.64	0.15	0.31	-1.44	20.8	-1.59	21.52	-1.62	12.88
ILMN_2401641	ALDH3A2	aldehyde dehydrogenase 3 family, member A2 (ALDH3A2), transcript variant 1, mRNA.	NM_001031806.1	0.32	0.61	-1.24	8.52	0.07	0.12	-1.56	26.21	-1.63	25.17	-1.57	10.39
ILMN_1732809	ALG9	asparagine-linked glycosylation 9 homolog (S. cerevisiae, alpha- 1,2-mannosyltransferase) (ALG9), transcript variant 4, mRNA.	NM_001077692.1	-0.27	0.62	-1.28	11.67	-0.04	0.05	-1.4	22.19	-1.37	19.07	-1.02	7.52
ILMN_1808792	ALKBH6	alkB, alkylation repair homolog 6 (E. coli) (ALKBH6), transcript variant 1, mRNA.	NM_198867.1	-0.14	0.16	-1.15	8.95	-0.3	1.19	-1.31	19.73	-1.01	11.43	-1.01	6.44
ILMN_1739942	ALS2CR13	amyotrophic lateral sclerosis 2 (juvenile) chromosome region, candidate 13 (ALS2CR13), mRNA.	NM_173511.2	-0.41	1.76	-2.08	20.95	-0.63	4.48	-2.02	32.52	-1.39	17.25	-1.67	15.59
ILMN_1800958	ALS2CR4	amyotrophic lateral sclerosis 2 (juvenile) chromosome region, candidate 4 (ALS2CR4), transcript variant 1, mRNA.	NM_001044385.1	-0.04	0.03	-1.18	10.54	-0.17	0.44	-1.15	17.31	-0.98	11.8	-1.14	8.94
ILMN_1665331	AMT	aminomethyltransferase (AMT), mRNA.	NM_000481.2	0.23	0.22	-1.1	5.65	-0.1	0.11	-1.68	16.34	-1.57	13	-1.33	6.52
ILMN_1801606	AMZ2	archaelysin family metallopeptidase 2 (AMZ2), transcript variant 2, mRNA.	NM_001033569.1	0.15	0.2	-0.89	7.18	-0.36	1.41	-1.43	19.29	-1.07	10.56	-1.04	7.84
ILMN_1760727	ANG	angiogenin, ribonuclease, RNase A family, 5 (ANG), transcript variant 2, mRNA.	NM_001097577.1	-0.16	0.18	-1.24	9.78	-0.22	0.39	-1.04	8.2	-0.82	4.52	-1.08	7.09
ILMN_2390609	ANK3	ankyrin 3, node of Ranvier (ankyrin G) (ANK3), transcript variant 2, mRNA.	NM_001149.2	-0.99	5.04	-1.09	6.64	-0.43	1.26	-1.12	8.87	-0.69	3.01	-0.1	0.06
ILMN_1765091	ANKHD1	ankyrin repeat and KH domain containing 1 (ANKHD1), transcript variant 1, mRNA.	NM_017747.1	-0.27	0.95	-1.13	12.37	-0.36	1.39	-1.3	16.72	-0.94	8.48	-0.86	7.54
ILMN_2185563	ANKRA2	ankyrin repeat, family A (RFXANK-like), 2 (ANKRA2), mRNA.	NM_023039.2	-0.86	4.97	-1.04	7.51	-0.5	2.12	-1.08	10.06	-0.58	2.64	-0.18	0.19
ILMN_1689908	ANKRD13A	ankyrin repeat domain 13A (ANKRD13A), mRNA.	NM_033121.1	-0.17	0.16	-1.29	8.23	0.17	0.4	-1.08	13.32	-1.25	14.96	-1.12	5.74
ILMN_2215824	ANKRD20A1	ankyrin repeat domain 20 family, member A1 (ANKRD20A1), mRNA.	NM_032250.1	-0.35	0.49	-1.06	5.14	-0.02	0.02	-1.16	10.74	-1.14	9.03	-0.72	2.08
ILMN_1739645	ANLN	anillin, actin binding protein (ANLN), mRNA.	NM_018685.2	-0.68	1.04	-1	2.71	0.76	2.36	-0.78	2.89	-1.54	8.72	-0.32	0.19
ILMN_2095610	ANXA8	annexin A8 (ANXA8), mRNA. XM_931361 XM_931369 XM_931374 XM_931375 XM_931378 XM_931383 XM_931388 XM_931391 XM_931399 XM_931404 XM_931411	NM_001040084.1	0.37	0.33	-0.64	1.24	0.11	0.17	-1.06	10.16	-1.18	10.53	-1.01	2.41
ILMN_1740772	APBB3	amyloid beta (A4) precursor protein-binding, family B, member 3 (APBB3), transcript variant 3, mRNA.	NM_133172.2	0.01	0	-1.36	7	-0.08	0.1	-2.09	27.73	-2.02	23.73	-1.37	6.1
ILMN_2320513	APBB3	amyloid beta (A4) precursor protein-binding, family B, member 3 (APBB3), transcript variant 2, mRNA.	NM_133173.2	0.47	0.97	-1.34	7.68	0.13	0.22	-1.89	28.26	-2.02	27.94	-1.81	10.34
ILMN_1689431	APCDD1L	adenomatosis polyposis coli down-regulated 1-like (APCDD1L), mRNA.	NM_153360.1	1.31	4.95	-1.38	6.05	1.03	6.58	-0.45	1.49	-1.48	11.82	-2.69	13.46
ILMN_2296950	APOBEC3F	apolipoprotein B mRNA editing enzyme, catalytic polypeptide-like 3F (APOBEC3F), transcript variant 2, mRNA.	NM_001006666.1	-0.35	0.79	-1.59	12.39	-0.4	2.53	-1.47	26.77	-1.07	14.92	-1.24	7.86
ILMN_1777301	ARL13B	ADP-ribosylation factor-like 13B (ARL13B), transcript variant 1, mRNA.	NM_182896.1	-0.32	0.37	-1.04	4.59	-0.58	2.03	-1.09	7.65	-0.51	1.43	-0.73	1.94
ILMN_2232463	ARL14	ADP-ribosylation factor-like 14 (ARL14), mRNA.	NM_025047.1	0.06	0.04	-2.6	20.23	-0.15	0.18	-3.07	36.91	-2.92	31.82	-2.65	19.15
ILMN_2307266	ARL6	ADP-ribosylation factor-like 6 (ARL6), transcript variant 1, mRNA.	NM_032146.3	-1.16	6.34	-1.53	10.51	-0.52	1.71	-1.14	8.44	-0.61	2.18	-0.37	0.67
ILMN_1771822	ARL6	ADP-ribosylation factor-like 6 (ARL6), transcript variant 2, mRNA.	NM_177976.1	-1.02	5.57	-1.47	10.64	-0.82	5.15	-1.35	13.65	-0.53	2.04	-0.45	1.14
ILMN_2180677	ARMCX1	armadillo repeat containing, X-linked 1 (ARMCX1), mRNA.	NM_016608.1	-0.83	2.76	-1.23	6.25	-0.87	3.91	-1.13	7.1	-0.26	0.28	-0.4	0.57
ILMN_1785170	ARMCX2	armadillo repeat containing, X-linked 2 (ARMCX2), mRNA.	NM_177949.1	-0.13	0.16	-1.11	9.42	-0.38	1.8	-1.24	17.83	-0.86	8.56	-0.98	6.89
ILMN_1741156	ARMCX5	armadillo repeat containing, X-linked 5 (ARMCX5), mRNA.	NM_022838.2	-0.71	2.56	-1.48	9.68	0.38	1.17	-0.89	6.85	-1.27	11.14	-0.77	2.9
ILMN_2405305	ARNTL	aryl hydrocarbon receptor nuclear translocator-like (ARNTL), transcript variant 2, mRNA.	NM_001030272.1	0.26	0.21	-1.48	6.83	0	0	-1.28	16.2	-1.27	14.23	-1.74	7.58
ILMN_1685097	ASCC1	activating signal cointegrator 1 complex subunit 1 (ASCC1), mRNA.	NM_015947.2	-0.37	1.33	-1.34	12.84	-0.53	2.71	-1.65	21.98	-1.12	10.43	-0.97	7.39
ILMN_1660749	ASPSCR1	alveolar soft part sarcoma chromosome region, candidate 1 (ASPSCR1), mRNA.	NM_024083.2	-0.23	0.77	-1.24	15.31	0.08	0.14	-1.28	20.27	-1.35	19.76	-1.02	10.92
ILMN_2089073	ATP9A	ATPase, class II, type 9A (ATP9A), mRNA.	NM_006045.1	0.29	0.63	-0.83	5.77	0.15	0.35	-0.85	9.4	-1	10.91	-1.12	7.87
ILMN_2140207	ATPBD4	ATP binding domain 4 (ATPBD4), mRNA.	NM_080650.2	-0.24	0.33	-1.26	8.58	0.35	0.96	-0.74	4.65	-1.09	8.19	-1.02	5.37
ILMN_2231911	AUH	AU RNA binding protein/enoyl-Coenzyme A hydratase (AUH), nuclear gene encoding mitochondrial protein, mRNA.	NM_001698.1	0.1	0.1	-1.81	16.19	-0.43	1.74	-2.65	40.57	-2.22	29.87	-1.91	15.75
ILMN_1720850	BAZ2B	bromodomain adjacent to zinc finger domain, 2B (BAZ2B), mRNA.	NM_013450.2	-0.24	0.32	-1.34	9.21	-0.32	0.92	-1.04	10.09	-0.72	4.44	-1.1	6
ILMN_2230035	BBS2	Bardet-Biedl syndrome 2 (BBS2), mRNA.	NM_031885.2	-0.52	1.77	-1.4	10.51	-0.67	5.17	-1.91	30.46	-1.24	14.38	-0.88	4.52
ILMN_1767612	BBS2	Bardet-Biedl syndrome 2 (BBS2), mRNA.	NM_031885.2	-0.62	2.65	-1.61	12.96	-0.53	3.04	-1.92	29.36	-1.39	16.43	-0.99	5.77
ILMN_1794956	BBS9	Bardet-Biedl syndrome 9 (BBS9), transcript variant 3, mRNA.	NM_001033604.1	-0.21	0.19	-1.22	6.68	-0.69	2.53	-2.12	20.48	-1.43	9.48	-1.02	4.21
ILMN_1752899	BCL11A	B-cell CLL/lymphoma 11A (zinc finger protein) (BCL11A), transcript variant 1, mRNA.	NM_022893.2	0.22	0.46	-1.3	12.12	-0.26	0.59	-1.04	9.51	-0.78	4.86	-1.52	13.27
ILMN_1746561	BCL2L2	BCL2-like 2 (BCL2L2), mRNA.	NM_004050.2	-0.46	2.15	-1.42	13.85	-0.2	0.43	-1.01	10.31	-0.81	6.02	-0.95	7.27
ILMN_1737314	BCL6	B-cell CLL/lymphoma 6 (zinc finger protein 51) (BCL6), transcript variant 1, mRNA.	NM_001706.2	-0.3	0.39	-1.11	5.87	-0.46	1.06	-1.85	15.95	-1.39	8.61	-0.81	2.88
ILMN_1775192	BCLAF1	BCL2-associated transcription factor 1 (BCLAF1), transcript variant 2, mRNA.	NM_001077440.1	-0.02	0.01	-1.39	11.76	0	0	-1.23	13.89	-1.24	12.26	-1.37	10.33
ILMN_2357272	BCLAF1	BCL2-associated transcription factor 1 (BCLAF1), transcript variant 1, mRNA.	NM_014739.2	0.08	0.04	-1.15	4.66	0.27	0.33	-1.24	6.29	-1.52	7.75	-1.23	4.41
ILMN_2181892	BEX2	brain expressed X-linked 2 (BEX2), mRNA.	NM_032621.2	-0.42	0.8	-1.43	8.64	-0.72	5.62	-1.93	30.15	-1.21	13.51	-1.01	4.3
ILMN_1806473	BEX5	BEX family member 5 (BEX5), mRNA.	NM_001012978.1	-0.72	2.92	-1.23	8.02	-0.98	7.79	-1.23	12.54	-0.25	0.43	-0.51	1.38
ILMN_1695354	BMF	Bcl2 modifying factor (BMF), transcript variant 2, mRNA.	NM_033503.3	-0.38	0.41	-3.17	17.05	-0.93	3.73	-2.61	24.05	-1.68	10.64	-2.79	13.52
ILMN_2308338	BMF	Bcl2 modifying factor (BMF), transcript variant 4, mRNA.	NM_001003943.1	-0.44	0.54	-3.26	17.57	-0.76	3.18	-2.31	23.84	-1.55	11.27	-2.83	13.76
ILMN_2045419	BNIP3L	BCL2/adenovirus E1B 19kDa interacting protein 3-like (BNIP3L), mRNA.	NM_004331.2	-1.14	4.68	-2.11	12.63	-0.34	0.65	-1.59	13.1	-1.25	7.46	-0.97	3.36
ILMN_1718961	BNIP3L	BCL2/adenovirus E1B 19kDa interacting protein 3-like (BNIP3L), mRNA.	NM_004331.2	0.3	0.23	-1.34	5.01	-0.08	0.06	-1.6	9.55	-1.52	7.55	-1.64	5.94
ILMN_1738027	BRCA1	breast cancer 1, early onset (BRCA1), transcript variant BRCA1-delta14-17, mRNA.	NM_007299.2	-0.94	3.7	-1.46	8.39	1.07	8.49	-0.76	4.92	-1.83	19.51	-0.52	1.05
ILMN_1673518	BRWD1	bromodomain and WD repeat domain containing 1 (BRWD1), transcript variant 3, mRNA.	NM_001007246.1	-0.18	0.26	-1.63	14.29	-0.01	0.01	-1.4	17.08	-1.4	14.99	-1.45	11.2
ILMN_1734483	BSDC1	BSD domain containing 1 (BSDC1), mRNA.	NM_018045.5	-0.28	1.12	-1.21	14.18	-0.48	2.7	-1.43	20.49	-0.95	9.22	-0.93	9.09
ILMN_1707481	BTBD15	BTB (POZ) domain containing 15 (BTBD15), mRNA.	NM_014155.2	-1.03	6.1	-1.21	8.58	-0.44	1.48	-1.01	8.38	-0.57	2.41	-0.17	0.16
ILMN_1699728	BTD	biotinidase (BTD), mRNA.	NM_000060.2	-0.9	3.59	-1.8	11.59	-0.68	4.32	-1.39	16.61	-0.71	4.39	-0.9	3.48
ILMN_1775743	BTG1	B-cell translocation gene 1, anti-proliferative (BTG1), mRNA.	NM_001731.1	0.02	0.01	-1.5	12.82	-0.28	0.69	-2.01	26.73	-1.72	19.3	-1.52	11.76
ILMN_1772706	C10orf32	chromosome 10 open reading frame 32 (C10orf32), mRNA.	NM_144591.2	-0.48	0.79	-1.52	7.75	-0.57	3.16	-1.84	25.86	-1.27	13.07	-1.04	3.56
ILMN_2151056	C10orf32	chromosome 10 open reading frame 32 (C10orf32), mRNA.	NM_144591.1	-0.33	0.61	-1.68	12.32	-0.45	2.49	-1.6	24.97	-1.15	13.36	-1.35	8.17
ILMN_1662470	C10orf35	chromosome 10 open reading frame 35 (C10orf35), mRNA.	NM_145306.2	-0.16	0.29	-1.74	18.32	-0.1	0.17	-1.71	26.21	-1.61	21.61	-1.58	15.2
ILMN_1672717	C10orf57	chromosome 10 open reading frame 57 (C10orf57), mRNA.	NM_025125.2	-0.2	0.42	-1.33	13.31	-0.29	1.08	-1.66	26.96	-1.37	18.25	-1.13	9.68
ILMN_2341487	C11orf49	chromosome 11 open reading frame 49 (C11orf49), transcript variant 2, mRNA.	NM_001003677.1	-0.1	0.06	-1.15	5.85	-0.24	0.39	-1.1	8.02	-0.87	4.39	-1.05	4.26
ILMN_1779163	C11orf67	chromosome 11 open reading frame 67 (C11orf67), mRNA.	NM_024684.2	-0.3	0.32	-1.33	6.59	-0.67	1.68	-1.46	8.43	-0.79	2.2	-1.03	3.68
ILMN_2168520	C11orf70	chromosome 11 open reading frame 70 (C11orf70), mRNA.	NM_032930.1	0.26	0.35	-0.79	3.8	-0.2	0.37	-1.12	10.7	-0.92	6.55	-1.04	5.2
ILMN_1659017	C11orf74	chromosome 11 open reading frame 74 (C11orf74), mRNA.	NM_138787.2	-0.59	0.62	-1.25	3.32	-1.03	5.75	-2.22	22.65	-1.2	7.16	-0.66	0.7
ILMN_1658494	C13orf15	chromosome 13 open reading frame 15 (C13orf15), mRNA.	NM_014059.2	1.5	9.61	-0.49	1.71	1.42	14.64	-1.58	18.4	-3	39.66	-1.99	13.63
ILMN_1666208	C14orf106	chromosome 14 open reading frame 106 (C14orf106), mRNA.	NM_018353.3	-0.14	0.21	-1.04	9.39	0.88	8.31	-0.22	0.68	-1.1	11.6	-0.89	6.59
ILMN_2354269	C14orf140	chromosome 14 open reading frame 140 (C14orf140), transcript variant 2, mRNA.	NM_001042430.1	-0.8	3.81	-1.66	12.59	-0.84	9.03	-2	35.7	-1.16	14.79	-0.86	4.16
ILMN_2193315	C14orf143	chromosome 14 open reading frame 143 (C14orf143), mRNA.	NM_145231.2	-0.67	3.18	-1.54	12.62	-0.11	0.19	-1.51	21.05	-1.4	16.69	-0.87	4.84
ILMN_2053281	C14orf149	chromosome 14 open reading frame 149 (C14orf149), mRNA.	NM_144581.1	-0.72	4.78	-1.77	17.59	0.02	0.02	-1.17	10.86	-1.2	9.78	-1.05	8.44
ILMN_1721106	C14orf159	chromosome 14 open reading frame 159 (C14orf159), mRNA.	NM_024952.5	0.51	2.11	-0.63	3.76	0.27	1.06	-1.02	14.71	-1.28	18.78	-1.14	8.27
ILMN_1657111	C14orf78	PREDICTED: chromosome 14 open reading frame 78 (C14orf78), mRNA.	XM_001132404.1	-0.14	0.2	-1.45	14.29	-0.44	2.08	-1.12	13.45	-0.69	4.85	-1.31	11.44
ILMN_1775330	C15orf52	chromosome 15 open reading frame 52 (C15orf52), mRNA.	NM_207380.1	1.3	8.16	-0.2	0.33	0.45	1.8	-0.89	7.66	-1.33	13.45	-1.5	9.83
ILMN_2221076	C17orf85	chromosome 17 open reading frame 85 (C17orf85), mRNA.	NM_018553.1	0.14	0.19	-1.45	14.14	0	0	-1.19	15.35	-1.19	13.53	-1.59	14.28
ILMN_2169089	C18orf54	chromosome 18 open reading frame 54 (C18orf54), mRNA.	NM_173529.3	-0.79	3.64	-1.55	11.43	0.35	1.05	-1.3	14.22	-1.65	18.29	-0.76	3.29
ILMN_2273572	C1orf102	chromosome 1 open reading frame 102 (C1orf102), transcript variant 2, mRNA.	NM_206837.1	-0.36	1.16	-1.05	9	-0.38	1.92	-1.28	19.32	-0.9	9.56	-0.69	4.01
ILMN_1725906	C1orf104	chromosome 1 open reading frame 104 (C1orf104), mRNA.	NM_173639.1	-0.72	3.68	-1.03	7.37	-0.5	3.82	-1.11	17.32	-0.61	5.37	-0.3	0.57
ILMN_2371470	C1orf124	chromosome 1 open reading frame 124 (C1orf124), transcript variant 1, mRNA.	NM_032018.4	0.03	0.02	-1.23	11.5	-0.31	0.99	-1.19	13.96	-0.88	7.19	-1.25	10.6
ILMN_1676016	C1orf152	PREDICTED: chromosome 1 open reading frame 152 (C1orf152), mRNA.	XM_001134421.1	-0.78	1.9	-1.08	4.07	-0.96	2.83	-1.23	5.12	-0.27	0.18	-0.3	0.23
ILMN_1734486	C1orf19	chromosome 1 open reading frame 19 (C1orf19), mRNA.	NM_052965.1	-0.21	0.24	-2.1	16.01	-0.13	0.29	-2.1	38.73	-1.97	32.82	-1.9	12.99
ILMN_1667966	C1orf24	chromosome 1 open reading frame 24 (C1orf24), transcript variant 2, mRNA.	NM_052966.1	0.4	0.58	-1.37	7.11	-0.1	0.16	-1.11	12.18	-1.01	8.99	-1.77	8.99
ILMN_1657446	C1orf57	chromosome 1 open reading frame 57 (C1orf57), mRNA.	NM_032324.1	0	0	-1.44	12.49	0.15	0.45	-1.41	28.25	-1.56	29.3	-1.44	11.26
ILMN_1729288	C1QTNF6	C1q and tumor necrosis factor related protein 6 (C1QTNF6), transcript variant 1, mRNA.	NM_031910.3	0.84	4.49	-0.46	1.78	-0.04	0.05	-1.13	12.65	-1.09	10.41	-1.3	8.71
ILMN_1708016	C20orf108	chromosome 20 open reading frame 108 (C20orf108), mRNA.	NM_080821.2	-0.29	0.25	-1.62	7.35	0.5	1.8	-0.93	6.72	-1.43	12.41	-1.32	4.58
ILMN_2224486	C3orf14	chromosome 3 open reading frame 14 (C3orf14), mRNA.	NM_020685.3	-0.92	2.4	-1.05	3.56	-0.56	2.38	-1.55	16.95	-0.99	6.93	-0.13	0.05
ILMN_1698677	C4orf27	chromosome 4 open reading frame 27 (C4orf27), mRNA.	NM_017867.1	-0.36	0.91	-1.47	11.83	-0.14	0.28	-1.46	20.75	-1.32	15.77	-1.11	7.07
ILMN_1812701	C4orf33	chromosome 4 open reading frame 33 (C4orf33), transcript variant 2, mRNA.	NM_001099783.1	-0.64	3.82	-1.37	13.2	0.02	0.02	-1.04	11.48	-1.05	10.25	-0.74	4.71
ILMN_1763907	C6orf173	chromosome 6 open reading frame 173 (C6orf173), mRNA.	NM_001012507.1	-0.24	0.29	-1.11	6.29	0.38	0.94	-0.94	6.17	-1.33	9.79	-0.87	3.53
ILMN_1705116	C6orf85	chromosome 6 open reading frame 85 (C6orf85), mRNA.	NM_021945.4	-0.31	0.54	-1.71	12.58	-0.73	3.99	-1.97	23.59	-1.23	9.92	-1.4	8.63
ILMN_1672605	C7orf41	chromosome 7 open reading frame 41 (C7orf41), mRNA.	NM_152793.2	-0.26	0.64	-2.94	26.86	-1.29	12.94	-2.89	42.6	-1.61	17.53	-2.67	23.39
ILMN_1708029	C9orf127	chromosome 9 open reading frame 127 (C9orf127), mRNA.	NM_016446.2	0.06	0.03	-1.25	6.57	-0.86	4.75	-1.94	20.91	-1.08	6.93	-1.31	6.1
ILMN_1770725	C9orf58	chromosome 9 open reading frame 58 (C9orf58), transcript variant 1, mRNA.	NM_031426.2	0.42	1.52	-0.9	6.84	0.46	2.15	-0.65	4.85	-1.1	10.9	-1.32	10.42
ILMN_1777318	C9orf64	chromosome 9 open reading frame 64 (C9orf64), mRNA.	NM_032307.3	-0.39	0.88	-1.68	12.38	-0.44	1.97	-1.53	20.91	-1.1	10.79	-1.29	7.68
ILMN_1731064	CABC1	chaperone, ABC1 activity of bc1 complex homolog (S. pombe) (CABC1), nuclear gene encoding mitochondrial protein, mRNA.	NM_020247.4	0	0	-2.12	14.5	0.03	0.03	-2.99	47.59	-3.02	44.43	-2.12	13.17
ILMN_1737089	CAPN5	calpain 5 (CAPN5), mRNA.	NM_004055.4	-0.64	1.72	-1.11	5.47	-1.03	5.61	-1.24	8.62	-0.21	0.19	-0.47	0.84
ILMN_1699809	CAPNS2	calpain, small subunit 2 (CAPNS2), mRNA.	NM_032330.1	1.14	5.46	-1.75	11.33	0.28	0.41	-2.5	23.64	-2.79	24.78	-2.88	18.13
ILMN_1809477	CARHSP1	calcium regulated heat stable protein 1, 24kDa (CARHSP1), transcript variant 2, mRNA.	NM_001042476.1	-0.53	1.23	-1	4.78	-0.1	0.2	-1.39	24.34	-1.29	19.65	-0.47	0.88
ILMN_1659350	CASP6	caspase 6, apoptosis-related cysteine peptidase (CASP6), transcript variant alpha, mRNA.	NM_001226.3	-0.46	0.98	-1.54	9.66	-0.36	0.96	-1.26	11.91	-0.9	5.71	-1.08	4.88
ILMN_1652237	CBR3	carbonyl reductase 3 (CBR3), mRNA.	NM_001236.3	0.8	4.14	-0.51	2.17	0.64	4.44	-1.2	14.87	-1.84	25.28	-1.31	8.84
ILMN_1813400	CBR4	carbonyl reductase 4 (CBR4), mRNA.	NM_032783.3	0.45	1	-0.67	2.66	0.33	0.8	-0.91	6.54	-1.23	9.79	-1.12	5.47
ILMN_1770678	CBX2	chromobox homolog 2 (Pc class homolog, Drosophila) (CBX2), transcript variant 1, mRNA.	NM_005189.1	0.13	0.14	-1.15	8.96	0.03	0.03	-1.58	22.8	-1.61	21	-1.28	9.21
ILMN_1657361	CBX7	chromobox homolog 7 (CBX7), mRNA.	NM_175709.2	0.34	0.46	-1.28	6.72	-0.09	0.08	-2.11	19.03	-2.02	15.75	-1.62	8.33
ILMN_1791905	CCDC103	coiled-coil domain containing 103 (CCDC103), mRNA.	NM_213607.1	0.56	2.26	-0.89	5.88	0.02	0.02	-1.22	12.88	-1.24	11.6	-1.45	10.51
ILMN_1801766	CCDC109B	coiled-coil domain containing 109B (CCDC109B), mRNA.	NM_017918.3	0.08	0.07	-1.69	15.1	-0.22	0.74	-1.7	30.57	-1.48	22.77	-1.78	14.54
ILMN_1706935	CCDC136	coiled-coil domain containing 136 (CCDC136), mRNA.	NM_022742.3	0.17	0.22	-1.19	9.26	-0.62	4.26	-1.74	26.03	-1.11	11.63	-1.37	9.9
ILMN_1798659	CCDC28A	coiled-coil domain containing 28A (CCDC28A), mRNA.	NM_015439.2	-0.72	4.2	-2.89	25.44	-0.98	10.56	-3.44	59.59	-2.46	39.04	-2.17	18.4
ILMN_2101375	CCDC77	coiled-coil domain containing 77 (CCDC77), mRNA.	NM_032358.2	-0.77	3.01	-1.9	13.28	-0.23	0.54	-2.08	29.36	-1.84	22.42	-1.13	5.66
ILMN_1676523	CCDC91	coiled-coil domain containing 91 (CCDC91), mRNA.	NM_018318.3	0.3	0.32	-1.19	5.48	0.31	0.62	-0.85	4.88	-1.16	7.46	-1.49	6.71
ILMN_1801939	CCNB2	cyclin B2 (CCNB2), mRNA.	NM_004701.2	-0.44	2.06	-1.66	17.11	-0.11	0.21	-2.25	41.57	-2.14	36.13	-1.22	10.93
ILMN_1658743	CCNDBP1	cyclin D-type binding-protein 1 (CCNDBP1), transcript variant 1, mRNA.	NM_012142.2	-0.5	1.07	-1.26	6.76	-0.78	4.71	-1.4	14.42	-0.62	2.76	-0.76	2.34
ILMN_1702247	CCNDBP1	cyclin D-type binding-protein 1 (CCNDBP1), transcript variant 2, mRNA.	NM_037370.1	-0.47	2.02	-1.14	9.93	-0.46	2.35	-1.41	19.41	-0.95	8.89	-0.67	3.69
ILMN_2374425	CCNE1	cyclin E1 (CCNE1), transcript variant 1, mRNA.	NM_001238.1	-0.56	1.56	-1.34	8.2	0.48	2.05	-1.24	13.33	-1.72	19.76	-0.78	2.82
ILMN_2228732	CCNG2	cyclin G2 (CCNG2), mRNA.	NM_004354.1	-1.14	6.13	-2.13	15.47	-1.01	7.6	-2.23	28.42	-1.21	9.79	-0.99	4.72
ILMN_1794190	CCPG1	cell cycle progression 1 (CCPG1), transcript variant 2, mRNA.	NM_020739.2	-0.15	0.15	-1.68	12.26	-0.56	2.36	-1.59	17.51	-1.03	7.39	-1.52	9.68
ILMN_2256765	CDC16	cell division cycle 16 homolog (S. cerevisiae) (CDC16), transcript variant 2, mRNA.	NM_001078645.1	-0.13	0.24	-1.33	16.44	-0.43	2.91	-1.64	30.49	-1.21	17.72	-1.2	13.46
ILMN_1747911	CDC2	cell division cycle 2, G1 to S and G2 to M (CDC2), transcript variant 1, mRNA.	NM_001786.2	-1.09	5.4	-2.17	15.12	0.23	0.52	-1.91	25.65	-2.14	27.2	-1.07	5.05
ILMN_1710428	CDC2	cell division cycle 2, G1 to S and G2 to M (CDC2), transcript variant 1, mRNA.	NM_001786.2	-1.11	3.72	-1.9	9.75	-0.21	0.26	-1.65	11.98	-1.43	8.19	-0.8	1.9
ILMN_1676891	CDC2L6	cell division cycle 2-like 6 (CDK8-like) (CDC2L6), mRNA.	NM_015076.3	-0.26	0.41	-1.11	7.43	-0.93	7.06	-1.52	17.6	-0.59	2.76	-0.85	4.12
ILMN_1802951	CDCA1	cell division cycle associated 1 (CDCA1), transcript variant 1, mRNA.	NM_145697.1	-0.8	2.87	-1.41	8.21	-0.4	1.22	-1.49	16.12	-1.09	8.36	-0.6	1.54
ILMN_1781987	CDK5	cyclin-dependent kinase 5 (CDK5), mRNA.	NM_004935.2	0.37	0.52	-1.07	4.82	-0.29	0.71	-1.66	20.19	-1.37	13.25	-1.44	6.7
ILMN_1666305	CDKN3	cyclin-dependent kinase inhibitor 3 (CDK2-associated dual specificity phosphatase) (CDKN3), mRNA.	NM_005192.2	-0.58	2.76	-1.28	10.93	0.31	0.66	-0.84	5.24	-1.15	7.97	-0.7	3.74
ILMN_1693014	CEBPB	CCAAT/enhancer binding protein (C/EBP), beta (CEBPB), mRNA.	NM_005194.2	0.64	1.92	-0.6	2.02	0.11	0.21	-1.05	13.89	-1.16	14.33	-1.24	6.07
ILMN_1801257	CENPA	centromere protein A (CENPA), transcript variant 2, mRNA.	NM_001042426.1	-0.68	3.22	-1.47	11.72	-0.43	1.35	-1.32	12.72	-0.89	5.49	-0.78	3.96
ILMN_1716279	CENPE	centromere protein E, 312kDa (CENPE), mRNA.	NM_001813.2	-0.62	1.54	-1.21	5.95	-0.43	0.89	-1.37	9.2	-0.94	3.89	-0.59	1.27
ILMN_1664516	CENPF	centromere protein F, 350/400ka (mitosin) (CENPF), mRNA.	NM_016343.3	0.09	0.08	-1.45	12.68	0.35	1.37	-1.79	27.87	-2.13	32	-1.54	12.32
ILMN_1758778	CEP110	centrosomal protein 110kDa (CEP110), mRNA.	NM_007018.4	0.46	0.89	-1.18	6.13	0.26	0.43	-1.21	8.57	-1.47	10.49	-1.64	8.73
ILMN_2224031	CETN3	centrin, EF-hand protein, 3 (CDC31 homolog, yeast) (CETN3), mRNA.	NM_004365.2	-0.46	0.31	-1.37	3.28	-0.22	0.26	-1.12	5.96	-0.91	3.34	-0.91	1.17
ILMN_1800837	CFDP1	craniofacial development protein 1 (CFDP1), mRNA.	NM_006324.2	-0.58	1.14	-1.44	7.01	-0.18	0.19	-1.09	5.4	-0.9	3.19	-0.86	2.43
ILMN_2106902	CHES1	checkpoint suppressor 1 (CHES1), mRNA.	NM_005197.2	-0.17	0.12	-1.11	4.65	0.1	0.09	-0.99	4.42	-1.09	4.53	-0.94	2.86
ILMN_1658504	CHKA	choline kinase alpha (CHKA), transcript variant 2, mRNA.	NM_212469.1	-0.31	1.18	-1.24	13.47	-0.32	1.77	-1.37	25.29	-1.05	15.03	-0.93	8.25
ILMN_1763265	CHMP1B	chromatin modifying protein 1B (CHMP1B), mRNA.	NM_020412.3	-0.38	0.64	-1.43	8.79	-0.5	3.62	-1.21	18.86	-0.71	6.72	-1.06	4.74
ILMN_1715607	CHMP4A	chromatin modifying protein 4A (CHMP4A), mRNA.	NM_014169.2	-0.3	0.73	-1.04	8.39	0.07	0.1	-1	10.72	-1.06	10.47	-0.74	4.21
ILMN_1735058	CHST12	carbohydrate (chondroitin 4) sulfotransferase 12 (CHST12), mRNA.	NM_018641.3	0.01	0.01	-1.75	16.35	-0.36	1.46	-2.07	32.92	-1.71	22.95	-1.76	15.12
ILMN_1743340	CHST14	carbohydrate (N-acetylgalactosamine 4-0) sulfotransferase 14 (CHST14), mRNA.	NM_130468.2	0.53	1.59	-0.51	1.79	0.64	3.14	-0.37	1.19	-1.01	7.04	-1.05	5.34
ILMN_2414027	CKLF	chemokine-like factor (CKLF), transcript variant 6, mRNA.	NM_001040139.1	-0.13	0.13	-1.09	7.48	0.16	0.27	-1.31	14.7	-1.46	15.54	-0.96	5.25
ILMN_2072568	CLDN8	claudin 8 (CLDN8), mRNA.	NM_199328.1	1.9	10.64	-0.12	0.11	1.48	13.69	-2.13	25.34	-3.61	44.57	-2.02	11.35
ILMN_1746676	CLDN8	claudin 8 (CLDN8), mRNA.	NM_199328.1	0.81	2.78	-0.54	1.5	1.55	15.41	-1.68	18.76	-3.22	40.61	-1.35	6.44
ILMN_1705442	CMTM3	CKLF-like MARVEL transmembrane domain containing 3 (CMTM3), transcript variant 1, mRNA.	NM_144601.2	0.88	4.99	-0.62	3.12	0.49	3.55	-0.9	11.91	-1.39	21	-1.5	10.8
ILMN_1702383	CNGB1	cyclic nucleotide gated channel beta 1 (CNGB1), mRNA.	NM_001297.1	-0.61	1.61	-1.26	6.8	-0.69	2.61	-1.06	6.61	-0.37	0.62	-0.65	1.73
ILMN_1662328	CNNM3	cyclin M3 (CNNM3), transcript variant 1, mRNA.	NM_017623.4	-0.8	4.01	-1.1	7.6	-1.12	9.9	-1.43	15.86	-0.3	0.64	-0.3	0.51
ILMN_2252408	CNPY4	canopy 4 homolog (zebrafish) (CNPY4), mRNA.	NM_152755.1	0.11	0.08	-1.12	6.17	0.52	2.39	-0.83	6.73	-1.35	13.54	-1.23	6.15
ILMN_1690223	CNTNAP2	contactin associated protein-like 2 (CNTNAP2), mRNA.	NM_014141.4	1.19	10.45	-1.56	15.7	0.86	9.33	-0.62	5.67	-1.48	21.44	-2.76	24.72
ILMN_1770936	COQ5	coenzyme Q5 homolog, methyltransferase (S. cerevisiae) (COQ5), mRNA.	NM_032314.3	-0.23	0.65	-1.06	11.55	-0.57	4.03	-1.64	26.2	-1.07	12.09	-0.84	7.33
ILMN_2225735	CRBN	cereblon (CRBN), mRNA.	NM_016302.2	-0.29	0.72	-1.24	11.2	-0.29	1.14	-1.27	19.39	-0.98	11.25	-0.96	6.83
ILMN_1813256	CRIPT	cysteine-rich PDZ-binding protein (CRIPT), mRNA.	NM_014171.3	-0.78	6.1	-1.42	14.98	-0.56	5.28	-1.55	29.68	-0.98	13.53	-0.64	4.24
ILMN_2392352	CTPS2	CTP synthase II (CTPS2), transcript variant 2, mRNA.	NM_175859.1	0.15	0.18	-1.02	7.25	0.05	0.05	-1.35	13.34	-1.4	12.41	-1.17	7.79
ILMN_2374036	CTSL1	cathepsin L1 (CTSL1), transcript variant 2, mRNA.	NM_145918.2	-0.29	1.04	-1.03	11.14	-0.58	5.38	-1.34	24.03	-0.77	8.6	-0.75	6.15
ILMN_2278636	CUTL1	cut-like 1, CCAAT displacement protein (Drosophila) (CUTL1), transcript variant 1, mRNA.	NM_181552.1	-0.84	3.45	-1.39	8.78	-0.67	2.39	-1.19	8.04	-0.52	1.33	-0.56	1.45
ILMN_1798360	CXCR7	chemokine (C-X-C motif) receptor 7 (CXCR7), mRNA.	NM_020311.2	0.57	1.18	-2.07	11.99	0.27	0.55	-2.52	31.49	-2.8	32.77	-2.64	14.48
ILMN_2371458	CXCR7	chemokine (C-X-C motif) receptor 7 (CXCR7), transcript variant 1, mRNA.	NM_001047841.1	1.38	5.55	-1.44	6.7	0.61	2.67	-2.1	24.96	-2.71	31.95	-2.83	14.56
ILMN_2061419	CYCSL1	cytochrome c, somatic-like 1 (CYCSL1) on chromosome 6.	NR_001561.1	-0.83	1.31	-1.18	3.11	-0.6	1.31	-1.21	5.86	-0.61	1.23	-0.35	0.19
ILMN_2391333	CYP20A1	cytochrome P450, family 20, subfamily A, polypeptide 1 (CYP20A1), transcript variant 1, mRNA.	NM_177538.1	-0.71	4.51	-1.15	10.38	-0.74	7.1	-1.27	19.17	-0.53	3.61	-0.44	1.72
ILMN_1736190	CYP4F3	cytochrome P450, family 4, subfamily F, polypeptide 3 (CYP4F3), mRNA.	NM_000896.1	-0.12	0.09	-1.67	11.2	-0.1	0.08	-2.14	18.34	-2.05	15.11	-1.55	8.98
ILMN_1787251	DAAM1	dishevelled associated activator of morphogenesis 1 (DAAM1), mRNA.	NM_014992.1	-0.07	0.02	-1.79	5.89	0.45	0.87	-0.83	3.27	-1.28	6.35	-1.72	4.72
ILMN_2046470	DAAM1	dishevelled associated activator of morphogenesis 1 (DAAM1), mRNA.	NM_014992.1	-0.91	1.82	-2.67	12	0.01	0.01	-0.99	5.03	-1	4.34	-1.77	5.84
ILMN_1791847	DAPK2	death-associated protein kinase 2 (DAPK2), mRNA.	NM_014326.3	0.07	0.03	-1.26	4.37	0.27	0.34	-1.33	7.35	-1.6	8.87	-1.32	4.02
ILMN_1676191	DARS2	aspartyl-tRNA synthetase 2, mitochondrial (DARS2), nuclear gene encoding mitochondrial protein, mRNA.	NM_018122.3	-0.44	1.25	-1.99	16.09	-0.03	0.03	-1.98	25.27	-1.96	22.32	-1.56	10.93
ILMN_1694530	DDA1	DET1 and DDB1 associated 1 (DDA1), mRNA.	NM_024050.4	-0.35	1.52	-1.64	18.31	-0.21	0.8	-1.17	21.18	-0.96	13.82	-1.29	12.94
ILMN_1727001	DDX46	DEAD (Asp-Glu-Ala-Asp) box polypeptide 46 (DDX46), mRNA.	NM_014829.2	0.27	0.43	-1.02	6.42	0.2	0.55	-1.06	14.62	-1.26	16.91	-1.29	7.95
ILMN_2366790	DDX52	DEAD (Asp-Glu-Ala-Asp) box polypeptide 52 (DDX52), transcript variant 1, mRNA.	NM_007010.2	-0.77	3.18	-1.67	11.74	-0.35	1.6	-1.64	26.93	-1.29	16.9	-0.9	4.02
ILMN_2103685	DEPDC1B	DEP domain containing 1B (DEPDC1B), mRNA.	NM_018369.1	-0.75	3.1	-1.49	10.27	-0.06	0.05	-1.44	12.14	-1.38	9.88	-0.74	2.85
ILMN_1670145	DFNA5	deafness, autosomal dominant 5 (DFNA5), mRNA.	NM_004403.2	0.24	0.78	-1.22	14.05	-0.25	1.03	-1.36	24.54	-1.11	16.14	-1.46	15.66
ILMN_1754643	DGCR14	DiGeorge syndrome critical region gene 14 (DGCR14), mRNA.	NM_022719.2	0.12	0.1	-1.28	9.31	0.19	0.43	-1.21	14.23	-1.4	15.97	-1.39	9.29
ILMN_2319910	DGKA	diacylglycerol kinase, alpha 80kDa (DGKA), transcript variant 4, mRNA.	NM_201554.1	0.39	0.47	-1.32	5.83	0.07	0.06	-0.98	5.43	-1.05	5.27	-1.71	7.53
ILMN_2319913	DGKA	diacylglycerol kinase, alpha 80kDa (DGKA), transcript variant 4, mRNA.	NM_201554.1	0.51	1.18	-0.96	4.6	-0.28	0.44	-1.37	9.8	-1.09	5.59	-1.47	7.77
ILMN_2248589	DHX40	DEAH (Asp-Glu-Ala-His) box polypeptide 40 (DHX40), mRNA.	NM_024612.3	-0.54	1.06	-1.41	7.05	-0.22	0.43	-1.48	16.51	-1.26	11.14	-0.86	2.57
ILMN_1793743	DIRC2	disrupted in renal carcinoma 2 (DIRC2), mRNA.	NM_032839.1	-0.63	4.09	-2.2	22.42	-0.83	8.69	-1.89	32.94	-1.06	12.58	-1.57	14.86
ILMN_1698020	DLC1	deleted in liver cancer 1 (DLC1), transcript variant 3, mRNA.	NM_024767.2	-0.42	0.22	-1.48	3.22	-0.1	0.09	-1.03	6.11	-0.94	4.33	-1.06	1.35
ILMN_1749829	DLG7	discs, large homolog 7 (Drosophila) (DLG7), mRNA.	NM_014750.3	-0.72	1.74	-1.56	7.78	0.53	1.72	-0.96	6.17	-1.48	11.62	-0.84	2.29
ILMN_1672094	DLX1	distal-less homeobox 1 (DLX1), transcript variant 1, mRNA.	NM_178120.4	-0.23	0.38	-1.16	8.97	0.77	5.41	-0.46	2.24	-1.23	11.85	-0.93	5.57
ILMN_1712929	DNAJB12	DnaJ (Hsp40) homolog, subfamily B, member 12 (DNAJB12), transcript variant 1, mRNA.	NM_001002762.1	0.71	1.79	-0.73	2.27	0.71	3.03	-0.35	0.87	-1.06	6.2	-1.44	6.2
ILMN_2402416	DNAJB6	DnaJ (Hsp40) homolog, subfamily B, member 6 (DNAJB6), transcript variant 2, mRNA.	NM_005494.2	-0.03	0.02	-1.18	6.64	-0.56	3.61	-1.2	15.64	-0.64	4.48	-1.15	5.44
ILMN_1804618	DPM2	dolichyl-phosphate mannosyltransferase polypeptide 2, regulatory subunit (DPM2), transcript variant 2, mRNA.	NM_152690.1	-1.03	3.1	-1.34	5.5	-1.12	7.68	-1.37	11.82	-0.25	0.31	-0.3	0.21
ILMN_1655468	DSG3	desmoglein 3 (pemphigus vulgaris antigen) (DSG3), mRNA.	NM_001944.2	0.52	3.24	-1.38	15.07	0.3	1.23	-0.95	12.05	-1.25	16.65	-1.9	19.22
ILMN_1730765	DUSP22	dual specificity phosphatase 22 (DUSP22), mRNA.	NM_020185.3	0.23	0.19	-1.06	4.2	-0.08	0.11	-1.31	16.24	-1.23	12.91	-1.29	4.98
ILMN_1813275	DUSP22	PREDICTED: dual specificity phosphatase 22 (DUSP22), mRNA.	XM_941691.1	-0.02	0.02	-1.11	10.38	-0.47	3.64	-1.38	25.28	-0.92	11.83	-1.09	8.94
ILMN_2396020	DUSP6	dual specificity phosphatase 6 (DUSP6), transcript variant 2, mRNA.	NM_022652.2	0.33	0.13	-1.97	4.68	1.56	5.86	-0.07	0.04	-1.63	5.97	-2.3	5.15
ILMN_1677466	DUSP6	dual specificity phosphatase 6 (DUSP6), transcript variant 1, mRNA.	NM_001946.2	1.4	2.25	-0.57	0.48	0.96	3.82	-0.12	0.12	-1.08	4.54	-1.97	4.08
ILMN_1681890	DYNLT3	dynein, light chain, Tctex-type 3 (DYNLT3), mRNA.	NM_006520.1	-0.65	2.44	-2.49	18.83	-0.14	0.26	-1.01	10.48	-0.87	6.92	-1.84	12.41
ILMN_1798210	E2F7	E2F transcription factor 7 (E2F7), mRNA.	NM_203394.2	0.8	1.77	-0.56	1.05	1.27	7.67	-0.33	0.65	-1.59	10.83	-1.36	4.55
ILMN_1708798	EAF2	ELL associated factor 2 (EAF2), mRNA.	NM_018456.4	-0.29	0.39	-2.96	20.32	-0.33	0.9	-2.25	30.05	-1.92	21.72	-2.67	17.02
ILMN_2073184	EDG8	endothelial differentiation, sphingolipid G-protein-coupled receptor, 8 (EDG8), mRNA.	NM_030760.3	0.15	0.18	-1.01	7.8	0.7	3.8	-0.52	2.38	-1.22	10.03	-1.15	8.34
ILMN_1811616	EEPD1	endonuclease/exonuclease/phosphatase family domain containing 1 (EEPD1), mRNA.	NM_030636.2	0.81	4.95	-0.29	0.87	0.65	4.42	-0.44	2.34	-1.09	10.77	-1.1	7.8
ILMN_1735877	EFEMP1	EGF-containing fibulin-like extracellular matrix protein 1 (EFEMP1), transcript variant 1, mRNA.	NM_004105.3	0.96	5.74	-0.14	0.2	0.86	6.66	-0.25	0.67	-1.11	9.84	-1.1	6.91
ILMN_1755710	EFNA4	ephrin-A4 (EFNA4), transcript variant 2, mRNA.	NM_182689.1	-0.21	0.35	-1.39	11.96	-0.19	0.29	-1.22	9.84	-1.03	6.26	-1.18	8.52
ILMN_1665696	EFNA4	ephrin-A4 (EFNA4), transcript variant 1, mRNA.	NM_005227.2	-0.31	0.76	-1.13	9.45	-1.06	10.42	-1.63	22.35	-0.58	3.13	-0.83	5.08
ILMN_1762899	EGR1	early growth response 1 (EGR1), mRNA.	NM_001964.2	0.51	0.27	-2.46	6.38	0.17	0.14	-2.49	17.39	-2.65	17.05	-2.97	7.39
ILMN_1771264	ELL3	elongation factor RNA polymerase II-like 3 (ELL3), mRNA.	NM_025165.2	-0.16	0.3	-1.5	15.97	-0.15	0.34	-1.05	13.47	-0.9	8.99	-1.33	12.75
ILMN_1709747	ENDOGL1	endonuclease G-like 1 (ENDOGL1), mRNA.	NM_005107.2	0.16	0.13	-0.92	4.4	-0.2	0.37	-2.18	29.42	-1.98	23.32	-1.08	4.86
ILMN_1765796	ENO2	enolase 2 (gamma, neuronal) (ENO2), mRNA.	NM_001975.2	-0.33	0.55	-1.15	6.84	-0.31	0.94	-1.42	17.41	-1.11	10.11	-0.82	3.29
ILMN_1672022	EPHA4	EPH receptor A4 (EPHA4), mRNA.	NM_004438.3	1.11	8.55	-0.47	2.29	0.28	0.45	-1.32	9.71	-1.6	11.72	-1.58	13.29
ILMN_1802646	EPHB6	EPH receptor B6 (EPHB6), mRNA.	NM_004445.2	1.11	3.13	-0.07	0.04	0.76	4.17	-0.34	0.99	-1.1	7.89	-1.18	3.37
ILMN_1651699	EPS8	epidermal growth factor receptor pathway substrate 8 (EPS8), mRNA.	NM_004447.4	-0.9	2.76	-1.12	4.67	-0.57	1.68	-1.3	9.05	-0.73	2.56	-0.22	0.14
ILMN_2388547	EPSTI1	epithelial stromal interaction 1 (breast) (EPSTI1), transcript variant 2, mRNA.	NM_033255.2	0.15	0.21	-1.26	11.91	-0.13	0.27	-1.86	31.09	-1.73	25.55	-1.41	12.29
ILMN_1739222	ETV5	ets variant gene 5 (ets-related molecule) (ETV5), mRNA.	NM_004454.1	1.42	8.03	-0.64	2.38	0.8	2.33	-0.25	0.32	-1.05	3.77	-2.06	12.92
ILMN_1771689	EXDL2	exonuclease 3'-5' domain-like 2 (EXDL2), mRNA.	NM_018199.2	-0.23	0.66	-1.14	12.58	-0.27	0.97	-1.12	15.35	-0.85	8.36	-0.91	8.33
ILMN_1742866	F2R	coagulation factor II (thrombin) receptor (F2R), mRNA.	NM_001992.2	0.88	4.36	-0.52	1.95	0.09	0.12	-1.52	19.15	-1.61	18.55	-1.4	8.8
ILMN_2146761	FABP5	fatty acid binding protein 5 (psoriasis-associated) (FABP5), mRNA.	NM_001444.1	1.78	9.34	-1.6	9.02	1.21	8.71	-0.11	0.15	-1.32	9.59	-3.38	19.46
ILMN_2246661	FAHD1	fumarylacetoacetate hydrolase domain containing 1 (FAHD1), transcript variant 2, mRNA.	NM_031208.1	-0.15	0.14	-1.51	11.33	0.1	0.12	-1.11	9.71	-1.21	9.77	-1.36	8.78
ILMN_1690101	FAIM	Fas apoptotic inhibitory molecule (FAIM), transcript variant 1, mRNA.	NM_001033030.1	-0.1	0.07	-1.27	7.08	-0.38	1.69	-1.28	17.51	-0.9	8.52	-1.16	5.31
ILMN_1775498	FAM100B	family with sequence similarity 100, member B (FAM100B), mRNA.	NM_182565.2	0.06	0.03	-1.62	10.7	-0.31	0.72	-1.98	24.06	-1.67	16.7	-1.67	10.01
ILMN_2401779	FAM102A	family with sequence similarity 102, member A (FAM102A), transcript variant 1, mRNA.	NM_001035254.1	0.12	0.23	-1.15	14.44	0.22	0.52	-1.2	14.46	-1.41	16.64	-1.27	14.71
ILMN_1810725	FAM129A	family with sequence similarity 129, member A (FAM129A), transcript variant 2, mRNA.	NM_052966.2	0.29	0.22	-1.62	6.83	-1.01	3.61	-2.16	15.35	-1.15	4.3	-1.91	7.61
ILMN_2387952	FAM134B	family with sequence similarity 134, member B (FAM134B), transcript variant 1, mRNA.	NM_001034850.1	-0.21	0.3	-1.92	15.82	-0.65	3.67	-2.84	41.54	-2.19	27.47	-1.71	12.6
ILMN_1740319	FAM14A	family with sequence similarity 14, member A (FAM14A), mRNA.	NM_032036.2	-0.64	2.32	-1.43	9.94	-0.4	0.99	-1.09	7.86	-0.69	2.81	-0.79	3.37
ILMN_1706015	FAM43A	family with sequence similarity 43, member A (FAM43A), mRNA.	NM_153690.4	-0.25	0.21	-1.36	6.42	-0.96	6.94	-2.62	35.39	-1.66	16.86	-1.12	3.93
ILMN_1669555	FAM48A	family with sequence similarity 48, member A (FAM48A), transcript variant 1, mRNA.	NM_001014286.2	-0.11	0.12	-1.29	10.86	-0.74	2.73	-1.29	8.67	-0.55	1.37	-1.17	8.49
ILMN_1707553	FAM59A	family with sequence similarity 59, member A (FAM59A), mRNA.	NM_022751.1	0.07	0.05	-1.09	7.12	0	0	-1.1	12.49	-1.1	10.92	-1.17	6.81
ILMN_2239774	FAM83A	family with sequence similarity 83, member A (FAM83A), transcript variant 1, mRNA.	NM_032899.4	1.07	3.16	-0.75	1.91	0.39	0.66	-0.76	2.8	-1.14	5.23	-1.82	7.43
ILMN_1655642	FANCI	Fanconi anemia, complementation group I (FANCI), transcript variant 2, mRNA.	NM_018193.2	-0.57	1.14	-1.36	6.54	0.9	3.75	-0.91	4.3	-1.81	12.73	-0.79	2.08
ILMN_1754045	FANCL	Fanconi anemia, complementation group L (FANCL), mRNA.	NM_018062.2	-0.42	1.15	-1.06	7.29	-0.15	0.21	-1.66	18.51	-1.52	14.15	-0.65	2.64
ILMN_1697561	FBXL16	F-box and leucine-rich repeat protein 16 (FBXL16), mRNA.	NM_153350.2	0.03	0.02	-1.04	6.25	-0.43	1.54	-1.69	20.27	-1.26	11.1	-1.07	5.61
ILMN_1754489	FBXL20	F-box and leucine-rich repeat protein 20 (FBXL20), mRNA.	NM_032875.1	-0.58	3.98	-2.77	27.96	-0.99	13.46	-3.21	62.51	-2.22	39.99	-2.19	21.87
ILMN_1652280	FBXO32	F-box protein 32 (FBXO32), transcript variant 1, mRNA.	NM_058229.2	-0.21	0.23	-2.58	18.66	-1.51	7.94	-3.7	33.94	-2.2	14.33	-2.37	15.75
ILMN_1703955	FBXO32	F-box protein 32 (FBXO32), transcript variant 2, mRNA.	NM_148177.1	-0.22	0.19	-3.66	22.51	-1.08	3.22	-5.01	41.29	-3.93	27.94	-3.44	19.78
ILMN_1672843	FBXO8	F-box protein 8 (FBXO8), mRNA.	NM_012180.2	0.07	0.04	-1.22	7.72	-0.41	1.89	-1.52	21.89	-1.11	11.78	-1.29	7.27
ILMN_1696585	FERMT1	fermitin family homolog 1 (Drosophila) (FERMT1), mRNA.	NM_017671.4	0.19	0.24	-1.86	15.1	-0.15	0.25	-1.51	18.46	-1.36	13.88	-2.05	15.33
ILMN_2115005	FGD2	FYVE, RhoGEF and PH domain containing 2 (FGD2), mRNA.	NM_173558.2	1.74	11.34	-0.37	0.91	0.66	4.17	-0.35	1.34	-1.01	8.65	-2.1	14.12
ILMN_1723123	FGFR3	fibroblast growth factor receptor 3 (achondroplasia, thanatophoric dwarfism) (FGFR3), transcript variant 2, mRNA.	NM_022965.1	0.38	1.66	-1.09	10.8	-0.19	0.39	-1.2	13.91	-1.02	9.13	-1.47	14.09
ILMN_1800889	FIG4	FIG4 homolog (S. cerevisiae) (FIG4), mRNA.	NM_014845.4	-0.28	0.46	-1.06	6.7	-0.44	1.47	-1.22	11.29	-0.78	4.28	-0.78	3.38
ILMN_2368617	FKRP	fukutin related protein (FKRP), transcript variant 1, mRNA.	NM_024301.3	0.1	0.1	-0.92	7.1	-0.75	4.68	-1.7	20.96	-0.96	7.05	-1.01	7.17
ILMN_1790315	FLJ21062	hypothetical protein FLJ21062 (FLJ21062), mRNA.	NM_001039706.1	-0.44	1.26	-1.41	10.65	-0.5	2.77	-2.08	32.9	-1.58	20.29	-0.97	5.33
ILMN_1691966	FLJ35934	FLJ35934 protein (FLJ35934), mRNA.	NM_207453.1	0.62	2.35	-0.45	1.47	0.9	6.89	-0.82	6.3	-1.72	19.38	-1.07	5.88
ILMN_1699852	FLJ37464	hypothetical protein FLJ37464 (FLJ37464), mRNA.	NM_173815.4	-0.3	0.39	-1.22	6.66	-0.46	1.64	-1.05	8.83	-0.58	2.48	-0.91	3.51
ILMN_1771320	FLJ38717	FLJ38717 protein (FLJ38717), mRNA.	NM_001004322.1	0.14	0.06	-0.95	2.45	-0.97	5.86	-1.74	17.41	-0.77	3.52	-1.09	2.58
ILMN_1652333	FN3KRP	fructosamine-3-kinase-related protein (FN3KRP), mRNA.	NM_024619.2	0.01	0	-1.07	12.75	0.14	0.31	-1.37	20.15	-1.51	20.9	-1.08	11.59
ILMN_1751607	FOSB	FBJ murine osteosarcoma viral oncogene homolog B (FOSB), mRNA.	NM_006732.1	0.11	0.02	-1.76	2.85	-0.78	5.86	-2.15	31.78	-1.36	14.71	-1.87	2.61
ILMN_1712095	FOXO4	forkhead box O4 (FOXO4), mRNA.	NM_005938.2	-0.65	1.4	-1.76	9.16	-0.4	0.64	-1.44	8.69	-1.05	4.1	-1.11	3.8
ILMN_2130635	FOXRED2	FAD-dependent oxidoreductase domain containing 2 (FOXRED2), mRNA.	NM_024955.4	-1.02	6.53	-1.1	8.16	-0.25	0.46	-1.08	7.98	-0.82	4.13	-0.08	0.05
ILMN_1781416	FRAT1	frequently rearranged in advanced T-cell lymphomas (FRAT1), mRNA.	NM_005479.2	-0.14	0.11	-1.2	7.54	-0.23	0.44	-1.31	13.15	-1.08	8.26	-1.06	5.39
ILMN_1788213	FRAT2	frequently rearranged in advanced T-cell lymphomas 2 (FRAT2), mRNA.	NM_012083.2	-0.26	0.57	-2.18	20.23	-0.3	1.42	-2.46	49.11	-2.16	39.28	-1.92	16.47
ILMN_1677162	FUSIP1	FUS interacting protein (serine/arginine-rich) 1 (FUSIP1), transcript variant 2, mRNA.	NM_054016.1	-0.53	1.99	-1.47	11.87	0.27	0.54	-0.83	5.25	-1.1	7.57	-0.94	5.48
ILMN_1653711	FZD2	frizzled homolog 2 (Drosophila) (FZD2), mRNA.	NM_001466.2	0.24	0.26	-1.27	7.17	0.1	0.15	-1.42	17.35	-1.52	17.12	-1.51	8.11
ILMN_2151281	GABARAPL1	GABA(A) receptor-associated protein like 1 (GABARAPL1), mRNA.	NM_031412.2	-0.09	0.05	-2.34	14.77	-0.75	2.2	-2.63	22.59	-1.88	11.79	-2.25	12.85
ILMN_1784706	GABRE	gamma-aminobutyric acid (GABA) A receptor, epsilon (GABRE), transcript variant 1, mRNA.	NM_004961.3	-0.13	0.08	-1.61	8.61	1.07	3.25	0.03	0.02	-1.04	2.89	-1.48	6.63
ILMN_1671482	GALM	galactose mutarotase (aldose 1-epimerase) (GALM), mRNA.	NM_138801.1	-0.34	0.47	-1.08	5.21	-0.49	1.59	-2.01	22.3	-1.52	12.76	-0.74	2.18
ILMN_1735157	GALNT12	UDP-N-acetyl-alpha-D-galactosamine:polypeptide N-acetylgalactosaminyltransferase 12 (GalNAc-T12) (GALNT12), mRNA.	NM_024642.3	-1.08	6.52	-0.78	4.35	-0.46	2.33	-1.26	16.48	-0.8	6.66	0.3	0.49
ILMN_1772910	GAS1	growth arrest-specific 1 (GAS1), mRNA.	NM_002048.1	0.05	0.05	-1.5	17.2	-1.01	8.11	-1.84	23.27	-0.84	5.41	-1.55	16.35
ILMN_1673892	GK5	glycerol kinase 5 (putative) (GK5), mRNA.	NM_001039547.1	-0.92	1.49	-1.45	4.15	-1.12	7.87	-2.01	22.1	-0.89	4.84	-0.53	0.42
ILMN_2397721	GLB1	galactosidase, beta 1 (GLB1), transcript variant 2, mRNA.	NM_001079811.1	-0.39	1.26	-1.22	10.39	-0.5	4.82	-1.19	22.55	-0.69	8.09	-0.83	5.11
ILMN_1735155	GLB1	galactosidase, beta 1 (GLB1), transcript variant 179423, mRNA.	NM_000404.1	-0.3	0.67	-1.16	9.45	-0.34	1.67	-1.24	19.27	-0.9	9.99	-0.87	5.27
ILMN_1737308	GLRX	glutaredoxin (thioltransferase) (GLRX), mRNA.	NM_002064.1	-0.03	0.01	-1.55	6.88	-0.18	0.14	-1.24	4.91	-1.06	3.07	-1.52	5.73
ILMN_1670532	GMCL1	germ cell-less homolog 1 (Drosophila) (GMCL1), mRNA.	NM_178439.3	-0.75	1	-1	2.21	-1.59	13.29	-2.05	21.15	-0.46	1.12	-0.26	0.1
ILMN_2412294	GNB5	guanine nucleotide binding protein (G protein), beta 5 (GNB5), transcript variant 1, mRNA.	NM_006578.3	0.1	0.05	-1.26	4.96	-0.17	0.22	-1.19	8.44	-1.02	5.46	-1.36	4.76
ILMN_1757074	GNG10	guanine nucleotide binding protein (G protein), gamma 10 (GNG10), mRNA.	NM_001017998.2	-0.35	0.29	-1.48	5.49	-0.75	5.08	-1.68	21.91	-0.94	7.33	-1.13	2.88
ILMN_1694106	GPD1L	glycerol-3-phosphate dehydrogenase 1-like (GPD1L), mRNA.	NM_015141.2	-0.34	0.52	-1.38	8.14	-0.48	2.7	-2.16	35.69	-1.68	23.13	-1.04	4.45
ILMN_2384056	GPER	G protein-coupled estrogen receptor 1 (GPER), transcript variant 3, mRNA.	NM_001039966.1	0.93	5.23	-0.6	2.81	0	0	-2.33	23.64	-2.34	21.25	-1.53	10.7
ILMN_1795298	GPER	G protein-coupled estrogen receptor 1 (GPER), transcript variant 3, mRNA.	NM_001039966.1	0.79	4.84	-0.76	5.09	0	0	-1.74	16.5	-1.73	14.5	-1.55	12.53
ILMN_2352090	GPRC5C	G protein-coupled receptor, family C, group 5, member C (GPRC5C), transcript variant 2, mRNA.	NM_018653.3	-0.49	2.9	-1.73	19.07	-0.22	0.58	-1.48	21.38	-1.26	14.81	-1.24	12.18
ILMN_1709307	GPSM1	PREDICTED: G-protein signalling modulator 1 (AGS3-like, C. elegans) (GPSM1), mRNA.	XM_939186.2	0.36	1.11	-1.82	17.04	0.1	0.16	-1.57	21.88	-1.67	21.48	-2.18	18.79
ILMN_2405254	GRB7	growth factor receptor-bound protein 7 (GRB7), transcript variant 2, mRNA.	NM_001030002.1	-0.35	0.38	-1.69	8.44	-1	4.34	-3.01	29.02	-2	14.16	-1.34	5.1
ILMN_2286514	GTPBP8	GTP-binding protein 8 (putative) (GTPBP8), transcript variant 1, mRNA.	NM_014170.2	-0.39	0.62	-1.52	8.85	-0.07	0.08	-1.95	25.43	-1.88	21.76	-1.13	4.85
ILMN_2393243	GTPBP8	GTP-binding protein 8 (putative) (GTPBP8), transcript variant 1, mRNA.	NM_014170.2	-0.82	2.91	-1.69	10.37	0.06	0.07	-1.61	18.24	-1.67	17.18	-0.87	3.12
ILMN_1757467	H1F0	H1 histone family, member 0 (H1F0), mRNA.	NM_005318.2	-0.54	2.05	-2.35	19.54	-0.11	0.14	-2.17	27.44	-2.06	23.03	-1.81	13.63
ILMN_1773964	H1FX	H1 histone family, member X (H1FX), mRNA.	NM_006026.2	-0.05	0.02	-1.95	9.97	-0.04	0.05	-2.06	30.22	-2.01	26.64	-1.9	8.52
ILMN_1705570	H2AFY2	H2A histone family, member Y2 (H2AFY2), mRNA.	NM_018649.2	0.08	0.09	-1.03	9.68	0.26	1.12	-1.5	28.91	-1.76	32.32	-1.11	9.54
ILMN_1723414	HACL1	2-hydroxyacyl-CoA lyase 1 (HACL1), mRNA.	NM_012260.2	-0.39	1.01	-2.66	21.81	-0.56	5.68	-2.95	62.32	-2.38	47.06	-2.28	17.47
ILMN_2379520	HAGH	hydroxyacylglutathione hydrolase (HAGH), transcript variant 1, mRNA.	NM_005326.4	-0.59	1.45	-1.85	11.29	-0.5	2.17	-1.65	20.27	-1.15	9.9	-1.26	5.66
ILMN_1772731	HAGH	hydroxyacylglutathione hydrolase (HAGH), transcript variant 1, mRNA.	NM_005326.4	-0.4	1.61	-1.79	17.68	-0.62	3.91	-1.77	25.2	-1.15	11.38	-1.39	12.13
ILMN_1685415	HBP1	HMG-box transcription factor 1 (HBP1), mRNA.	NM_012257.3	0.17	0.18	-1.94	14.71	-0.29	0.52	-2.23	23.2	-1.94	16.75	-2.11	14.76
ILMN_2160764	HBP1	HMG-box transcription factor 1 (HBP1), mRNA.	NM_012257.3	-0.13	0.14	-1.73	15.31	-0.15	0.22	-1.83	21.86	-1.69	17.2	-1.6	12.75
ILMN_1803945	HCP5	HLA complex P5 (HCP5), mRNA.	NM_006674.2	-0.33	1.19	-2.22	23.02	-0.49	3.36	-2.8	52.17	-2.3	39.07	-1.89	18.51
ILMN_1666122	HEG1	HEG homolog 1 (zebrafish) (HEG1), mRNA.	NM_020733.1	-0.21	0.26	-2.05	15.71	-0.2	0.42	-1.25	13.94	-1.05	9.02	-1.84	12.62
ILMN_1656977	HIBCH	3-hydroxyisobutyryl-Coenzyme A hydrolase (HIBCH), transcript variant 2, mRNA.	NM_198047.1	-0.67	1.87	-1.44	8.06	-0.17	0.29	-1.71	20.7	-1.54	15.64	-0.77	2.36
ILMN_1674522	HIGD1A	HIG1 domain family, member 1A (HIGD1A), transcript variant 1, mRNA.	NM_001099668.1	-0.41	0.19	-1.67	3.55	0.34	0.37	-1.4	5.9	-1.74	7.55	-1.26	1.67
ILMN_1661799	HIGD1A	HIG1 domain family, member 1A (HIGD1A), transcript variant 1, mRNA.	NM_001099668.1	-0.65	0.39	-1.62	2.95	0.24	0.2	-1.28	4.61	-1.52	5.43	-0.97	0.81
ILMN_2230016	HIGD1A	HIG1 domain family, member 1A (HIGD1A), mRNA.	NM_014056.1	-0.76	3	-2.22	15.98	0.59	2.04	-0.84	4.69	-1.43	10.51	-1.46	8.54
ILMN_1792689	HIST1H2AC	histone cluster 1, H2ac (HIST1H2AC), mRNA.	NM_003512.3	-0.55	1.06	-1.17	5.17	-1.06	7.52	-1.43	13.67	-0.37	0.83	-0.62	1.27
ILMN_2075334	HIST1H4C	histone cluster 1, H4c (HIST1H4C), mRNA.	NM_003542.3	-0.01	0	-1.36	4.8	-0.1	0.17	-2.11	32.44	-2	27.63	-1.35	4
ILMN_2144426	HIST2H2AA3	histone cluster 2, H2aa3 (HIST2H2AA3), mRNA.	NM_003516.2	-1.05	7.43	-1.05	8.3	-1.18	11.45	-1.12	11.25	0.07	0.04	0	0
ILMN_1732071	HIST2H2BE	histone cluster 2, H2be (HIST2H2BE), mRNA.	NM_003528.2	-0.41	0.76	-1.56	9.89	-0.79	3.63	-1.5	12.91	-0.71	2.8	-1.15	5.49
ILMN_2115340	HIST2H4A	histone cluster 2, H4a (HIST2H4A), mRNA.	NM_003548.2	-0.58	3.16	-1.28	12.04	-0.95	6.86	-2.17	27.93	-1.22	10.16	-0.7	4.3
ILMN_2219712	HMGB2	high-mobility group box 2 (HMGB2), mRNA.	NM_002129.2	-1.68	8.73	-2.55	16	-0.26	0.48	-2.27	25.58	-2	19.15	-0.87	2.86
ILMN_1654268	HMGB2	high-mobility group box 2 (HMGB2), mRNA.	NM_002129.2	-0.59	1.92	-1.55	10.74	0.05	0.05	-2.11	30.15	-2.16	28.18	-0.96	4.52
ILMN_2058141	HMGN2	high-mobility group nucleosomal binding domain 2 (HMGN2), mRNA.	NM_005517.2	-0.84	1.63	-1.33	4.45	0.19	0.19	-0.97	3.89	-1.16	4.62	-0.48	0.46
ILMN_2409220	HMMR	hyaluronan-mediated motility receptor (RHAMM) (HMMR), transcript variant 1, mRNA.	NM_012484.1	-0.74	2.18	-1.95	11.81	-0.03	0.03	-1.94	22.88	-1.91	20	-1.22	5.19
ILMN_1781942	HMMR	hyaluronan-mediated motility receptor (RHAMM) (HMMR), transcript variant 2, mRNA.	NM_012485.1	-0.3	0.55	-1.11	7.4	0.67	2.54	-1.29	9.78	-1.95	17.11	-0.81	3.75
ILMN_1663447	HNRNPA1	heterogeneous nuclear ribonucleoprotein A1 (HNRNPA1), transcript variant 2, mRNA.	NM_031157.2	-0.41	0.34	-1.12	3.06	0	0	-1.03	3.9	-1.03	3.27	-0.71	0.97
ILMN_1751368	HNRNPD	heterogeneous nuclear ribonucleoprotein D (AU-rich element RNA binding protein 1, 37kDa) (HNRNPD), transcript variant 3, mRNA.	NM_002138.3	0.18	0.27	-1.64	14.77	0.62	5.06	-1.41	22.29	-2.02	33.05	-1.82	15.14
ILMN_2321451	HNRNPD	heterogeneous nuclear ribonucleoprotein D (AU-rich element RNA binding protein 1, 37kDa) (HNRNPD), transcript variant 2, mRNA.	NM_031369.2	-0.05	0.04	-1.33	13.92	0.68	7.1	-0.66	7.21	-1.34	20.72	-1.28	12.08
ILMN_2369682	HNRPA2B1	heterogeneous nuclear ribonucleoprotein A2/B1 (HNRPA2B1), transcript variant B1, mRNA.	NM_031243.1	-0.31	0.64	-1.33	10.11	0.31	1.09	-0.73	6.64	-1.04	10.72	-1.01	5.95
ILMN_1654920	HNRPH3	heterogeneous nuclear ribonucleoprotein H3 (2H9) (HNRPH3), transcript variant 2H9, mRNA.	NM_012207.1	-0.44	0.65	-2.48	14.28	0.74	4.42	-1.14	10.78	-1.88	21.13	-2.03	10.09
ILMN_2107068	HOXA2	homeobox A2 (HOXA2), mRNA.	NM_006735.3	-0.52	1.26	-1.7	11.03	-0.3	0.88	-1.92	27.25	-1.62	19.15	-1.18	5.7
ILMN_1799836	HOXA2	homeobox A2 (HOXA2), mRNA.	NM_006735.3	-0.04	0.04	-1.29	12.67	-0.34	1.7	-1.96	36.18	-1.62	25.61	-1.25	10.94
ILMN_1746158	HOXD11	homeobox D11 (HOXD11), mRNA.	NM_021192.2	-0.27	0.55	-1.54	13.33	-0.3	0.85	-1.12	11.38	-0.81	5.57	-1.27	9.34
ILMN_1865735		AGENCOURT_14360862 NIH_MGC_187 cDNA clone IMAGE:30405414 5, mRNA sequence		-0.05	0.03	-1.93	11.44	-0.49	0.78	-2.16	14.17	-1.67	7.94	-1.88	9.86
ILMN_1903159		cDNA FLJ42306 fis, clone TRACH2001646		0.33	0.6	-0.91	5.15	0.71	3.55	-0.43	1.49	-1.14	8.17	-1.23	7.22
ILMN_1898059		BX112190 Soares_NFL_T_GBC_S1 cDNA clone IMAGp998F024129, mRNA sequence		0.66	0.85	-0.46	0.53	-0.04	0.02	-1.04	3.22	-1	2.47	-1.11	2.4
ILMN_1879480		cDNA FLJ35319 fis, clone PROST2011577		0.39	0.61	-0.94	4.16	-0.04	0.03	-1.55	14.49	-1.51	12.24	-1.33	6.25
ILMN_1897741		AV737943 CB cDNA clone CBDAEG06 5, mRNA sequence		-0.25	0.38	-1.44	10.89	0.1	0.15	-0.91	8.24	-1.01	8.6	-1.19	7.39
ILMN_1911047		clone DNA57836 GLPG464 (UNQ464) mRNA, complete cds		-1.38	12.97	-2.1	21.39	-0.41	1.8	-1.35	18.04	-0.94	8.73	-0.71	4.85
ILMN_1857335		cDNA FLJ35432 fis, clone SMINT2002311		0.13	0.1	-1.09	5.93	-0.24	0.49	-2.11	26.4	-1.87	19.86	-1.22	6.08
ILMN_1868866		PREDICTED: hypothetical LOC126435 (LOC126435), mRNA		-0.41	1.06	-1	6.4	-0.86	5.39	-1.15	10	-0.29	0.52	-0.59	2.09
ILMN_1826921		mRNA; cDNA DKFZp686B15184 (from clone DKFZp686B15184)		0.4	0.92	-1.15	7.49	-0.44	2.29	-1.34	18.71	-0.9	8.43	-1.55	10.06
ILMN_1878029		cDNA FLJ34585 fis, clone KIDNE2008758		-0.24	0.3	-1.2	7.28	-0.95	7.15	-2.1	27.57	-1.15	9.54	-0.96	4.33
ILMN_1901198		HSPC157 protein, mRNA (cDNA clone IMAGE:6672800), partial cds		0.47	0.76	-0.63	1.72	0.21	0.23	-1.33	7.74	-1.53	8.67	-1.1	3.96
ILMN_1864422		cDNA clone IMAGE:5272804		-0.79	3.95	-1.54	11.98	-0.36	1.48	-1.24	16.61	-0.88	8.21	-0.75	3.45
ILMN_1827736		cDNA clone IMAGE:5262734		-0.33	0.41	-1.51	8.27	-0.63	2.95	-1.8	20.87	-1.18	9.16	-1.18	4.86
ILMN_1849039		Homo sapiens, clone IMAGE:4183849, mRNA		-0.58	1.89	-1.81	13.17	-0.51	2.53	-1.05	10.91	-0.54	2.69	-1.23	6.92
ILMN_1845157		mRNA; cDNA DKFZp547E107 (from clone DKFZp547E107)		0.03	0.02	-1.26	7.09	-0.59	3.82	-1.54	21.93	-0.95	8.82	-1.3	6.39
ILMN_1838691		BX116929 Soares_multiple_sclerosis_2NbHMSP cDNA clone IMAGp998E17622, mRNA sequence		0.58	1.33	-2.05	12.35	-0.22	0.32	-1.35	10.2	-1.13	6.4	-2.63	15.01
ILMN_1845037		cDNA clone IMAGE:5277162		-0.77	3.51	-1.61	12.01	-0.07	0.09	-1.58	19.75	-1.51	16.34	-0.84	3.93
ILMN_1824016		602349056F1 NIH_MGC_90 cDNA clone IMAGE:4444260 5, mRNA sequence		-0.8	6.53	-1.83	19.79	-0.6	4.72	-1.53	24.9	-0.93	10.08	-1.03	9.3
ILMN_1859787		BX105743 NCI_CGAP_GC6 cDNA clone IMAGp998H135716, mRNA sequence		-0.12	0.11	-1.51	12.69	-0.44	1.74	-1.55	19.31	-1.11	9.89	-1.39	10.31
ILMN_1881526		od80c09.s1 NCI_CGAP_Ov2 cDNA clone IMAGE:1374256, mRNA sequence		-0.44	0.34	-1.24	3.18	-1.36	6.9	-1.68	10.95	-0.32	0.32	-0.79	1.04
ILMN_1904521		zx74f04.s1 Soares ovary tumor NbHOT cDNA clone IMAGE:809503 3 similar to contains element LTR7 repetitive element ;, mRNA sequence		-1.21	2.96	-3.66	16.44	-3.3	21.22	-4.65	35.46	-1.35	4.21	-2.45	9.11
ILMN_1880280		cDNA: FLJ22140 fis, clone HEP20977		-0.44	0.59	-2.15	11.47	-0.96	5.96	-2.14	24.1	-1.17	8.03	-1.71	7.39
ILMN_1819608		mRNA; cDNA DKFZp762M127 (from clone DKFZp762M127)		0.02	0.01	-1.04	5.64	-0.88	6.15	-1.74	21	-0.86	5.58	-1.06	4.94
ILMN_1872032		AGENCOURT_10400346 NIH_MGC_82 cDNA clone IMAGE:6616124 5, mRNA sequence		-0.51	1.03	-2.5	15.8	-0.65	3.19	-1.54	16.42	-0.89	5.49	-1.99	10.95
ILMN_1863185		cDNA FLJ30340 fis, clone BRACE2007411		0.01	0.01	-1.16	5.8	-0.13	0.2	-1.39	14.95	-1.26	11.1	-1.17	5.04
ILMN_2135756	HSF2BP	heat shock transcription factor 2 binding protein (HSF2BP), mRNA.	NM_007031.1	0.27	0.47	-1.44	11.2	0.59	3.68	-0.48	2.73	-1.06	10.43	-1.7	12.47
[truncated: 459 more rows]

## Sheet: BI2_2h
Illumina Identifier	HGNC gene symbol	Gene Description	Refseq ID	BI2 LR(0.08uM+TGFb/UT+DMSO+TGFb)	BI2 -log10(pVAL(0.08uM+TGFb/UT+DMSO+TGFb))	BI2 LR(2uM+TGFb/UT+DMSO+TGFb)	BI2 -log10(pVAL(2uM+TGFb/UT+DMSO+TGFb))	BI2 LR(0.08uM-TGFb/UT+DMSO)	BI2 -log10(pVAL(0.08uM-TGFb/UT+DMSO))	BI2 LR(2uM-TGFb/UT+DMSO)	BI2 -log10(pVAL(2uM-TGFb/UT+DMSO))	BI2 LR(2uM-TGFb/0.08uM-TGFb)	BI2 -log10(pVAL(2uM-TGFb/0.08uM-TGFb))	BI2 LR(2uM+TGFb/0.08uM+TGFb)	BI2 -log10(pVAL(2uM+TGFb/0.08uM+TGFb))
[truncated: 426 more rows]

[truncated: 17 more sheets: BI2_4h, BI2_12h, BI3_2h, BI3_4h, BI3_12h, BI4_2h, BI4_4h, BI4_12h, BI5_2h, BI5_4h, BI5_12h, Ex1_2h, Ex1_4h, Ex1_12h, Ex2_2h, Ex2_4h, Ex2_12h]
